# Supplementary material
Source: HighWire-hosted journal article supplement (https://cmaj.ca/highwire/filestream/74170/field_highwire_adjunct_files/2/190355-res-3-at.pdf)

**Appendix 3 (as supplied by the authors)**

Age-adjusted cancer incidence rates

Appendix to: Brenner DR, Ruan Y, Shaw E, et al. Age-standardized cancer-incidence trends in Canada, 1971–2015. *CMAJ* 2019. doi: 10.1503/cmaj.190355.

Copyright © 2019 The Author(s) or their employer(s).

To receive this resource in an accessible format, please contact us at [cmajgroup@cmaj.ca](mailto:cmajgroup@cmaj.ca).

## Contents

|                                                                                                             |    |
|-------------------------------------------------------------------------------------------------------------|----|
| Figure 1-7. Age-adjusted incidence rates of all cancers in males in Canada, 1971-2015 .....                 | 6  |
| Figure 8-14. Age-adjusted incidence rates of all cancers in females in Canada, 1971-2015.....               | 13 |
| Figure 15-23. Age-adjusted incidence rates of acute myeloid leukemia in males in Canada, 1971-2015.....     | 20 |
| Figure 24-31. Age-adjusted incidence rates of acute myeloid leukemia in females in Canada, 1971-2015.....   | 29 |
| Figure 32-40. Age-adjusted incidence rates of anal cancer in males in Canada, 1971-2015.....                | 37 |
| Figure 41-49. Age-adjusted incidence rates of anal cancer in females in Canada, 1971-2015.....              | 46 |
| Figure 50-55. Age-adjusted incidence rates of bladder cancer in males in Canada, 1971-2015 .....            | 55 |
| Figure 56-62. Age-adjusted incidence rates of bladder cancer in females in Canada, 1971-2015 .....          | 61 |
| Figure 63-70. Age-adjusted incidence rates of breast cancer in females in Canada, 1971-2015 .....           | 68 |
| Figure 71-78. Age-adjusted incidence rates of cervical cancer in females in Canada, 1971-2015 .....         | 76 |
| Figure 80-87. Age-adjusted incidence rates of chronic myeloid leukemia in males in Canada, 1971-2015.....   | 85 |
| Figure 88-95. Age-adjusted incidence rates of chronic myeloid leukemia in females in Canada, 1971-2015..... | 93 |

|                                                                                                         |     |
|---------------------------------------------------------------------------------------------------------|-----|
| Figure 96-104. Age-adjusted incidence rates of colon cancer in males aged in Canada, 1971-2015 .....    | 101 |
| Figure 105-112. Age-adjusted incidence rates of colon cancer in females in Canada, 1971-2015 .....      | 110 |
| Figure 113-121. Age-adjusted incidence rates of colorectal cancer in males in Canada, 1971-2015 .....   | 118 |
| Figure 122-129. Age-adjusted incidence rates of colorectal cancer in females in Canada, 1971-2015.....  | 127 |
| Figure 130-137. Age-adjusted incidence rates of uterine cancer in females in Canada, 1971-2015 .....    | 135 |
| Figure 138-146. Age-adjusted incidence rates of esophageal cancer in males in Canada, 1971-2015.....    | 143 |
| Figure 147-155. Age-adjusted incidence rates of esophageal cancer in females in Canada, 1971-2015.....  | 152 |
| Figure 156-164. Age-adjusted incidence rates of gallbladder cancer in males in Canada, 1971-2015.....   | 161 |
| Figure 165-173. Age-adjusted incidence rates of gallbladder cancer in females in Canada, 1971-2015..... | 170 |
| Figure 174-182. Age-adjusted incidence rates of kidney cancer in males in Canada, 1971-2015 .....       | 179 |
| Figure 183-190. Age-adjusted incidence rates of kidney cancer in females in Canada, 1971-2015 .....     | 188 |
| Figure 191-199. Age-adjusted incidence rates of laryngeal cancer in males in Canada, 1971-2015 .....    | 196 |
| Figure 200-208. Age-adjusted incidence rates of laryngeal cancer in females in Canada, 1971-2015.....   | 205 |

|                                                                                                                       |     |
|-----------------------------------------------------------------------------------------------------------------------|-----|
| Figure 209-217. Age-adjusted incidence rates of liver cancer in males in Canada, 1971-2015 .....                      | 214 |
| Figure 218-226. Age-adjusted incidence rates of liver cancer in females in Canada, 1971-2015 .....                    | 223 |
| Figure 227-235. Age-adjusted incidence rates of lung cancer in males in Canada, 1971-2015 .....                       | 232 |
| Figure 236-243. Age-adjusted incidence rates of lung cancer in females in Canada, 1971-2015 .....                     | 241 |
| Figure 244-252. Age-adjusted incidence rates of multiple myeloma in males in Canada, 1971-2015.....                   | 249 |
| Figure 253-261. Age-adjusted incidence rates of multiple myeloma in females in Canada, 1971-2015.....                 | 258 |
| Figure 262-270. Age-adjusted incidence rates of non-Hodgkin's lymphoma in males in Canada, 1971-2015.....             | 267 |
| Figure 271-278. Age-adjusted incidence rates of non-Hodgkin's lymphoma in females in Canada, 1971-2015 .....          | 276 |
| Figure 279-287. Age-adjusted incidence rates of oral cancer in males in Canada, 1971-2015.....                        | 284 |
| Figure 288-295. Age-adjusted incidence rates of oral cancer in females in Canada, 1971-2015 .....                     | 293 |
| Figure 296-303. Age-adjusted incidence rates of ovarian cancer in females aged 20-29 years in Canada, 1971-2015 ..... | 301 |
| Figure 304-312. Age-adjusted incidence rates of pancreatic cancer in males in Canada, 1971-2015 .....                 | 309 |
| Figure 313-320. Age-adjusted incidence rates of pancreatic cancer in females in Canada, 1971-2015.....                | 318 |

|                                                                                                            |     |
|------------------------------------------------------------------------------------------------------------|-----|
| Figure 321-329. Age-adjusted incidence rates of prostate cancer in males in Canada, 1971-2015.....         | 326 |
| Figure 330-337. Age-adjusted incidence rates of rectal cancer in males in Canada, 1971-2015 .....          | 335 |
| Figure 339-346. Age-adjusted incidence rates of rectal cancer in females in Canada, 1971-2015.....         | 344 |
| Figure 347-354. Age-adjusted incidence rates of skin melanoma in males in Canada, 1971-2015 .....          | 352 |
| Figure 355-363. Age-adjusted incidence rates of skin melanoma cancer in females in Canada, 1971-2015 ..... | 360 |
| Figure 364-371. Age-adjusted incidence rates of stomach cancer in males in Canada, 1971-2015 .....         | 369 |
| Figure 372-380. Age-adjusted incidence rates of stomach cancer in females in Canada, 1971-2015 .....       | 377 |
| Figure 381-388. Age-adjusted incidence rates of testicular cancer in males in Canada, 1971-2015 .....      | 386 |
| Figure 389-397. Age-adjusted incidence rates of thyroid cancer in males in Canada, 1971-2015 .....         | 395 |
| Figure 398-406. Age-adjusted incidence rates of thyroid cancer in females in Canada, 1971-2015 .....       | 404 |

**Figure 1. Age-adjusted incidence rates of all cancers in males aged 20–29 years in Canada, 1971–2015**

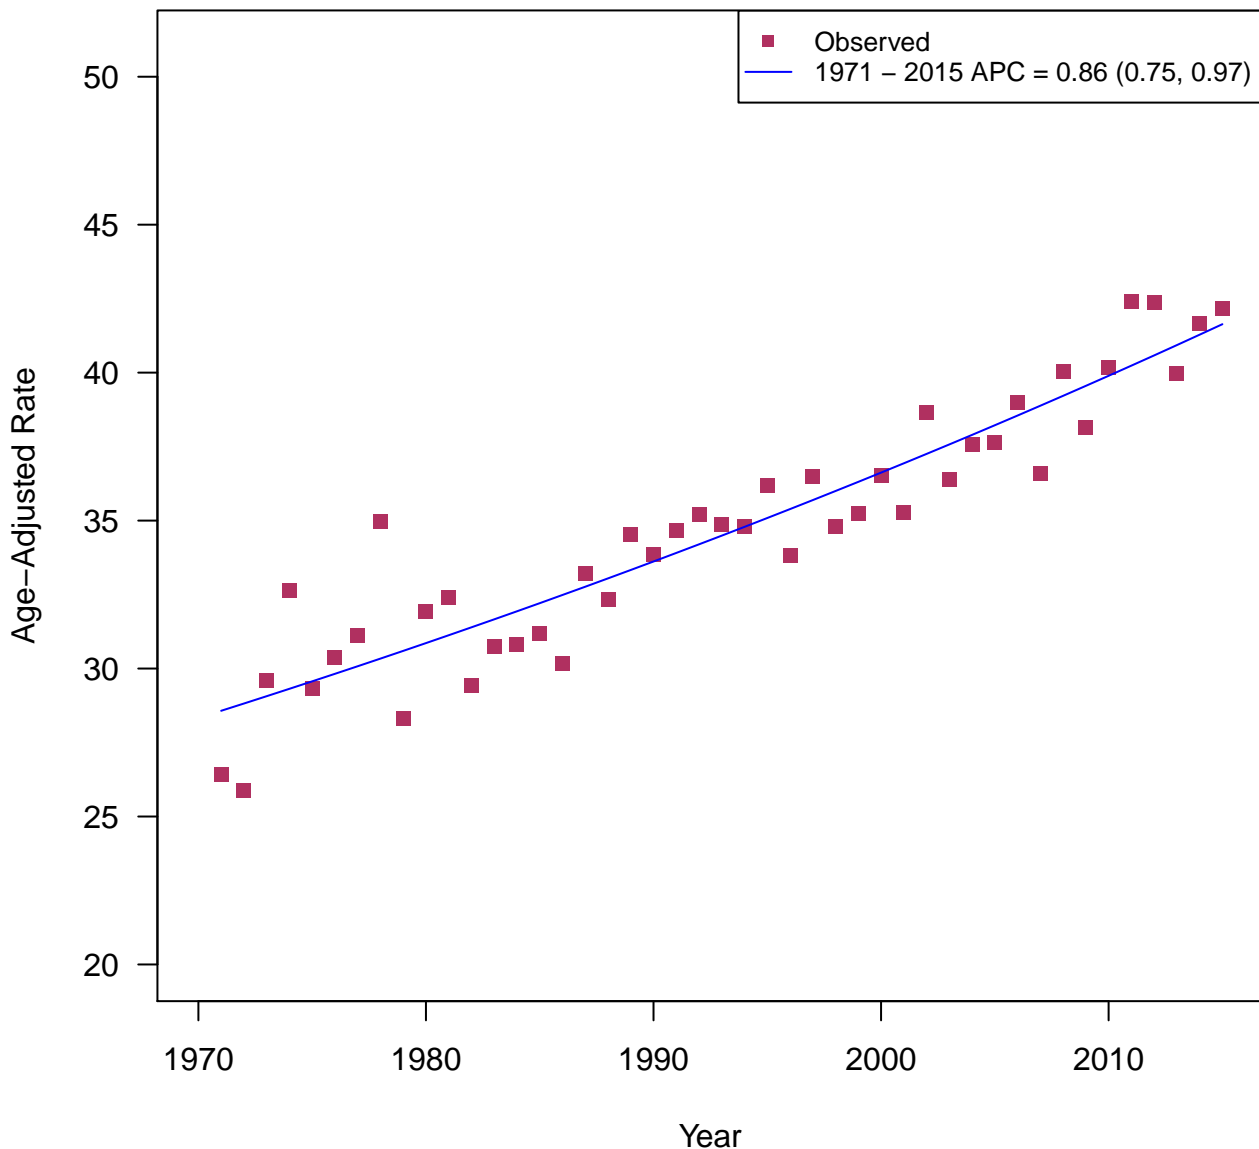

**Figure 2. Age-adjusted incidence rates of all cancers in males aged 30–39 years in Canada, 1971–2015**

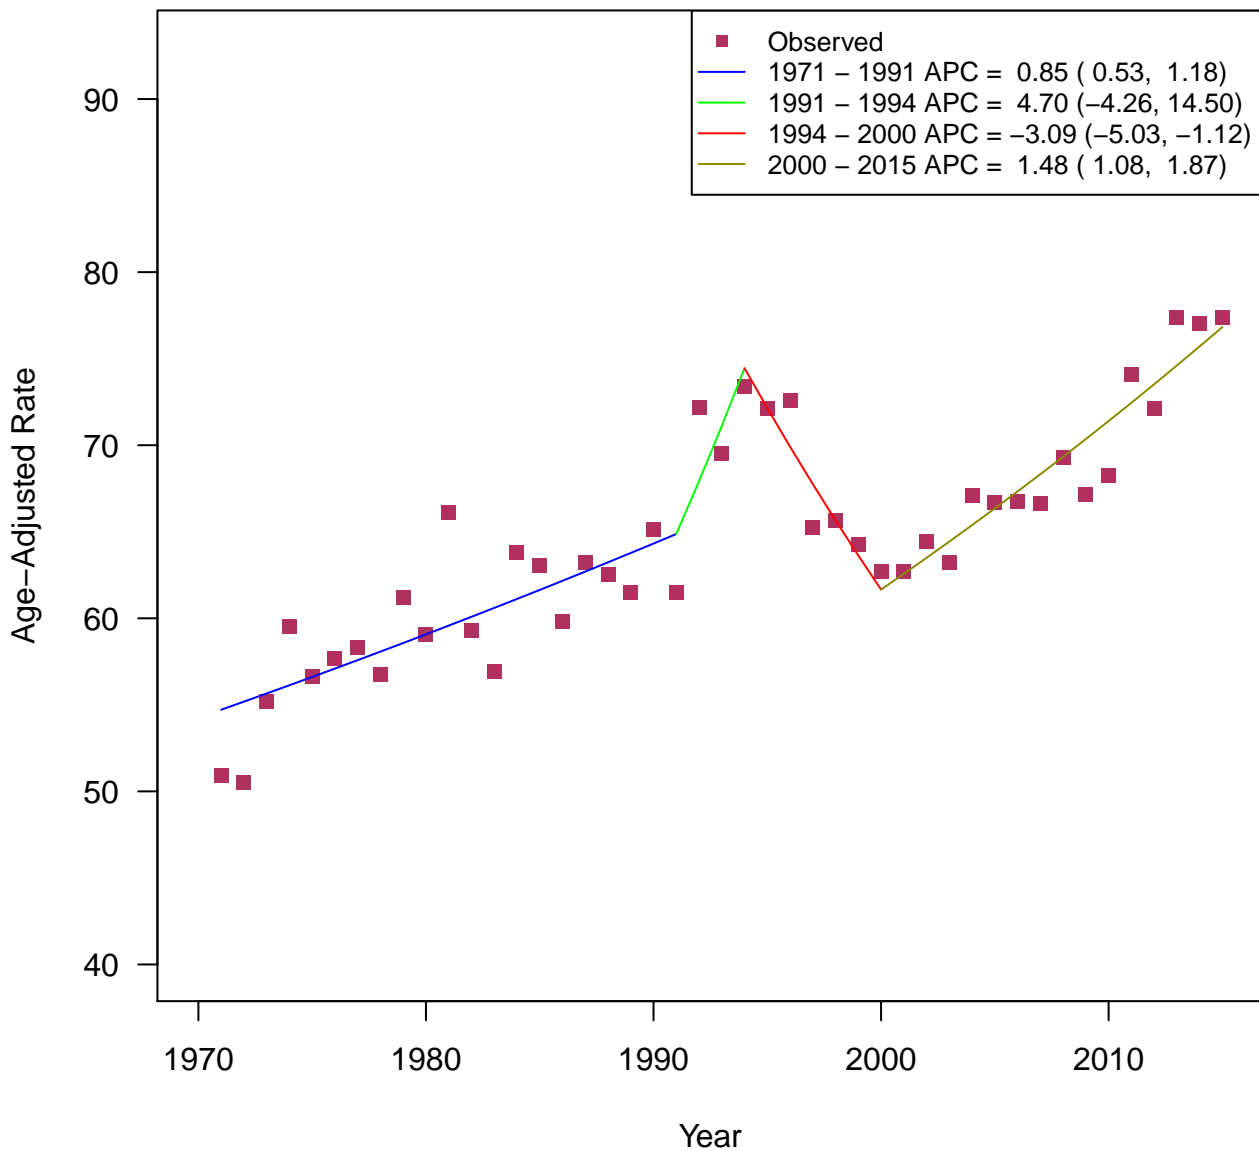

**Figure 3. Age-adjusted incidence rates of all cancers in males aged 40–49 years in Canada, 1971–2015**

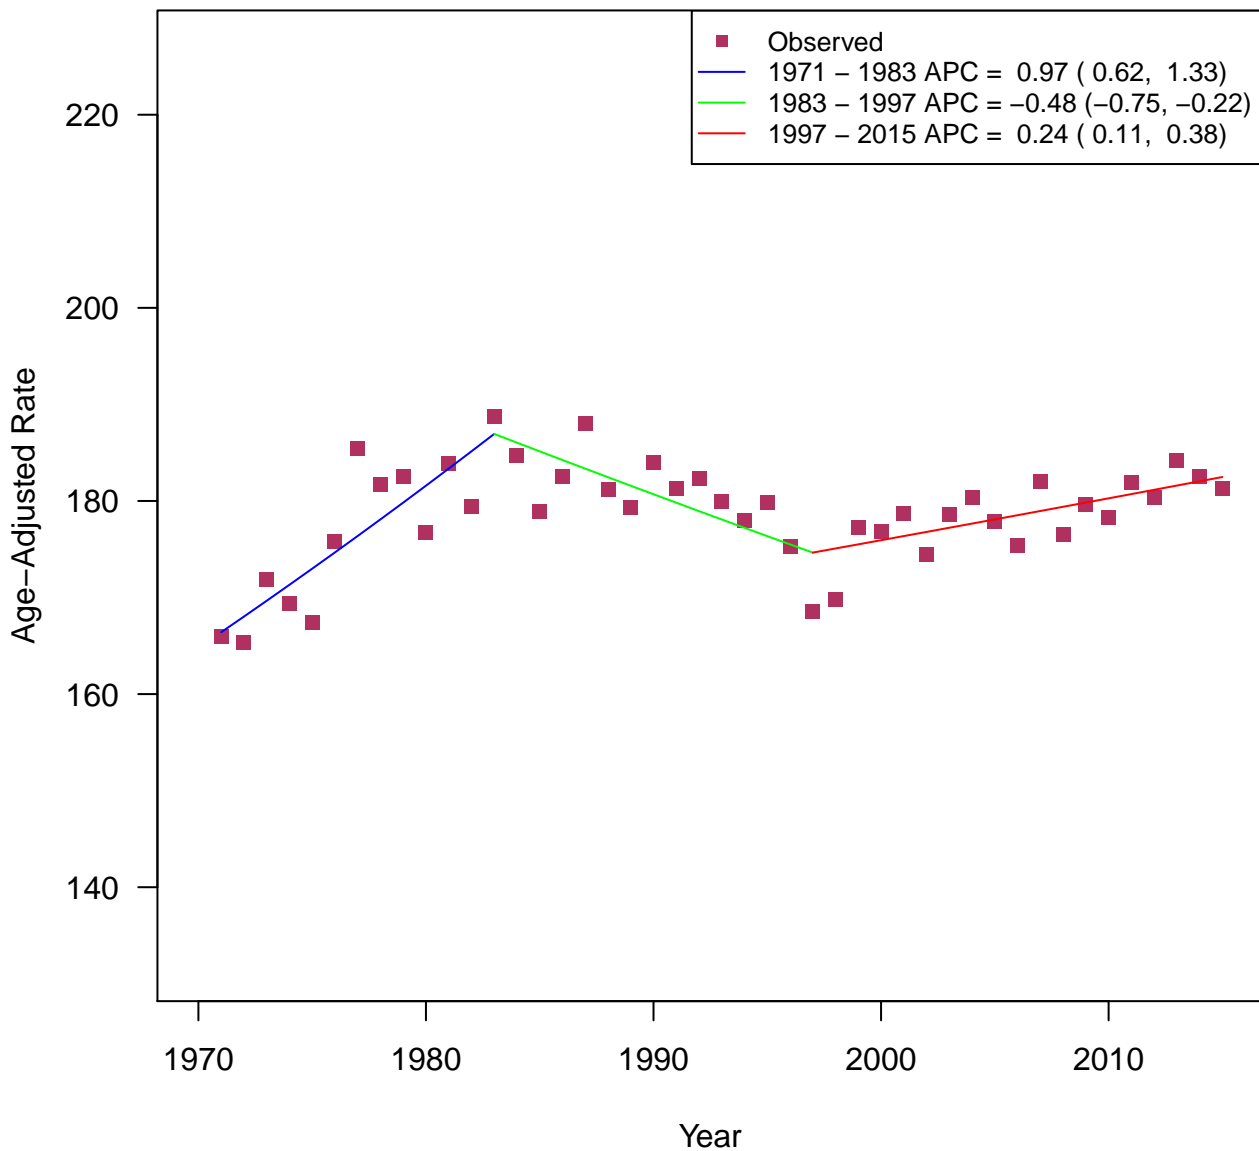



**Figure 4. Age-adjusted incidence rates of all cancers in males aged 50–59 years in Canada, 1971–2015**

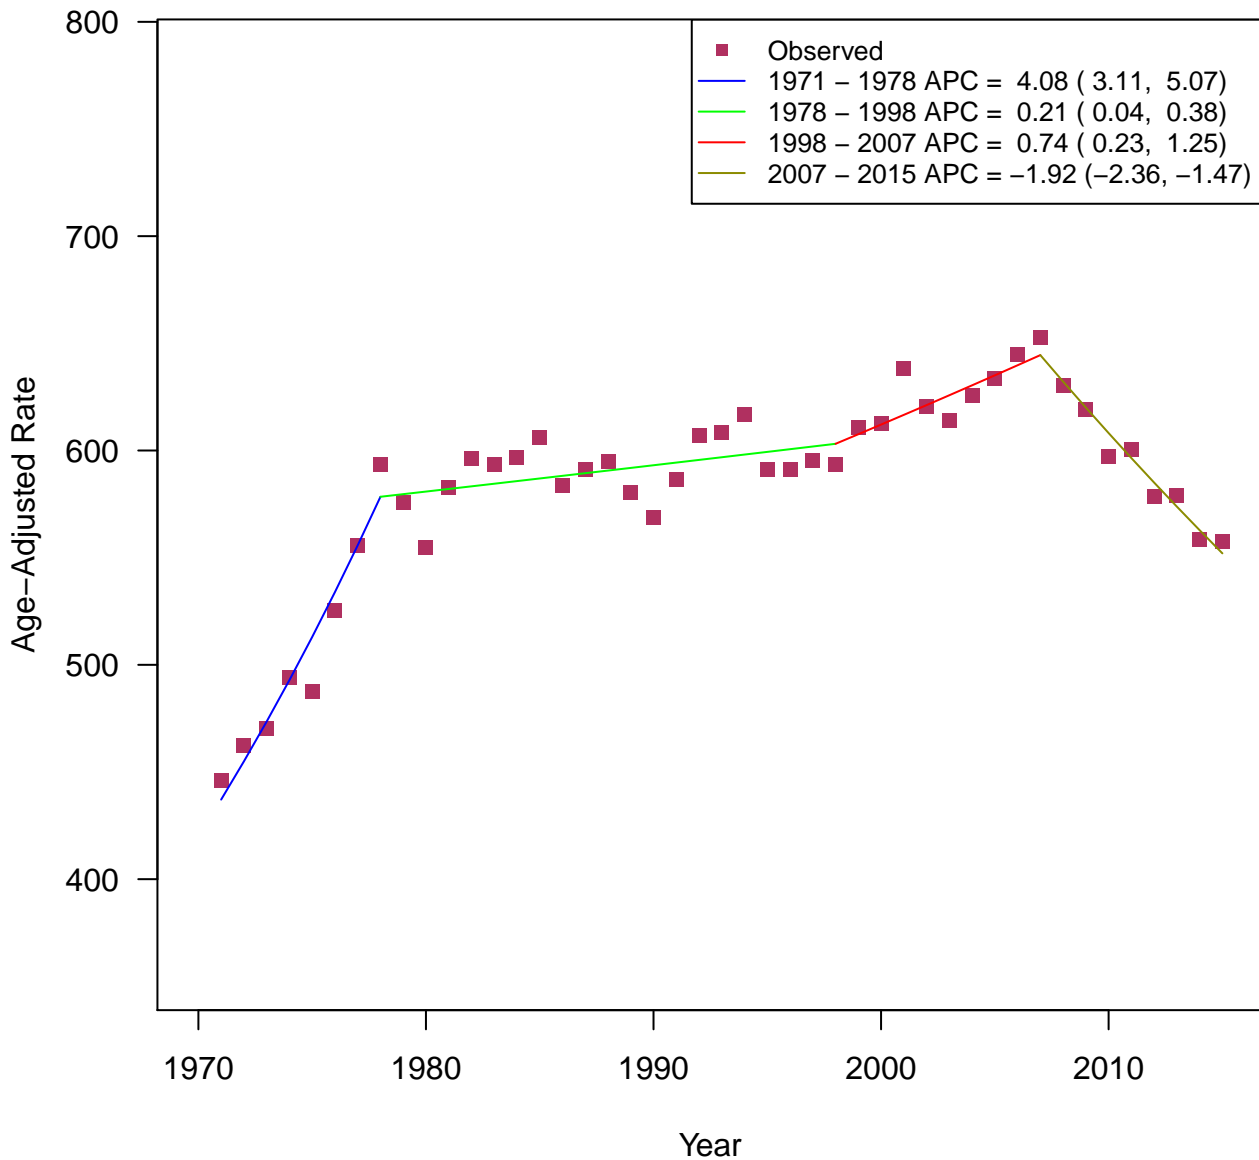

**Figure 5. Age-adjusted incidence rates of all cancers in males aged 60–69 years in Canada, 1971–2015**

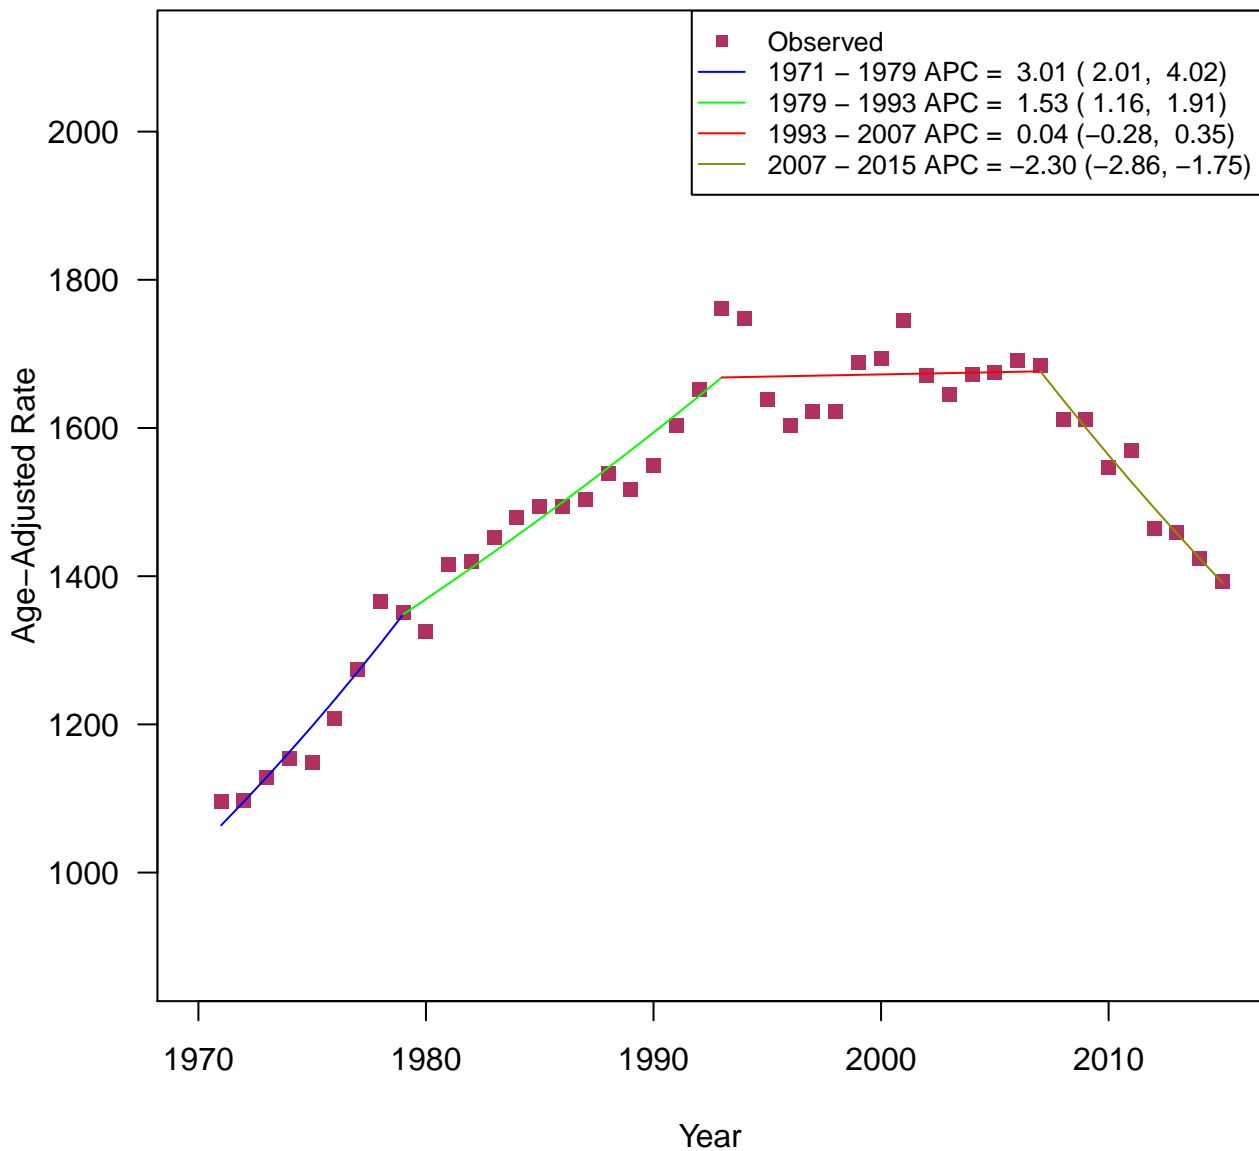

**Figure 6. Age-adjusted incidence rates of all cancers in males aged 70–79 years in Canada, 1971–2015**

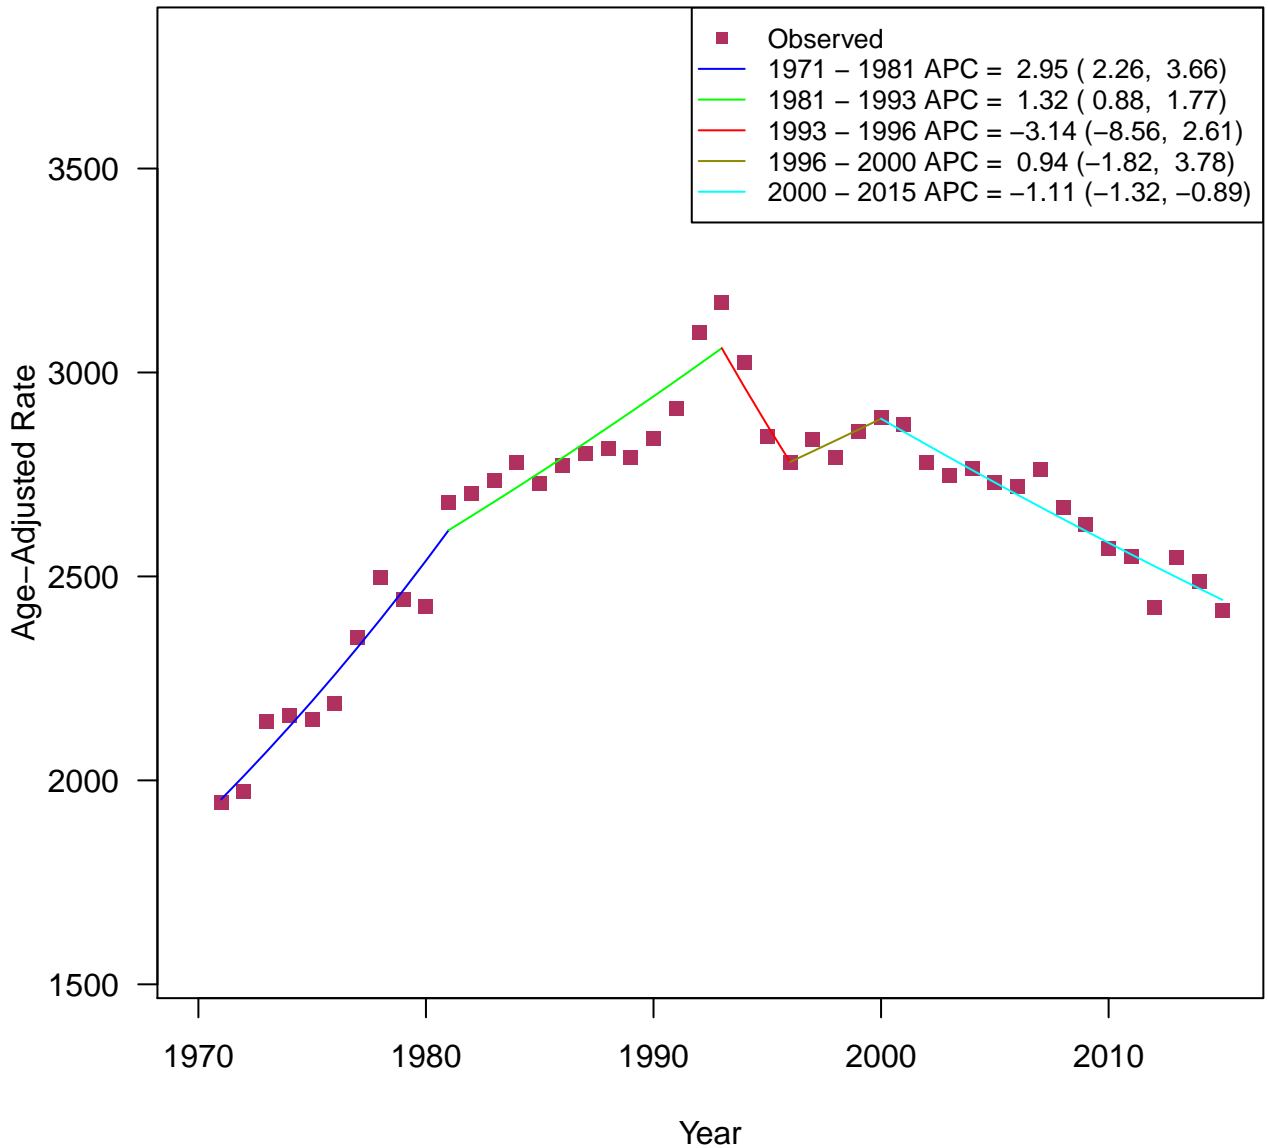

**Figure 7. Age-adjusted incidence rates of all cancers in males aged 80–89 years in Canada, 1971–2015**

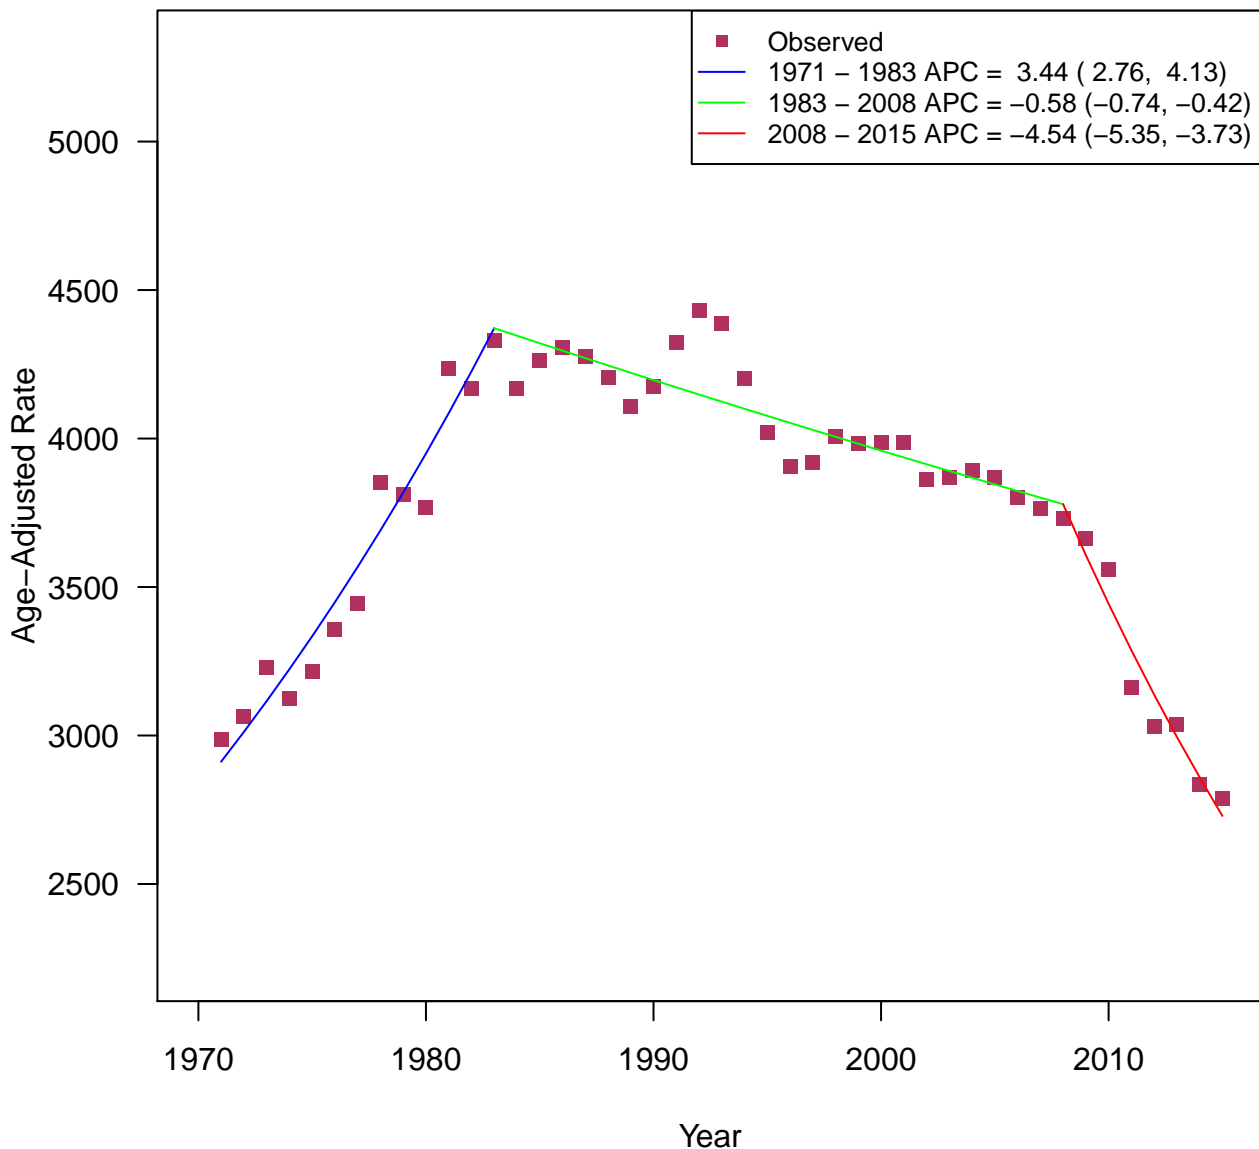

**Figure 8. Age-adjusted incidence rates of all cancers in females aged 20–29 years in Canada, 1971–2015**

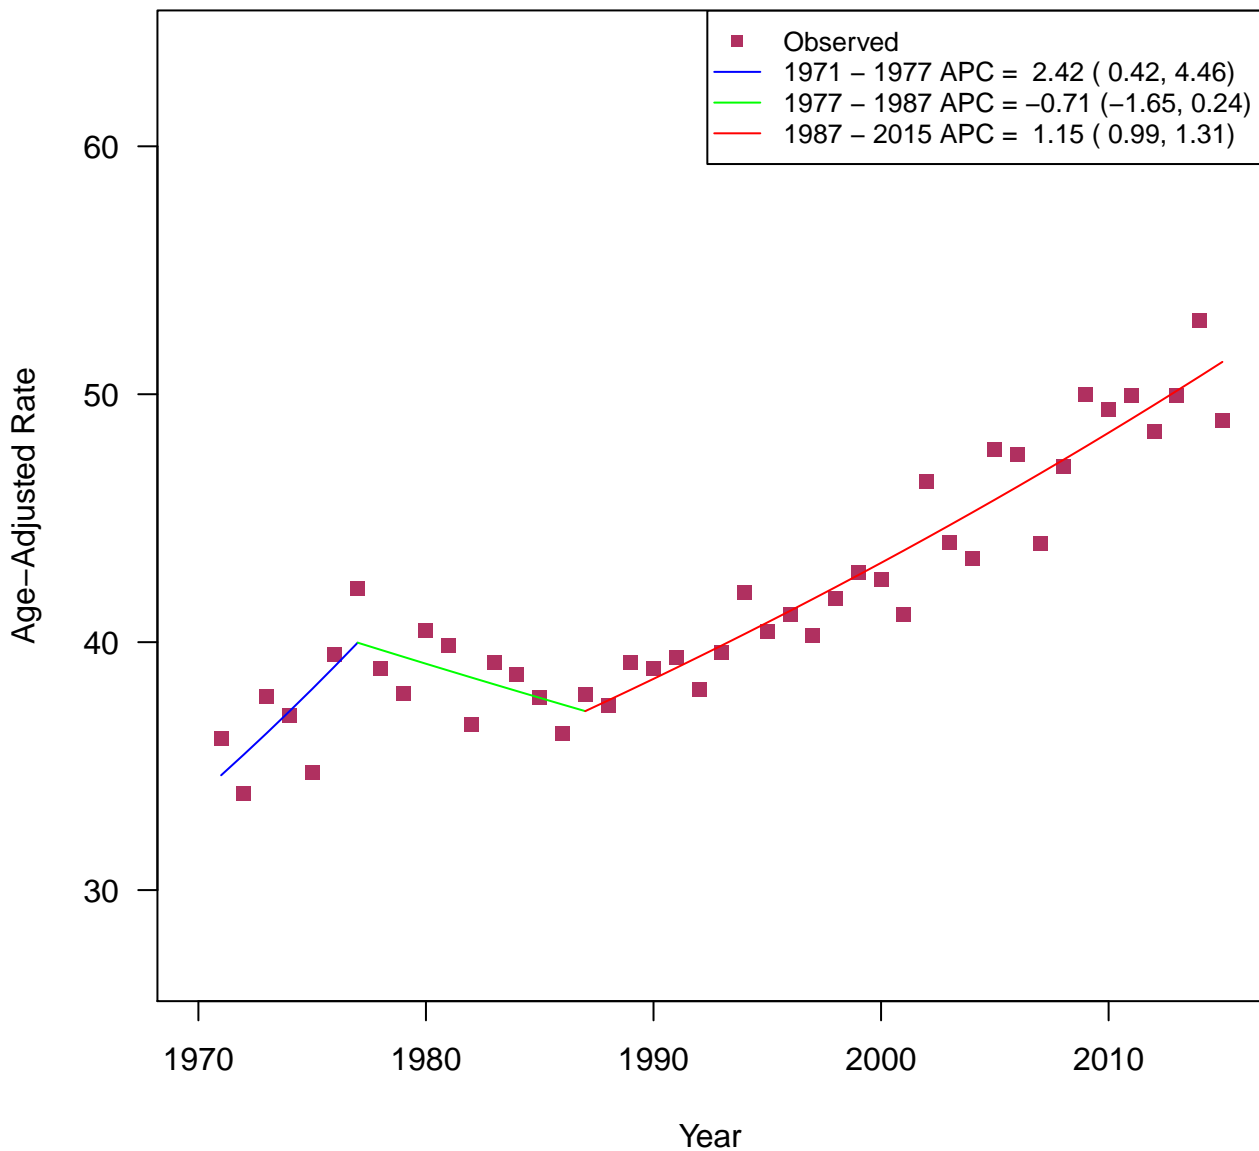

**Figure 9. Age-adjusted incidence rates of all cancers in females aged 30–39 years in Canada, 1971–2015**

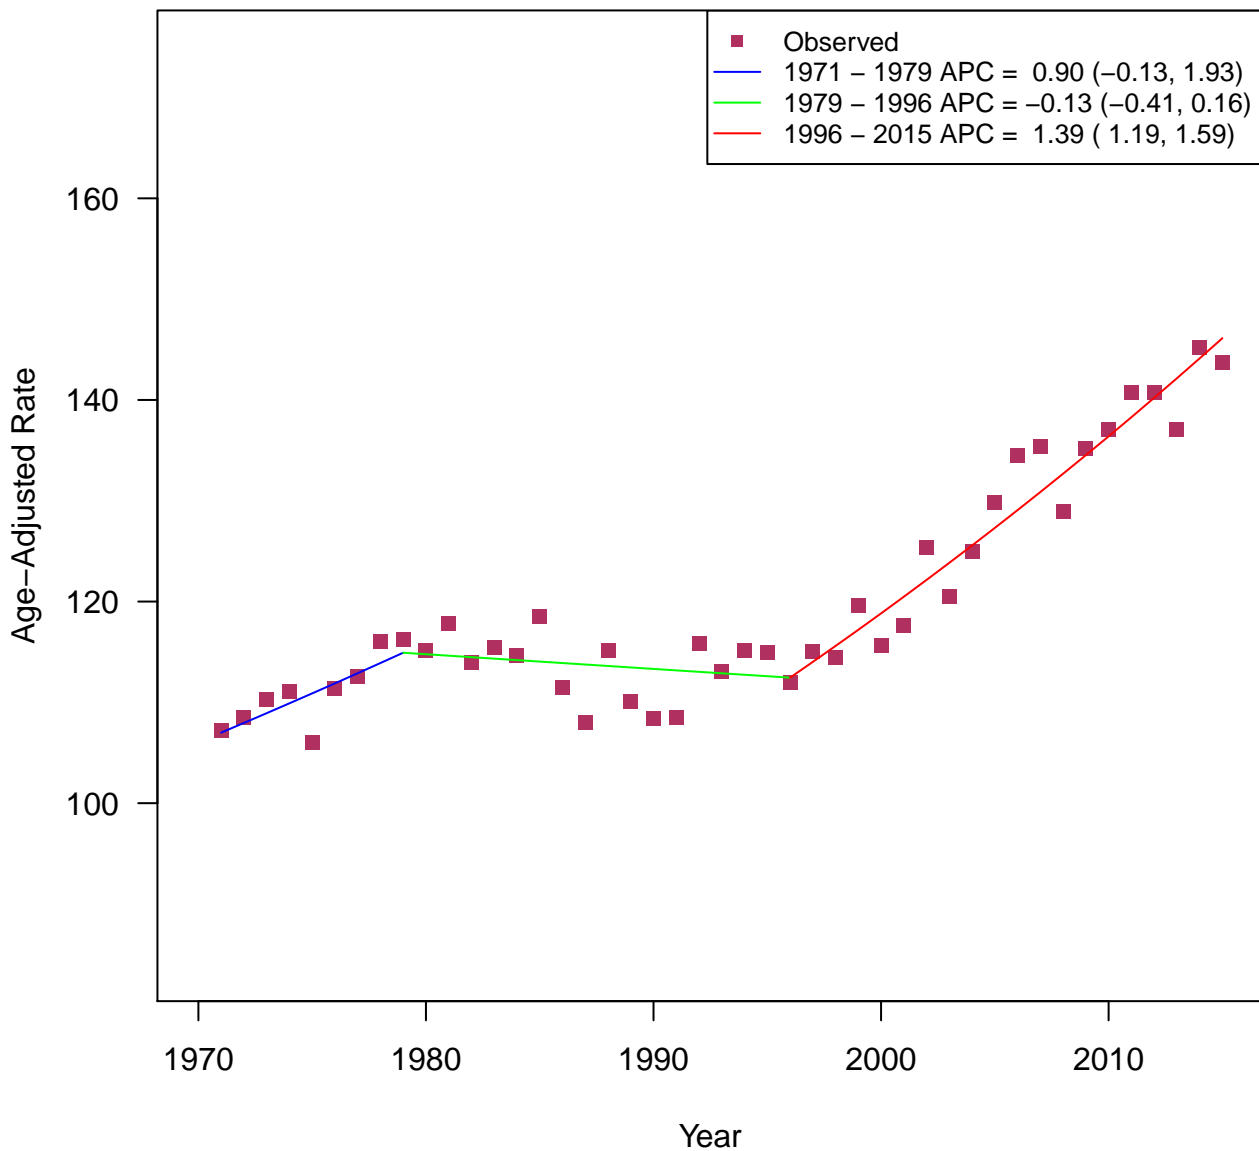

**Figure 10. Age-adjusted incidence rates of all cancers in females aged 40–49 years in Canada, 1971–2015**

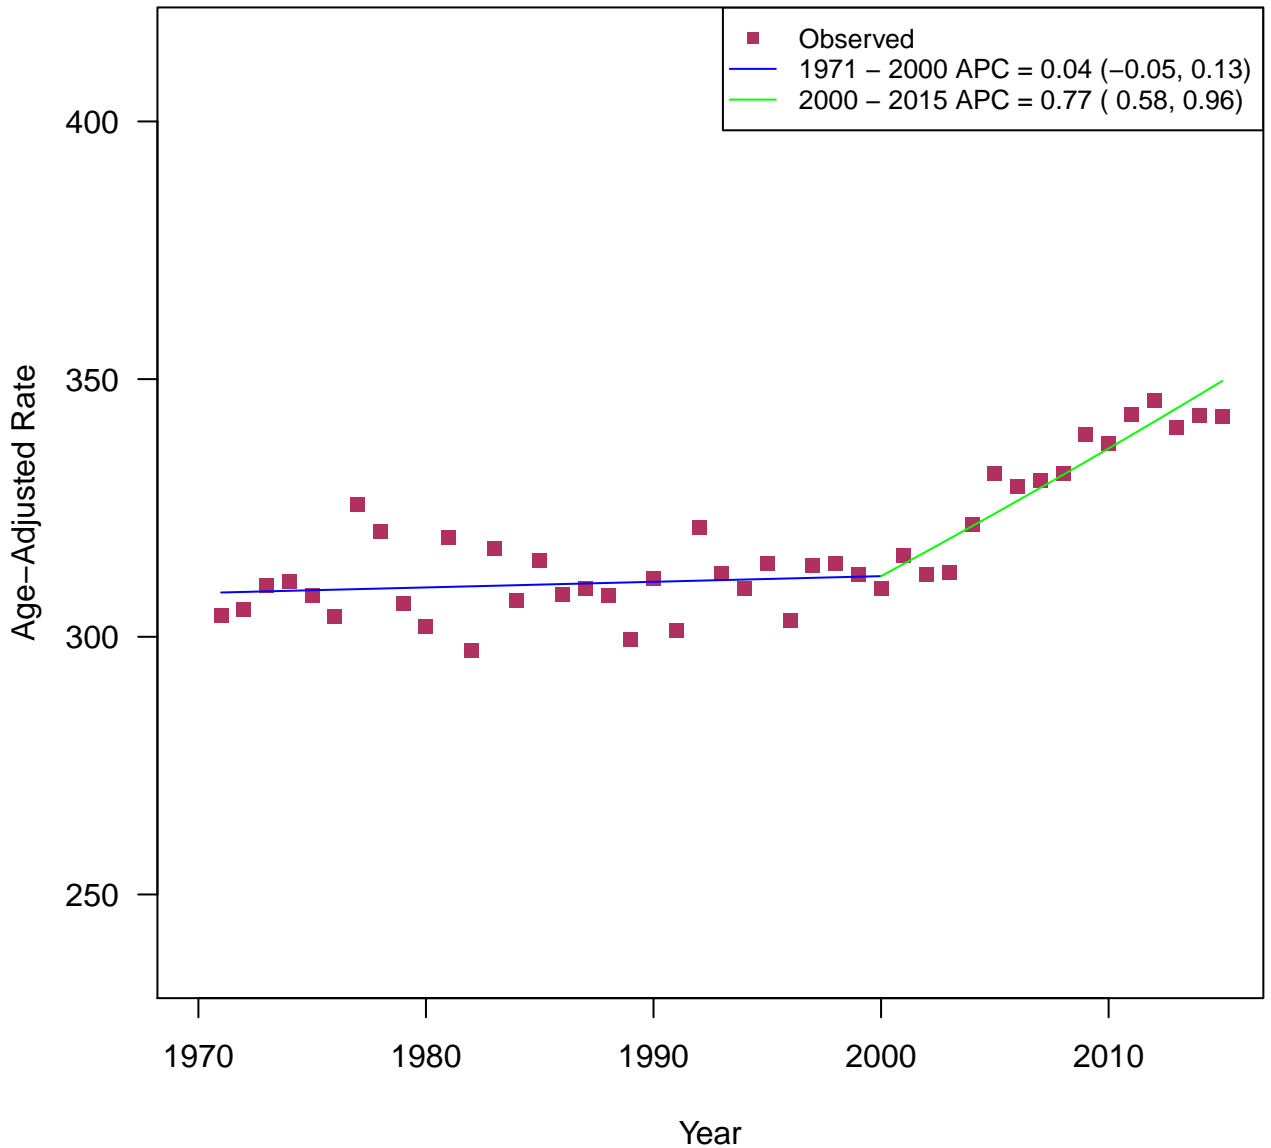

**Figure 11. Age-adjusted incidence rates of all cancers in females aged 50–59 years in Canada, 1971–2015**

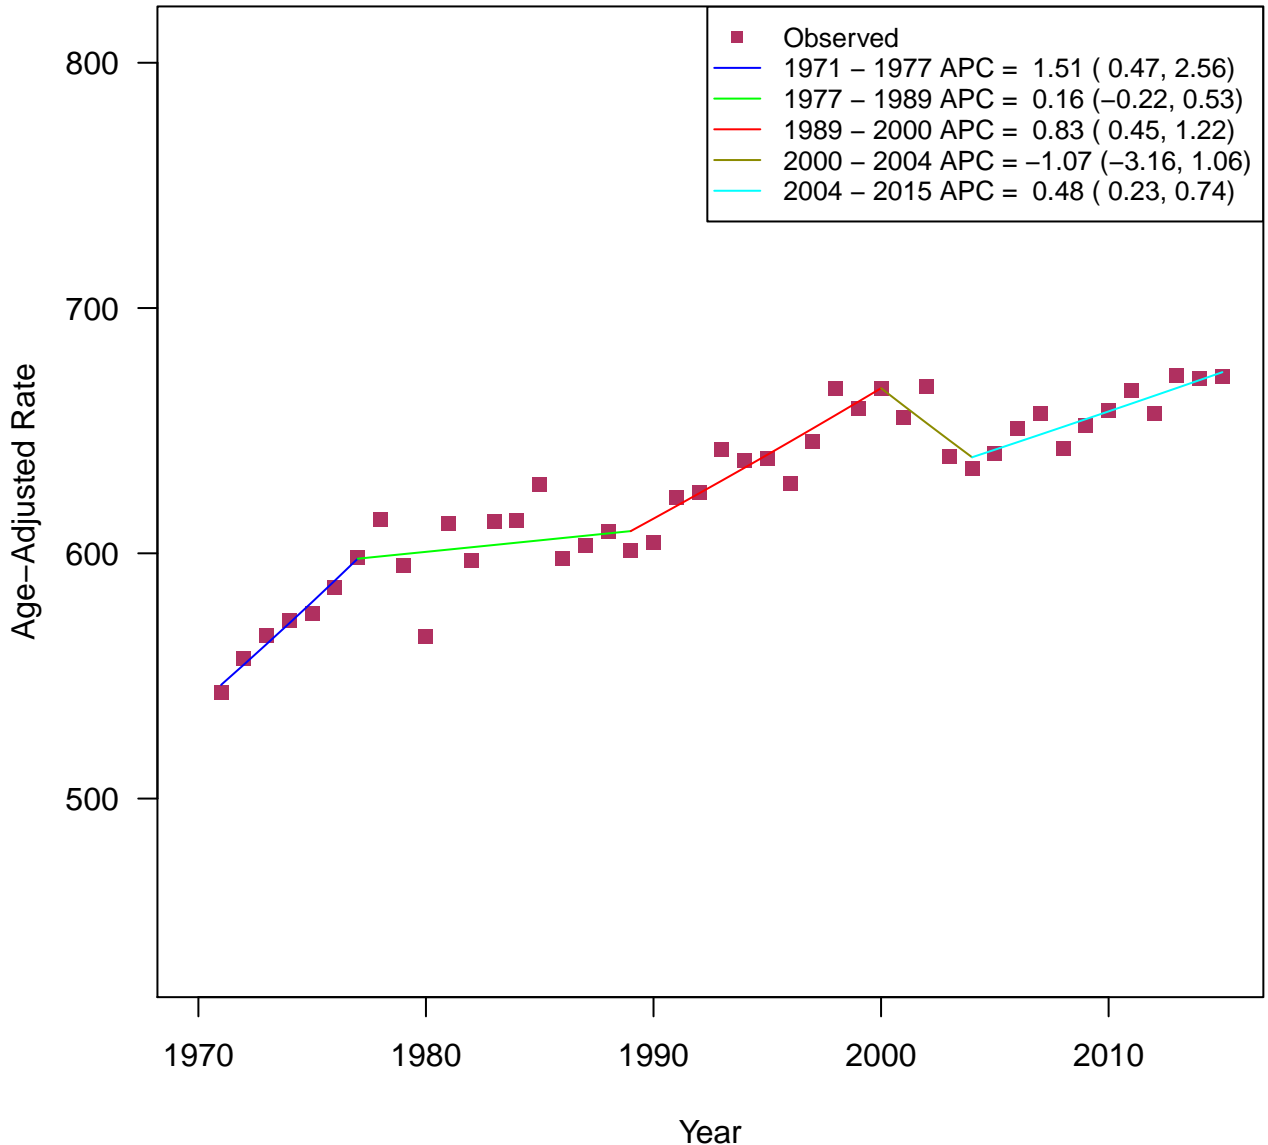



**Figure 12. Age-adjusted incidence rates of all cancers in females aged 60–69 years in Canada, 1971–2015**

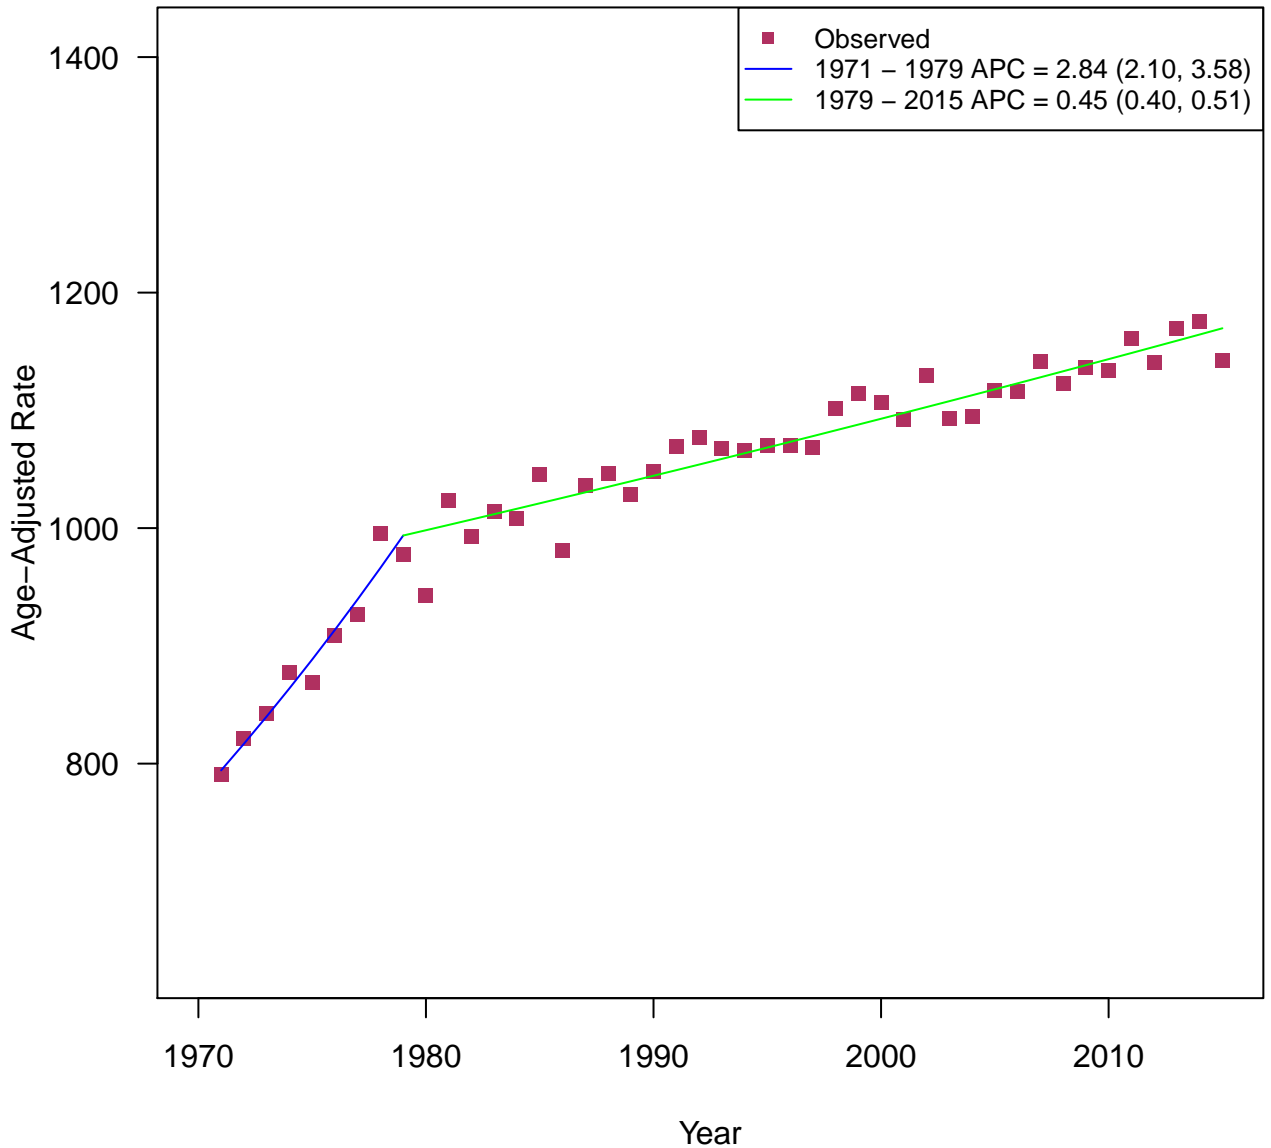

**Figure 13. Age-adjusted incidence rates of all cancers in females aged 70–79 years in Canada, 1971–2015**

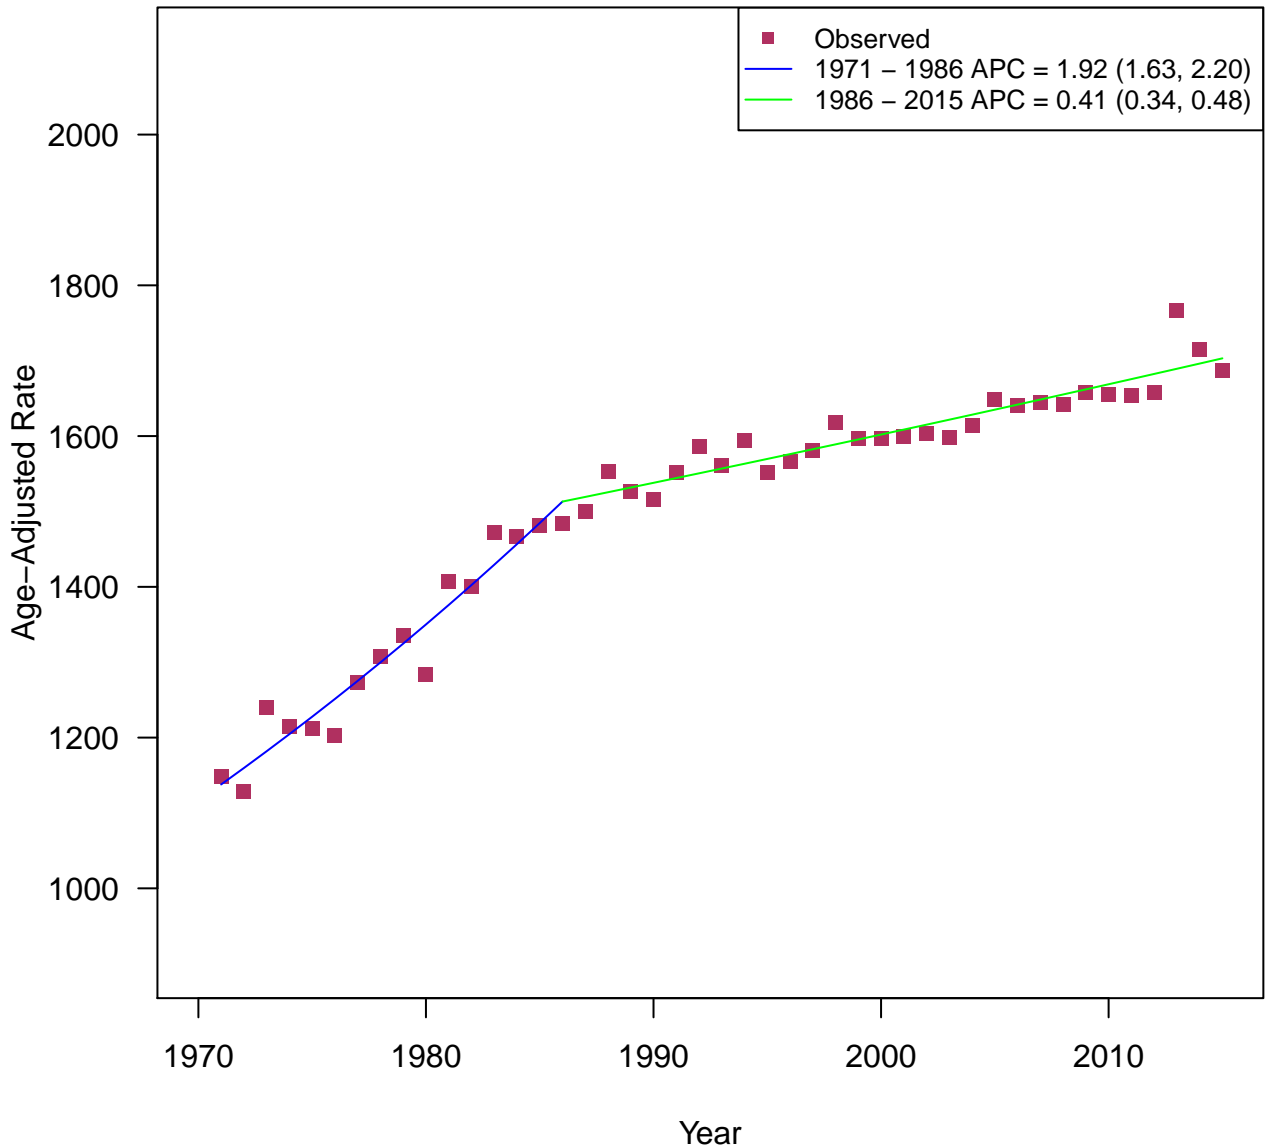

**Figure 14. Age-adjusted incidence rates of all cancers in females aged 80–89 years in Canada, 1971–2015**

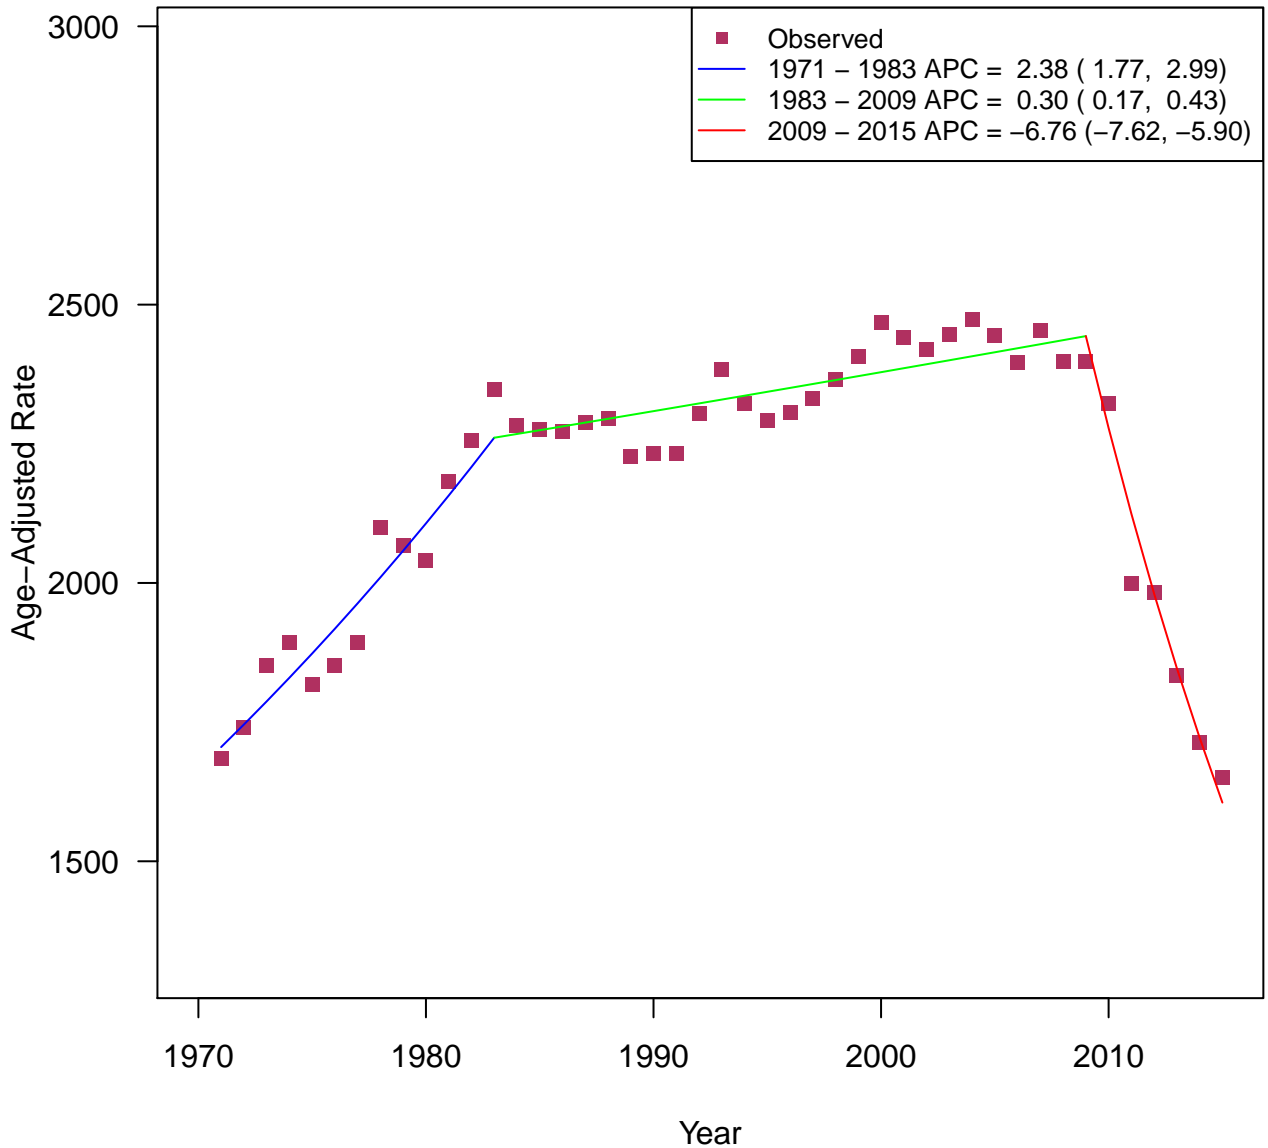

**Figure 15. Age-adjusted incidence rates of acute myeloid leukemia in males aged 20–29 years in Canada, 1971–2015**

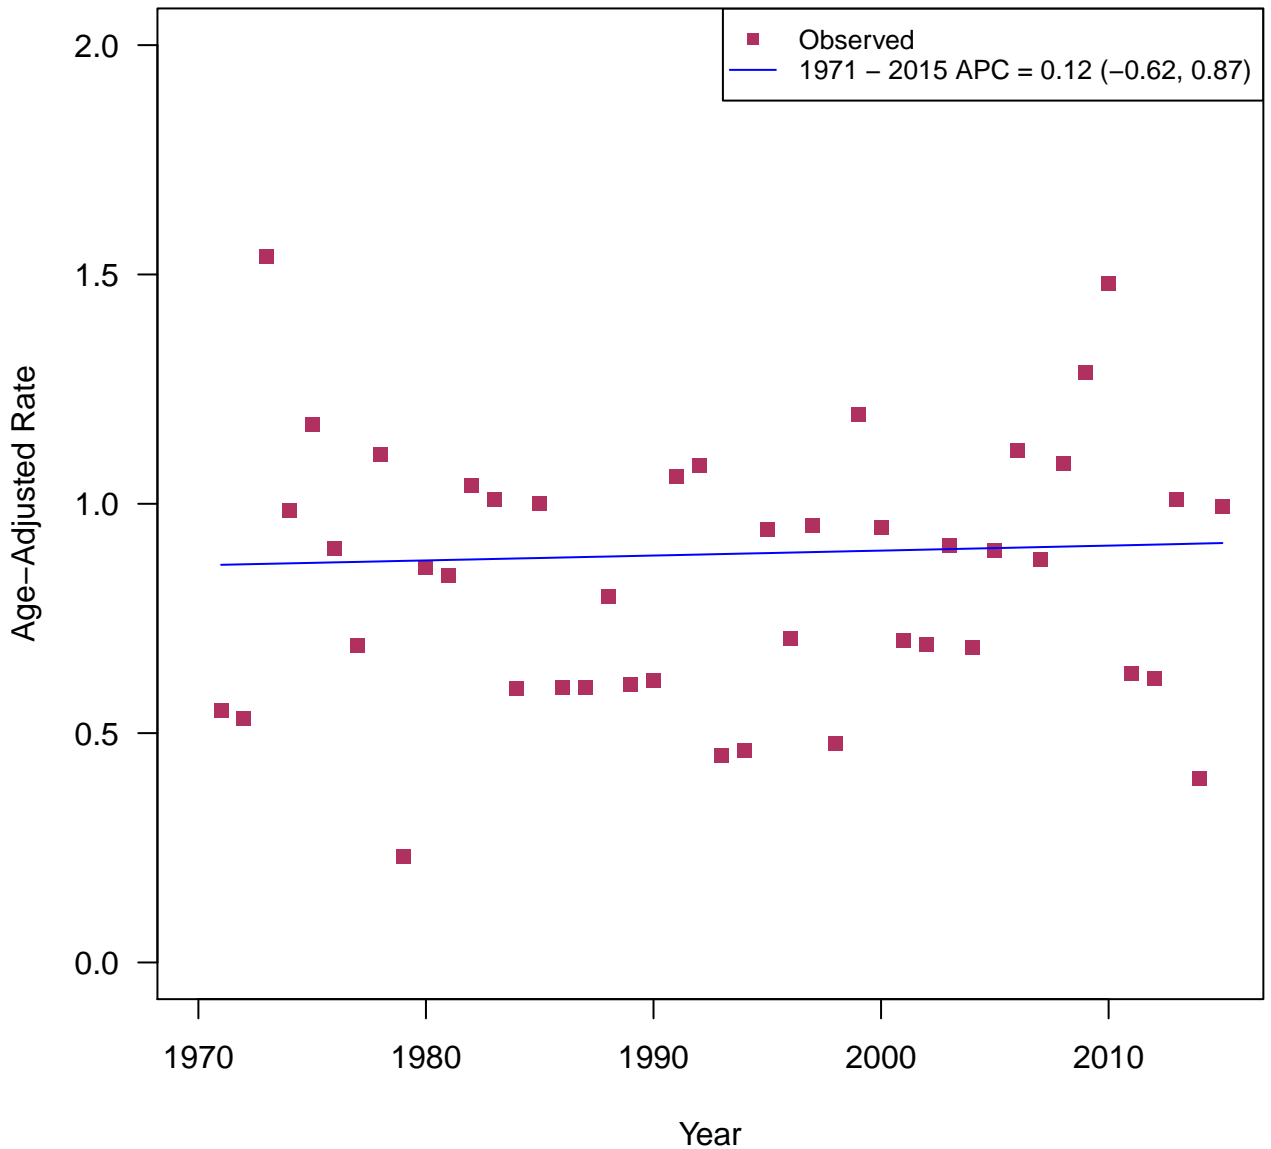

**Figure 16. Age-adjusted incidence rates of acute myeloid leukemia in males aged 20–39 years in Canada, 1971–2015**

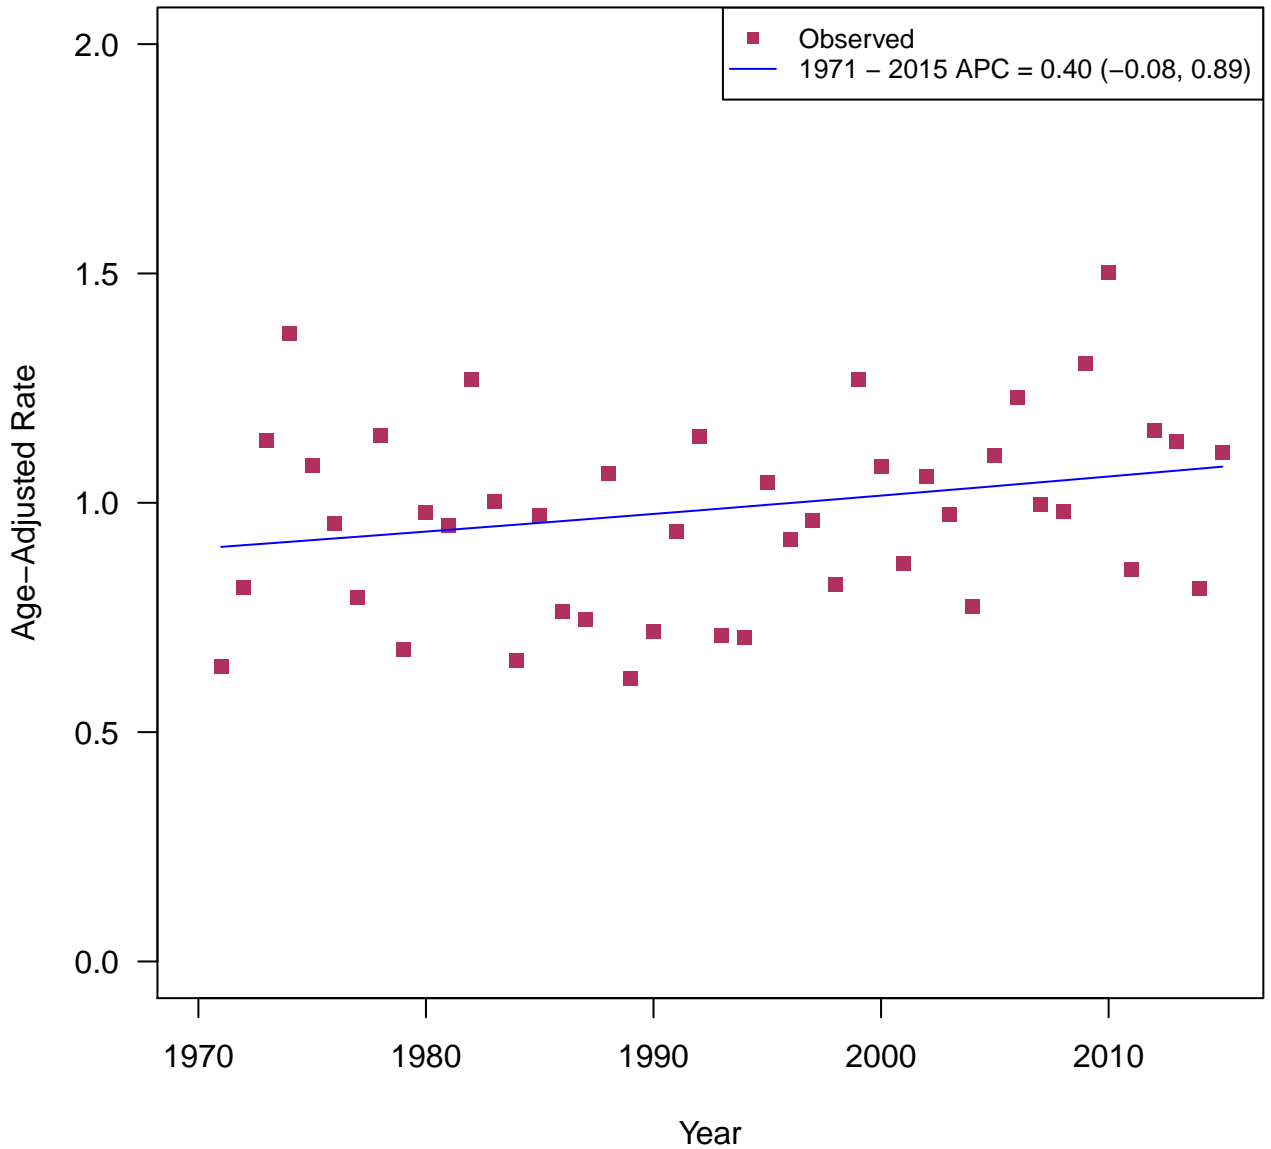

**Figure 17. Age-adjusted incidence rates of acute myeloid leukemia in males aged 20–49 years in Canada, 1971–2015**

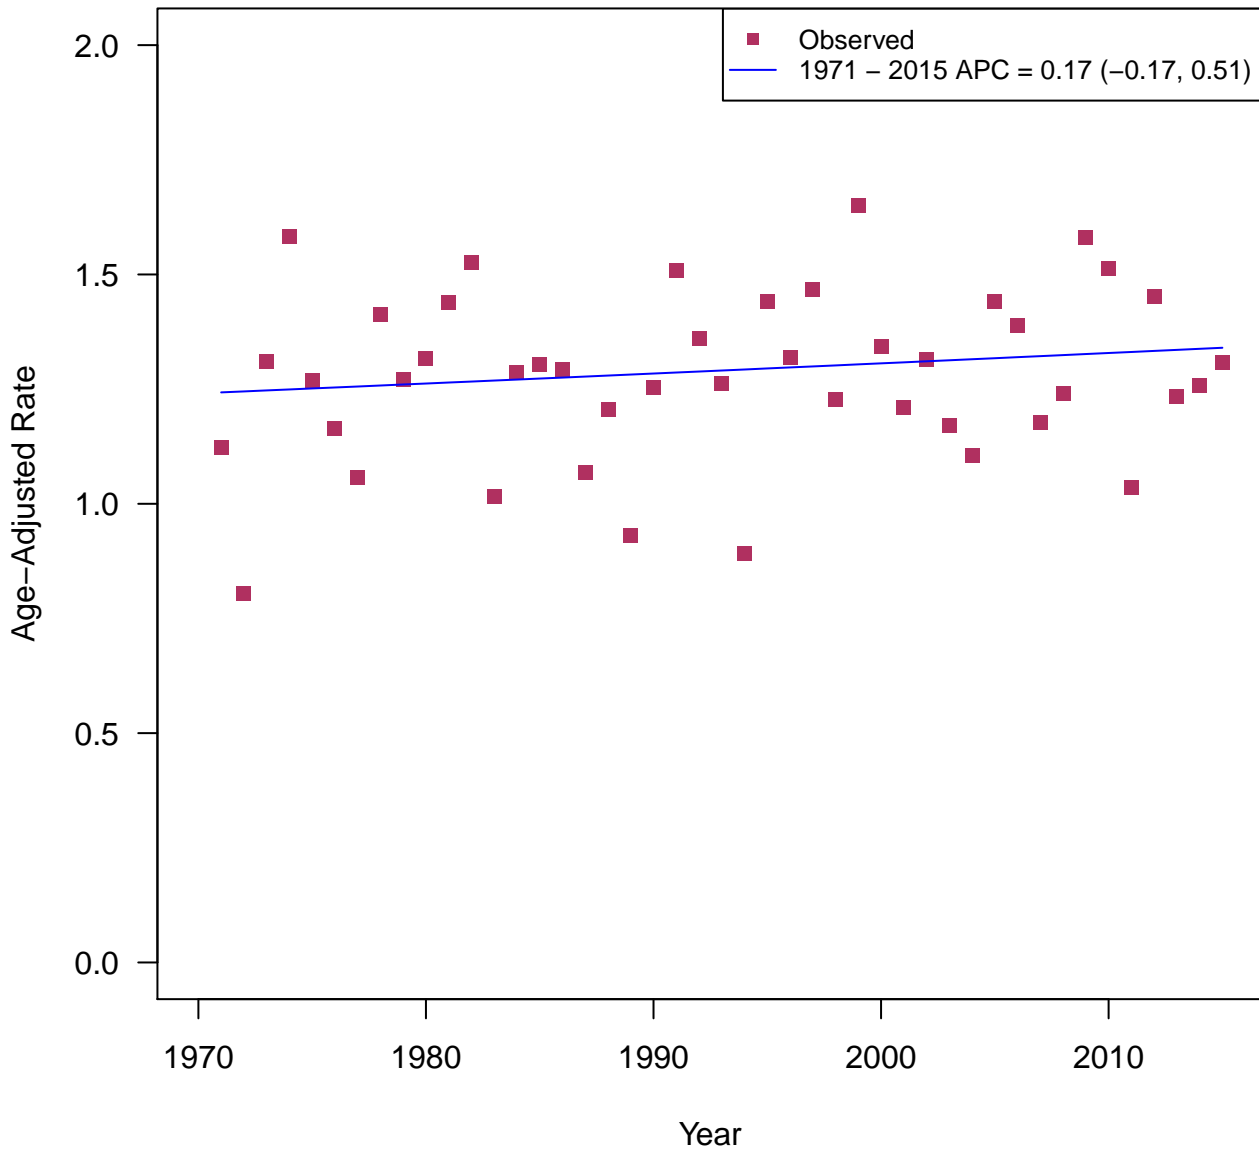

**Figure 18. Age-adjusted incidence rates of acute myeloid leukemia in males aged 30–39 years in Canada, 1971–2015**

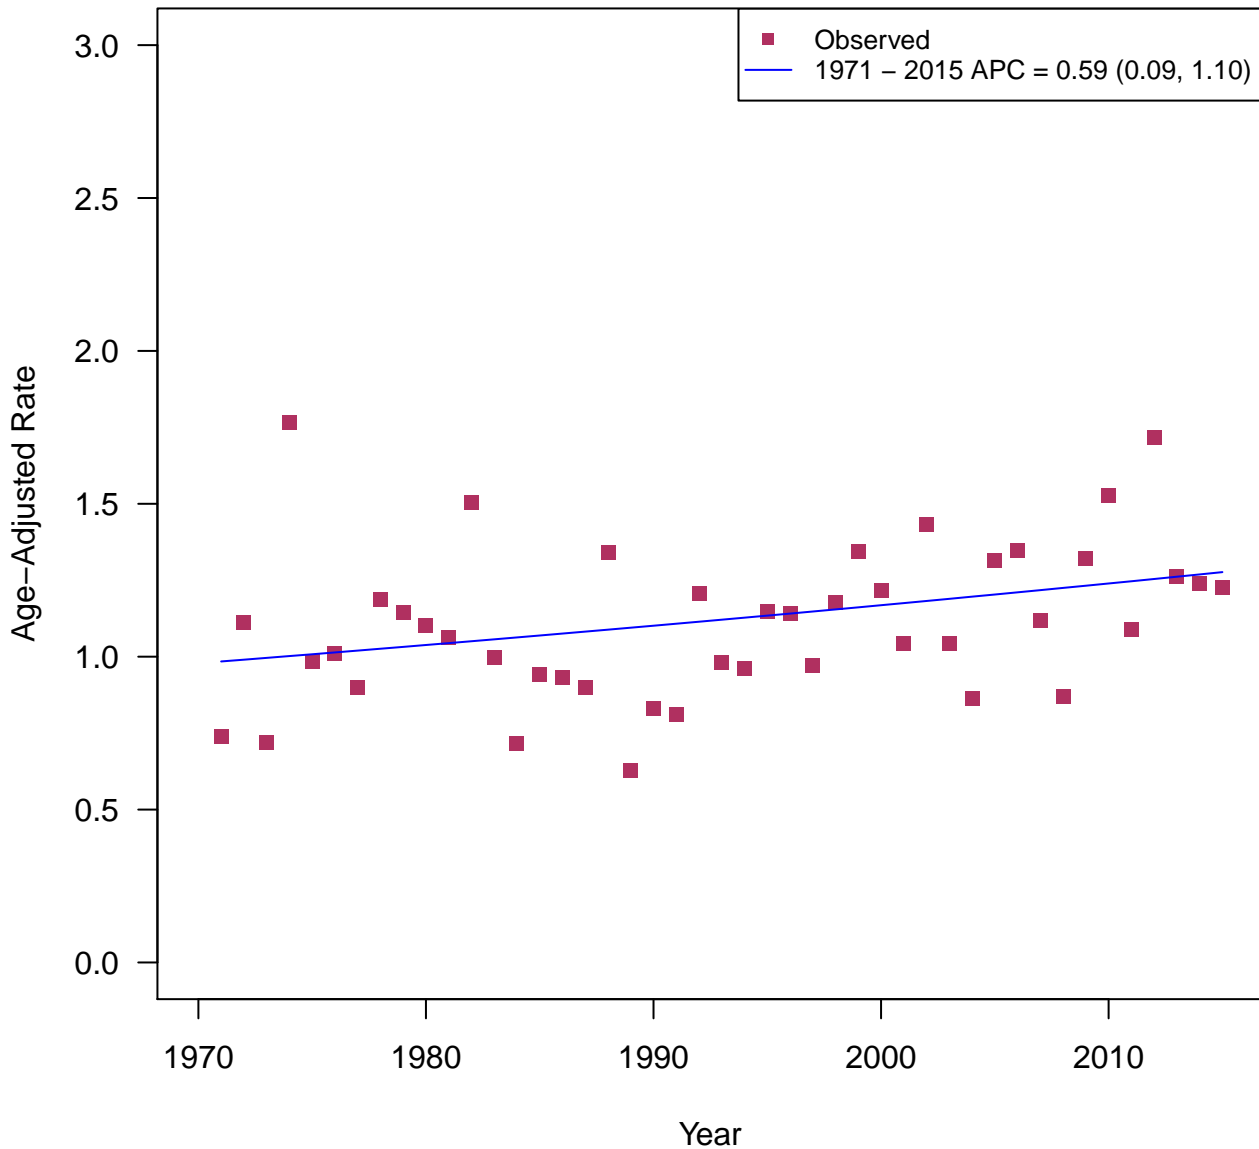

**Figure 19. Age-adjusted incidence rates of acute myeloid leukemia in males aged 40–49 years in Canada, 1971–2015**

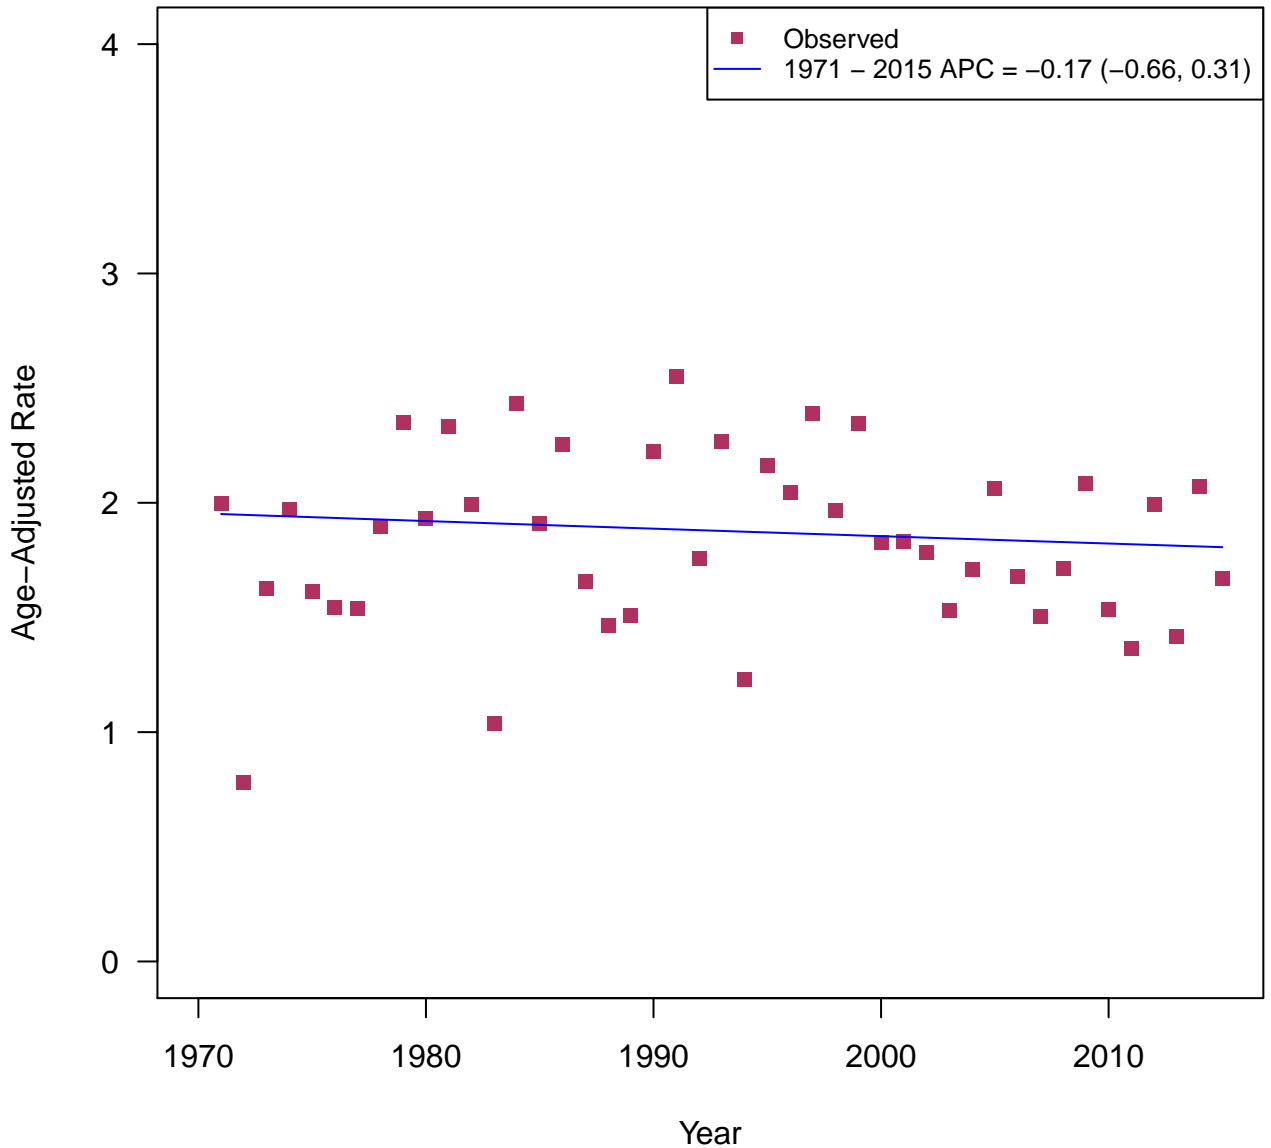



**Figure 20. Age-adjusted incidence rates of acute myeloid leukemia in males aged 50–59 years in Canada, 1971–2015**

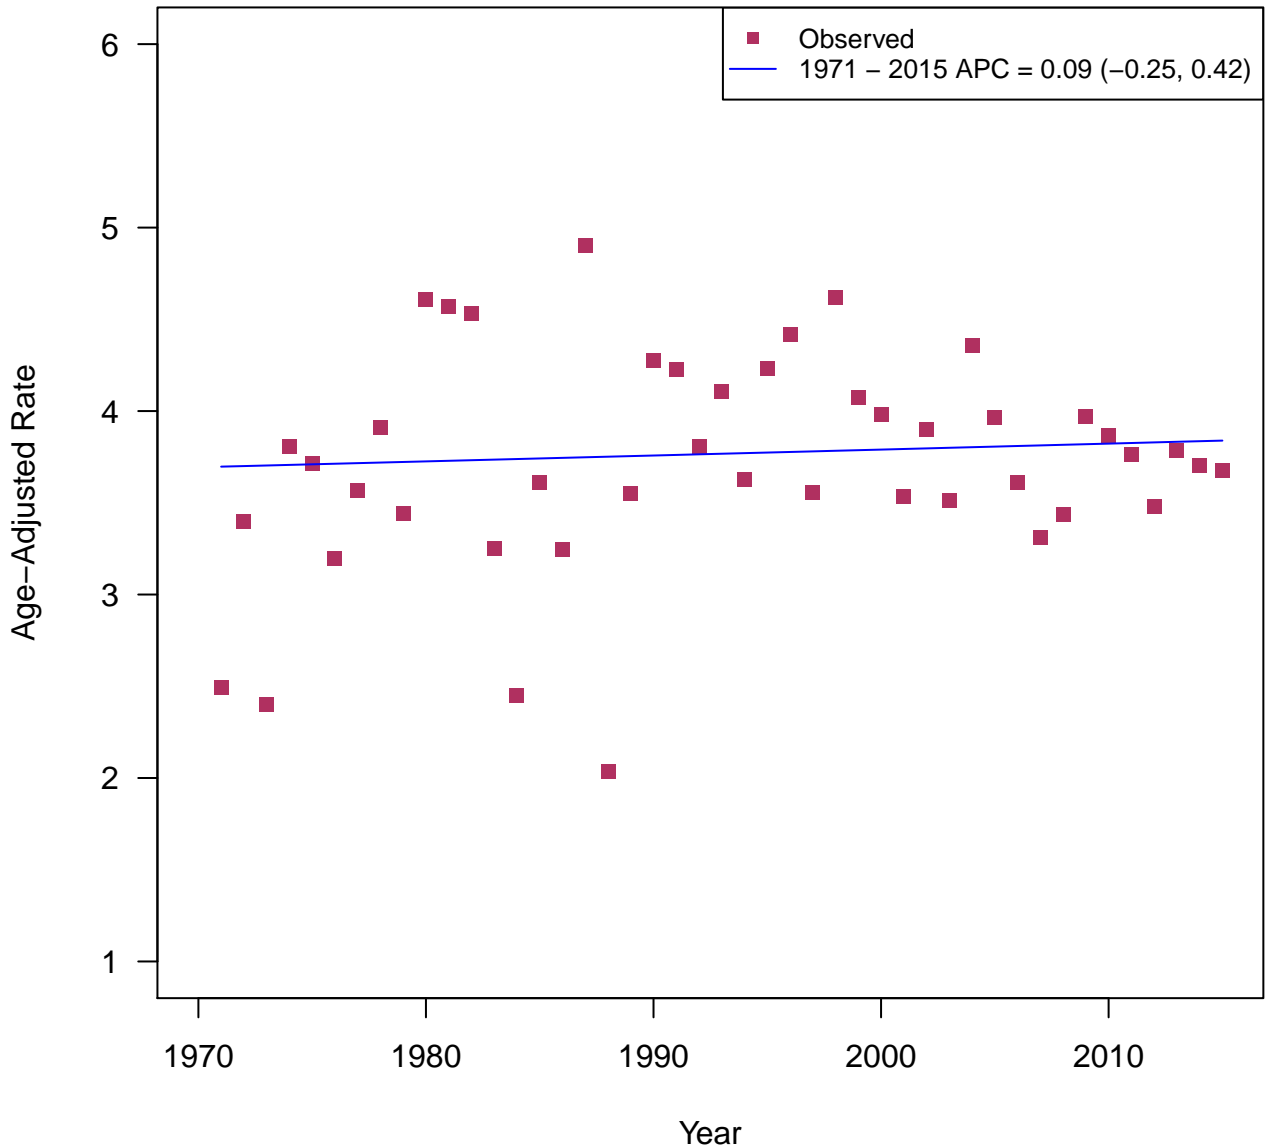

**Figure 21. Age-adjusted incidence rates of acute myeloid leukemia in males aged 60–69 years in Canada, 1971–2015**

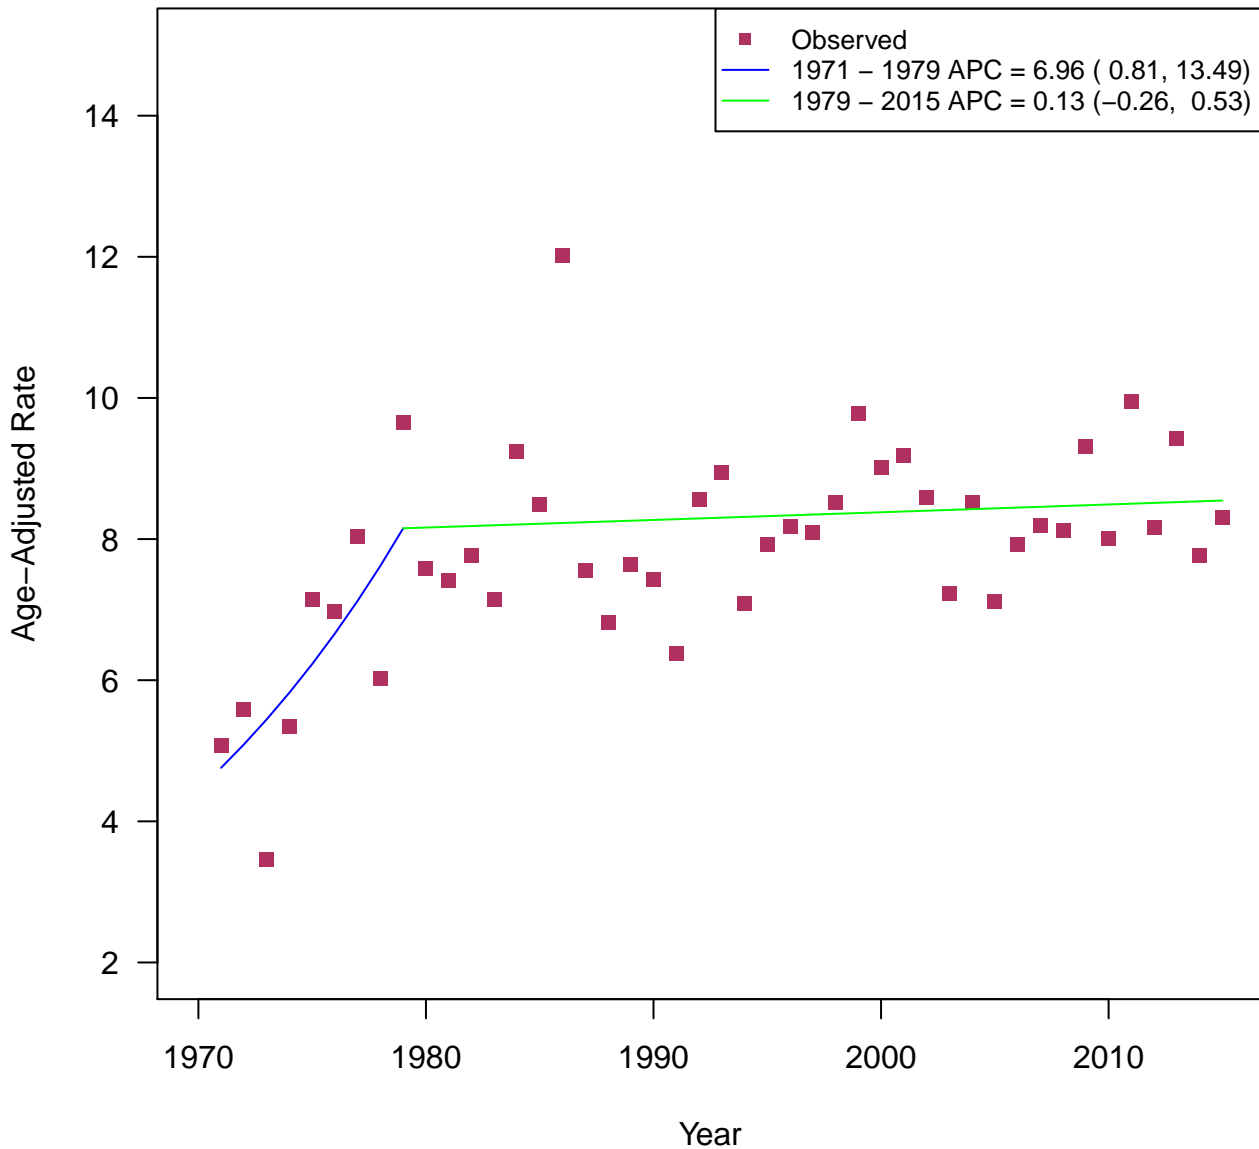

**Figure 22. Age-adjusted incidence rates of acute myeloid leukemia in males aged 70–79 years in Canada, 1971–2015**

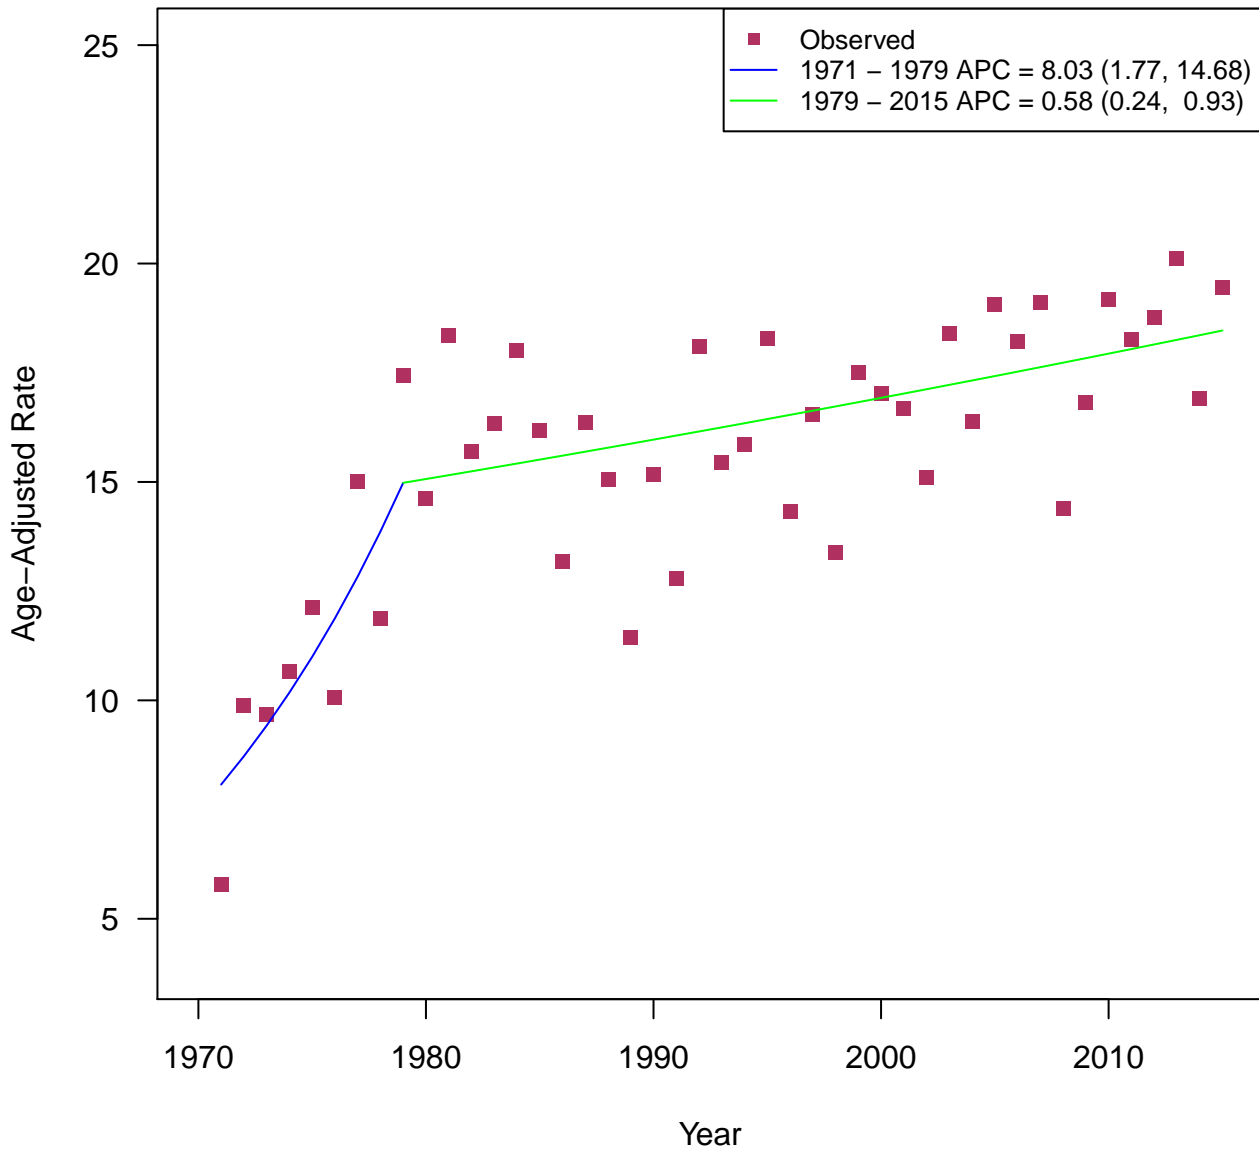

**Figure 23. Age-adjusted incidence rates of acute myeloid leukemia in males aged 80–89 years in Canada, 1971–2015**

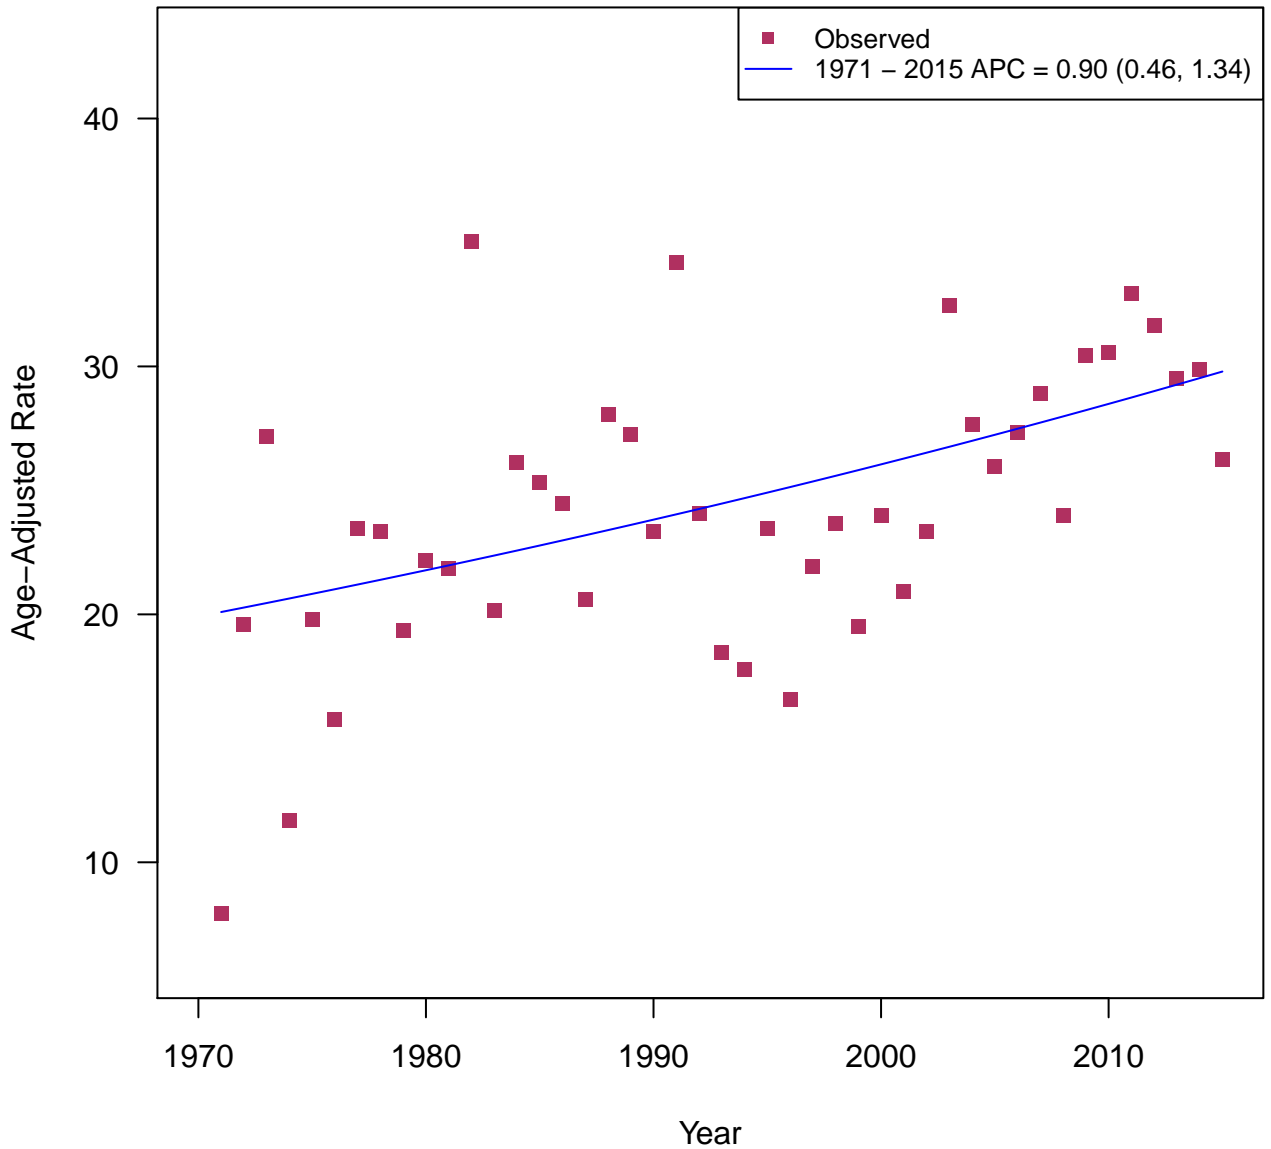

**Figure 24. Age-adjusted incidence rates of acute myeloid leukemia in females aged 20–29 years in Canada, 1971–2015**

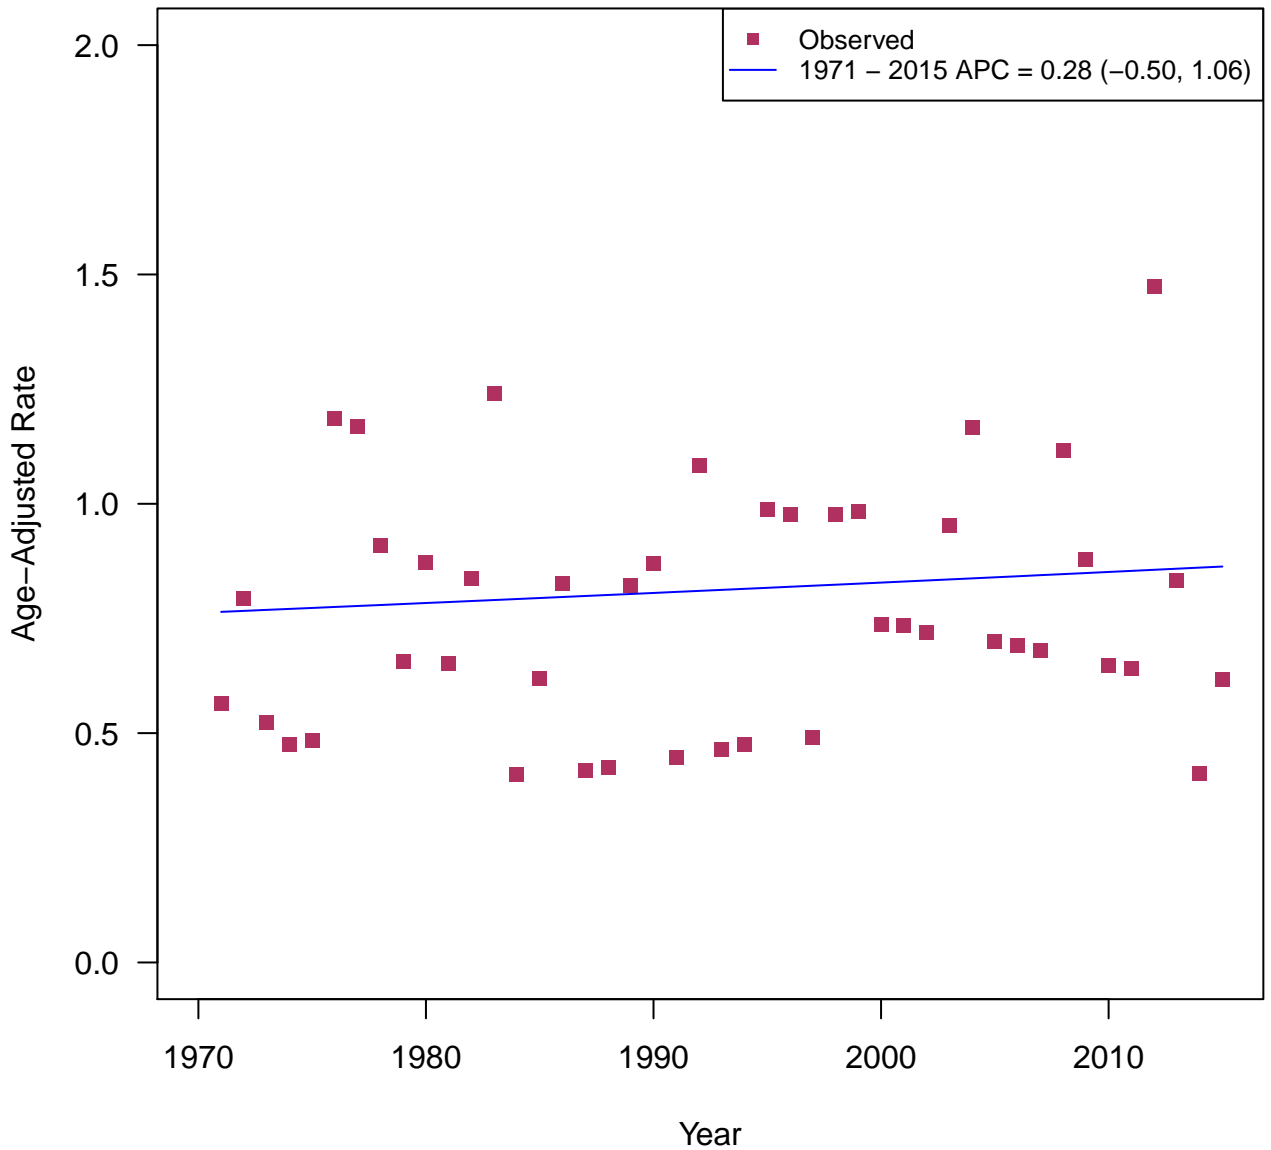

**Figure 25. Age-adjusted incidence rates of acute myeloid leukemia in females aged 20–39 years in Canada, 1971–2015**

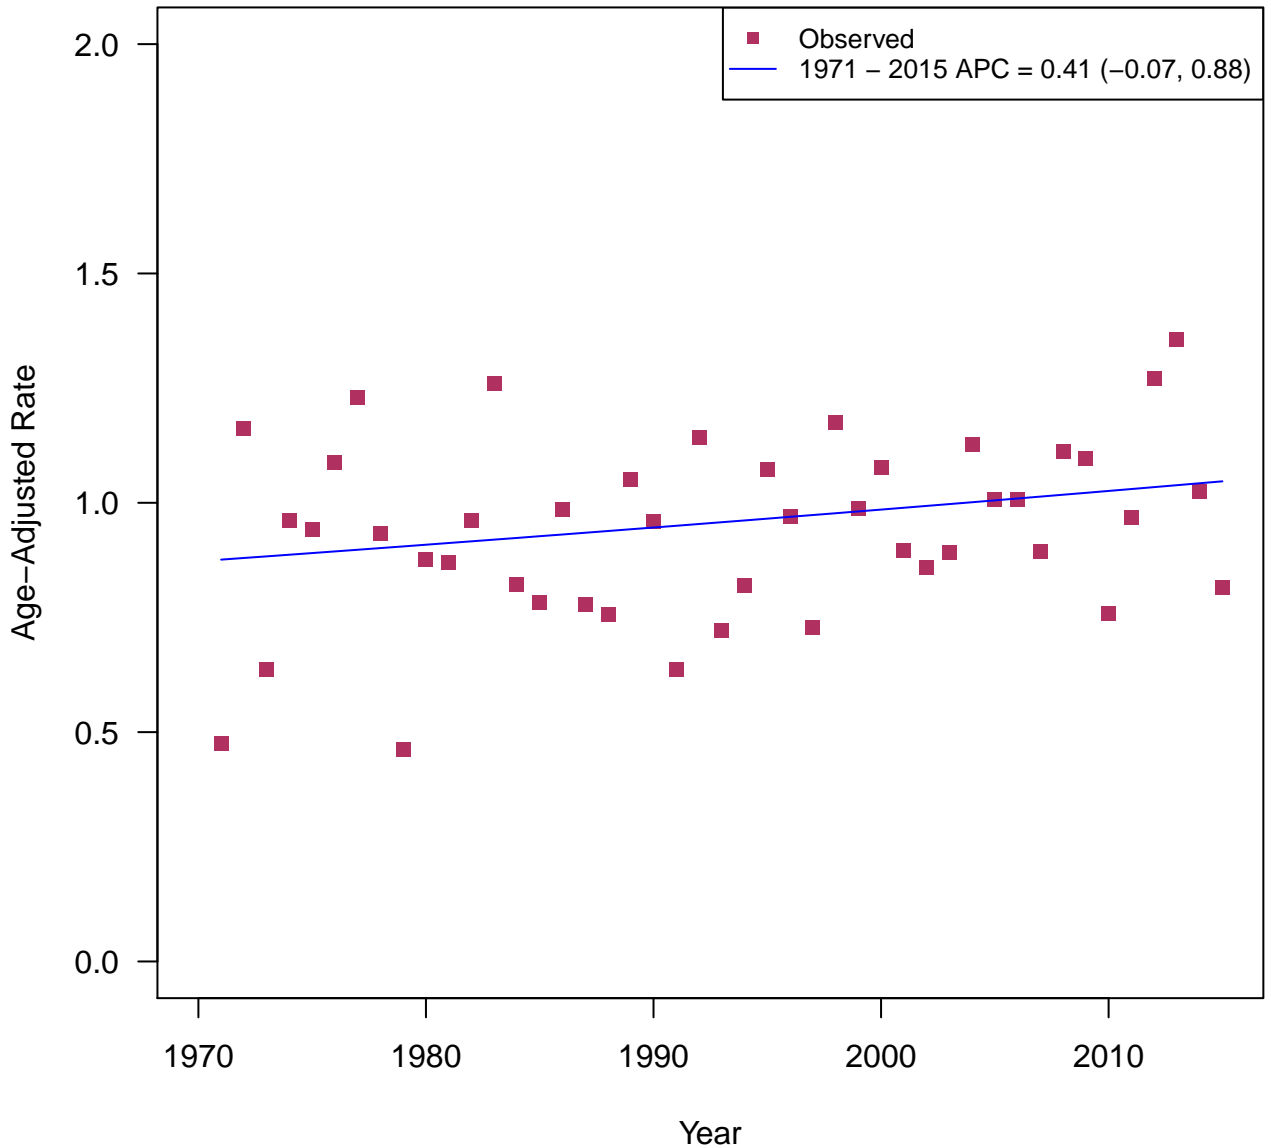

**Figure 26. Age-adjusted incidence rates of acute myeloid leukemia in females aged 30–39 years in Canada, 1971–2015**

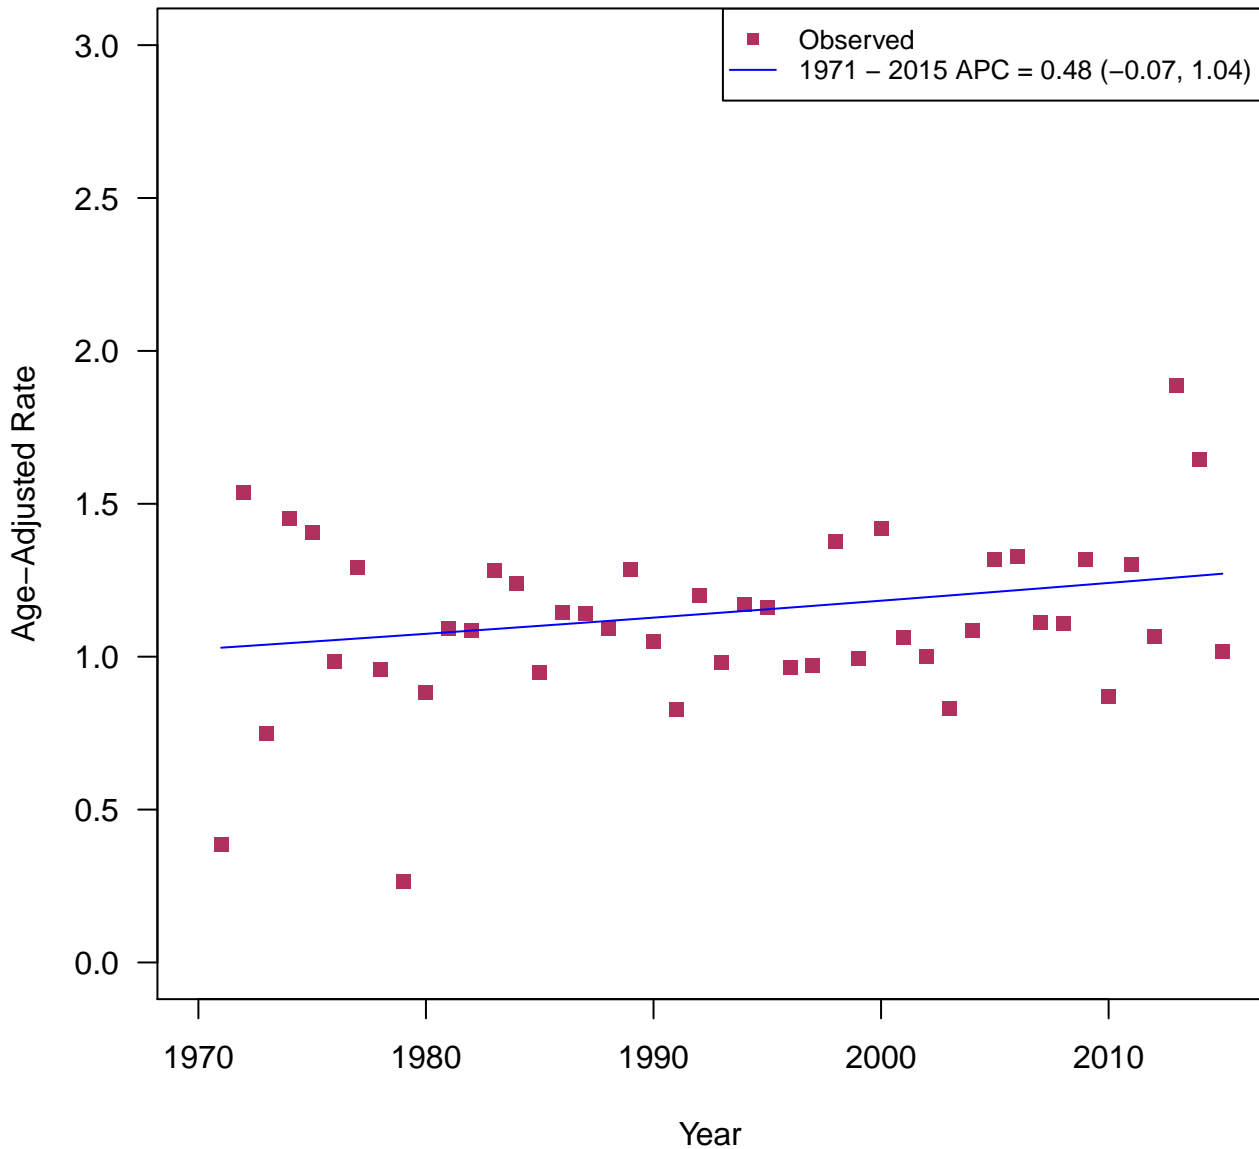

**Figure 27. Age-adjusted incidence rates of acute myeloid leukemia in females aged 40–49 years in Canada, 1971–2015**

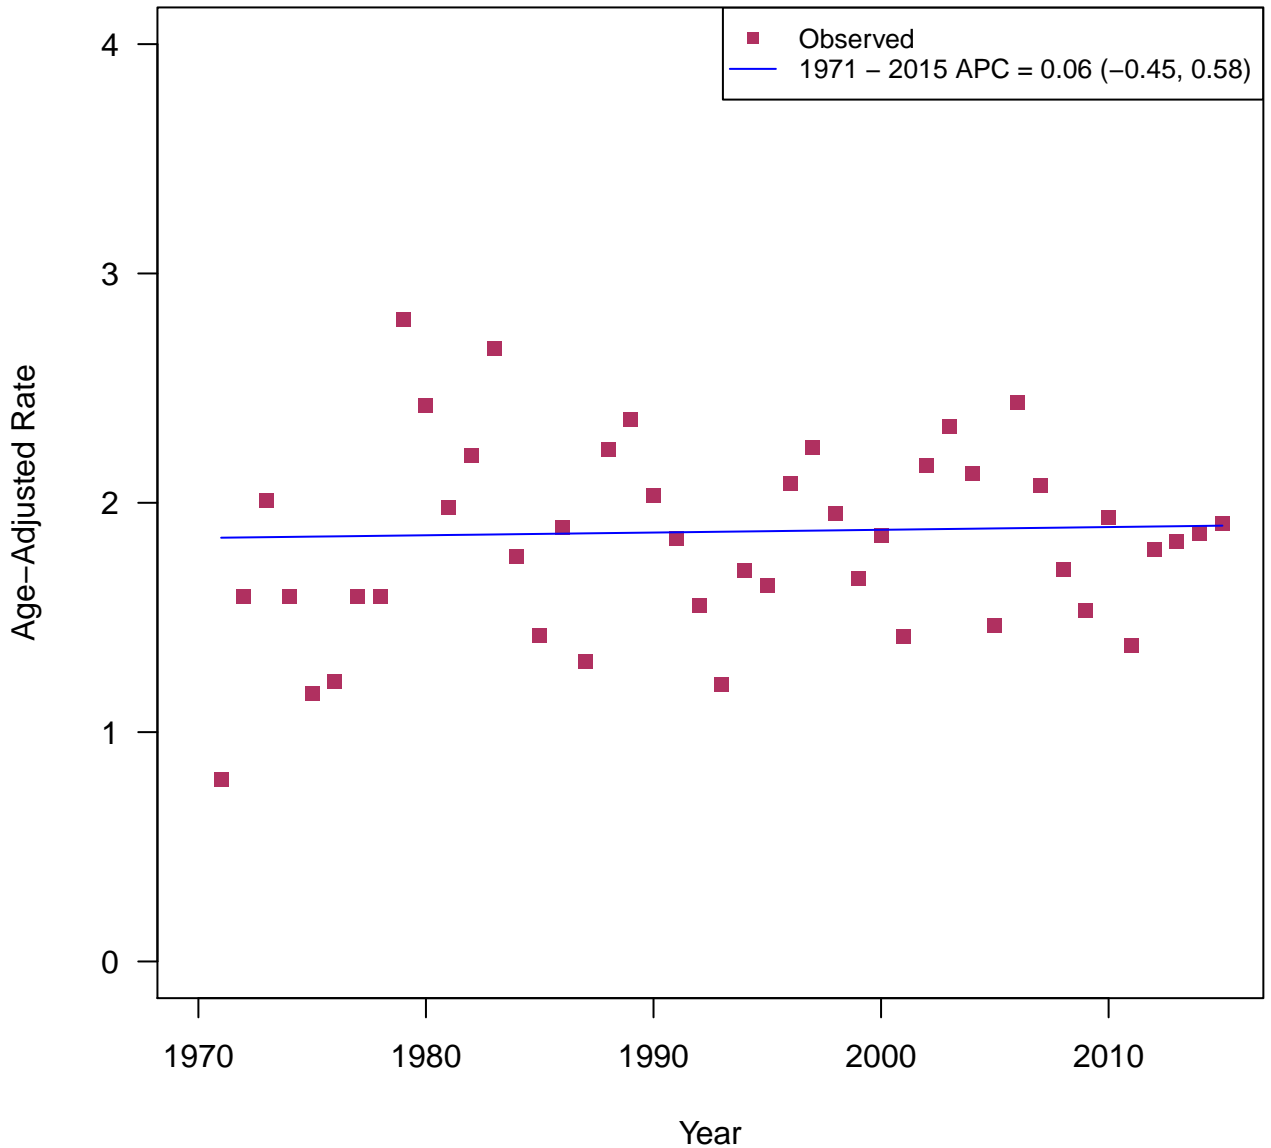



**Figure 28. Age-adjusted incidence rates of acute myeloid leukemia in females aged 50–59 years in Canada, 1971–2015**

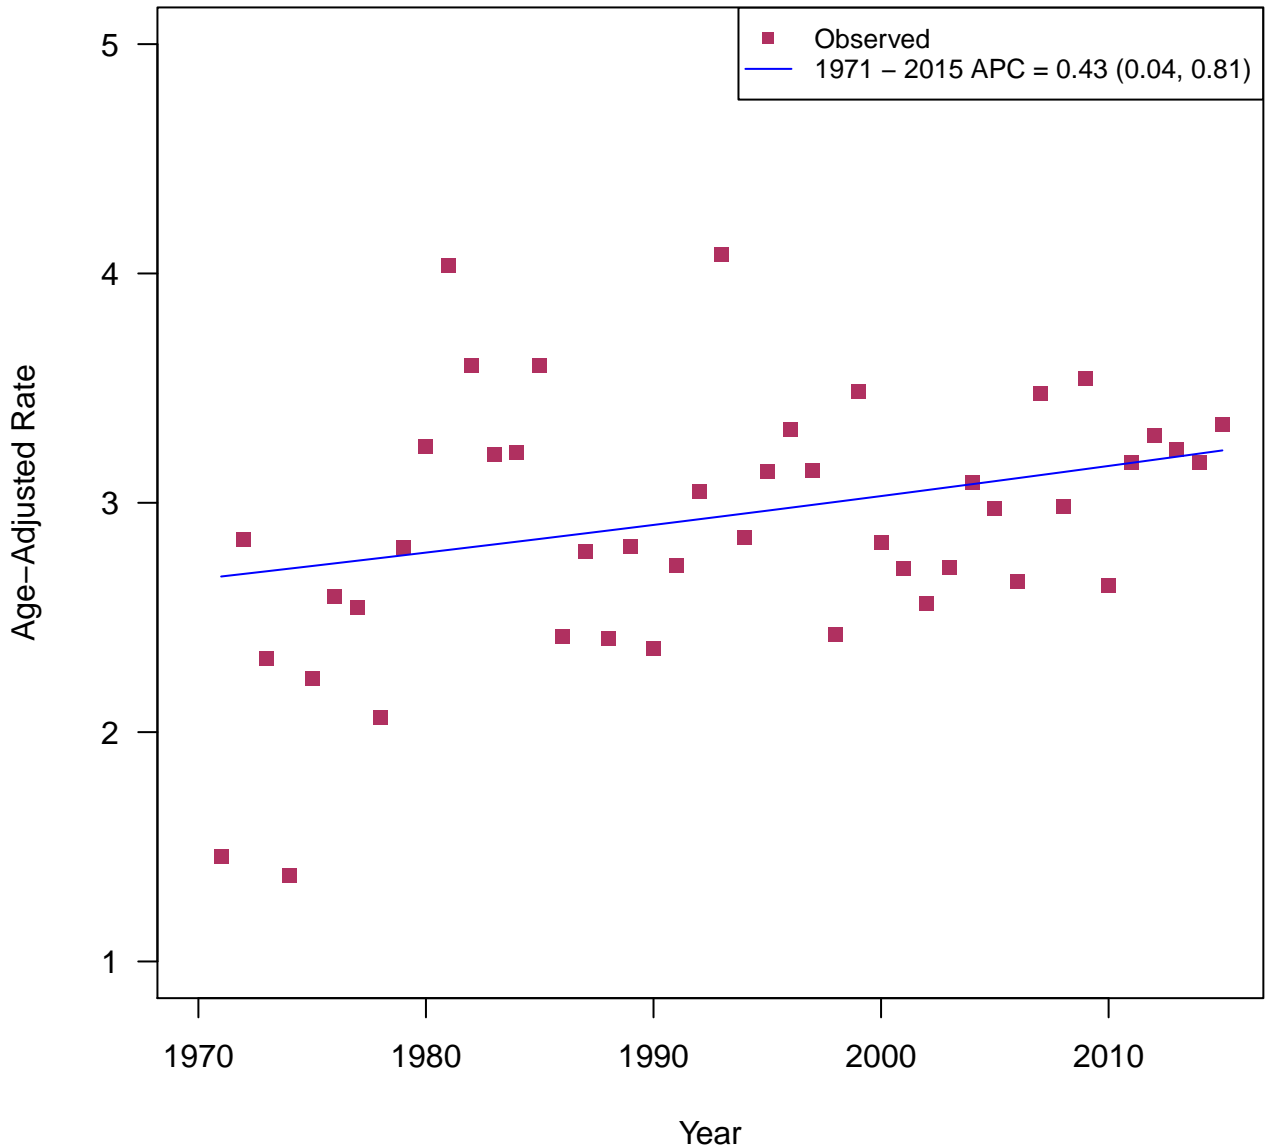

**Figure 29. Age-adjusted incidence rates of acute myeloid leukemia in females aged 60–69 years in Canada, 1971–2015**

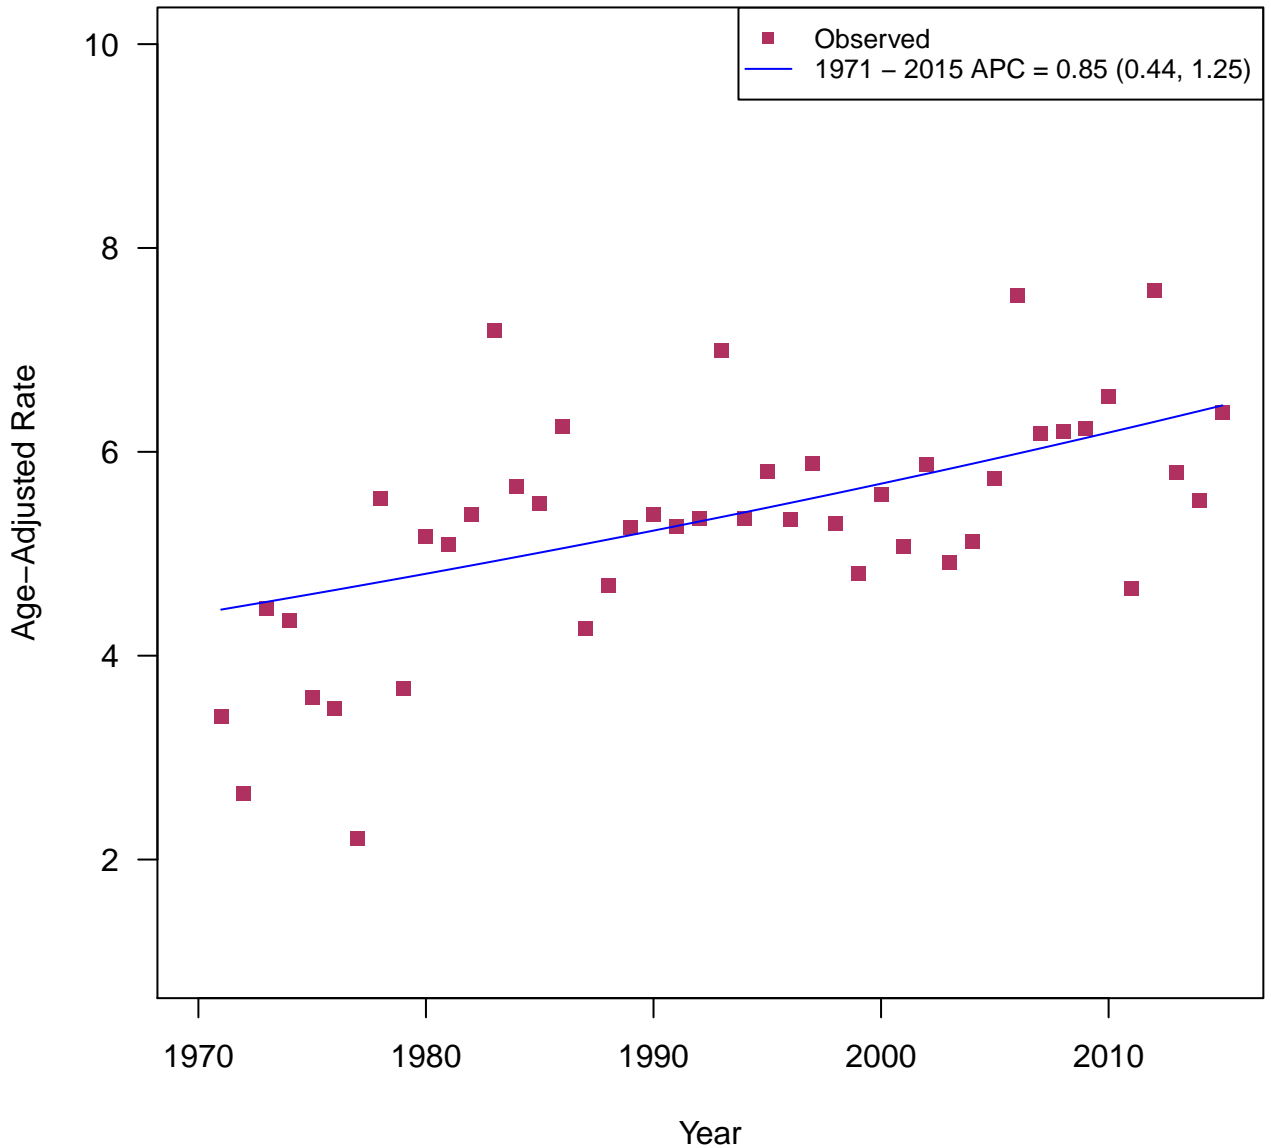

**Figure 30. Age-adjusted incidence rates of acute myeloid leukemia in females aged 70–79 years in Canada, 1971–2015**

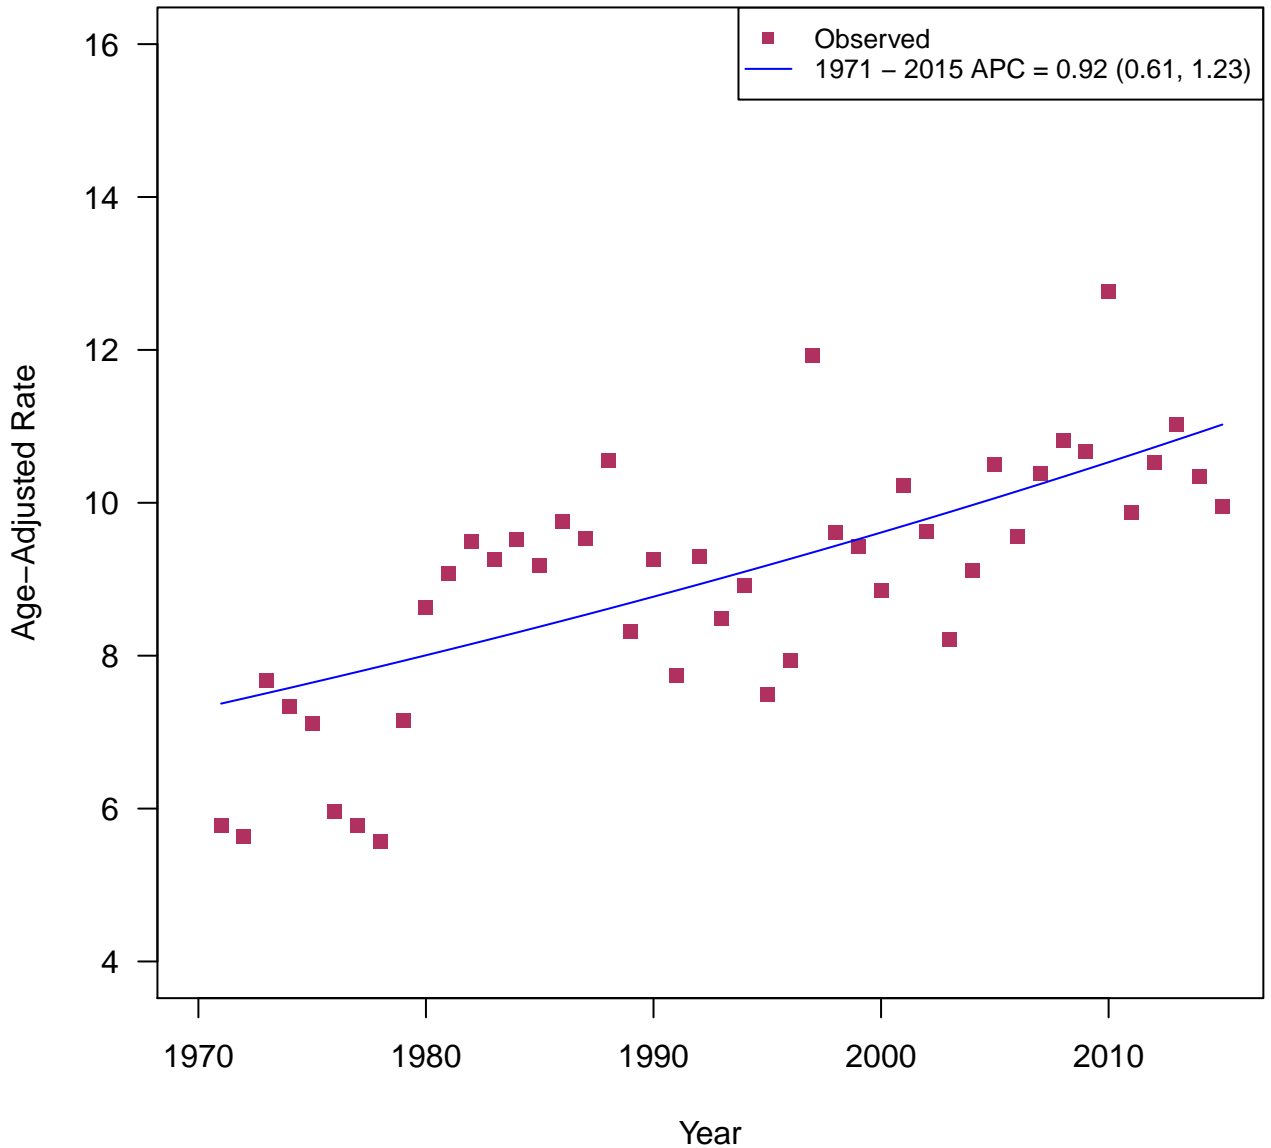

**Figure 31. Age-adjusted incidence rates of acute myeloid leukemia in females aged 80–89 years in Canada, 1971–2015**

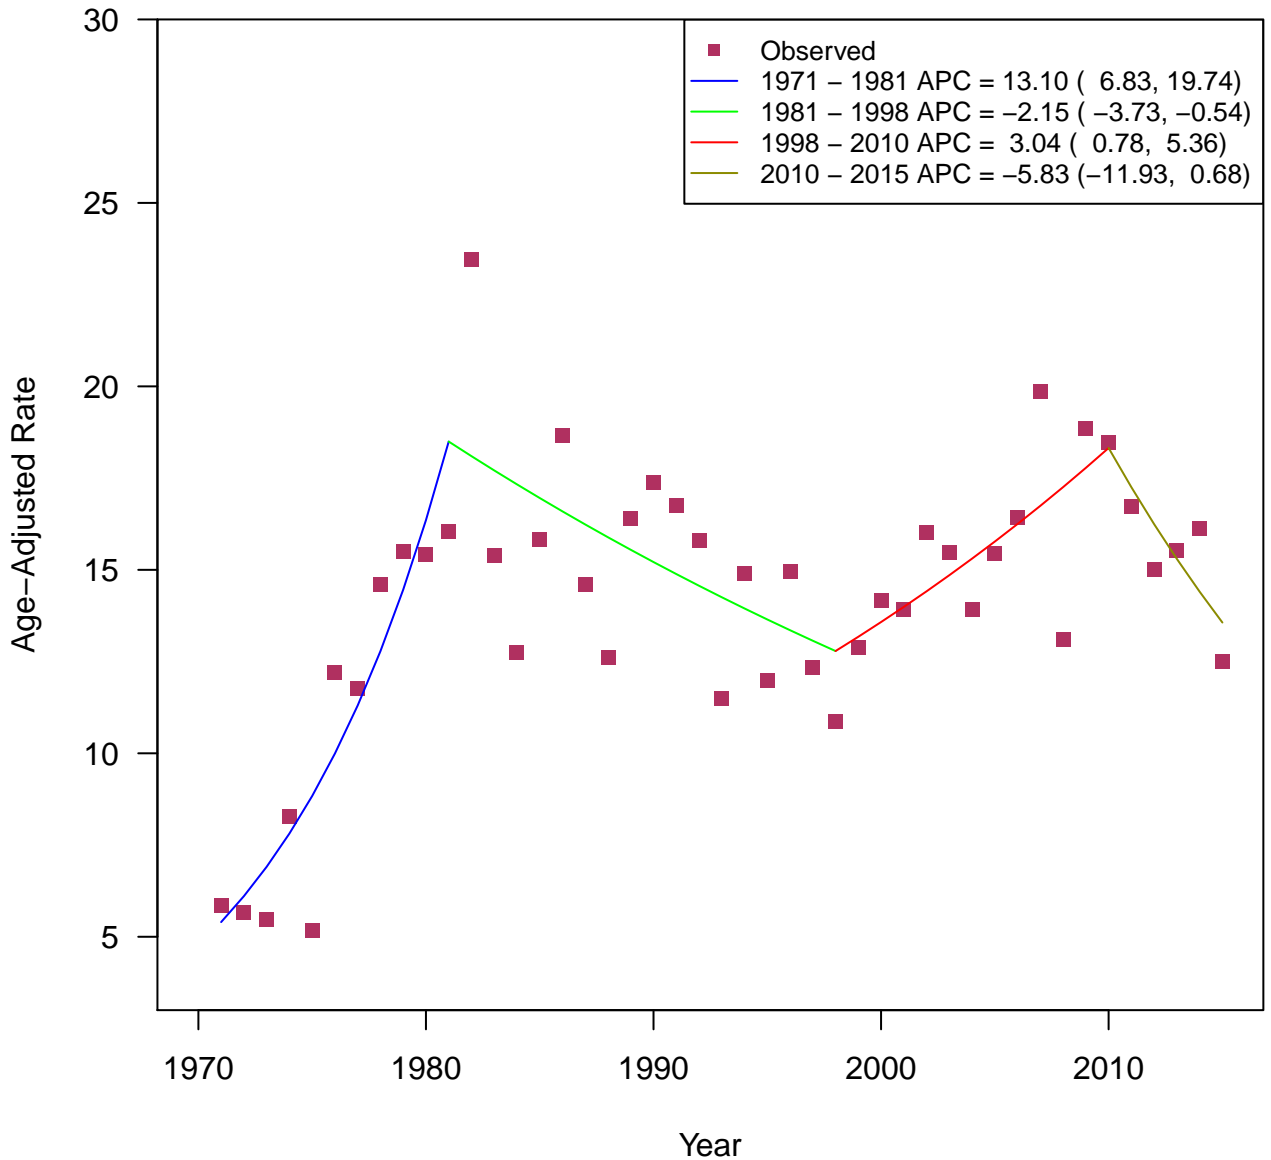

**Figure 32. Age-adjusted incidence rates of anal cancer in males aged 20–29 years in Canada, 1971–2015**

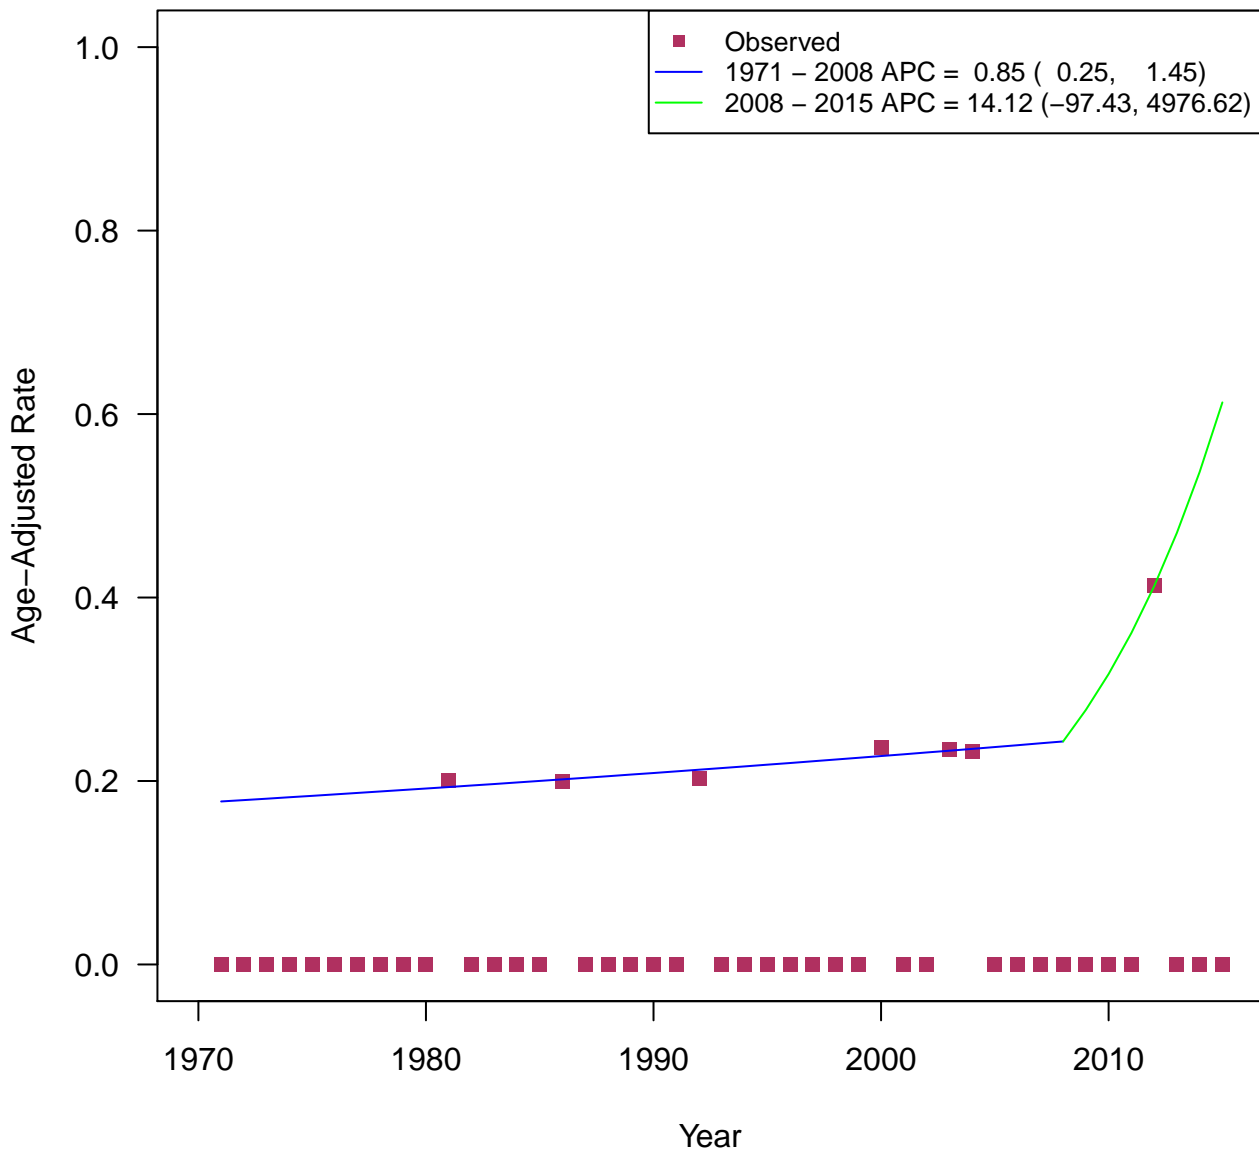

**Figure 33. Age-adjusted incidence rates of anal cancer in males aged 20–39 years in Canada, 1971–2015**

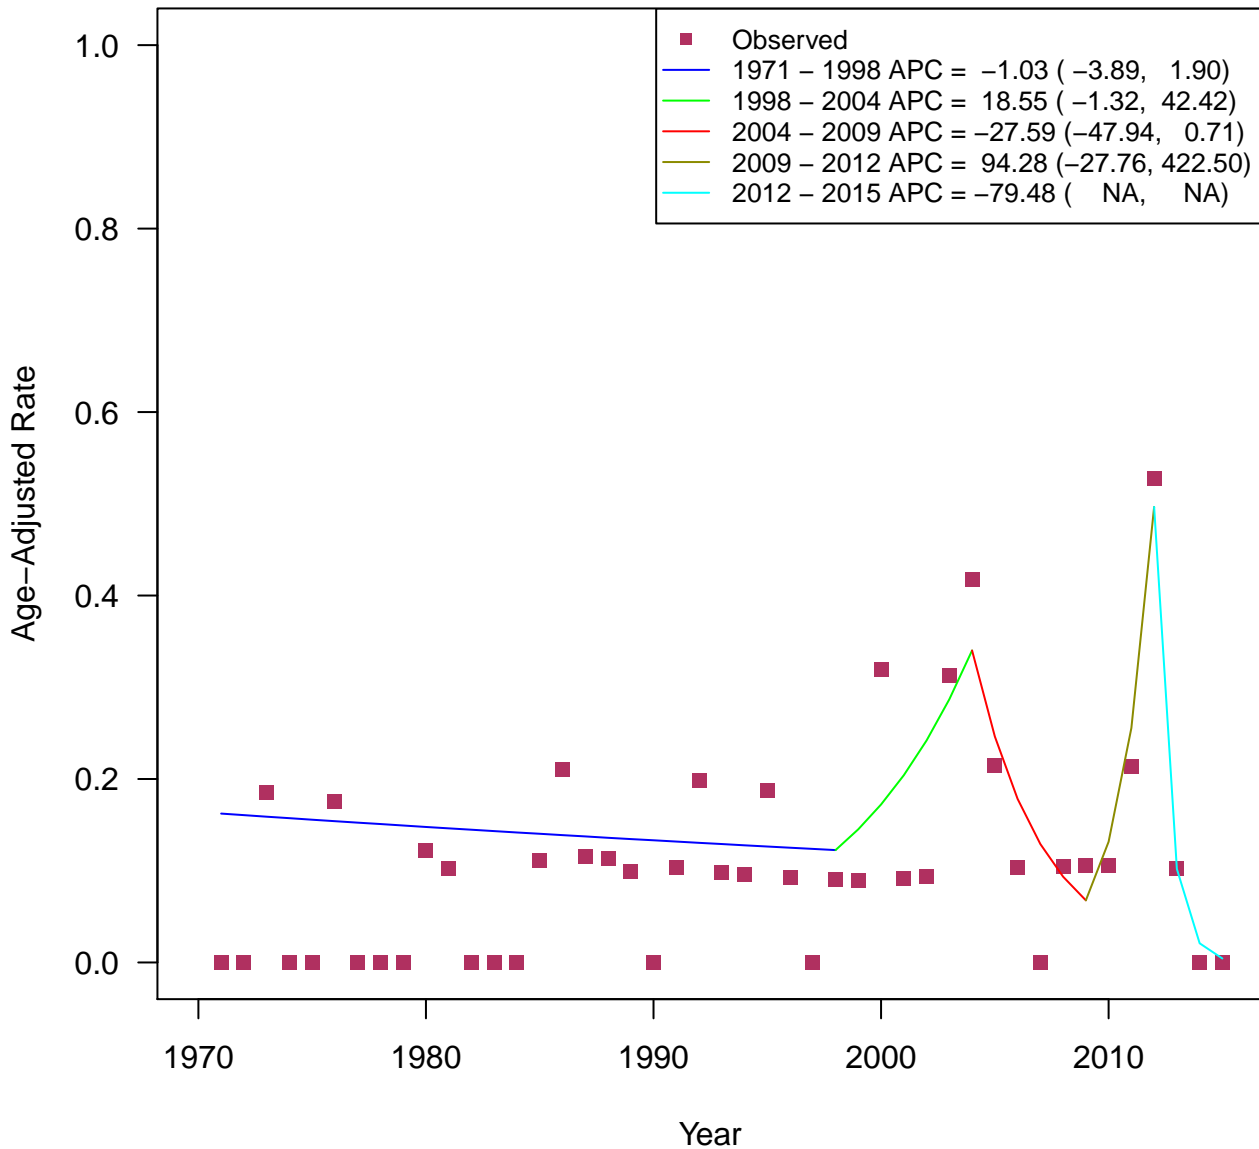

**Figure 34. Age-adjusted incidence rates of anal cancer in males aged 20–49 years in Canada, 1971–2015**

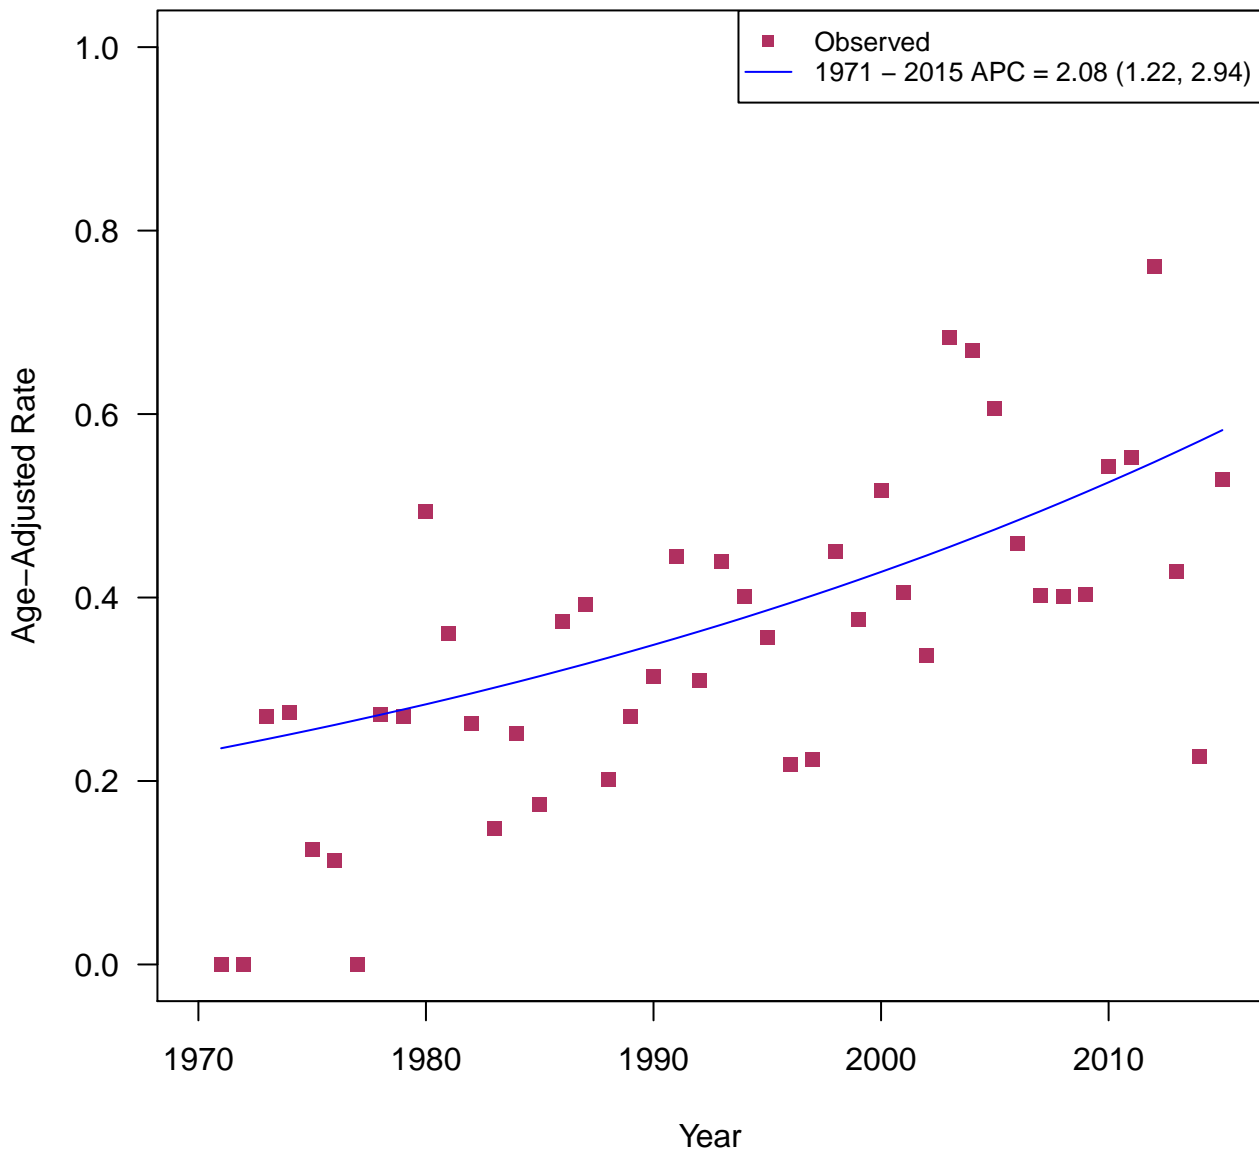

**Figure 35. Age-adjusted incidence rates of anal cancer in males aged 30–39 years in Canada, 1971–2015**

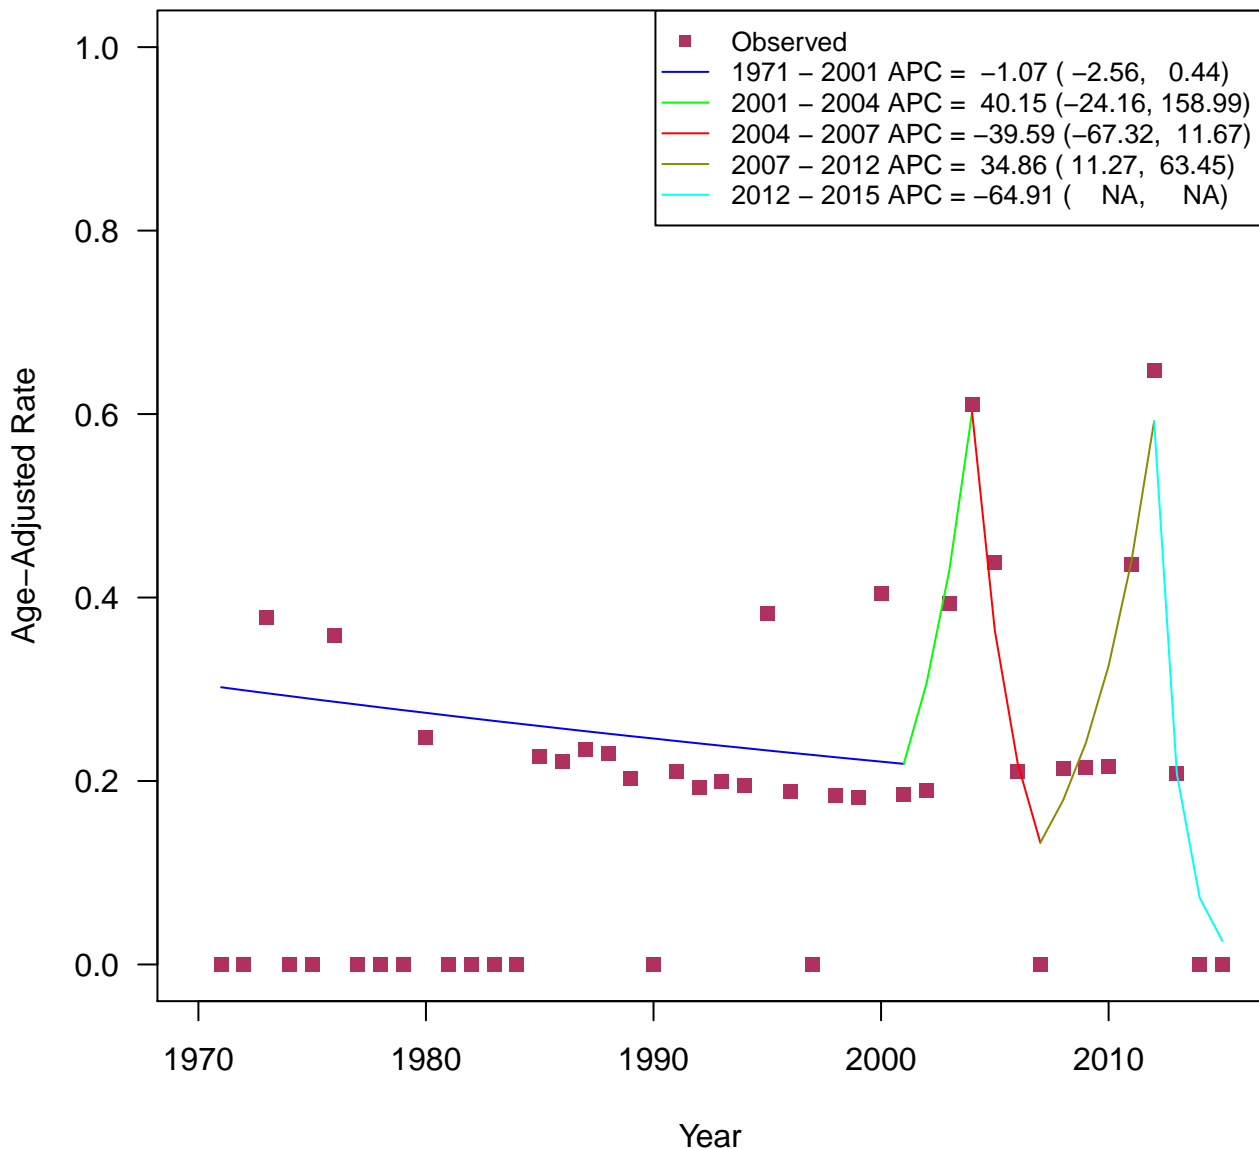



**Figure 36. Age-adjusted incidence rates of anal cancer in males aged 40–49 years in Canada, 1971–2015**

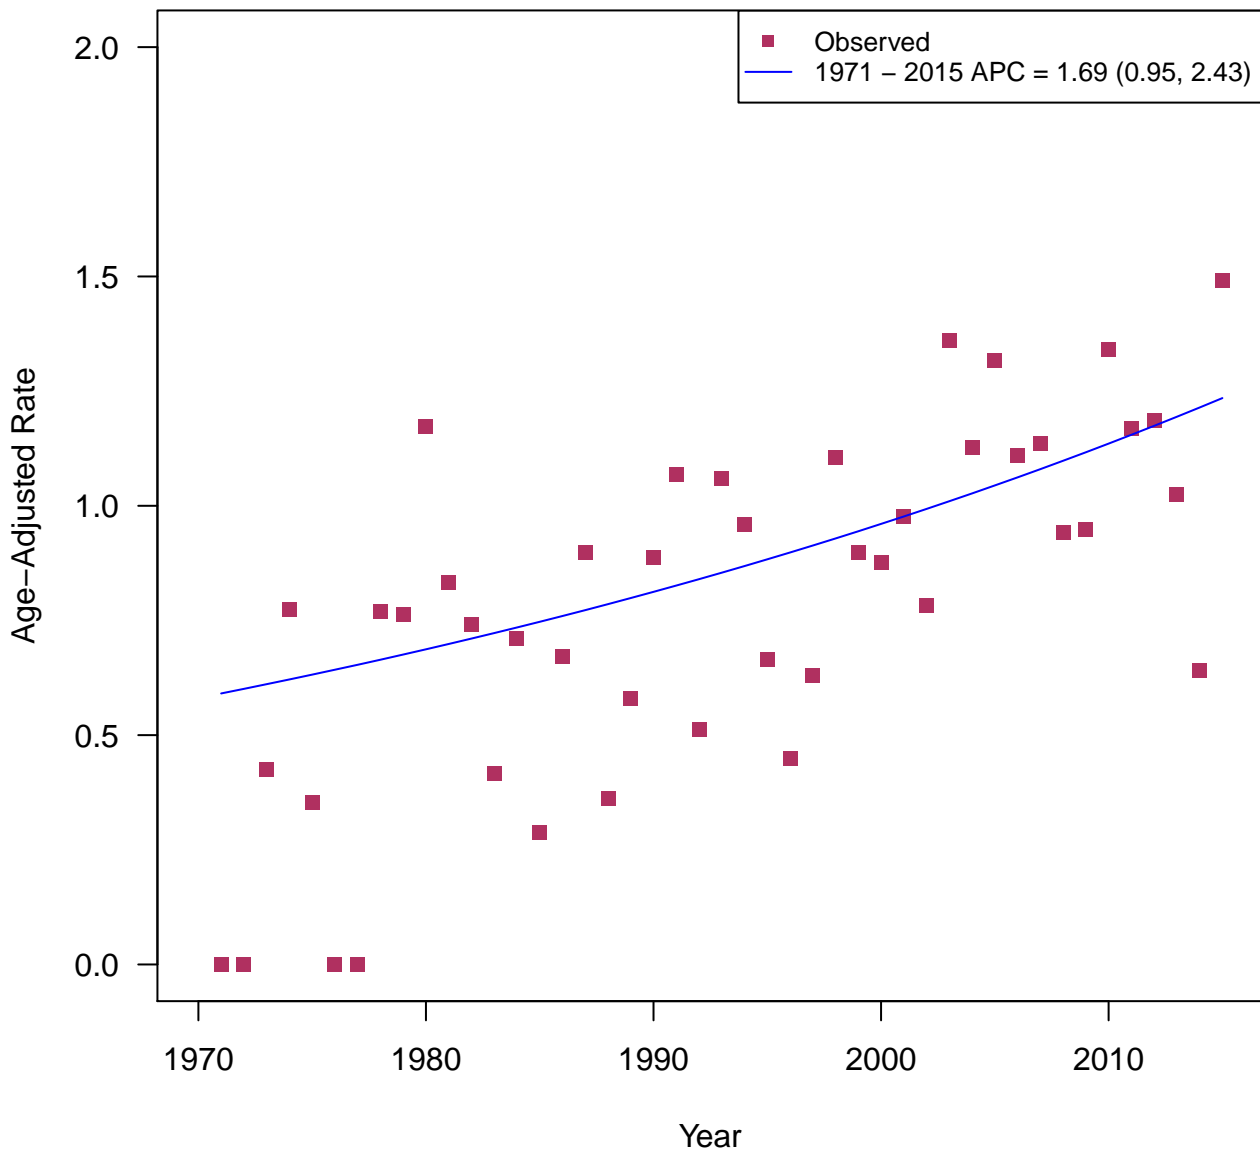

**Figure 37. Age-adjusted incidence rates of anal cancer in males aged 50–59 years in Canada, 1971–2015**

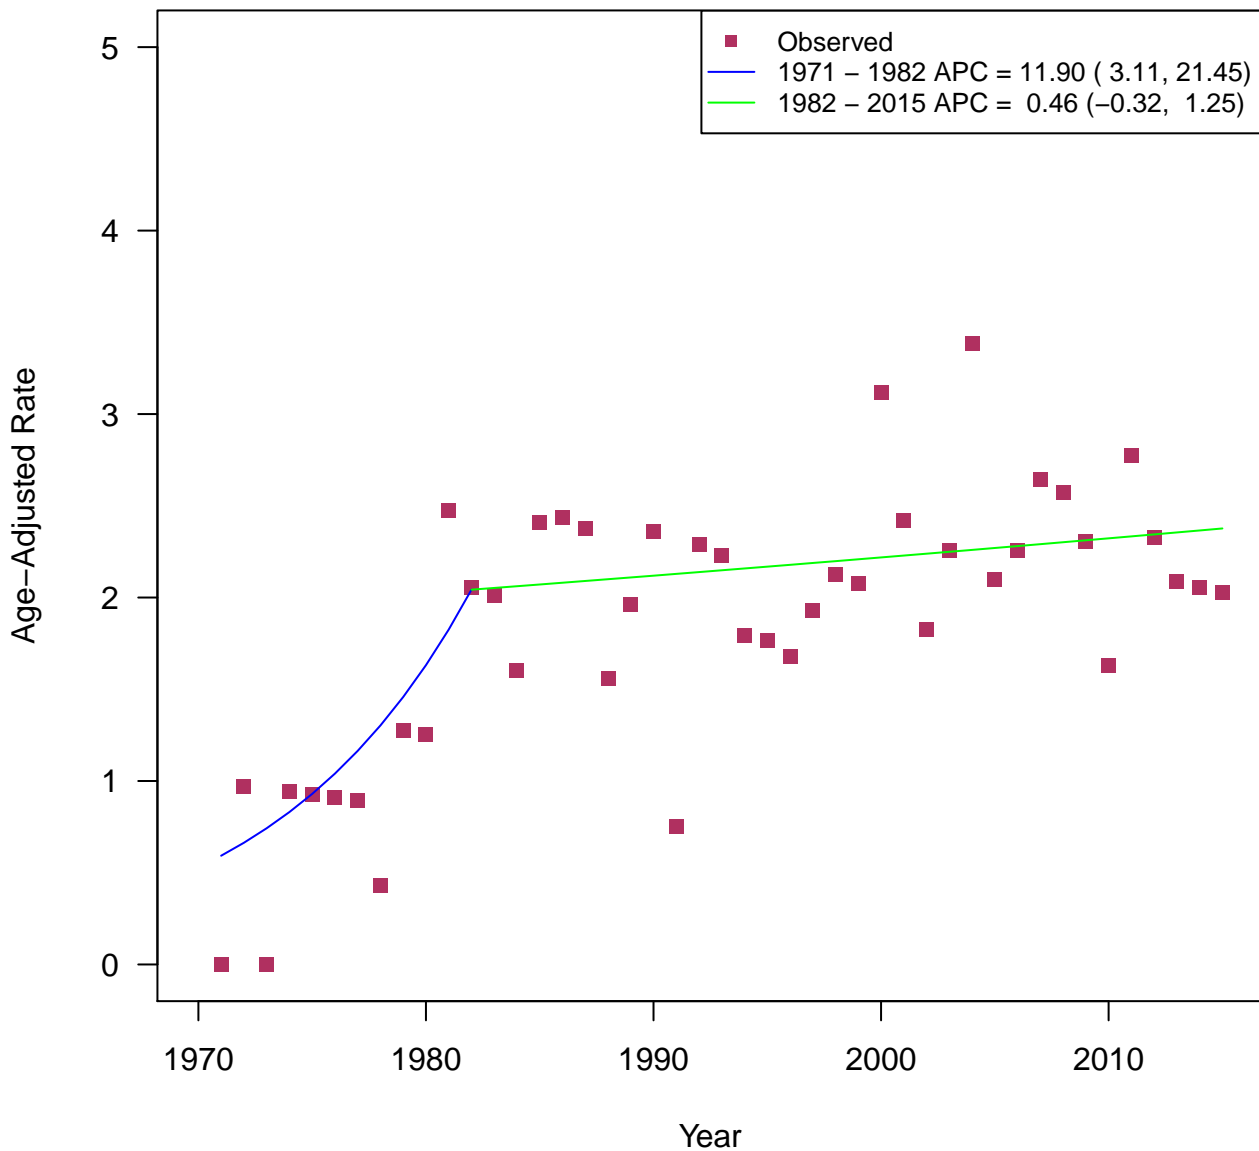

**Figure 38. Age-adjusted incidence rates of anal cancer in males aged 60–69 years in Canada, 1971–2015**

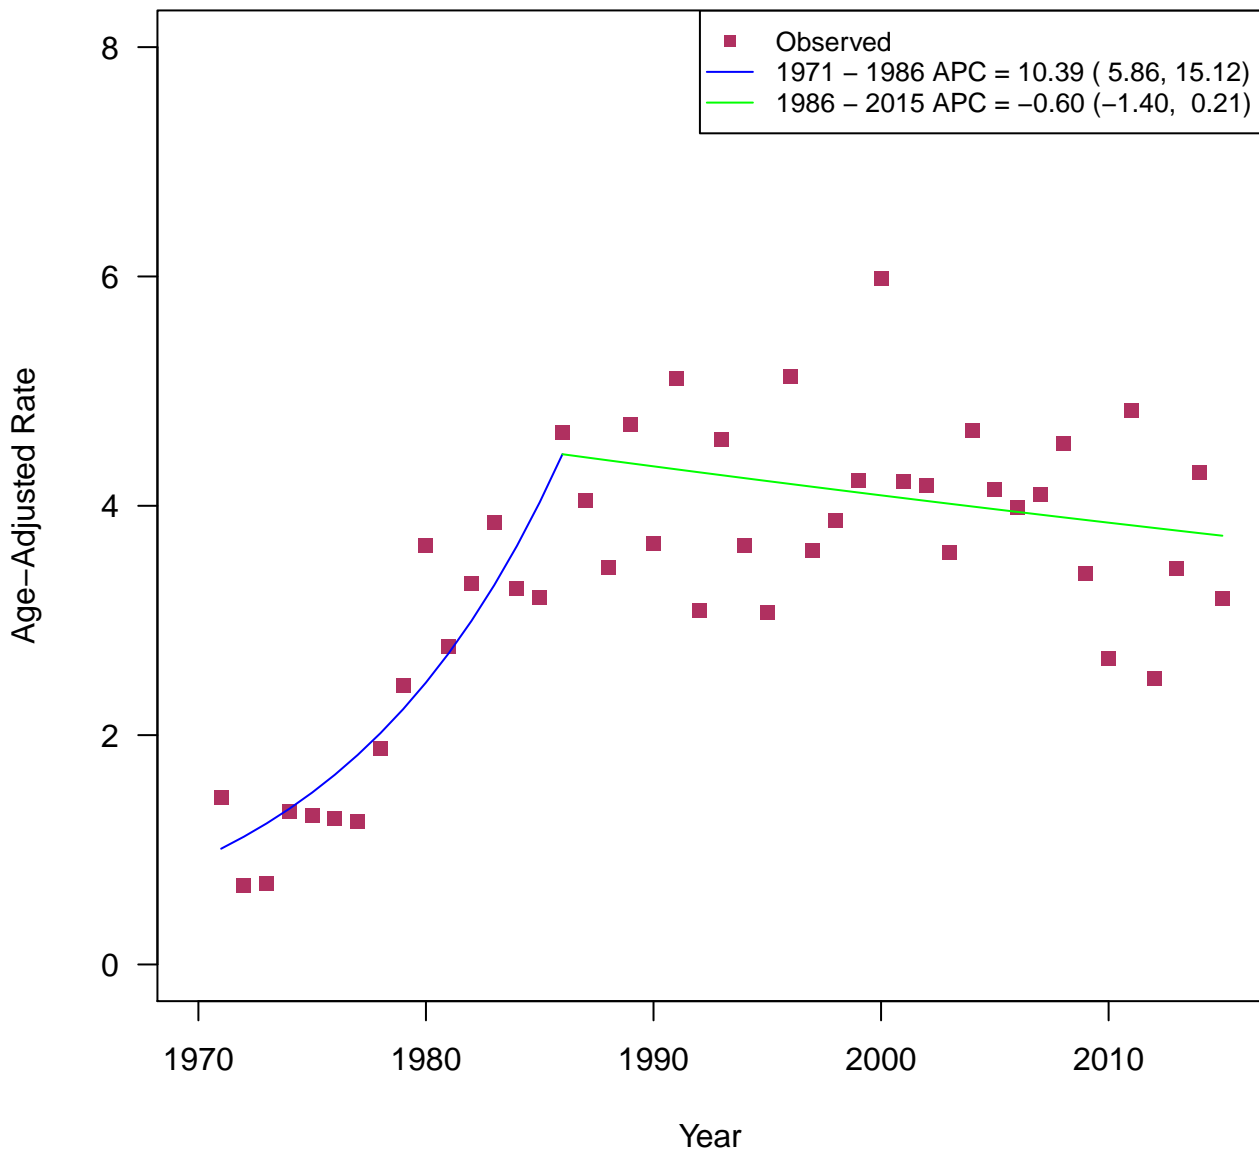

**Figure 39. Age-adjusted incidence rates of anal cancer in males aged 70–79 years in Canada, 1971–2015**

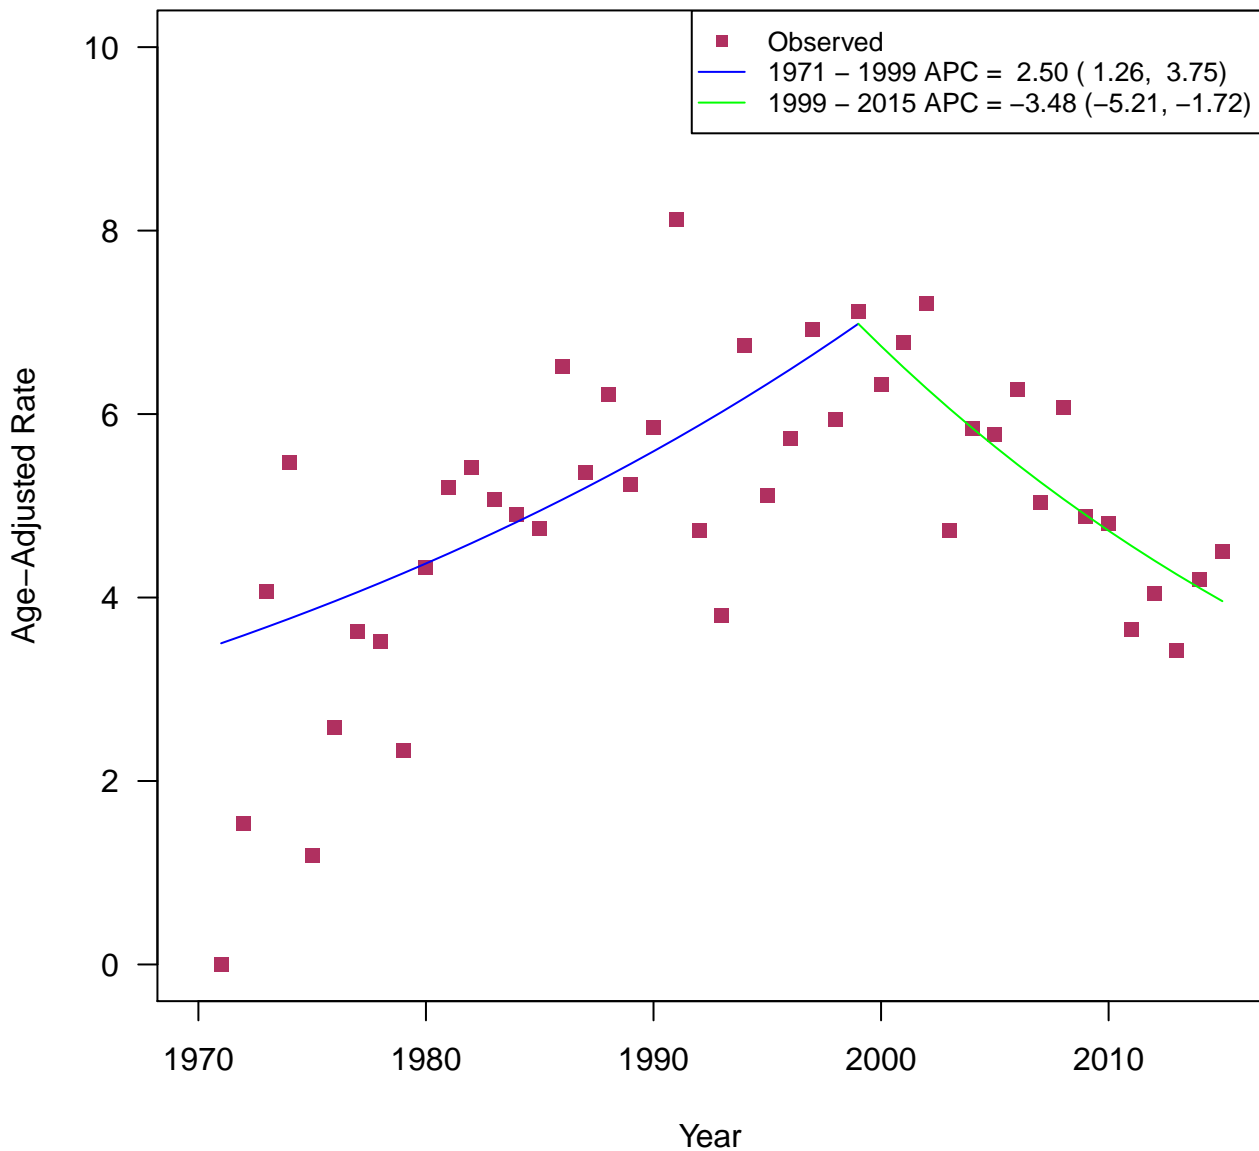

**Figure 40. Age-adjusted incidence rates of anal cancer in males aged 80–89 years in Canada, 1971–2015**

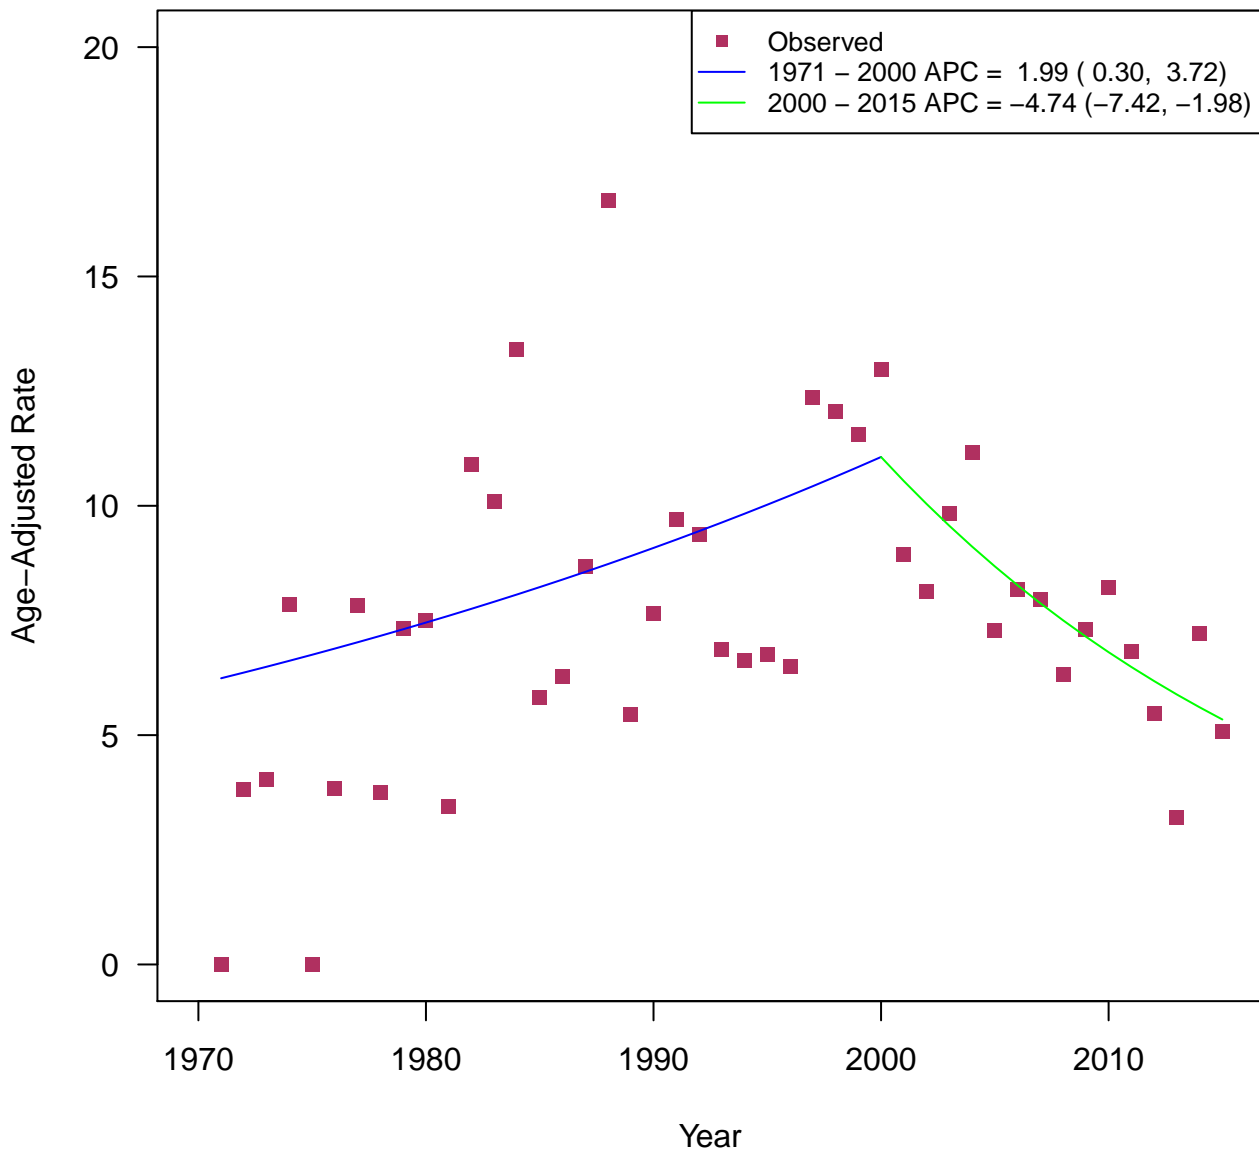

**Figure 41. Age-adjusted incidence rates of anal cancer in females aged 20–29 years in Canada, 1971–2015**

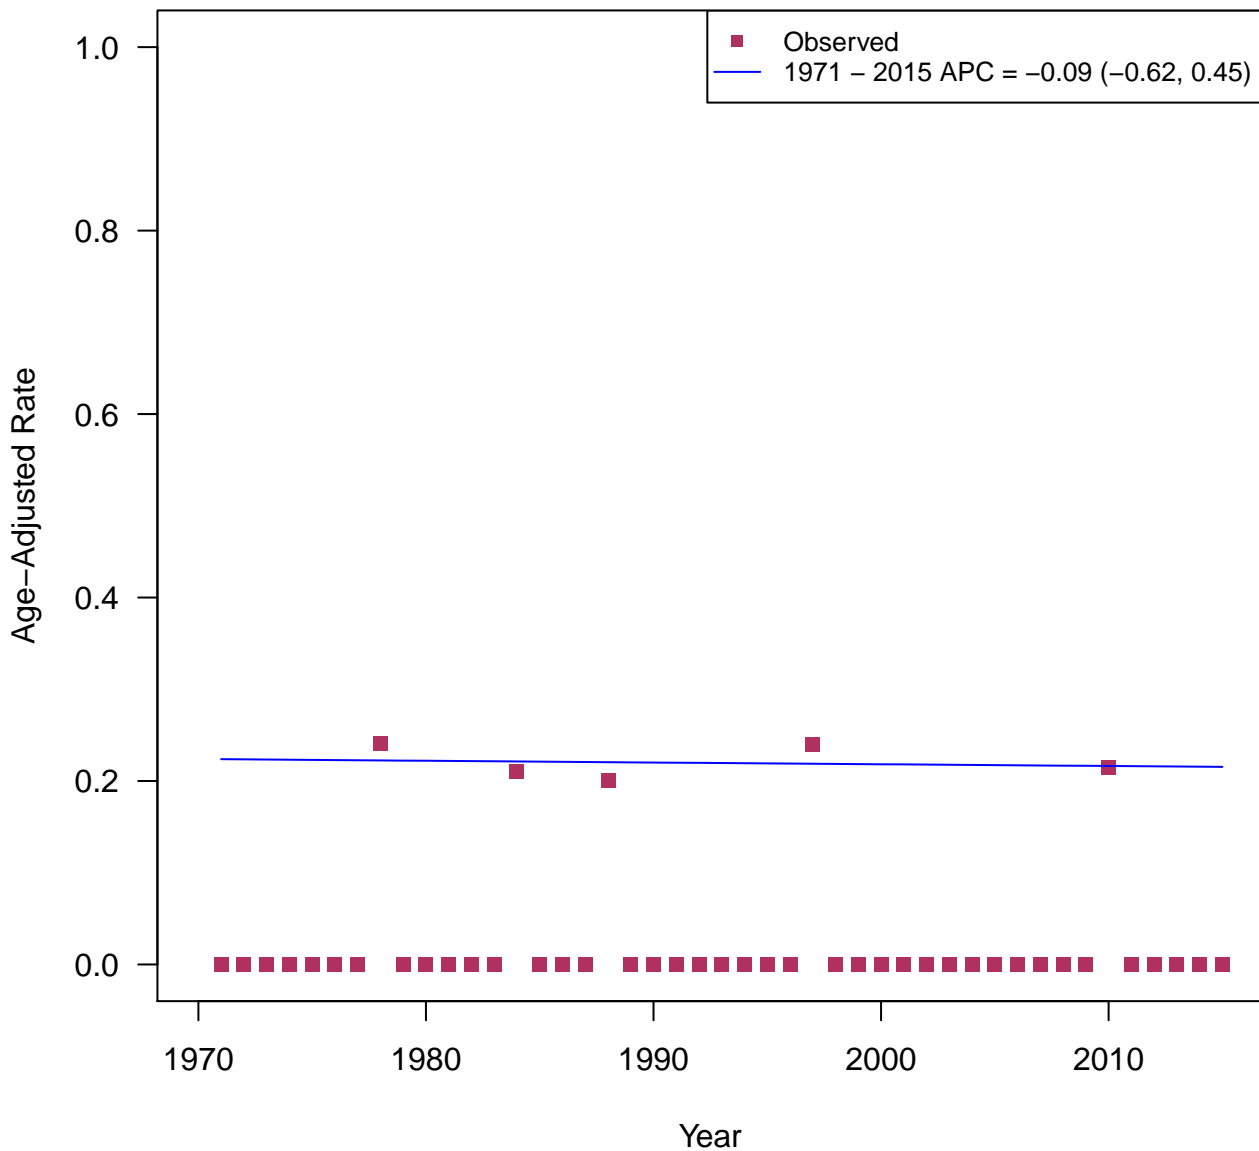

**Figure 42. Age-adjusted incidence rates of anal cancer in females aged 20–39 years in Canada, 1971–2015**

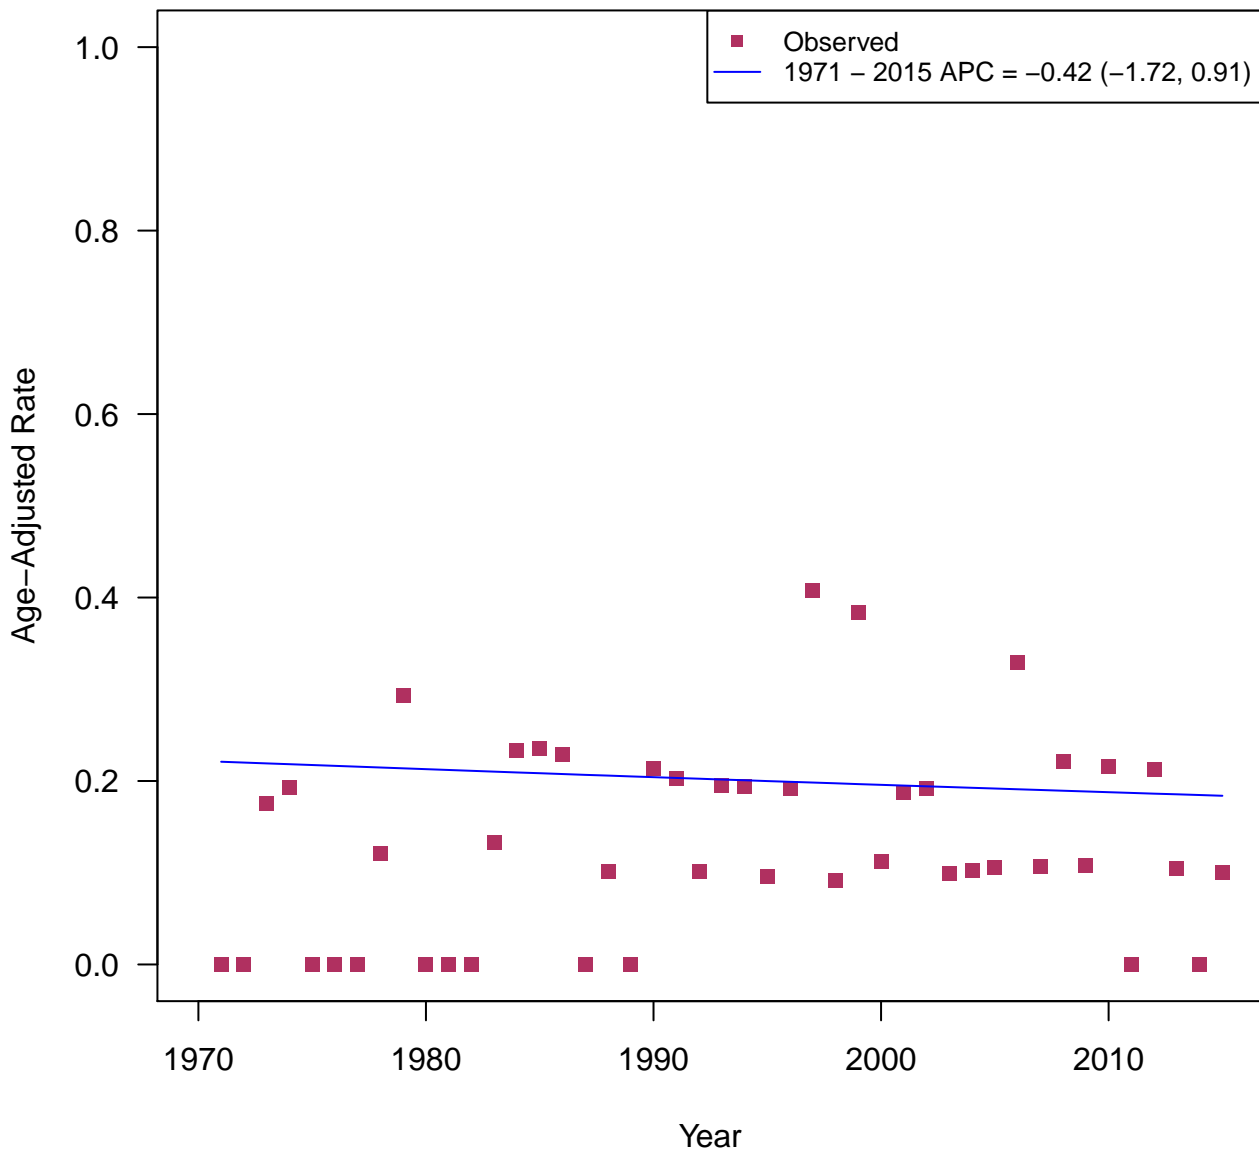

**Figure 43. Age-adjusted incidence rates of anal cancer in females aged 20–49 years in Canada, 1971–2015**

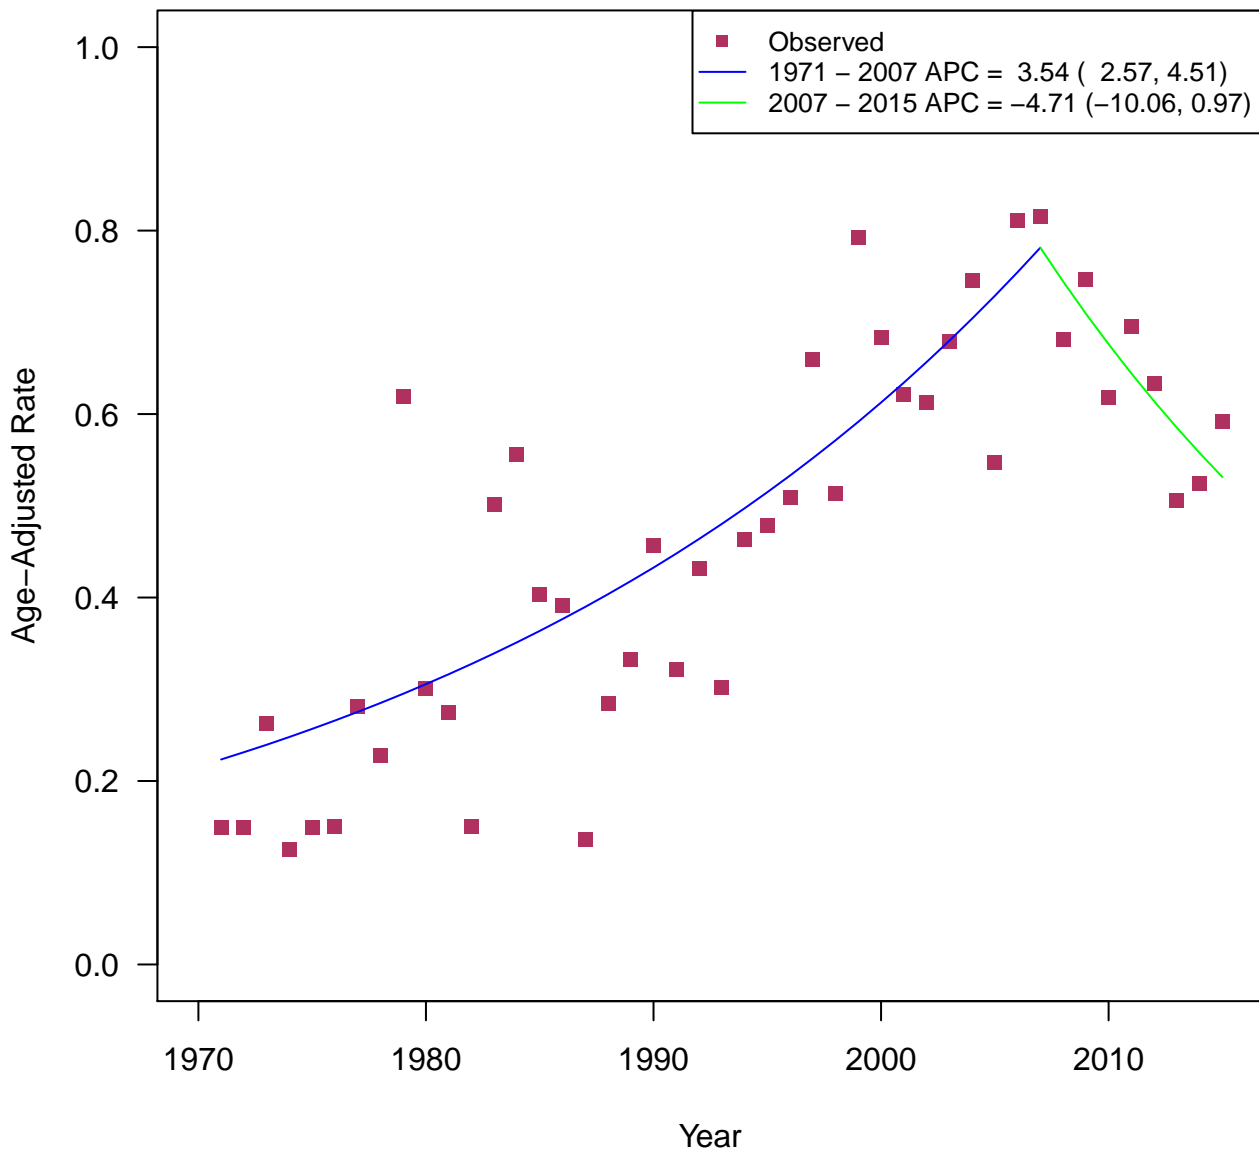



**Figure 44. Age-adjusted incidence rates of anal cancer in females aged 30–39 years in Canada, 1971–2015**

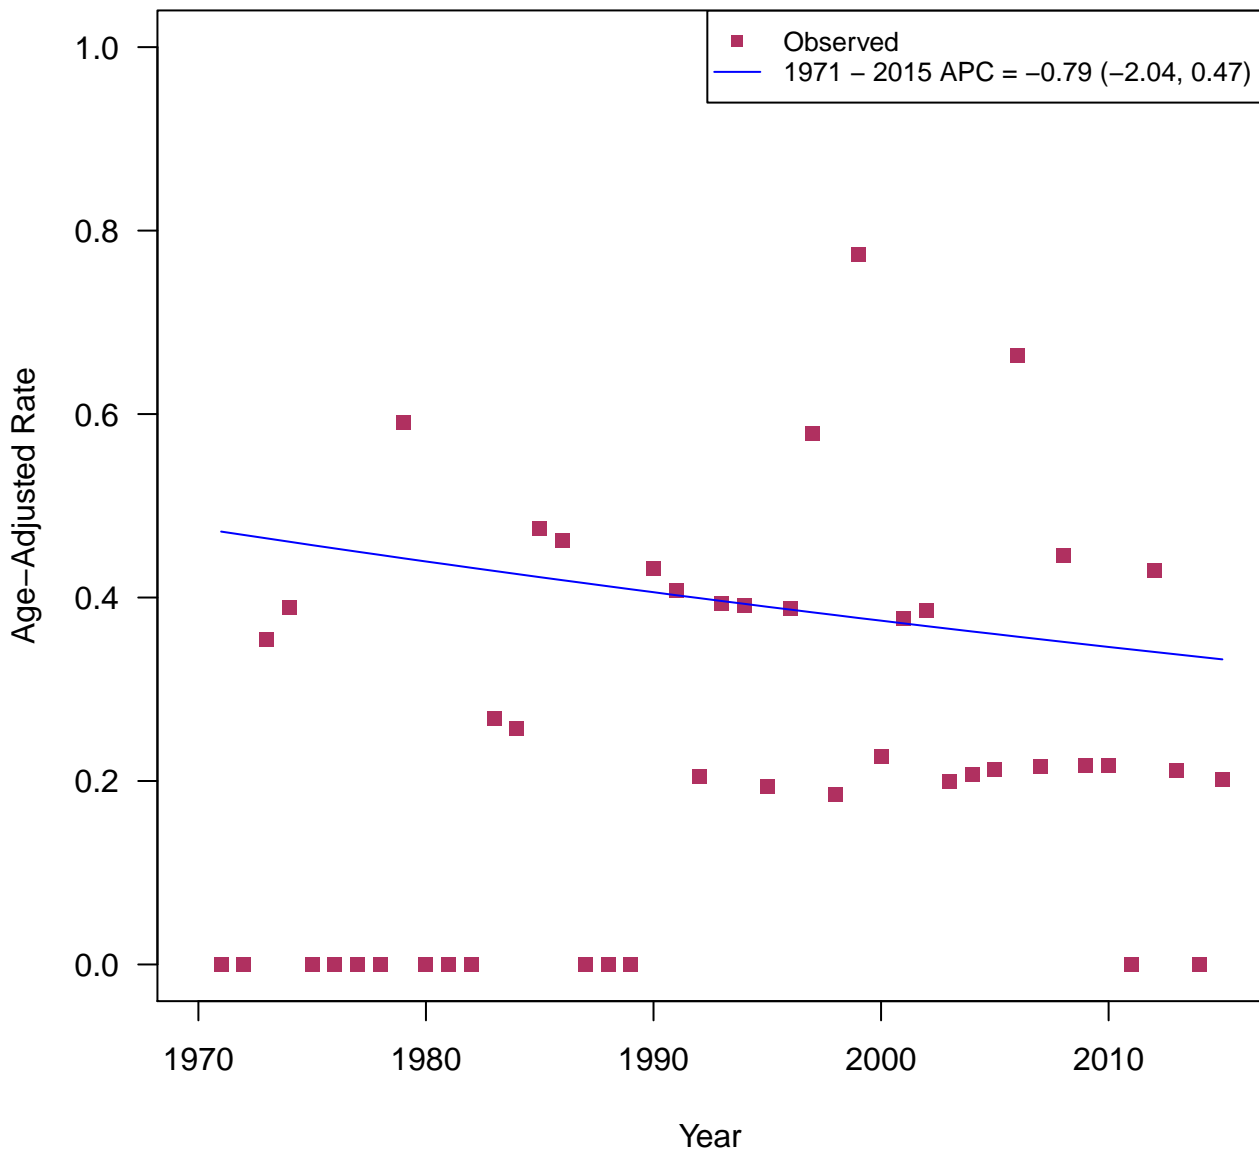

**Figure 45. Age-adjusted incidence rates of anal cancer in females aged 40–49 years in Canada, 1971–2015**

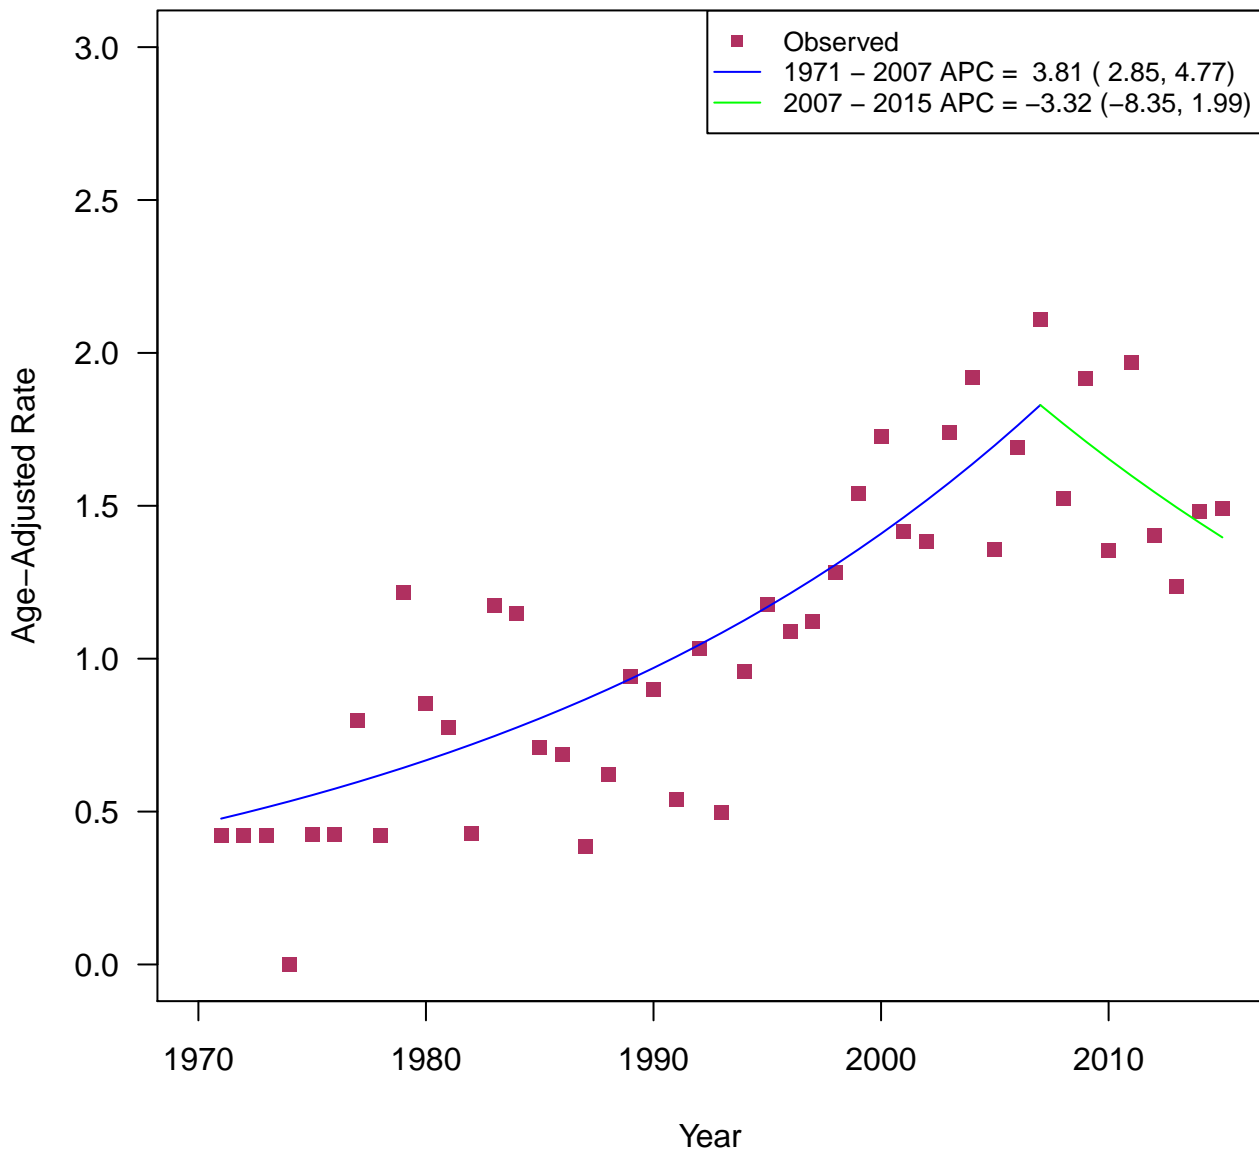

**Figure 46. Age-adjusted incidence rates of anal cancer in females aged 50–59 years in Canada, 1971–2015**

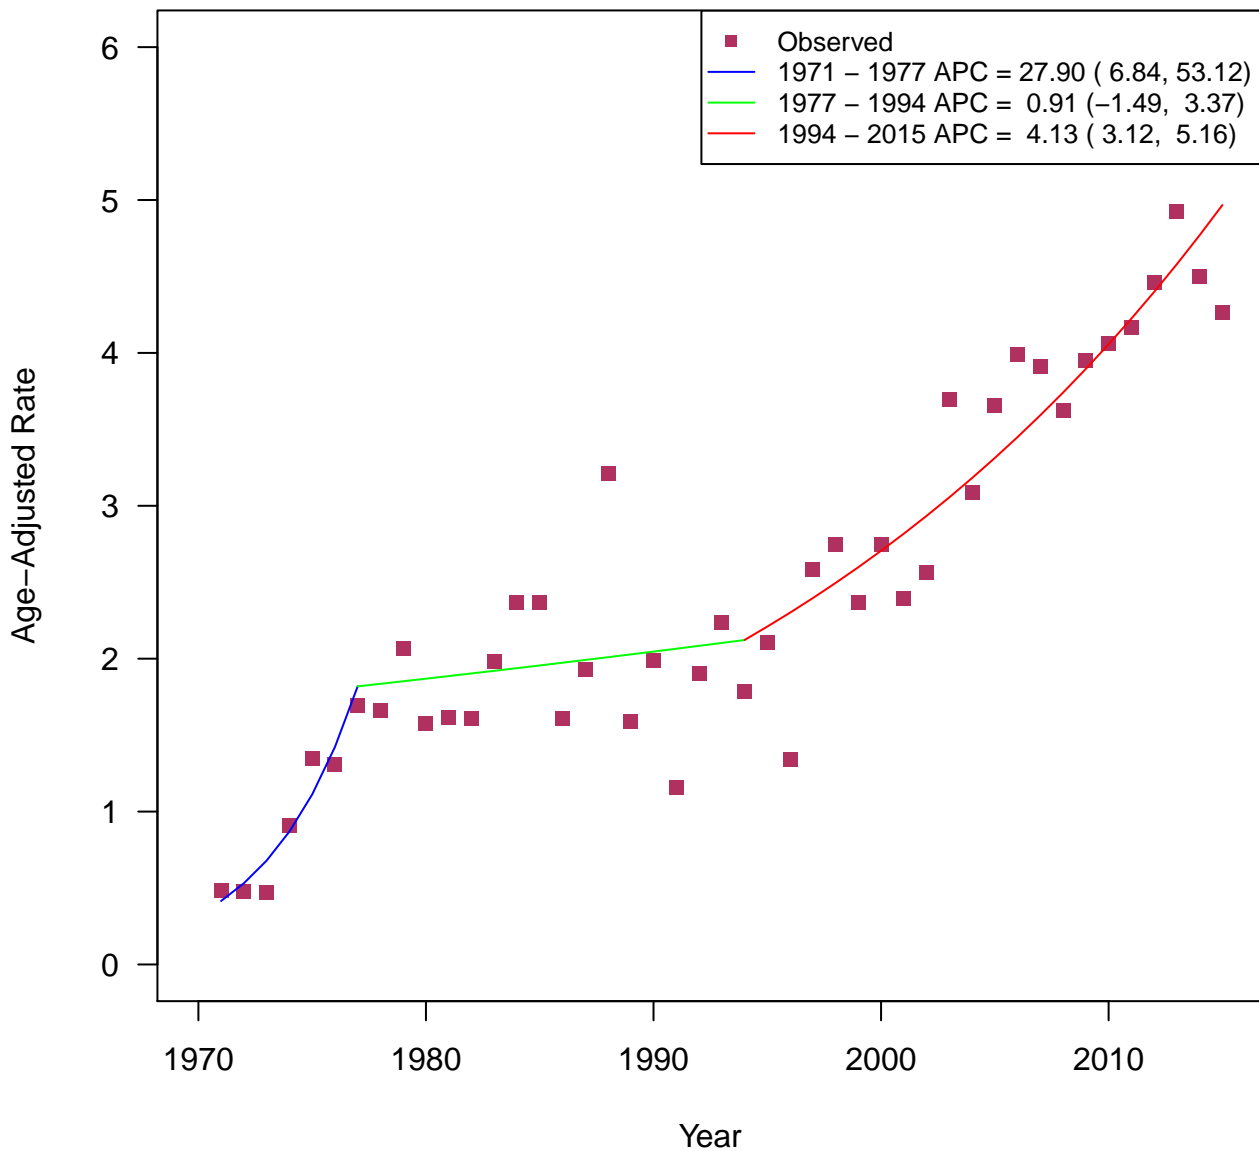

**Figure 47. Age-adjusted incidence rates of anal cancer in females aged 60–69 years in Canada, 1971–2015**

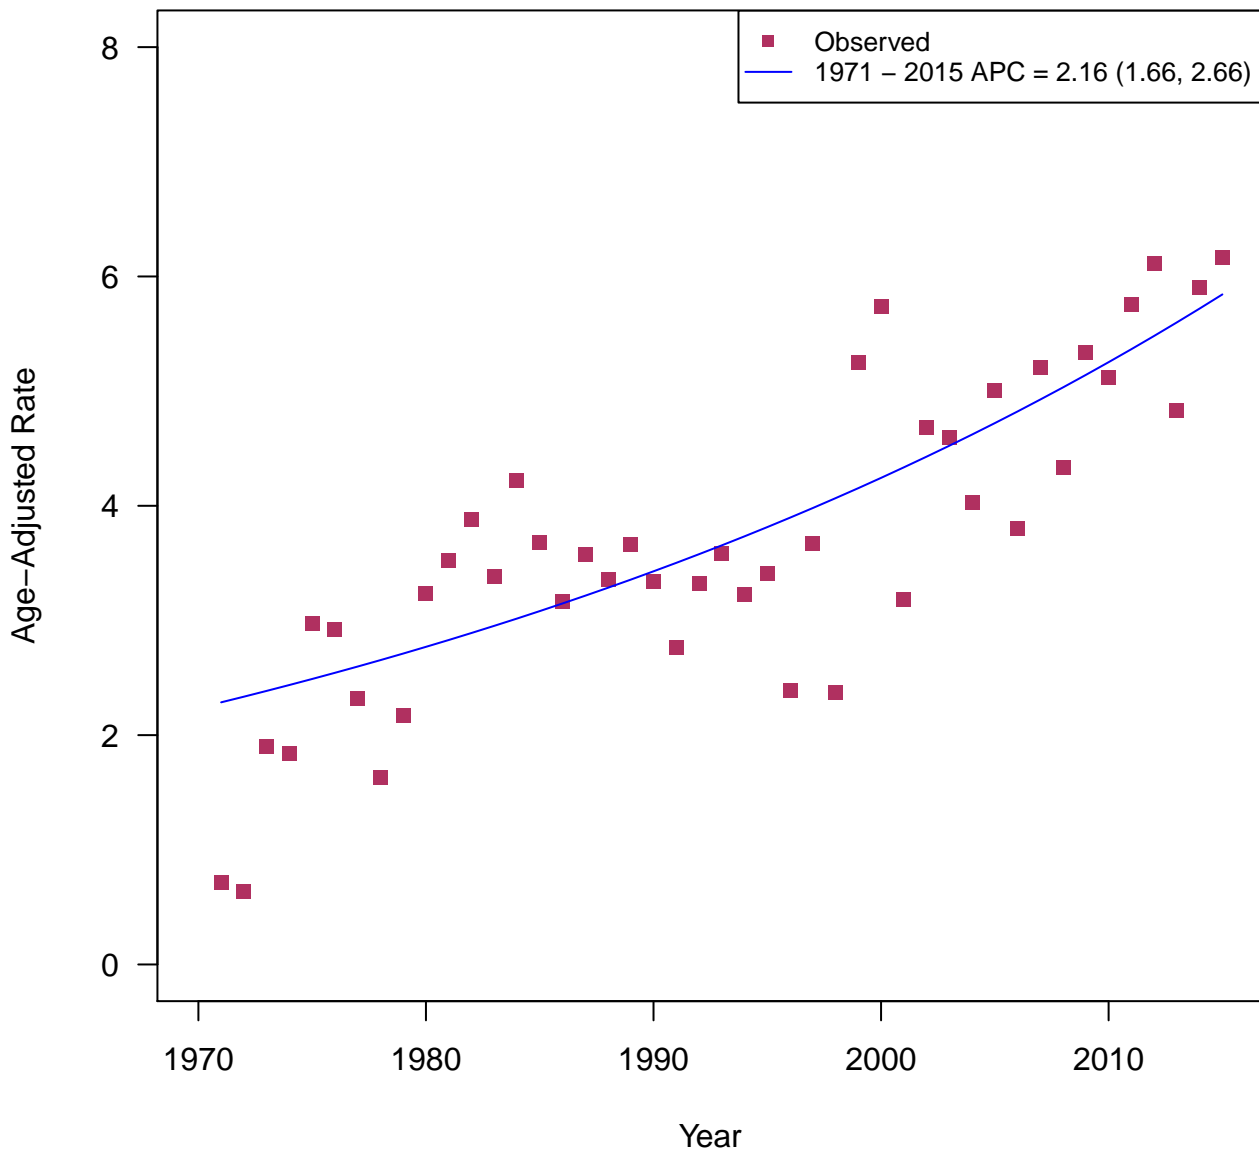

**Figure 48. Age-adjusted incidence rates of anal cancer in females aged 70–79 years in Canada, 1971–2015**

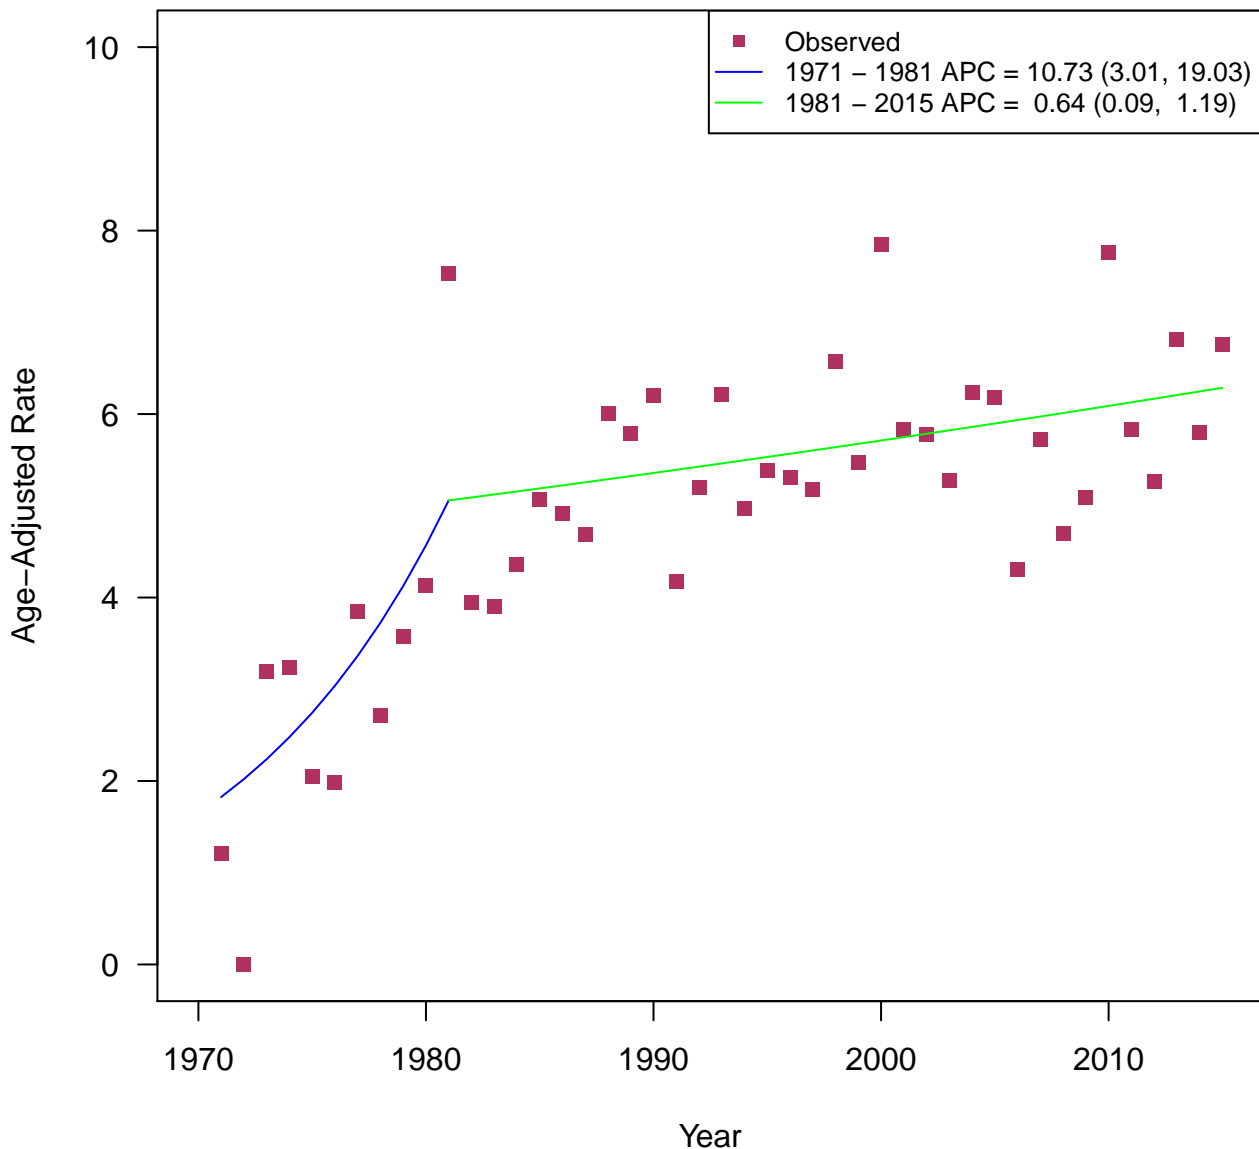

**Figure 49. Age-adjusted incidence rates of anal cancer in females aged 80–89 years in Canada, 1971–2015**

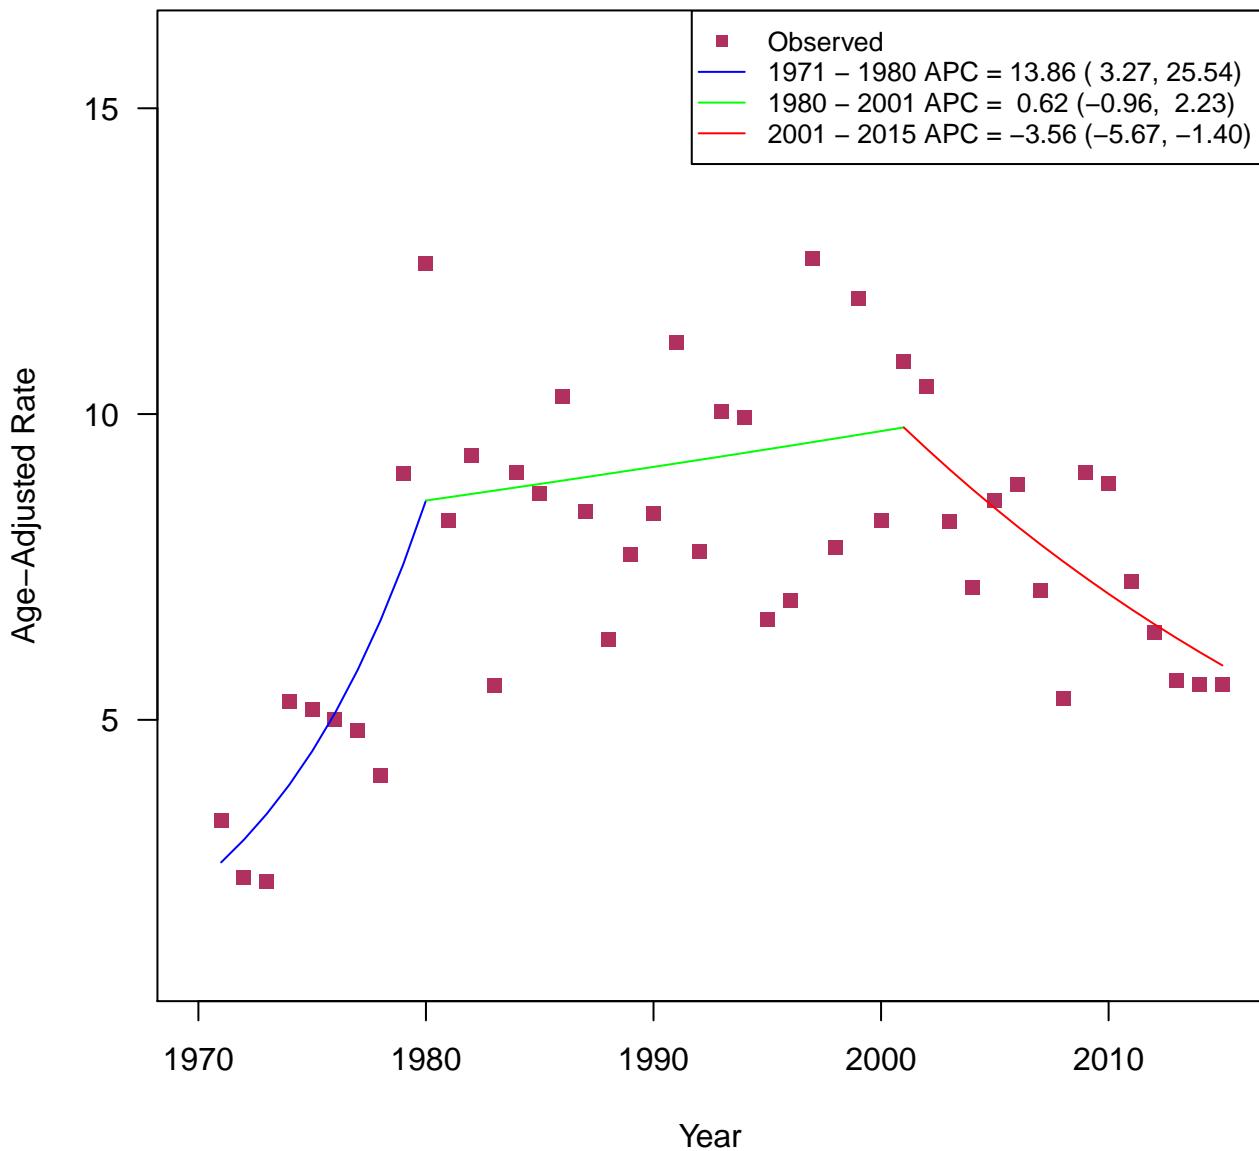

**Figure 50. Age-adjusted incidence rates of bladder cancer in males aged 20–39 years in Canada, 1971–2015**

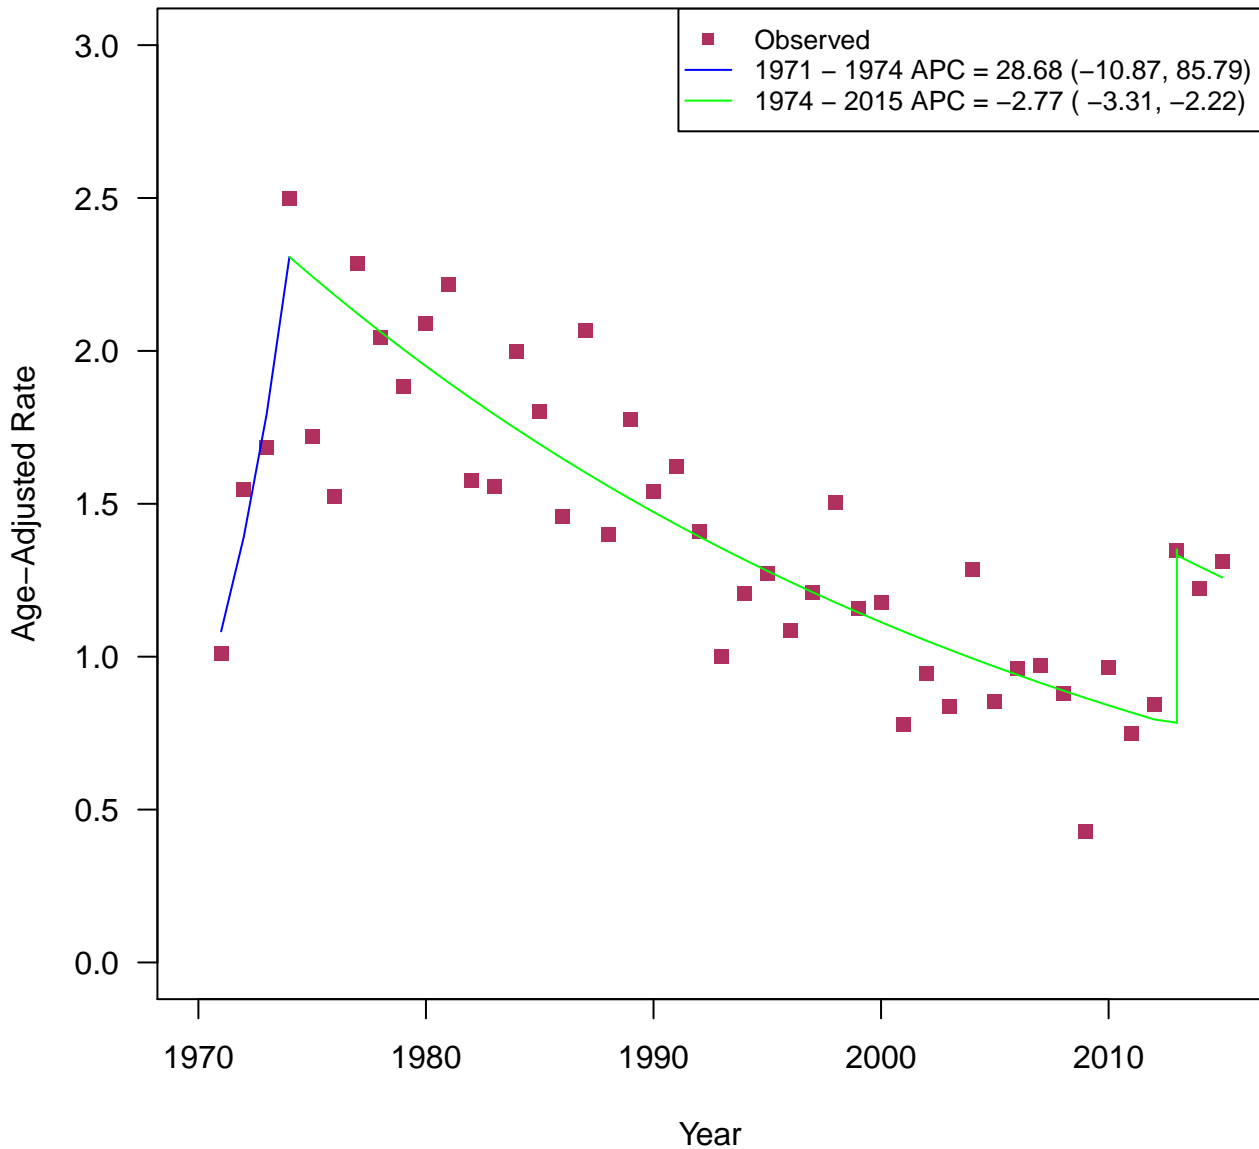

**Figure 51. Age-adjusted incidence rates of bladder cancer in males aged 40–49 years in Canada, 1971–2015**

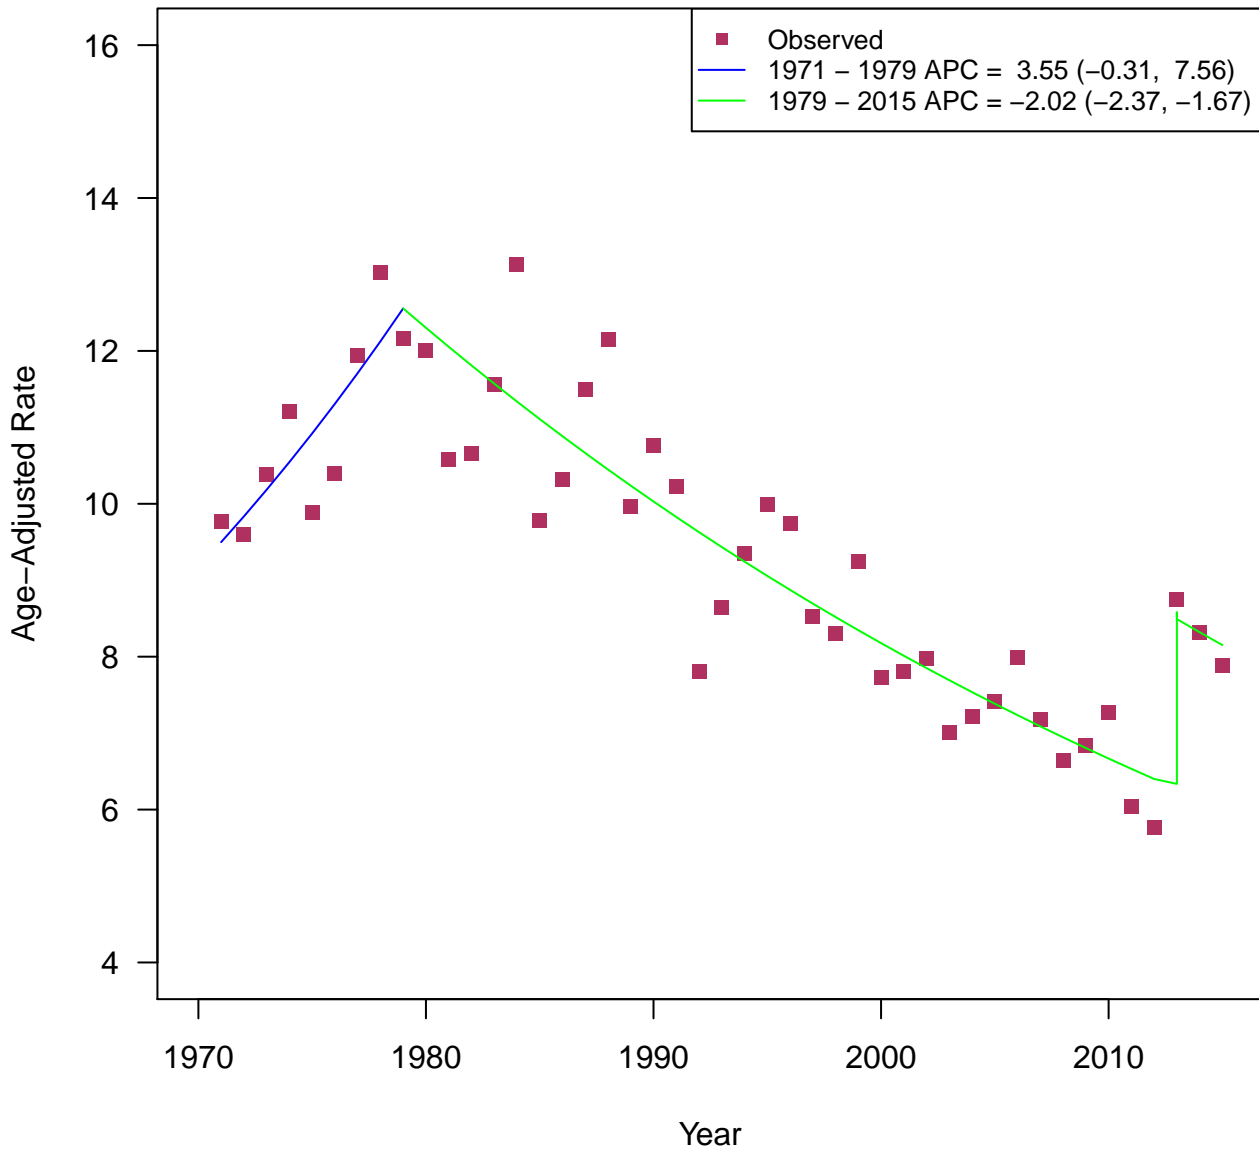



**Figure 52. Age-adjusted incidence rates of bladder cancer in males aged 50–59 years in Canada, 1971–2015**

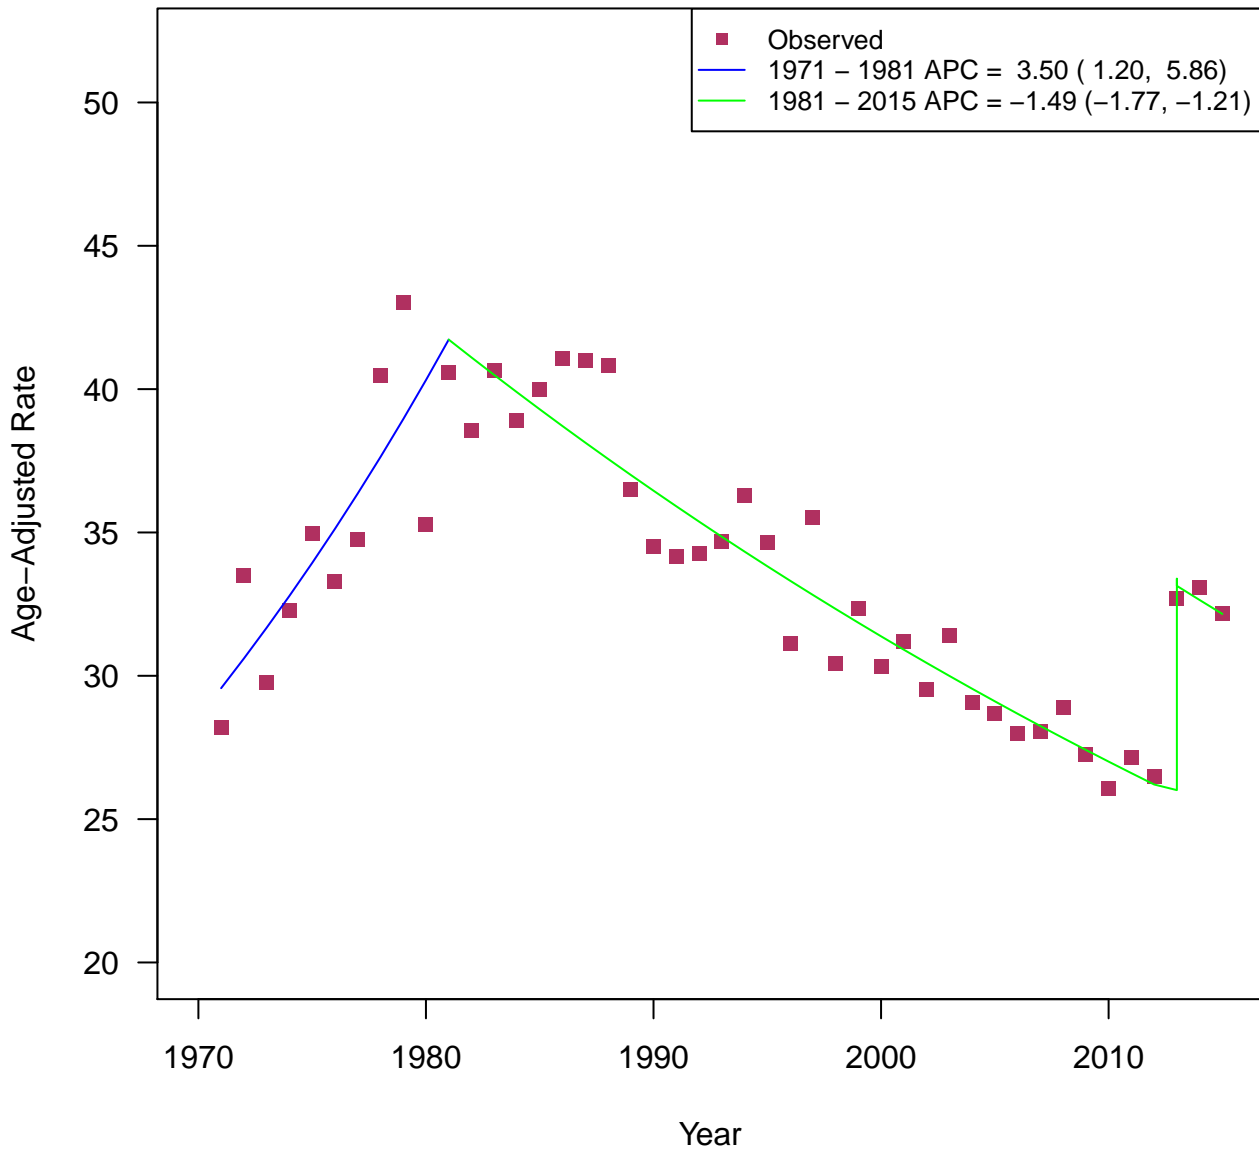

**Figure 53. Age-adjusted incidence rates of bladder cancer in males aged 60–69 years in Canada, 1971–2015**

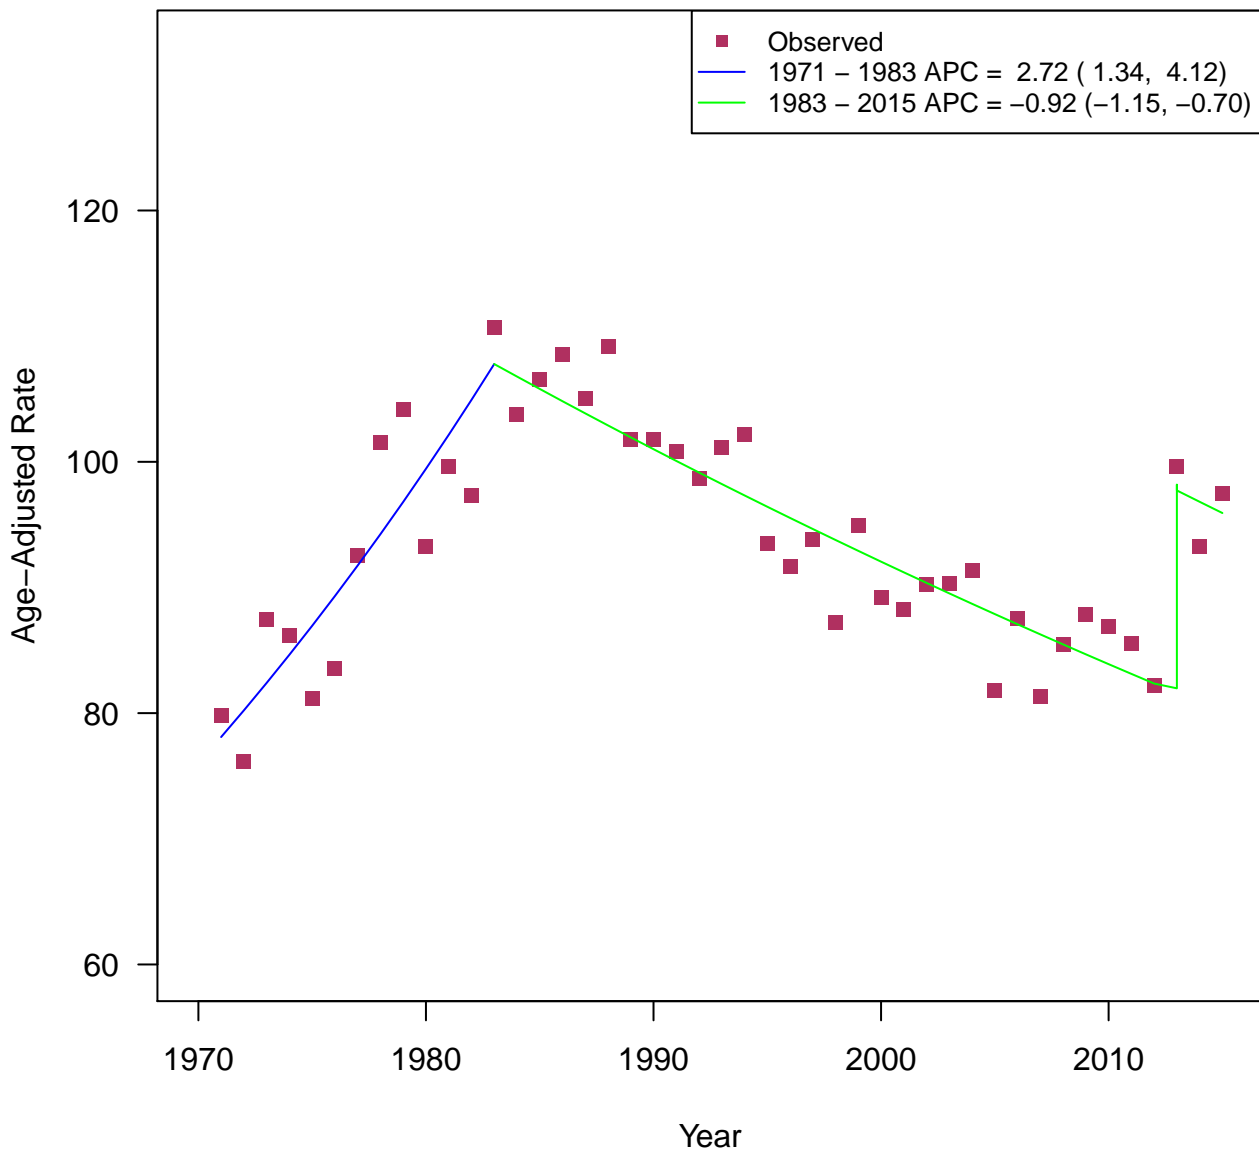

**Figure 54. Age-adjusted incidence rates of bladder cancer in males aged 70–79 years in Canada, 1971–2015**

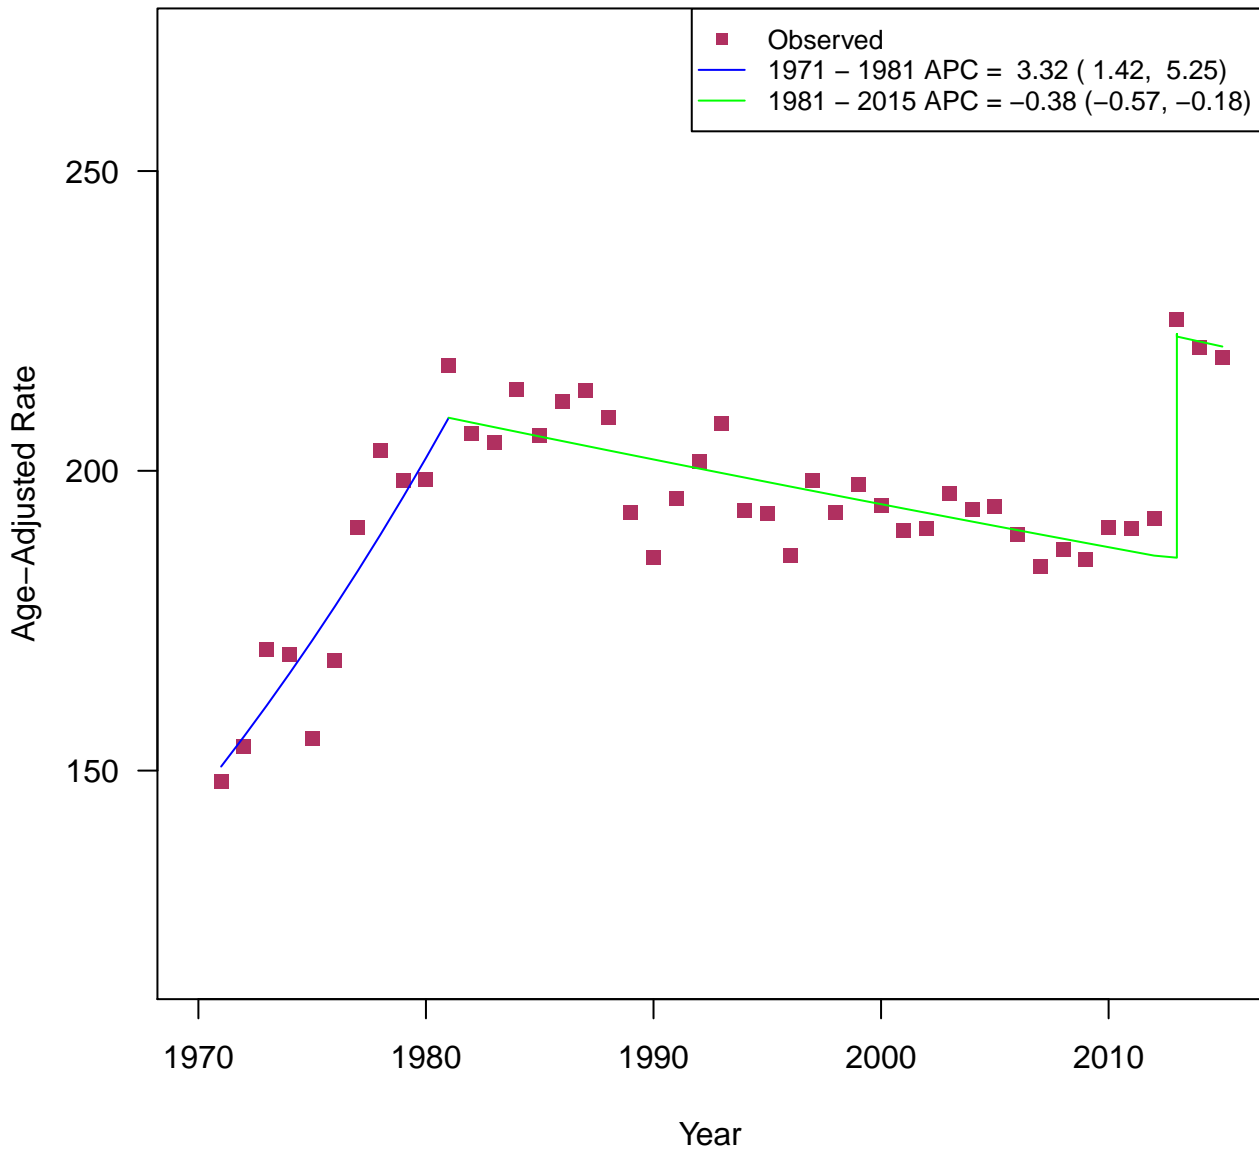

**Figure 55. Age-adjusted incidence rates of bladder cancer in males aged 80–89 years in Canada, 1971–2015**

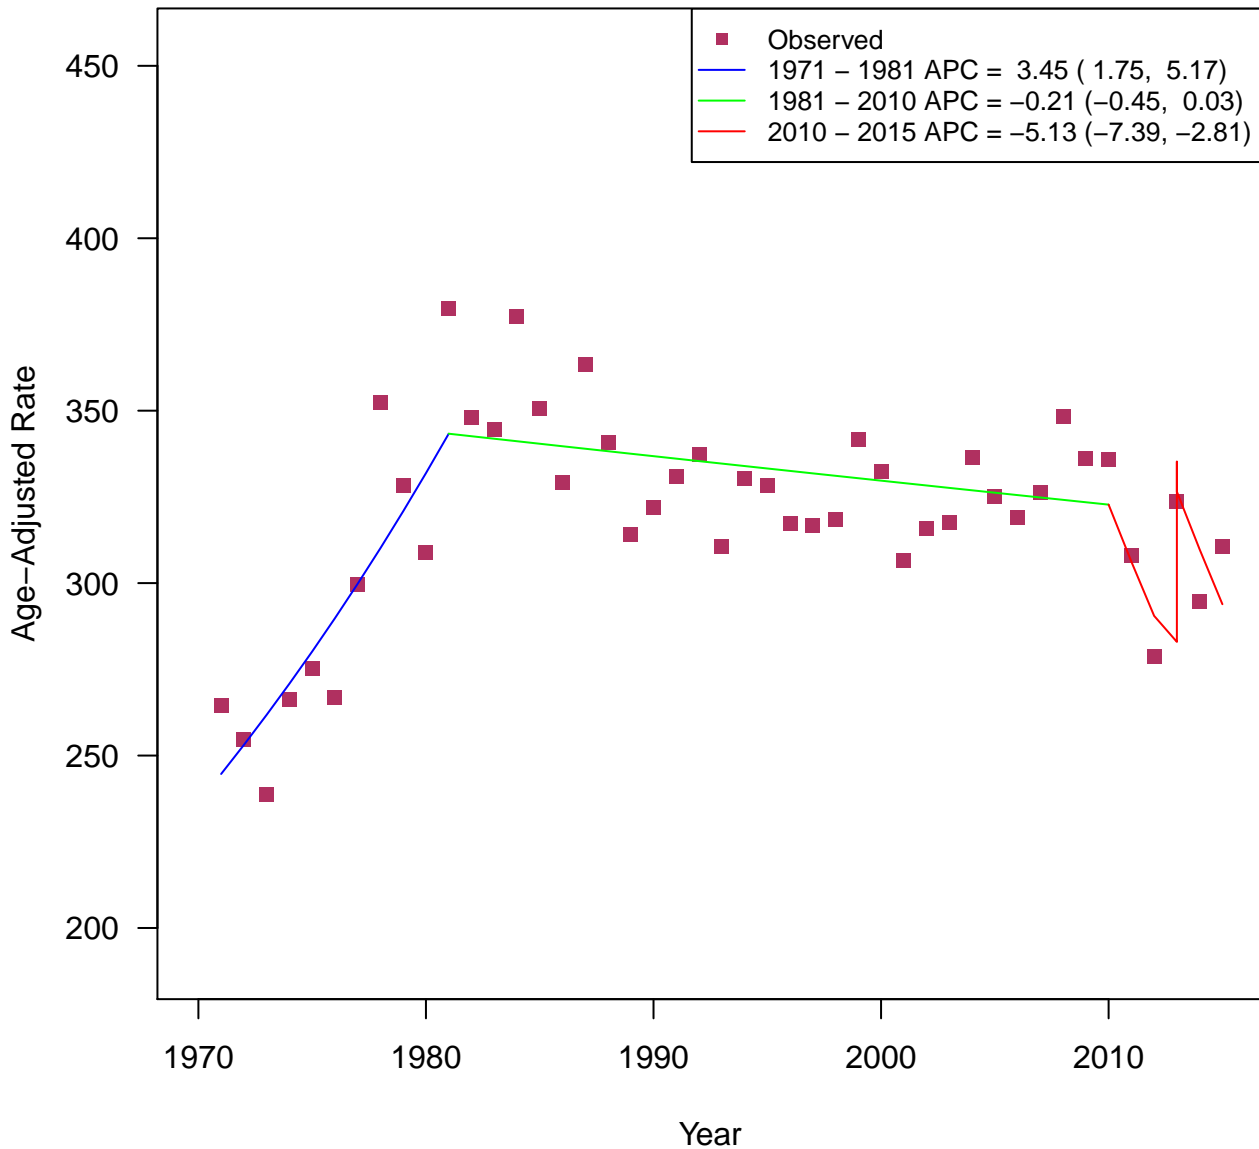

**Figure 56. Age-adjusted incidence rates of bladder cancer in females aged 20–29 years in Canada, 1971–2015**

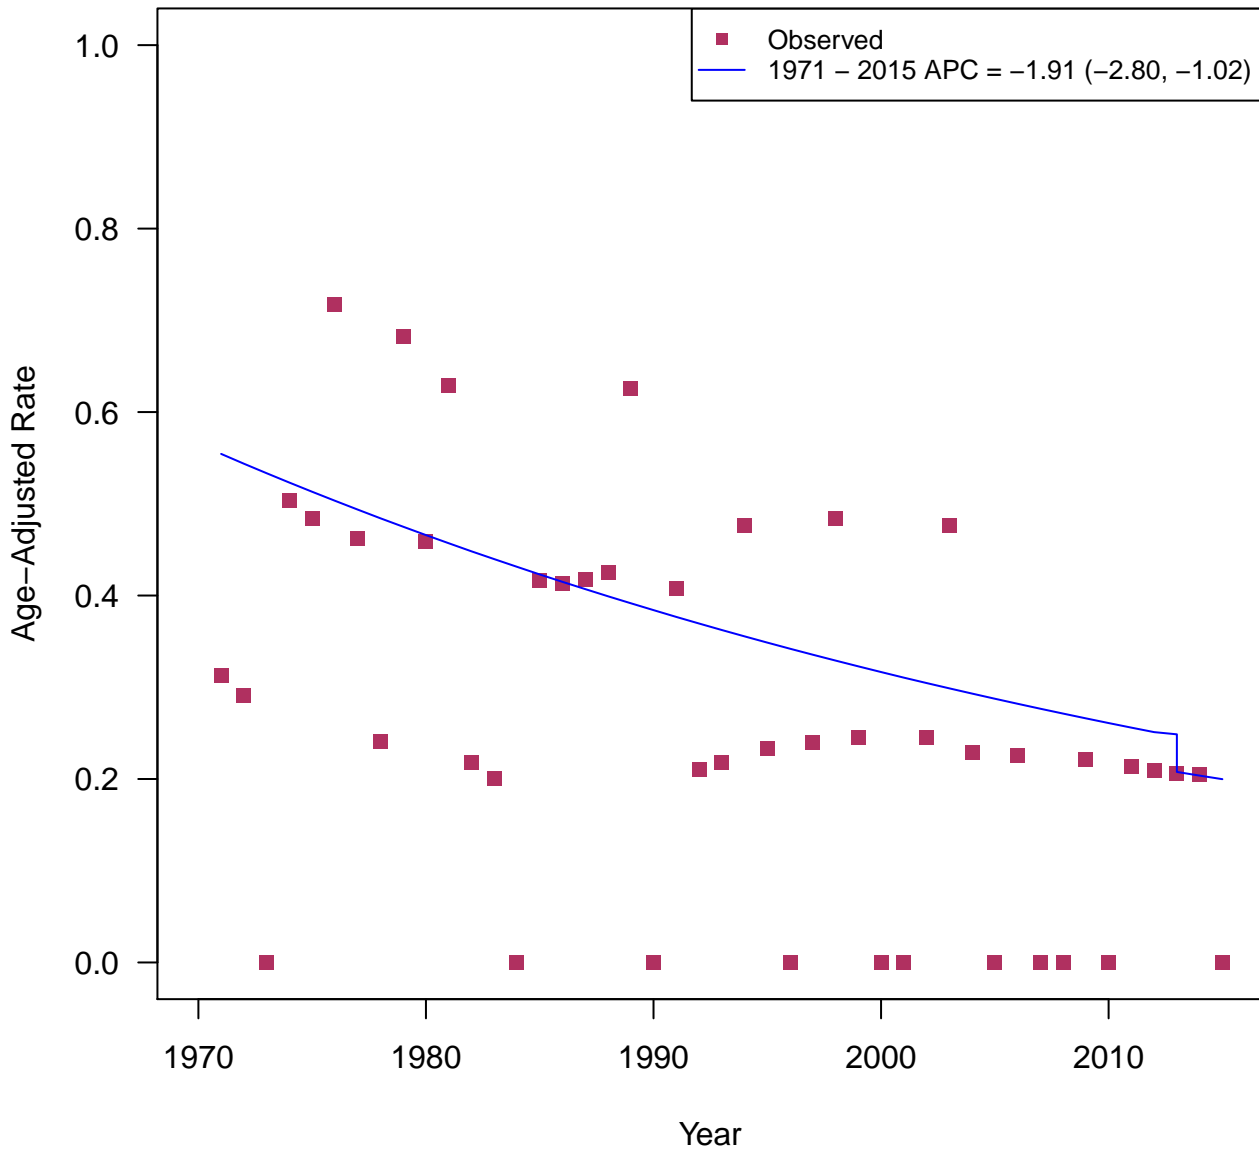

**Figure 57. Age-adjusted incidence rates of bladder cancer in females aged 20–39 years in Canada, 1971–2015**

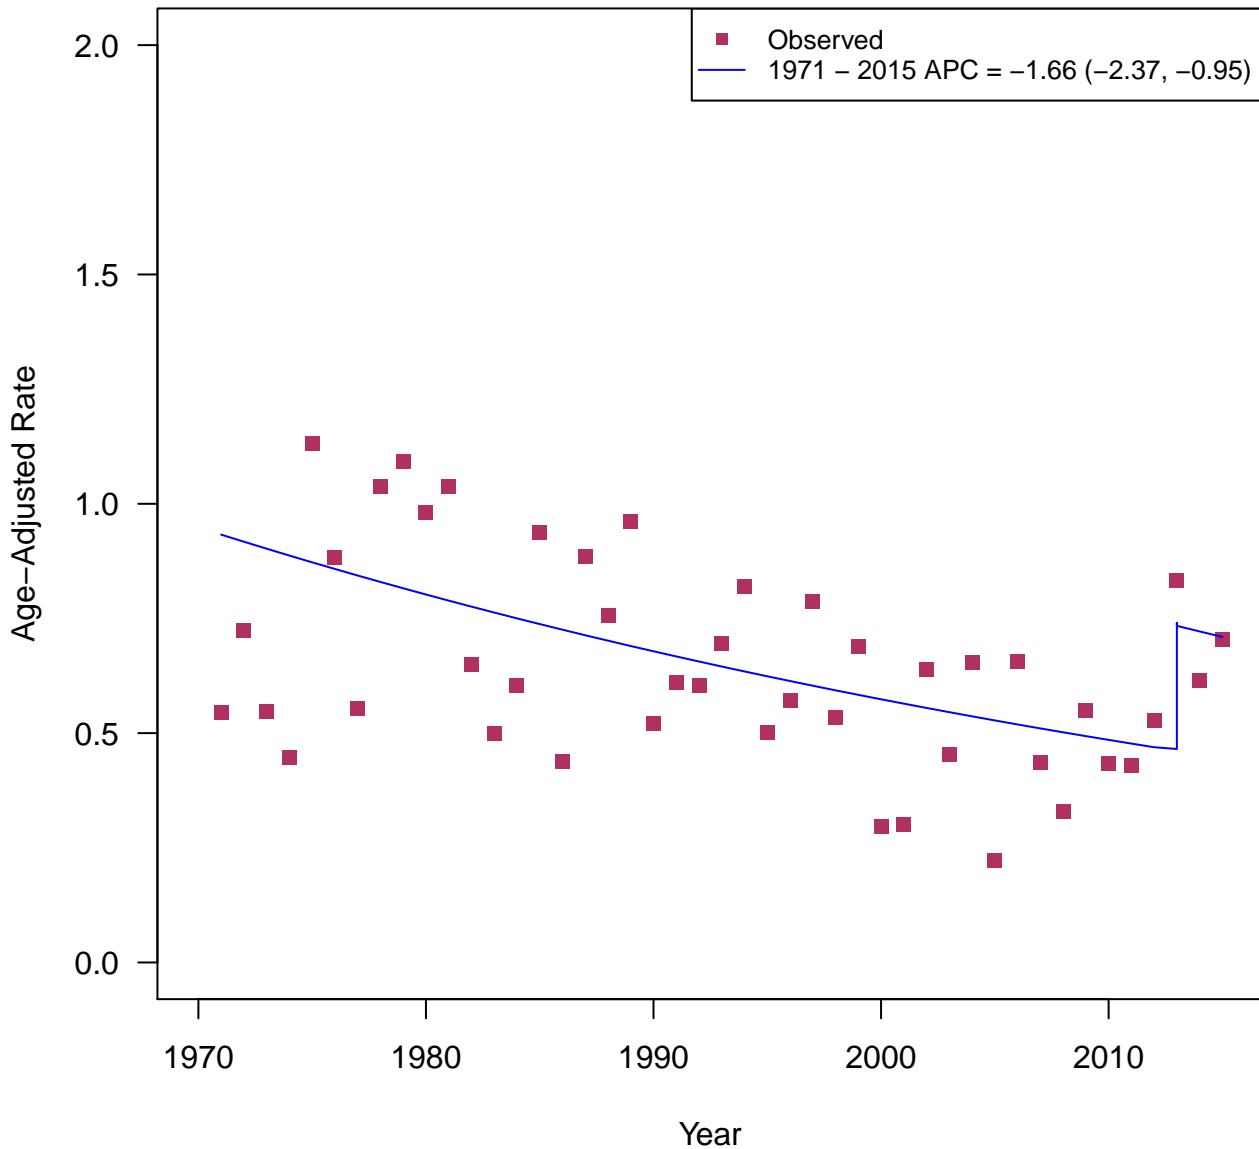

**Figure 58. Age-adjusted incidence rates of bladder cancer in females aged 40–49 years in Canada, 1971–2015**

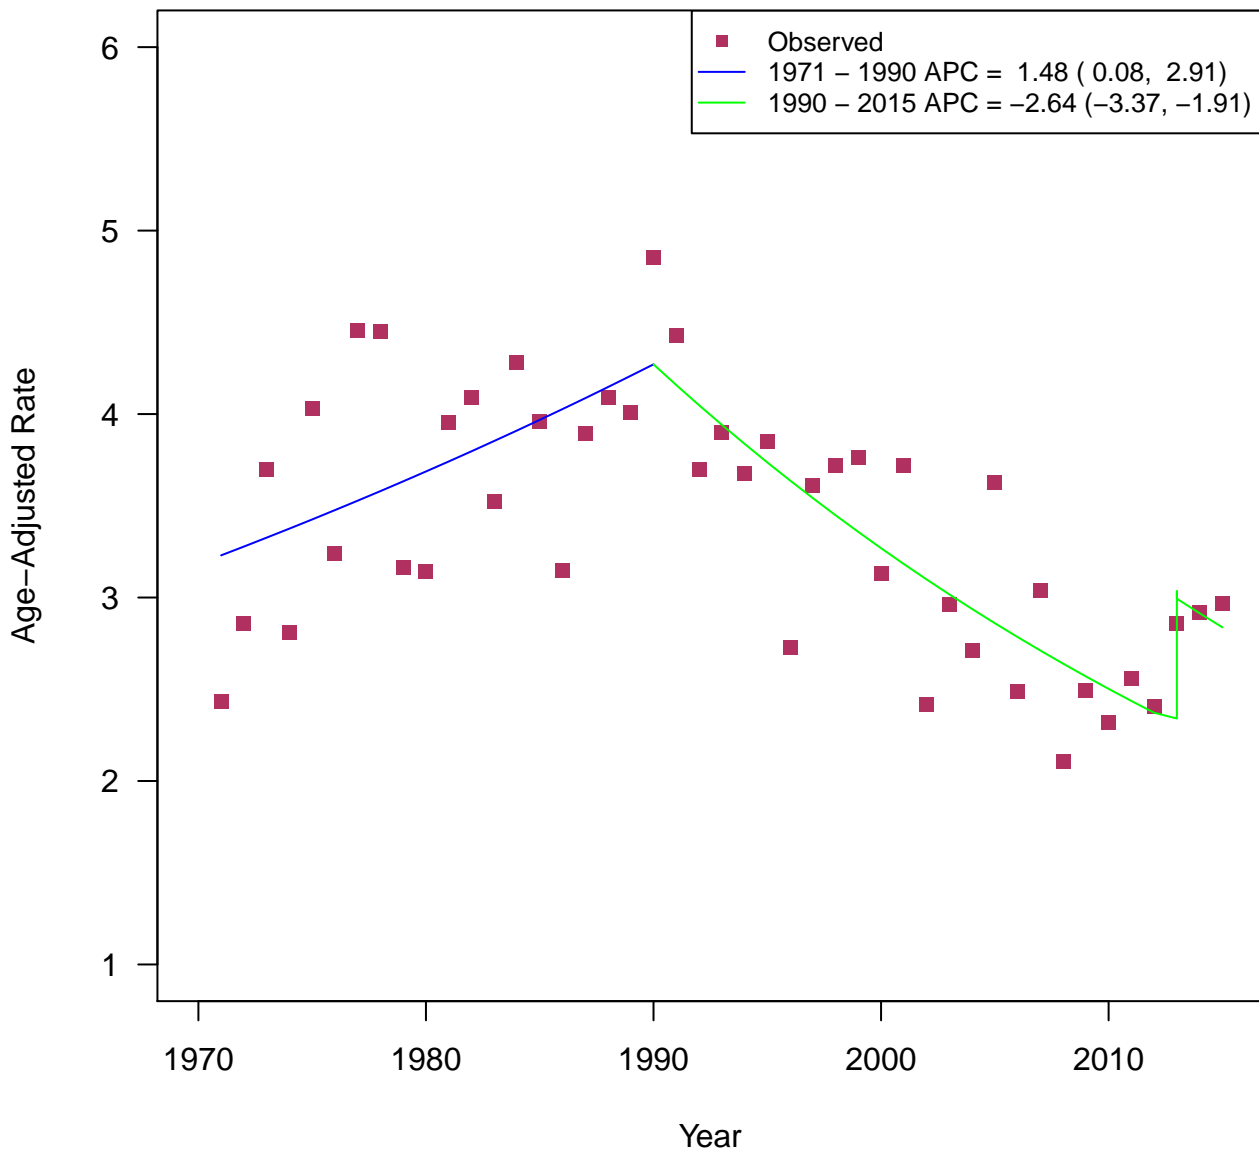

**Figure 59. Age-adjusted incidence rates of bladder cancer in females aged 50–59 years in Canada, 1971–2015**

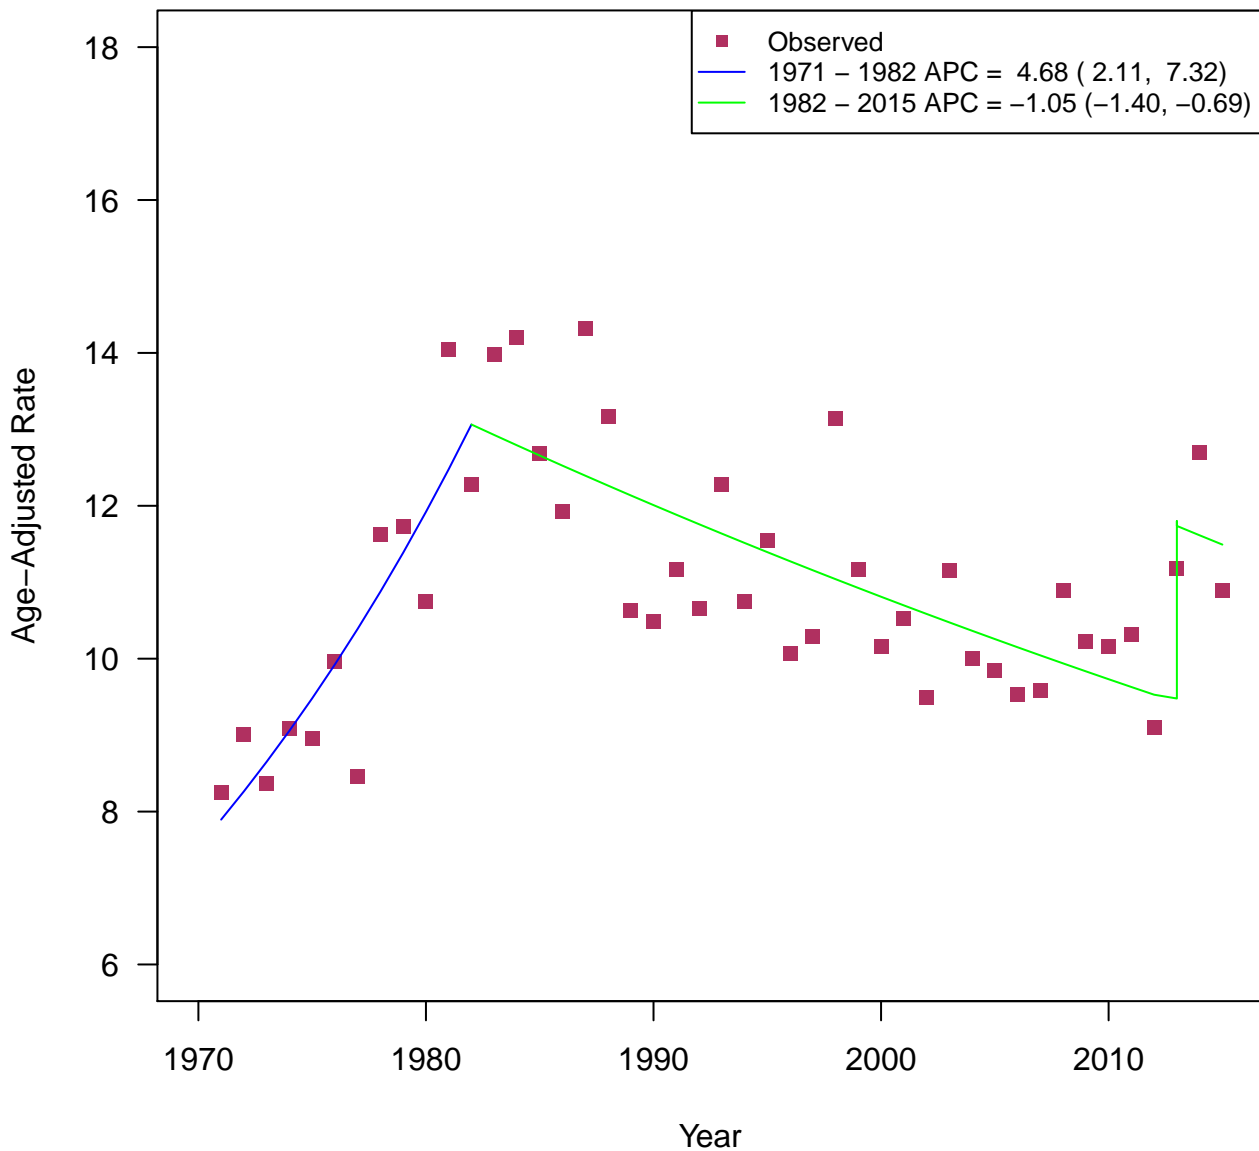



**Figure 60. Age-adjusted incidence rates of bladder cancer in females aged 60–69 years in Canada, 1971–2015**

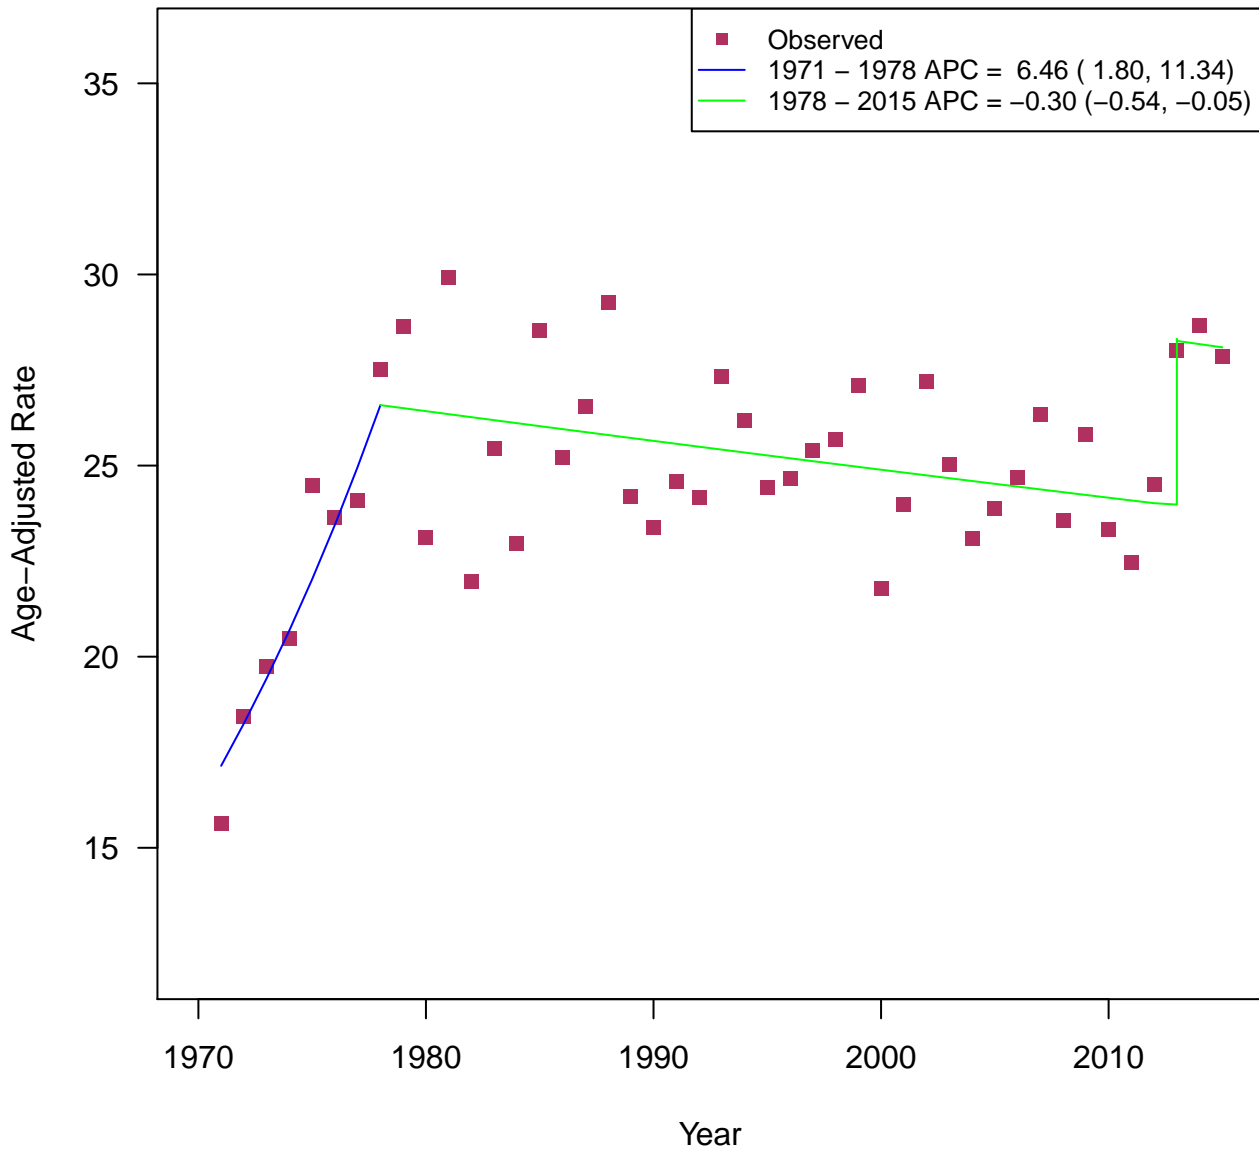

**Figure 61. Age-adjusted incidence rates of bladder cancer in females aged 70–79 years in Canada, 1971–2015**

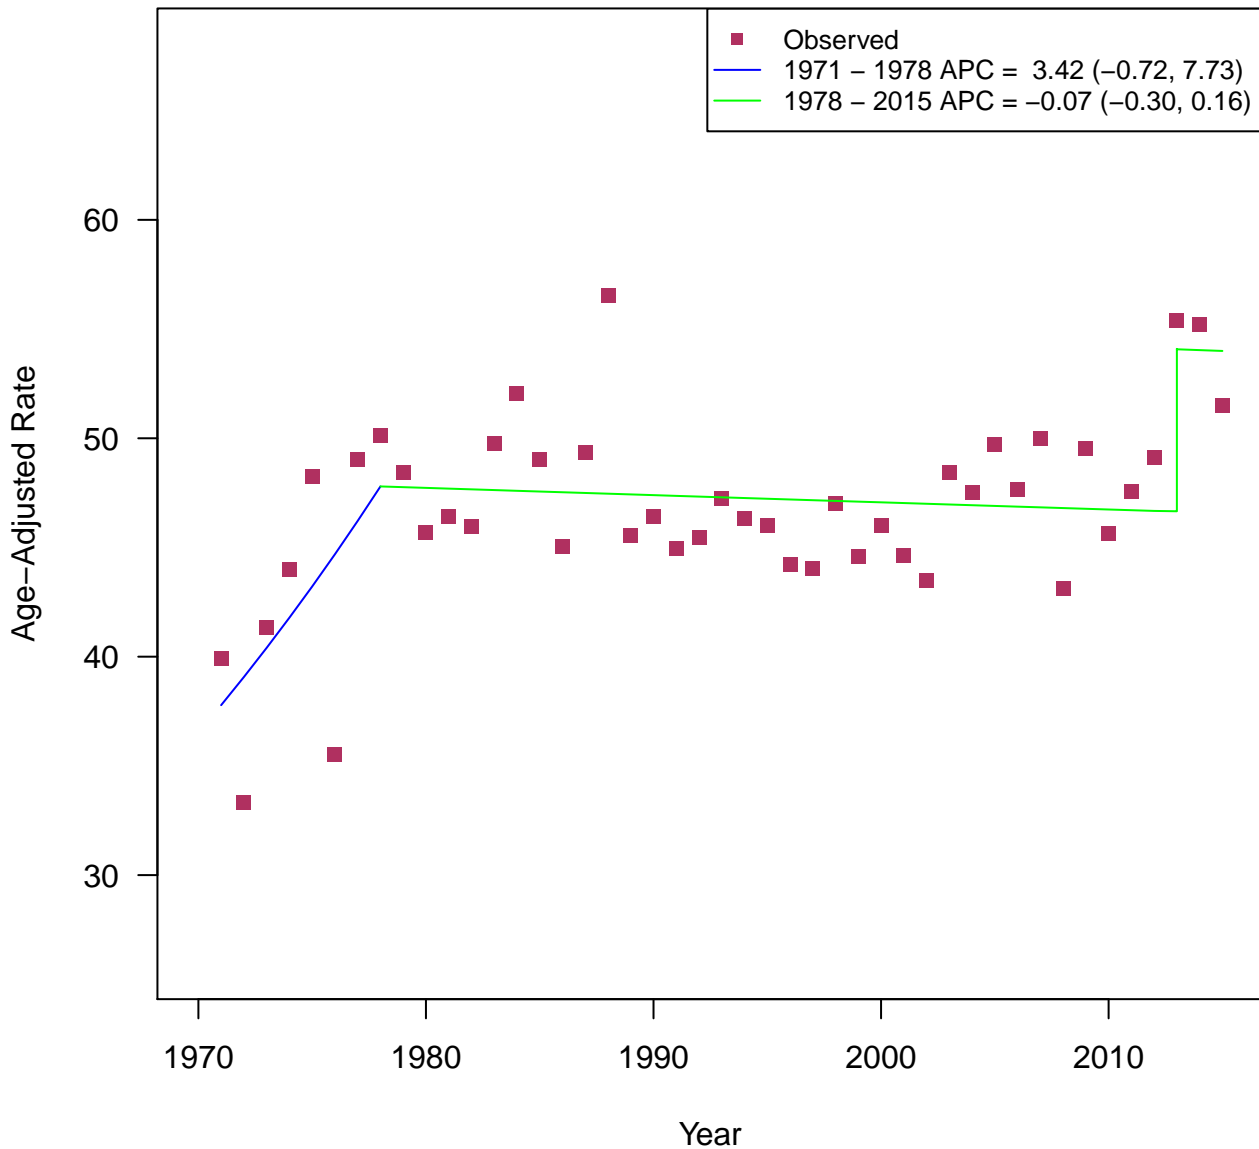

**Figure 62. Age-adjusted incidence rates of bladder cancer in females aged 80–89 years in Canada, 1971–2015**

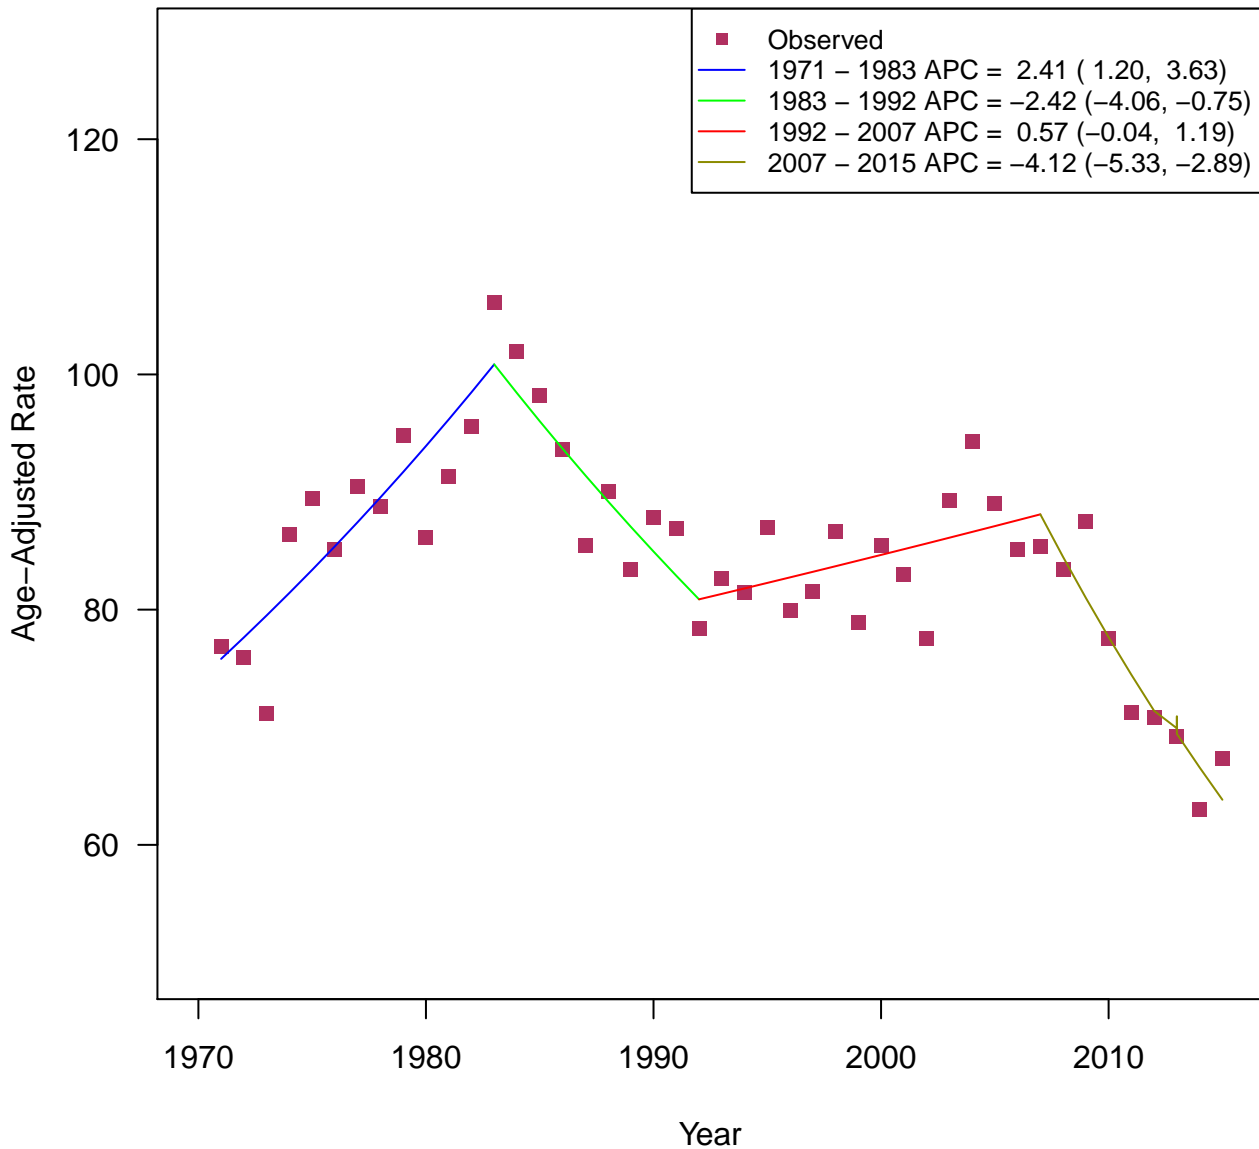

**Figure 63. Age-adjusted incidence rates of breast cancer in females aged 20–29 years in Canada, 1971–2015**

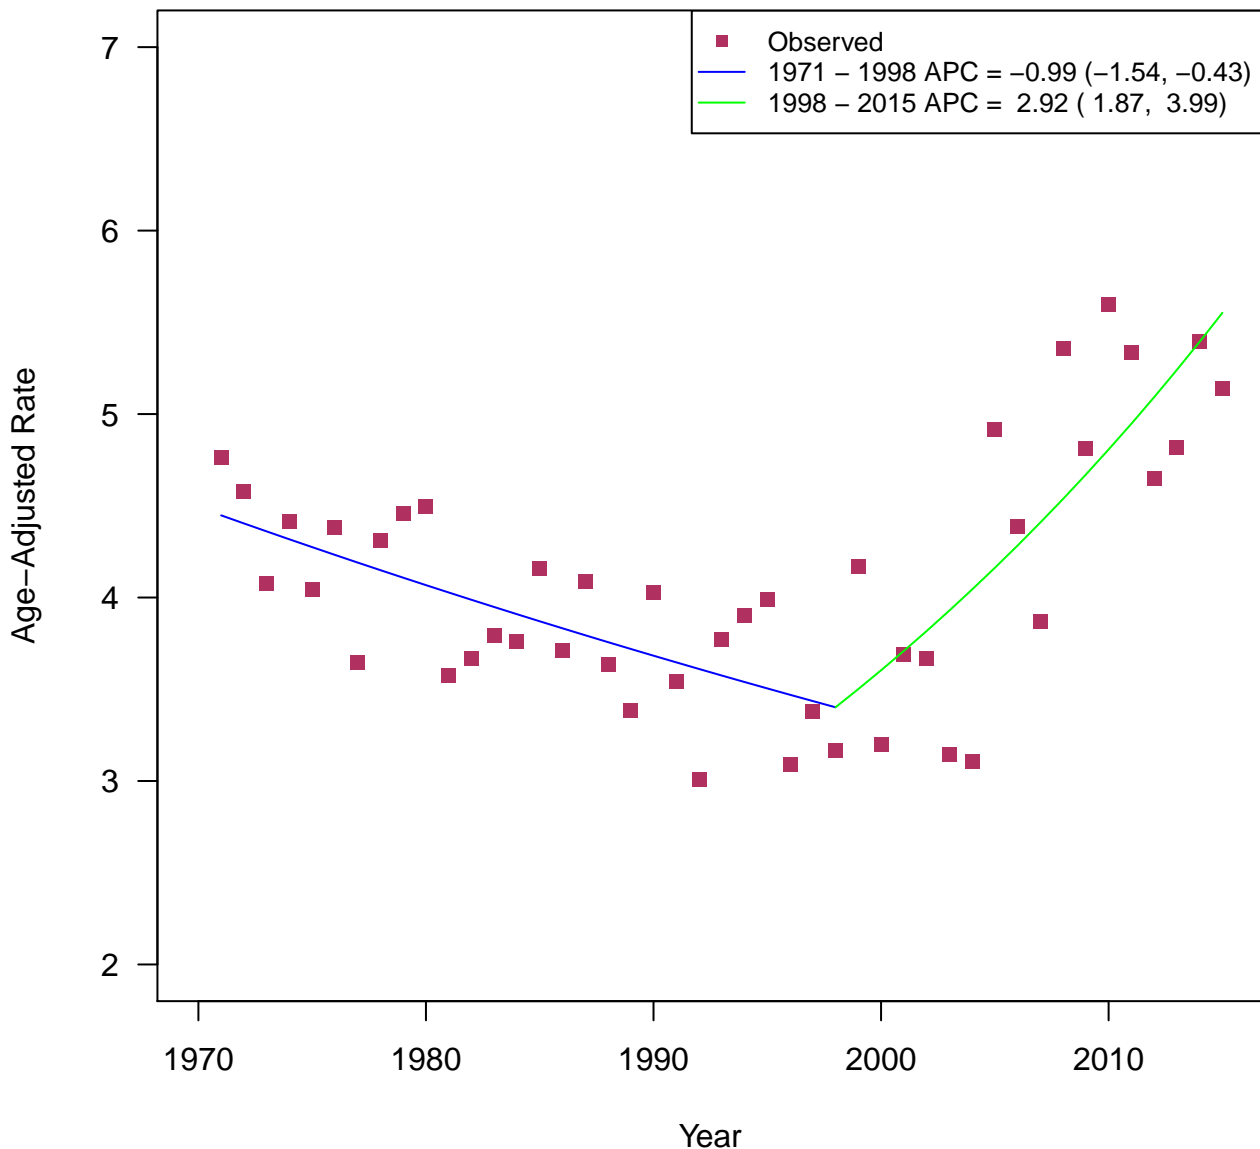

**Figure 64. Age-adjusted incidence rates of breast cancer in females aged 20–39 years in Canada, 1971–2015**

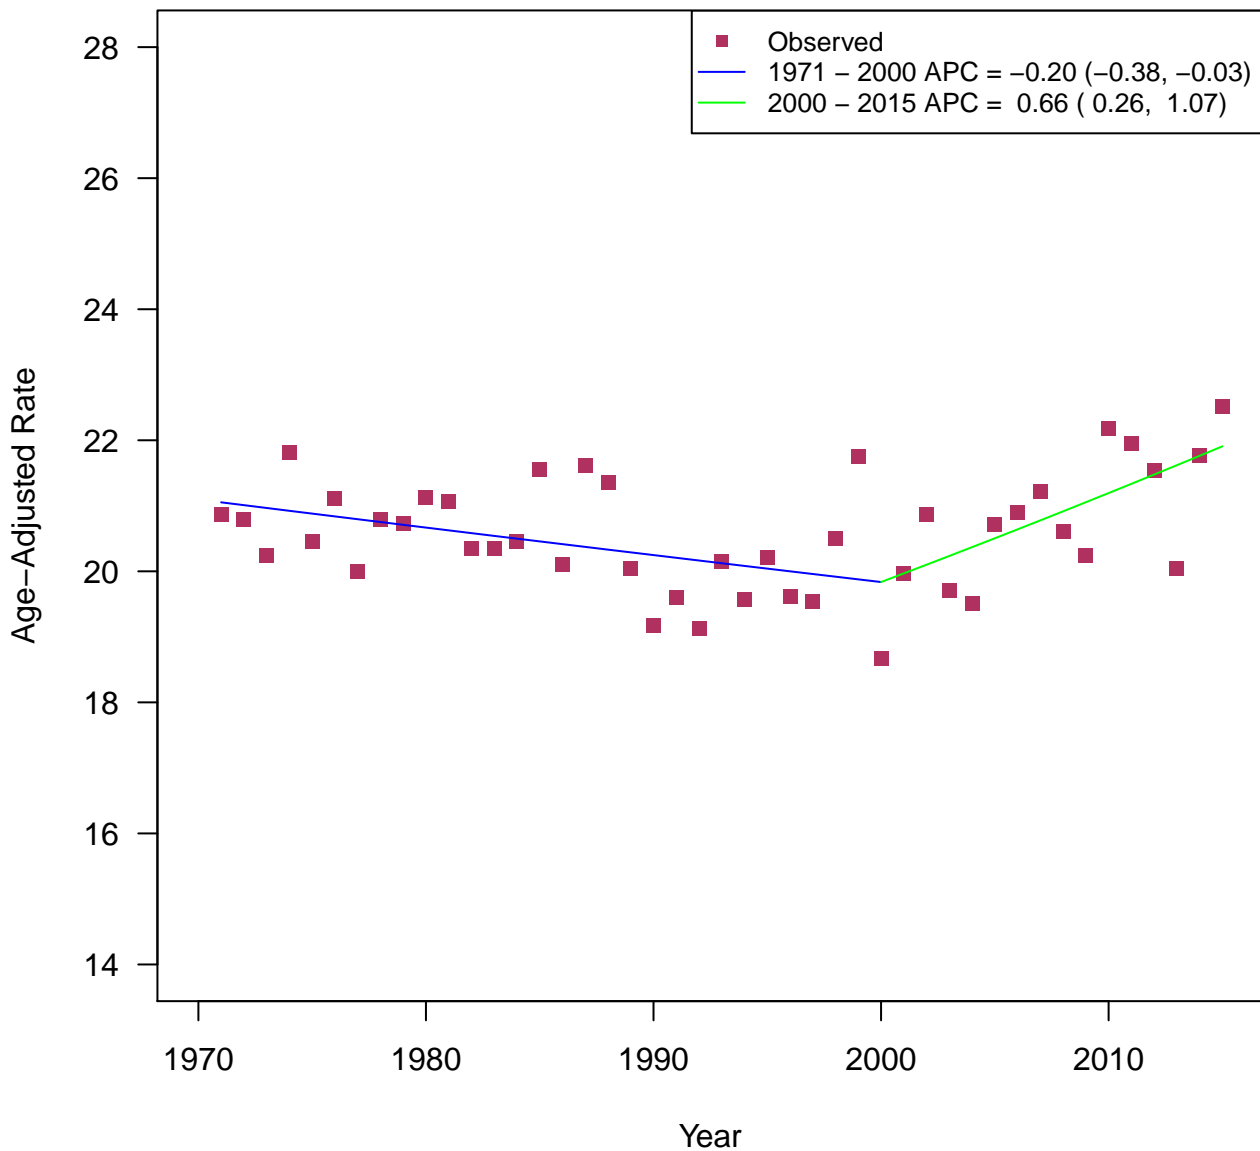

**Figure 65. Age-adjusted incidence rates of breast cancer in females aged 30–39 years in Canada, 1971–2015**

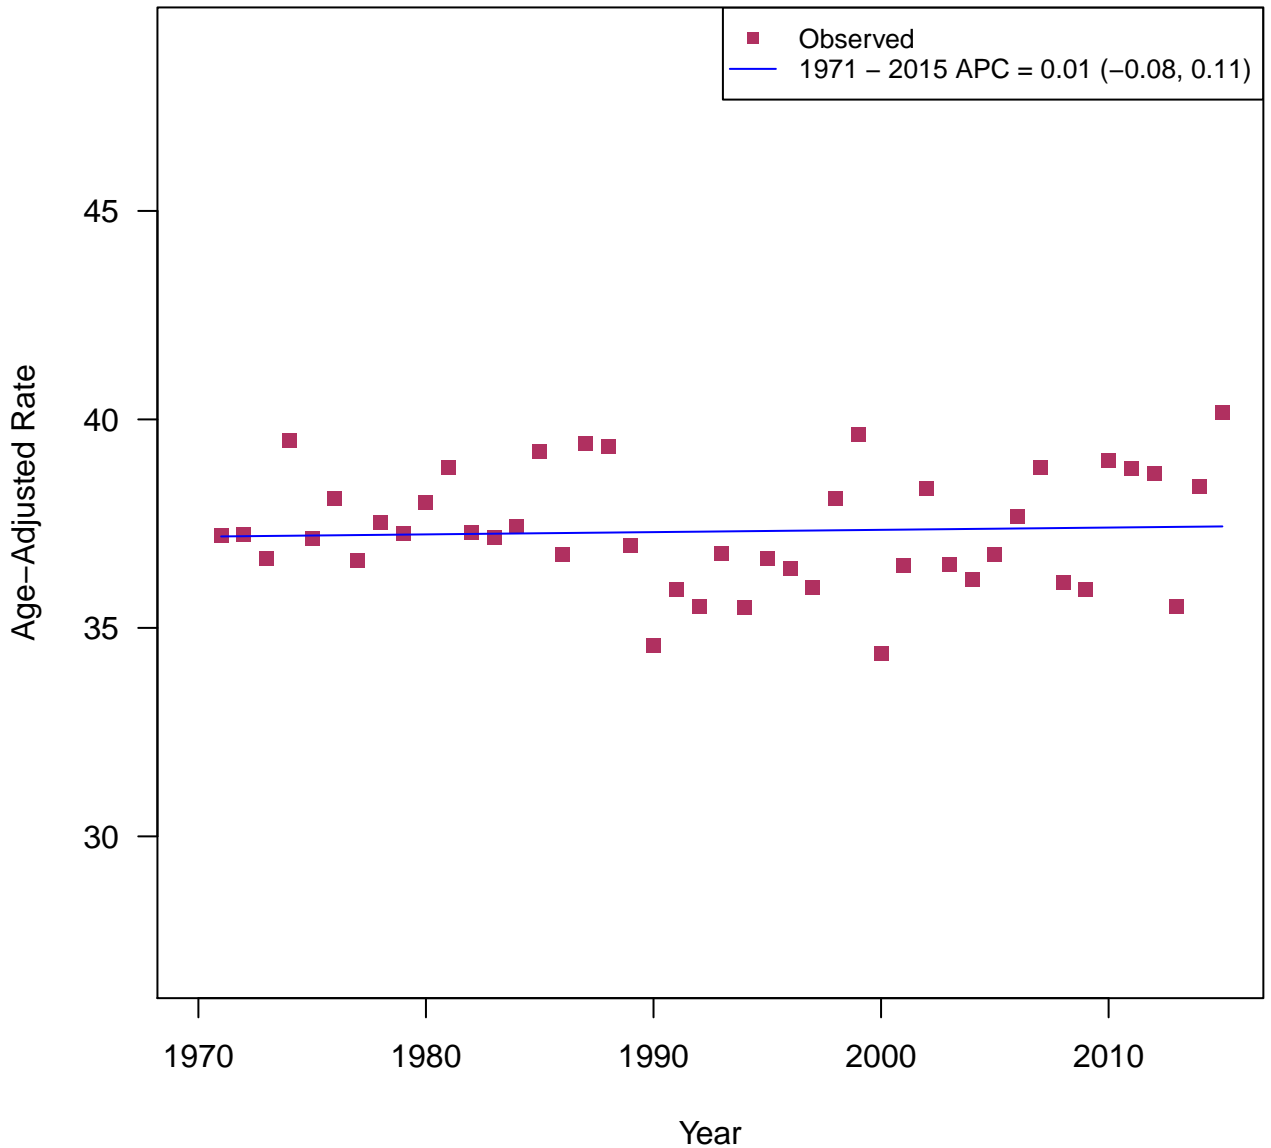

**Figure 66. Age-adjusted incidence rates of breast cancer in females aged 40–49 years in Canada, 1971–2015**

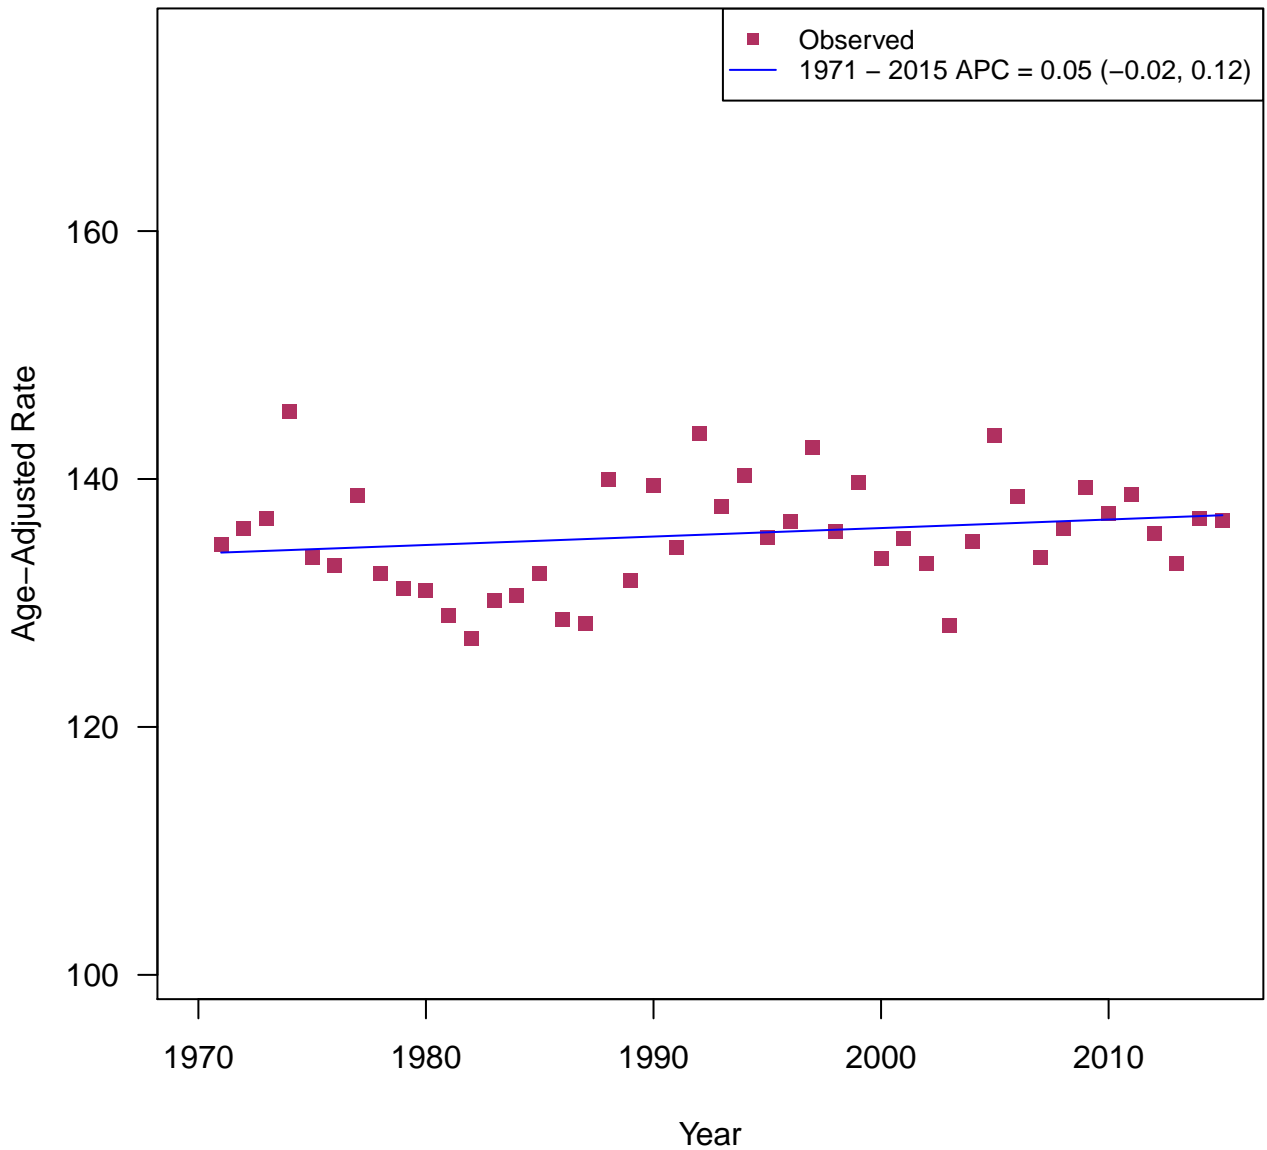

**Figure 67. Age-adjusted incidence rates of breast cancer in females aged 50–59 years in Canada, 1971–2015**

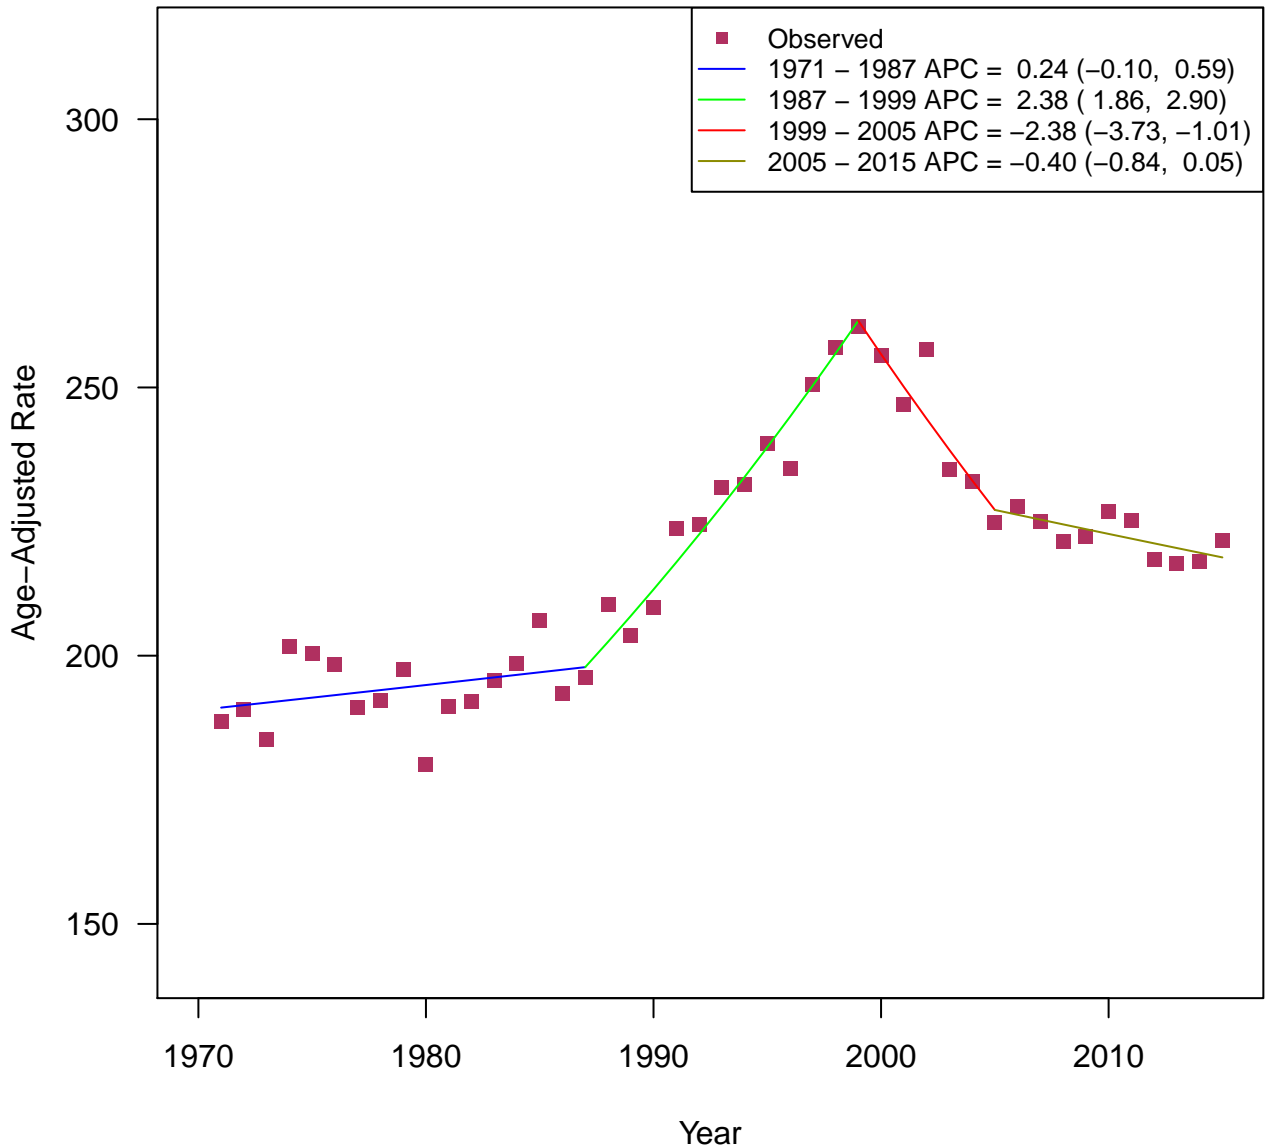



**Figure 68. Age-adjusted incidence rates of breast cancer in females aged 60–69 years in Canada, 1971–2015**

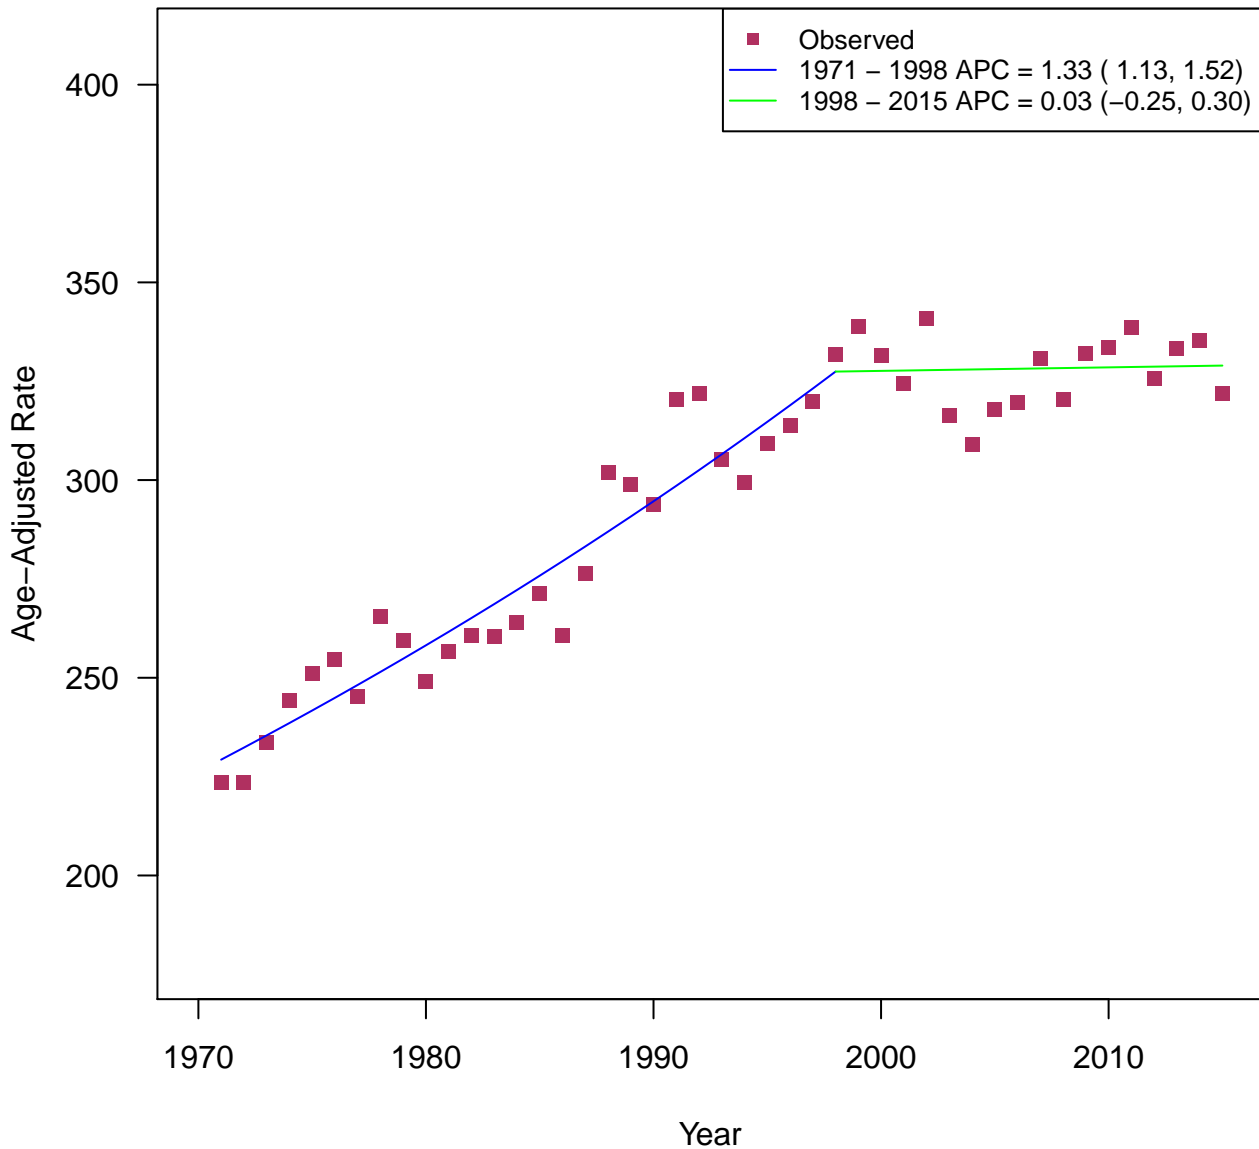

**Figure 69. Age-adjusted incidence rates of breast cancer in females aged 70–79 years in Canada, 1971–2015**

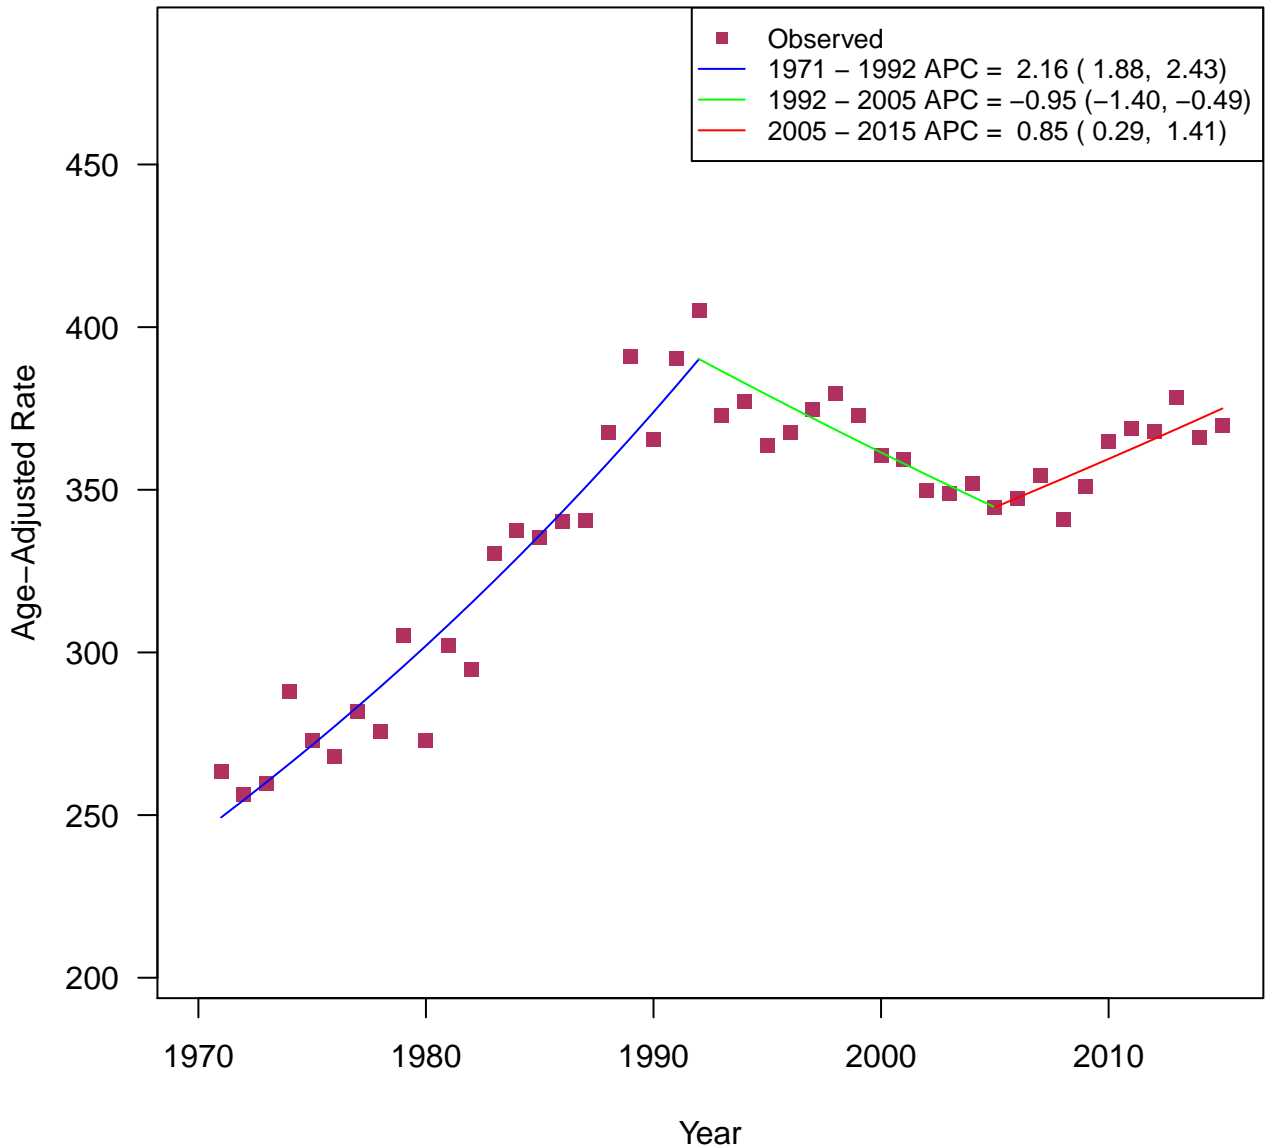

**Figure 70. Age-adjusted incidence rates of breast cancer in females aged 80–89 years in Canada, 1971–2015**

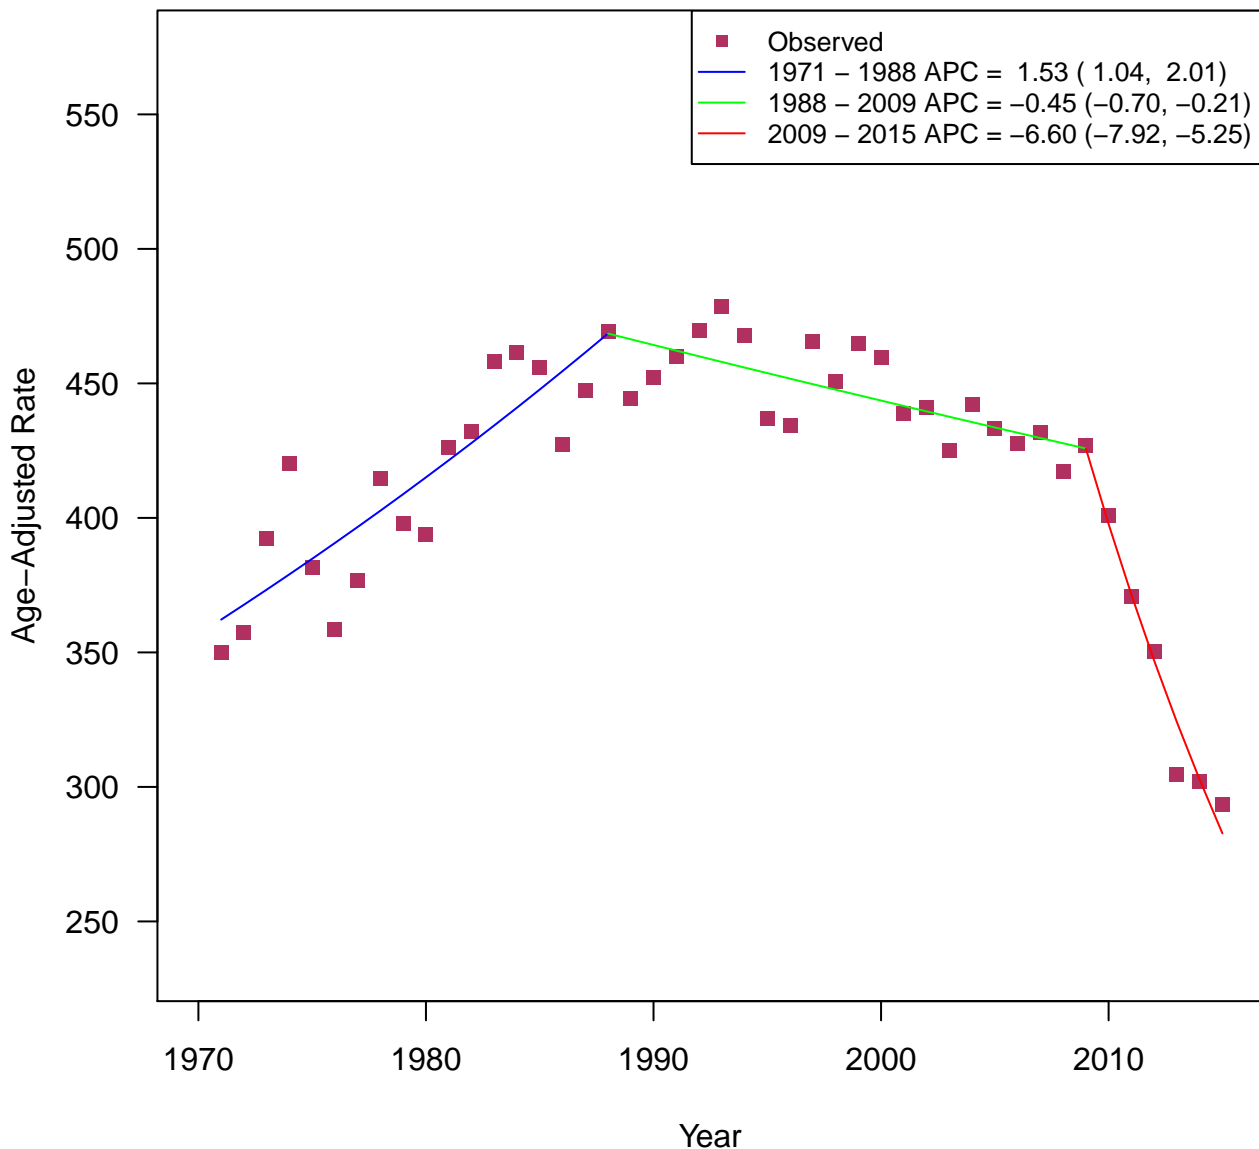

**Figure 71. Age-adjusted incidence rates of cervical cancer in females aged 20–29 years in Canada, 1971–2015**

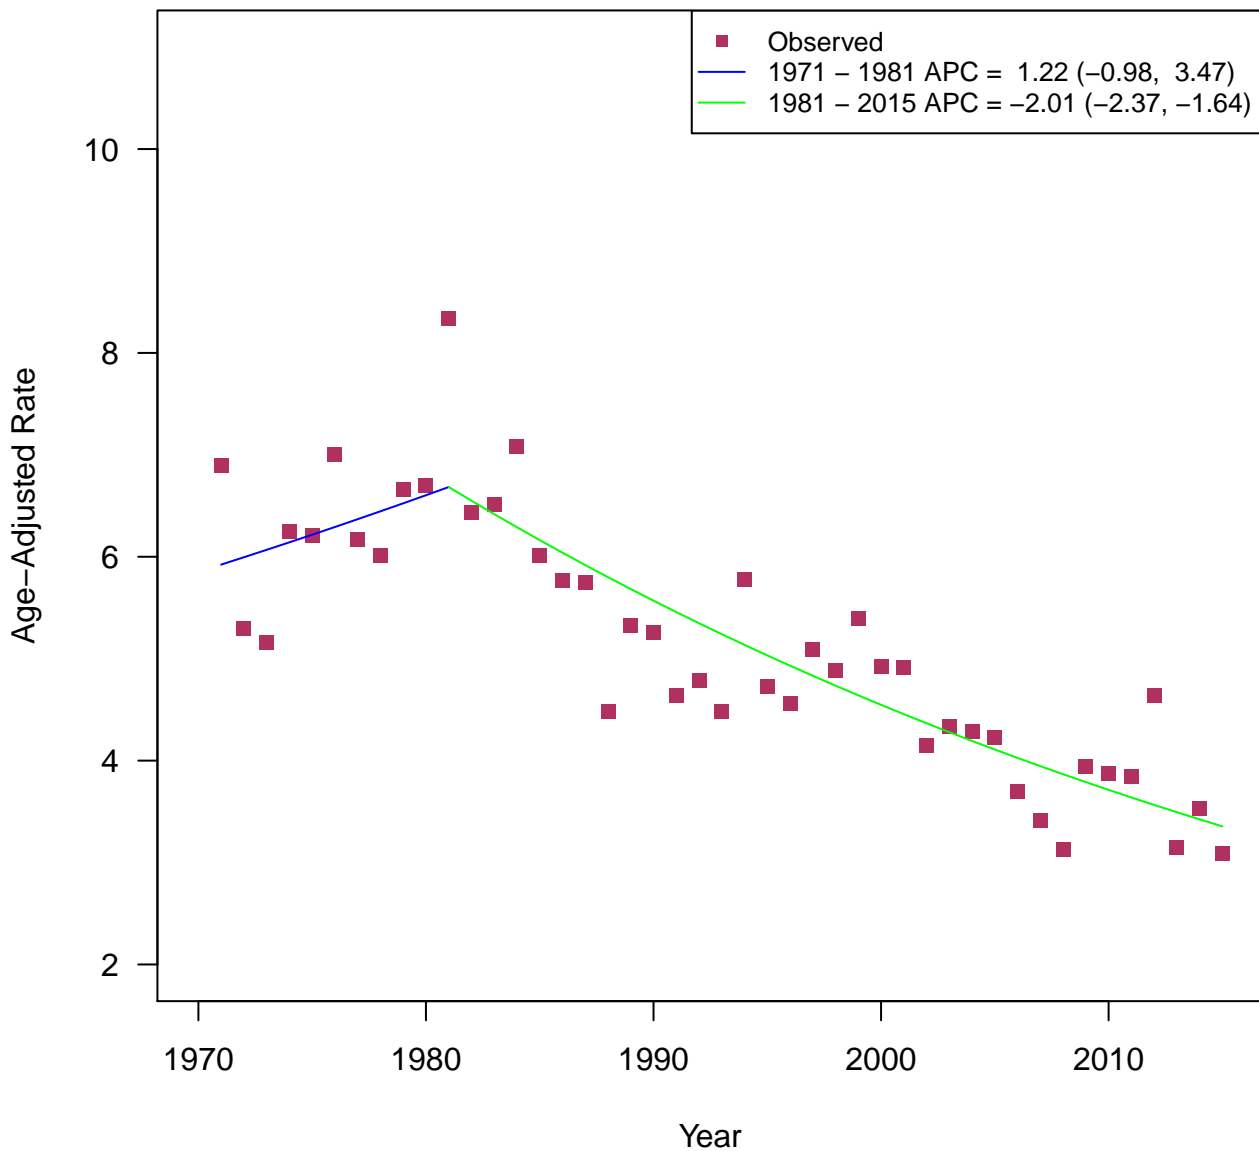

**Figure 72. Age-adjusted incidence rates of cervical cancer in females aged 20–39 years in Canada, 1971–2015**

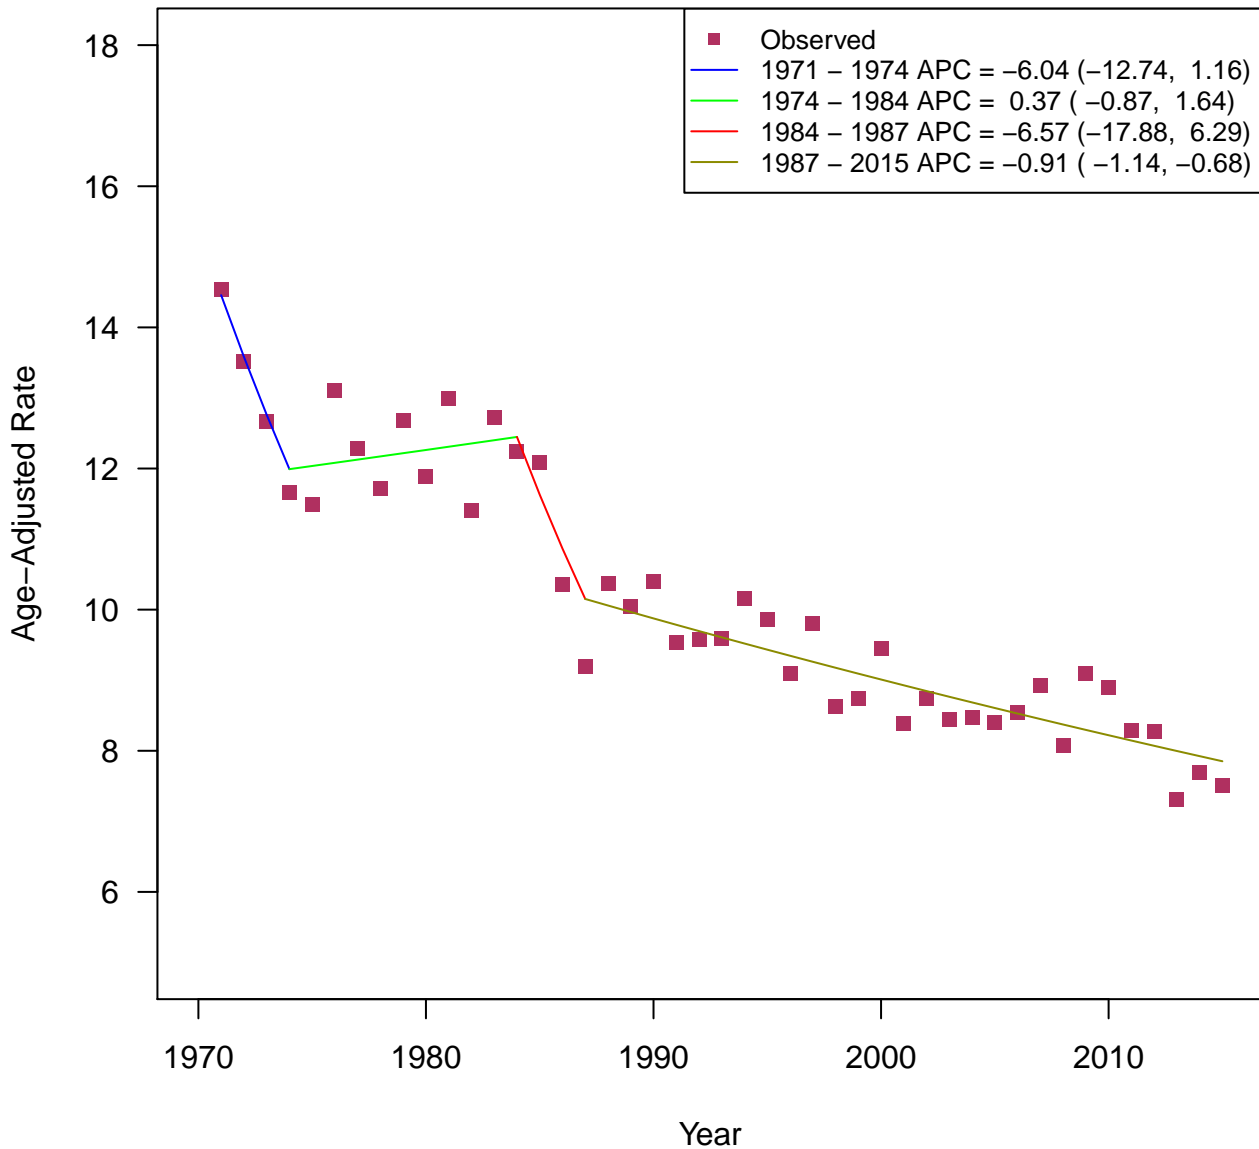

**Figure 73. Age-adjusted incidence rates of cervical cancer in females aged 30–39 years in Canada, 1971–2015**

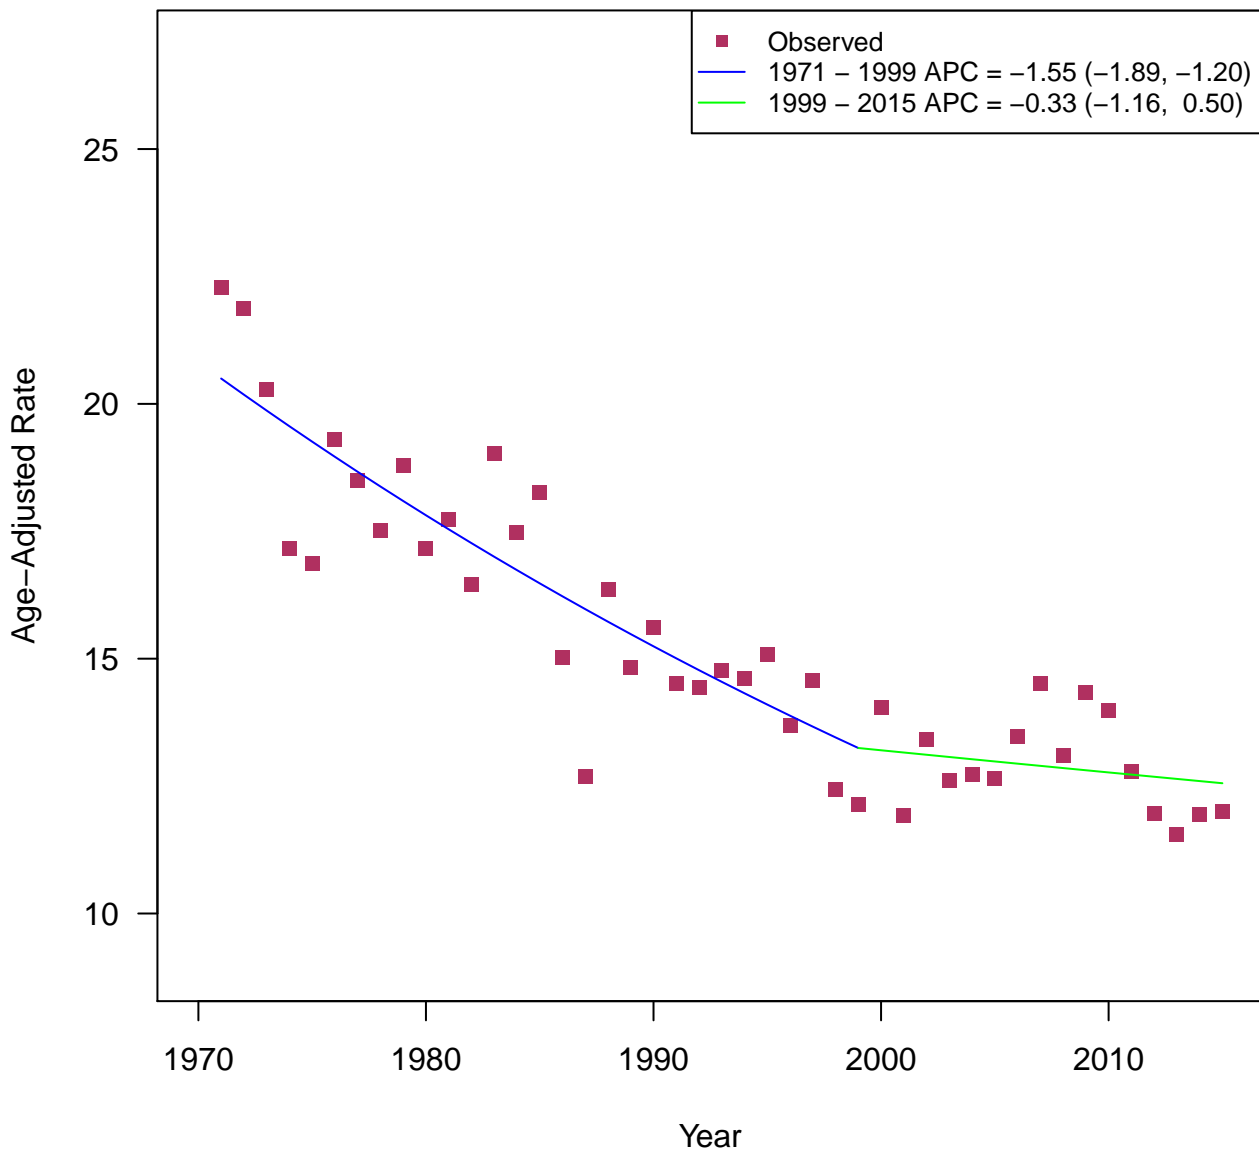

**Figure 74. Age-adjusted incidence rates of cervical cancer in females aged 40–49 years in Canada, 1971–2015**

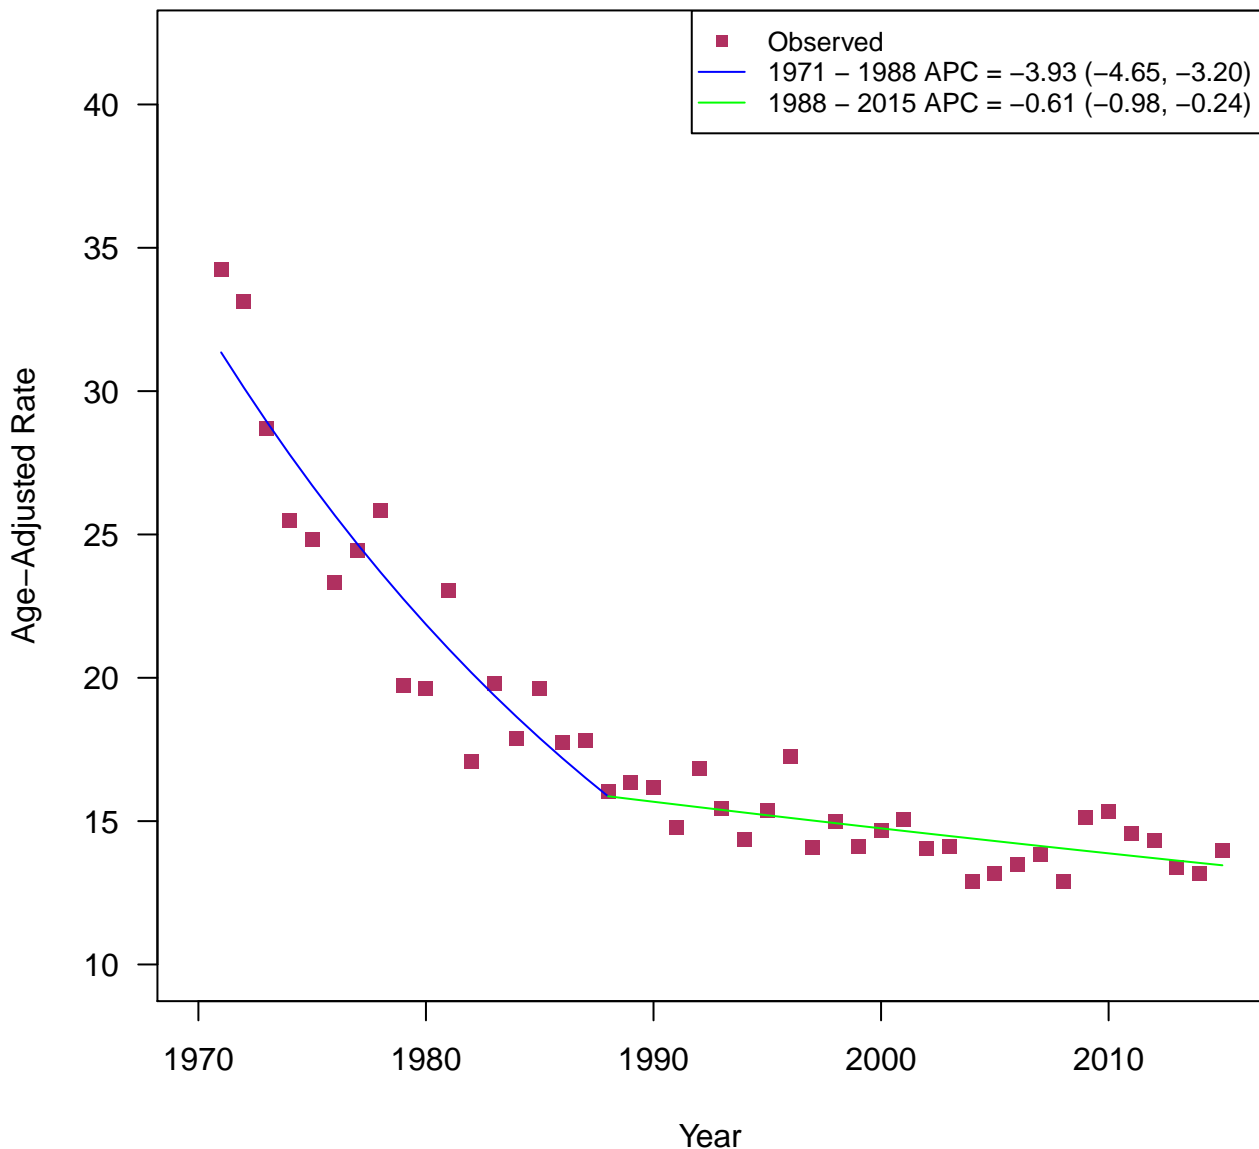

**Figure 75. Age-adjusted incidence rates of cervical cancer in females aged 50–59 years in Canada, 1971–2015**

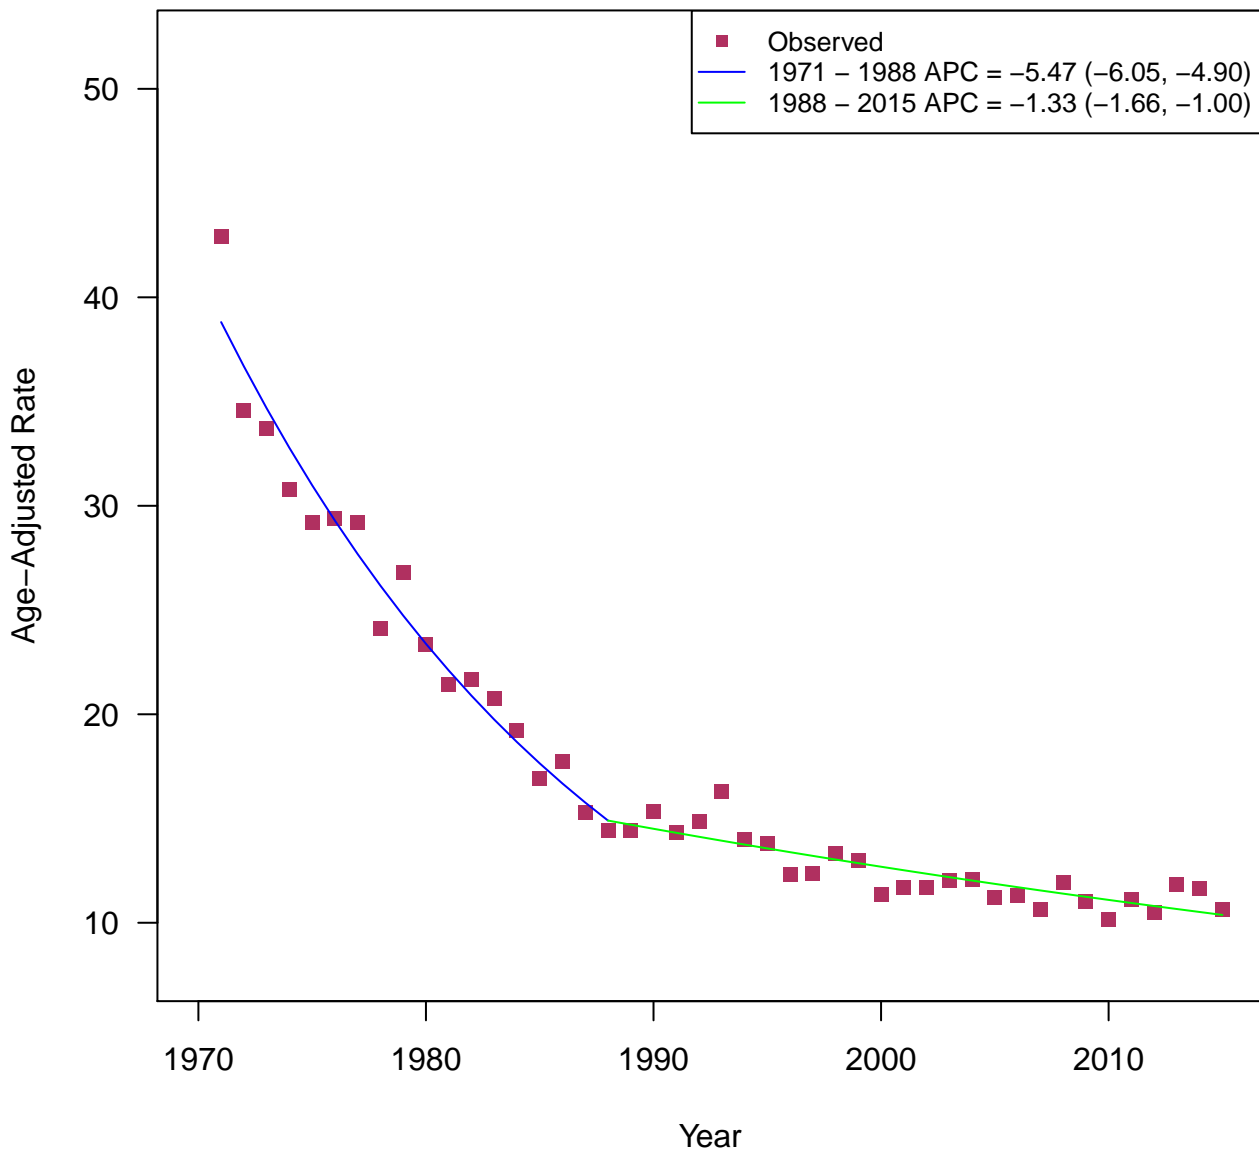



**Figure 76. Age-adjusted incidence rates of cervical cancer in females aged 60–69 years in Canada, 1971–2015**

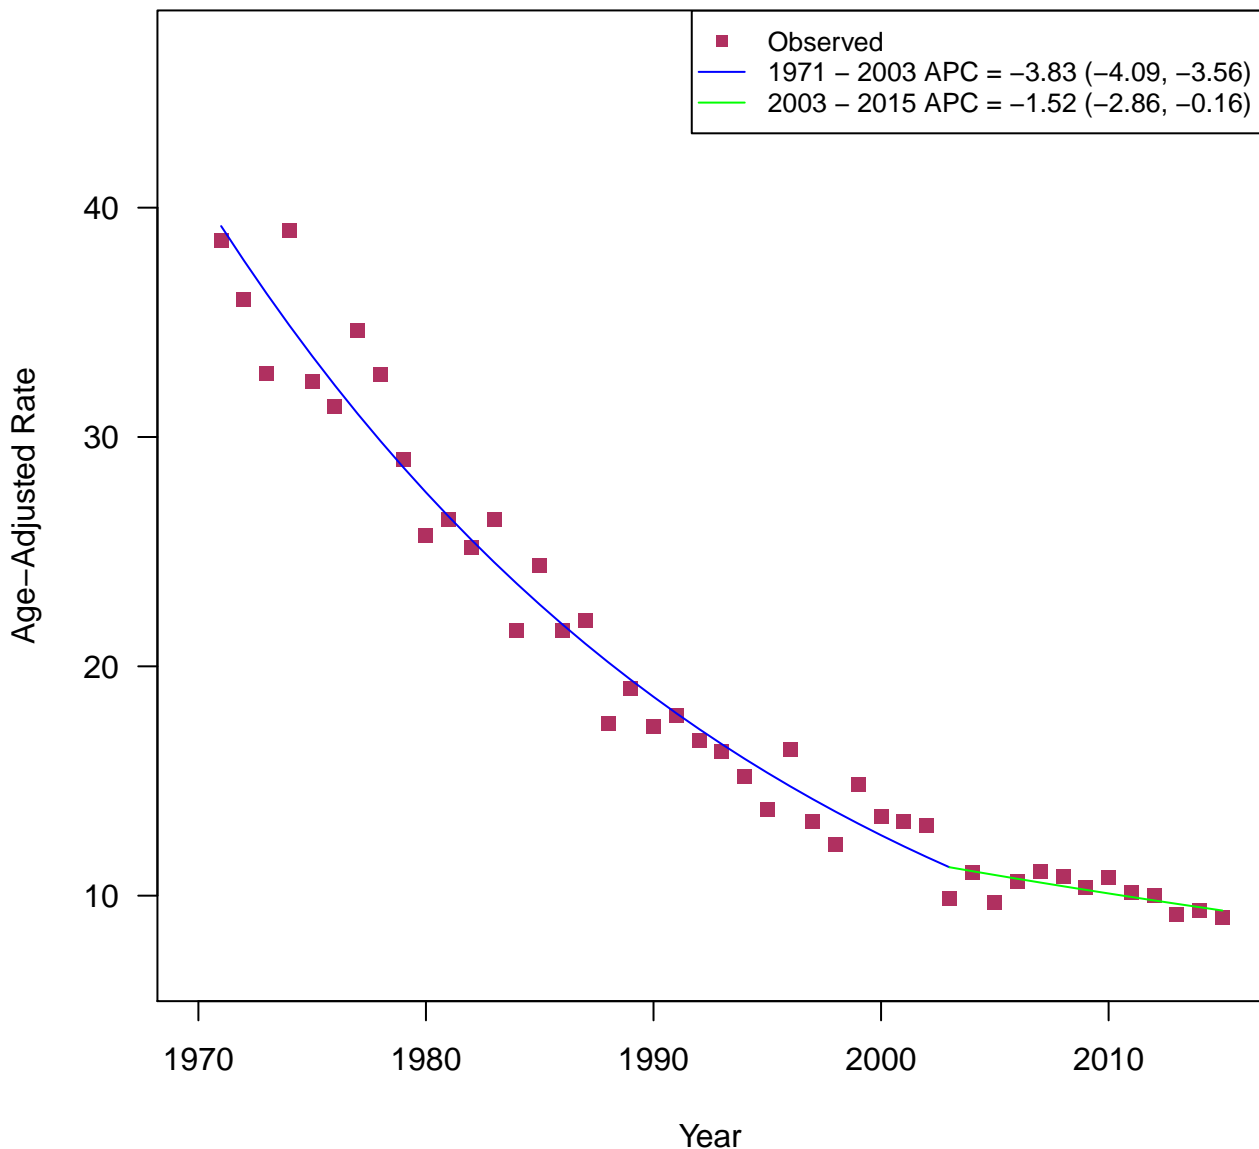

**Figure 77. Age-adjusted incidence rates of cervical cancer in females aged 70–79 years in Canada, 1971–2015**

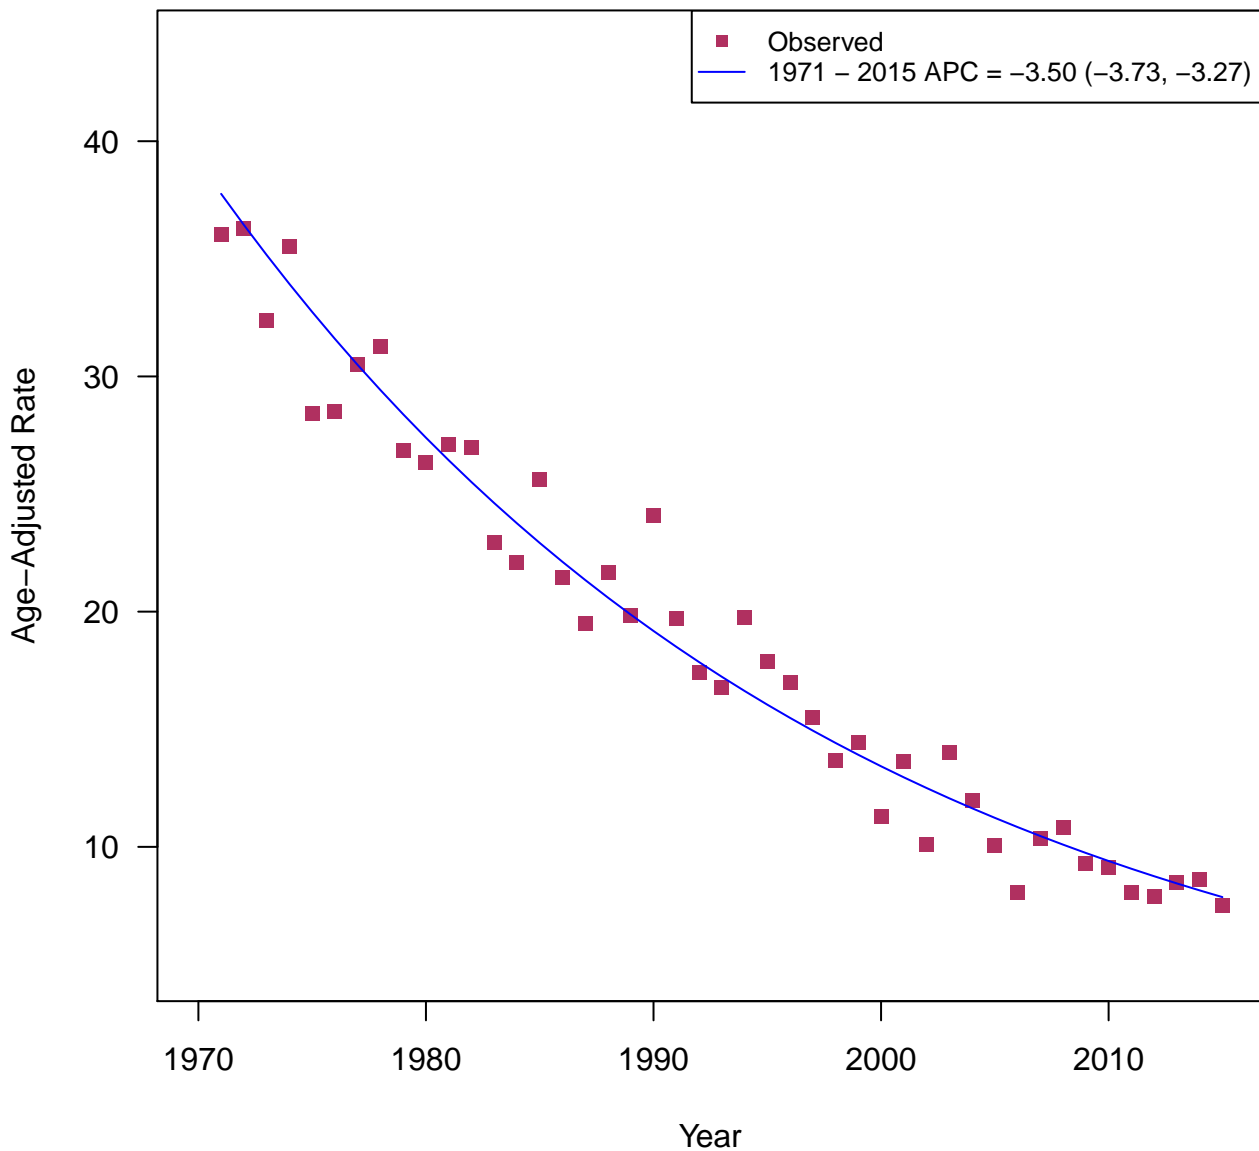

**Figure 78. Age-adjusted incidence rates of cervical cancer in females aged 80–89 years in Canada, 1971–2015**

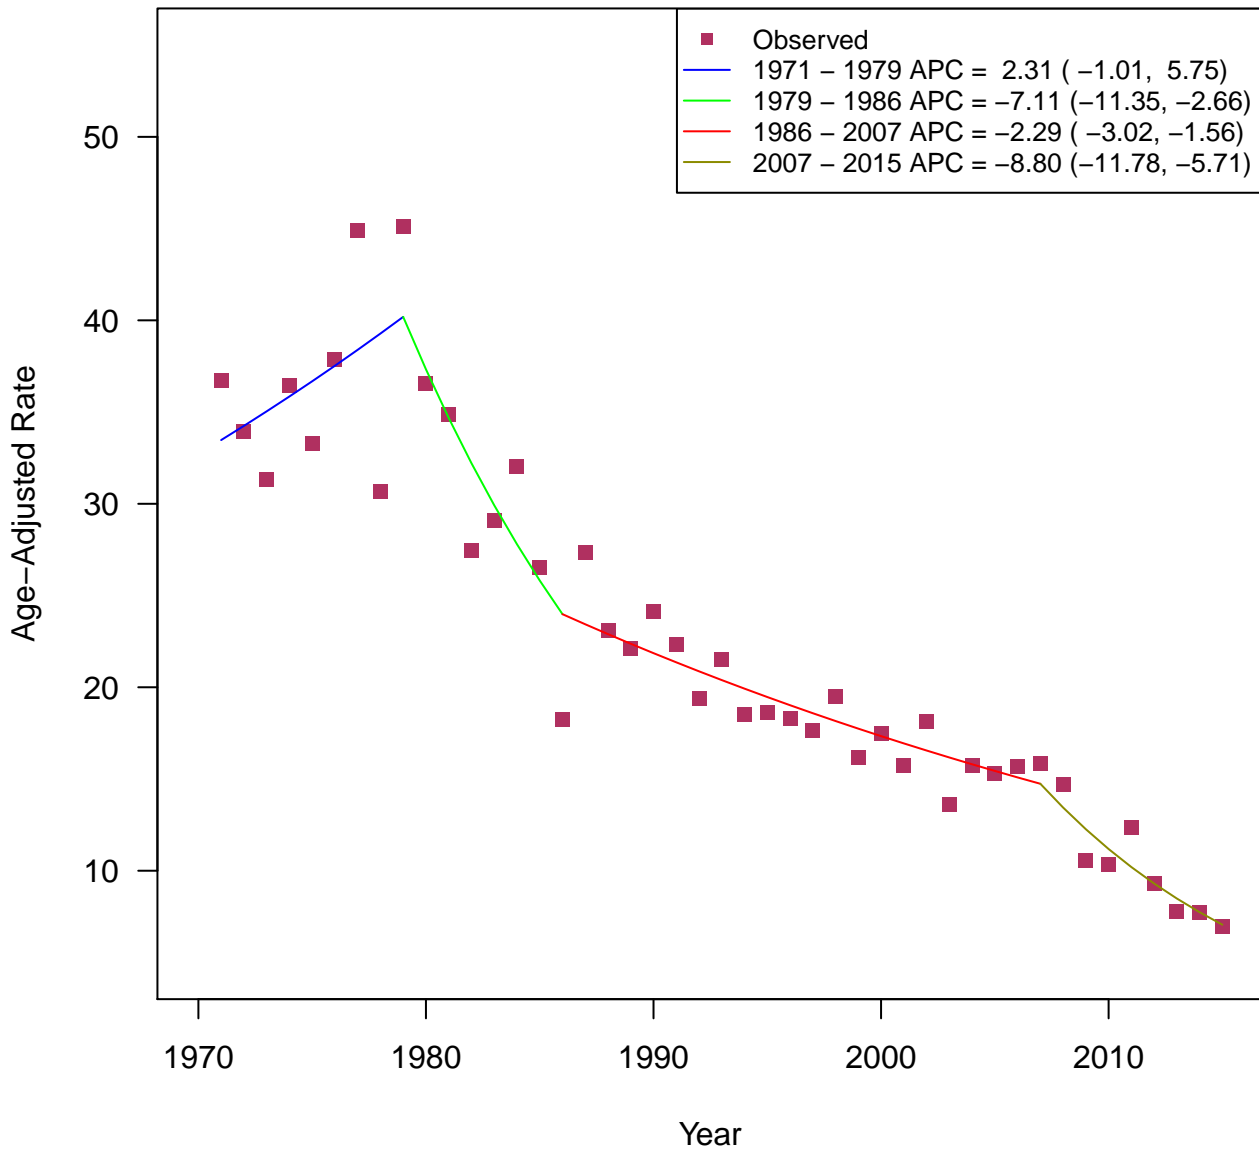

**Figure 79. Age-adjusted incidence rates of chronic myeloid leukemia in males aged 20–29 years in Canada, 1971–2015**

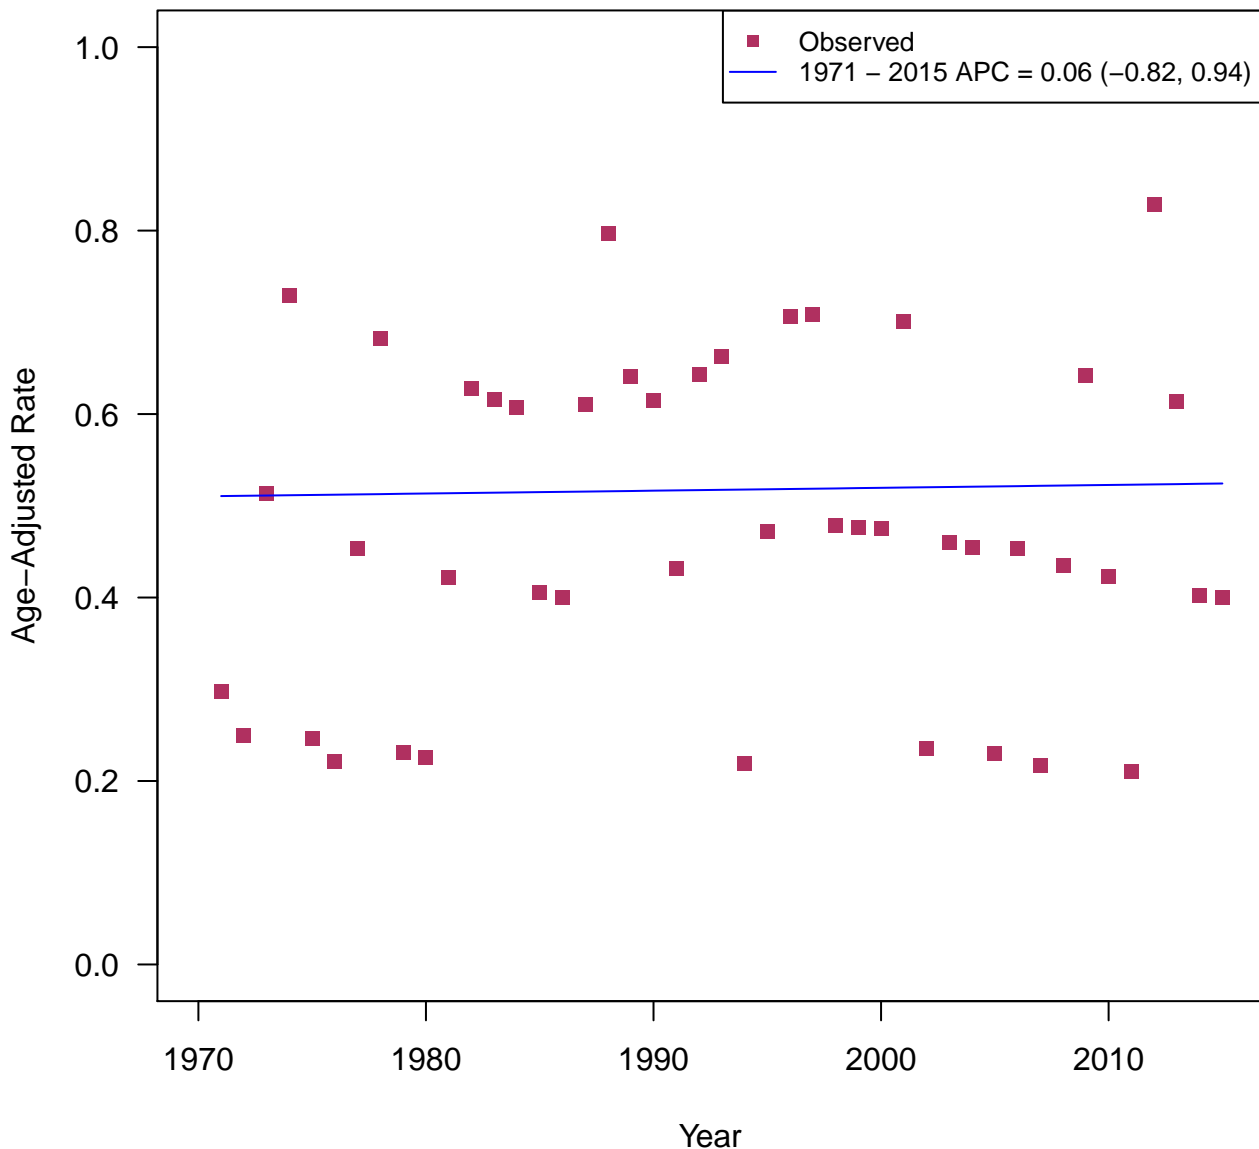

**Figure 80. Age-adjusted incidence rates of chronic myeloid leukemia in males aged 20–39 years in Canada, 1971–2015**

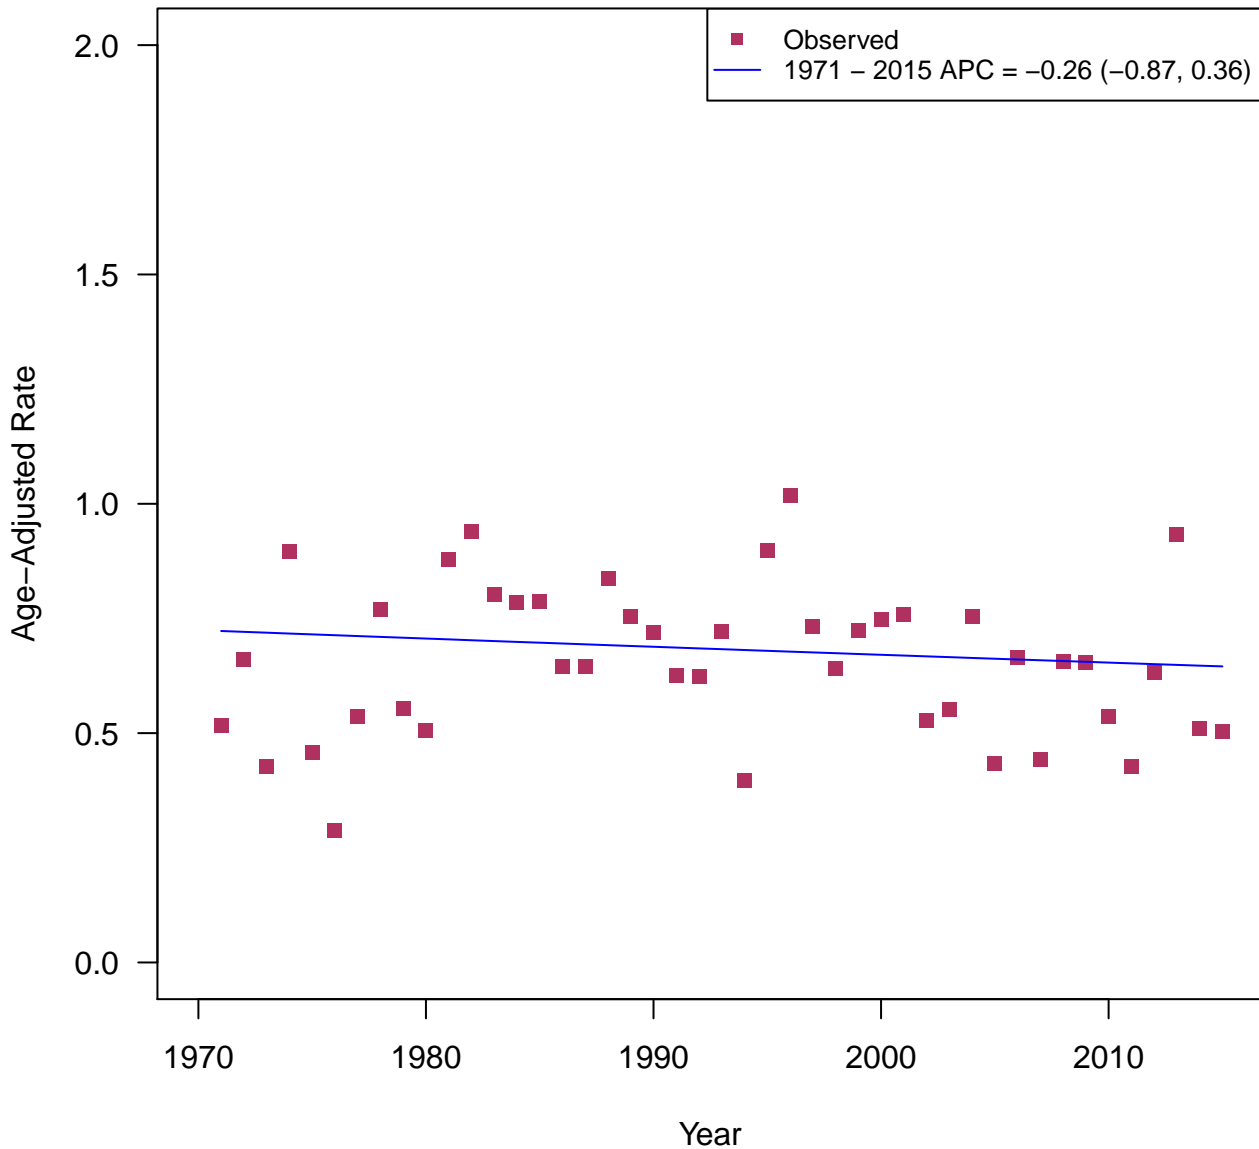

**Figure 81. Age-adjusted incidence rates of chronic myeloid leukemia in males aged 20–49 years in Canada, 1971–2015**

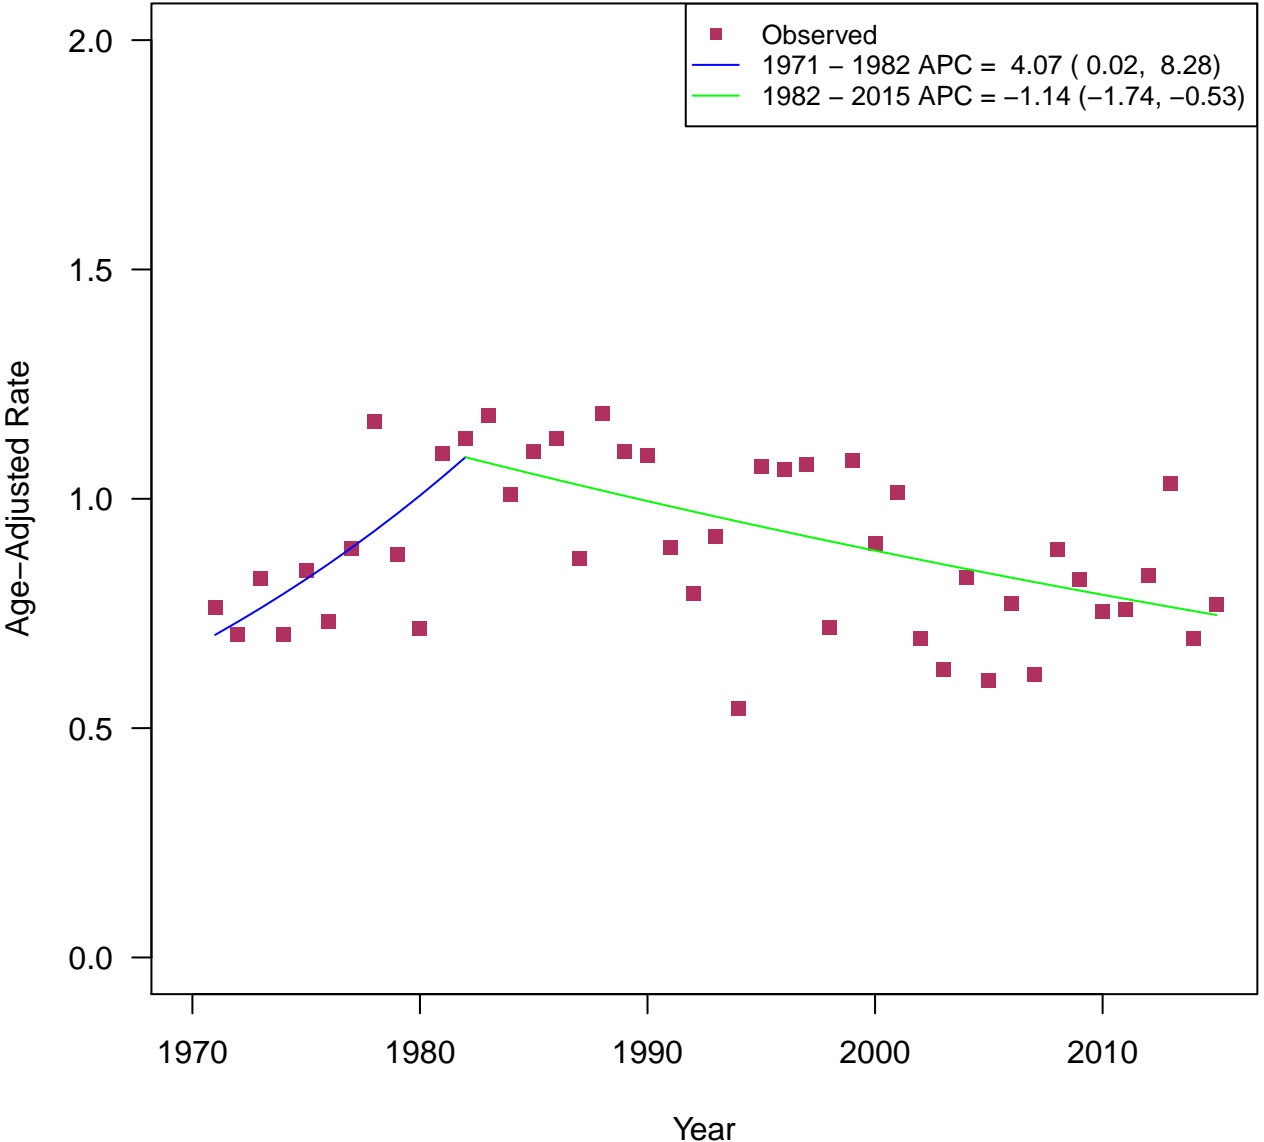

**Figure 82. Age-adjusted incidence rates of chronic myeloid leukemia in males aged 30–39 years in Canada, 1971–2015**

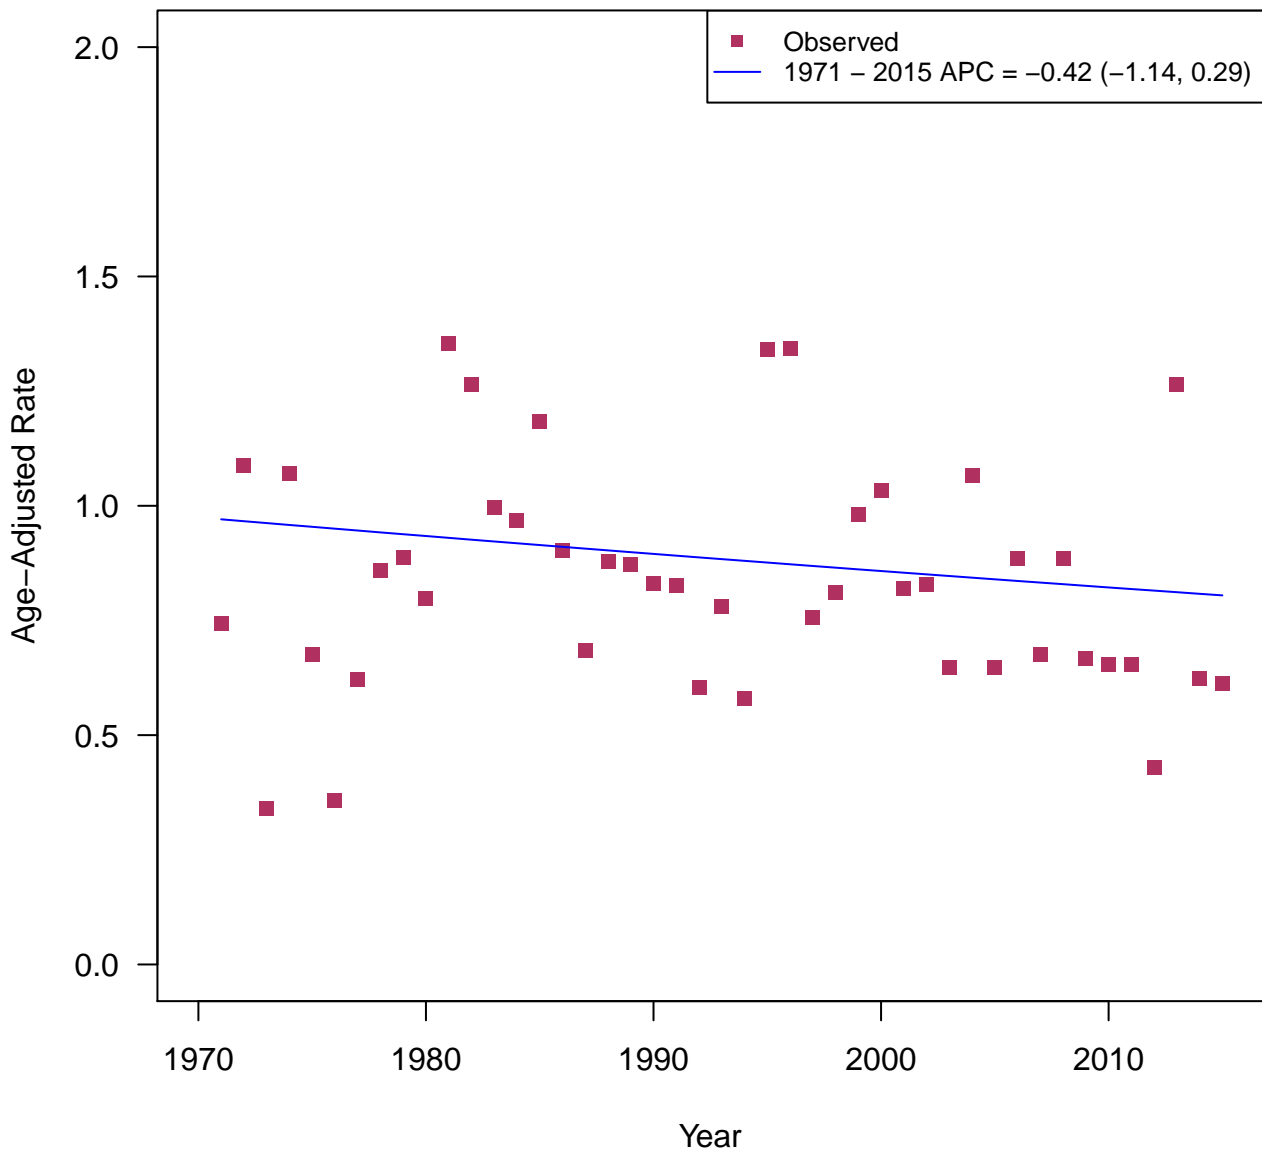

**Figure 83. Age-adjusted incidence rates of chronic myeloid leukemia in males aged 40–49 years in Canada, 1971–2015**

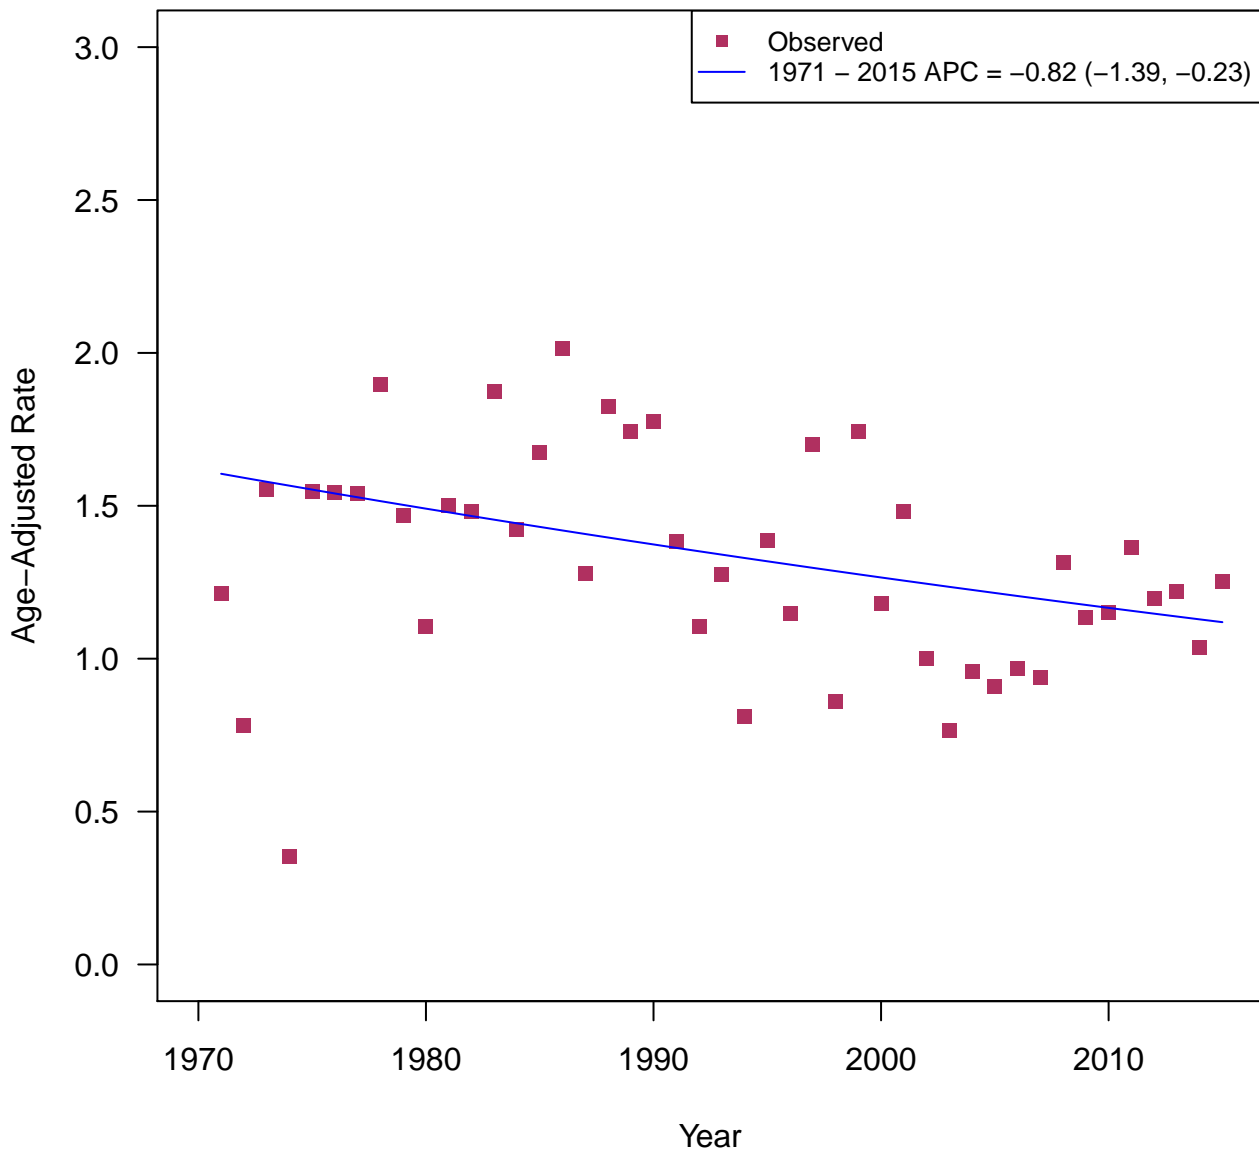



**Figure 84. Age-adjusted incidence rates of chronic myeloid leukemia in males aged 50–59 years in Canada, 1971–2015**

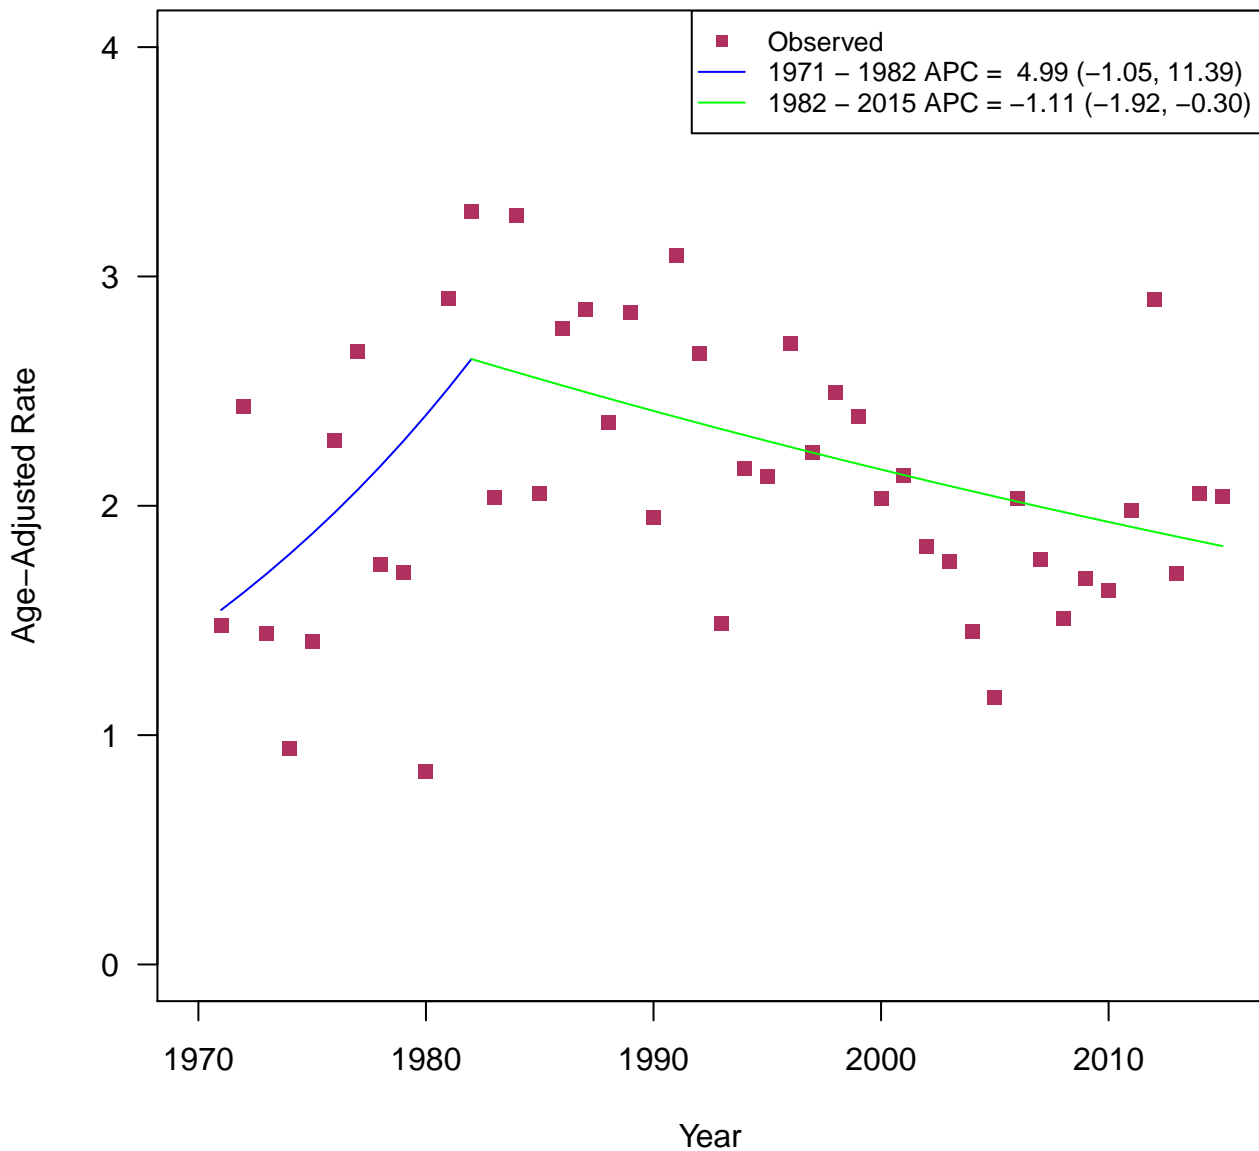

**Figure 85. Age-adjusted incidence rates of chronic myeloid leukemia in males aged 60–69 years in Canada, 1971–2015**

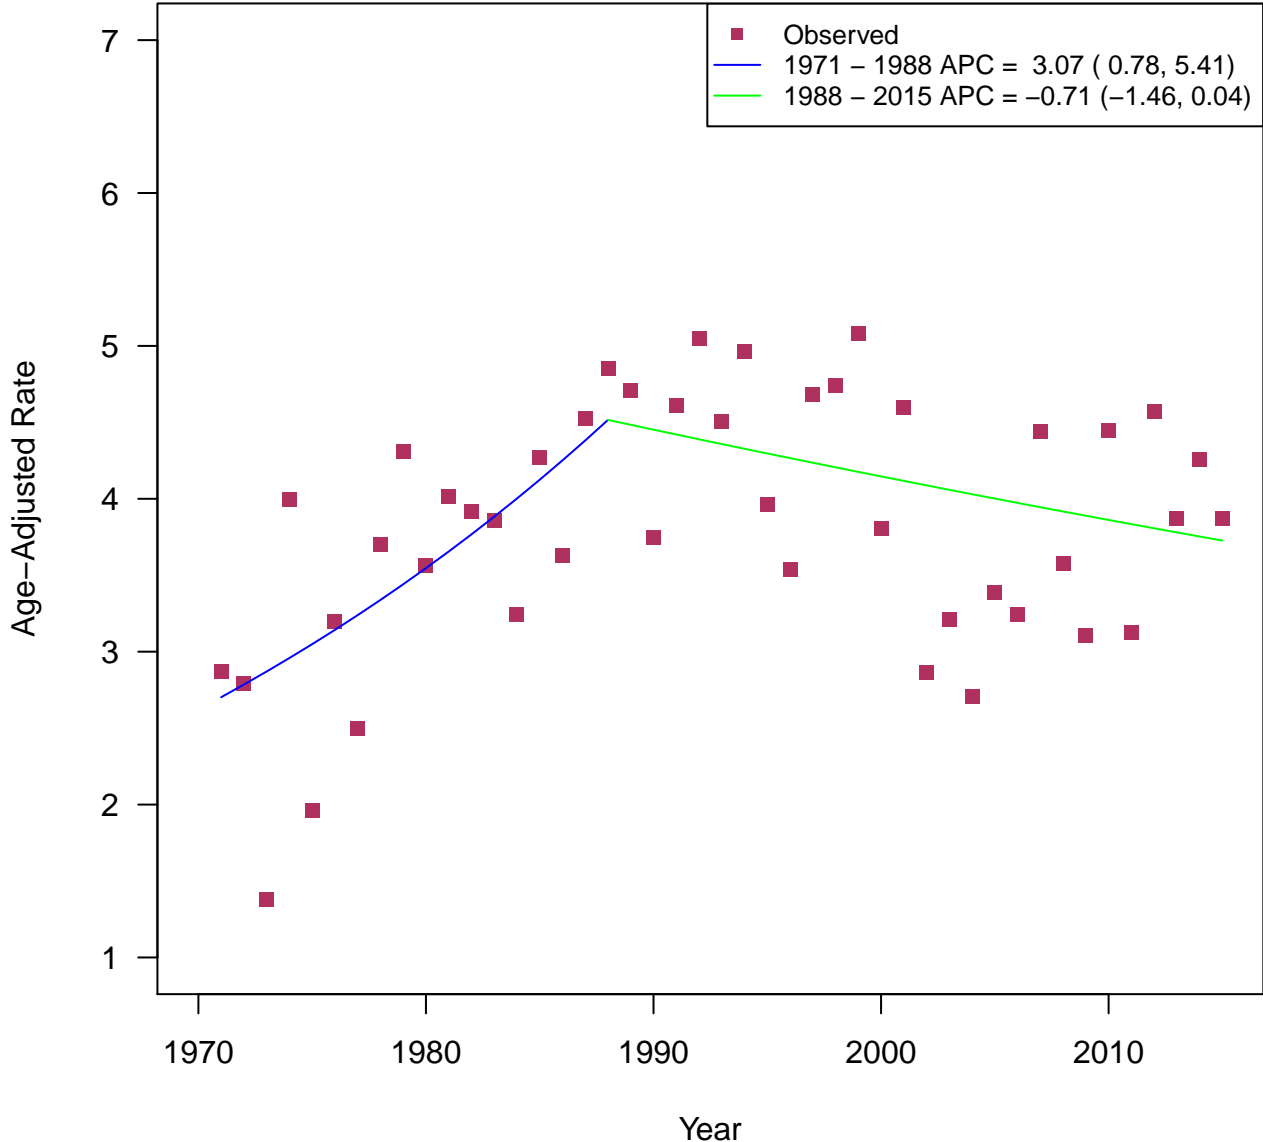

**Figure 86. Age-adjusted incidence rates of chronic myeloid leukemia in males aged 70–79 years in Canada, 1971–2015**

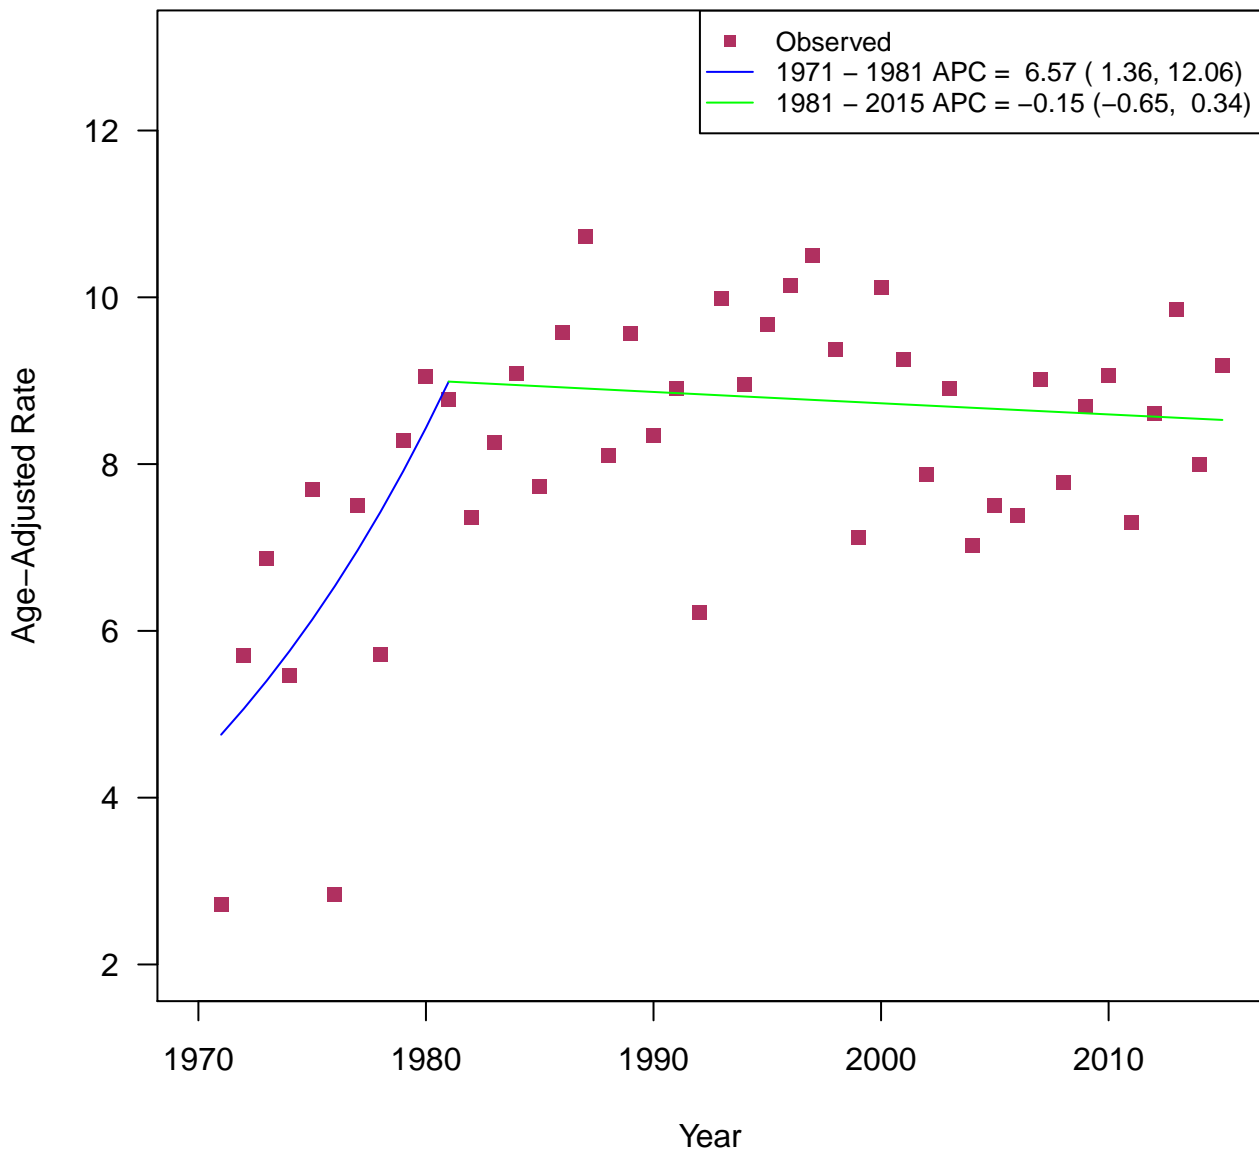

**Figure 87. Age-adjusted incidence rates of chronic myeloid leukemia in males aged 80–89 years in Canada, 1971–2015**

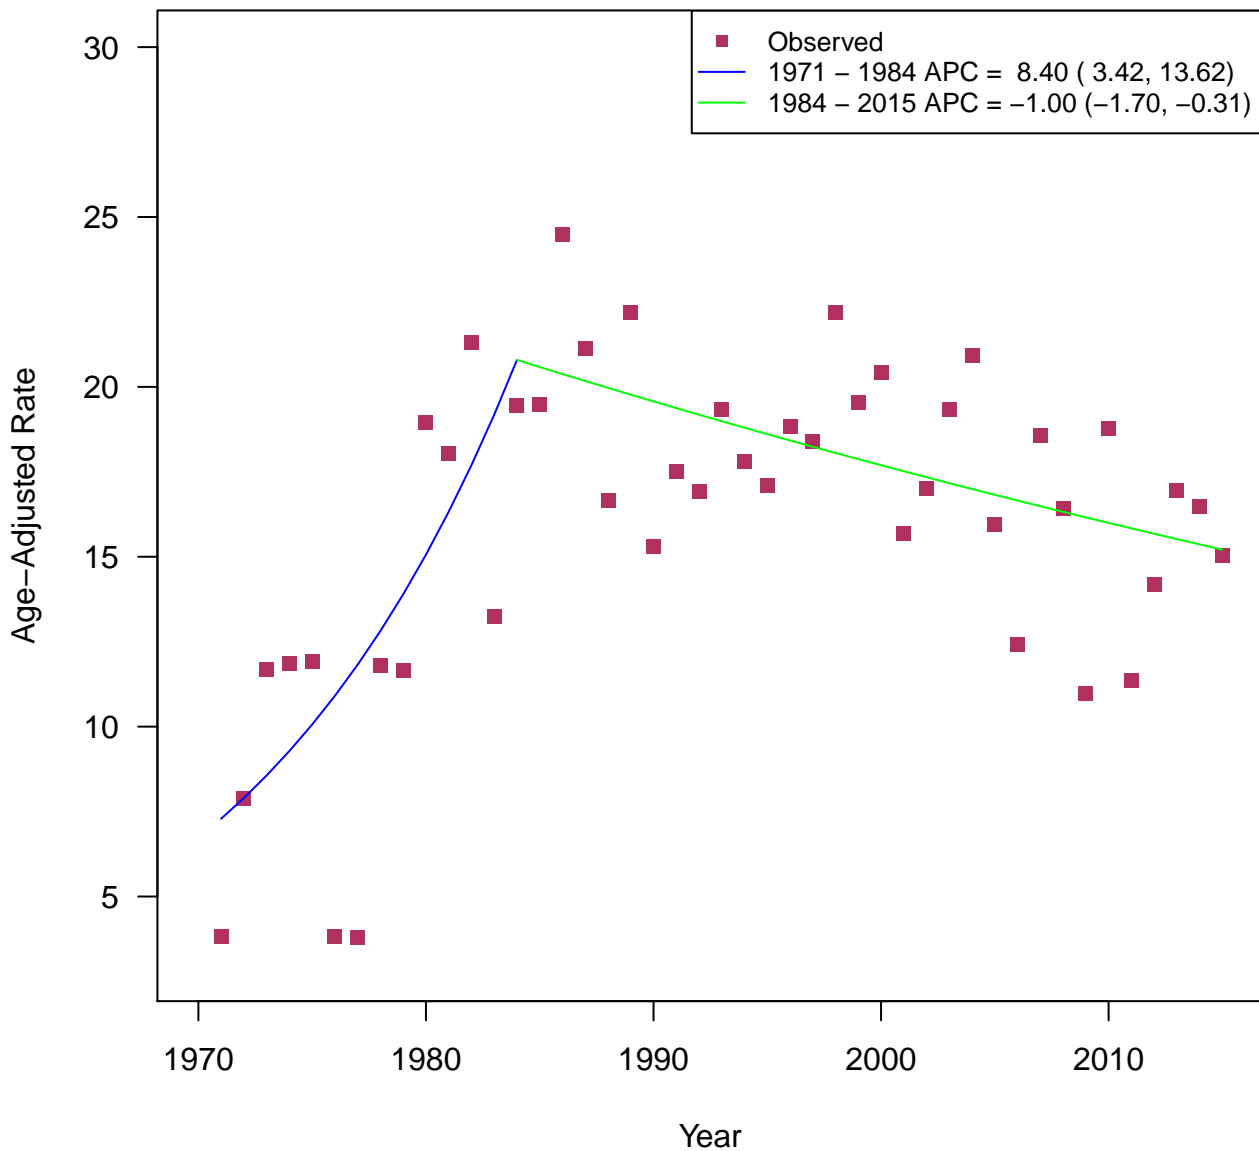

**Figure 88. Age-adjusted incidence rates of chronic myeloid leukemia in females aged 20–29 years in Canada, 1971–2015**

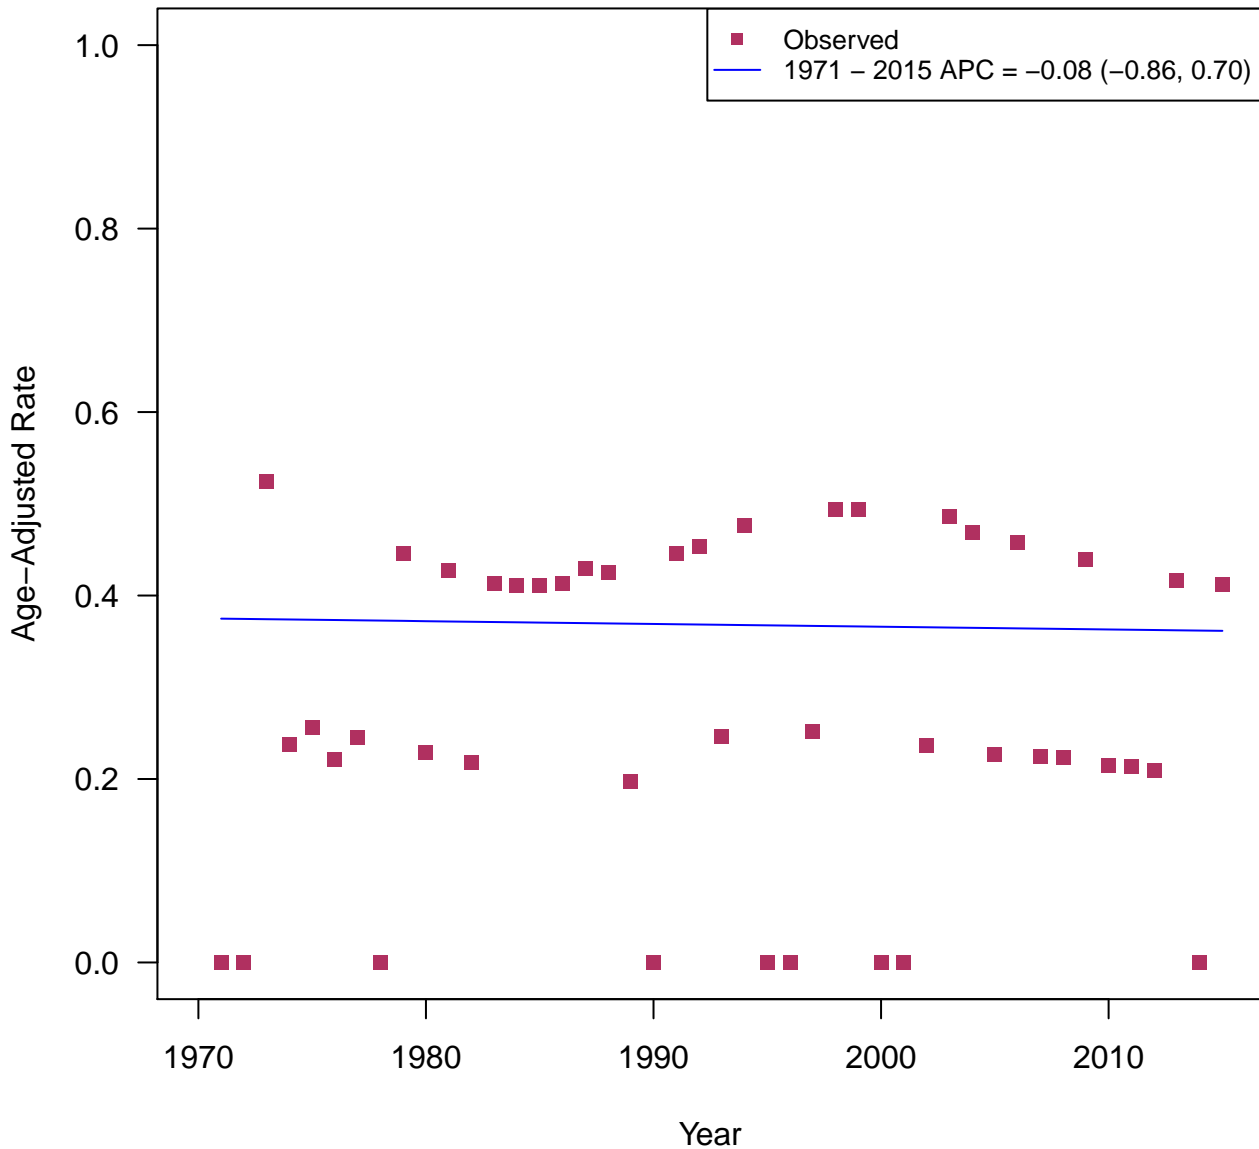

**Figure 89. Age-adjusted incidence rates of chronic myeloid leukemia in females aged 20–39 years in Canada, 1971–2015**

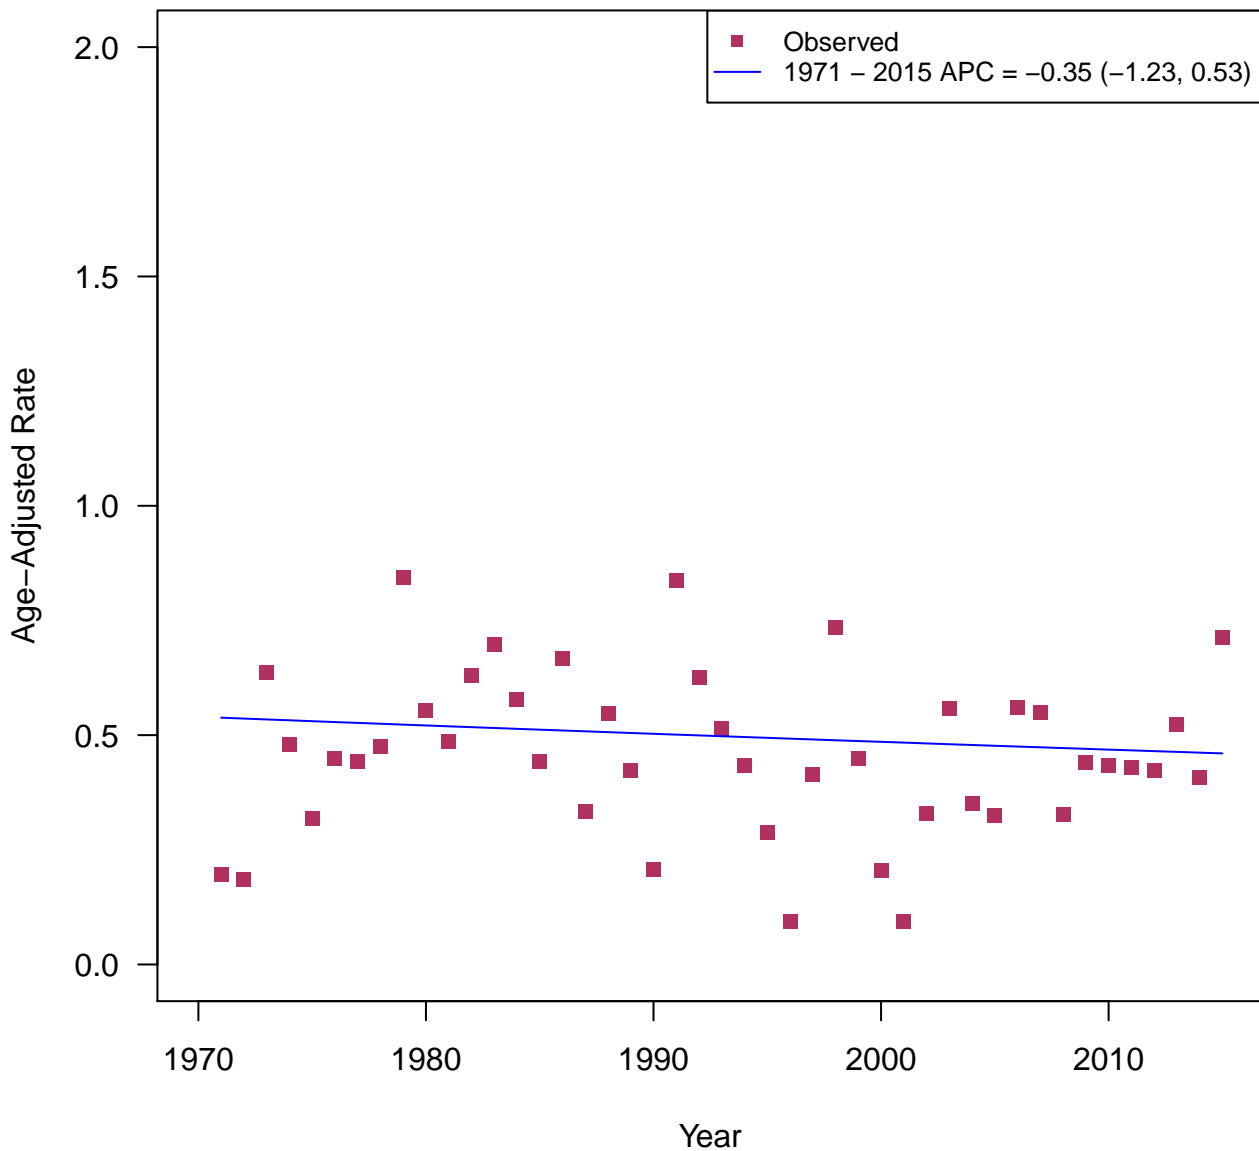

**Figure 90. Age-adjusted incidence rates of chronic myeloid leukemia in females aged 30–39 years in Canada, 1971–2015**

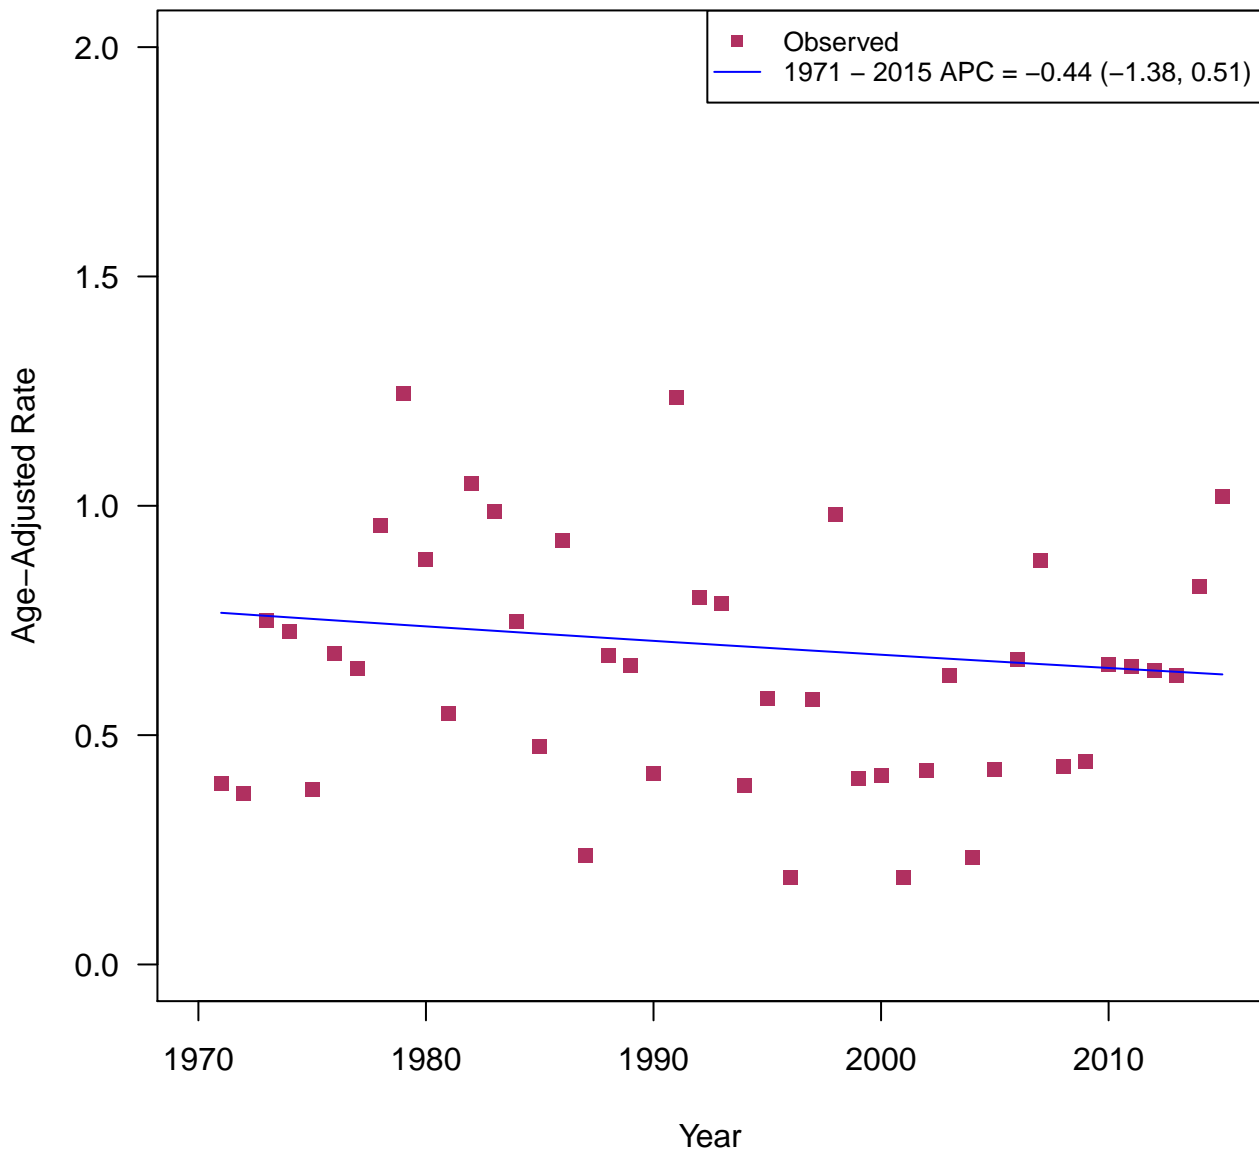

**Figure 91. Age-adjusted incidence rates of chronic myeloid leukemia in females aged 40–49 years in Canada, 1971–2015**

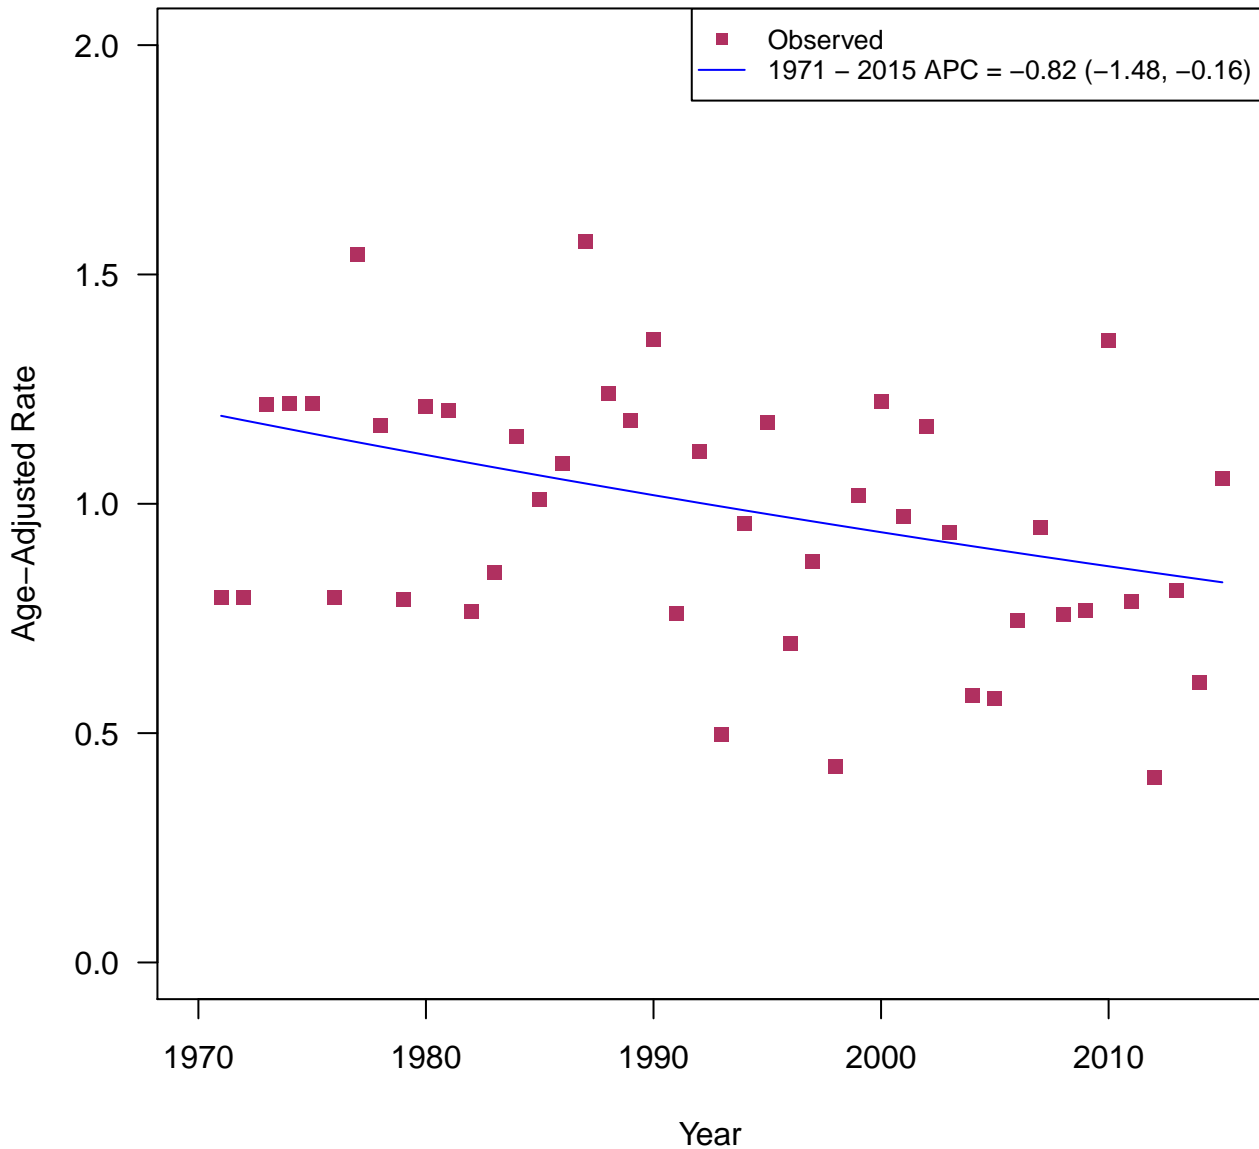



**Figure 92. Age-adjusted incidence rates of chronic myeloid leukemia in females aged 50–59 years in Canada, 1971–2015**

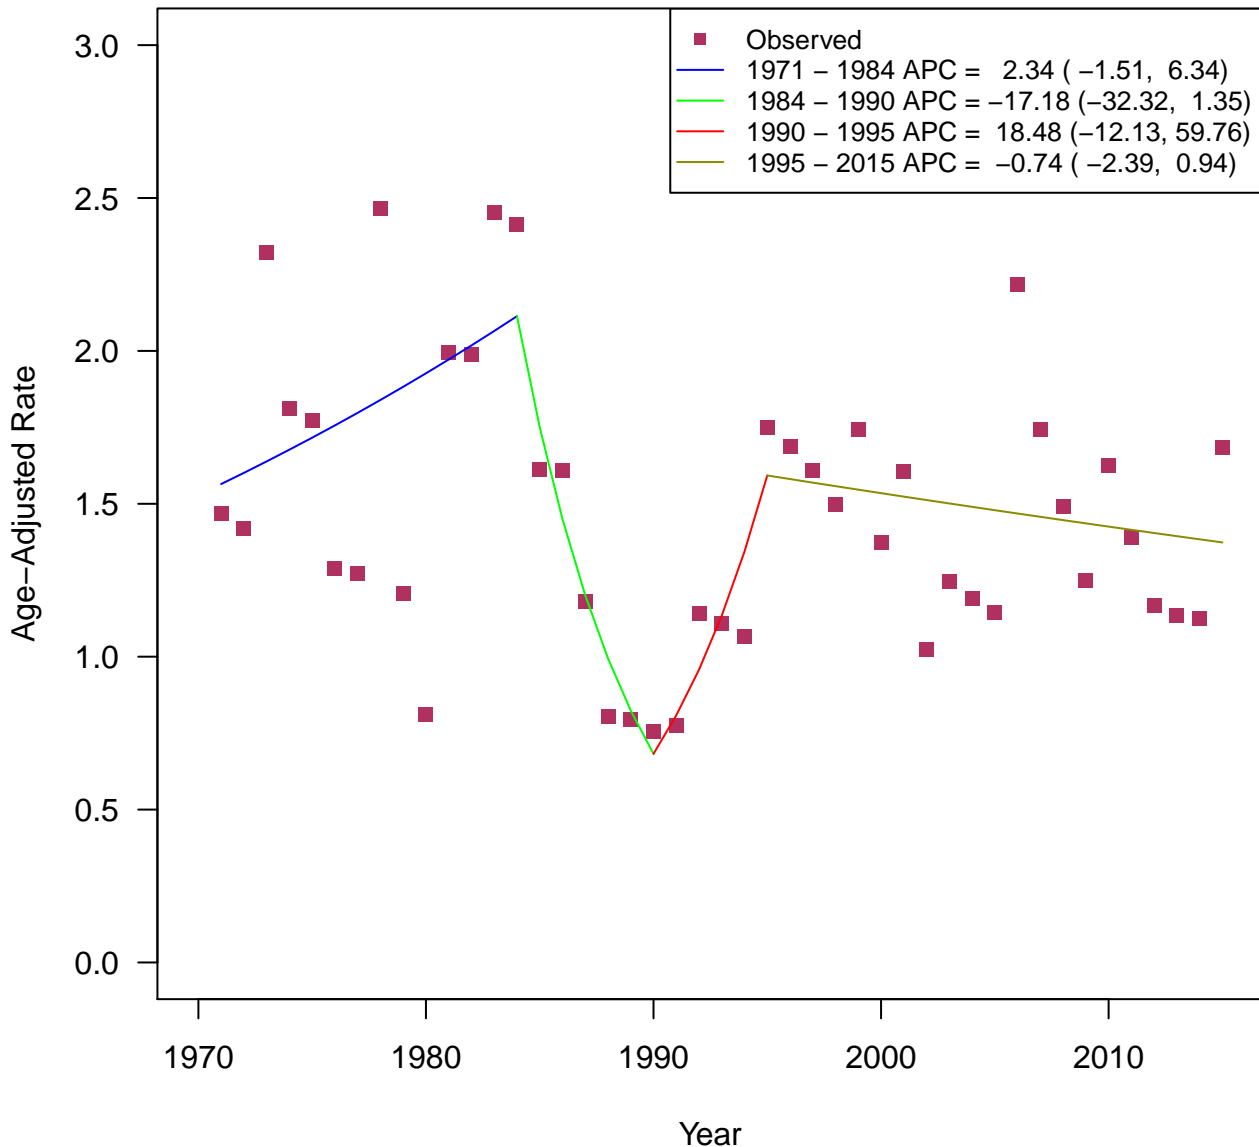

**Figure 93. Age-adjusted incidence rates of chronic myeloid leukemia in females aged 60–69 years in Canada, 1971–2015**

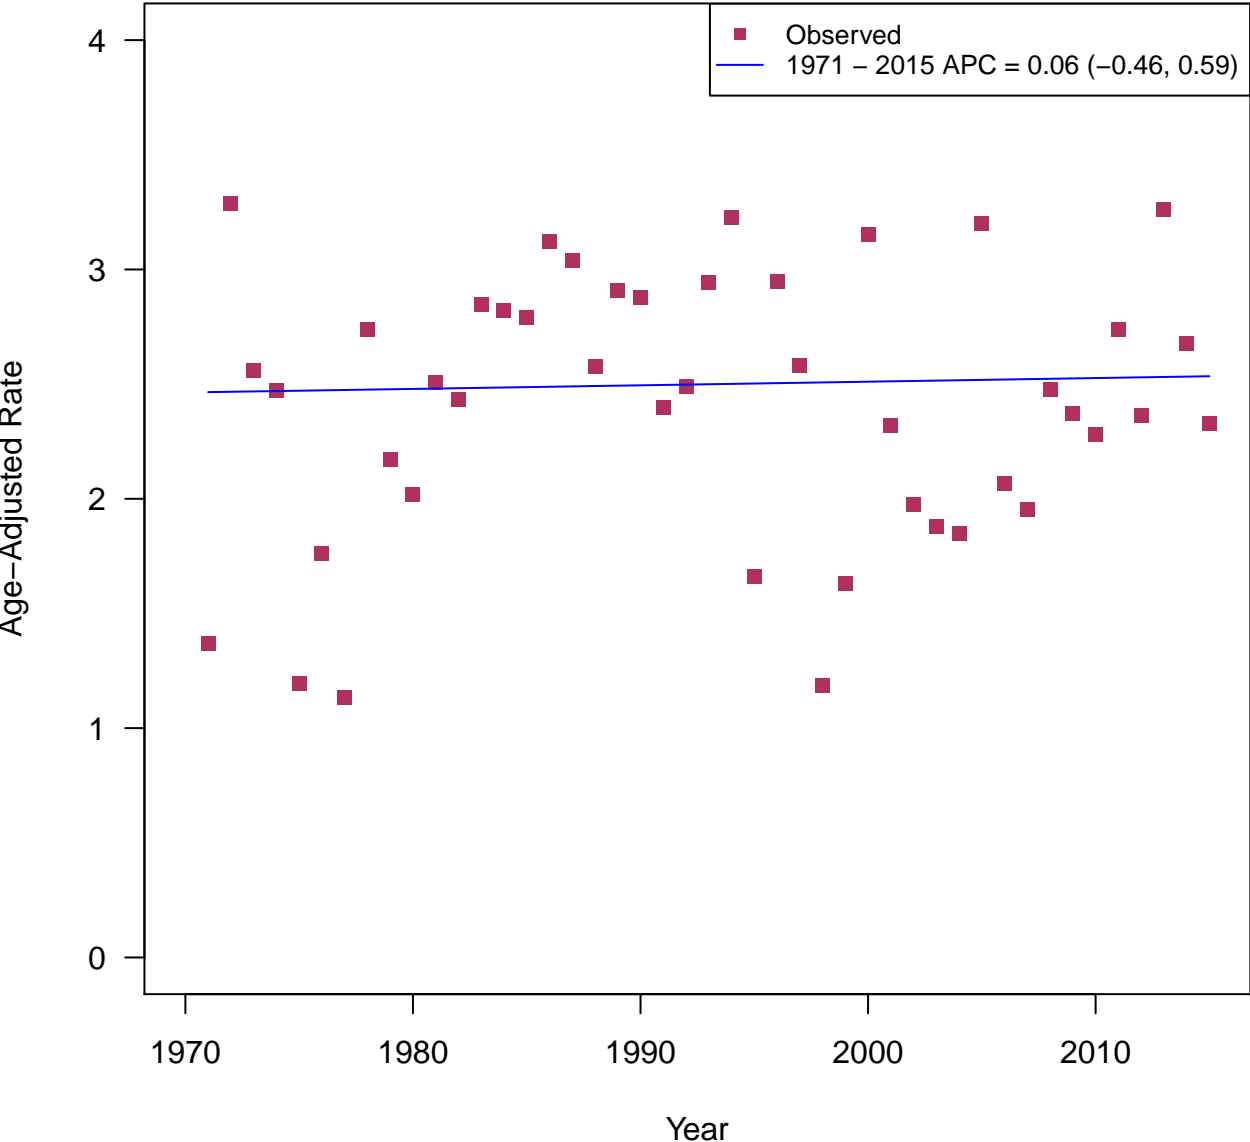

**Figure 94. Age-adjusted incidence rates of chronic myeloid leukemia in females aged 70–79 years in Canada, 1971–2015**

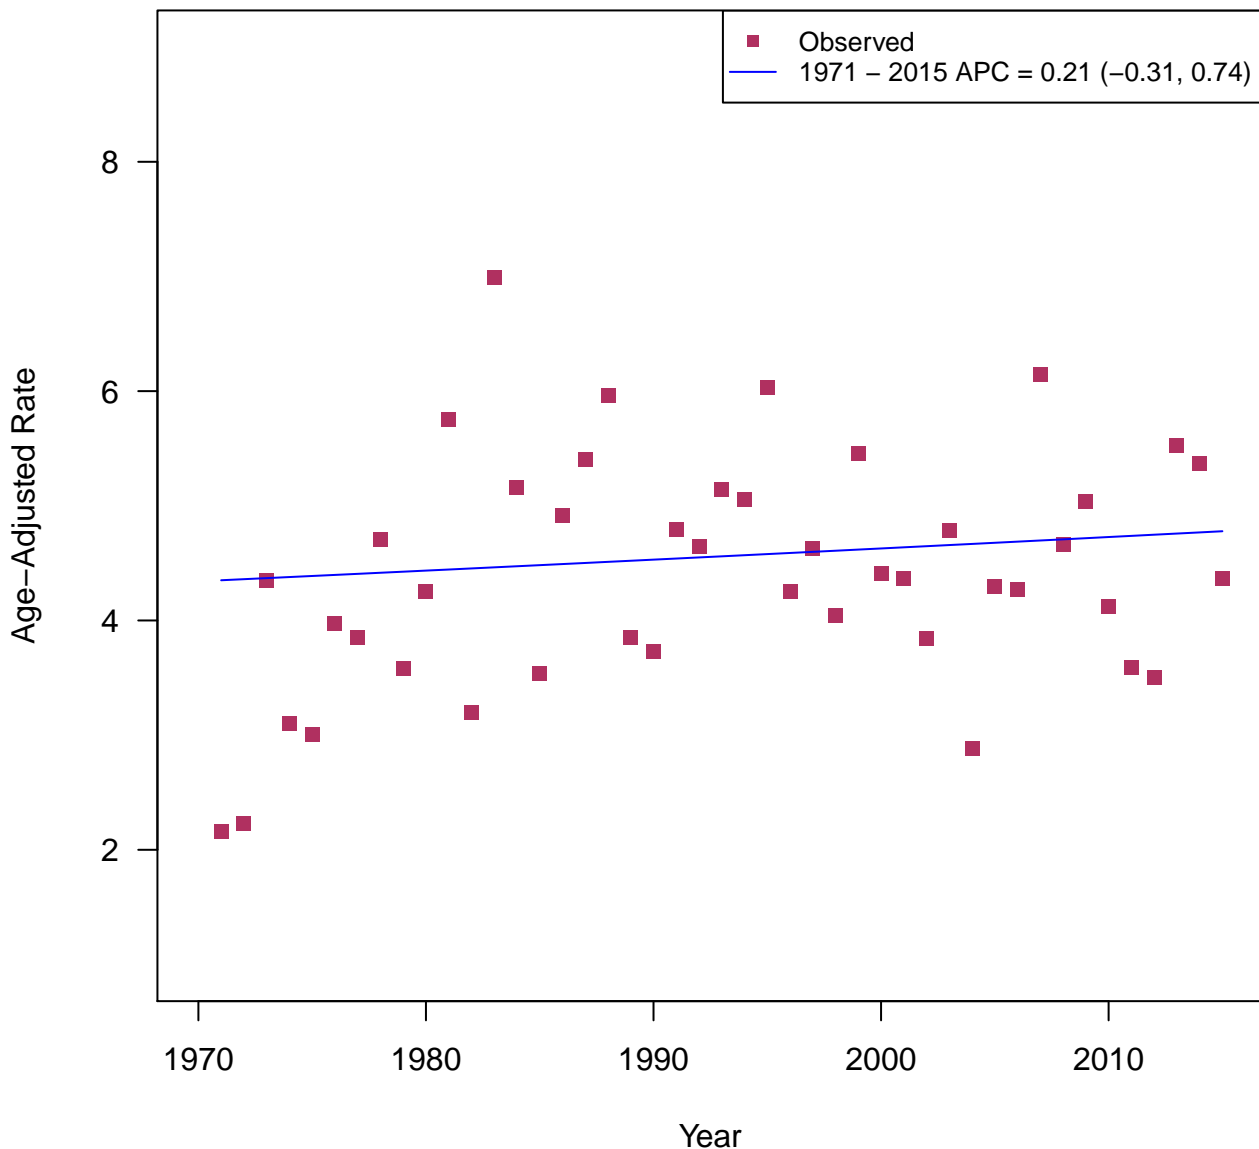

**Figure 95. Age-adjusted incidence rates of chronic myeloid leukemia in females aged 80–89 years in Canada, 1971–2015**

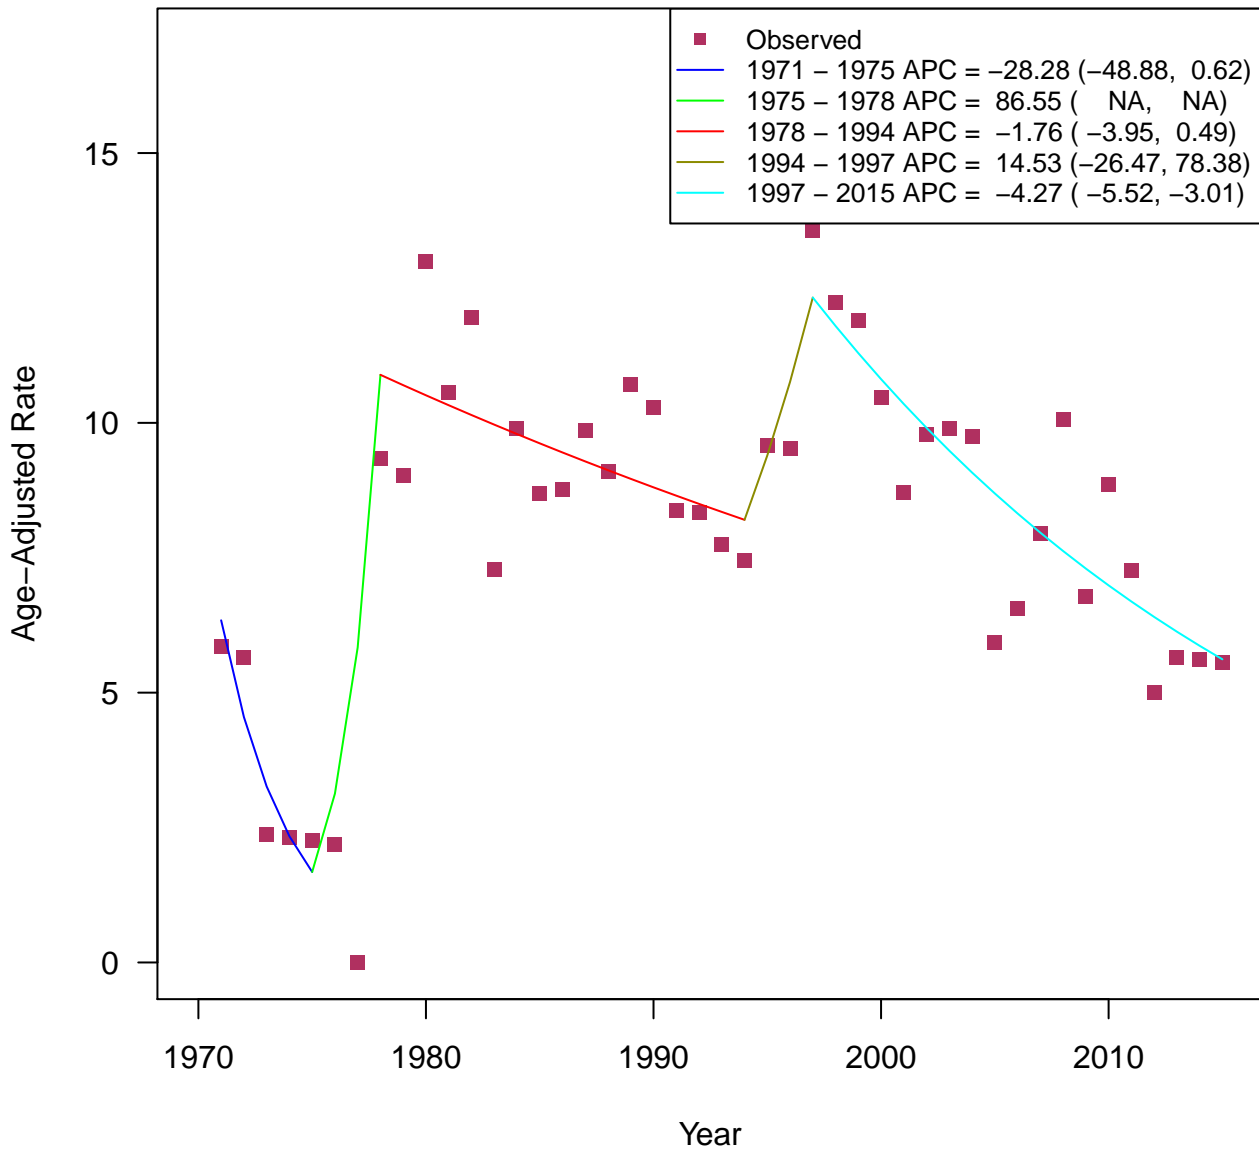

**Figure 96. Age-adjusted incidence rates of colon cancer in males aged 20–29 years in Canada, 1971–2015**

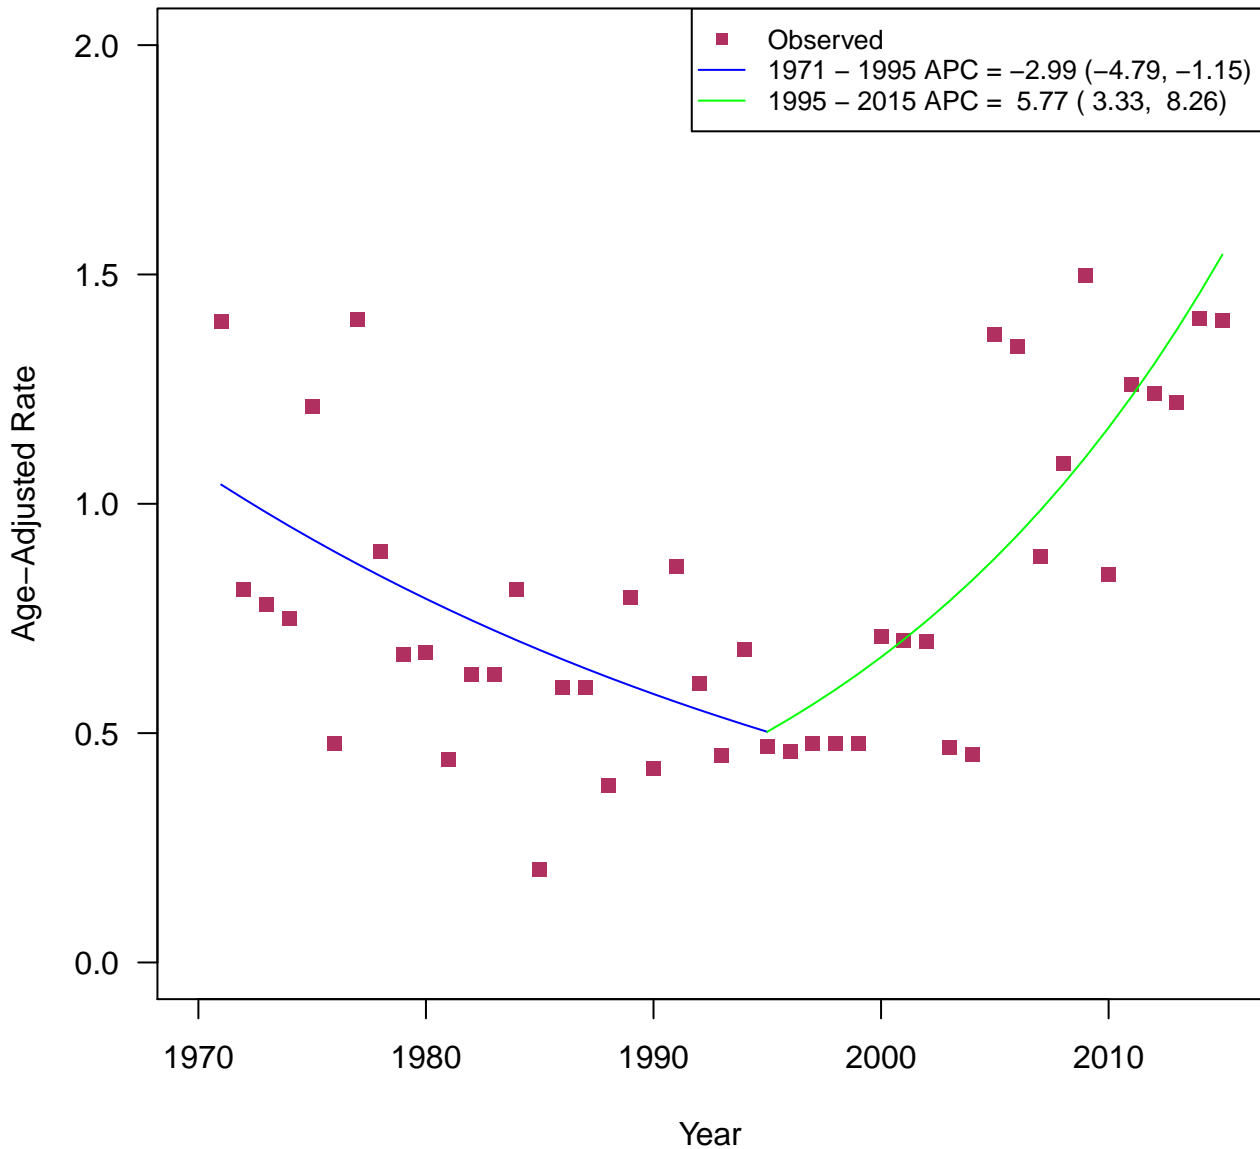

**Figure 97. Age-adjusted incidence rates of colon cancer in males aged 20–39 years in Canada, 1971–2015**

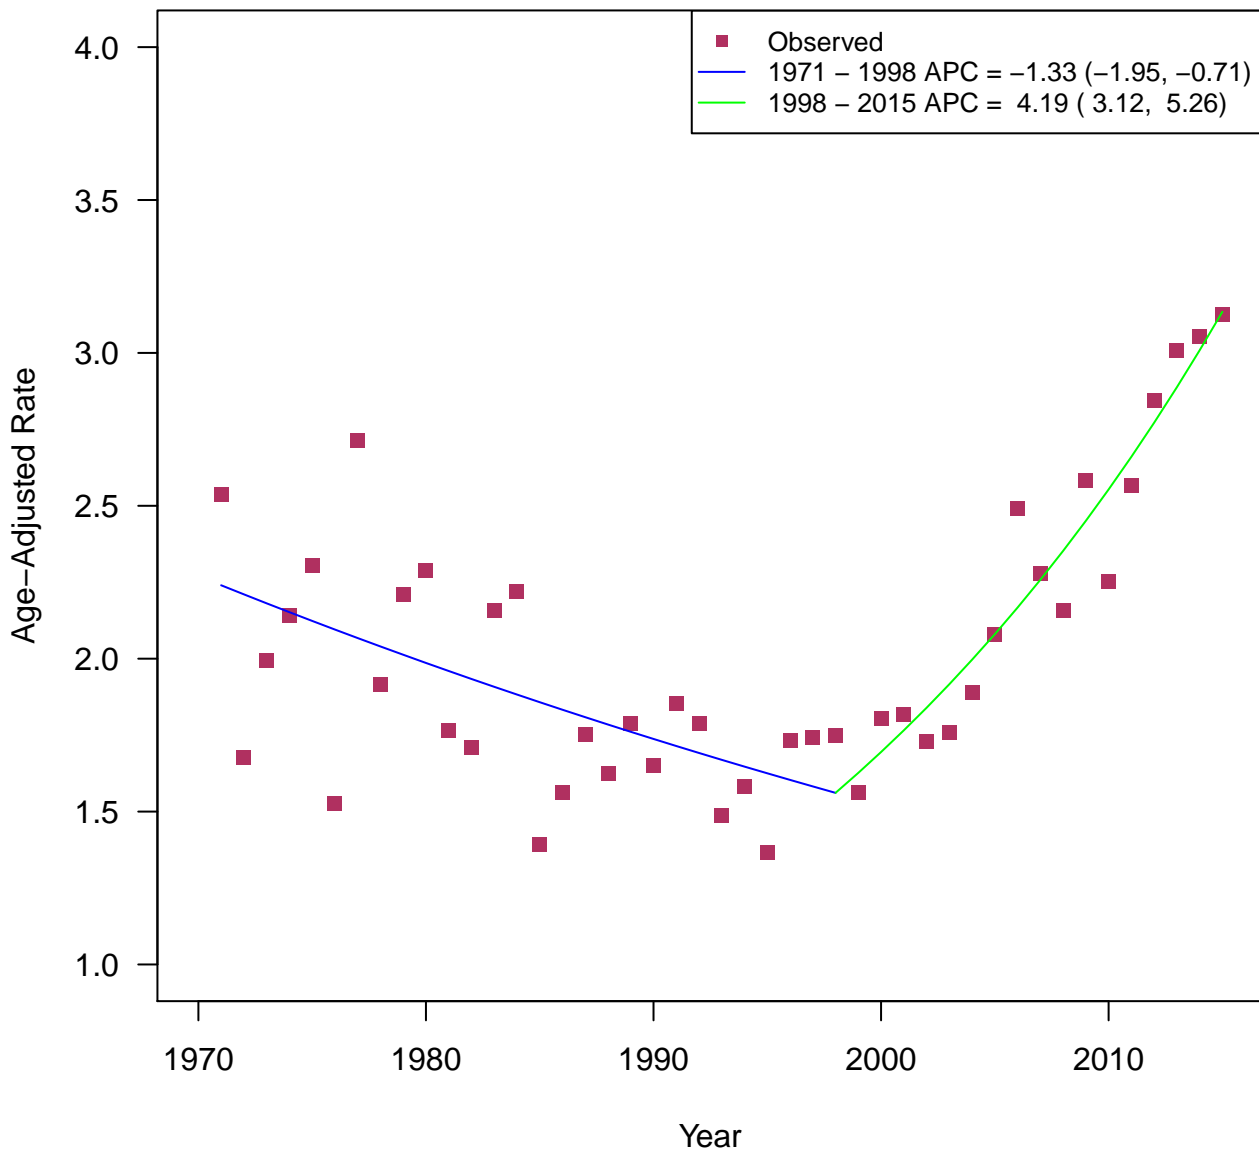

**Figure 98. Age-adjusted incidence rates of colon cancer in males aged 20–49 years in Canada, 1971–2015**

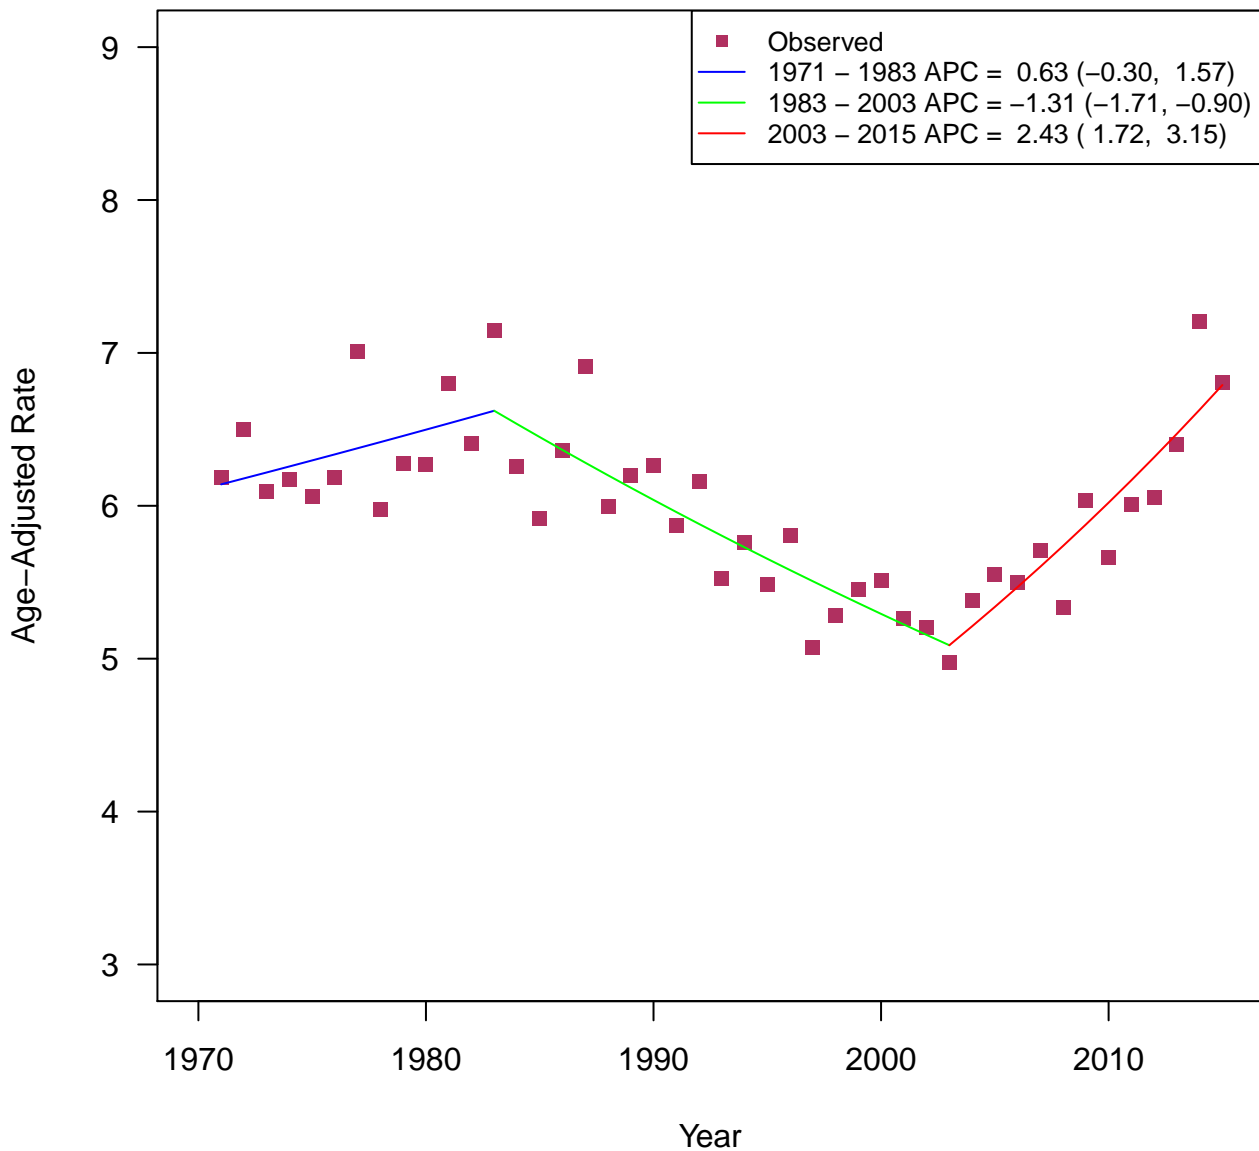

**Figure 99. Age-adjusted incidence rates of colon cancer in males aged 30–39 years in Canada, 1971–2015**

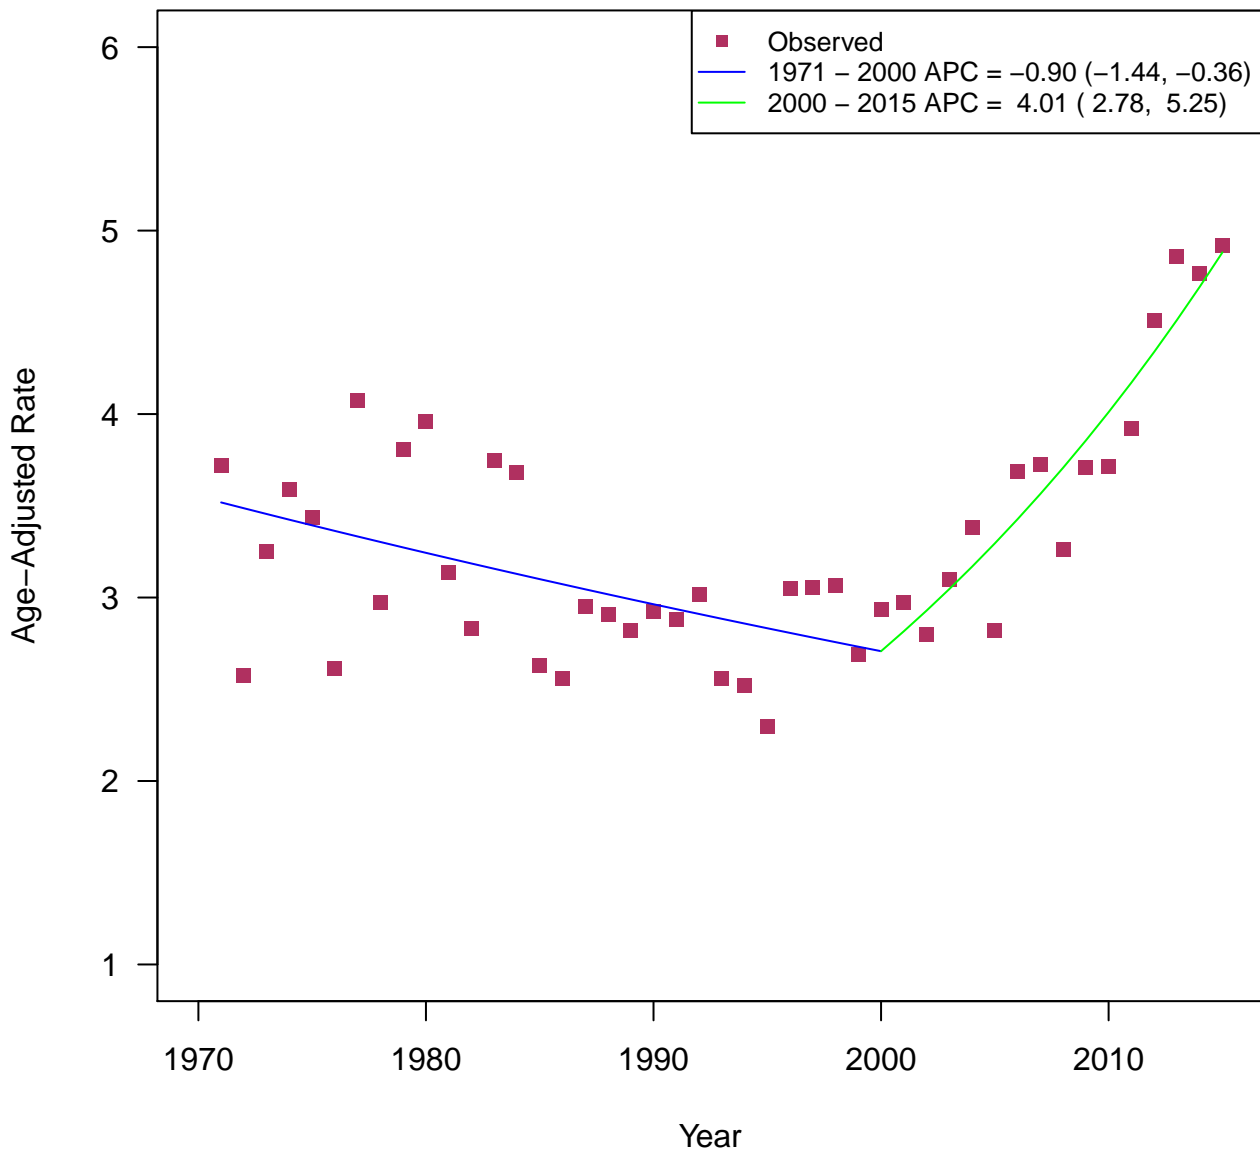



**Figure 100. Age-adjusted incidence rates of colon cancer in males aged 40–49 years in Canada, 1971–2015**

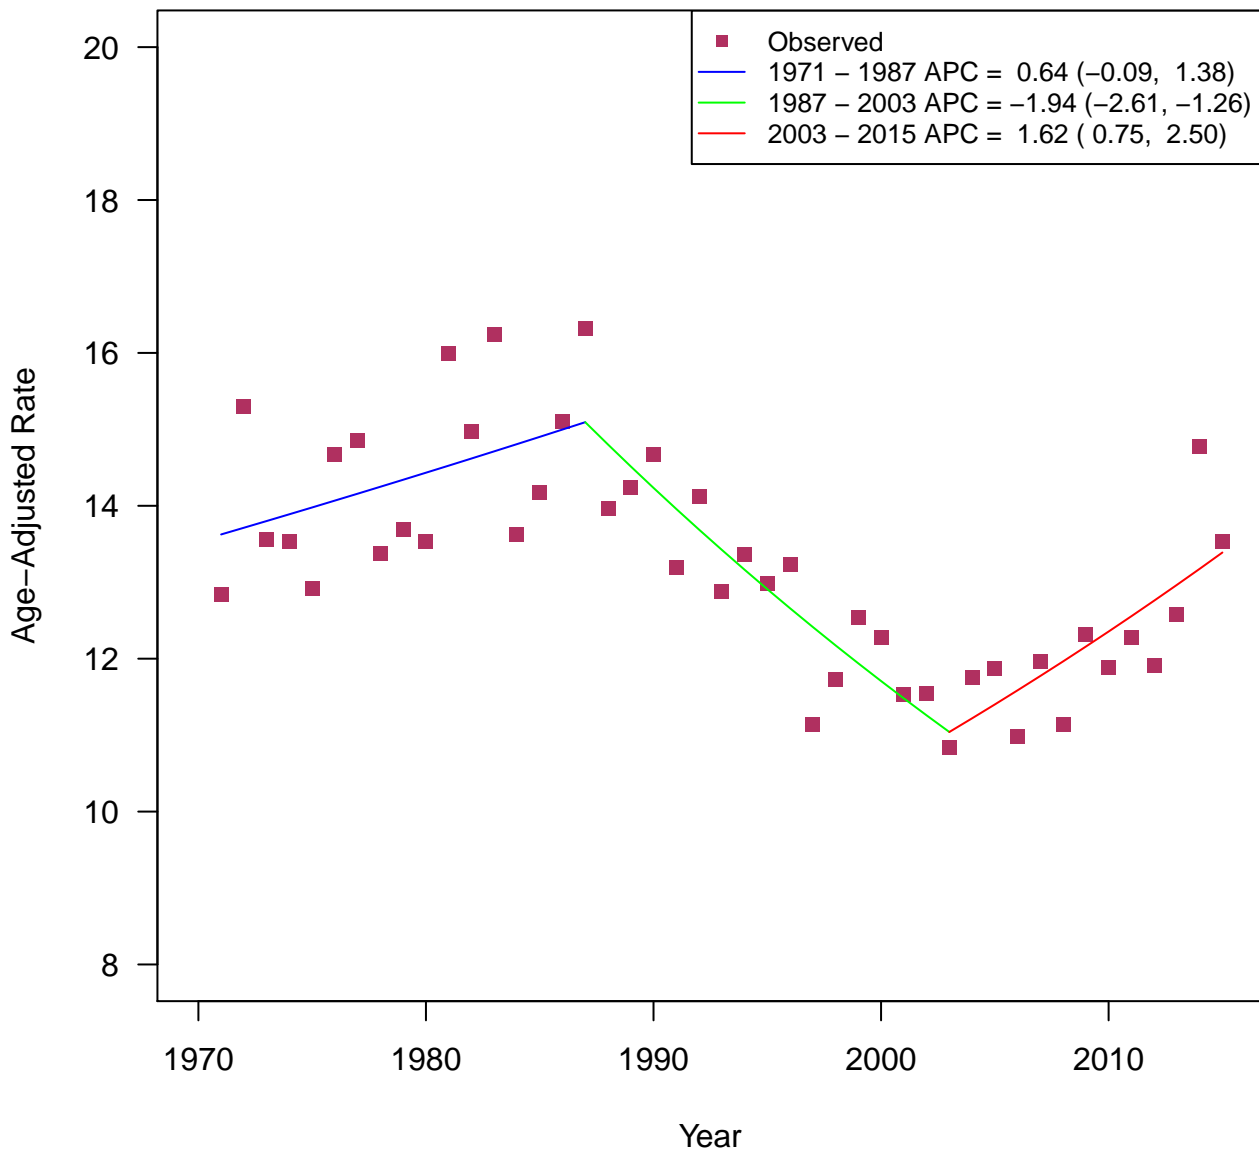

**Figure 101. Age-adjusted incidence rates of colon cancer in males aged 50–59 years in Canada, 1971–2015**

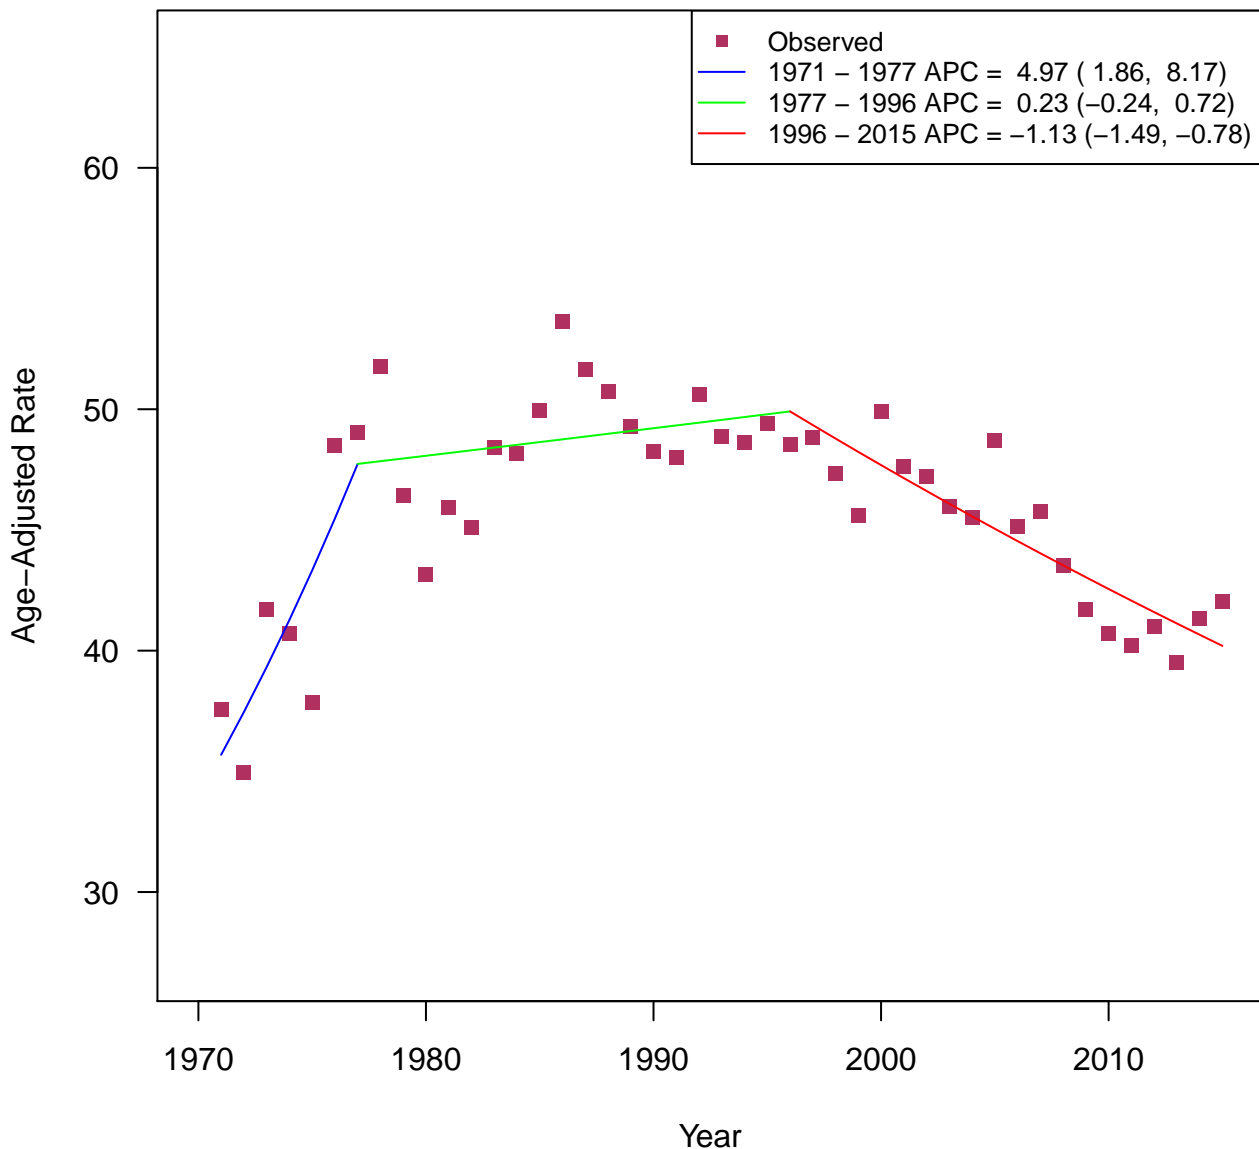

**Figure 102. Age-adjusted incidence rates of colon cancer in males aged 60–69 years in Canada, 1971–2015**

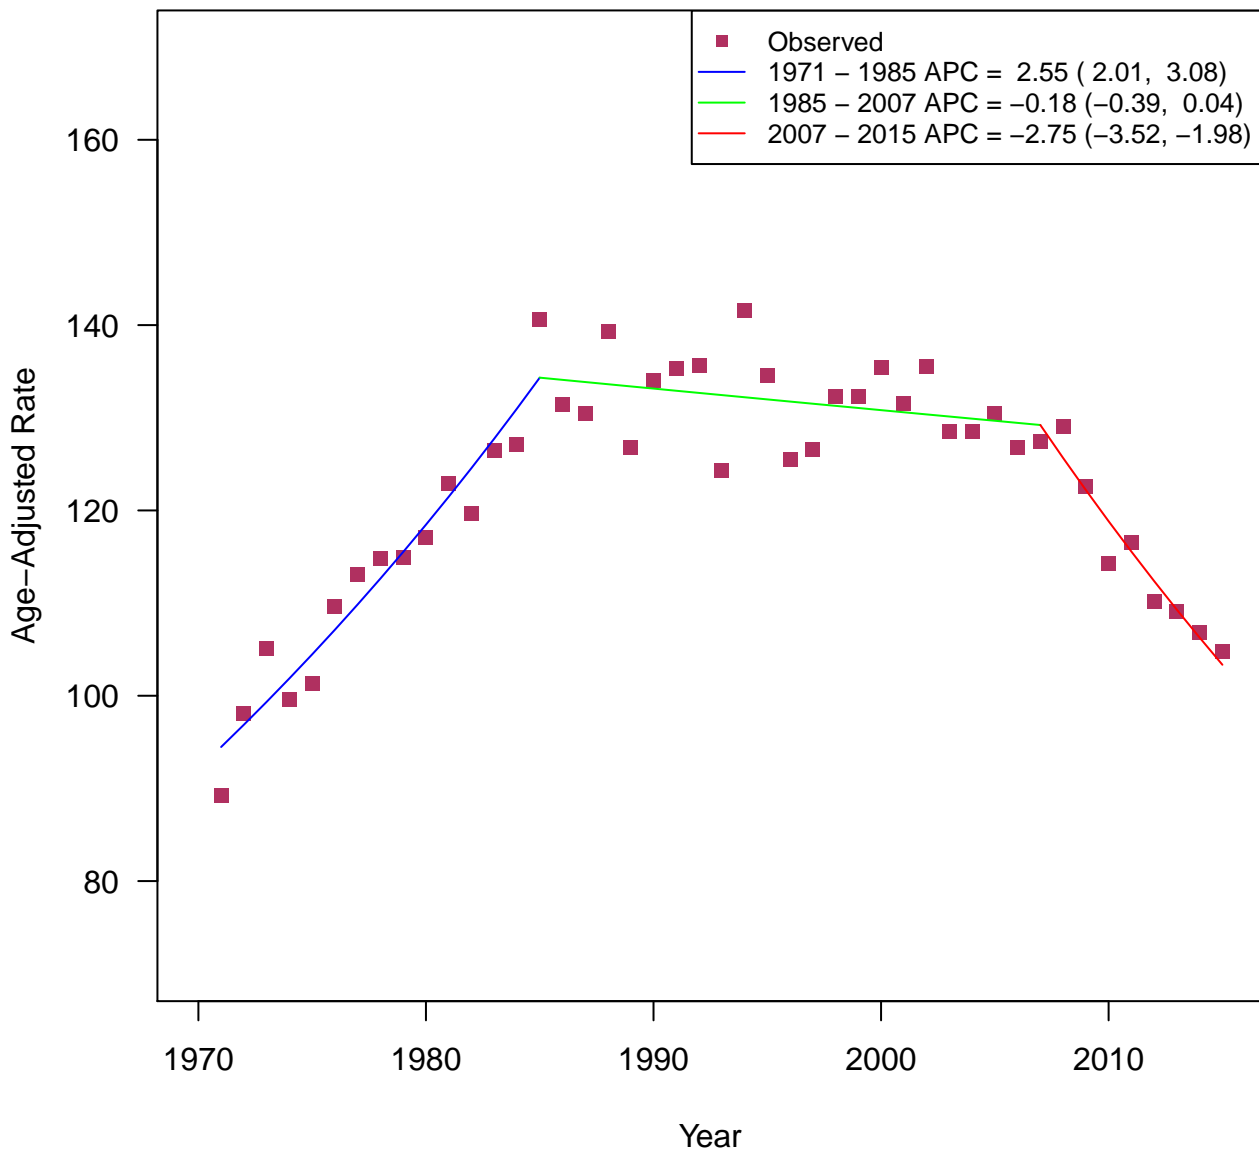

**Figure 103. Age-adjusted incidence rates of colon cancer in males aged 70–79 years in Canada, 1971–2015**

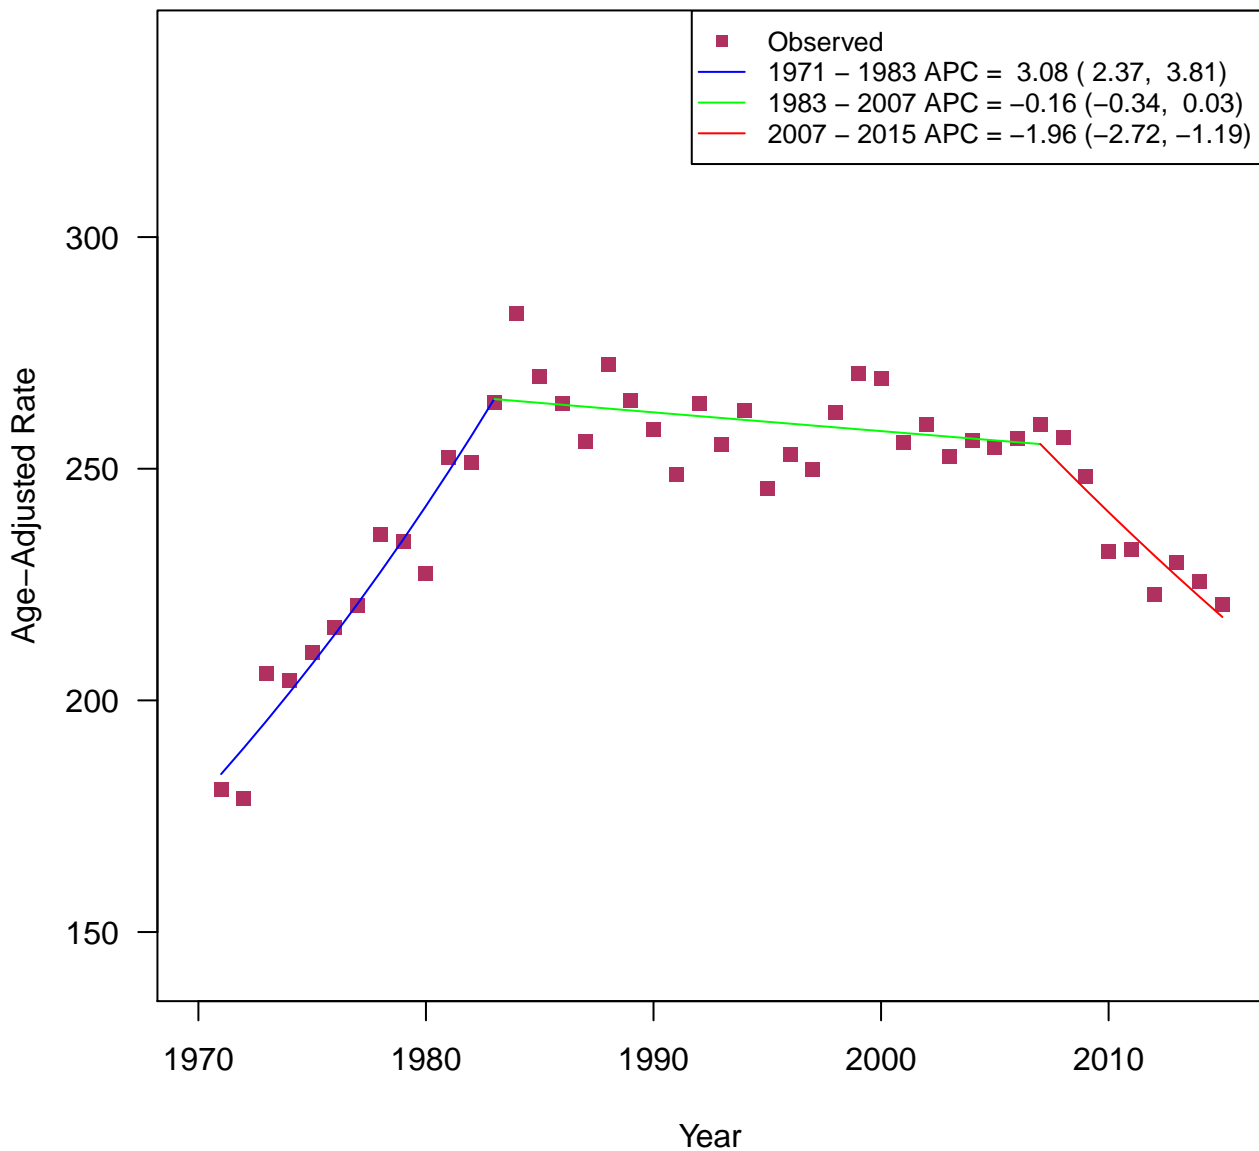

**Figure 104. Age-adjusted incidence rates of colon cancer in males aged 80–89 years in Canada, 1971–2015**

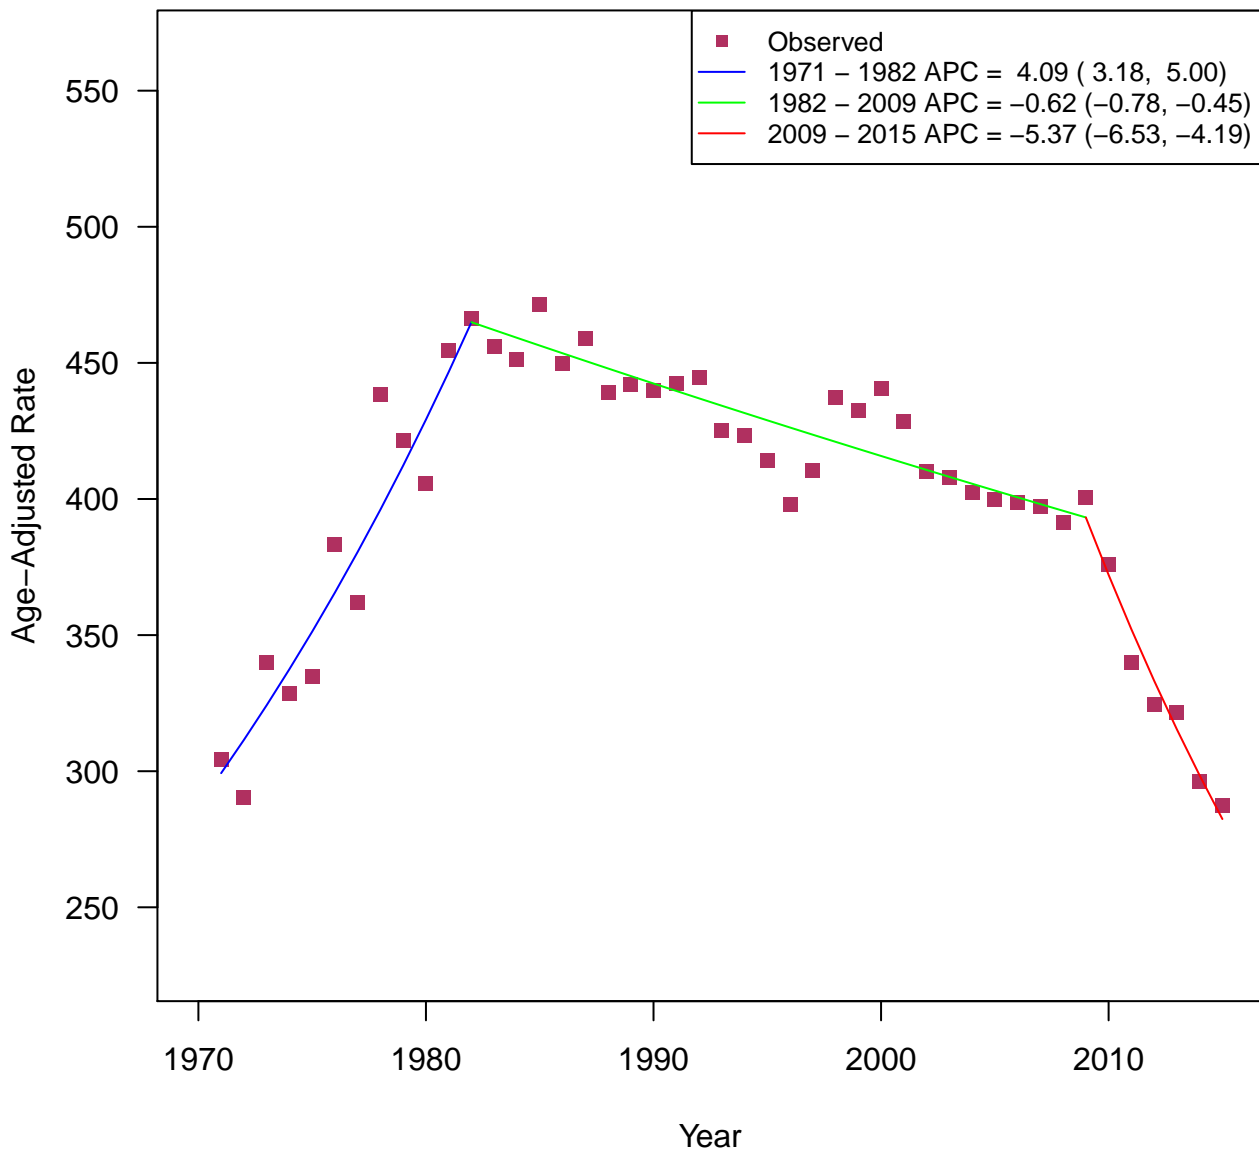

**Figure 105. Age-adjusted incidence rates of colon cancer in females aged 20–29 years in Canada, 1971–2015**

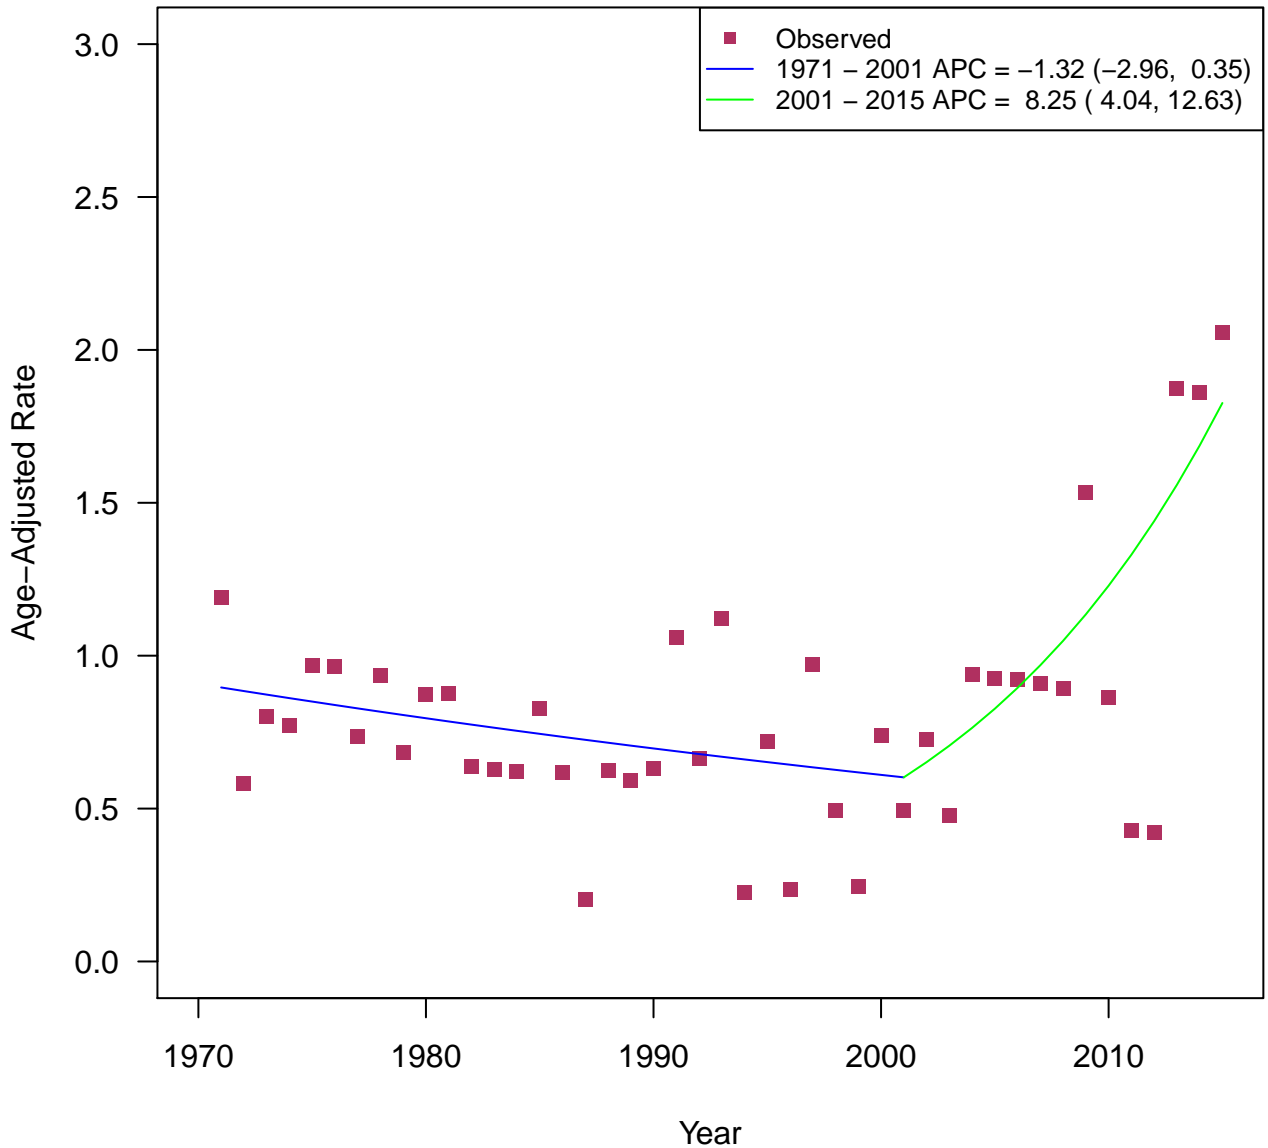

**Figure 106. Age-adjusted incidence rates of colon cancer in females aged 20–39 years in Canada, 1971–2015**

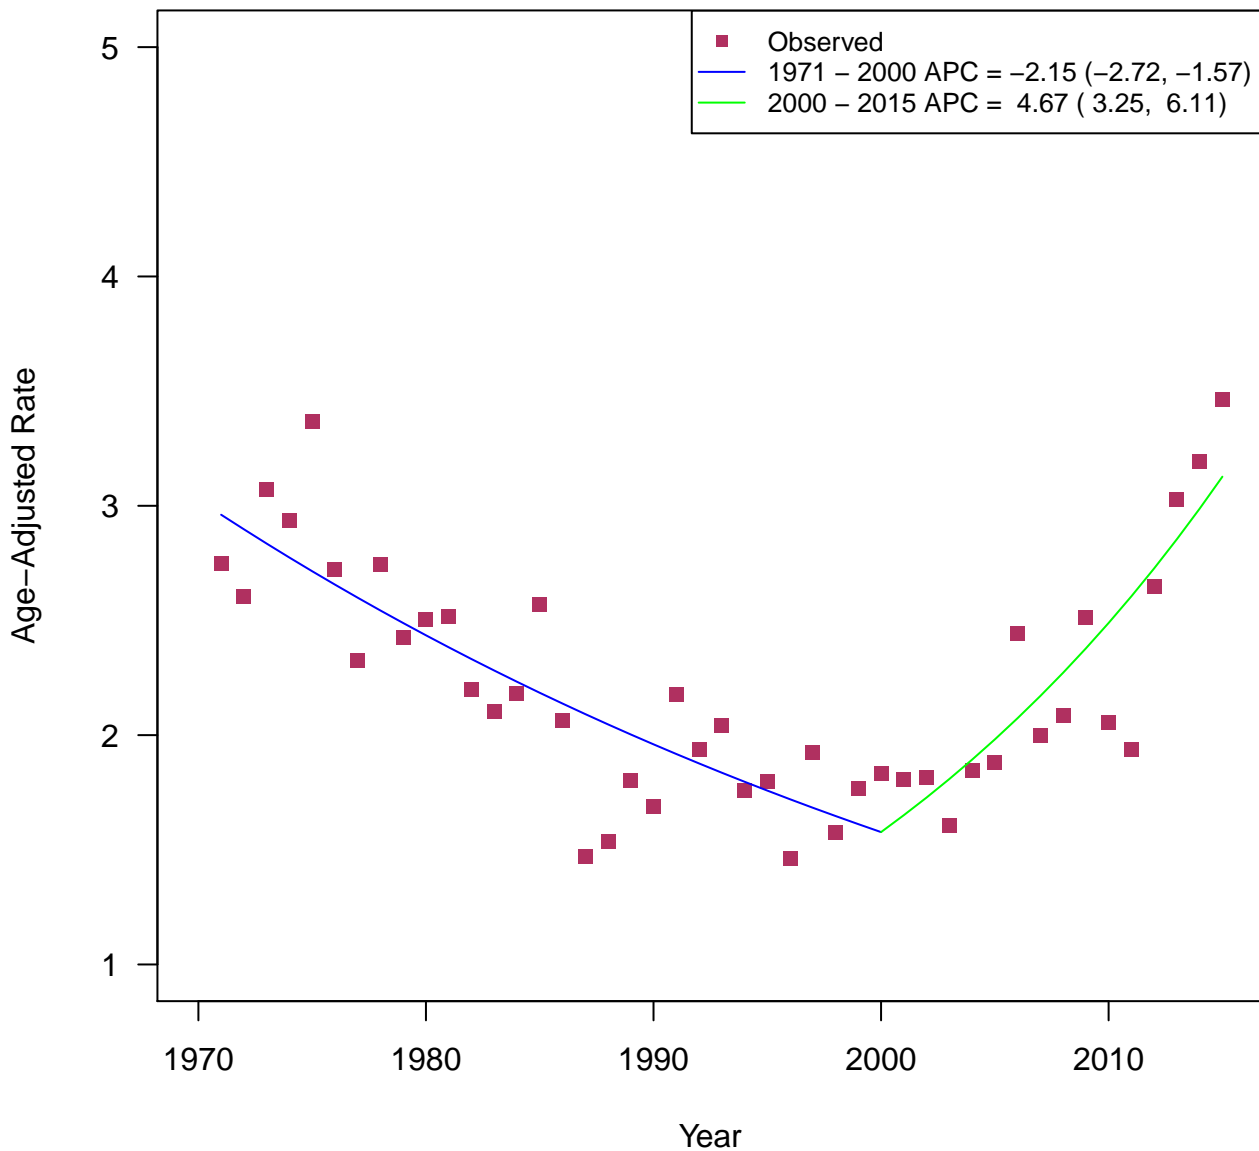

**Figure 107. Age-adjusted incidence rates of colon cancer in females aged 30–39 years in Canada, 1971–2015**

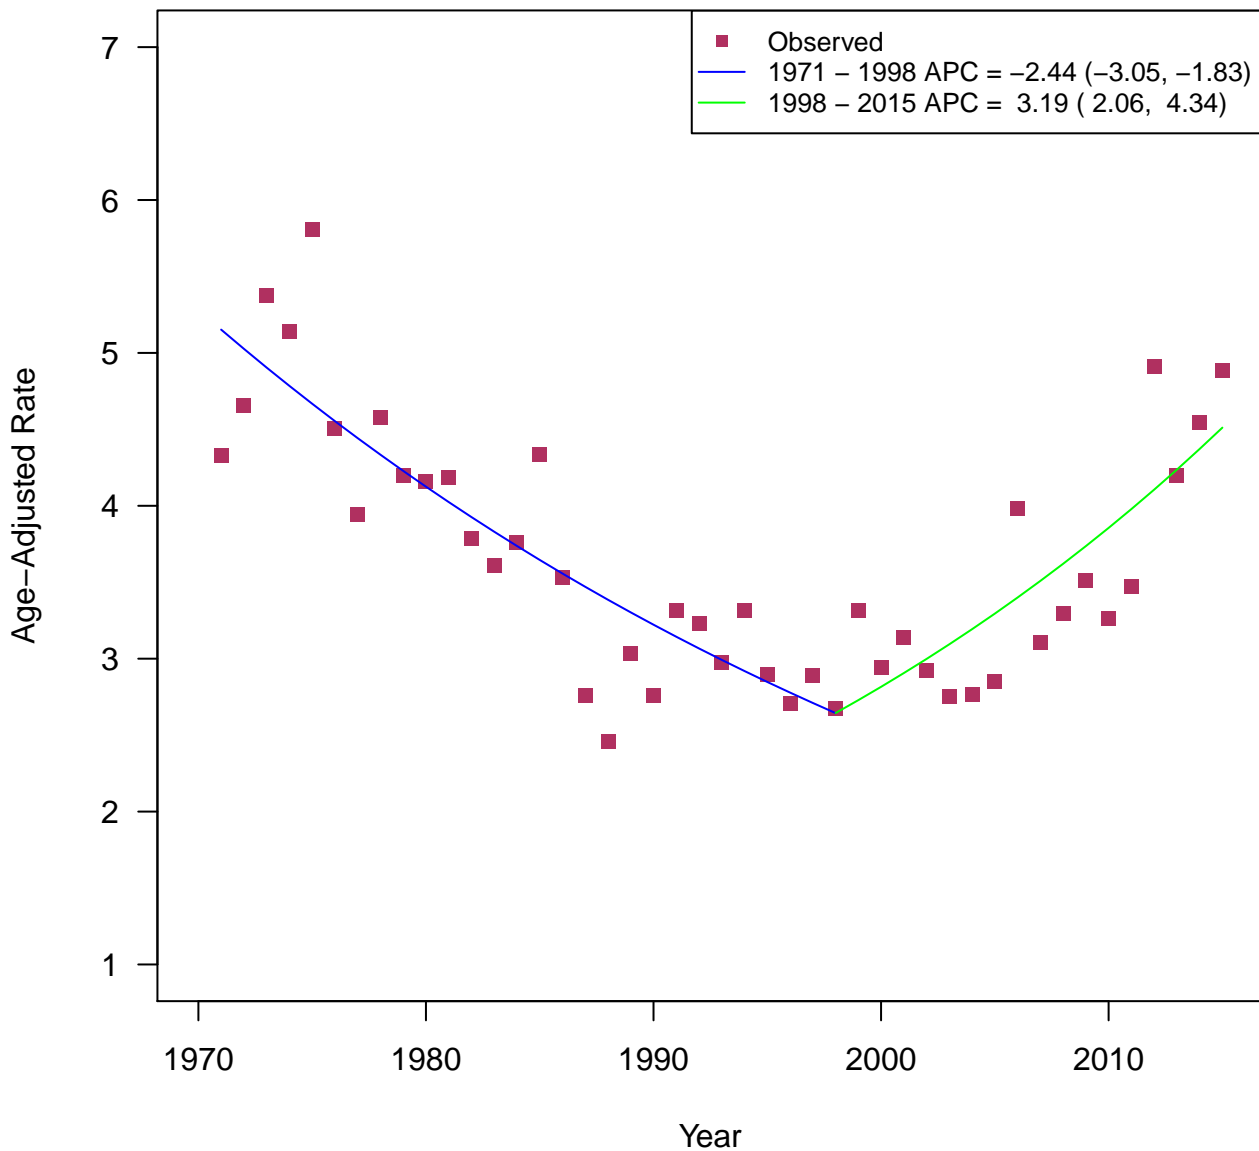



**Figure 108. Age-adjusted incidence rates of colon cancer in females aged 40–49 years in Canada, 1971–2015**

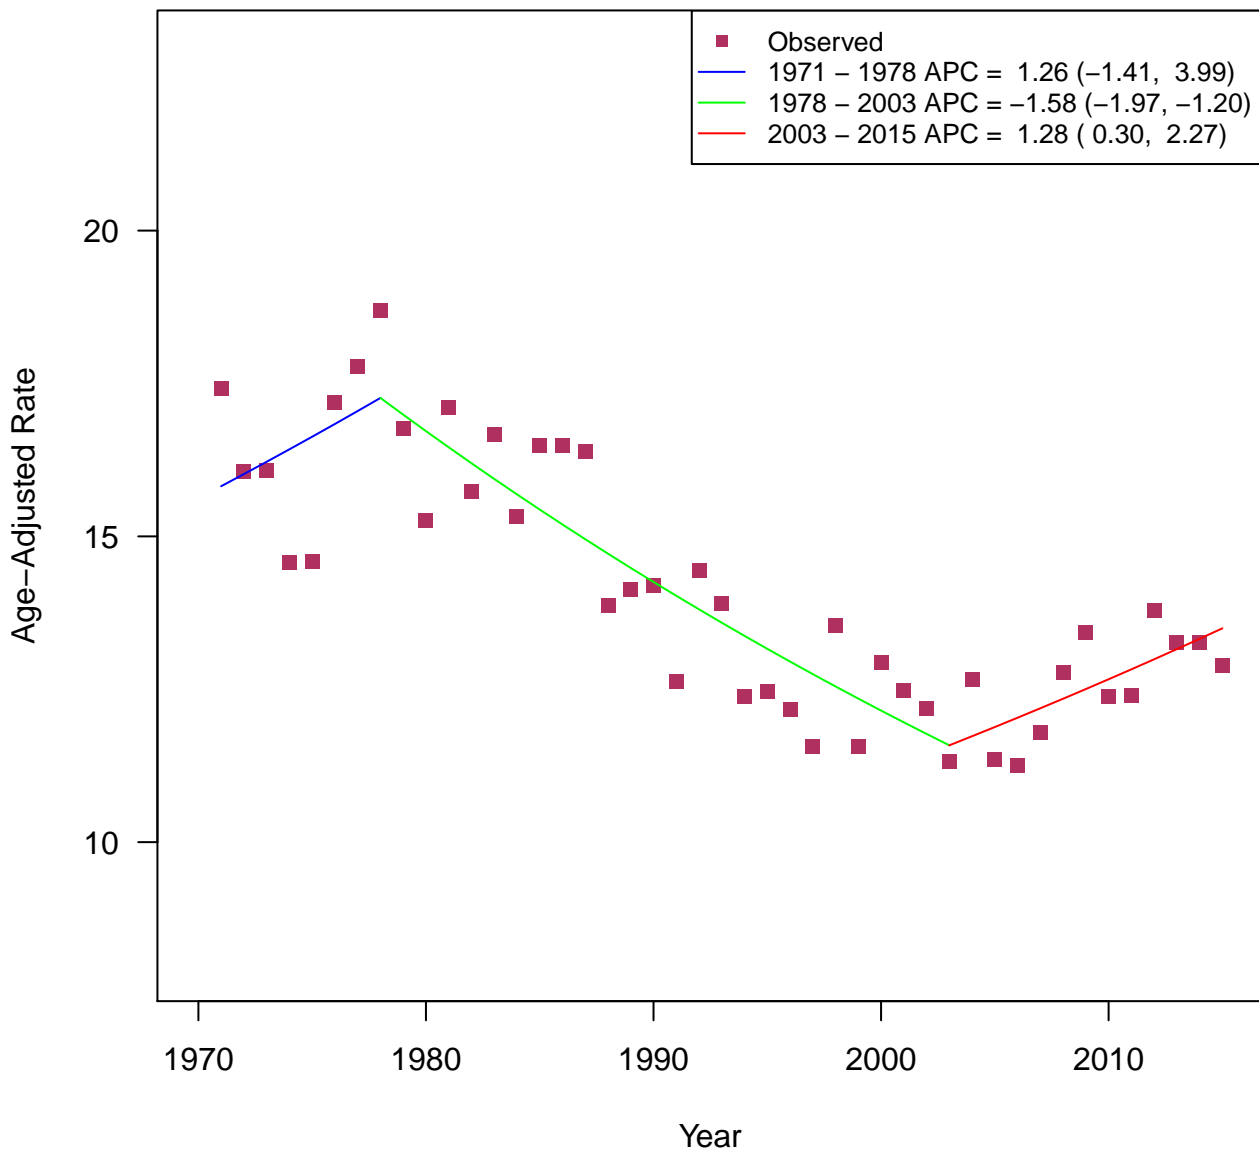

**Figure 109. Age-adjusted incidence rates of colon cancer in females aged 50–59 years in Canada, 1971–2015**

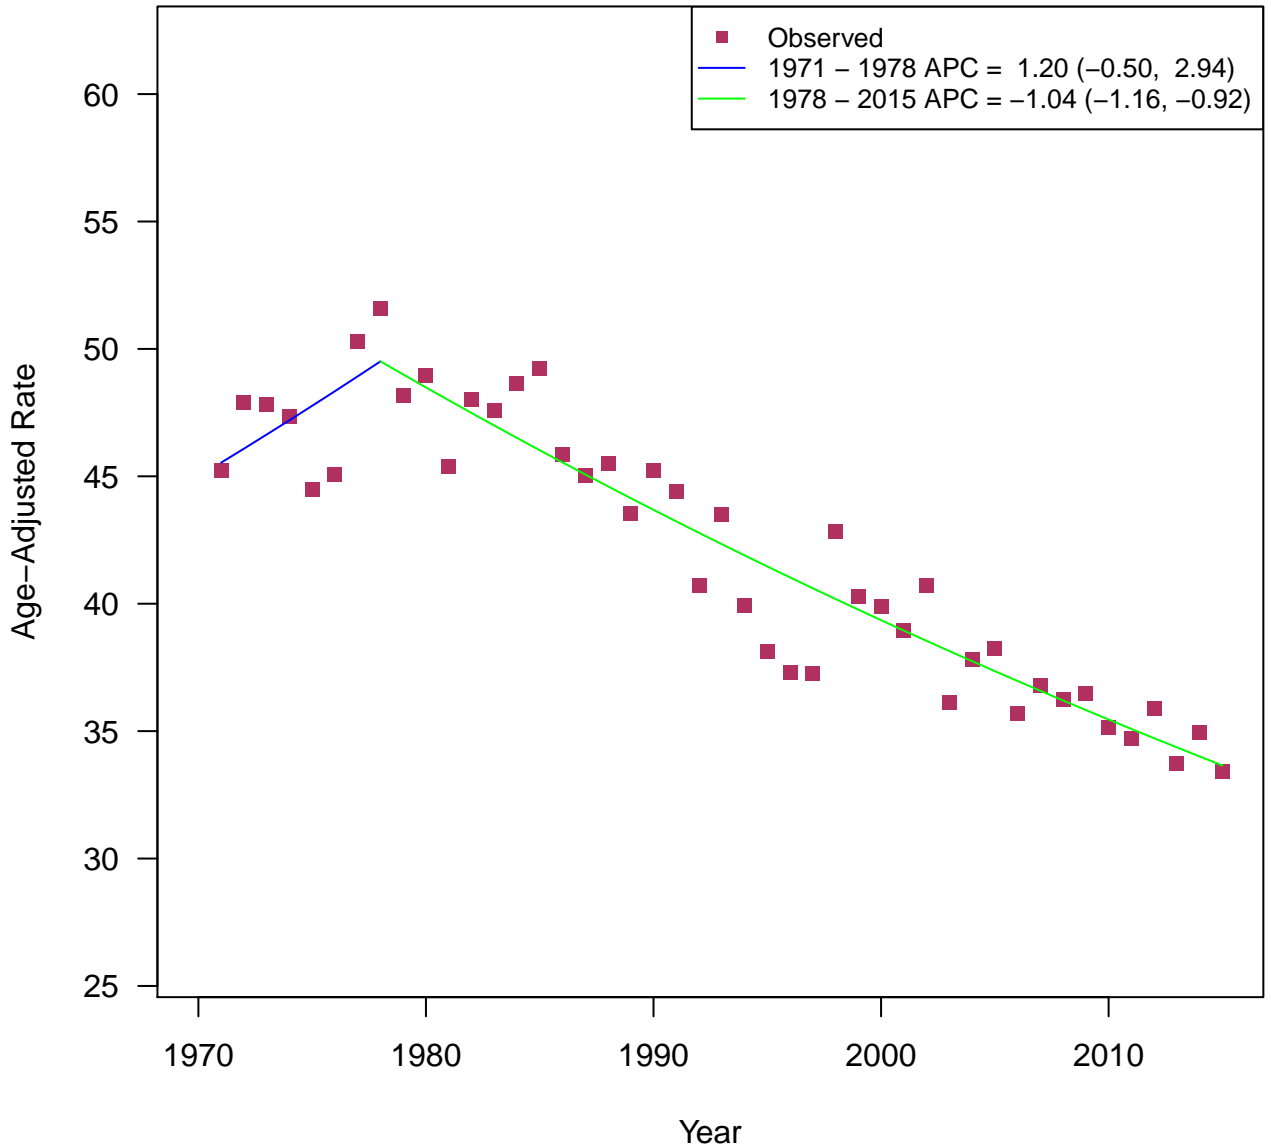

**Figure 110. Age-adjusted incidence rates of colon cancer in females aged 60–69 years in Canada, 1971–2015**

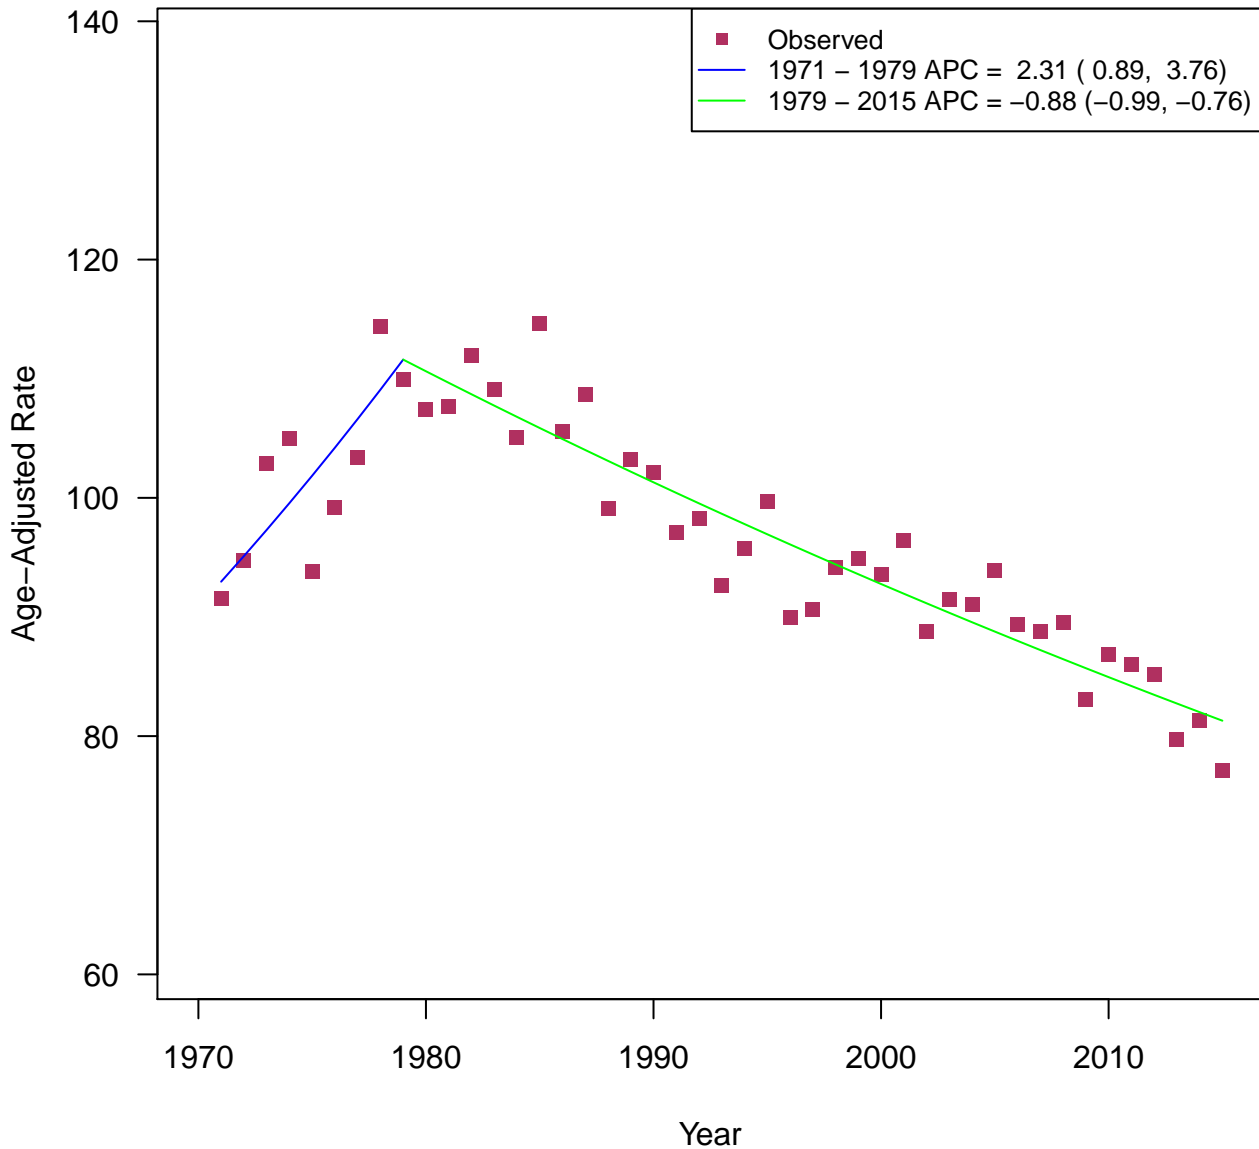

**Figure 111. Age-adjusted incidence rates of colon cancer in females aged 70–79 years in Canada, 1971–2015**

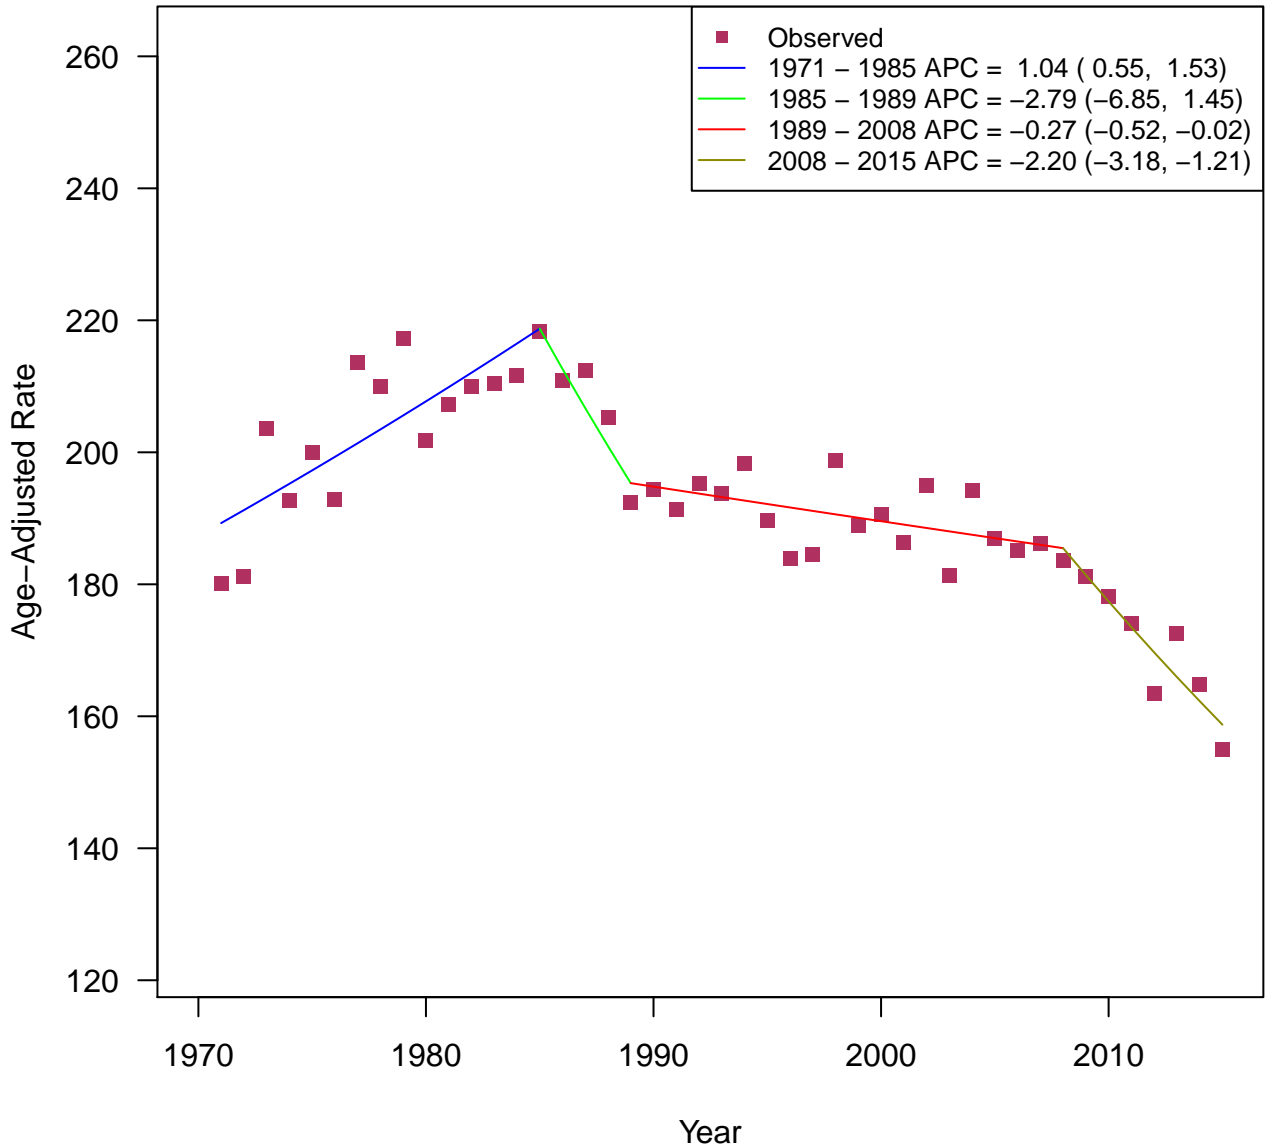

**Figure 112. Age-adjusted incidence rates of colon cancer in females aged 80–89 years in Canada, 1971–2015**

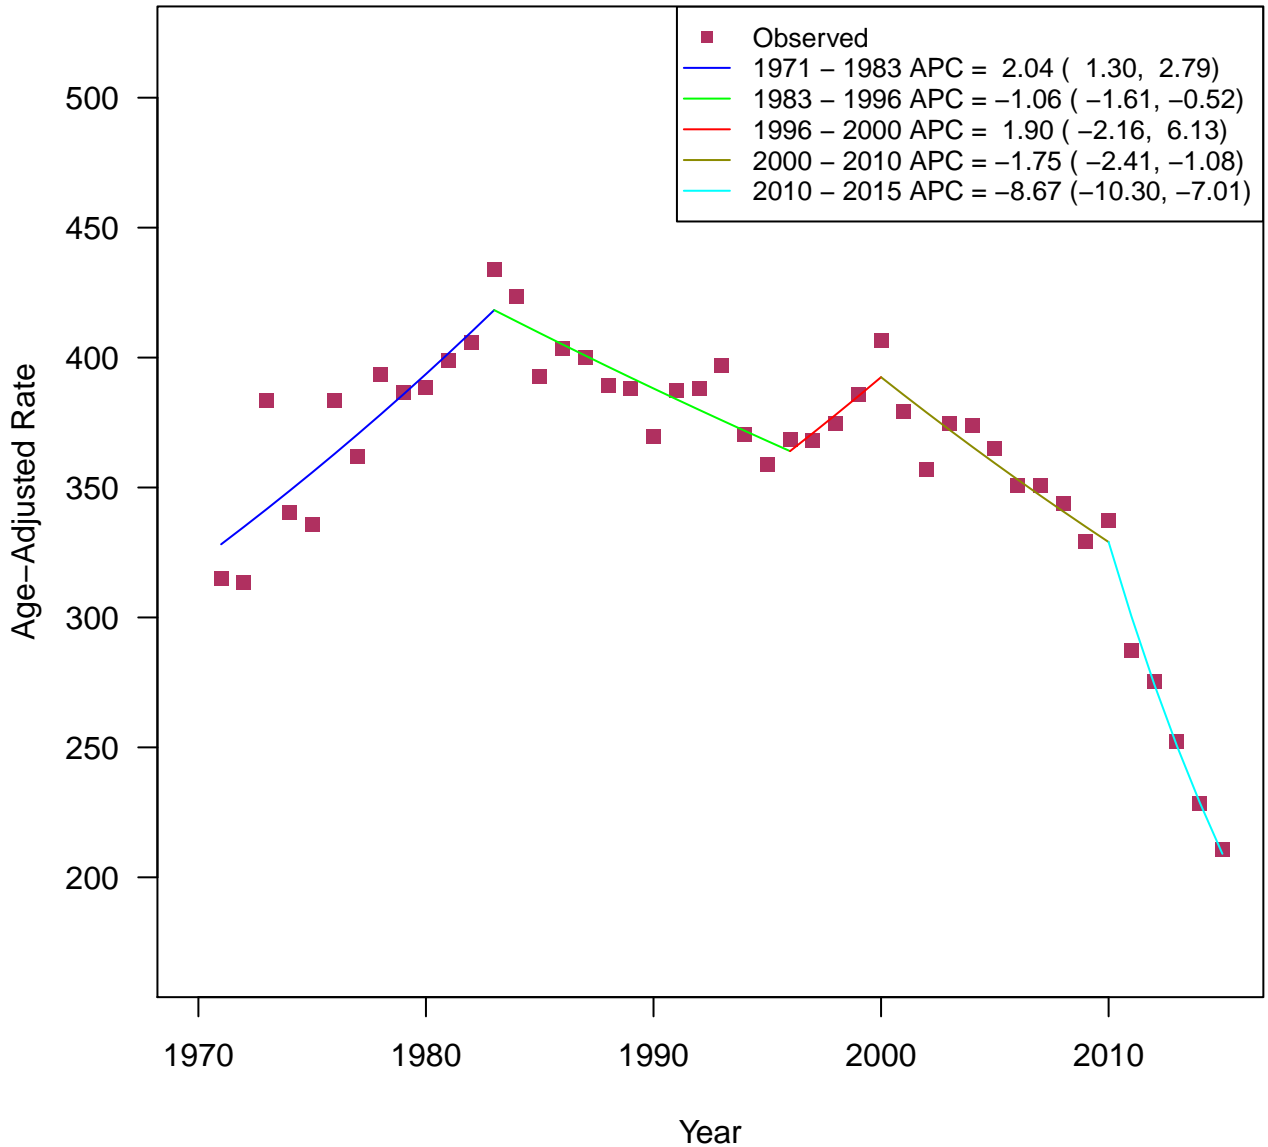

**Figure 113. Age-adjusted incidence rates of colorectal cancer in males aged 20–29 years in Canada, 1971–2015**

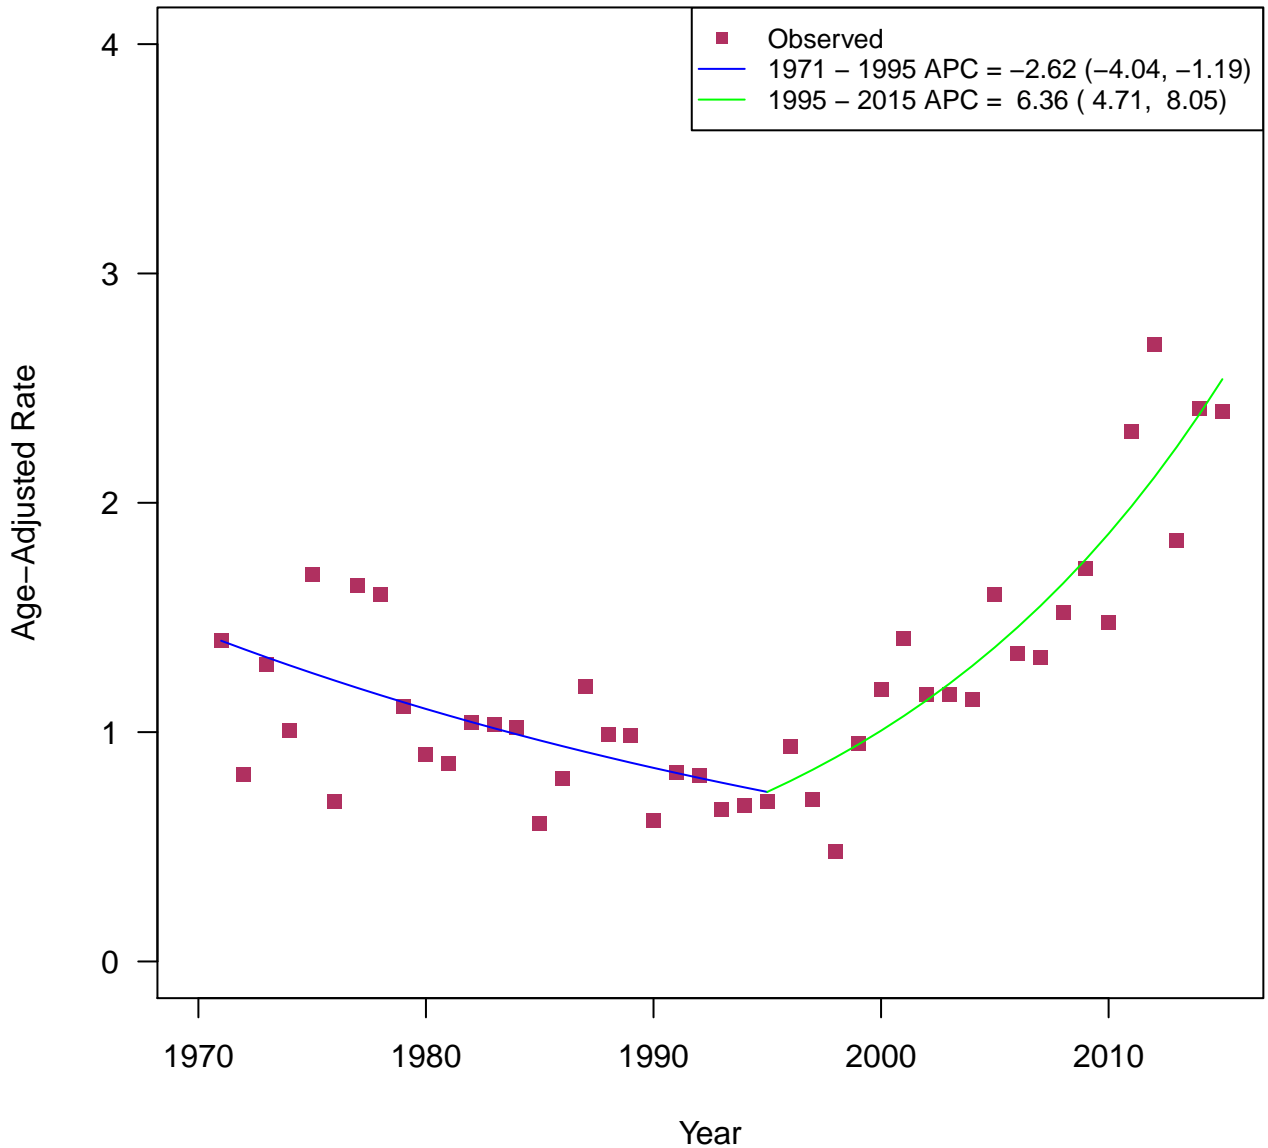

**Figure 114. Age-adjusted incidence rates of colorectal cancer in males aged 20–39 years in Canada, 1971–2015**

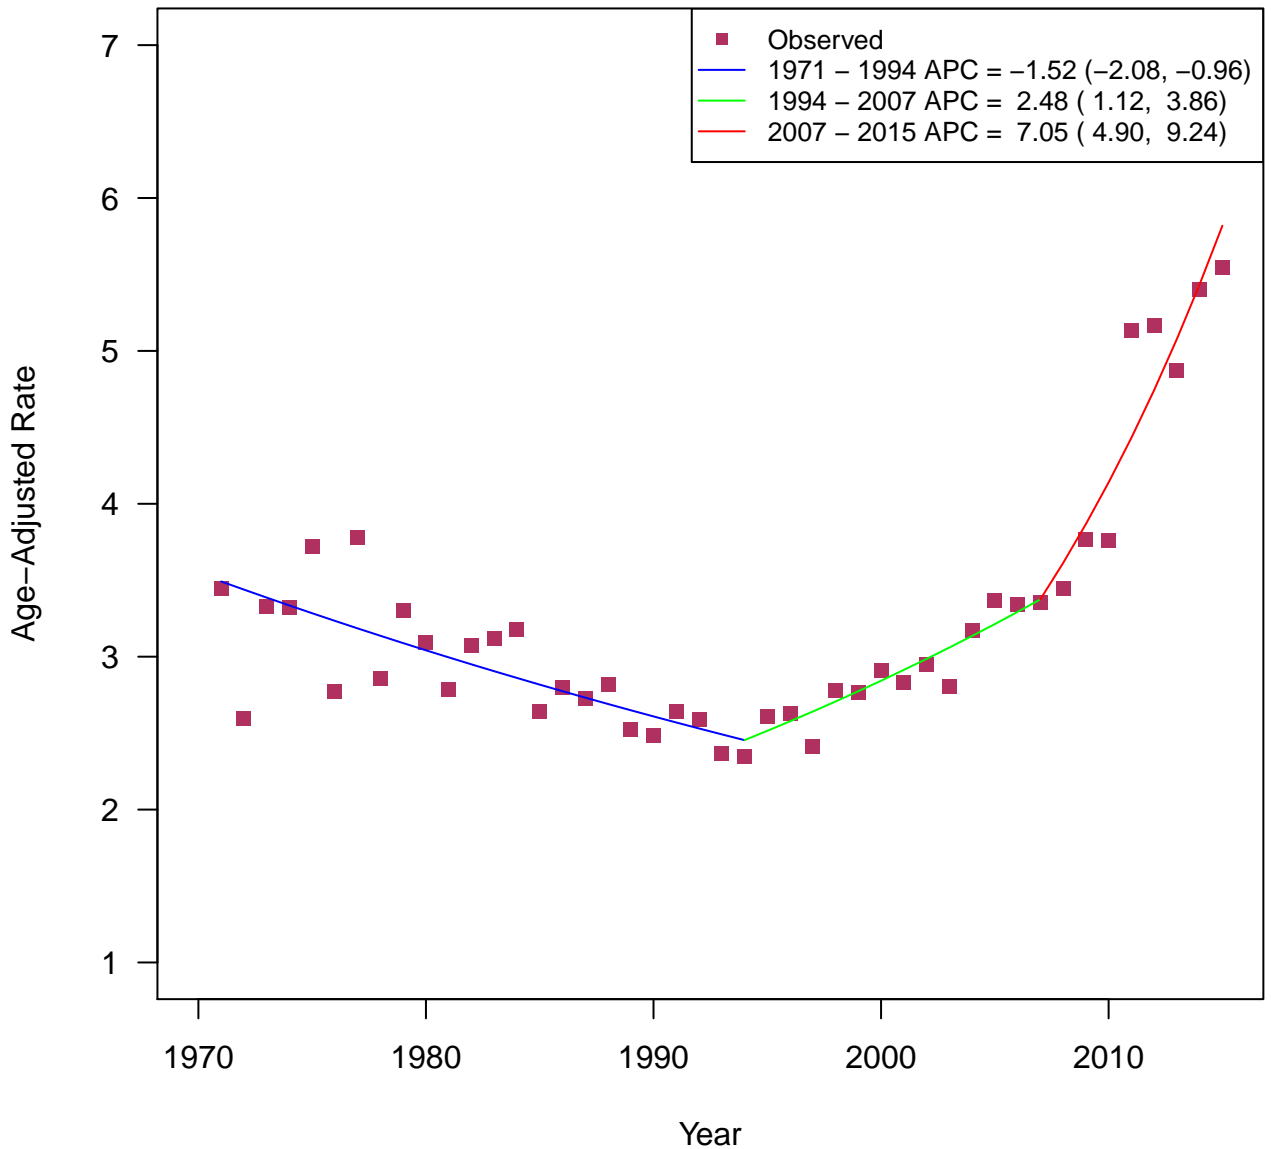

**Figure 115. Age-adjusted incidence rates of colorectal cancer in males aged 20–49 years in Canada, 1971–2015**

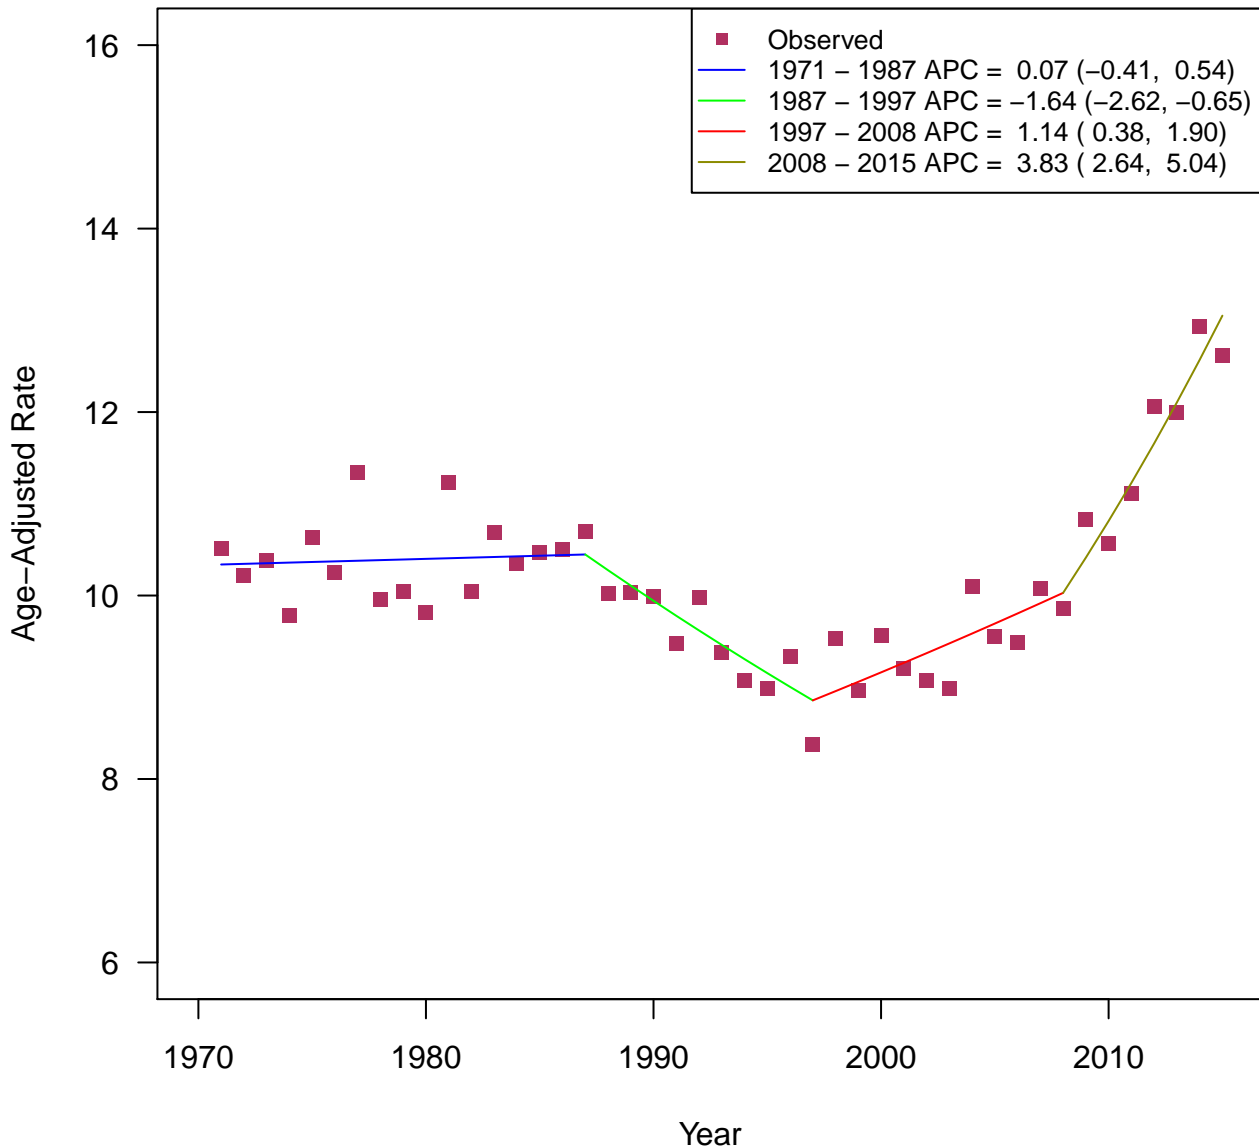



**Figure 116. Age-adjusted incidence rates of colorectal cancer in males aged 30–39 years in Canada, 1971–2015**

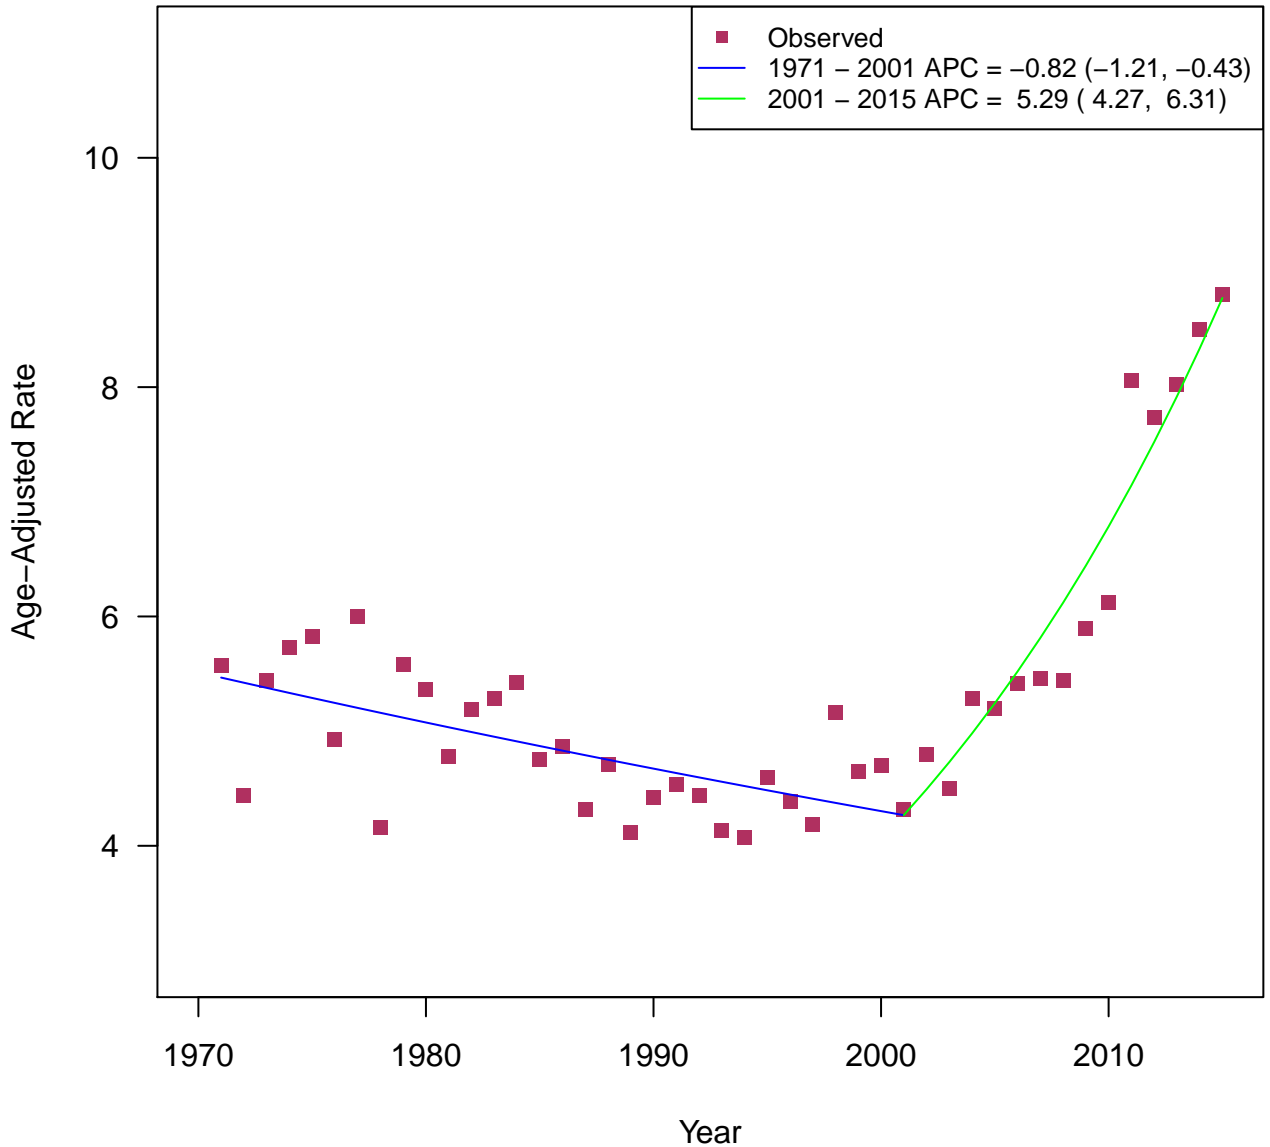

**Figure 117. Age-adjusted incidence rates of colorectal cancer in males aged 40–49 years in Canada, 1971–2015**

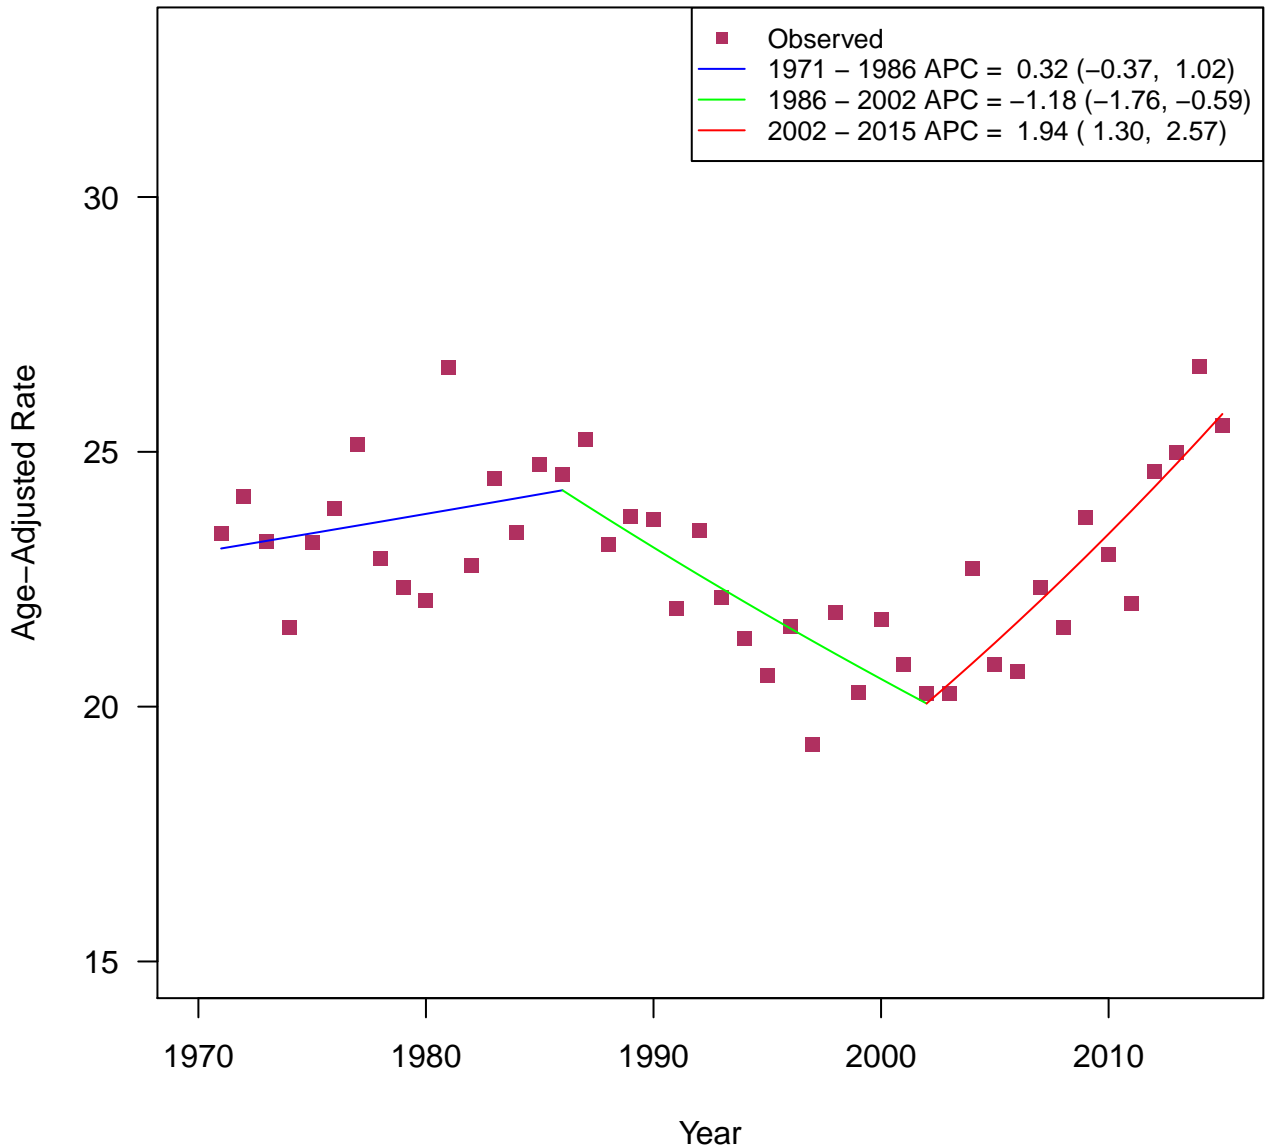

**Figure 118. Age-adjusted incidence rates of colorectal cancer in males aged 50–59 years in Canada, 1971–2015**

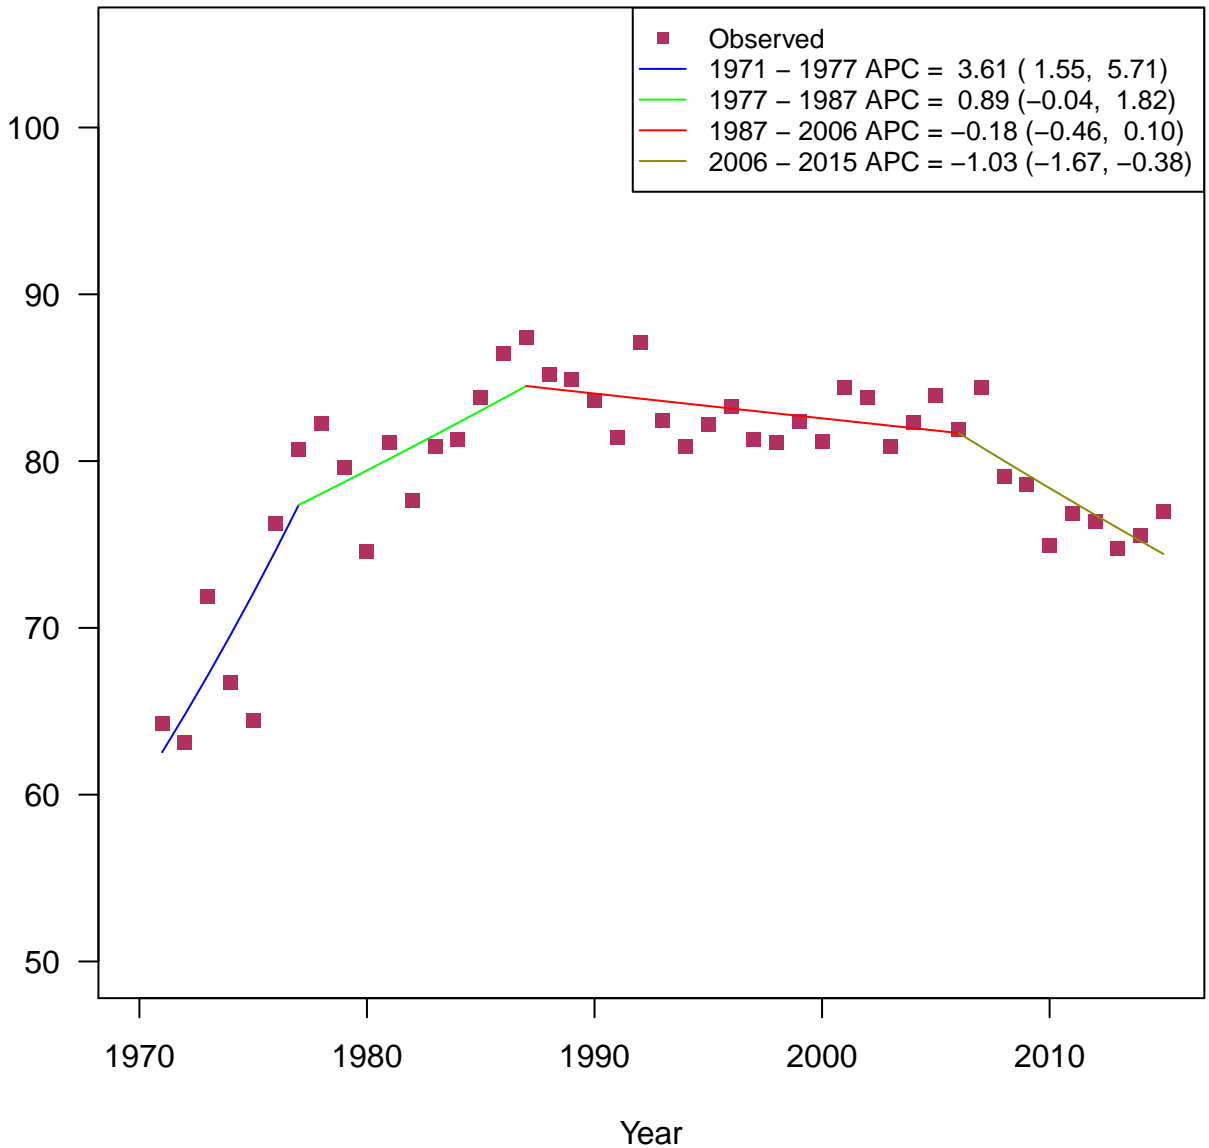

**Figure 119. Age-adjusted incidence rates of colorectal cancer in males aged 60–69 years in Canada, 1971–2015**

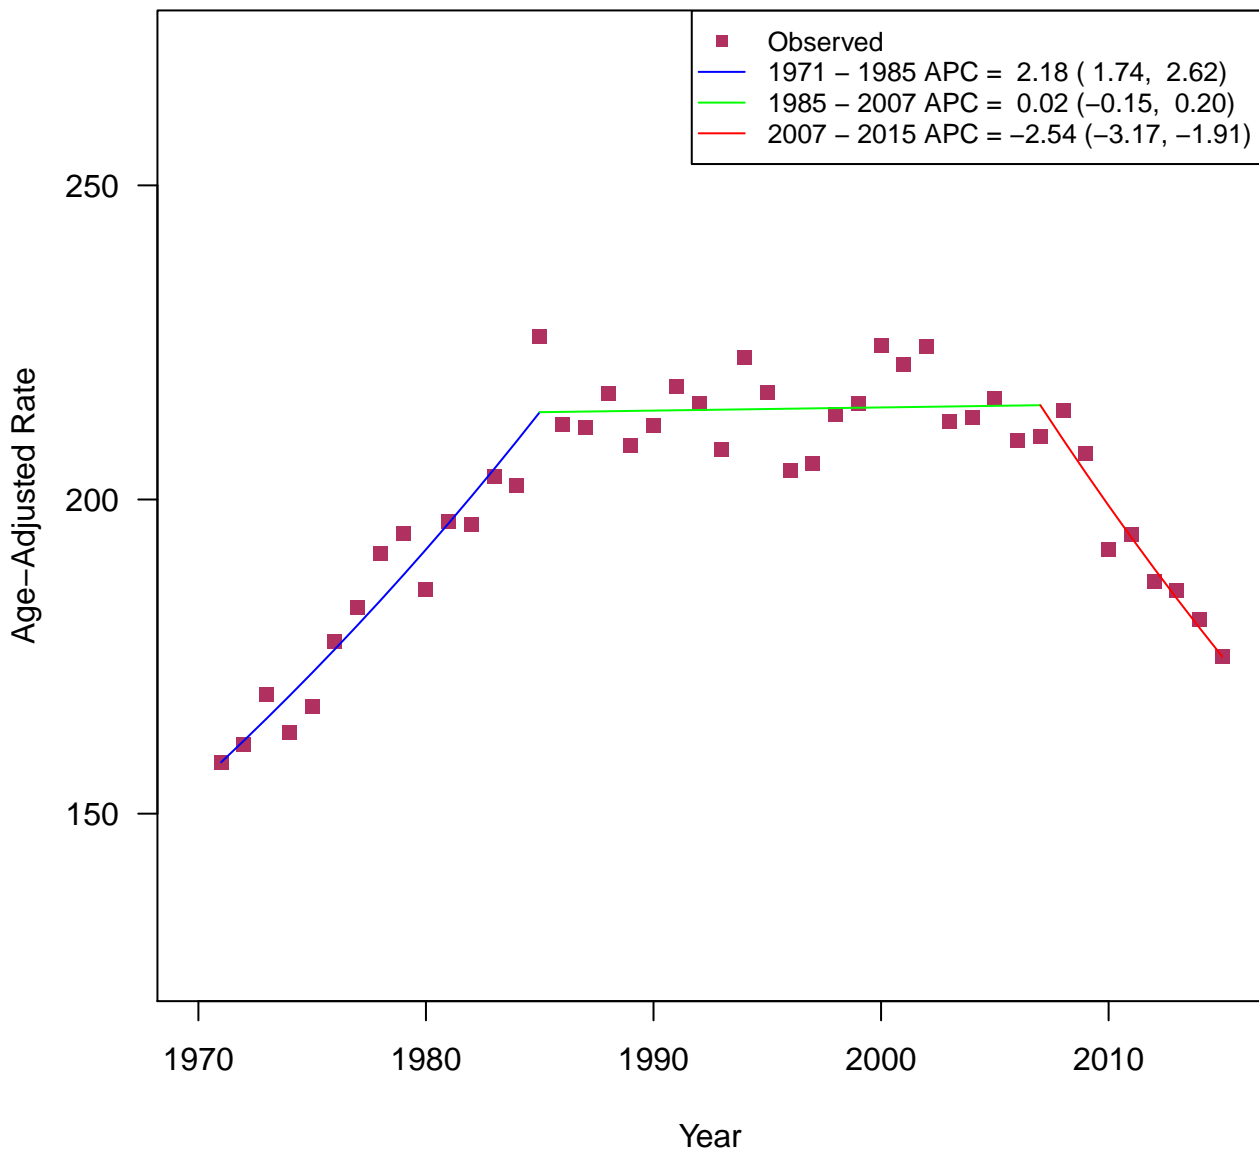

**Figure 120. Age-adjusted incidence rates of colorectal cancer in males aged 70–79 years in Canada, 1971–2015**

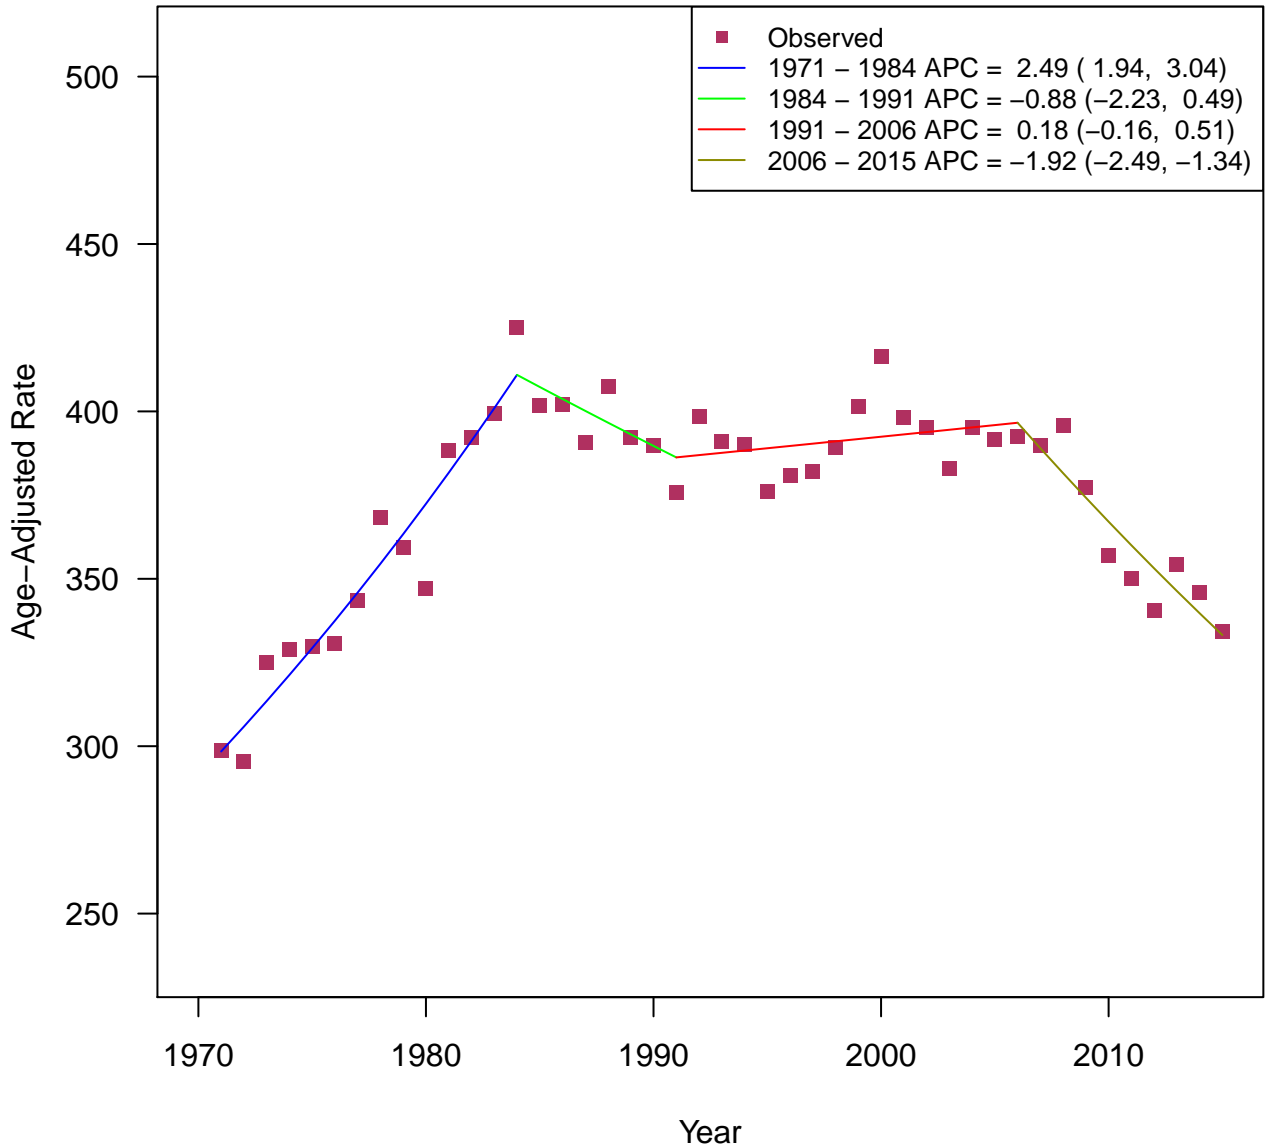

**Figure 121. Age-adjusted incidence rates of colorectal cancer in males aged 80–89 years in Canada, 1971–2015**

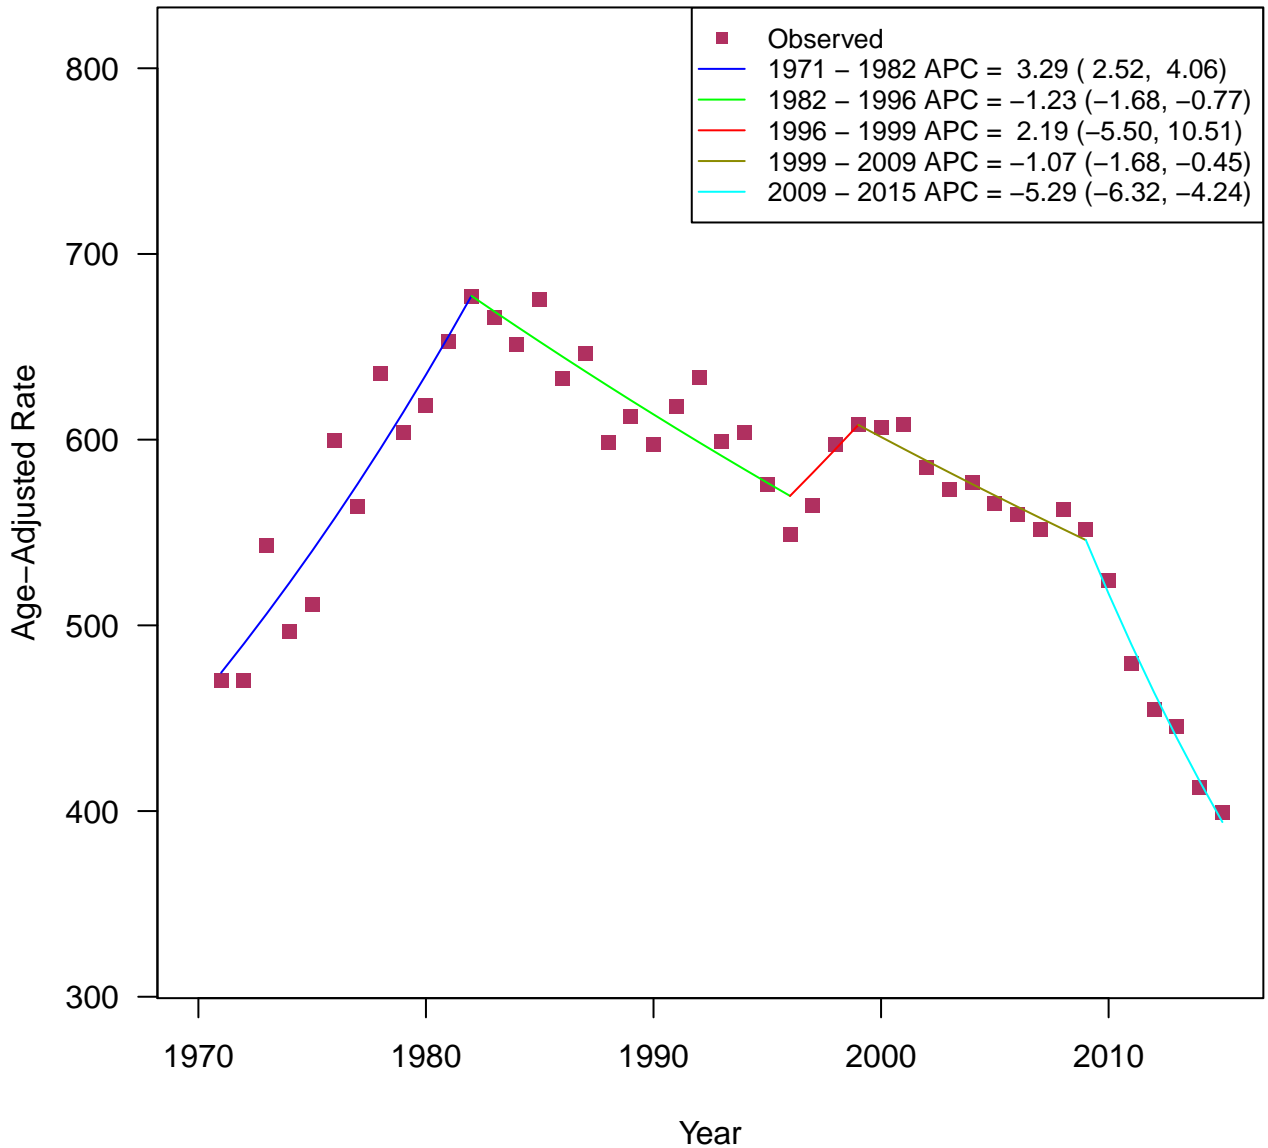

**Figure 122. Age-adjusted incidence rates of colorectal cancer in females aged 20–29 years in Canada, 1971–2015**

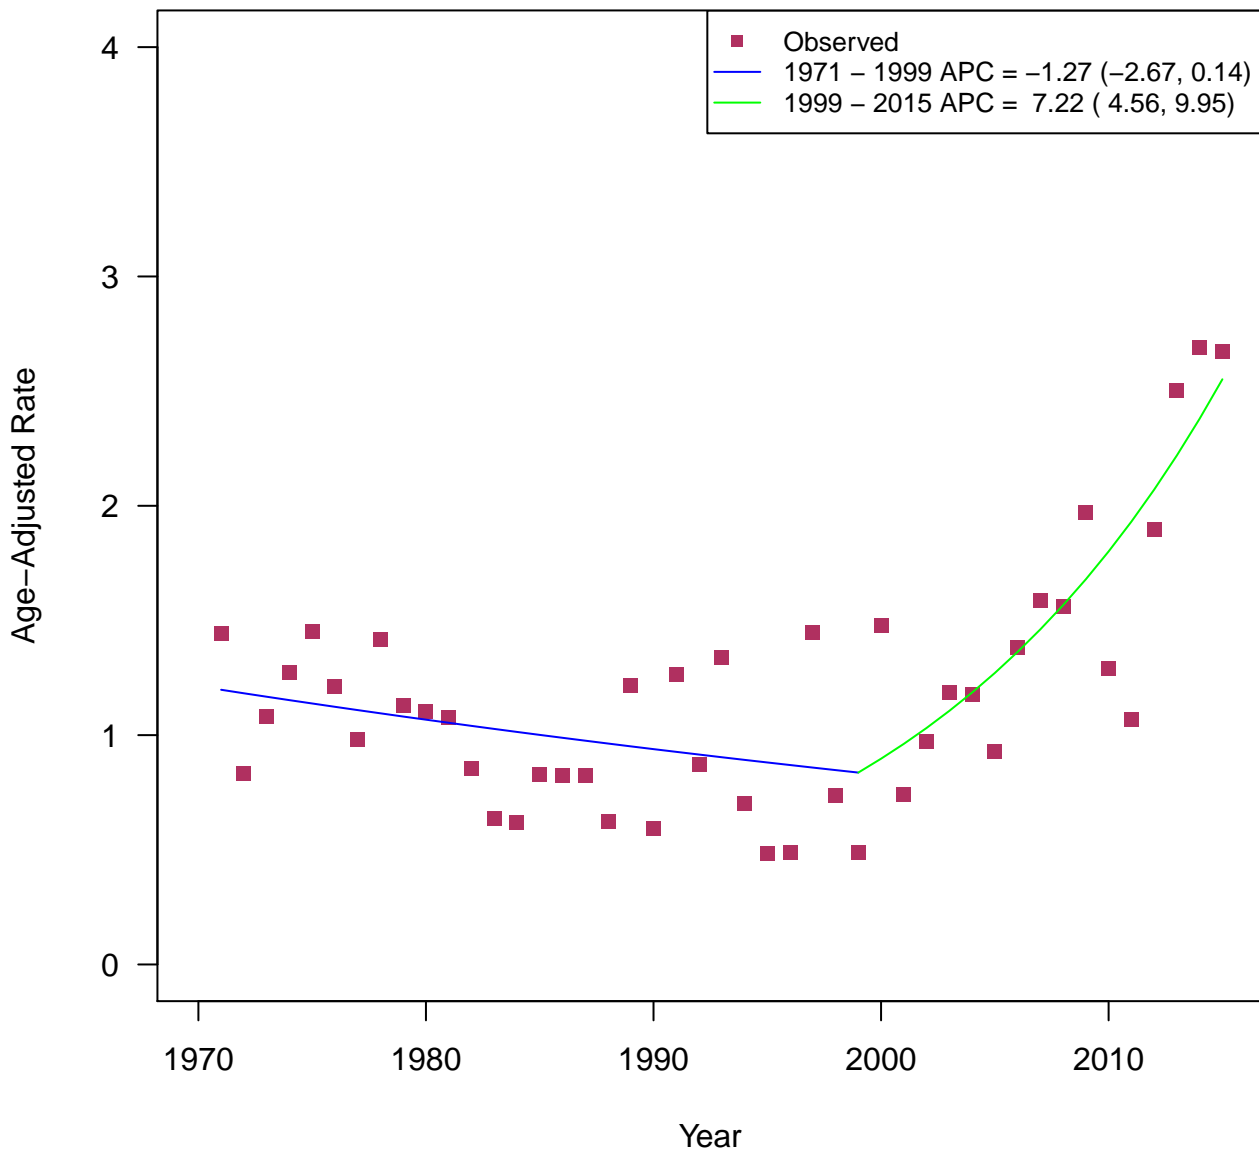

**Figure 123. Age-adjusted incidence rates of colorectal cancer in females aged 20–39 years in Canada, 1971–2015**

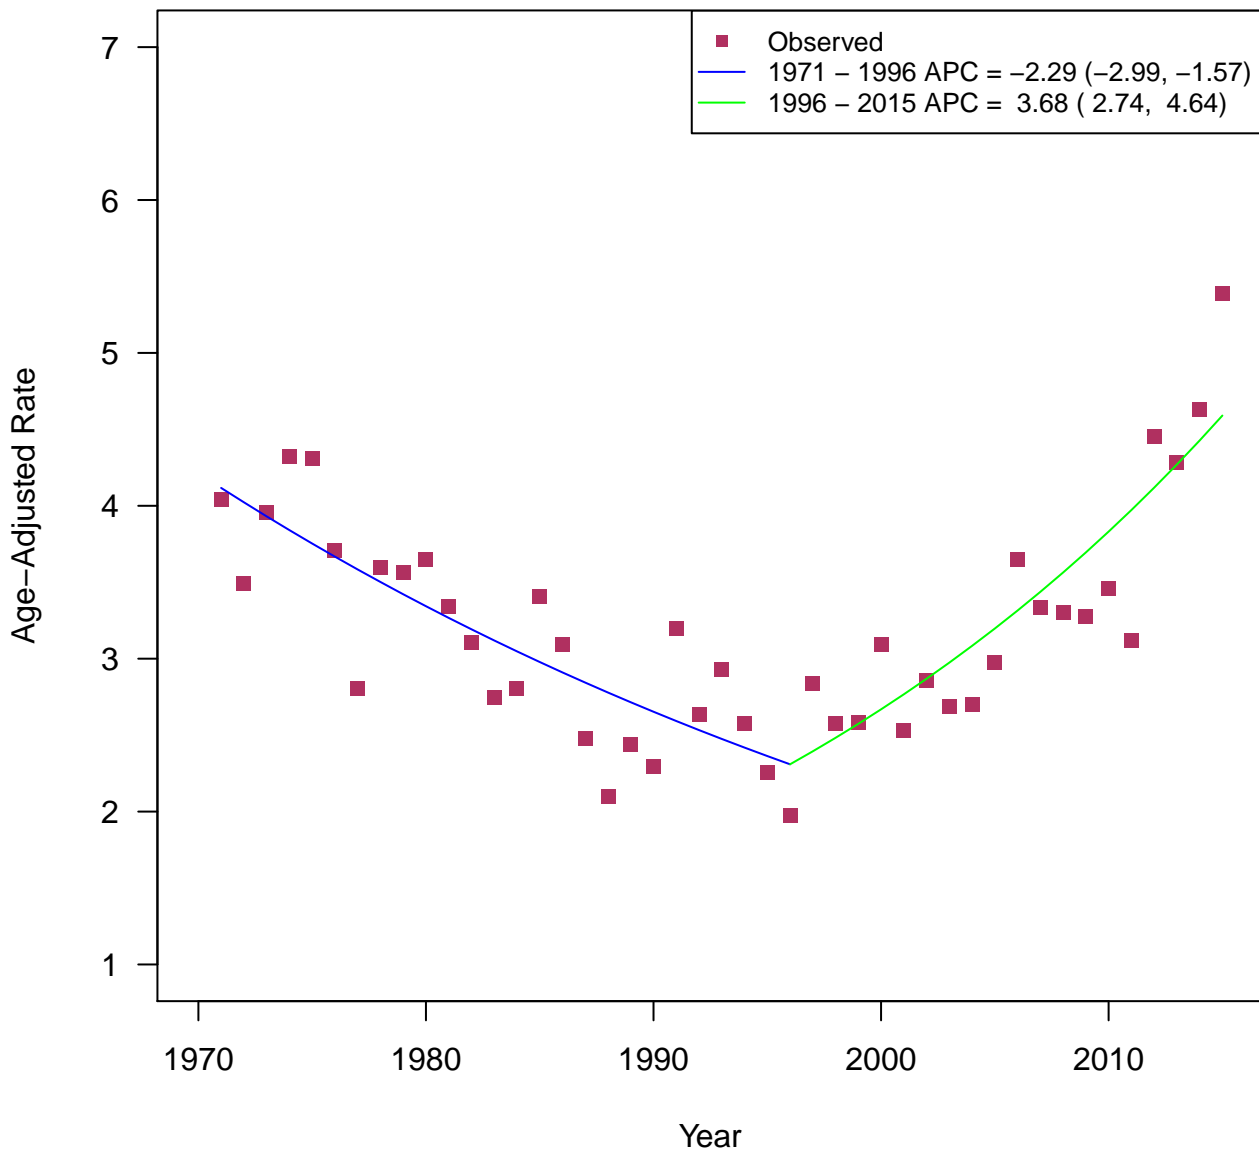



**Figure 124. Age-adjusted incidence rates of colorectal cancer in females aged 30–39 years in Canada, 1971–2015**

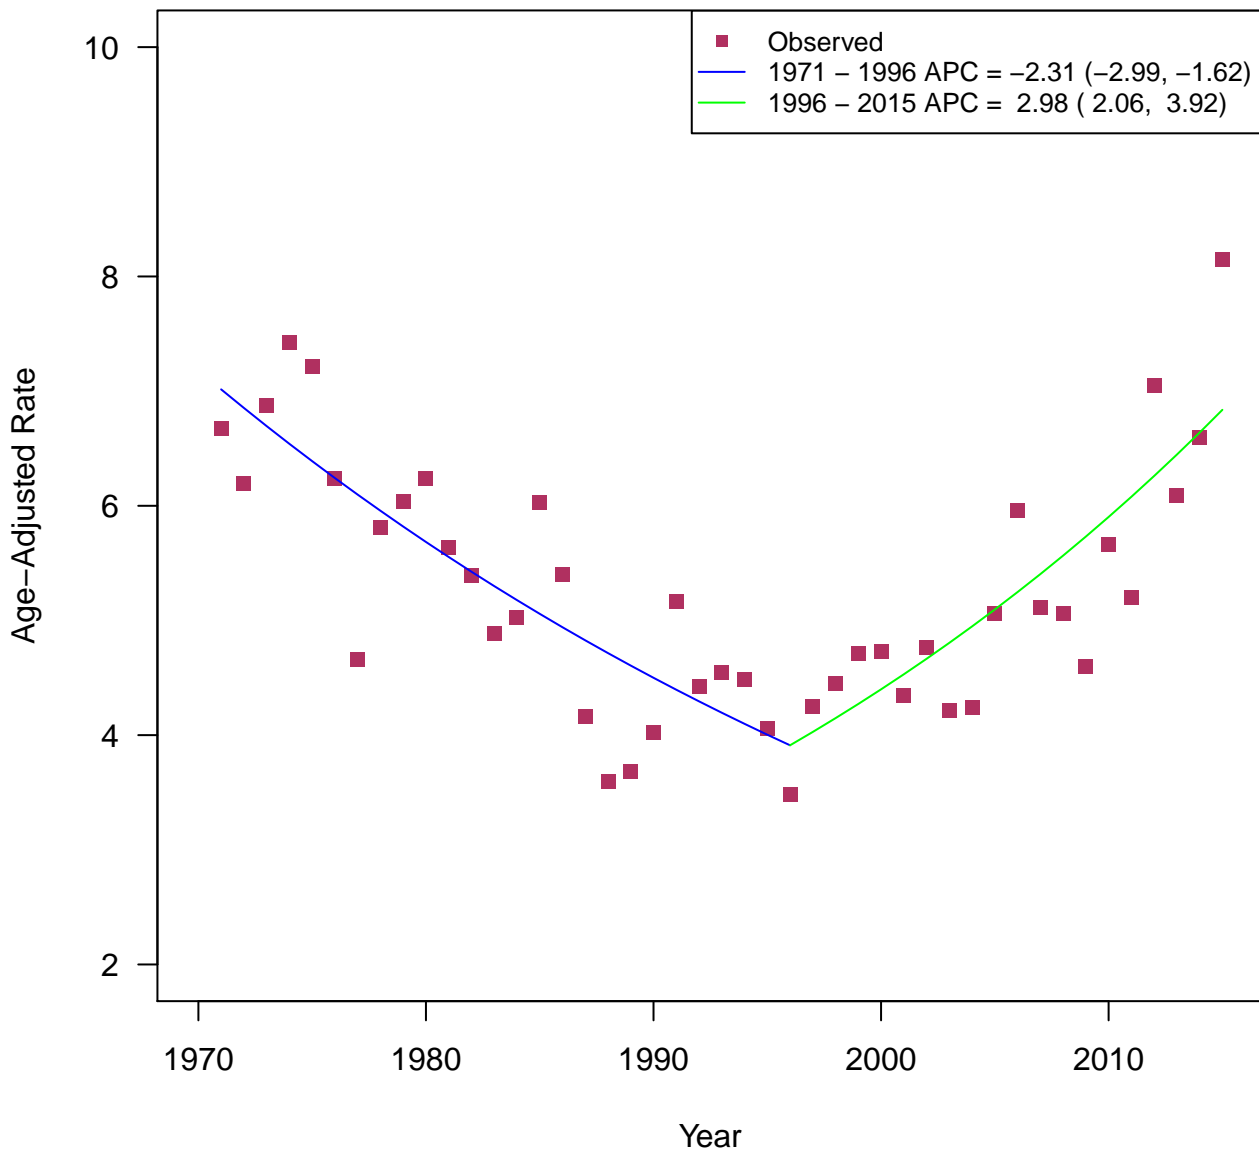

**Figure 125. Age-adjusted incidence rates of colorectal cancer in females aged 40–49 years in Canada, 1971–2015**

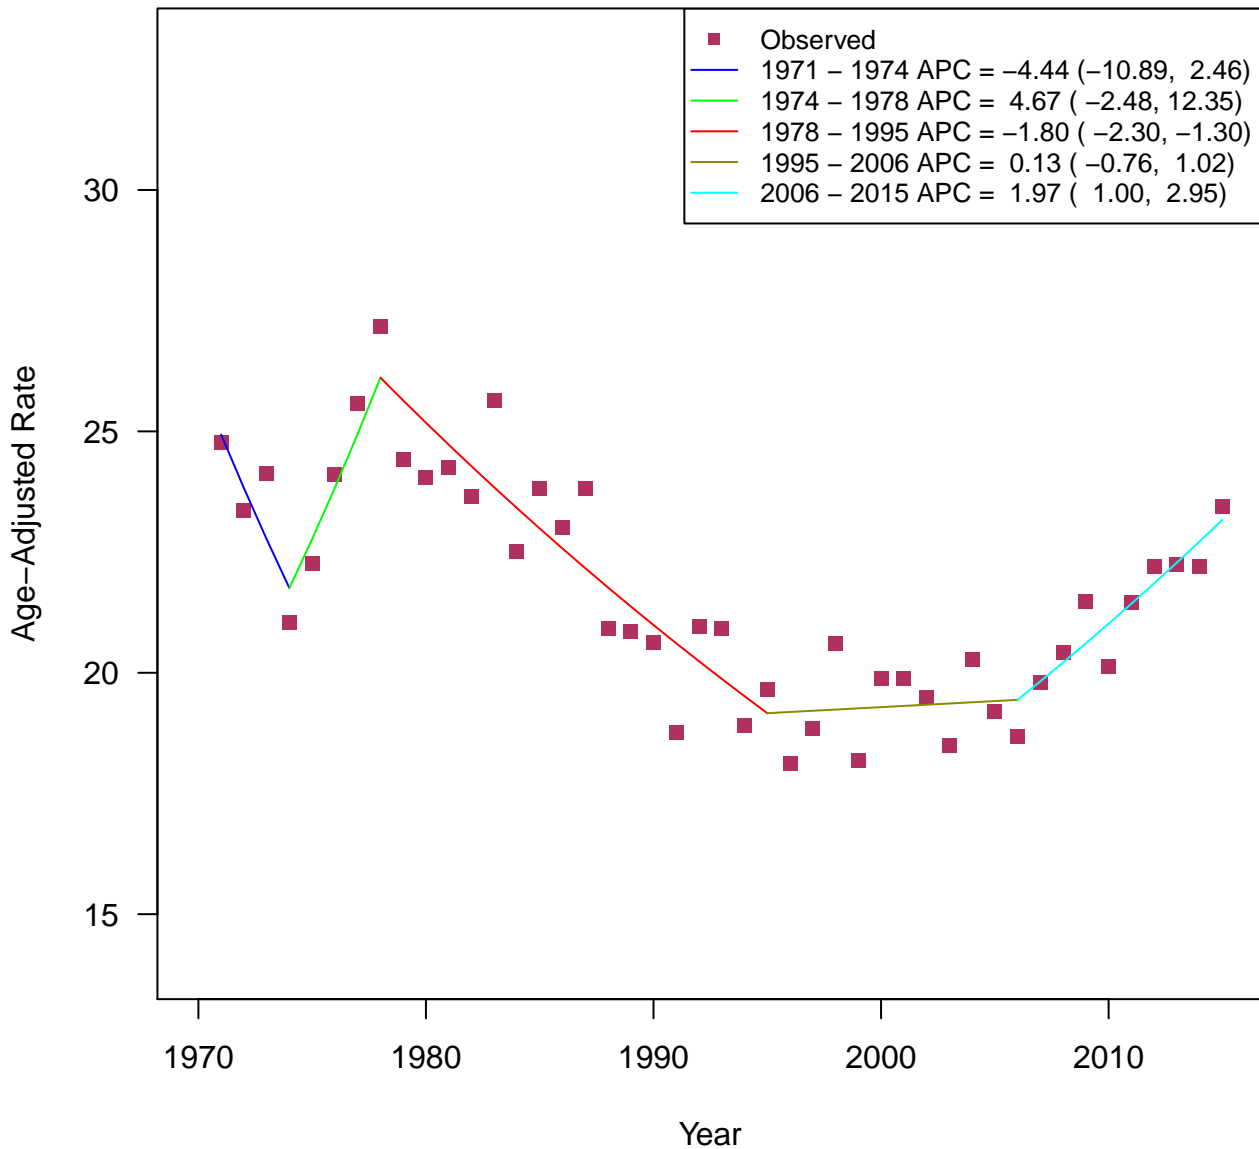

**Figure 126. Age-adjusted incidence rates of colorectal cancer in females aged 50–59 years in Canada, 1971–2015**

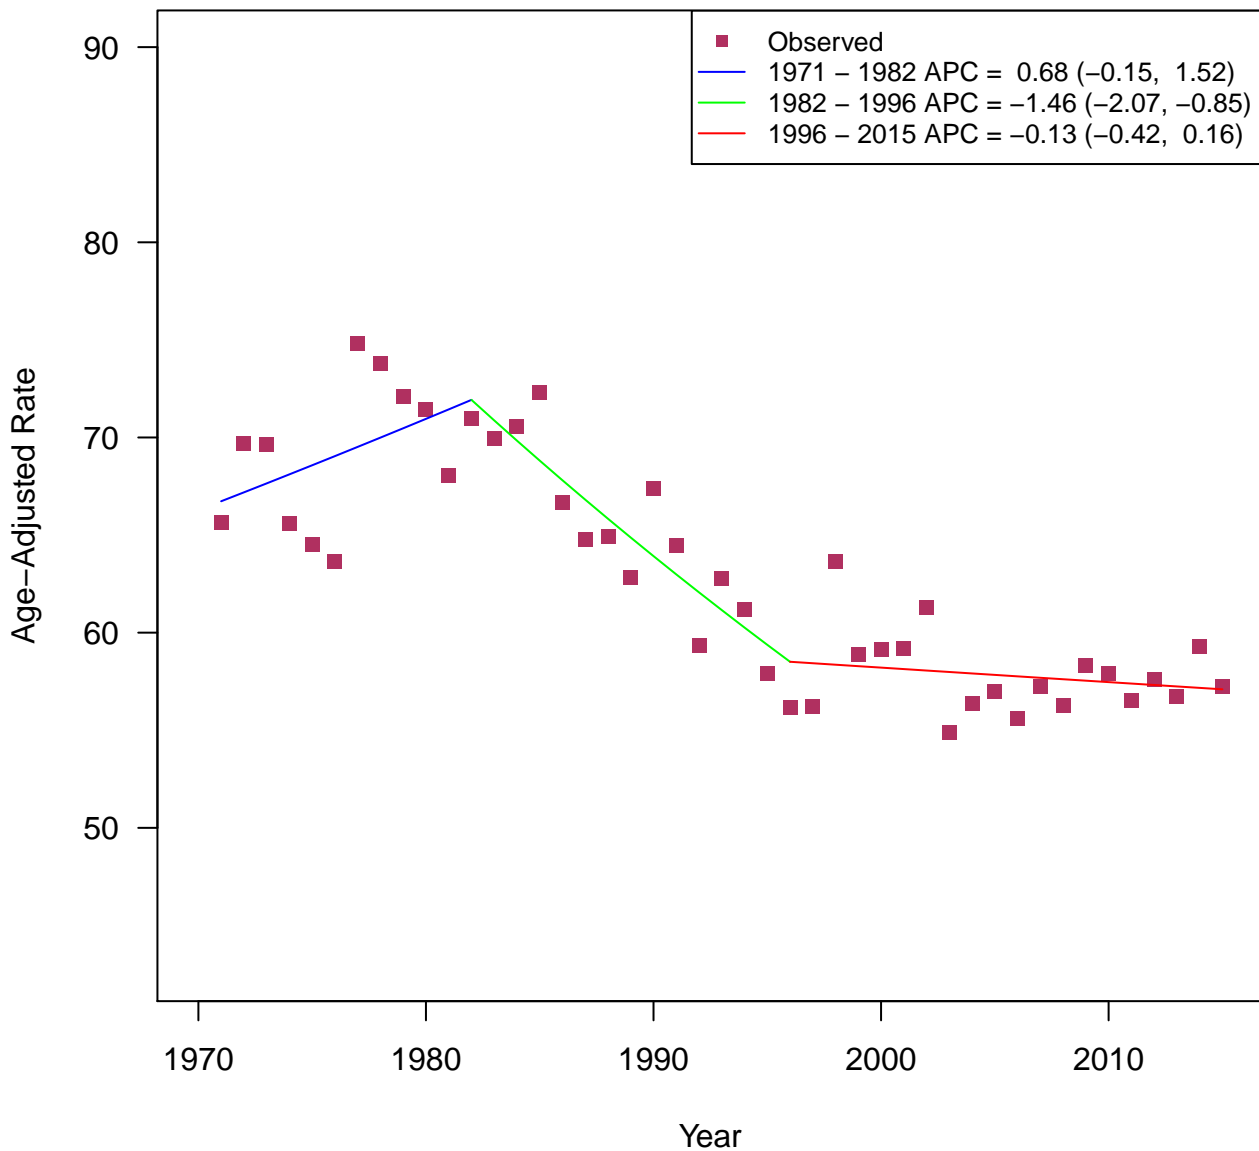

**Figure 127. Age-adjusted incidence rates of colorectal cancer in females aged 60–69 years in Canada, 1971–2015**

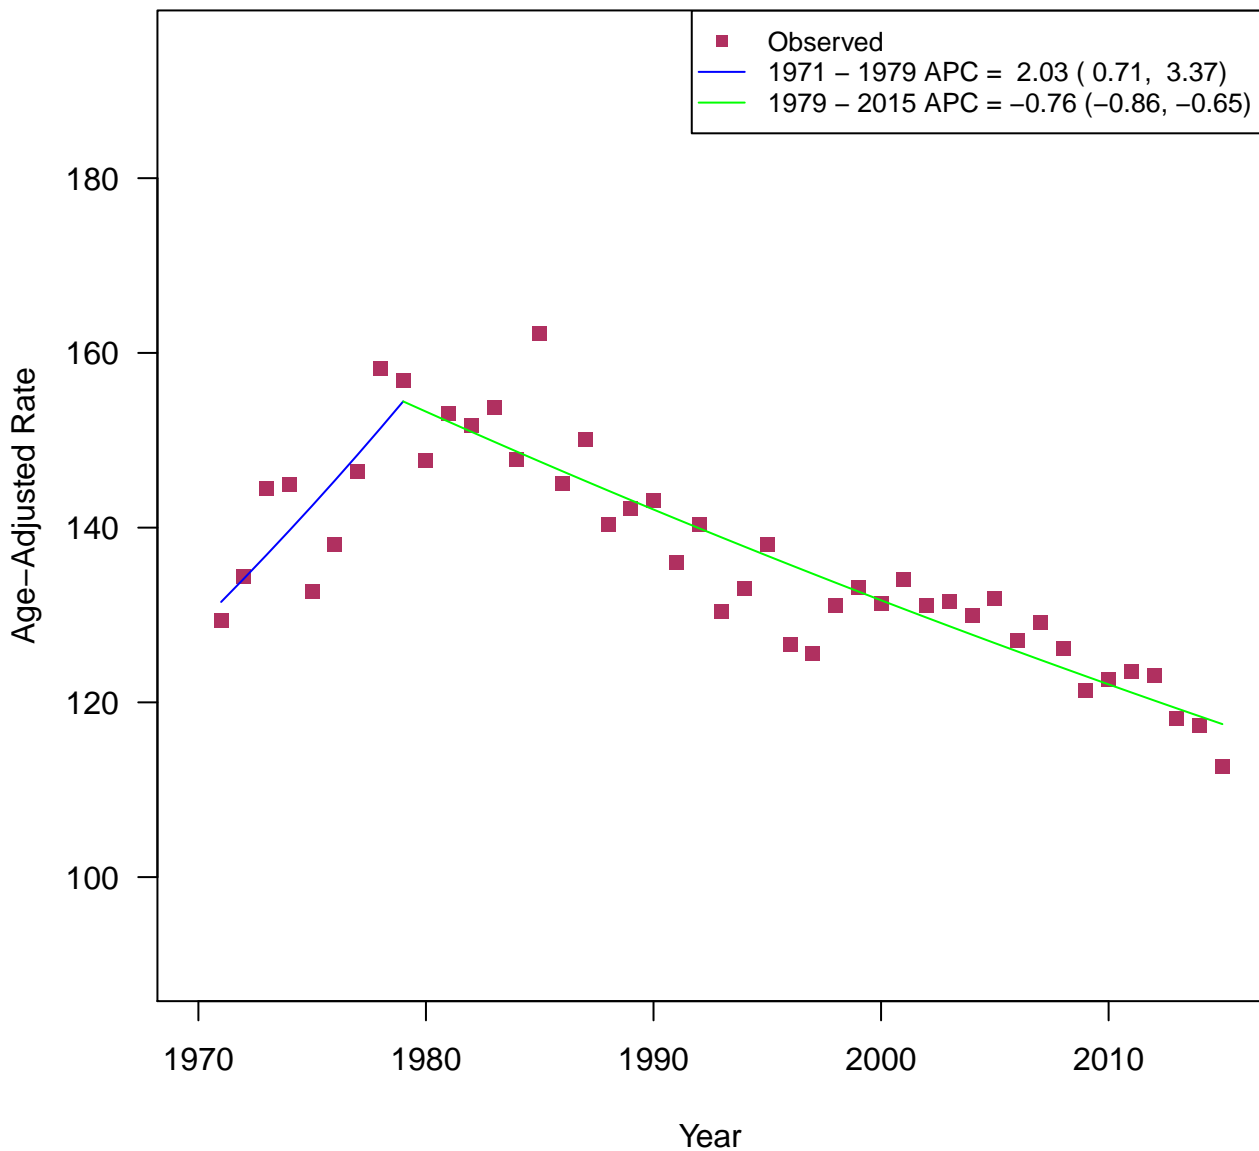

**Figure 128. Age-adjusted incidence rates of colorectal cancer in females aged 70–79 years in Canada, 1971–2015**

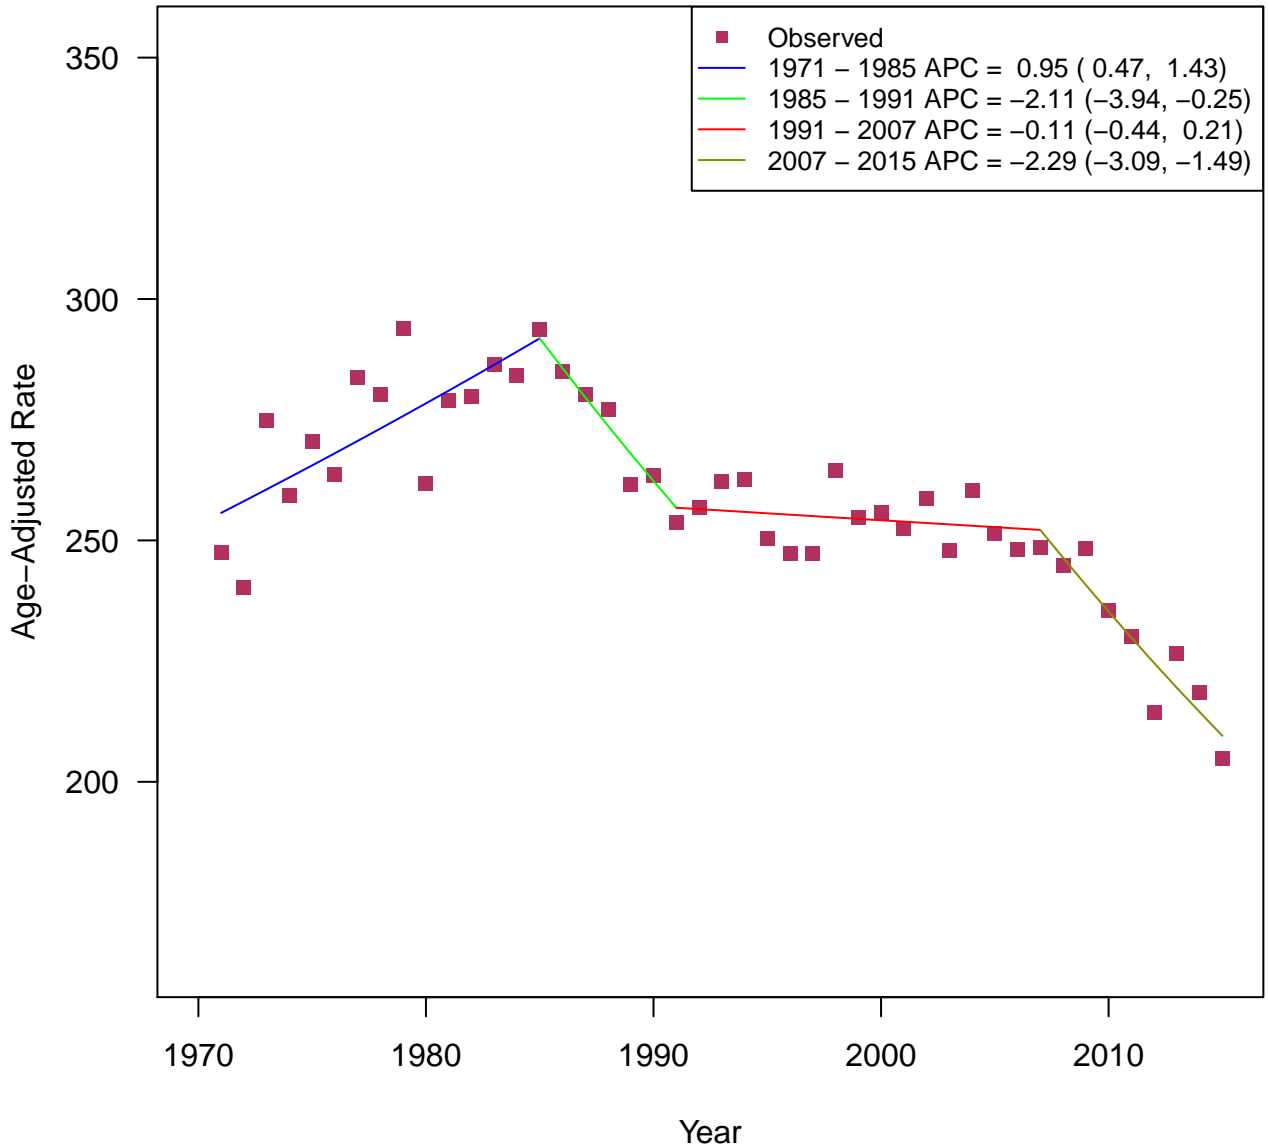

**Figure 129. Age-adjusted incidence rates of colorectal cancer in females aged 80–89 years in Canada, 1971–2015**

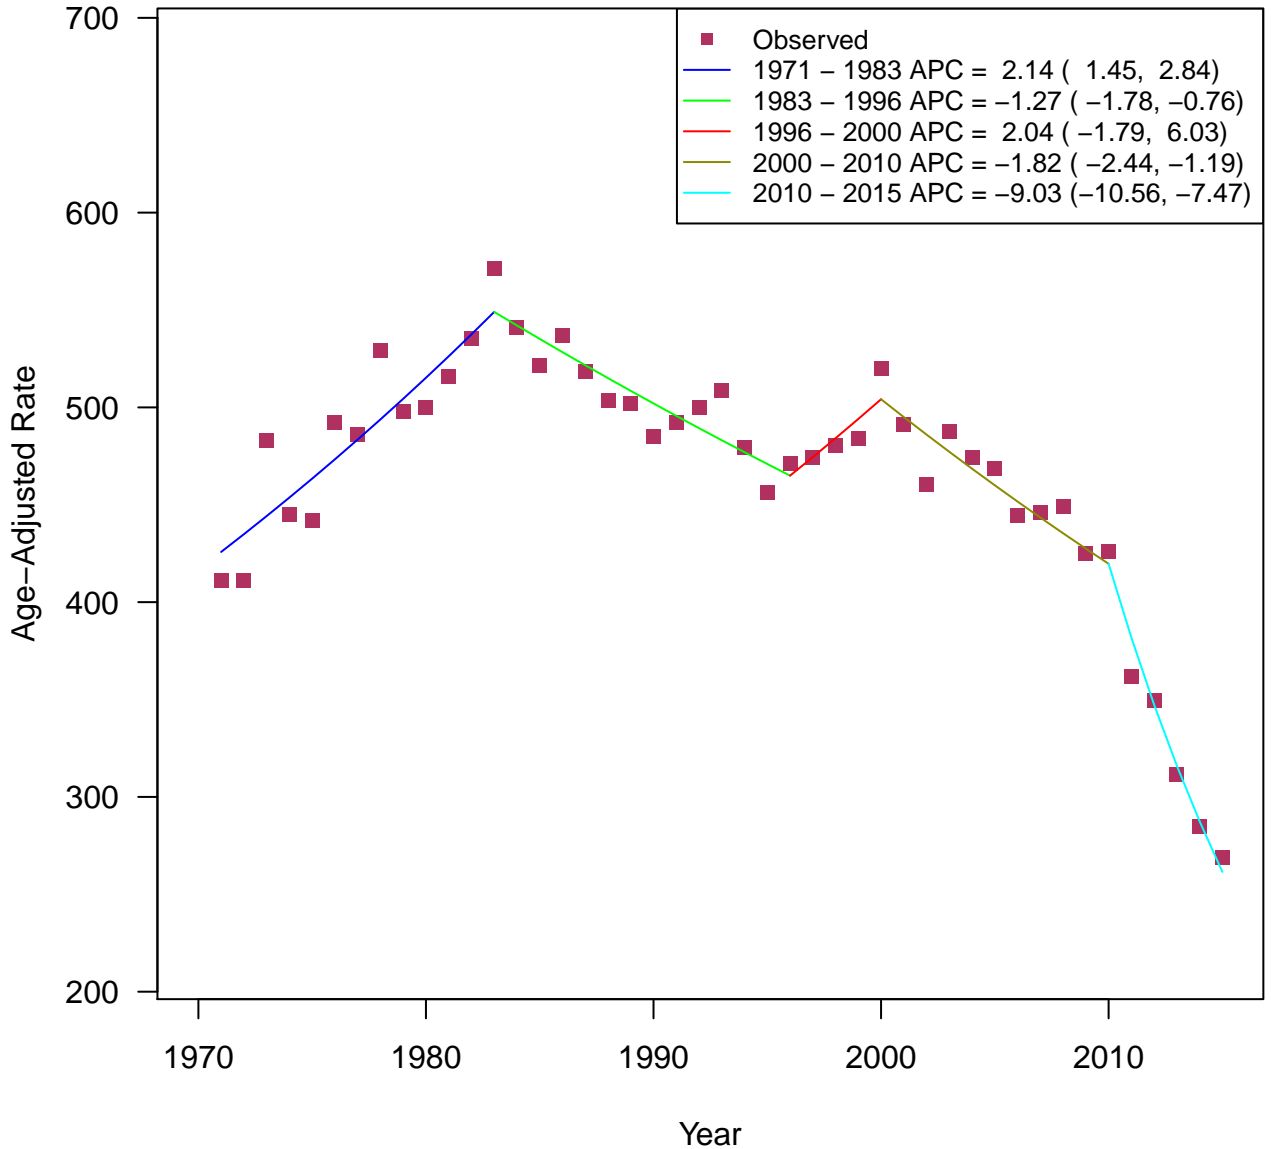

**Figure 130. Age-adjusted incidence rates of uterine cancer in females aged 20–29 years in Canada, 1971–2015**

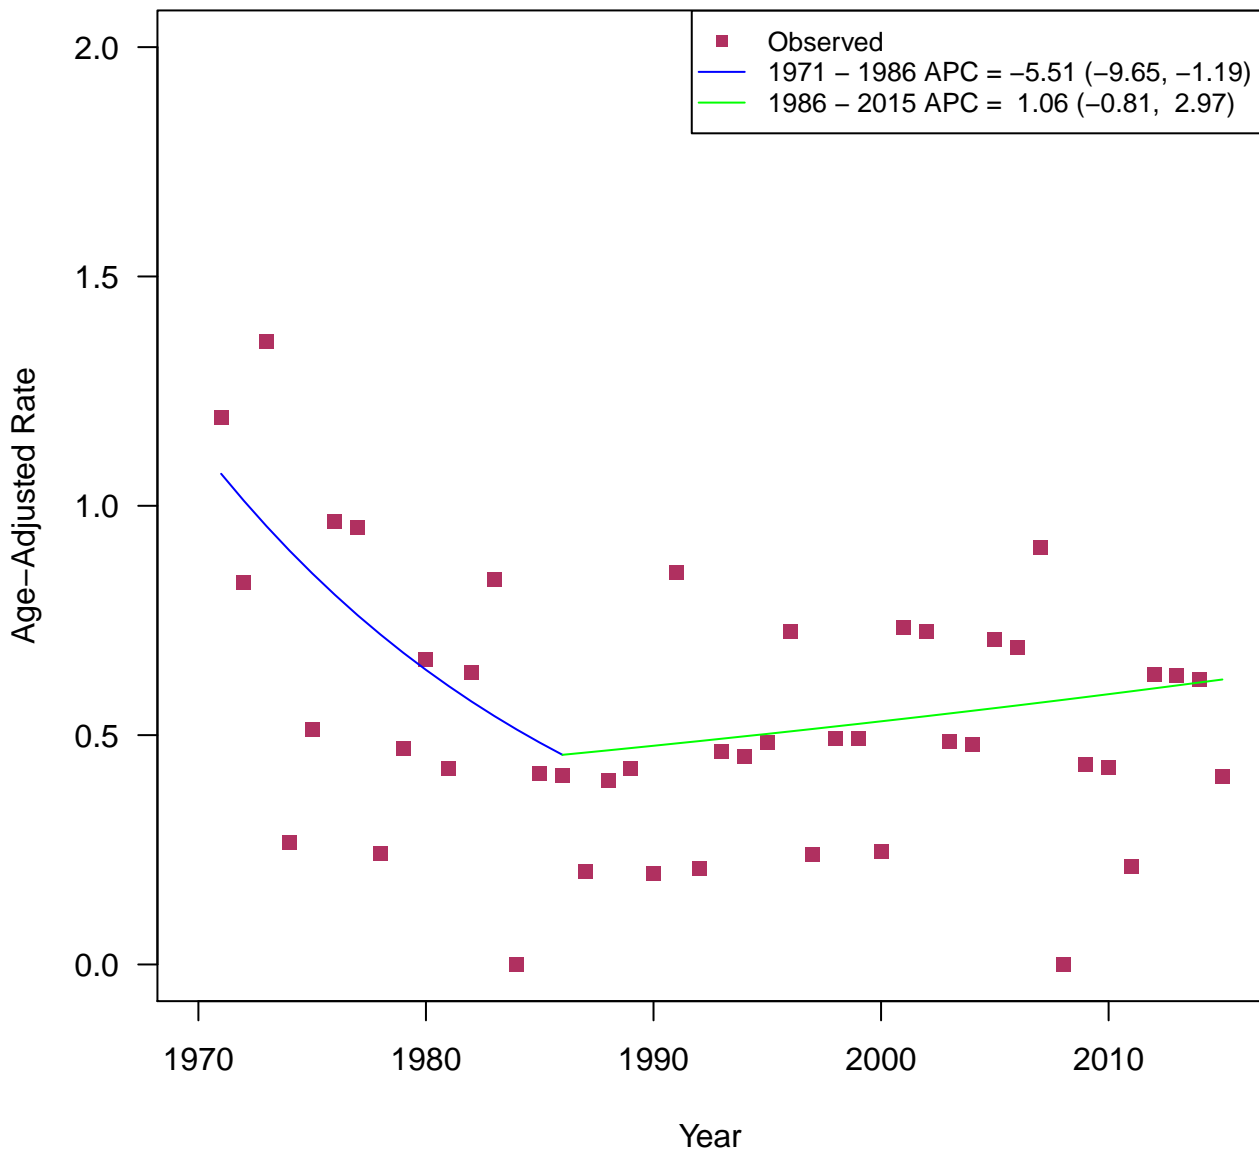

**Figure 131. Age-adjusted incidence rates of uterine cancer in females aged 20–39 years in Canada, 1971–2015**

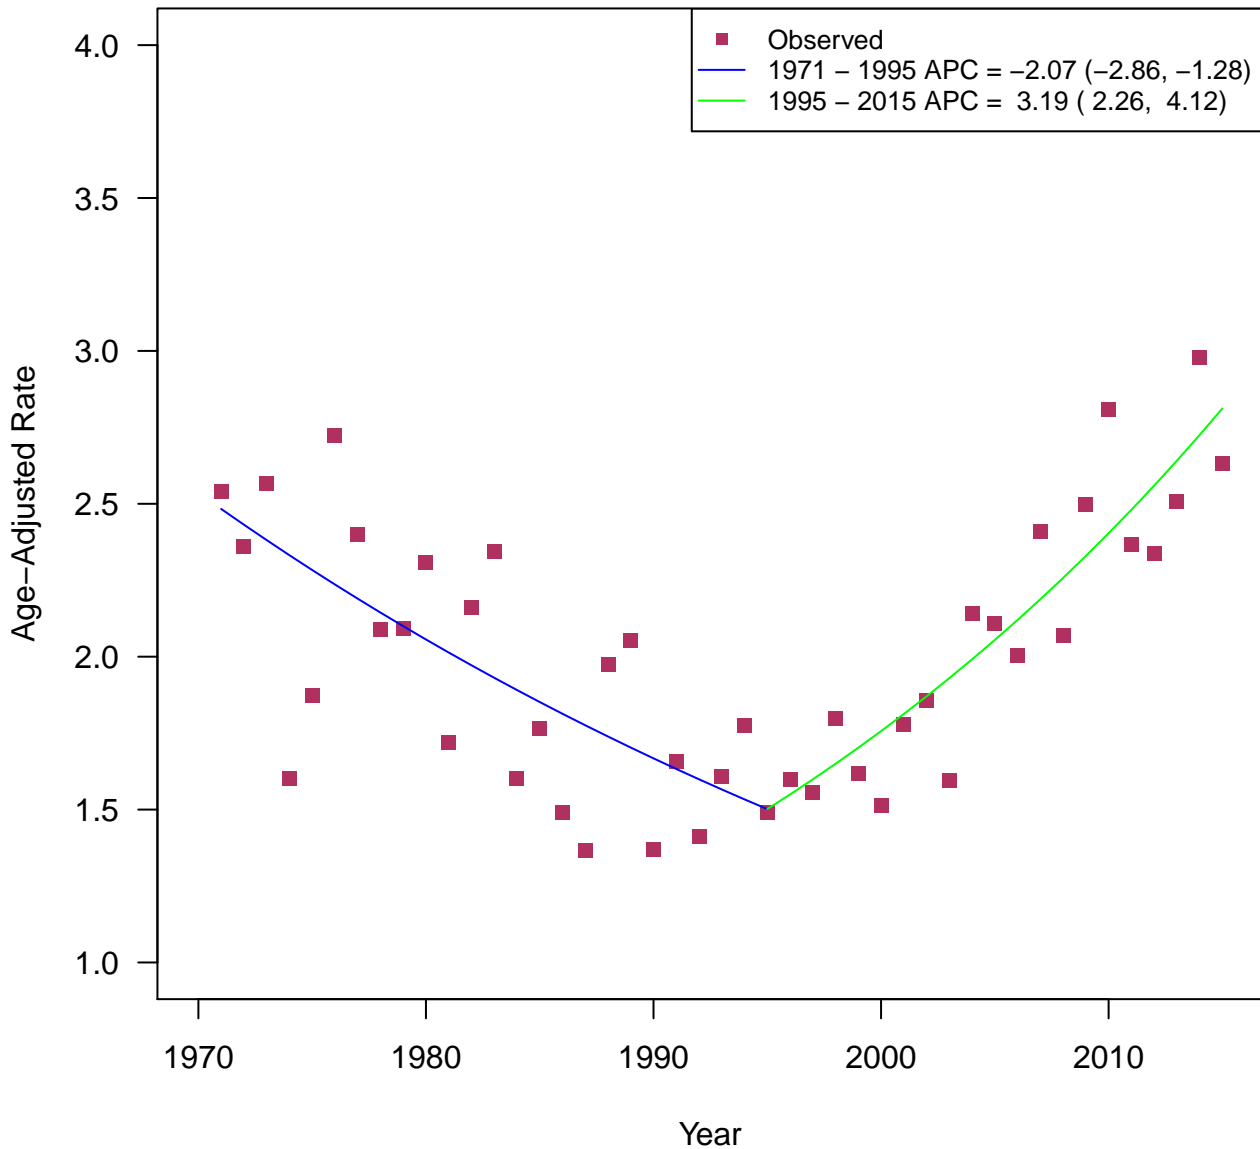



**Figure 132. Age-adjusted incidence rates of uterine cancer in females aged 30–39 years in Canada, 1971–2015**

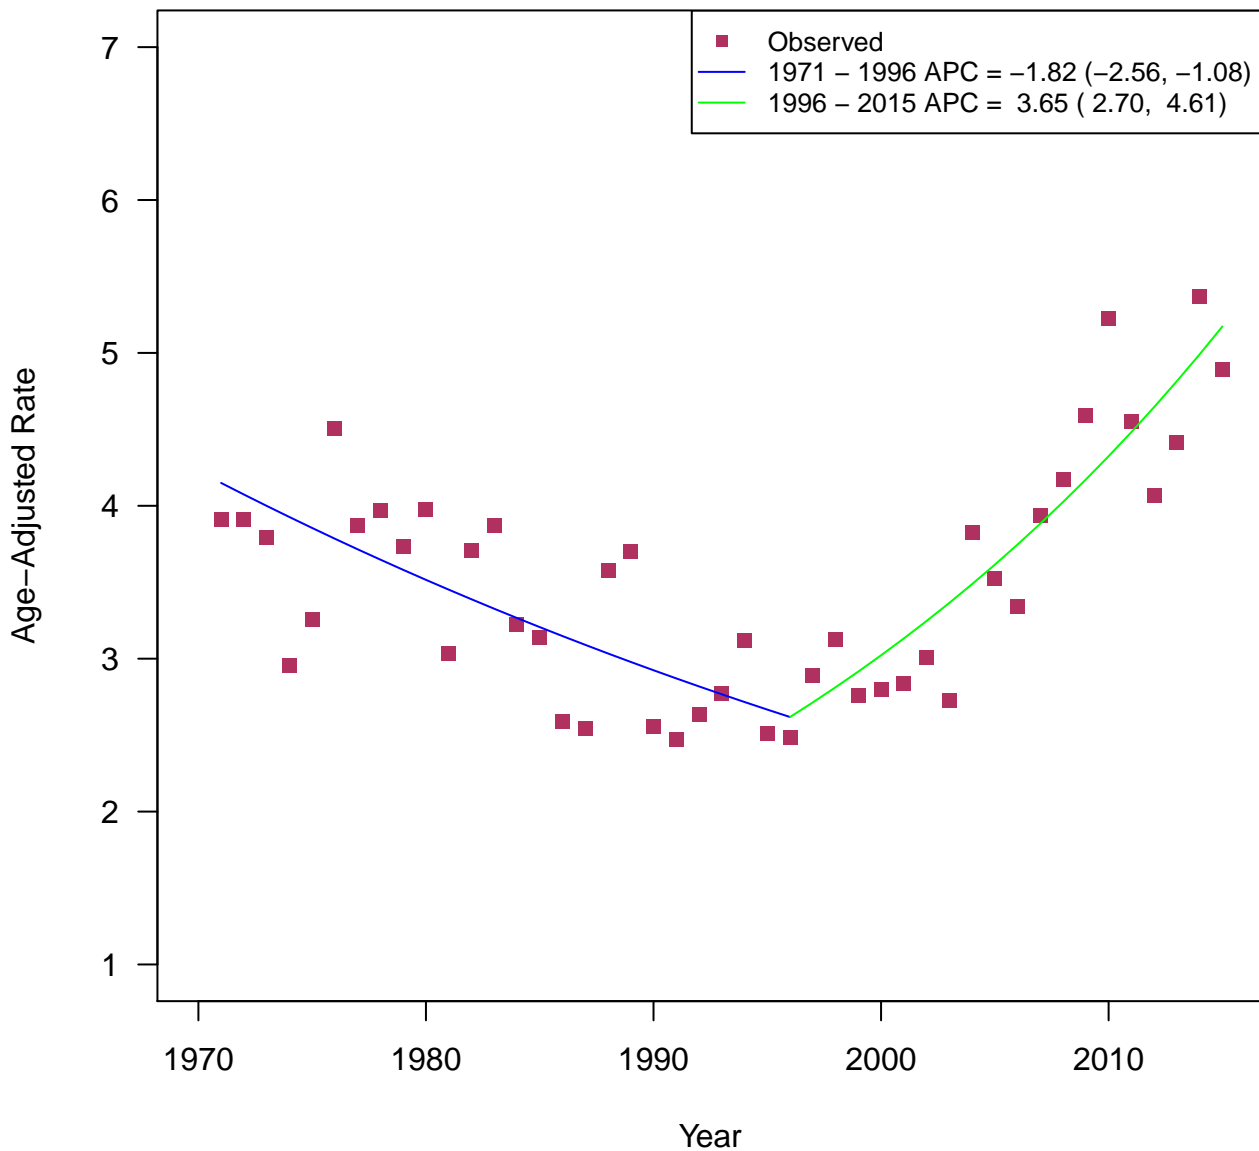

**Figure 133. Age-adjusted incidence rates of uterine cancer in females aged 40–49 years in Canada, 1971–2015**

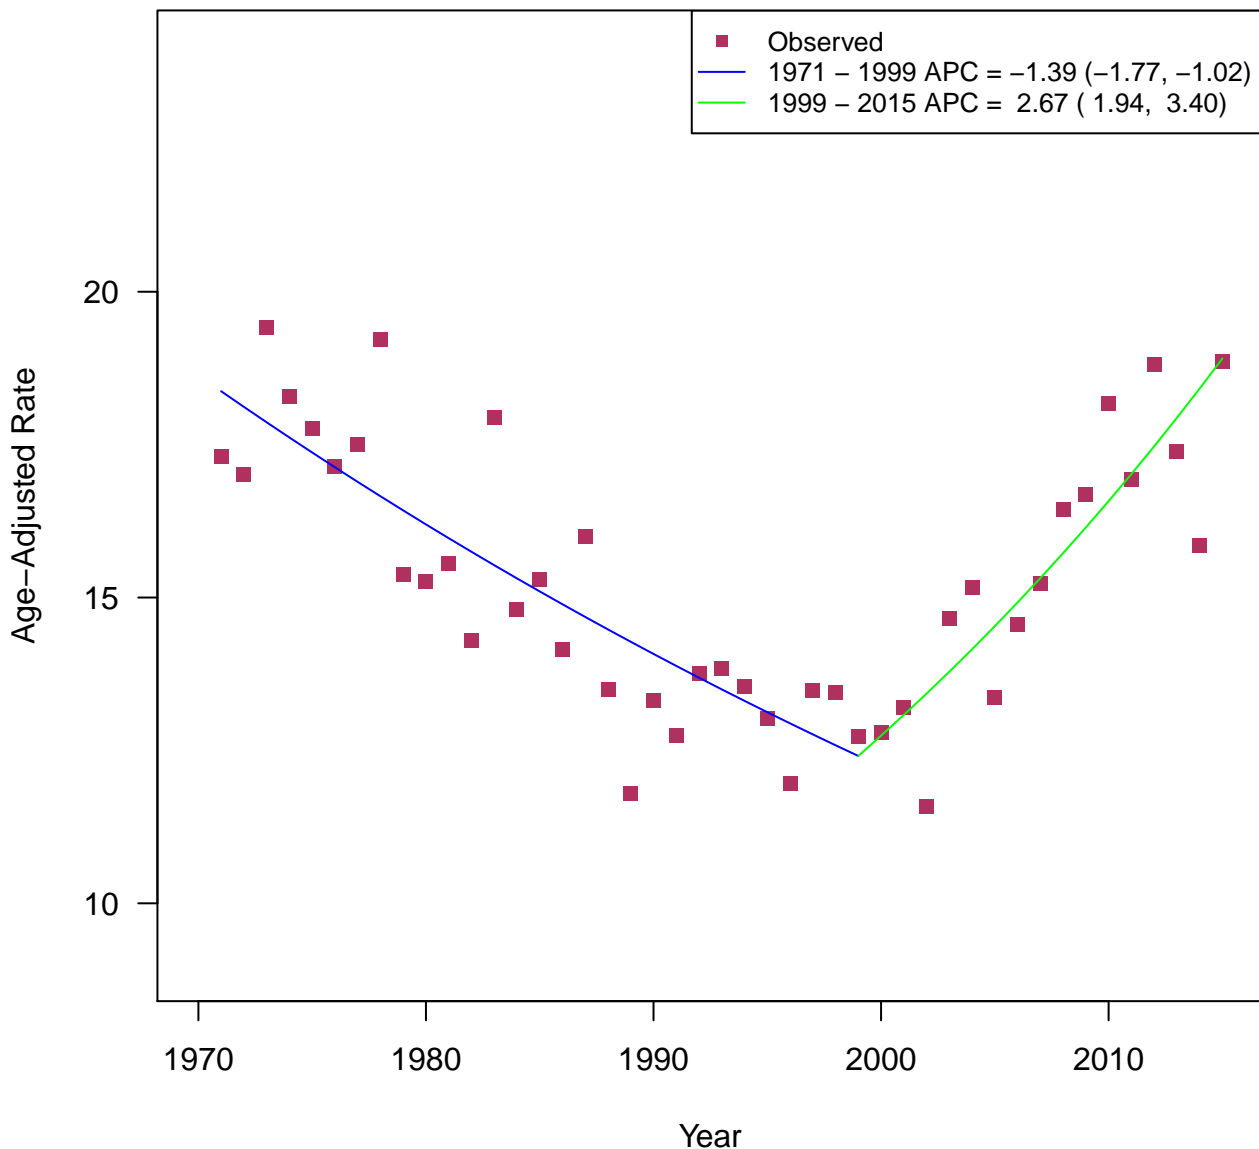

**Figure 134. Age-adjusted incidence rates of uterine cancer in females aged 50–59 years in Canada, 1971–2015**

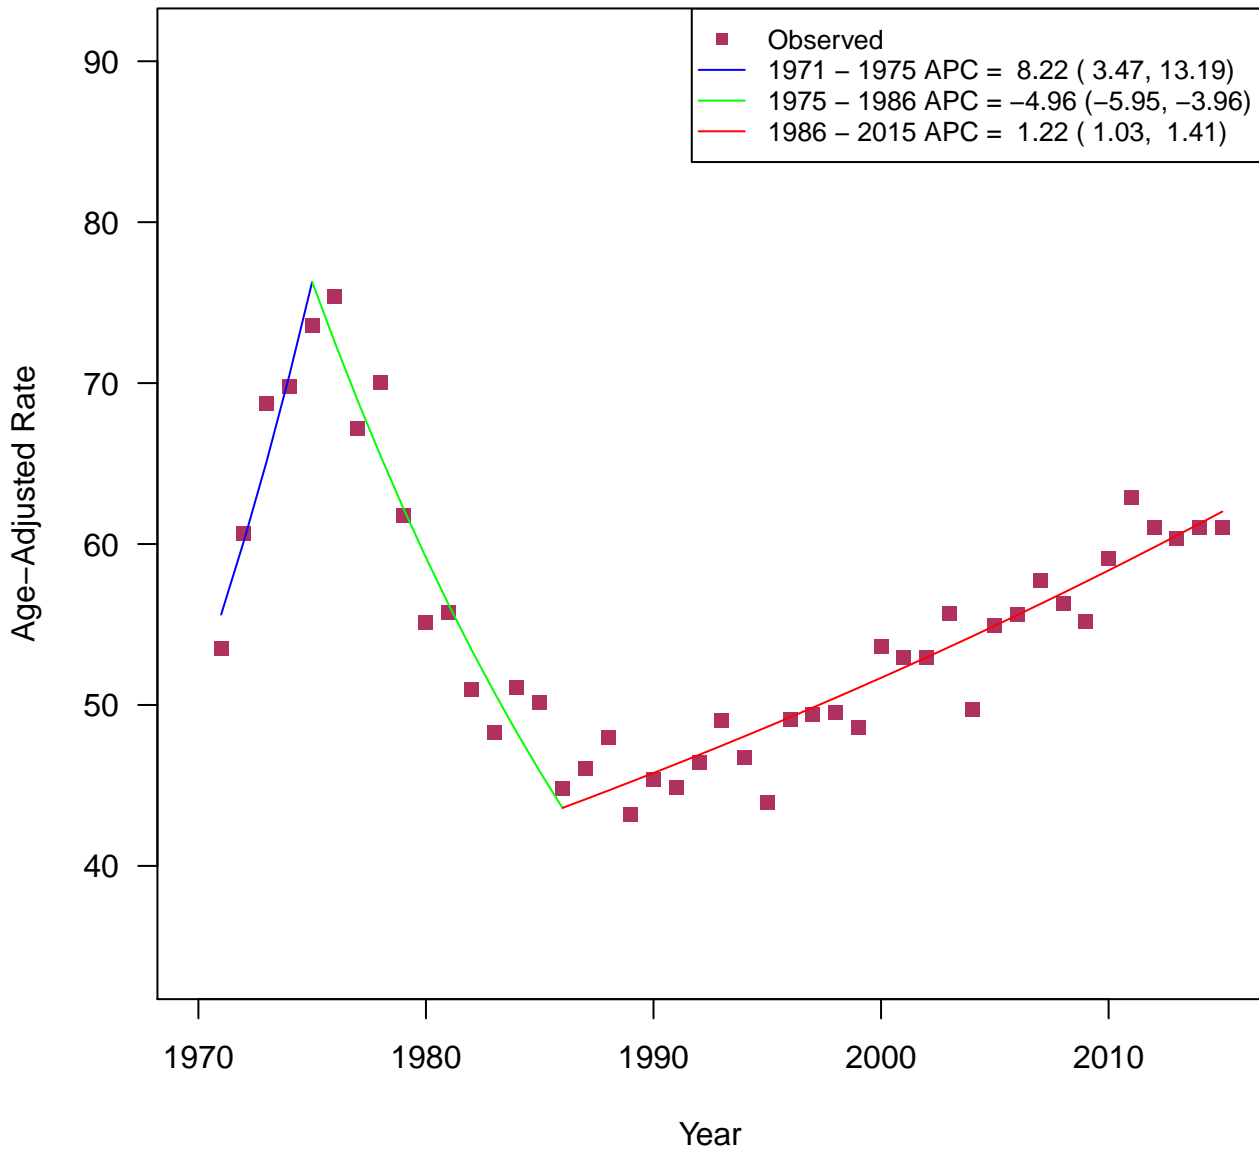

**Figure 135. Age-adjusted incidence rates of uterine cancer in females aged 60–69 years in Canada, 1971–2015**

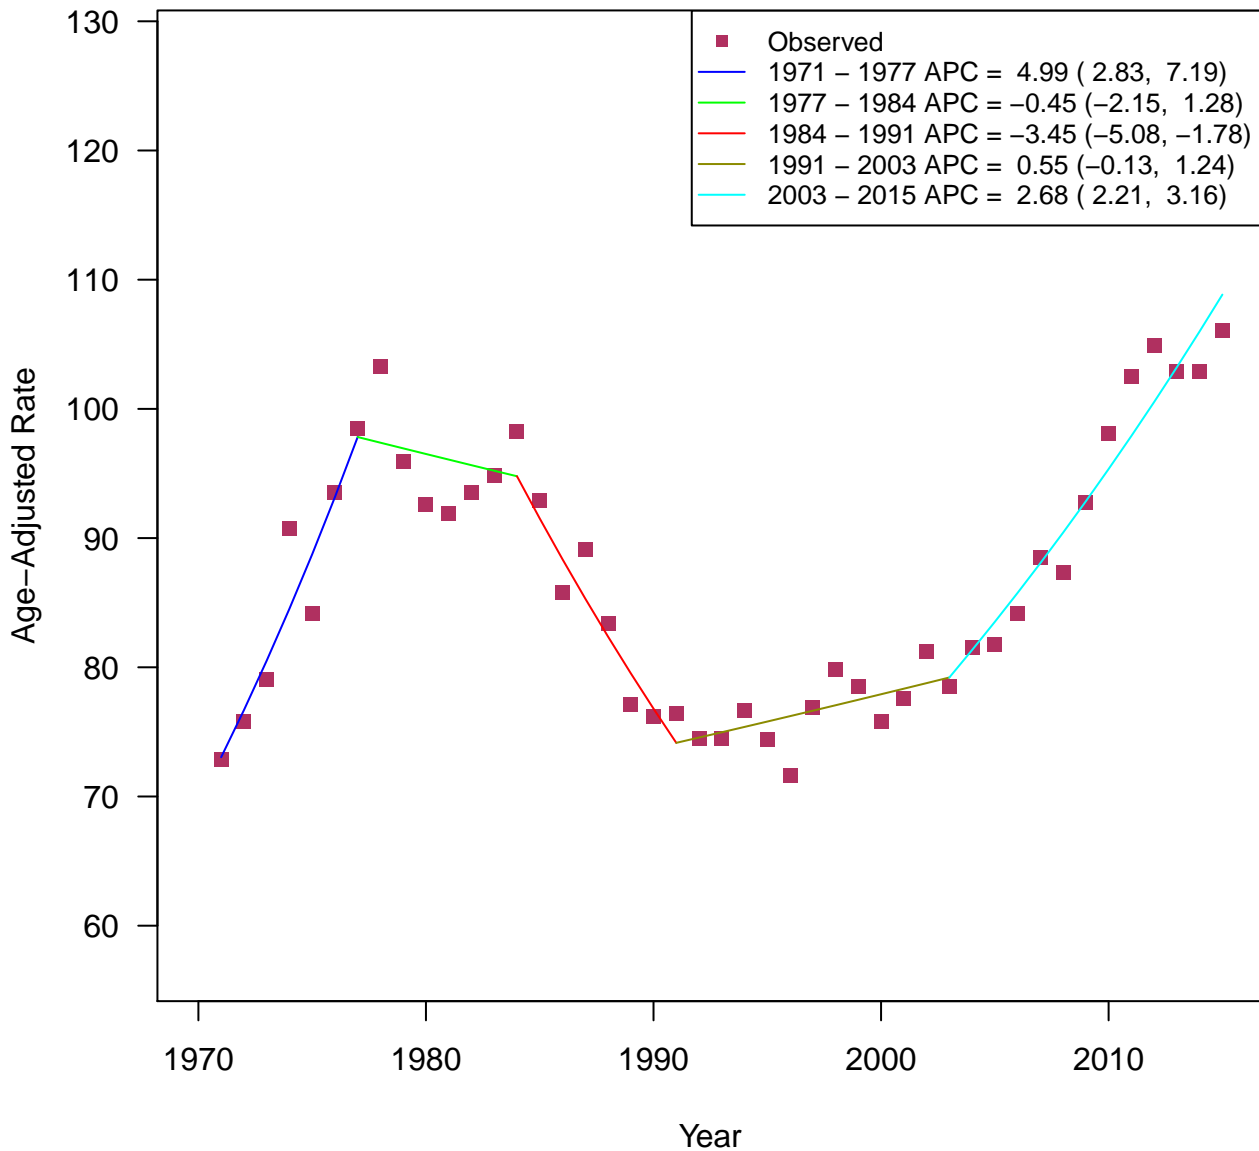

**Figure 136. Age-adjusted incidence rates of uterine cancer in females aged 70–79 years in Canada, 1971–2015**

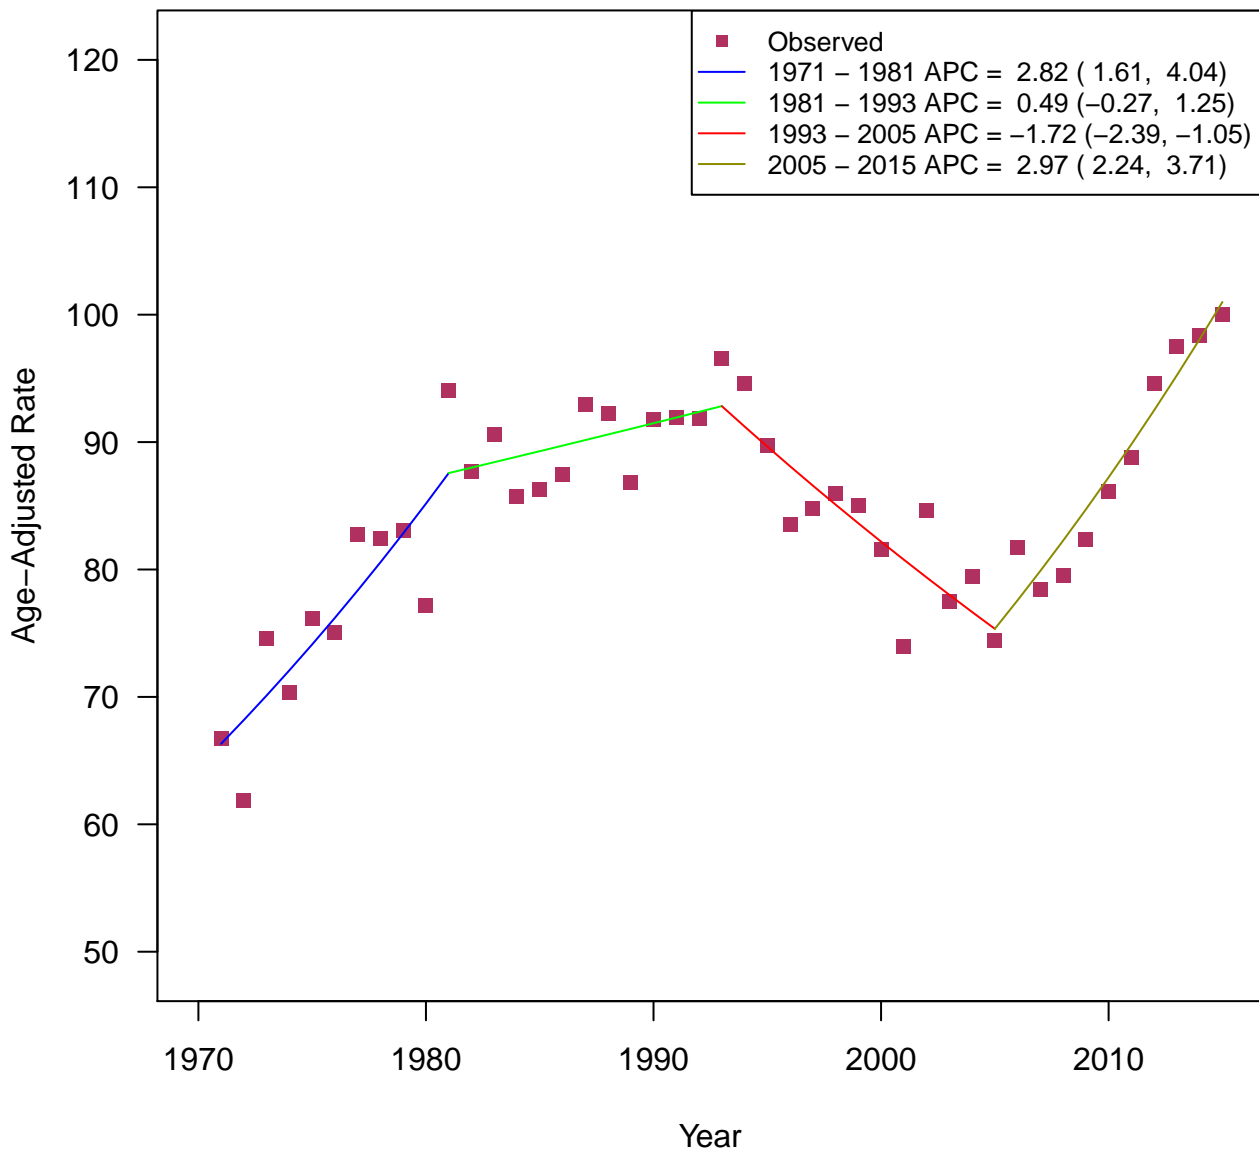

**Figure 137. Age-adjusted incidence rates of uterine cancer in females aged 80–89 years in Canada, 1971–2015**

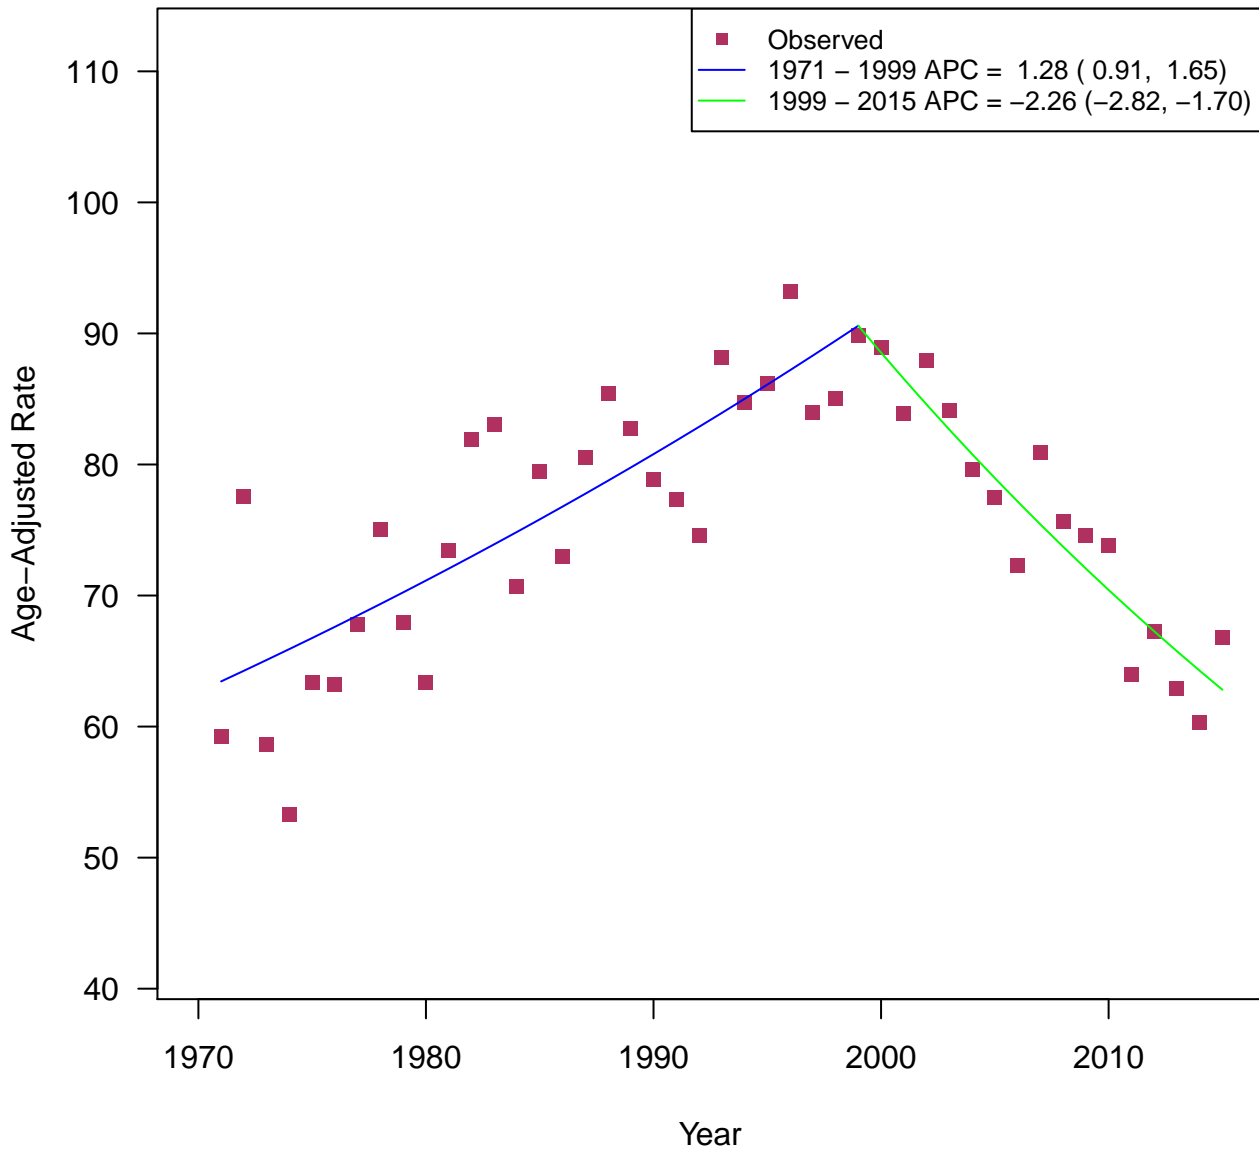

**Figure 138. Age-adjusted incidence rates of esophageal cancer in males aged 20–29 years in Canada, 1971–2015**

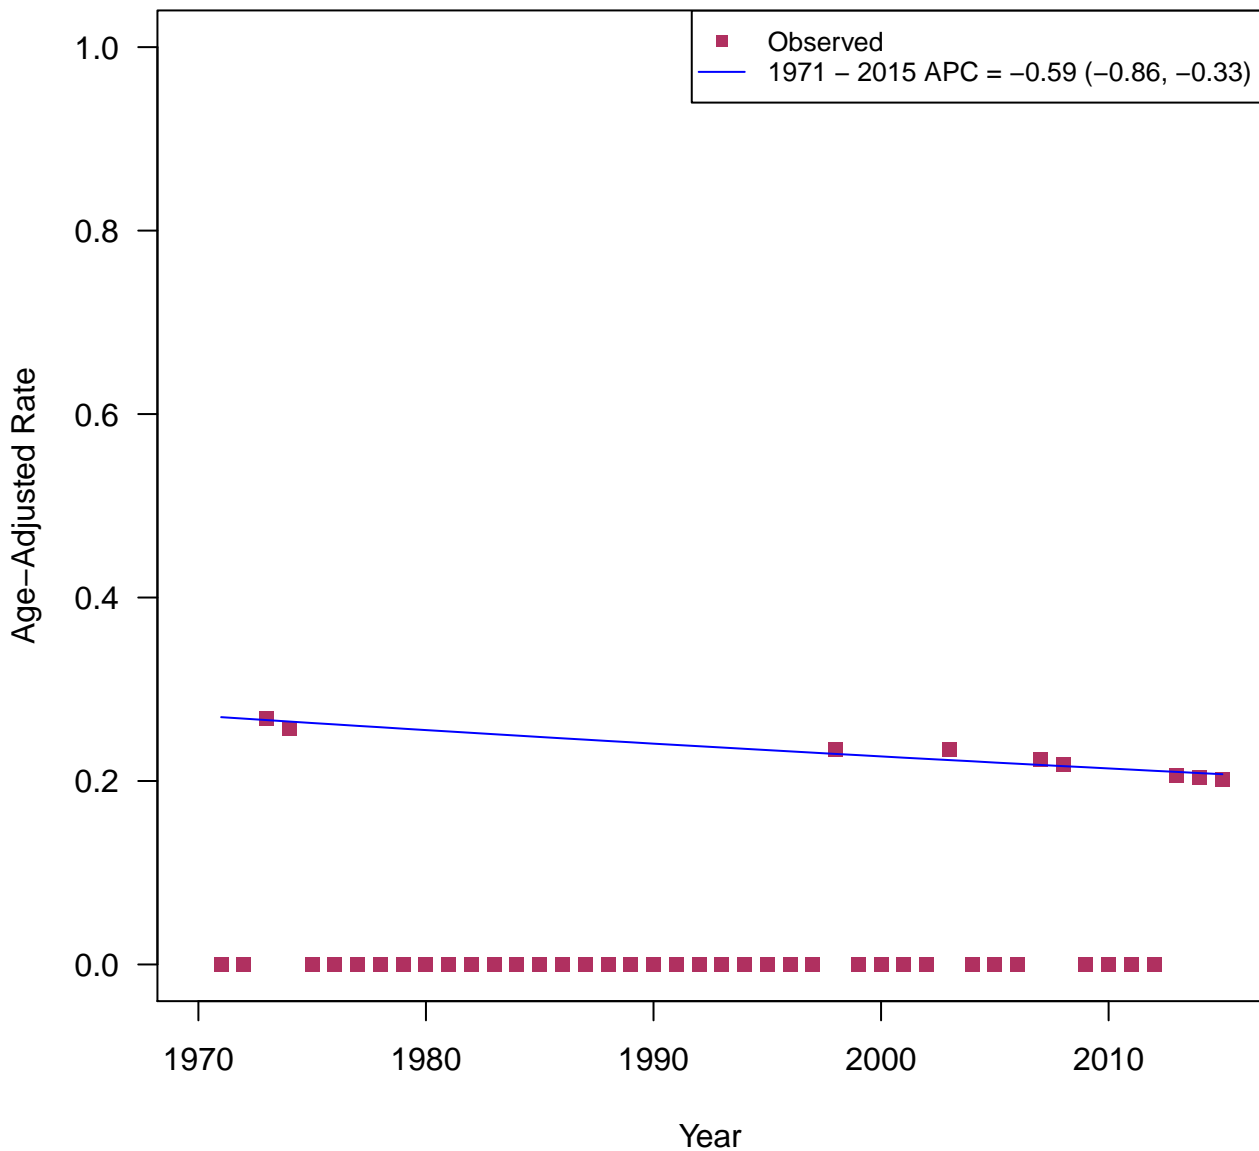

**Figure 139. Age-adjusted incidence rates of esophageal cancer in males aged 20–39 years in Canada, 1971–2015**

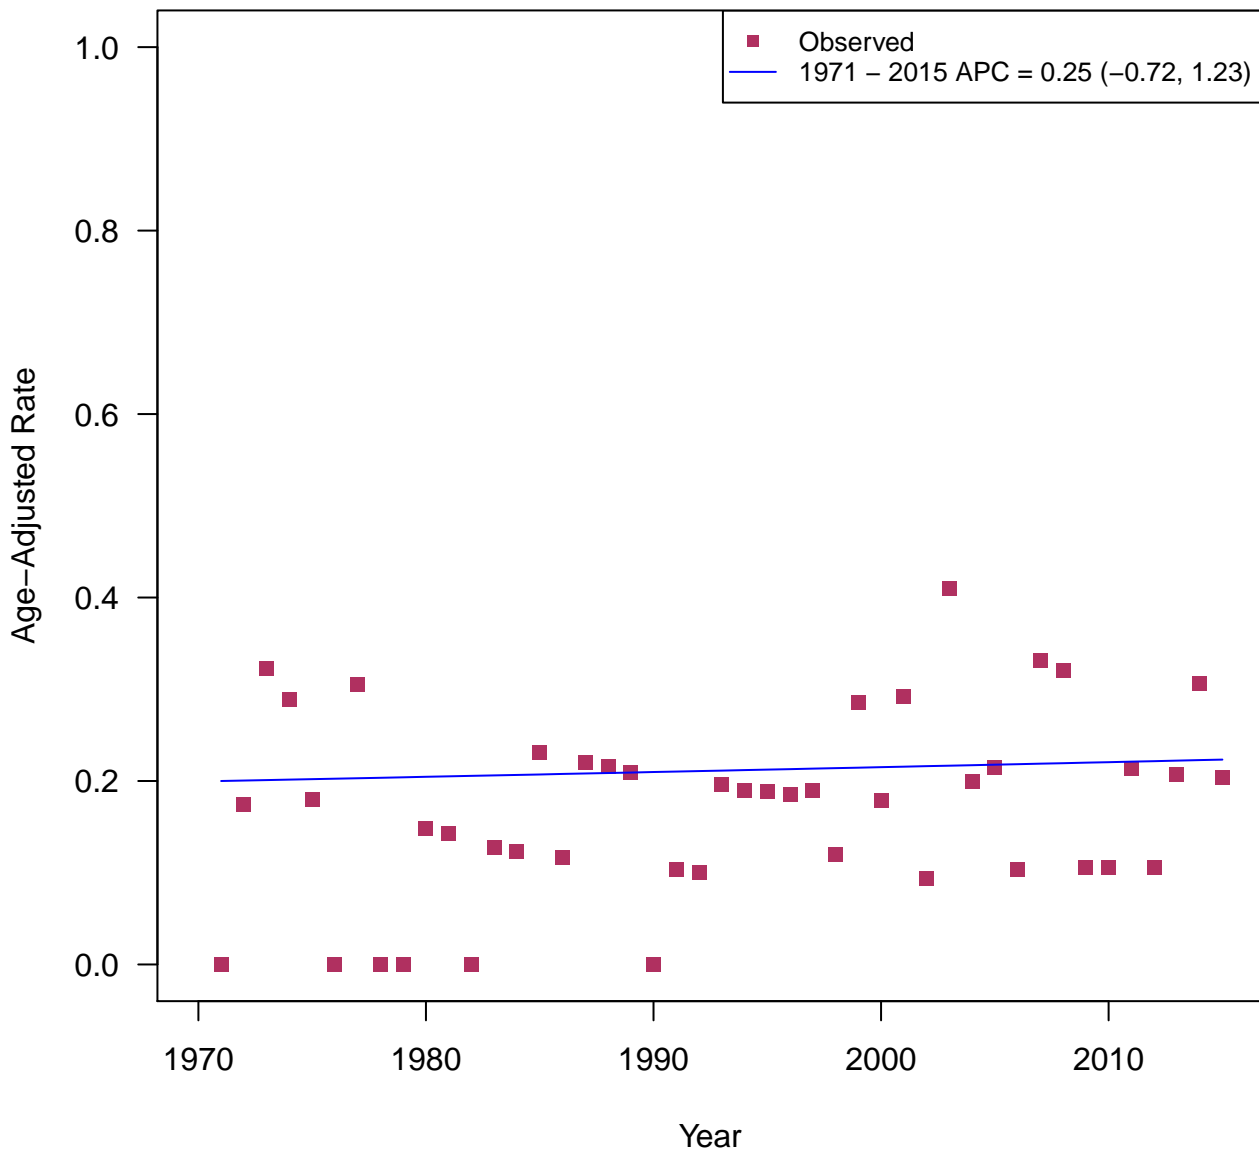



**Figure 140. Age-adjusted incidence rates of esophageal cancer in males aged 20–49 years in Canada, 1971–2015**

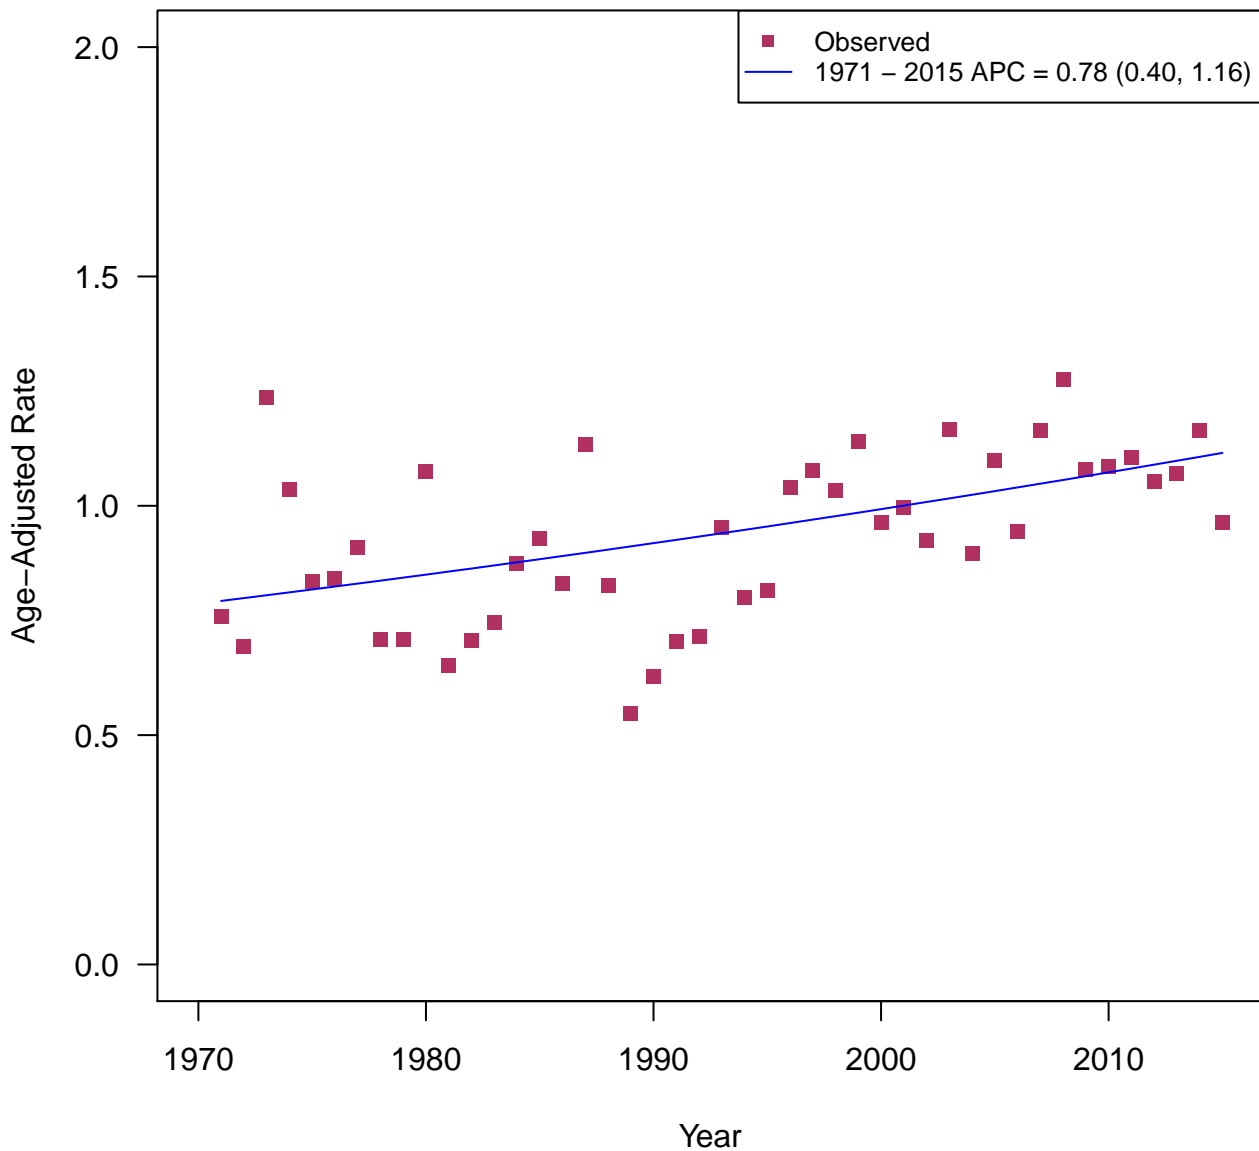

**Figure 141. Age-adjusted incidence rates of esophageal cancer in males aged 30–39 years in Canada, 1971–2015**

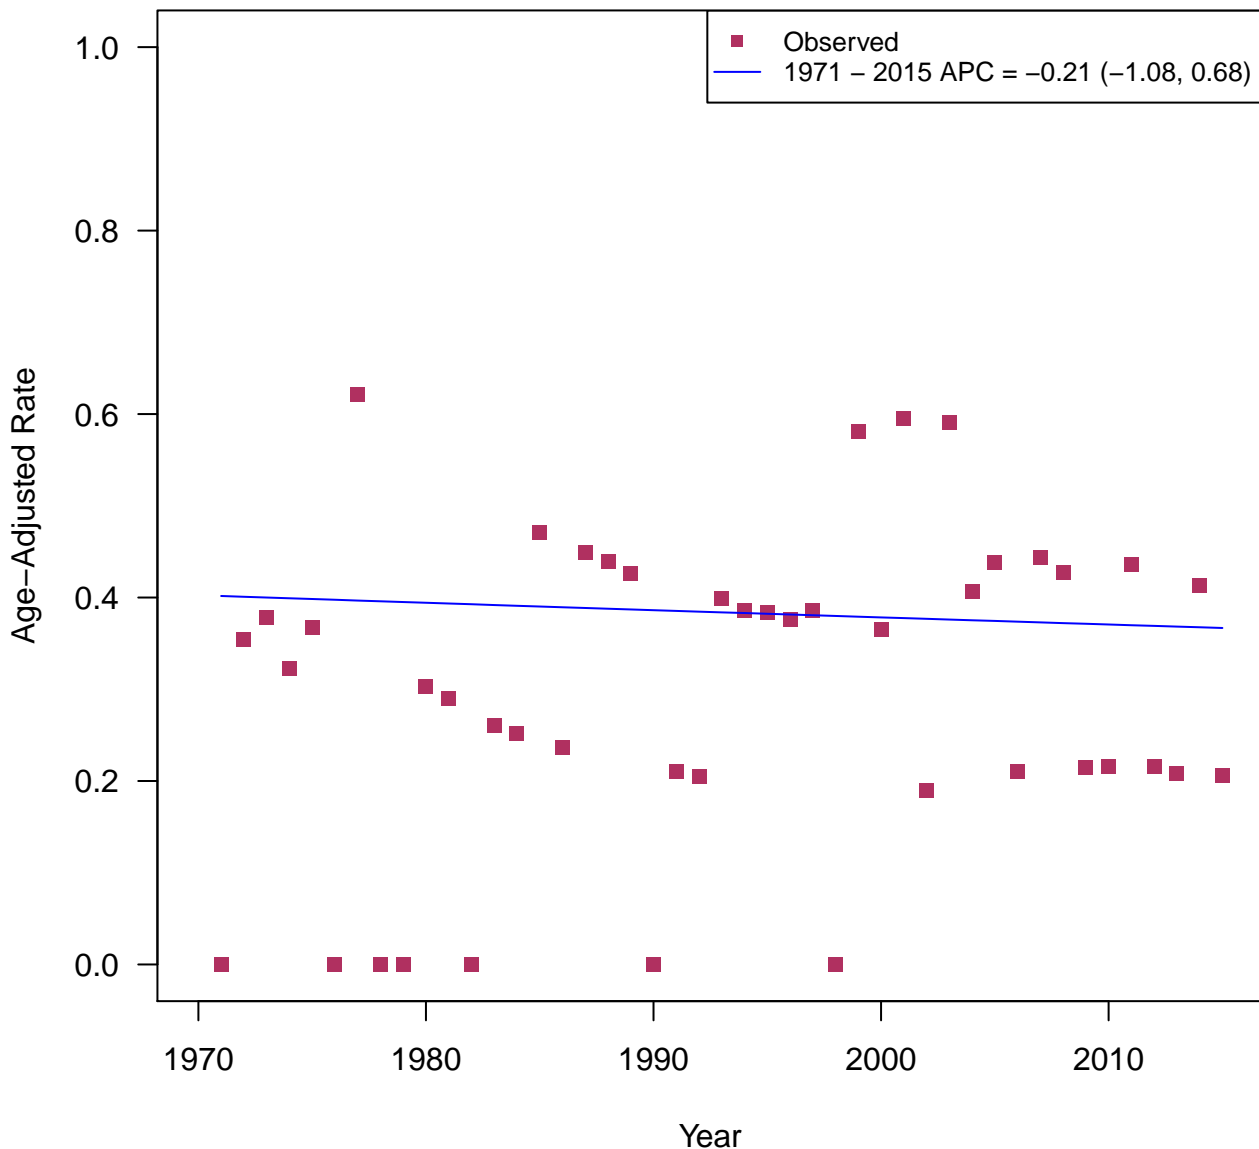

**Figure 142. Age-adjusted incidence rates of esophageal cancer in males aged 40–49 years in Canada, 1971–2015**

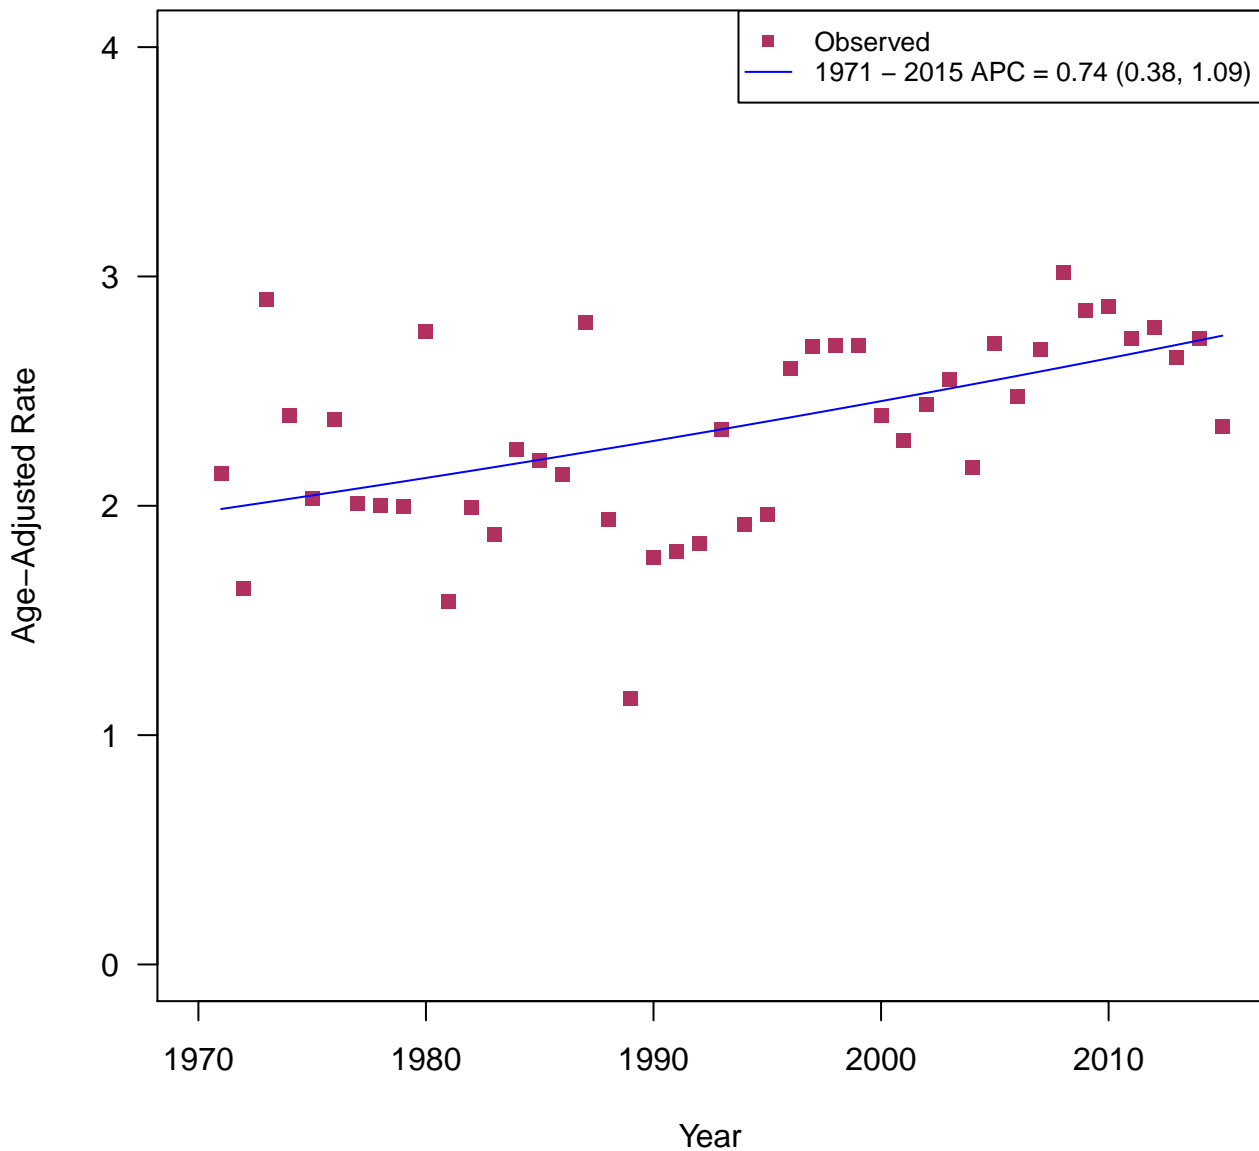

**Figure 143. Age-adjusted incidence rates of esophageal cancer in males aged 50–59 years in Canada, 1971–2015**

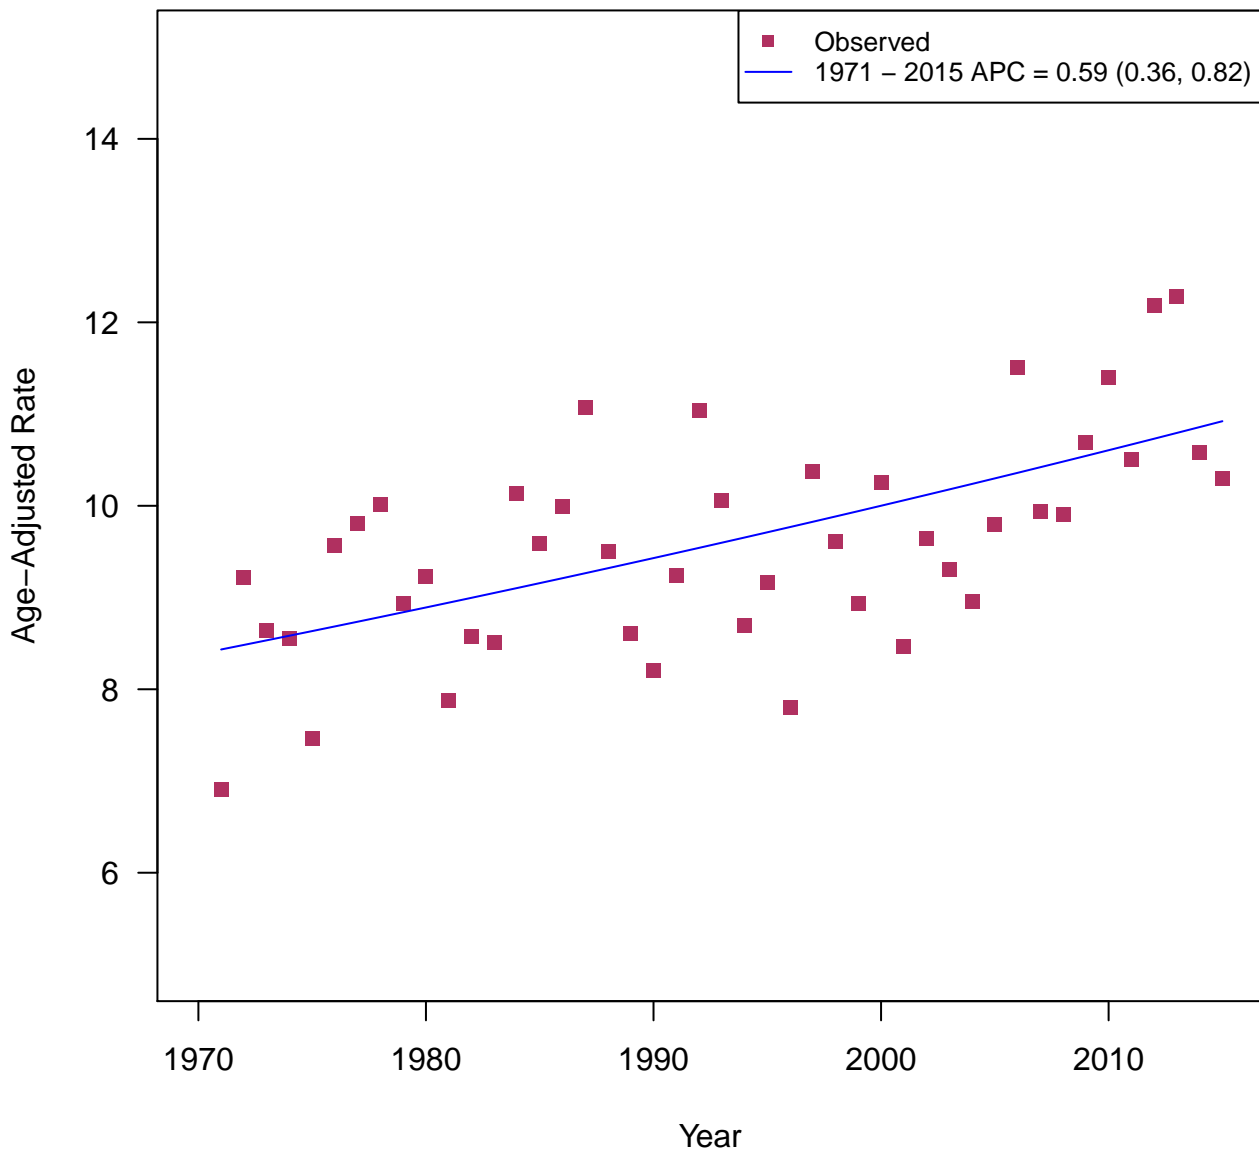

**Figure 144. Age-adjusted incidence rates of esophageal cancer in males aged 60–69 years in Canada, 1971–2015**

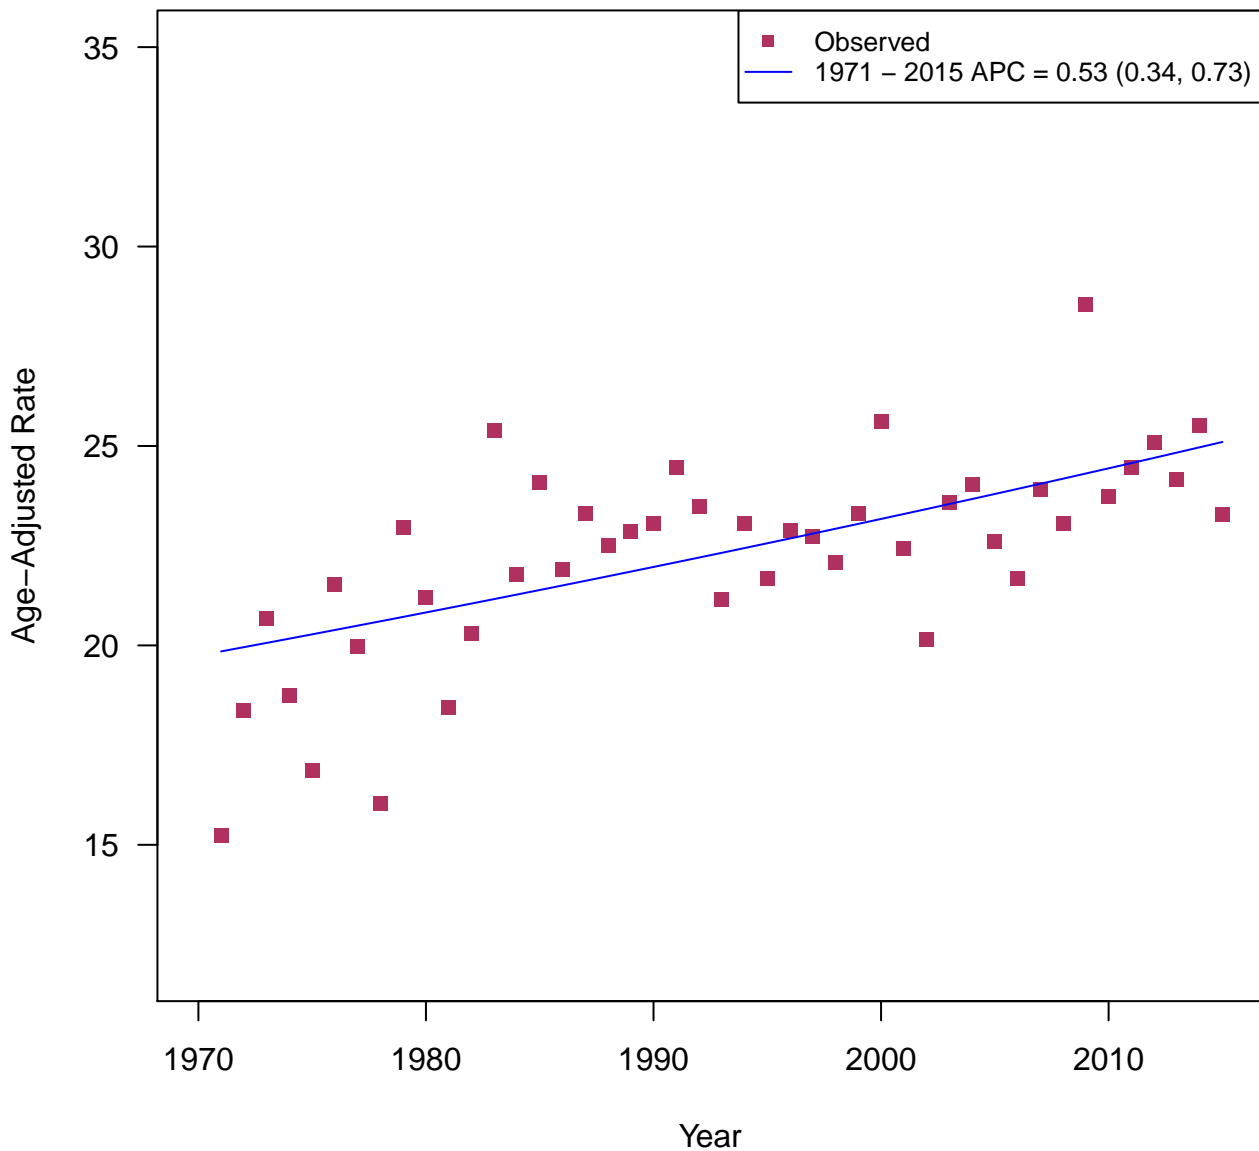

**Figure 145. Age-adjusted incidence rates of esophageal cancer in males aged 70–79 years in Canada, 1971–2015**

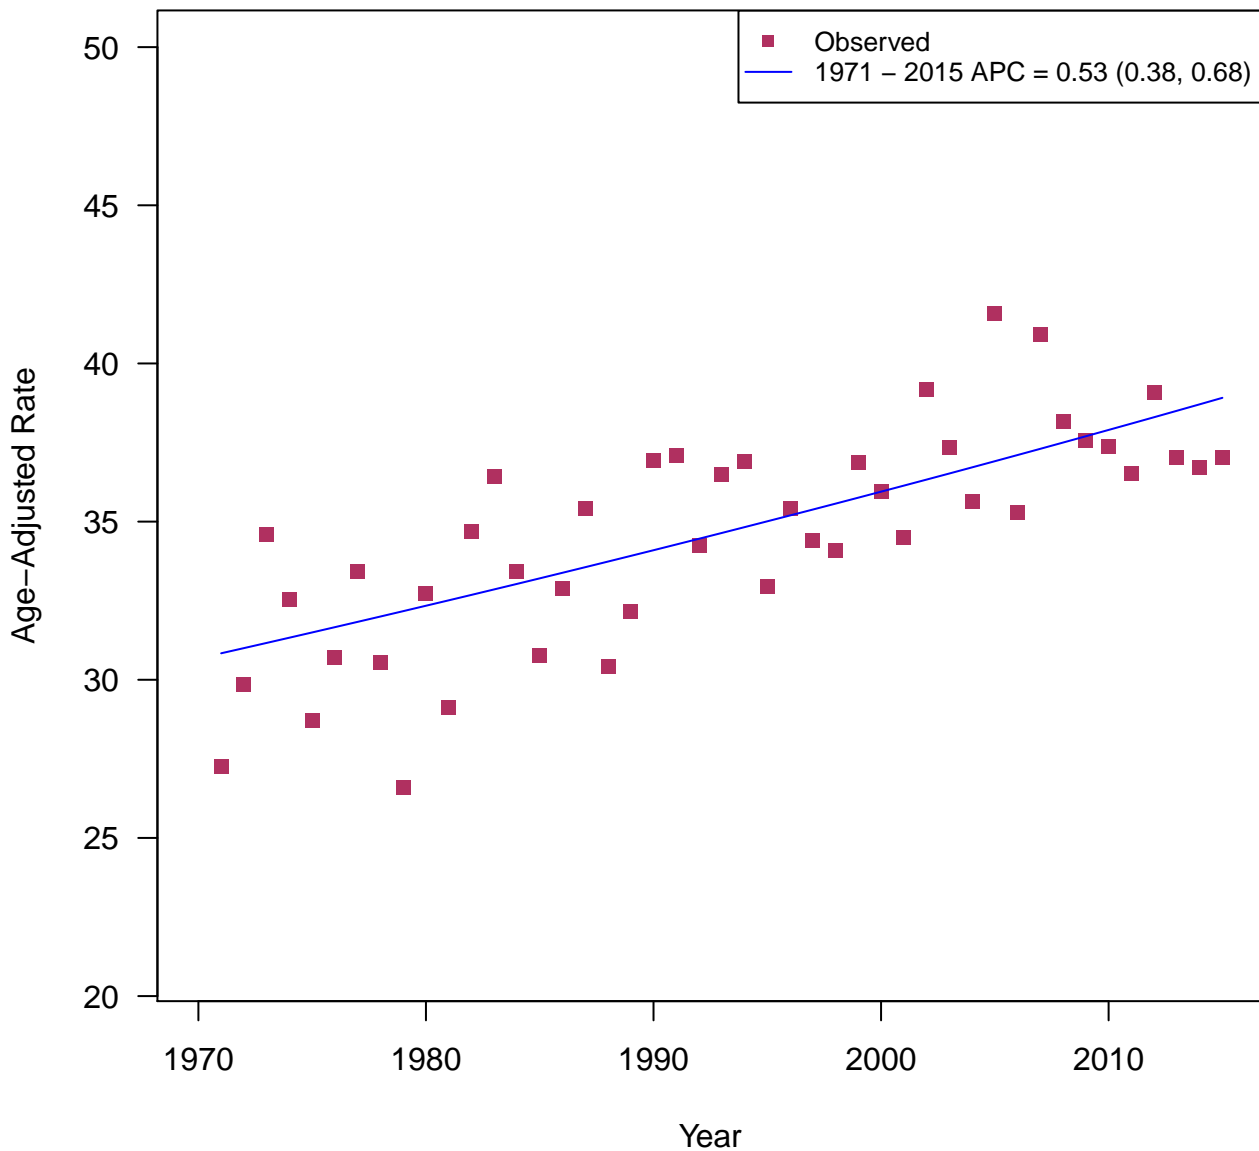

**Figure 146. Age-adjusted incidence rates of esophageal cancer in males aged 80–89 years in Canada, 1971–2015**

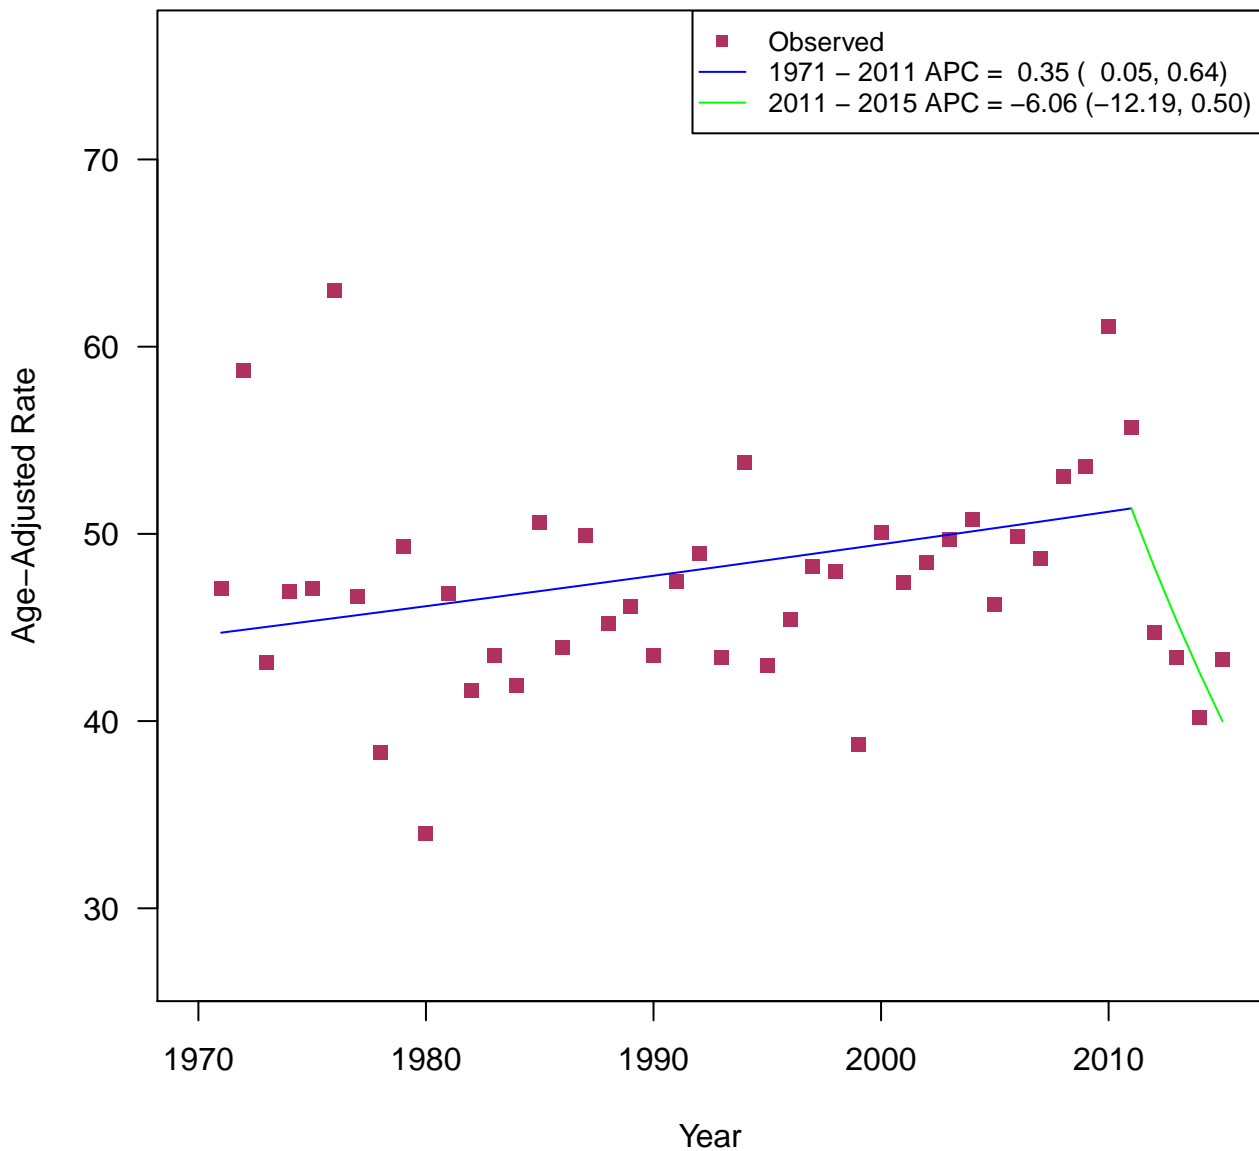

**Figure 147. Age-adjusted incidence rates of esophageal cancer in females aged 20–29 years in Canada, 1971–2015**

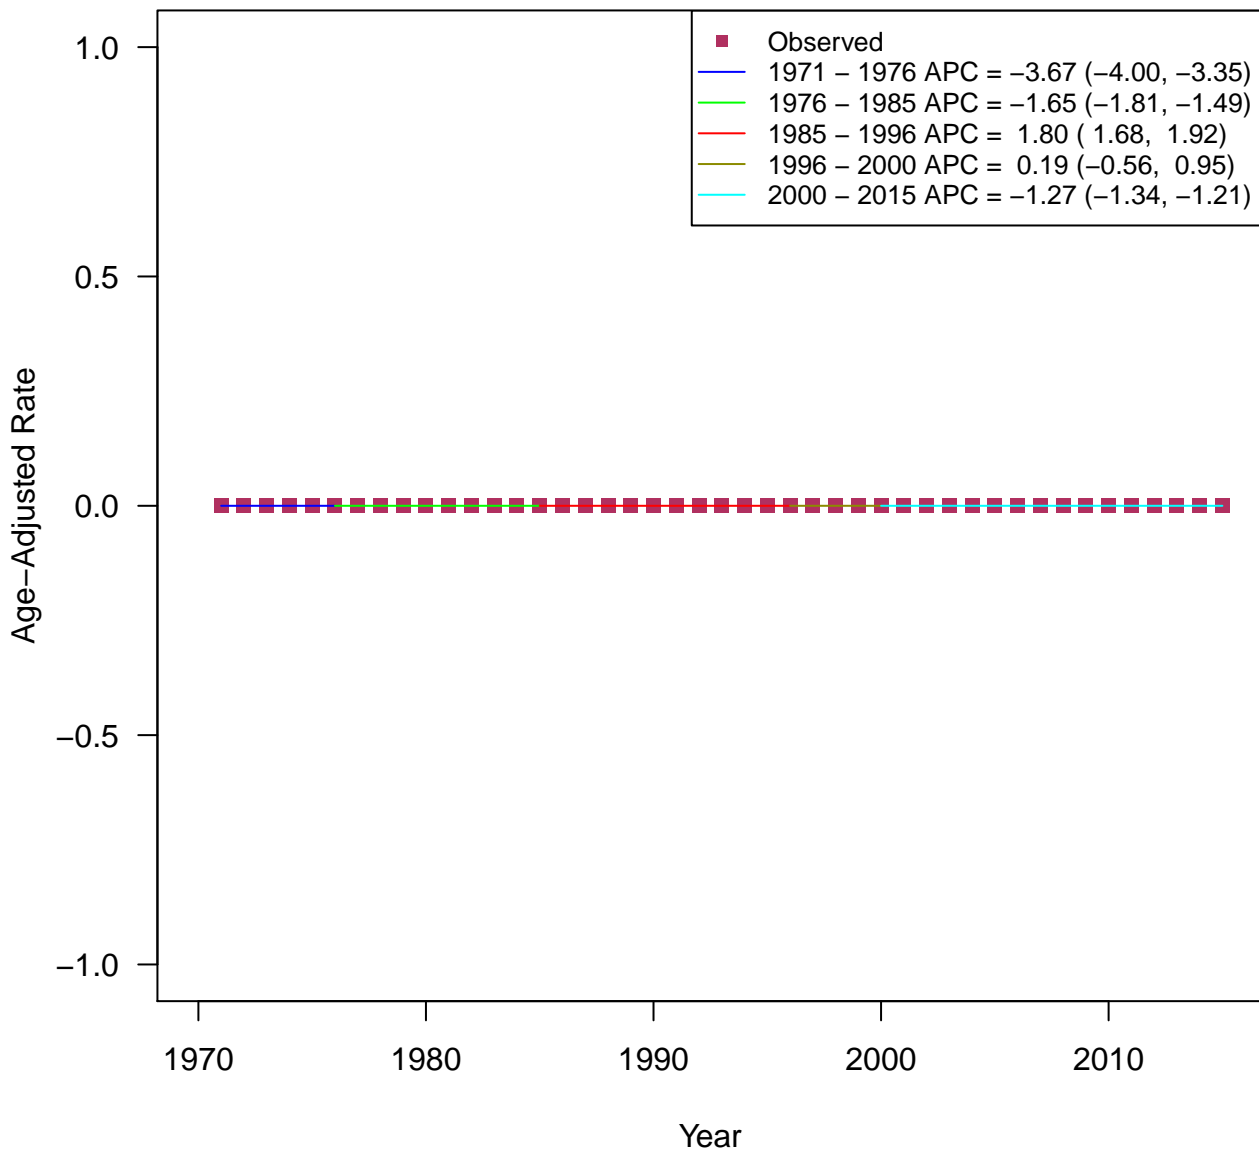



**Figure 148. Age-adjusted incidence rates of esophageal cancer in females aged 20–39 years in Canada, 1971–2015**

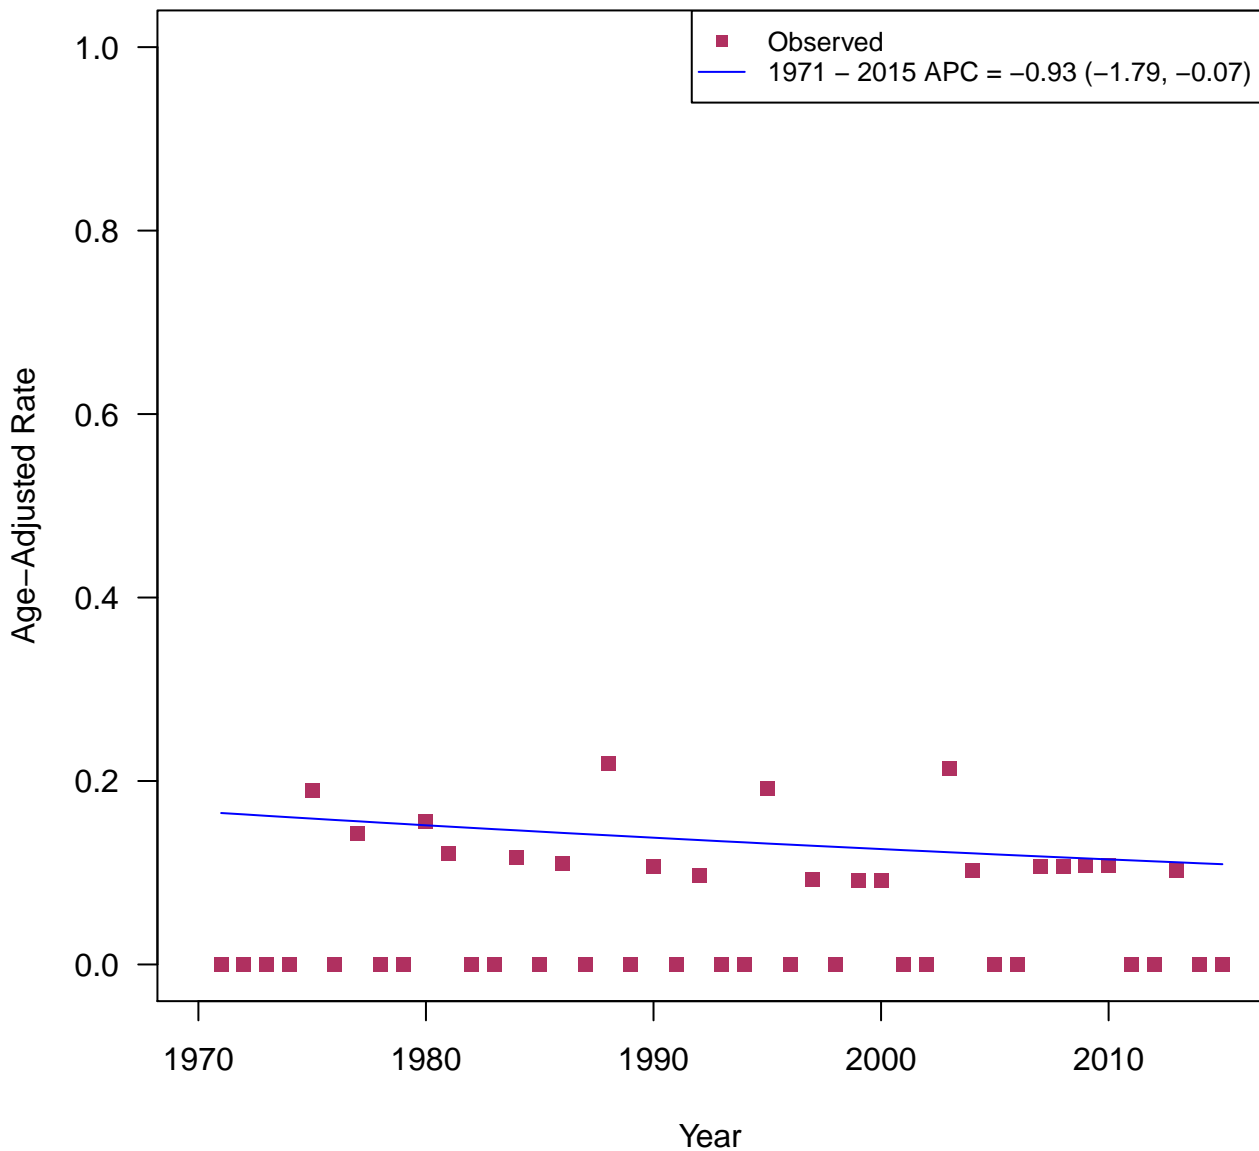

**Figure 149. Age-adjusted incidence rates of esophageal cancer in females aged 20–49 years in Canada, 1971–2015**

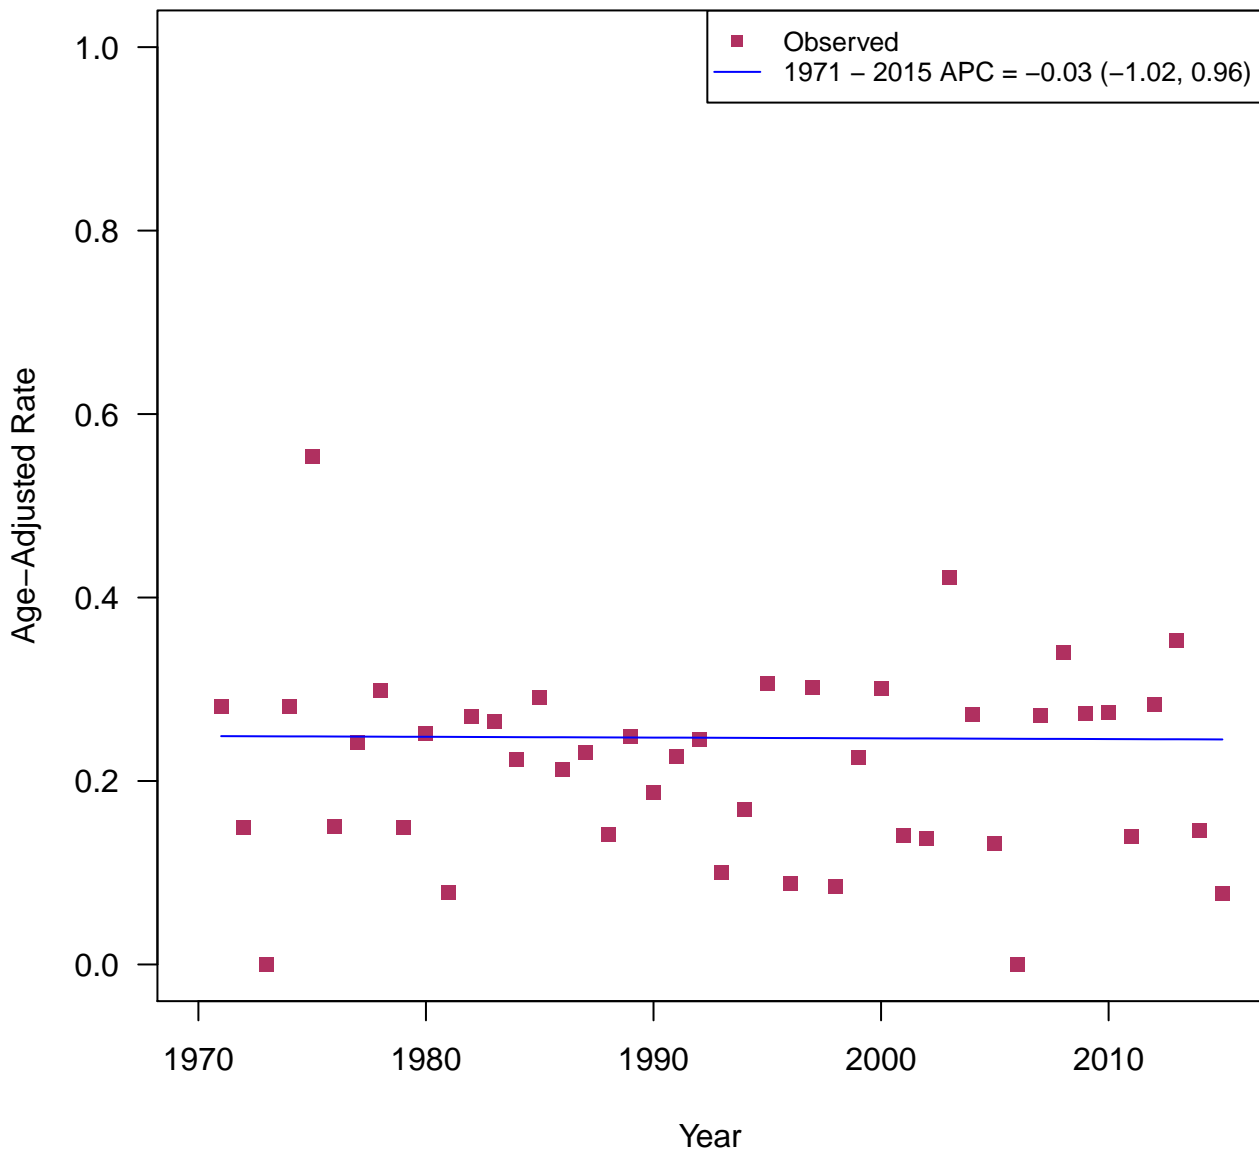

**Figure 150. Age-adjusted incidence rates of esophageal cancer in females aged 30–39 years in Canada, 1971–2015**

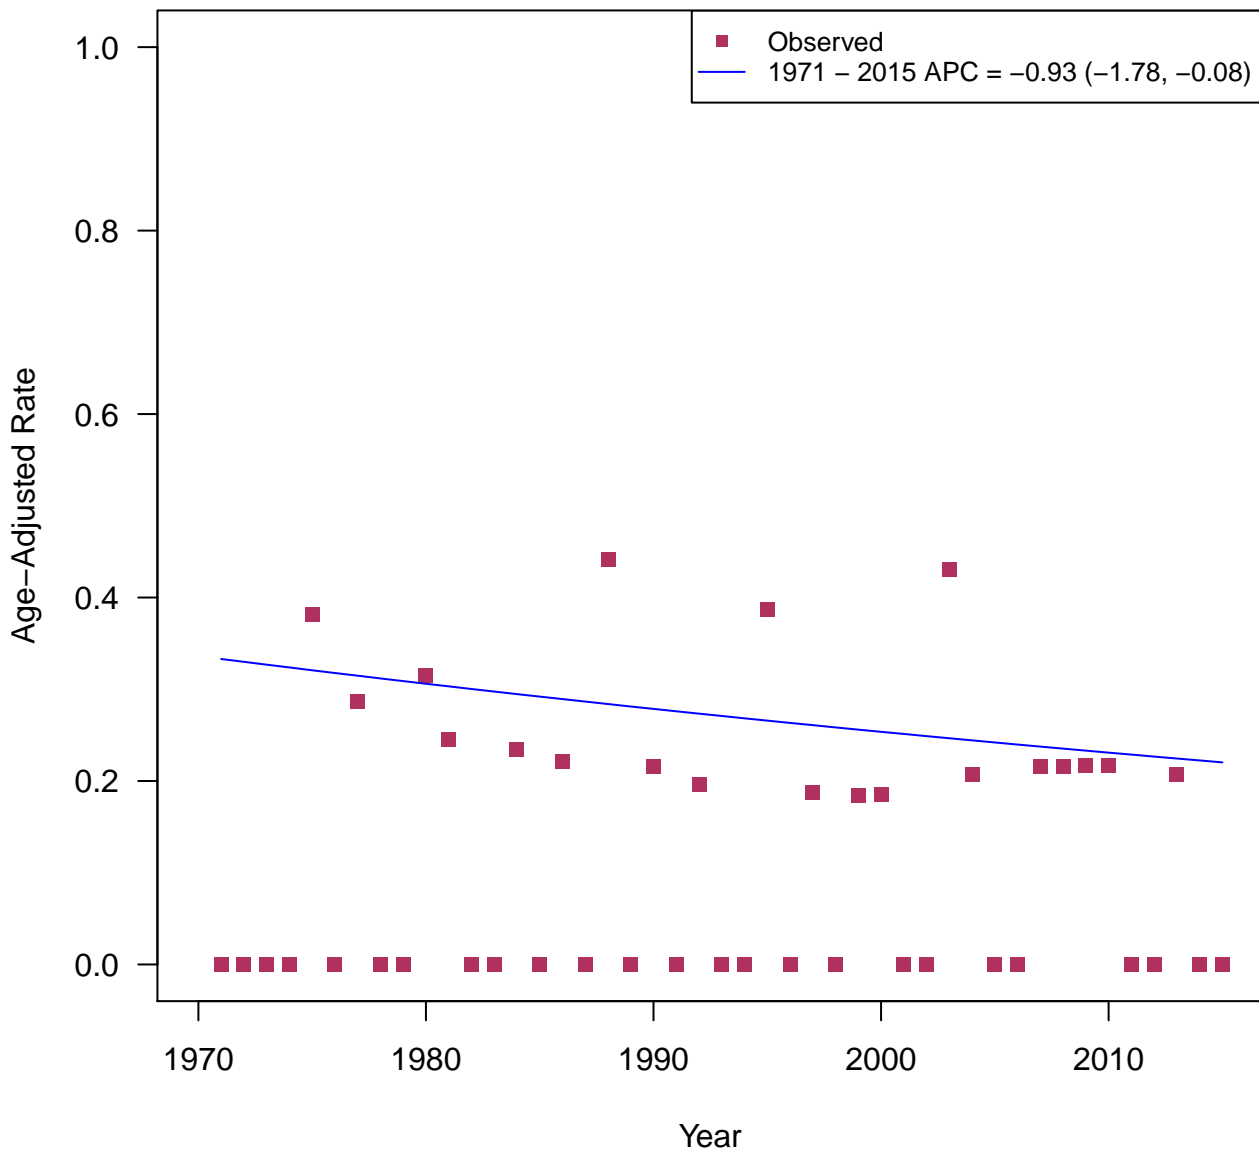

**Figure 151. Age-adjusted incidence rates of esophageal cancer in females aged 40–49 years in Canada, 1971–2015**

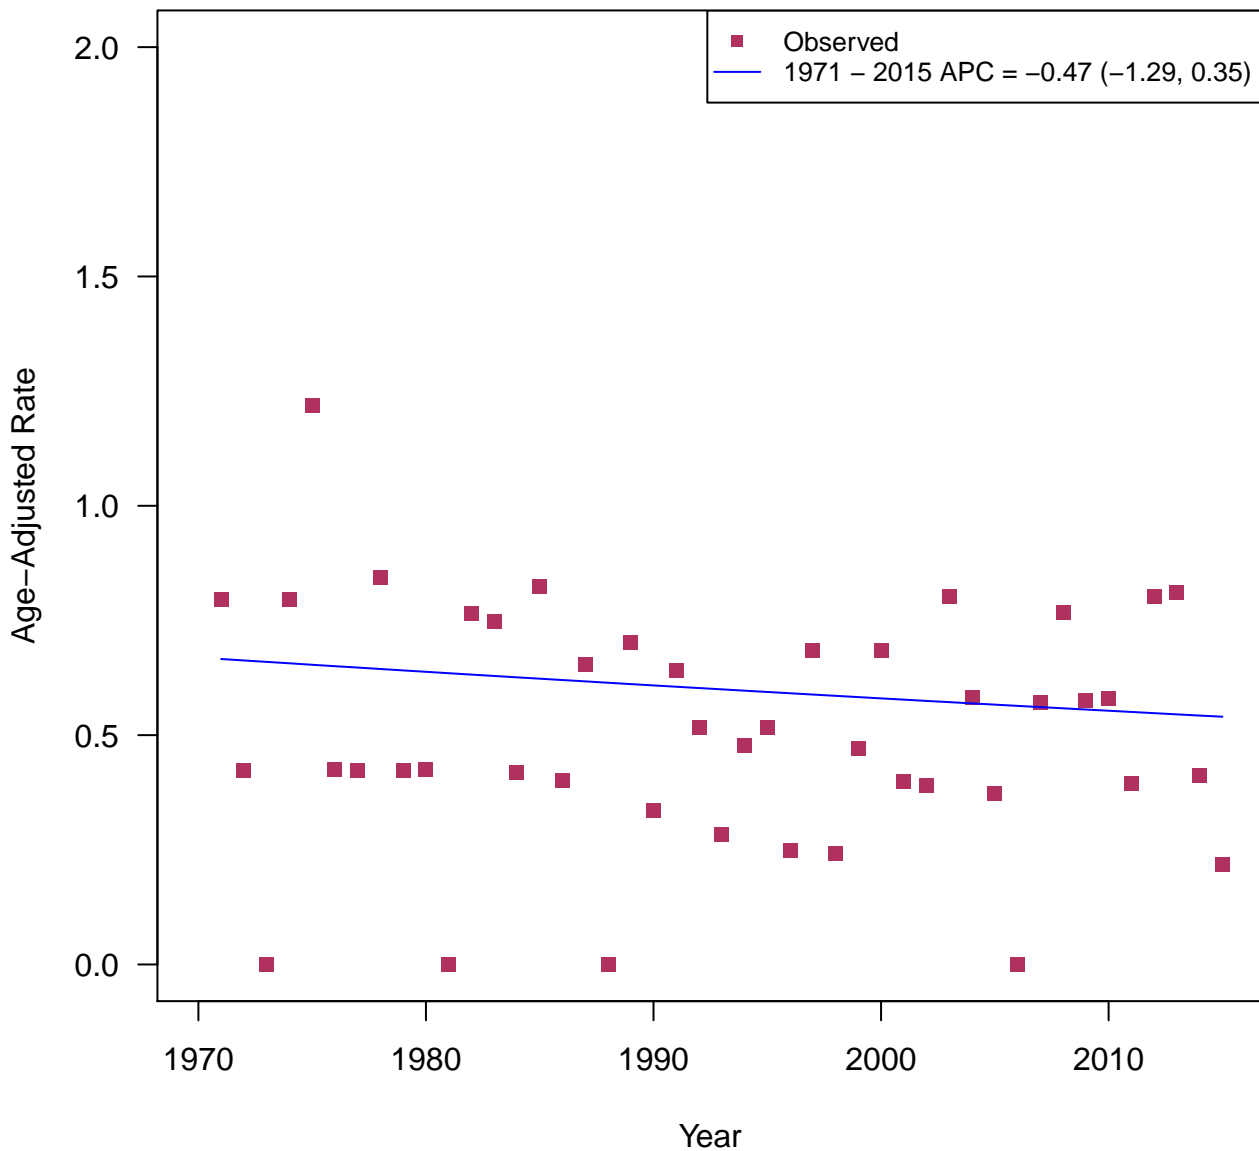

**Figure 152. Age-adjusted incidence rates of esophageal cancer in females aged 50–59 years in Canada, 1971–2015**

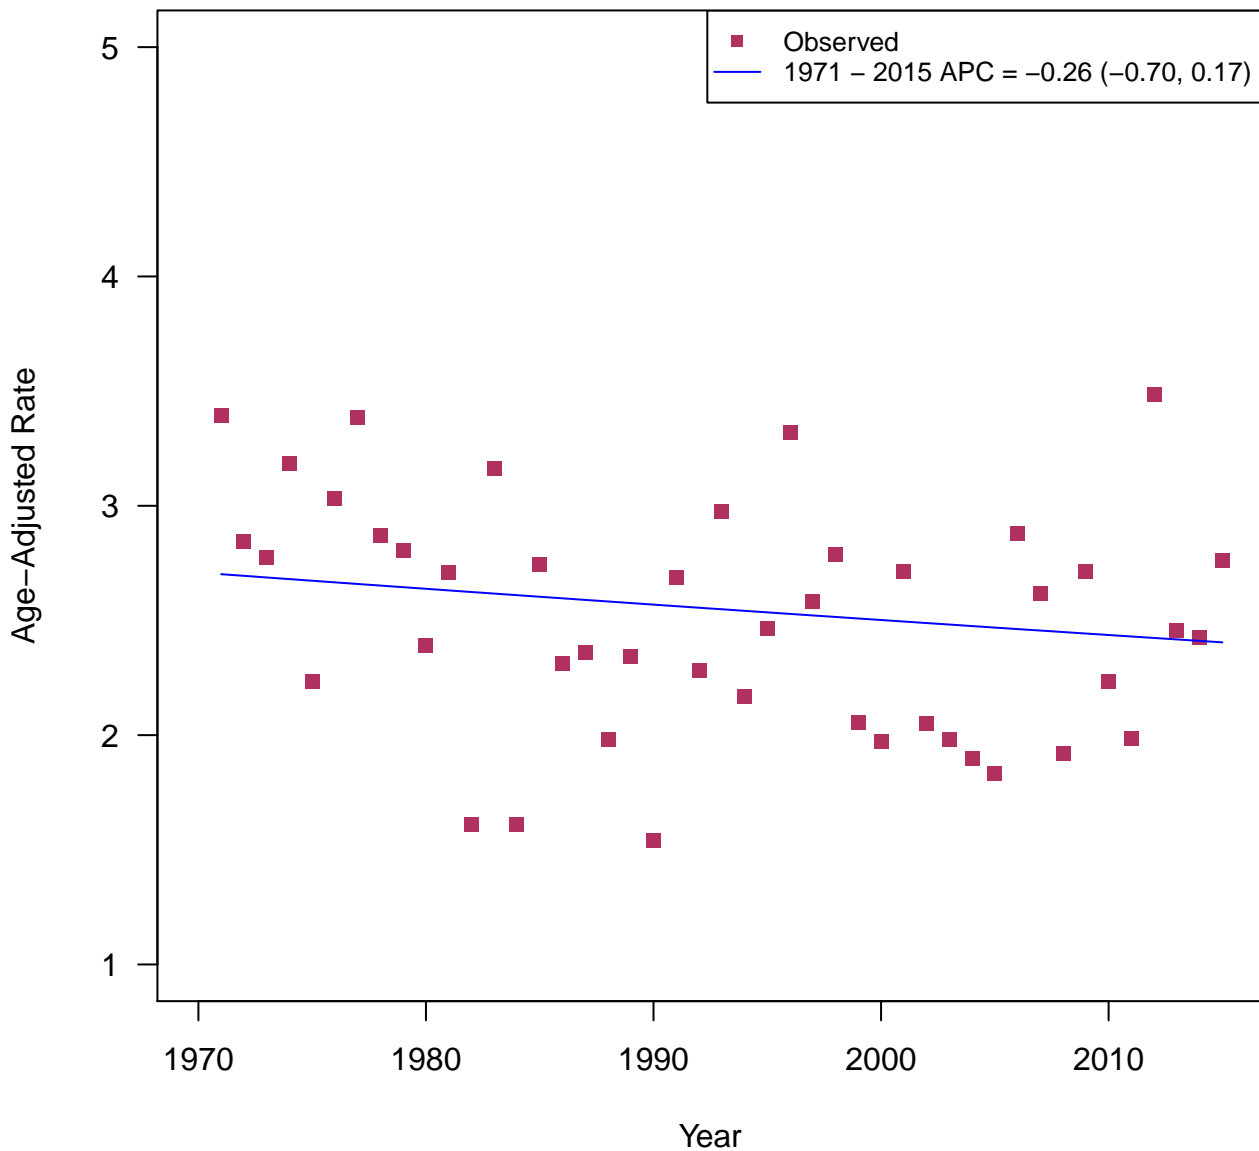

**Figure 153. Age-adjusted incidence rates of esophageal cancer in females aged 60–69 years in Canada, 1971–2015**

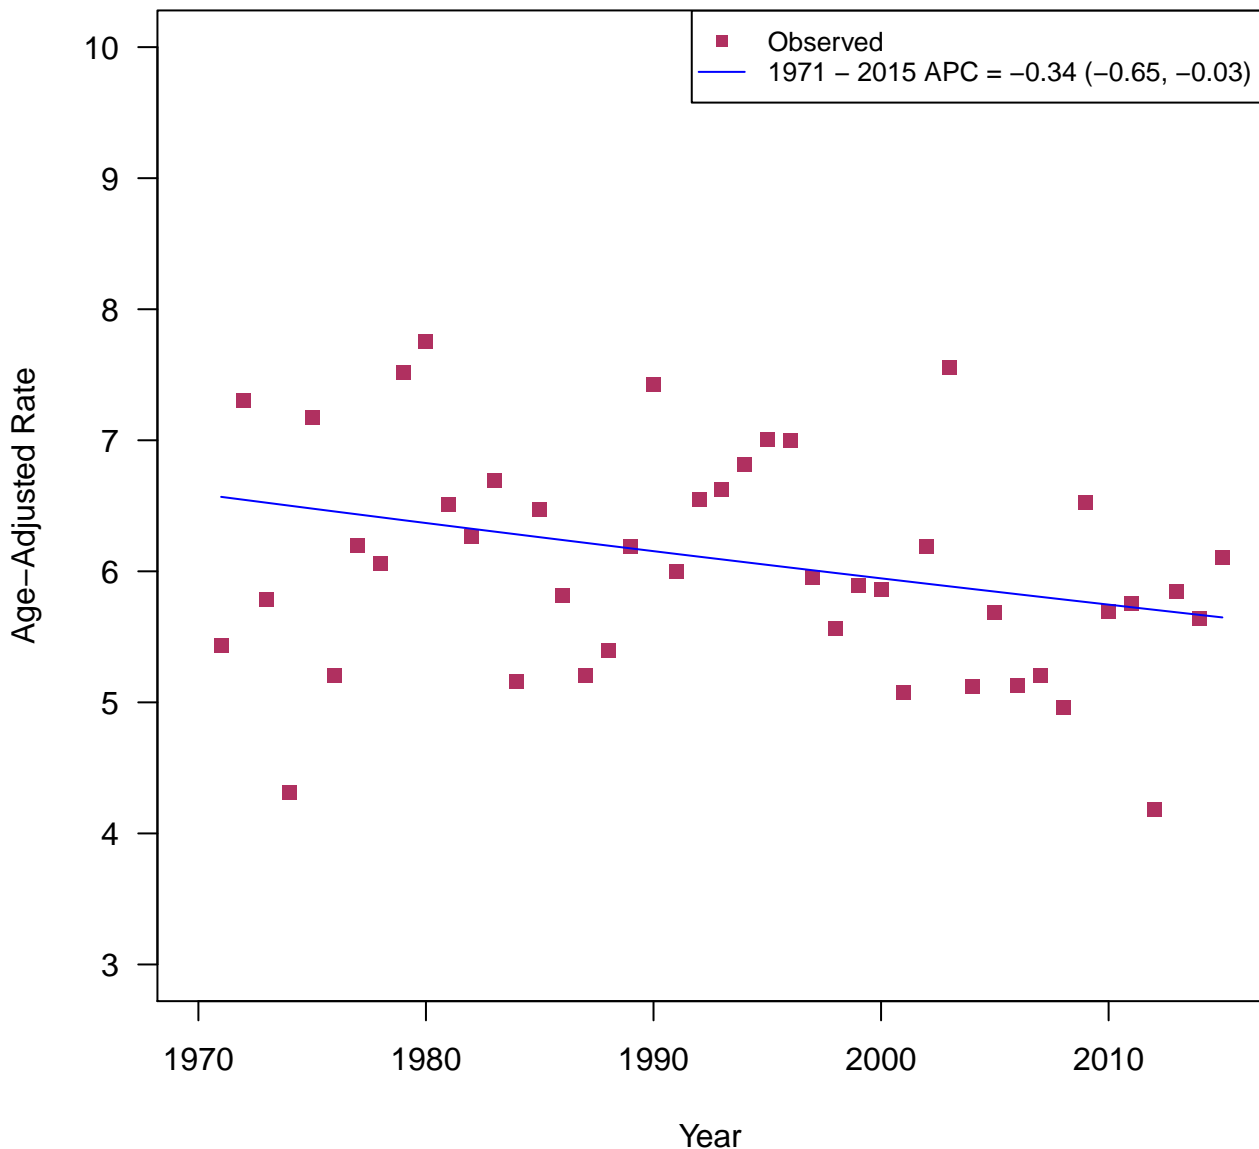

**Figure 154. Age-adjusted incidence rates of esophageal cancer in females aged 70–79 years in Canada, 1971–2015**

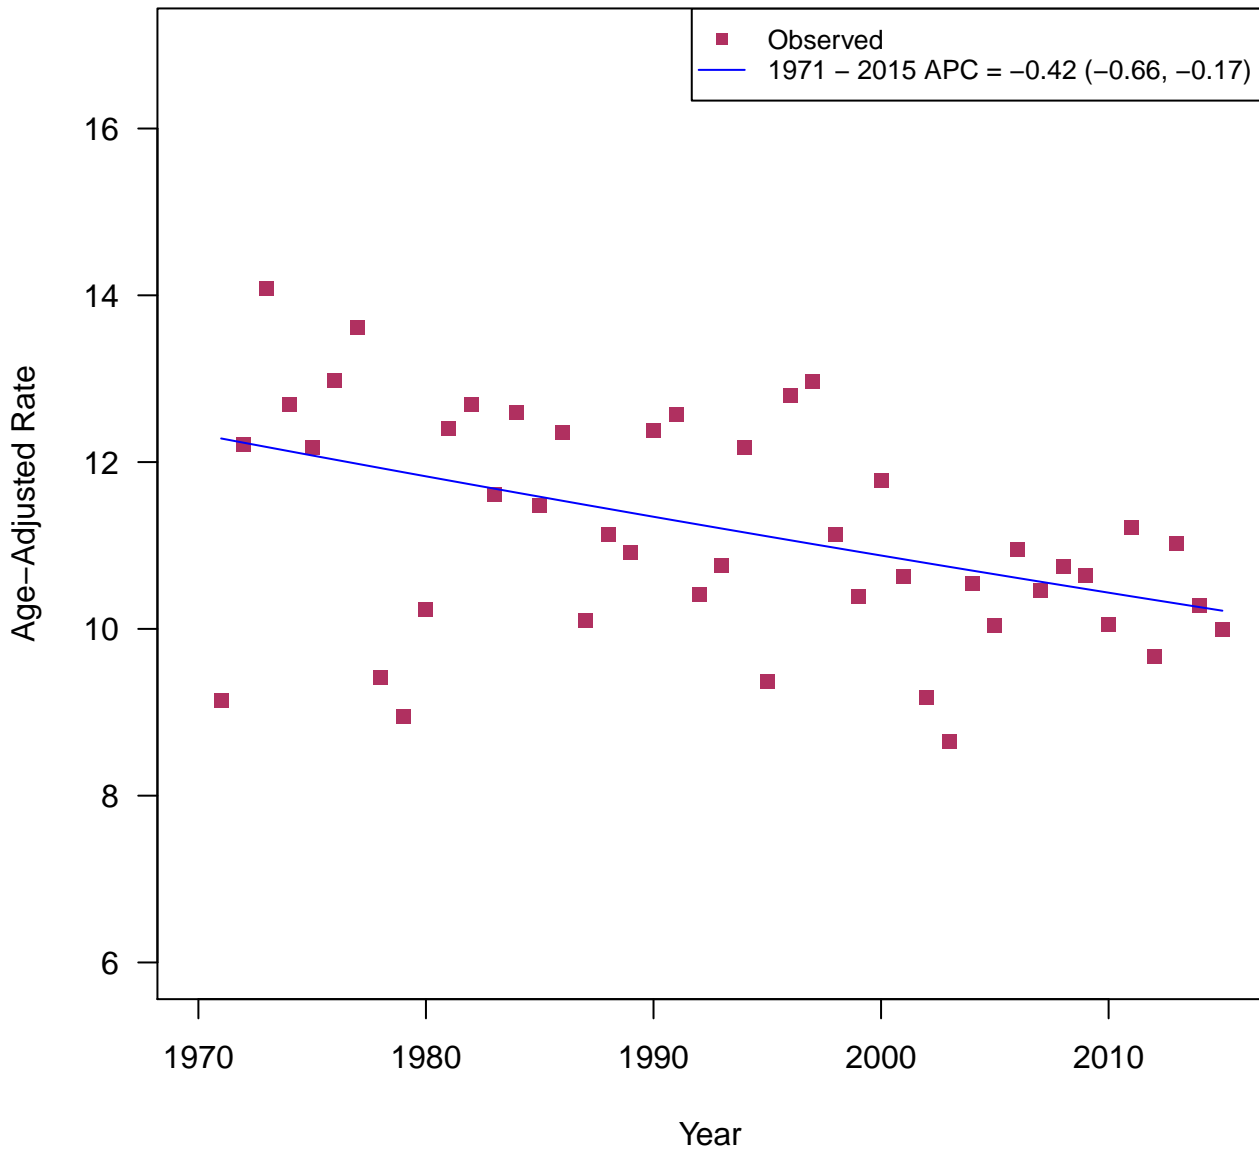

**Figure 155. Age-adjusted incidence rates of esophageal cancer in females aged 80–89 years in Canada, 1971–2015**

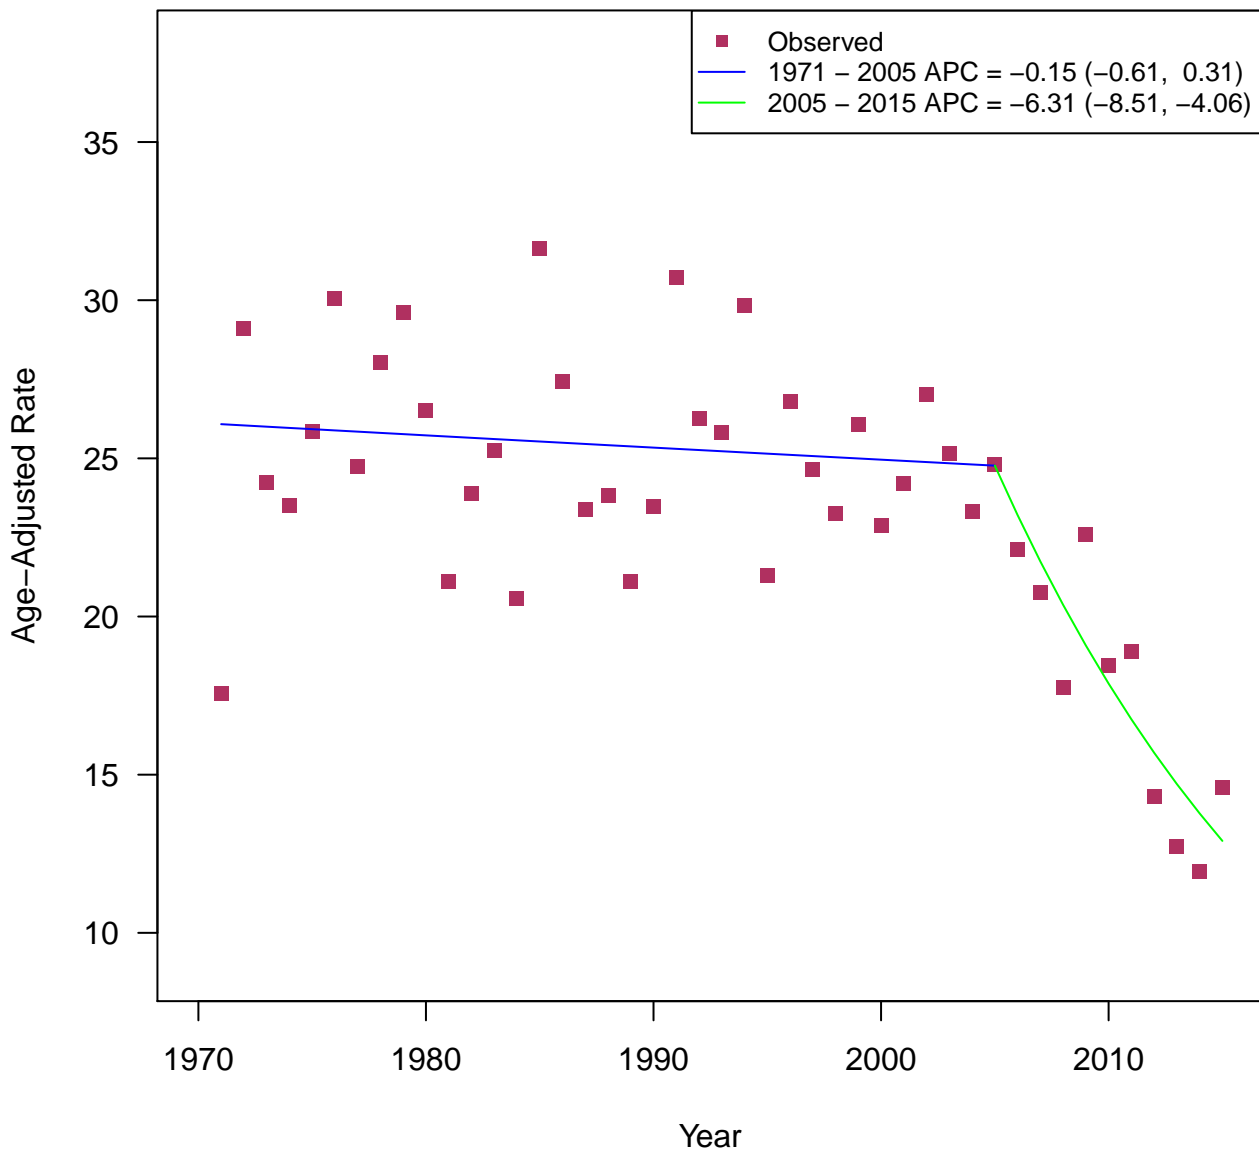



**Figure 156. Age-adjusted incidence rates of gallbladder cancer in males aged 20–29 years in Canada, 1971–2015**

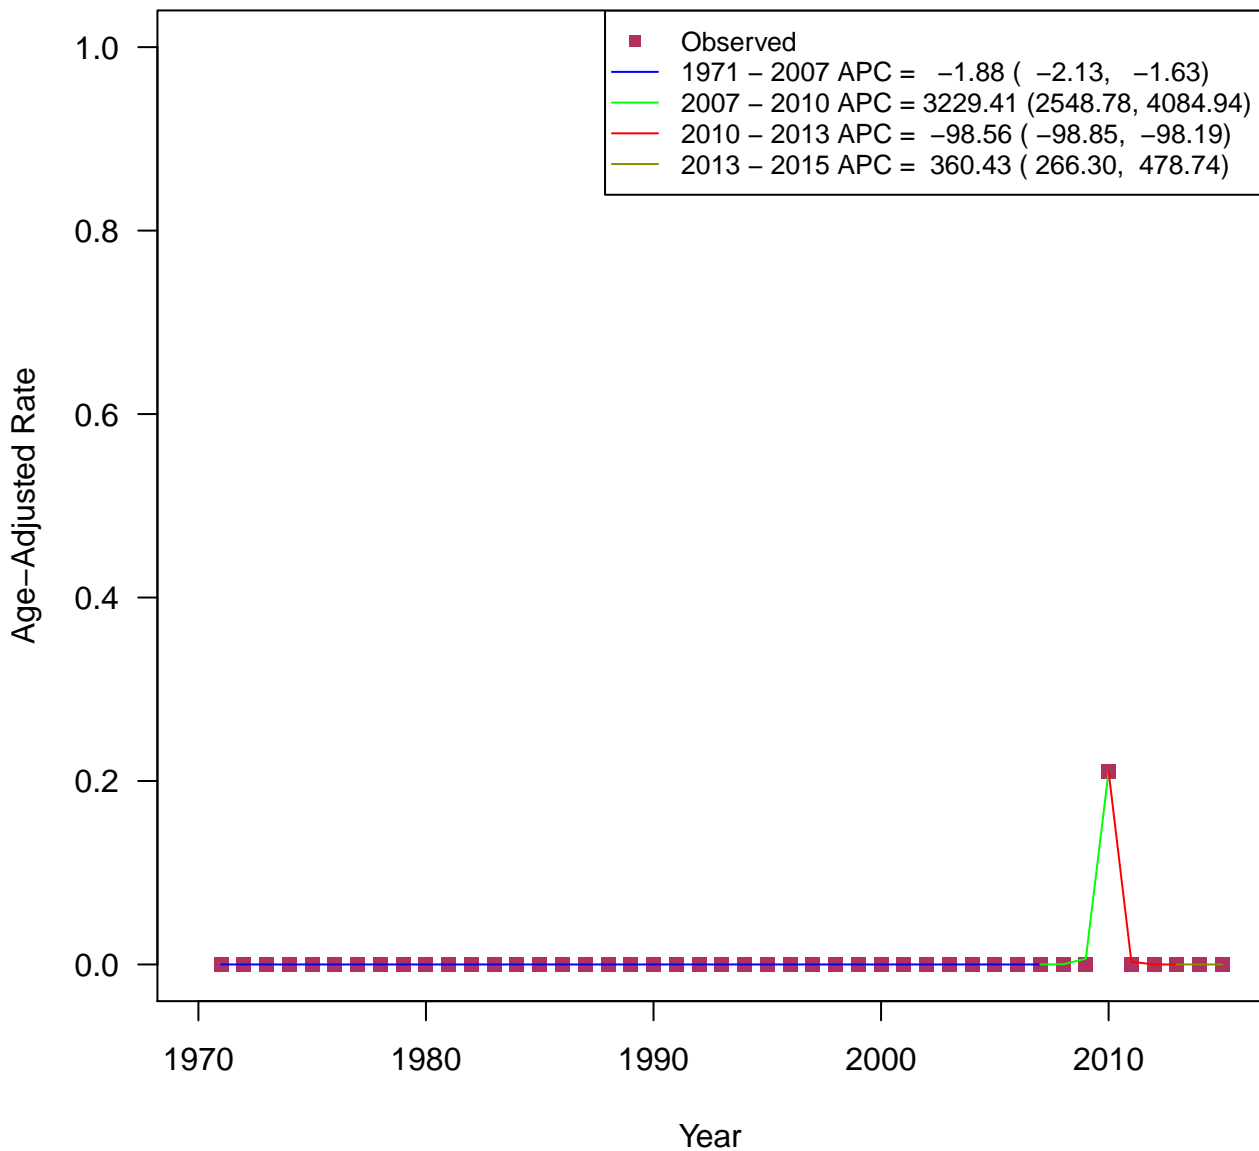

**Figure 157. Age-adjusted incidence rates of gallbladder cancer in males aged 20–39 years in Canada, 1971–2015**

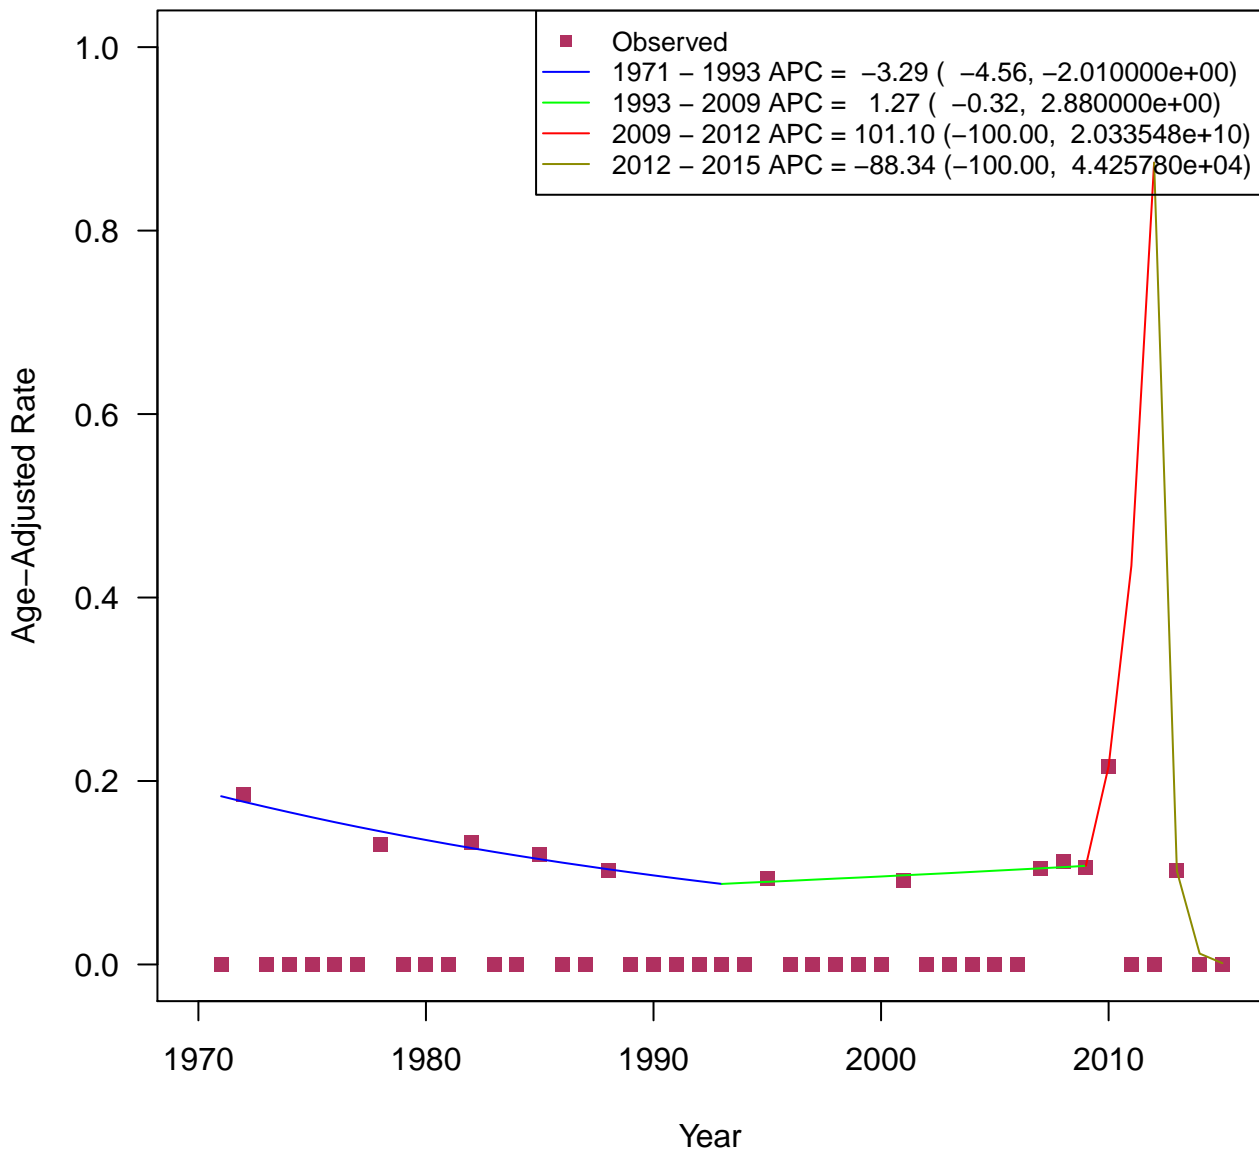

**Figure 158. Age-adjusted incidence rates of gallbladder cancer in males aged 20–49 years in Canada, 1971–2015**

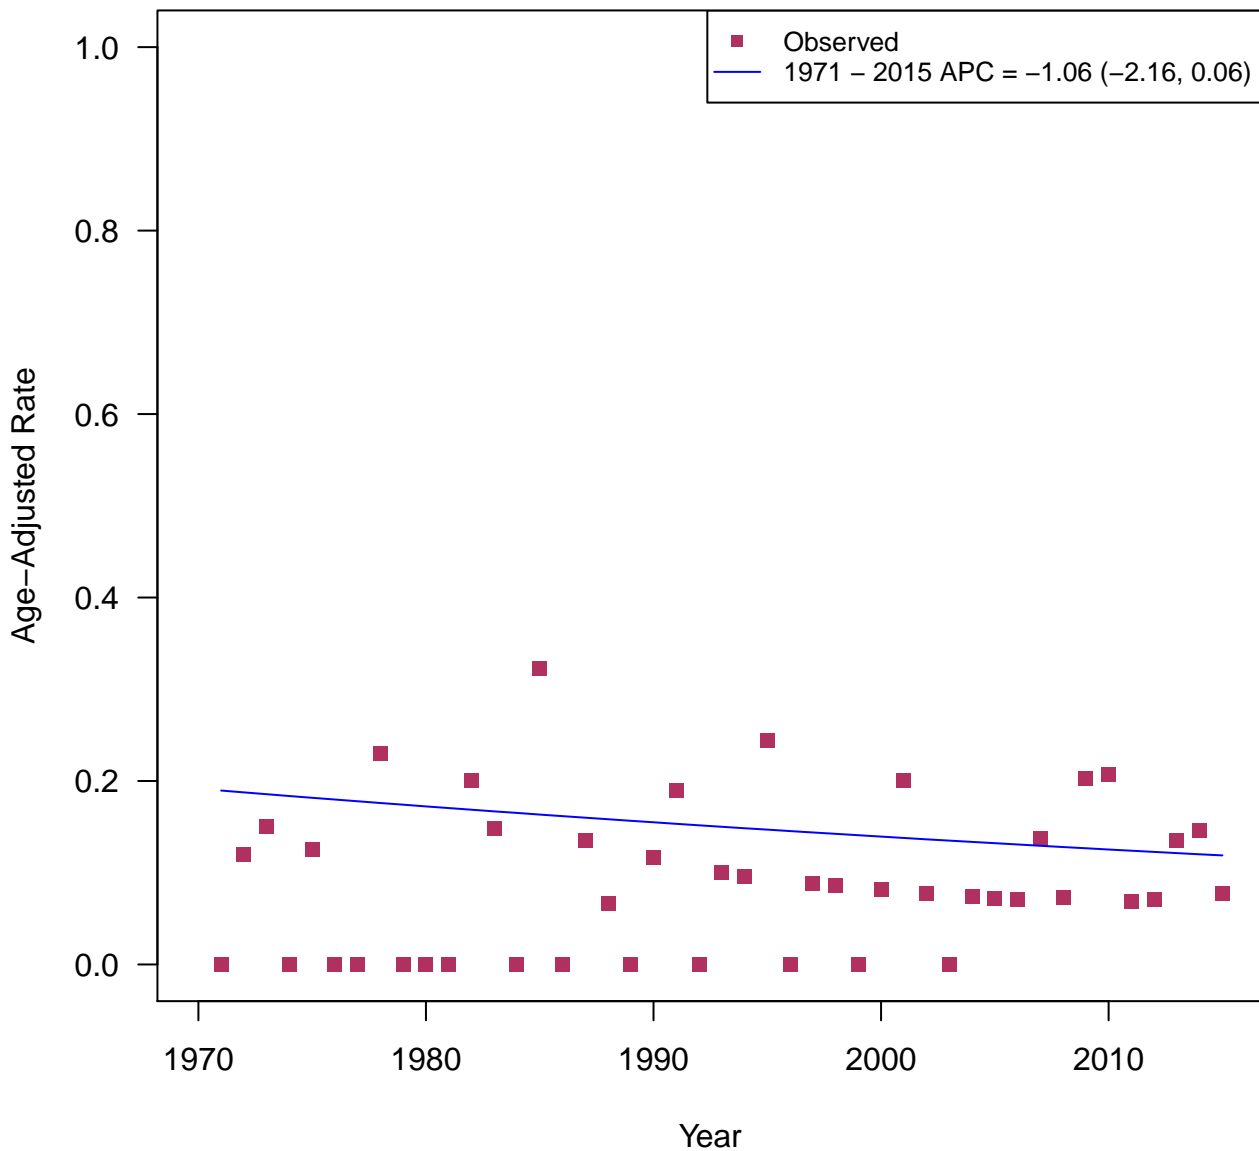

**Figure 159. Age-adjusted incidence rates of gallbladder cancer in males aged 30–39 years in Canada, 1971–2015**

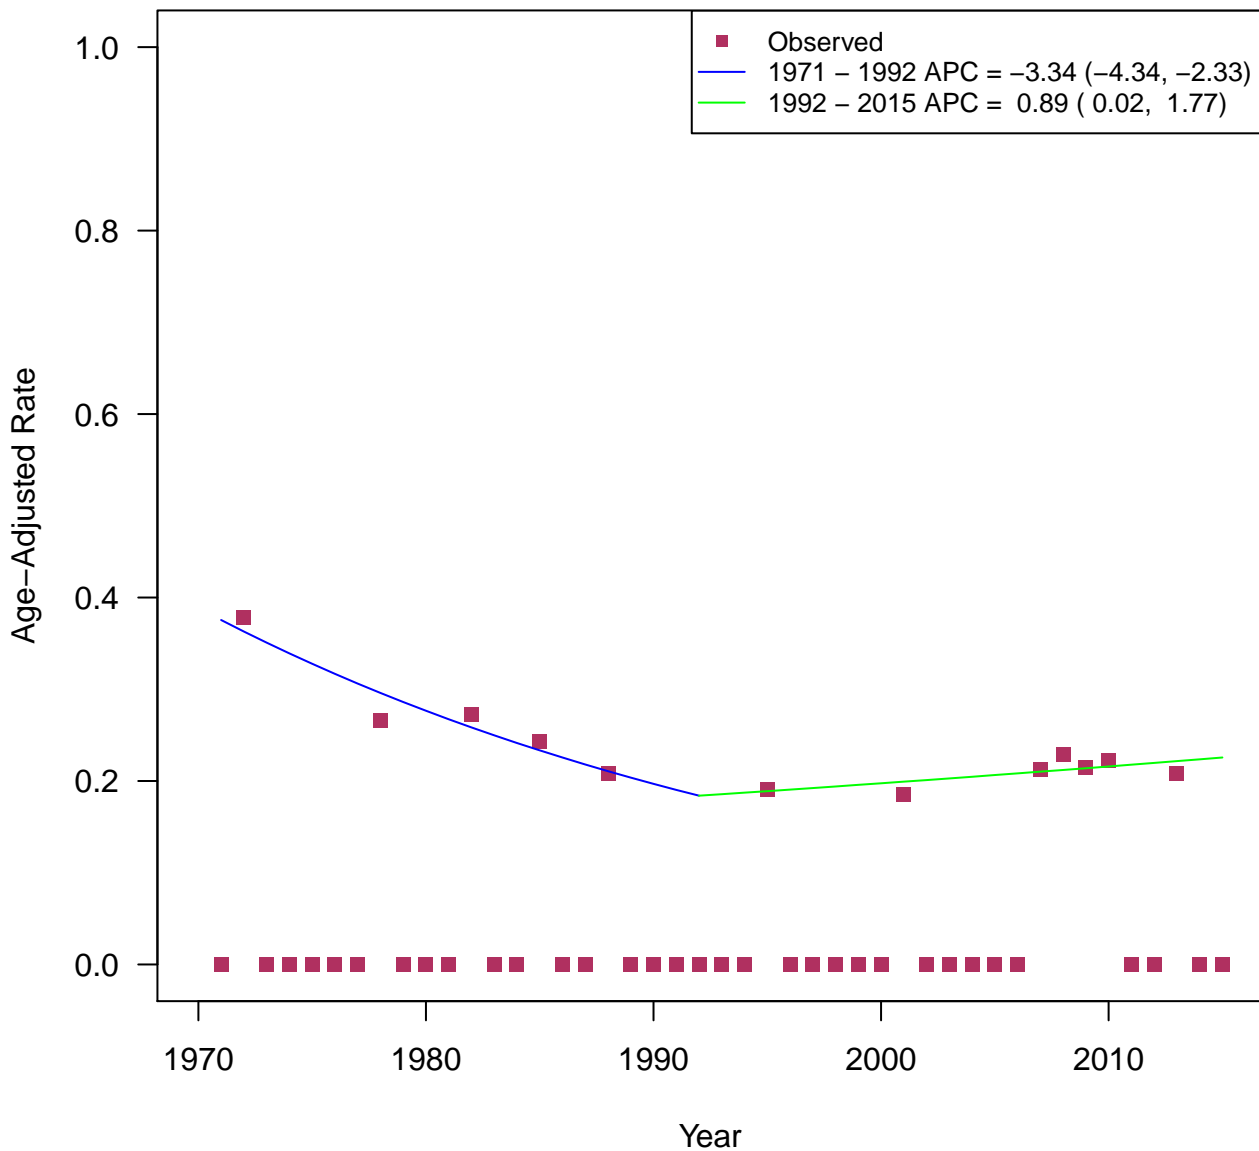

**Figure 160. Age-adjusted incidence rates of gallbladder cancer in males aged 40–49 years in Canada, 1971–2015**

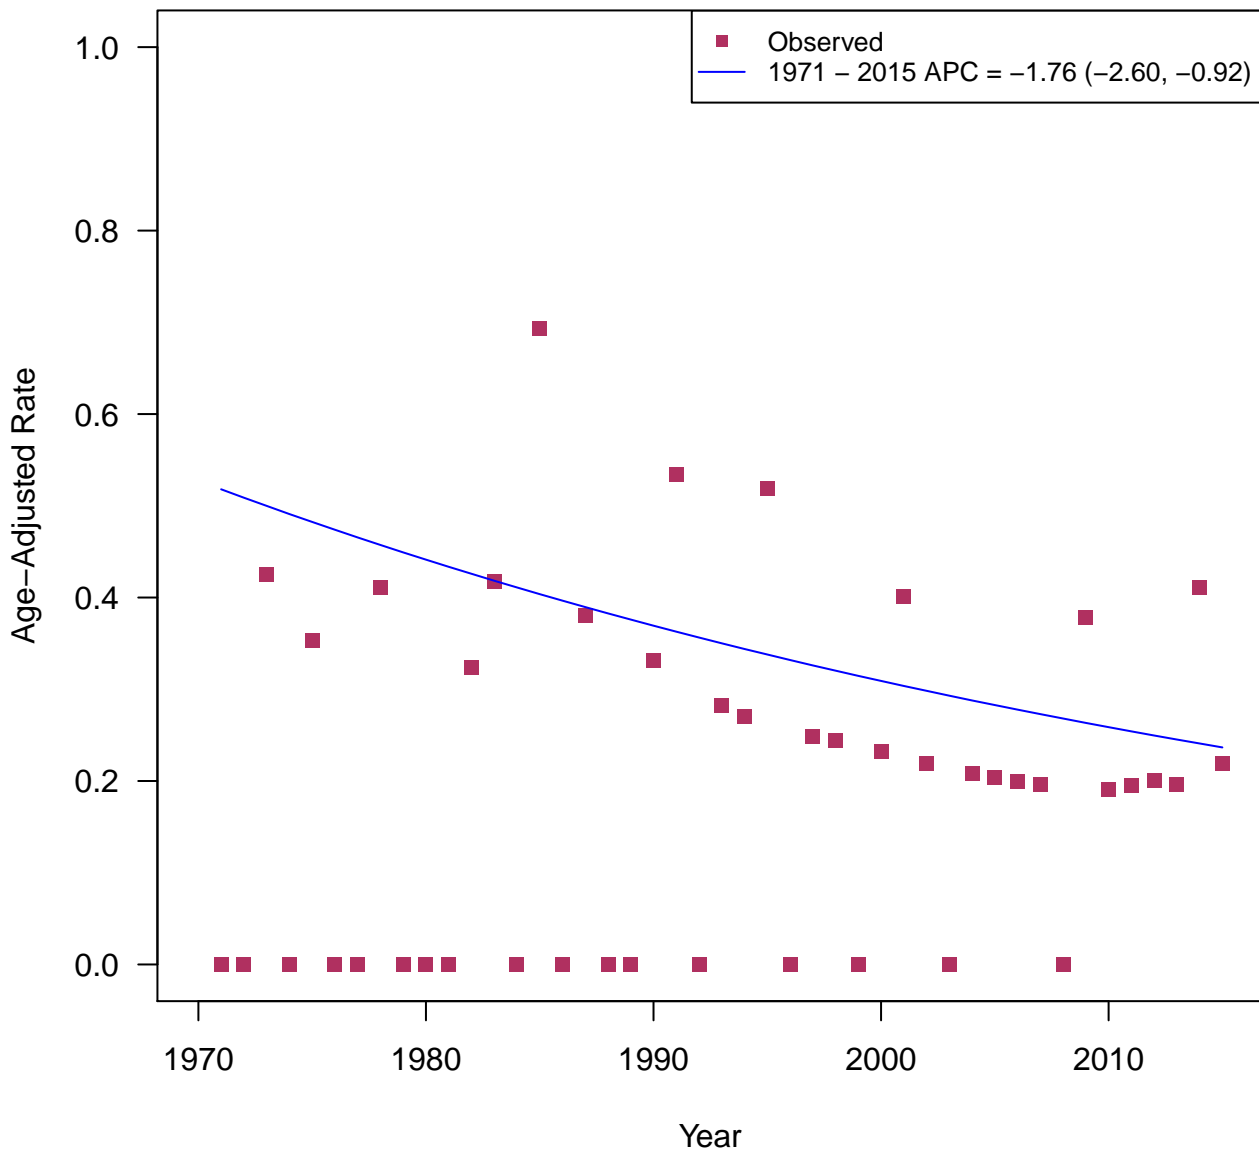

**Figure 161. Age-adjusted incidence rates of gallbladder cancer in males aged 50–59 years in Canada, 1971–2015**

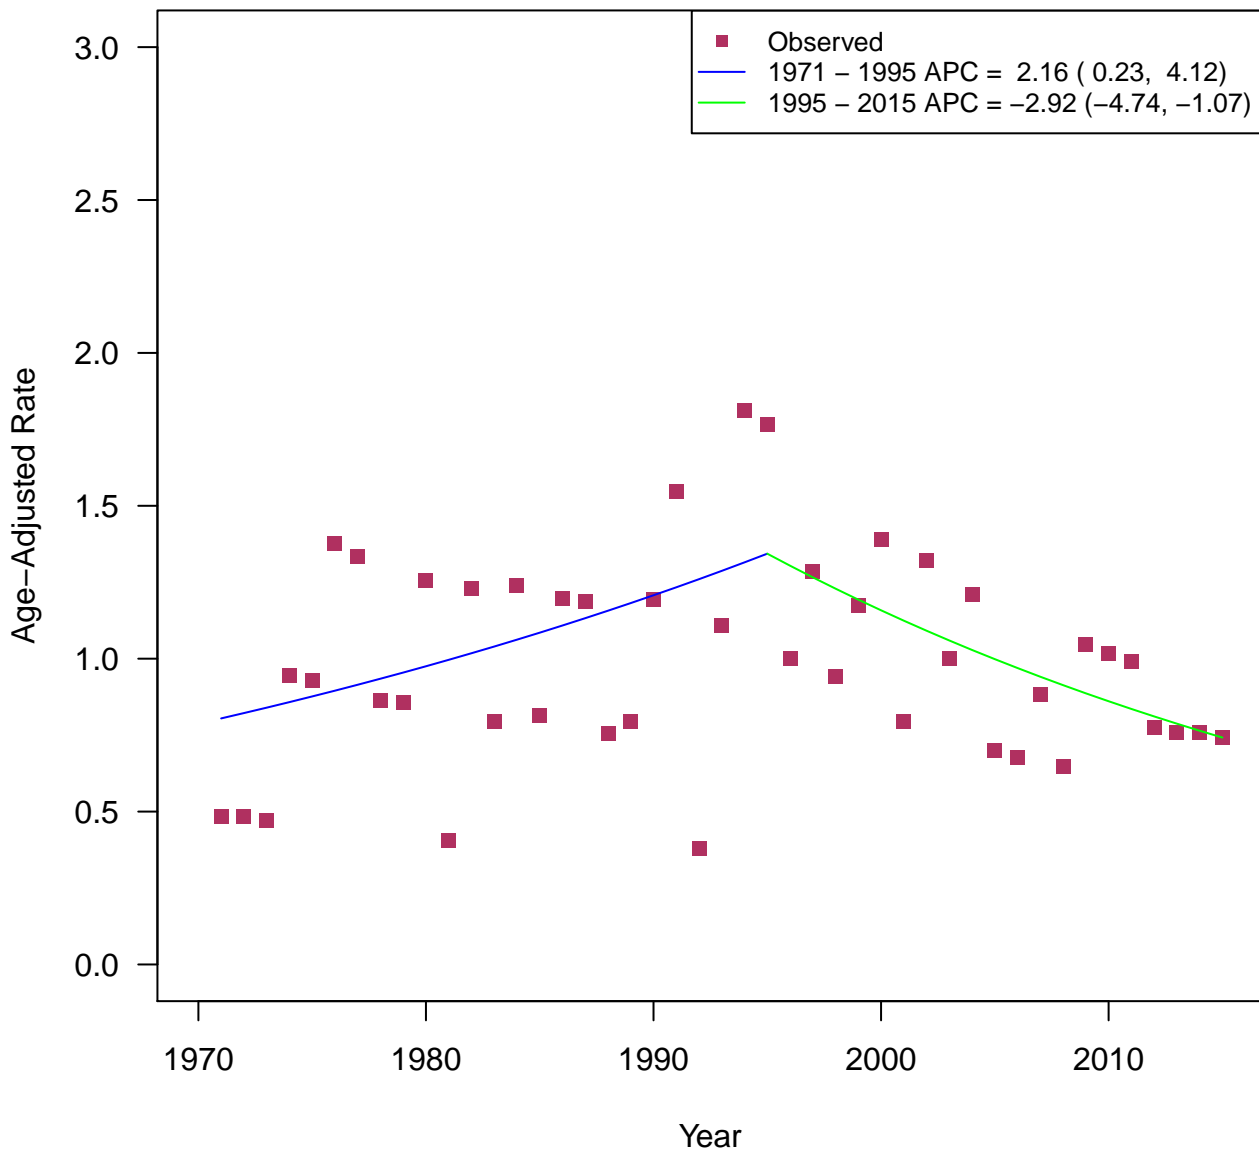

**Figure 162. Age-adjusted incidence rates of gallbladder cancer in males aged 60–69 years in Canada, 1971–2015**

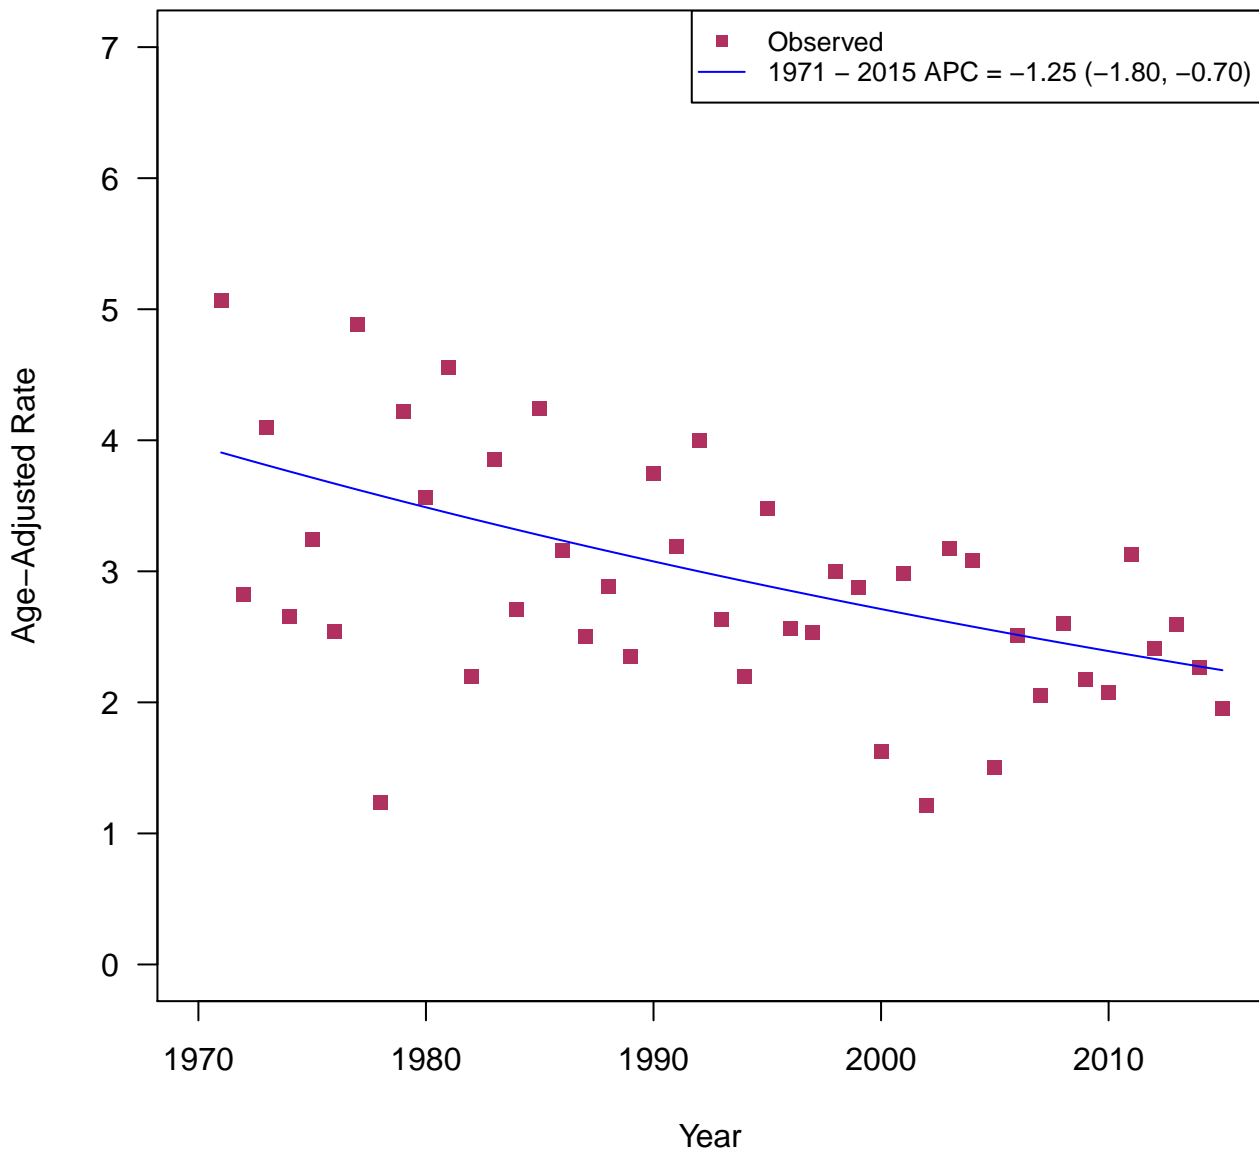

**Figure 163. Age-adjusted incidence rates of gallbladder cancer in males aged 70–79 years in Canada, 1971–2015**

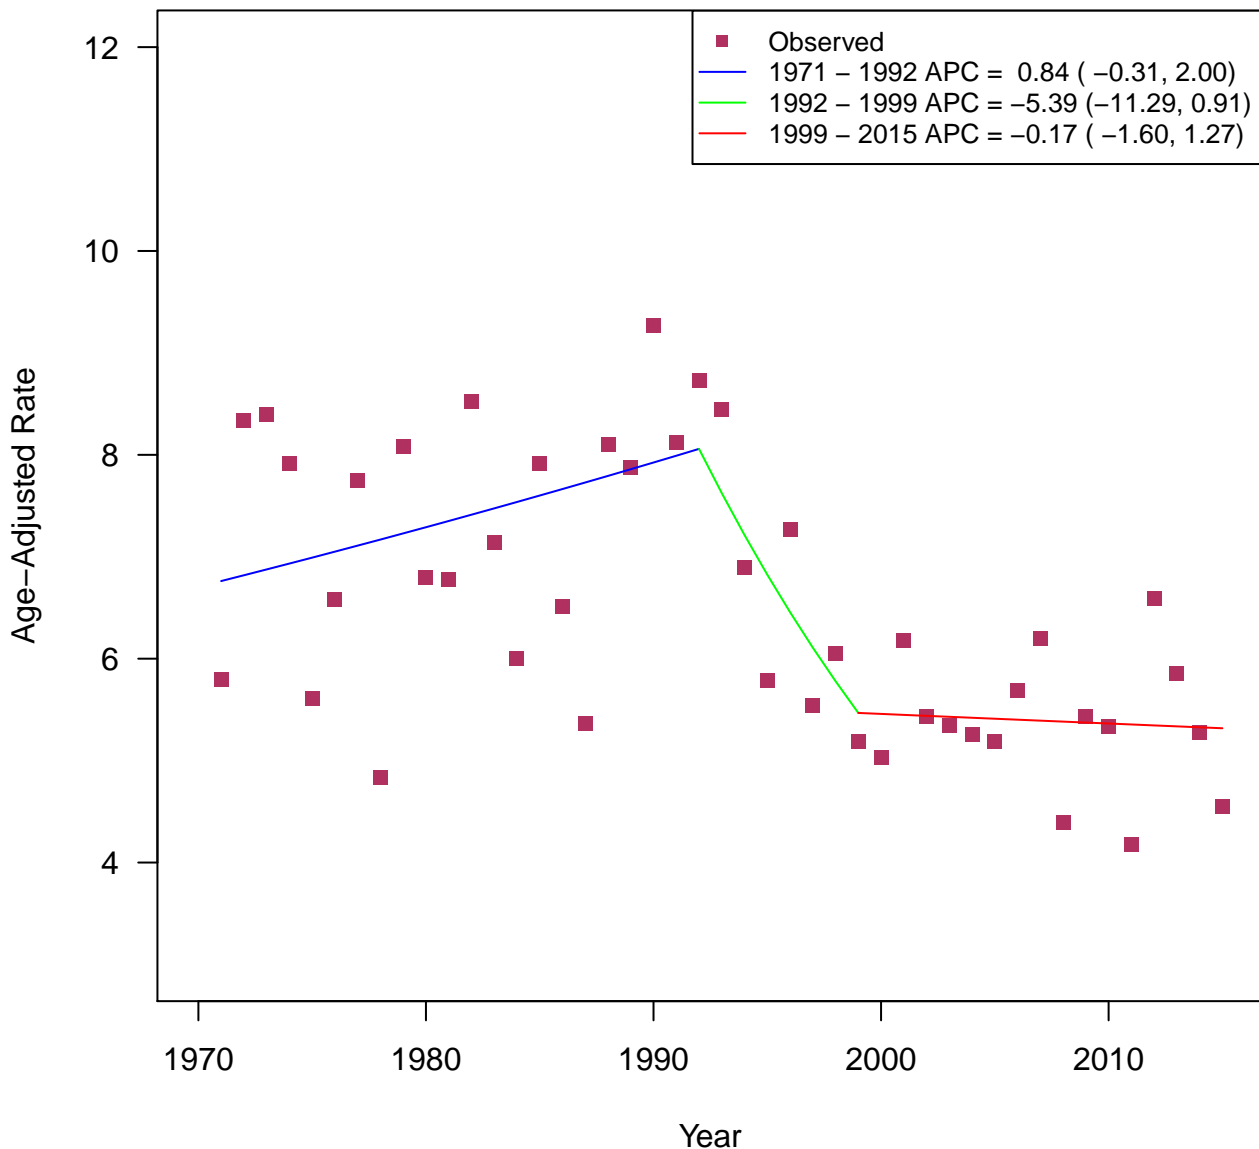



**Figure 164. Age-adjusted incidence rates of gallbladder cancer in males aged 80–89 years in Canada, 1971–2015**

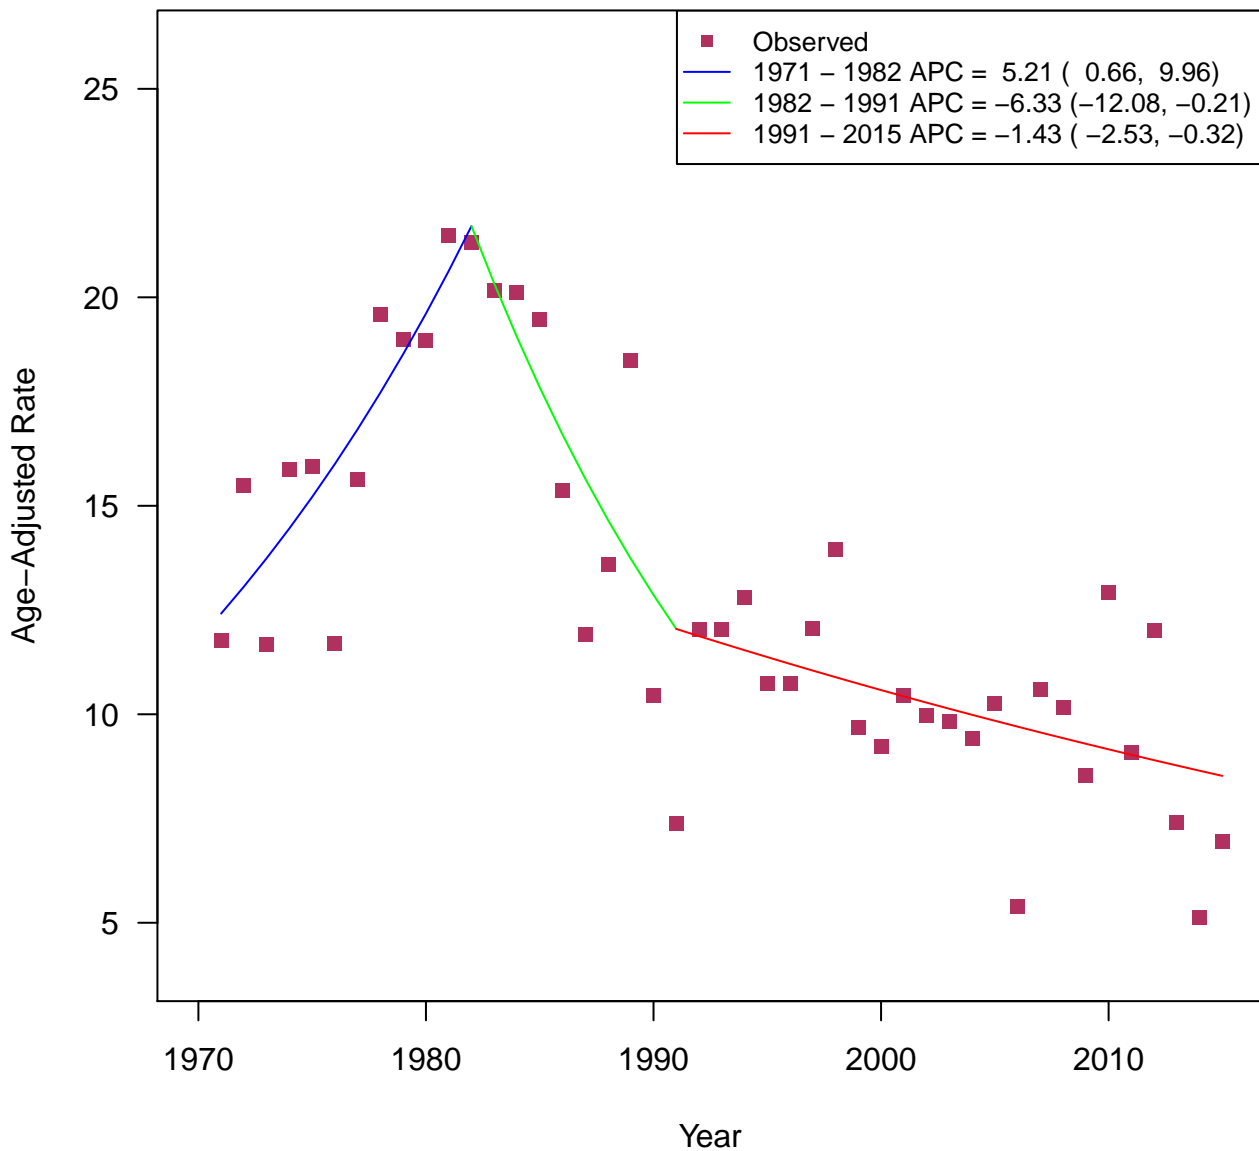

**Figure 165. Age-adjusted incidence rates of gallbladder cancer in females aged 20–29 years in Canada, 1971–2015**



**Figure 166. Age-adjusted incidence rates of gallbladder cancer in females aged 20–39 years in Canada, 1971–2015**

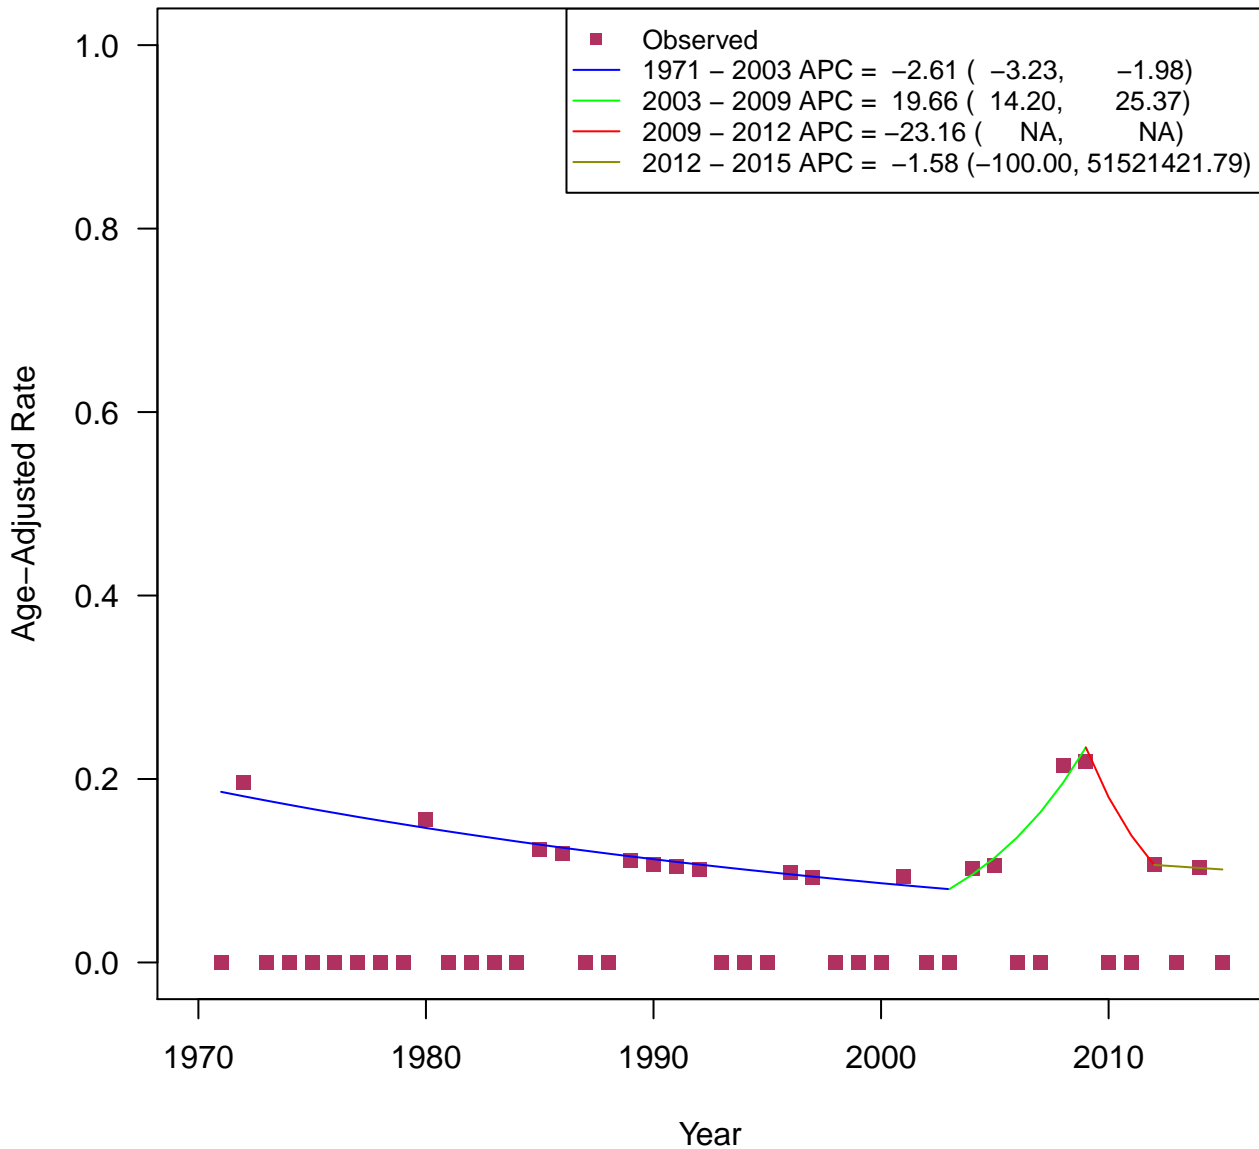

**Figure 167. Age-adjusted incidence rates of gallbladder cancer in females aged 20–49 years in Canada, 1971–2015**

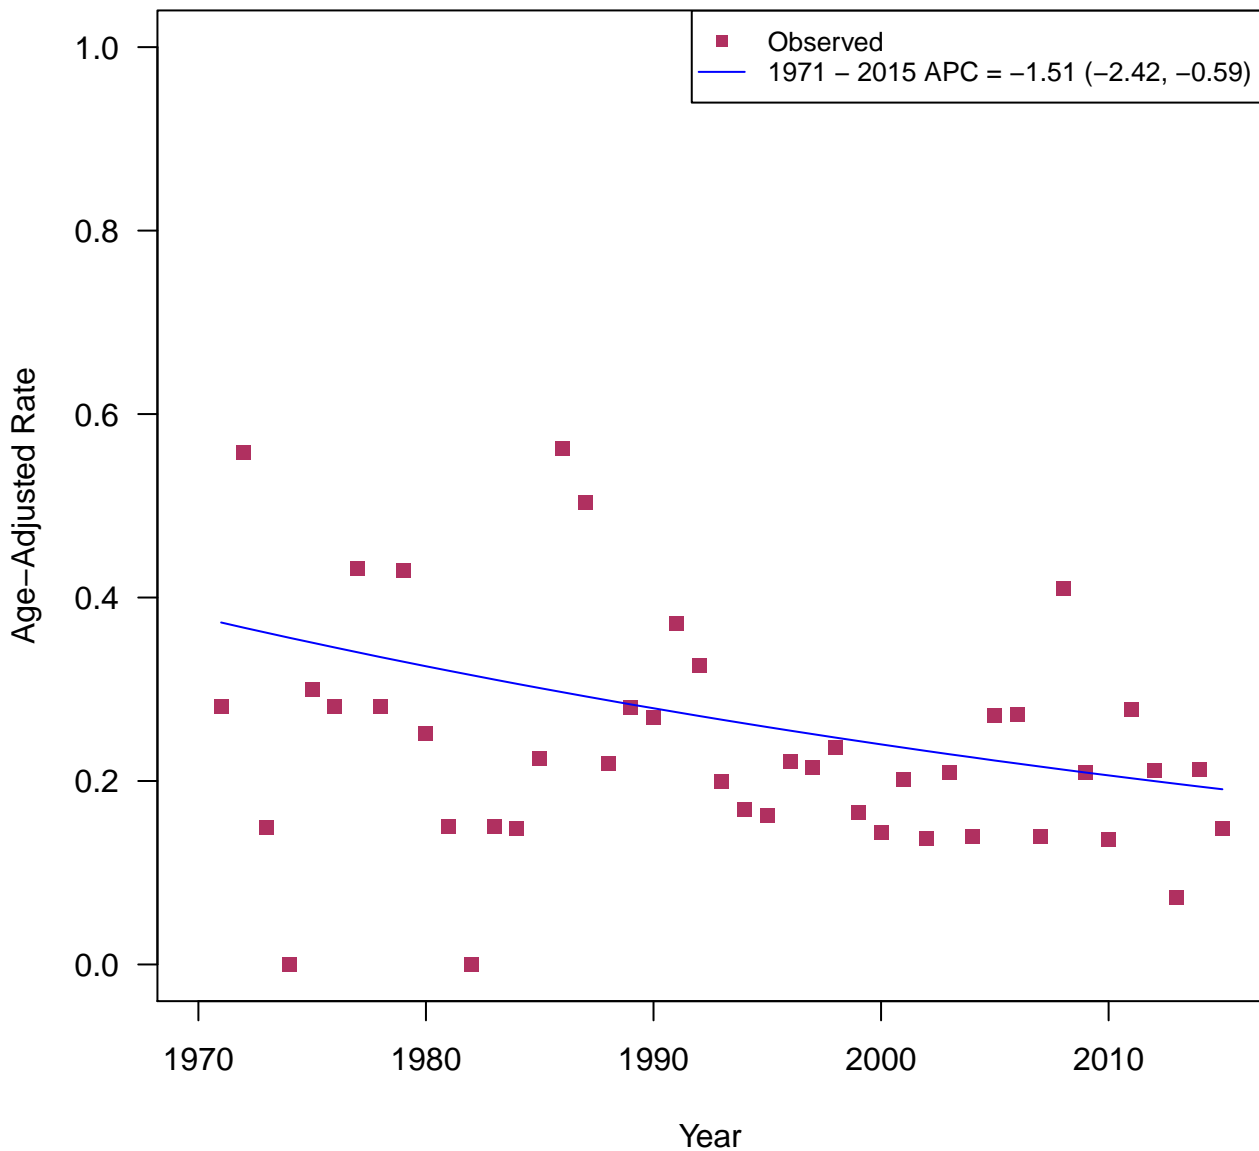

**Figure 168. Age-adjusted incidence rates of gallbladder cancer in females aged 30–39 years in Canada, 1971–2015**

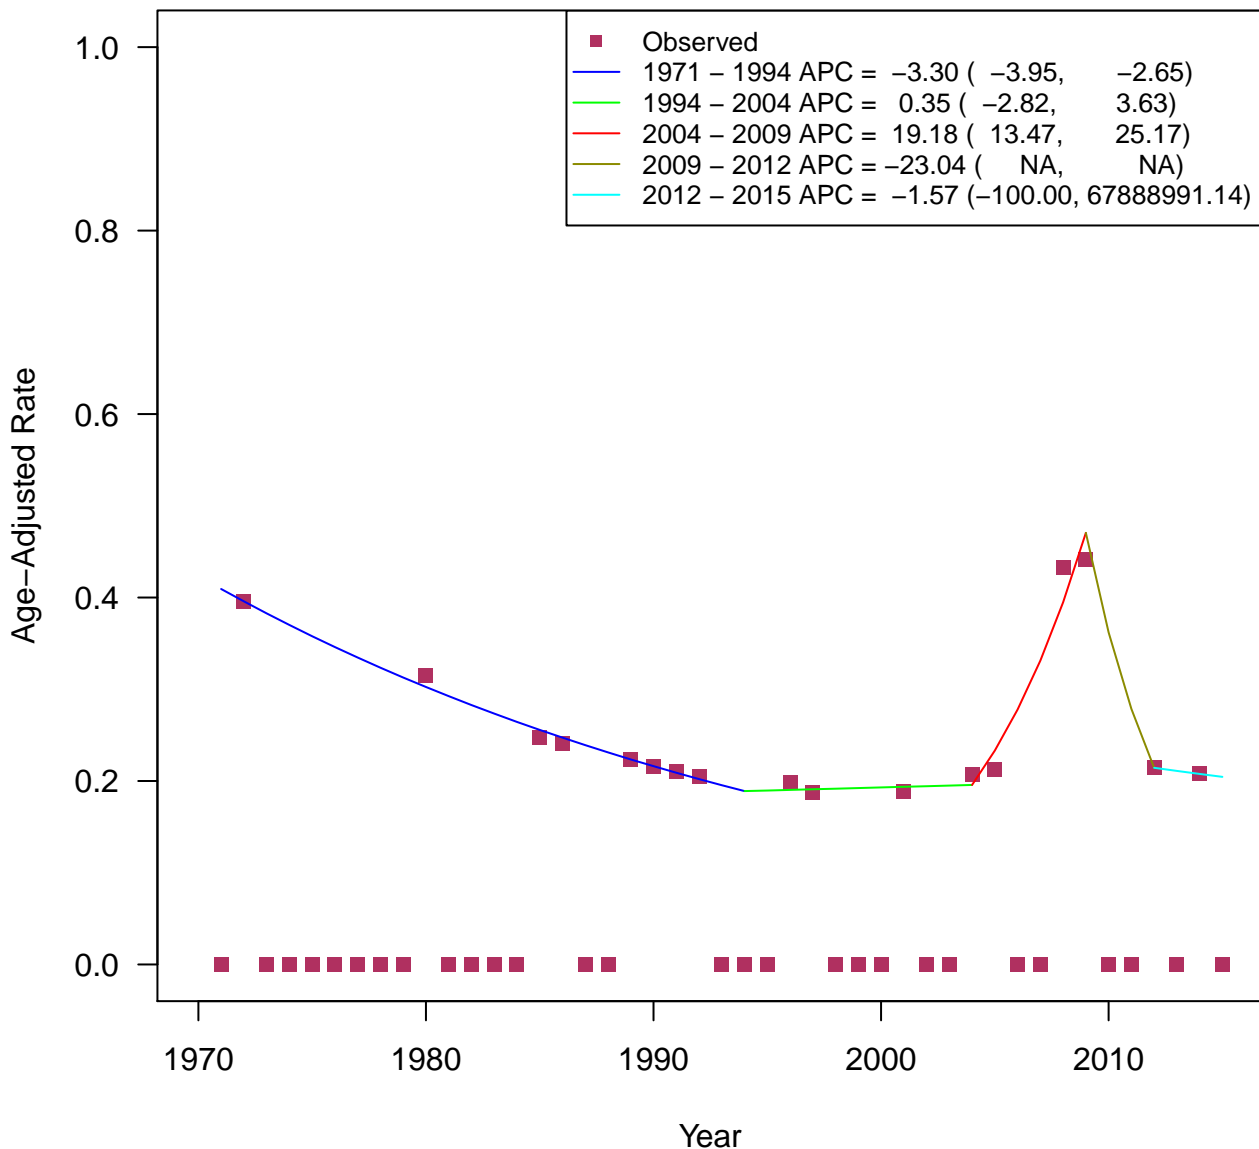

**Figure 169. Age-adjusted incidence rates of gallbladder cancer in females aged 40–49 years in Canada, 1971–2015**

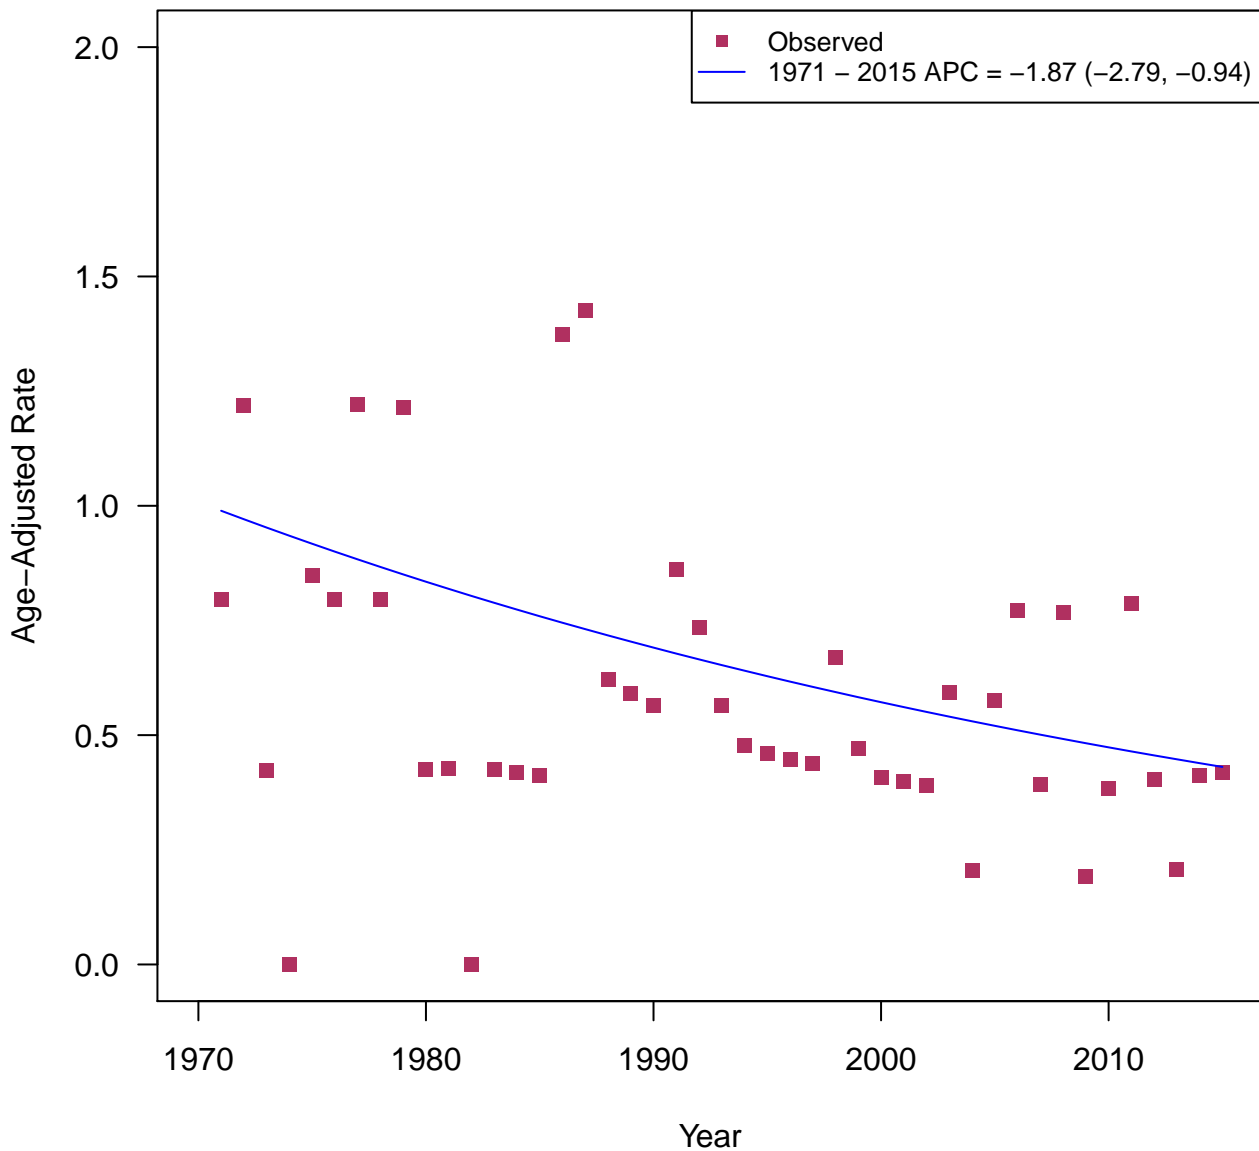

**Figure 170. Age-adjusted incidence rates of gallbladder cancer in females aged 50–59 years in Canada, 1971–2015**

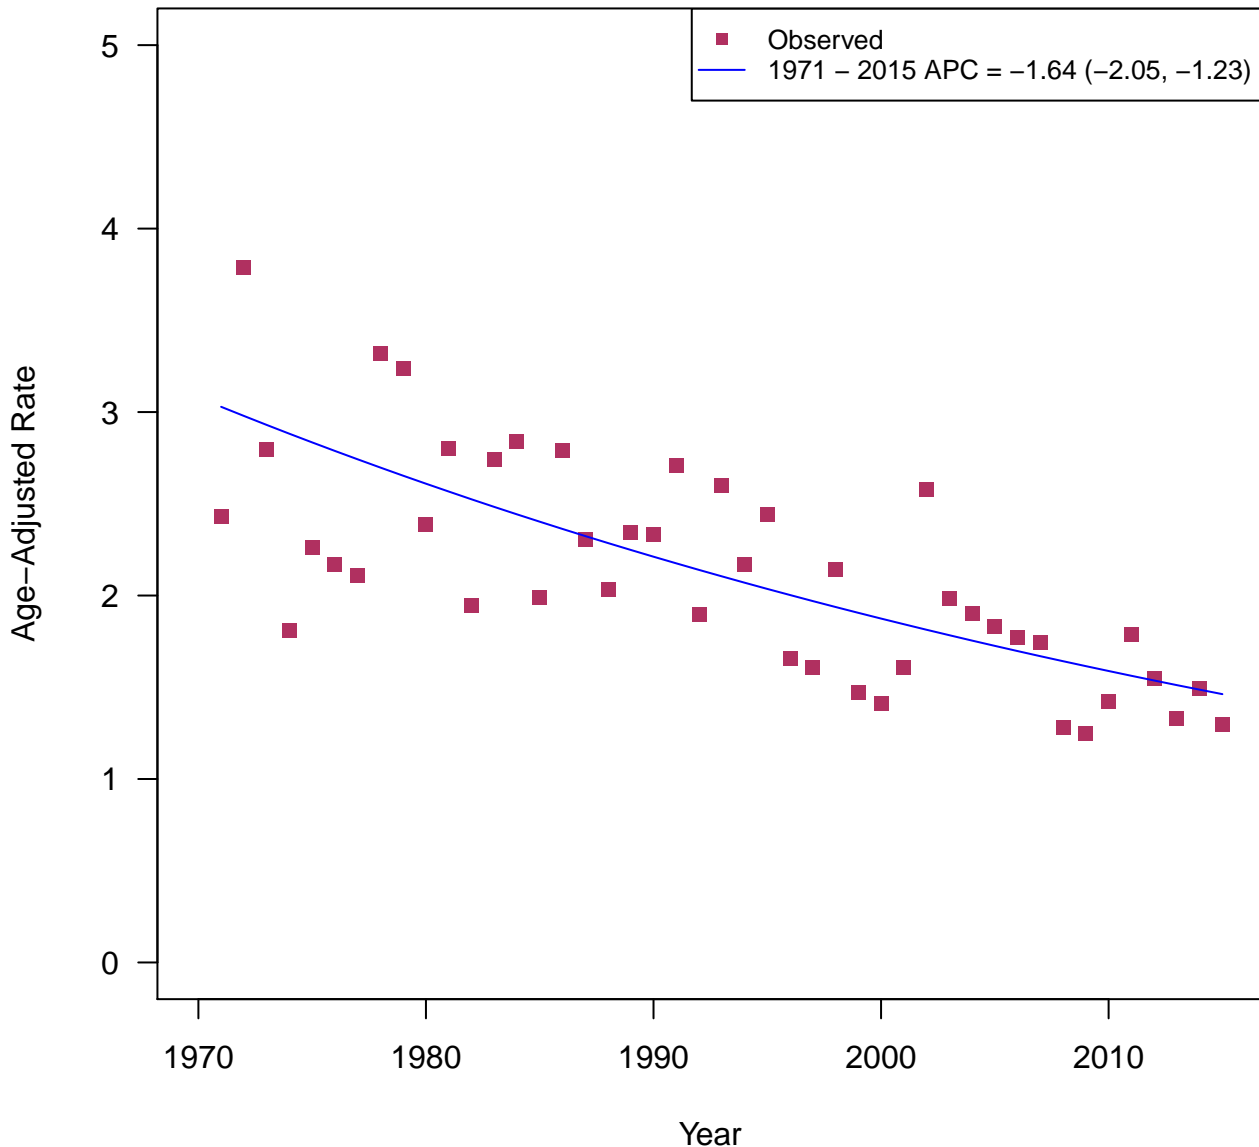

**Figure 171. Age-adjusted incidence rates of gallbladder cancer in females aged 60–69 years in Canada, 1971–2015**

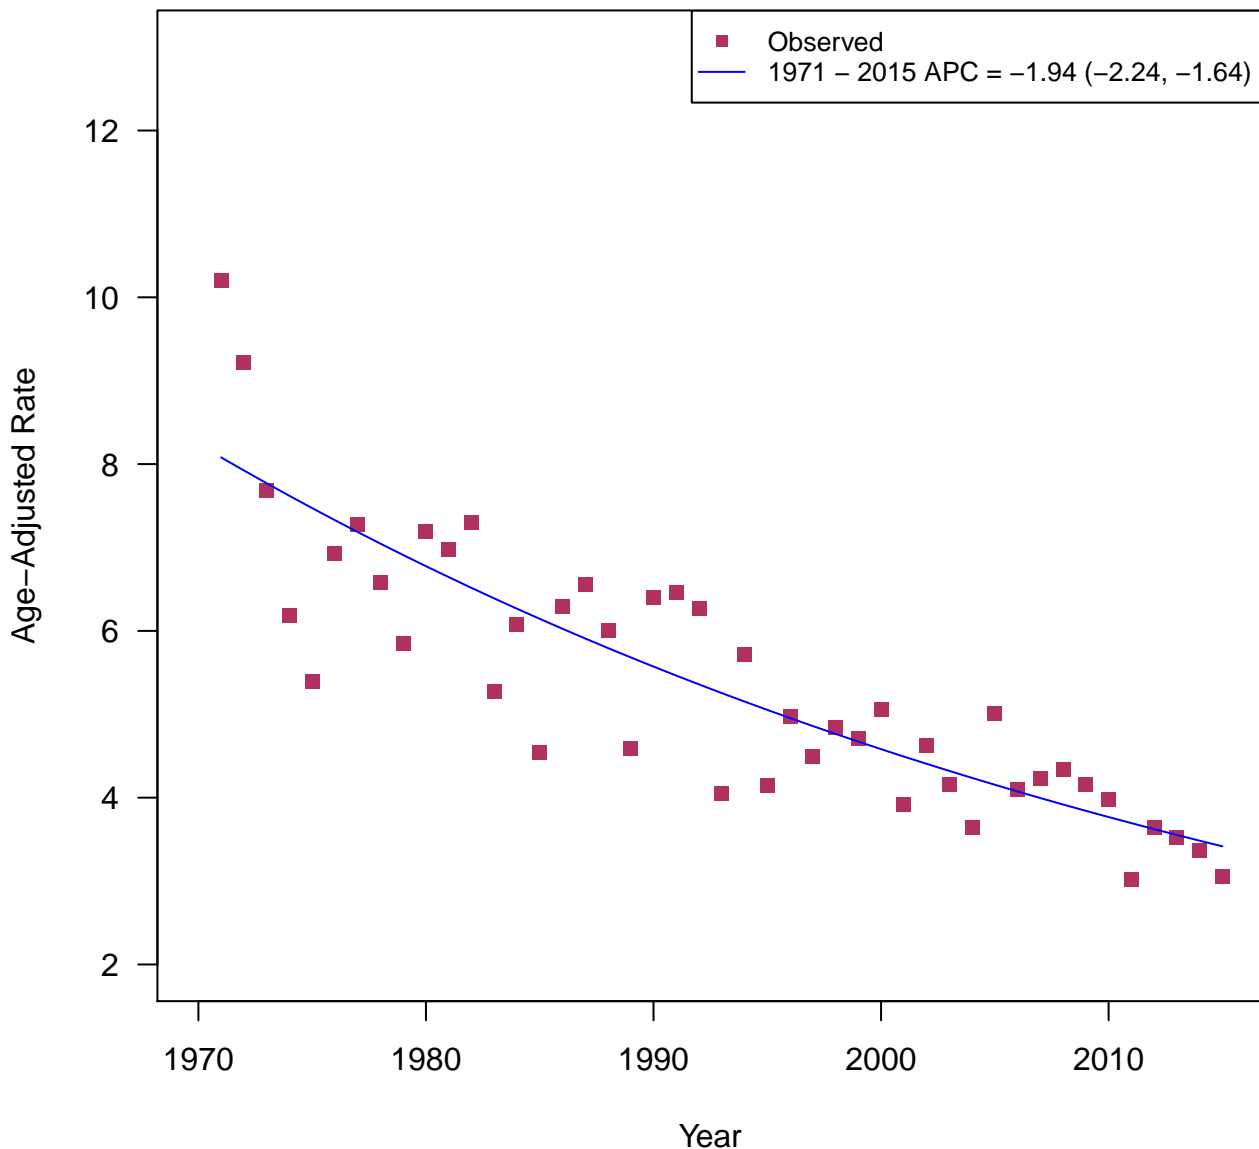



**Figure 172. Age-adjusted incidence rates of gallbladder cancer in females aged 70–79 years in Canada, 1971–2015**

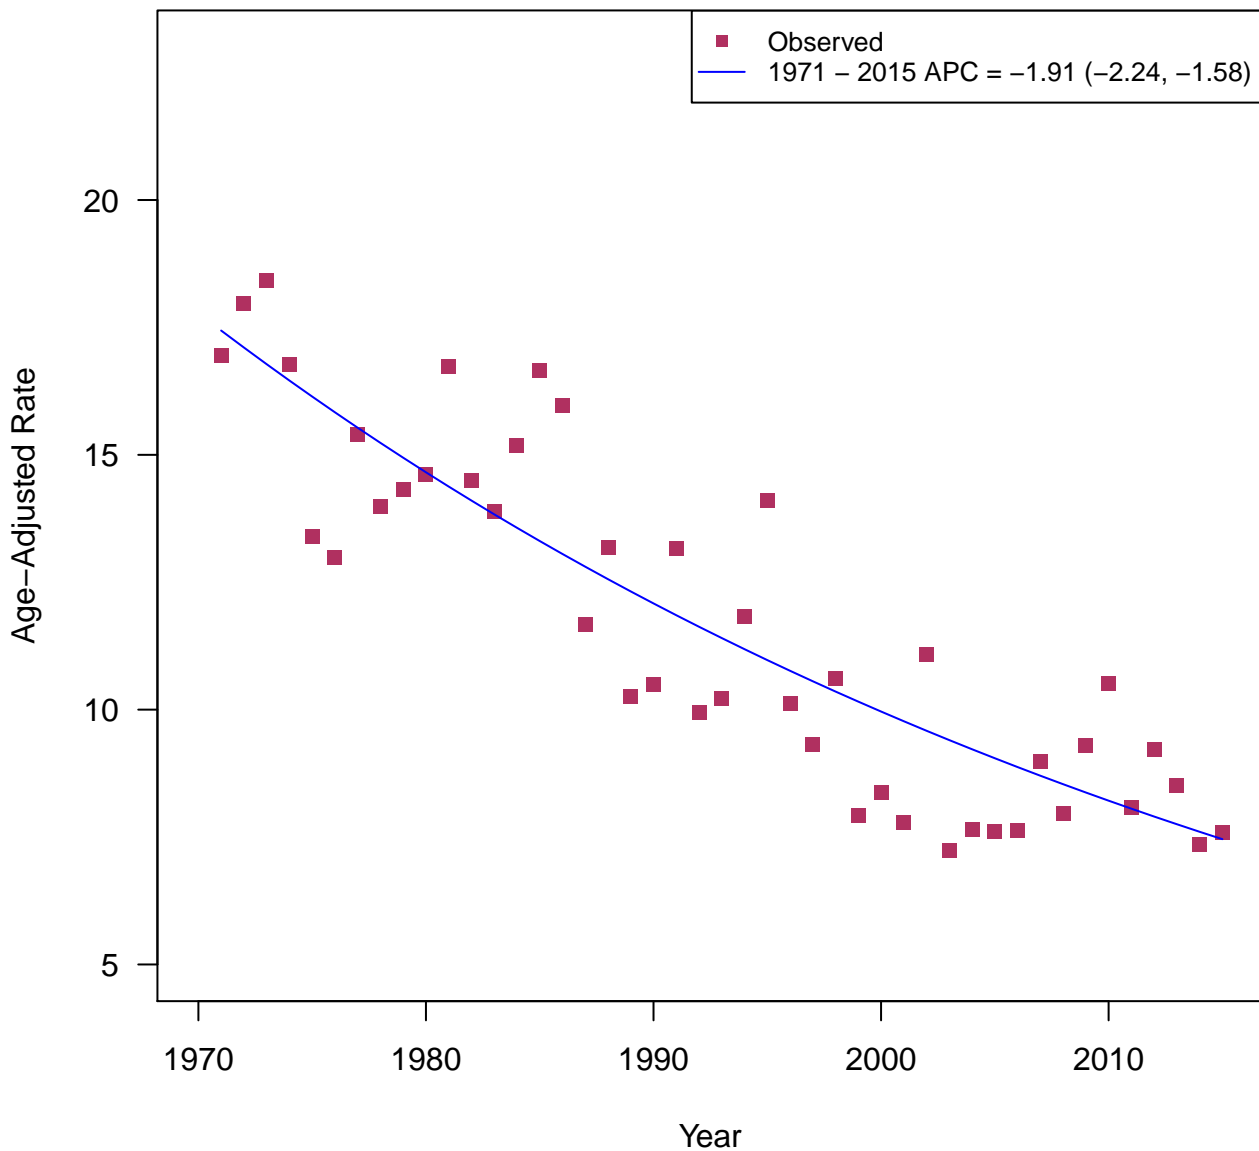

**Figure 173. Age-adjusted incidence rates of gallbladder cancer in females aged 80–89 years in Canada, 1971–2015**

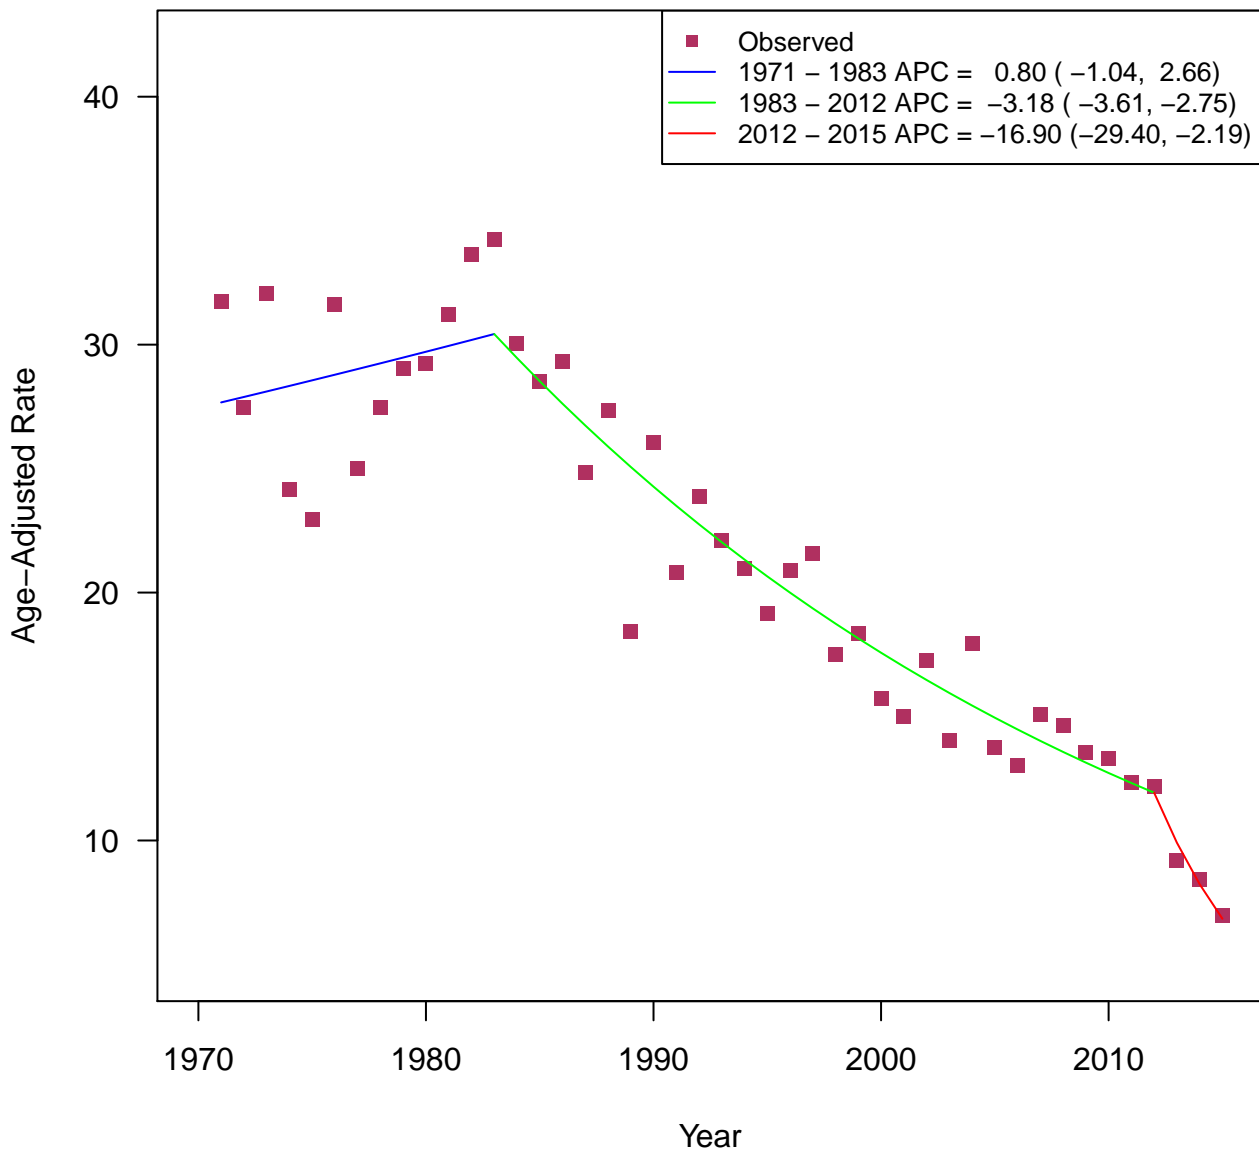

**Figure 174. Age-adjusted incidence rates of kidney cancer in males aged 20–29 years in Canada, 1971–2015**

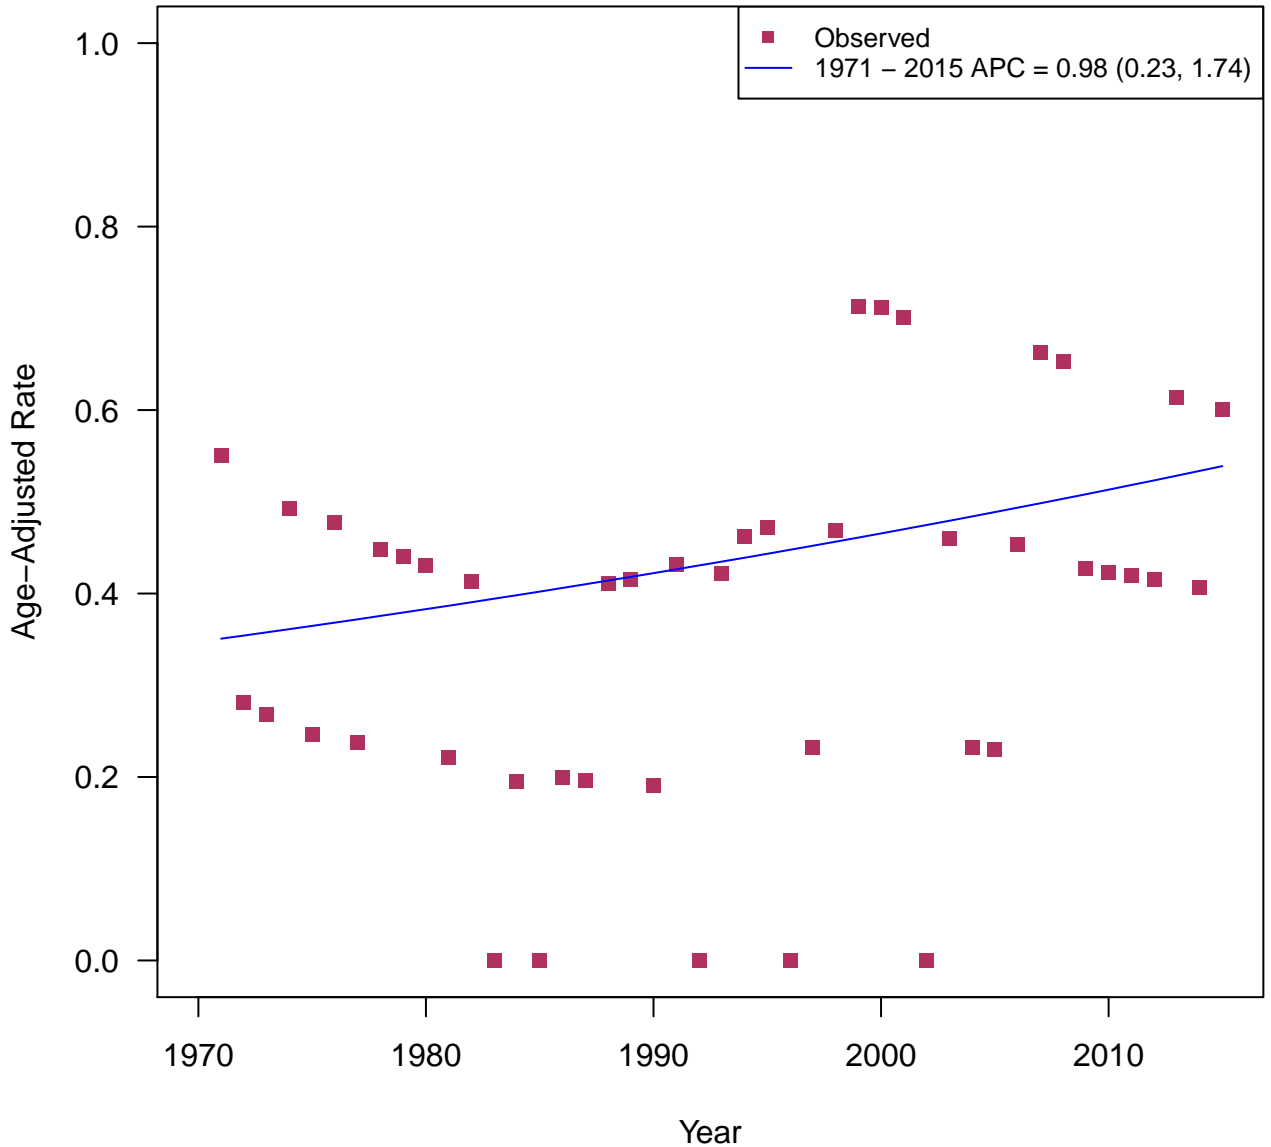

**Figure 175. Age-adjusted incidence rates of kidney cancer in males aged 20–39 years in Canada, 1971–2015**

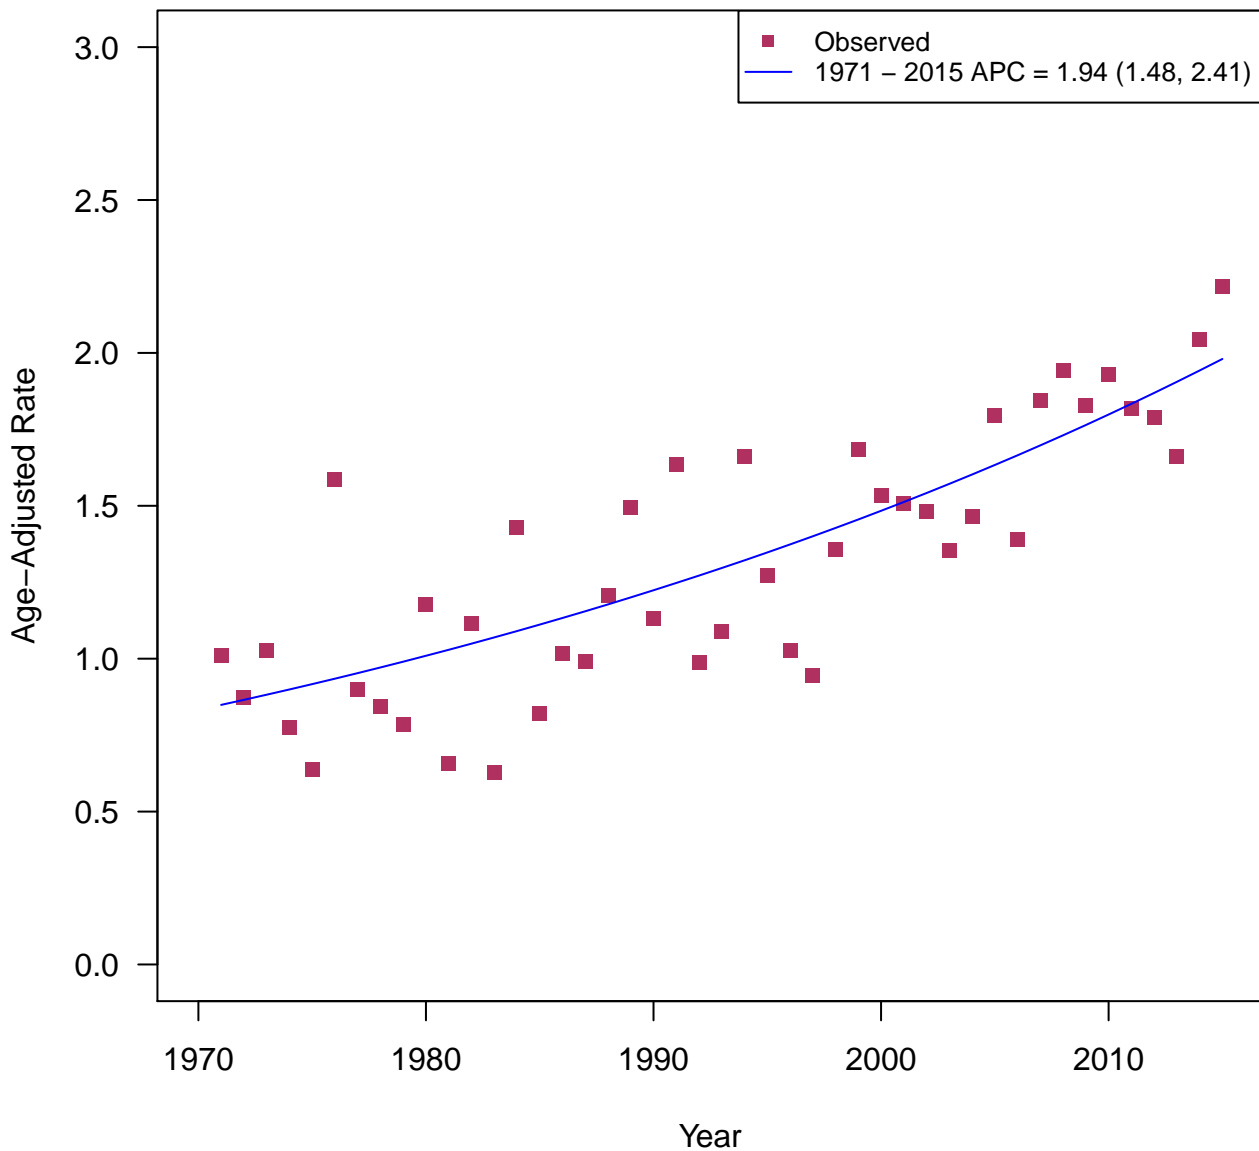

**Figure 176. Age-adjusted incidence rates of kidney cancer in males aged 20–49 years in Canada, 1971–2015**

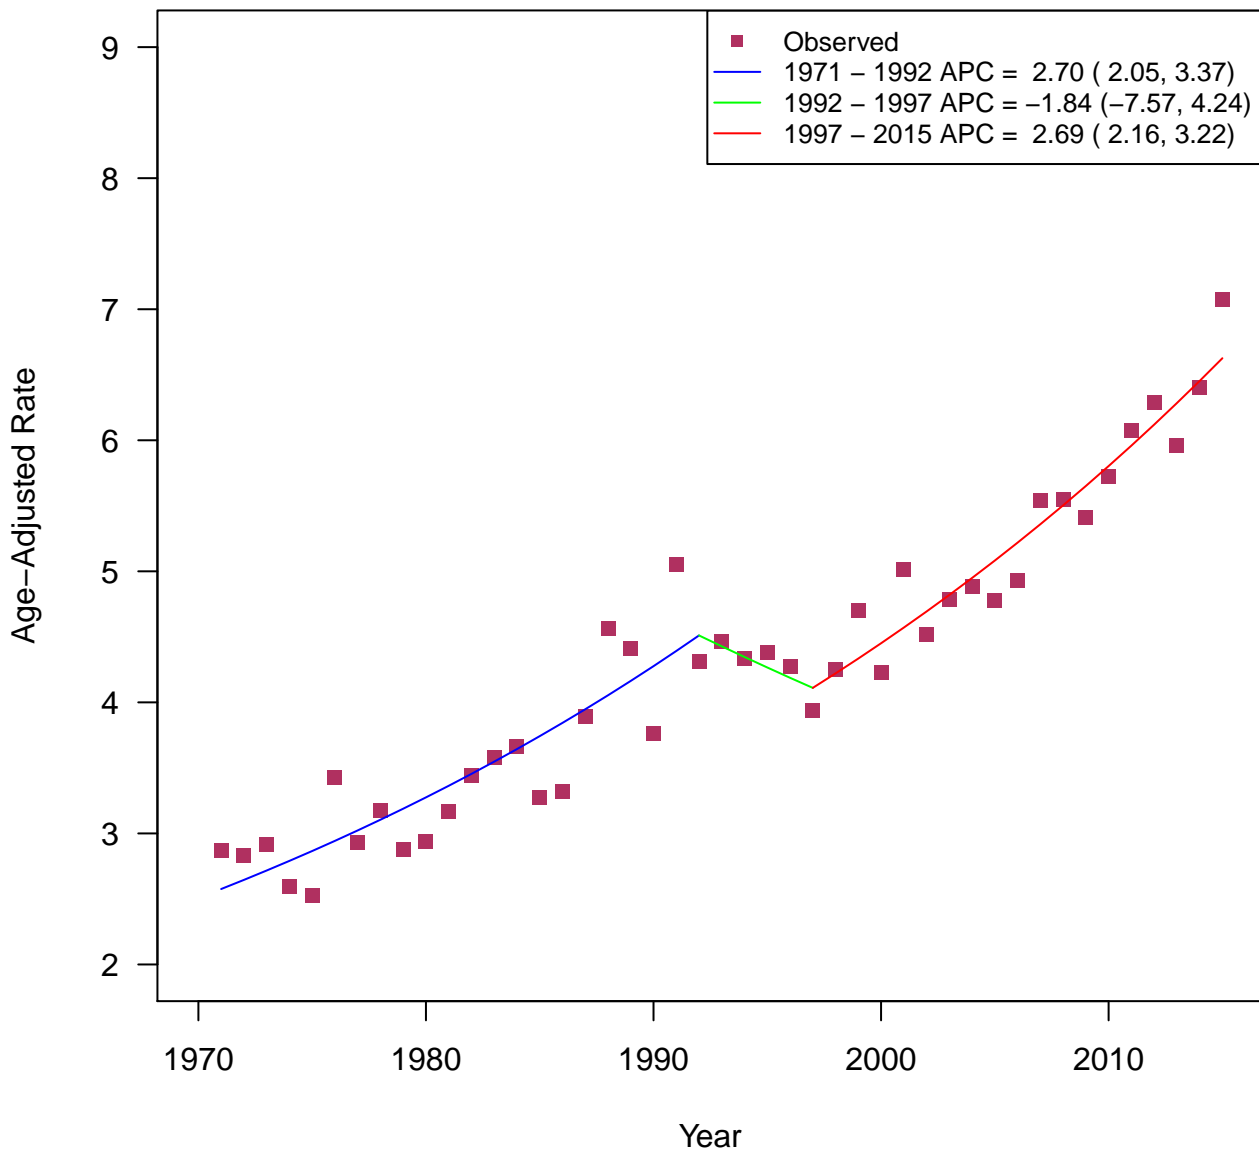

**Figure 177. Age-adjusted incidence rates of kidney cancer in males aged 30–39 years in Canada, 1971–2015**

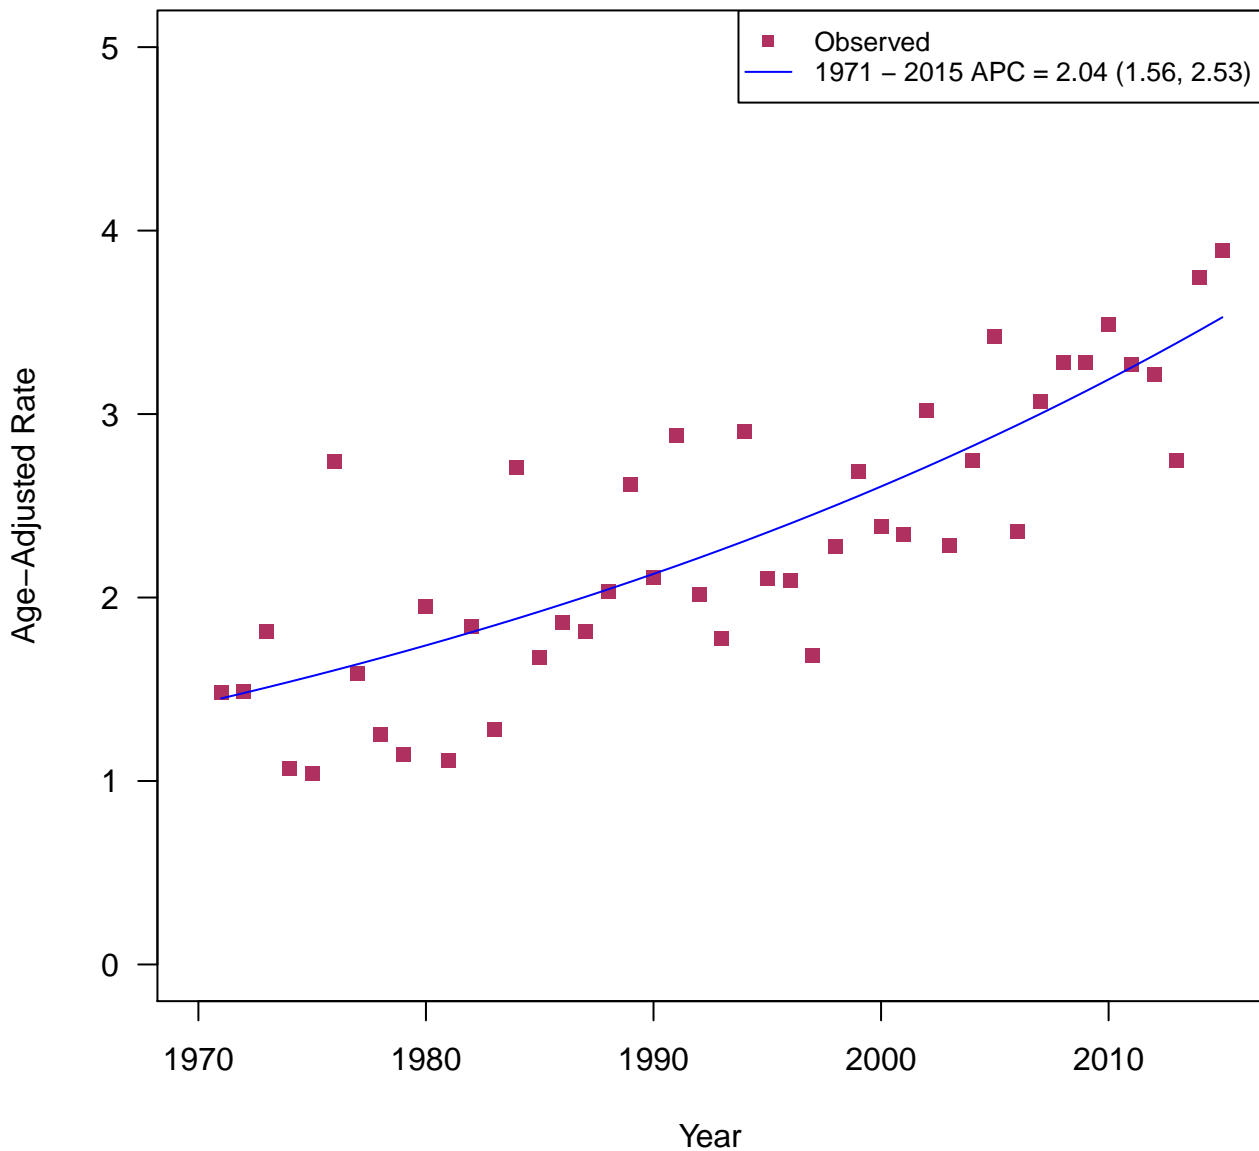

**Figure 178. Age-adjusted incidence rates of kidney cancer in males aged 40–49 years in Canada, 1971–2015**

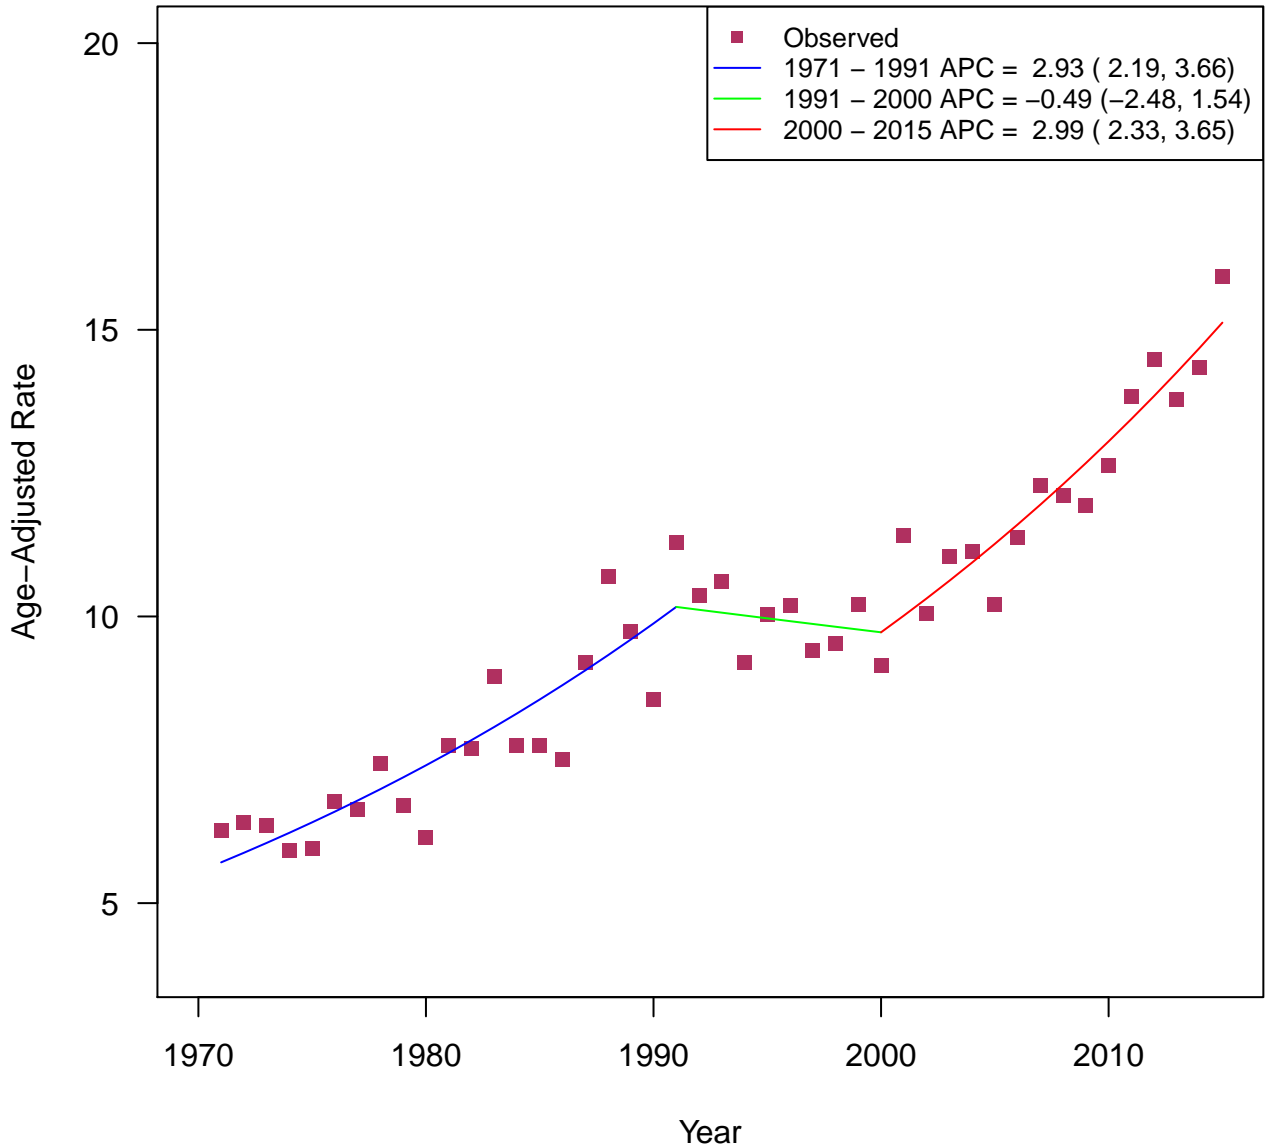

**Figure 179. Age-adjusted incidence rates of kidney cancer in males aged 50–59 years in Canada, 1971–2015**

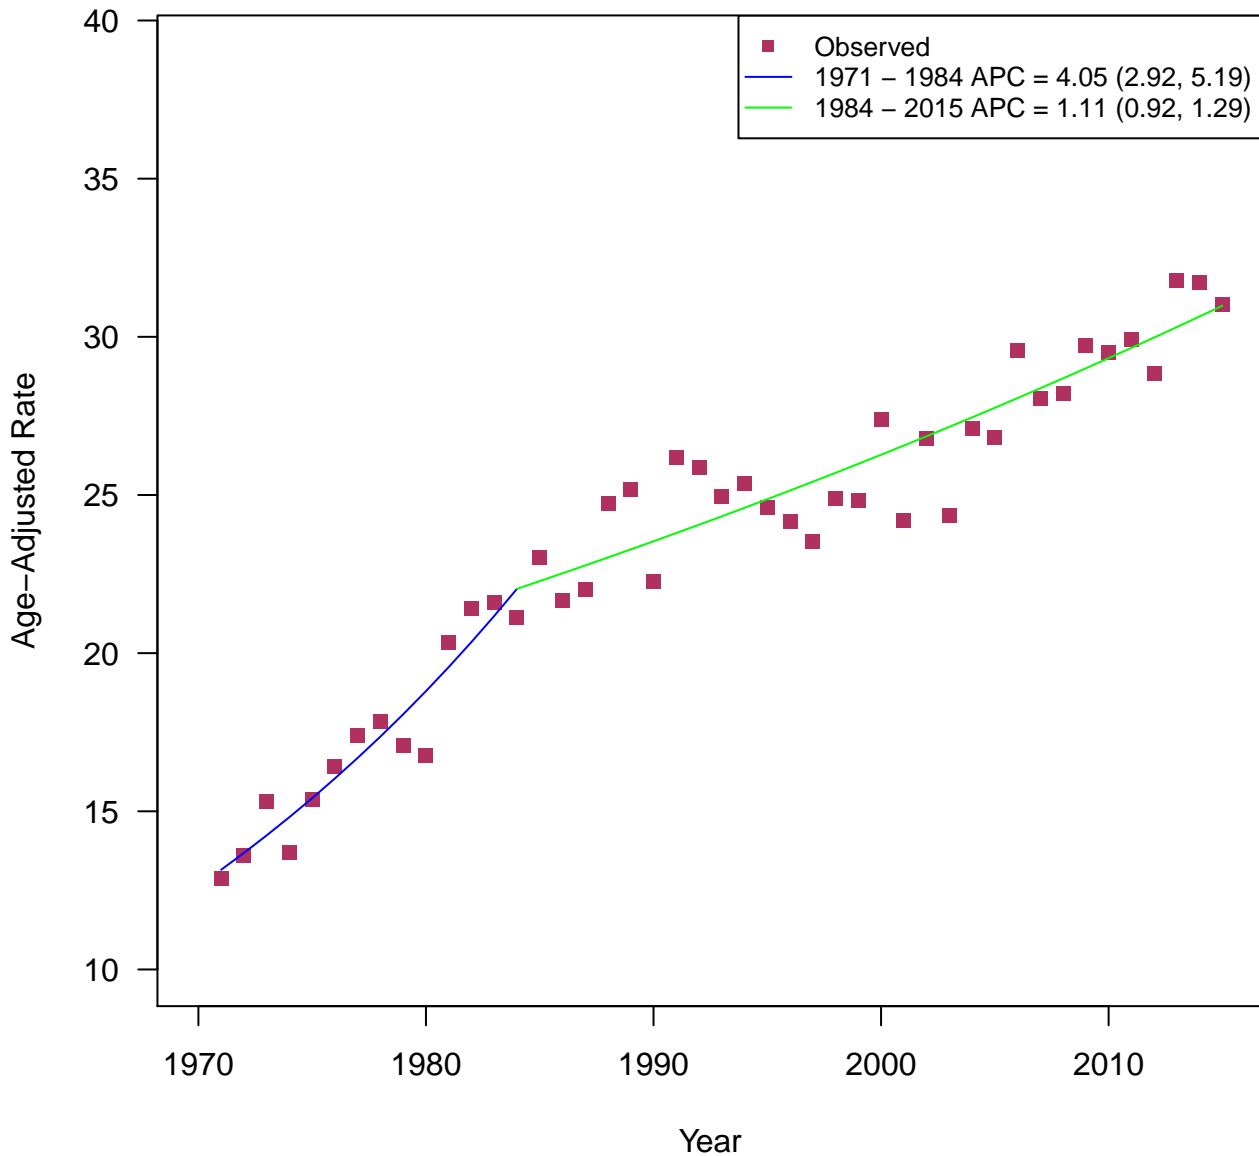



**Figure 180. Age-adjusted incidence rates of kidney cancer in males aged 60–69 years in Canada, 1971–2015**

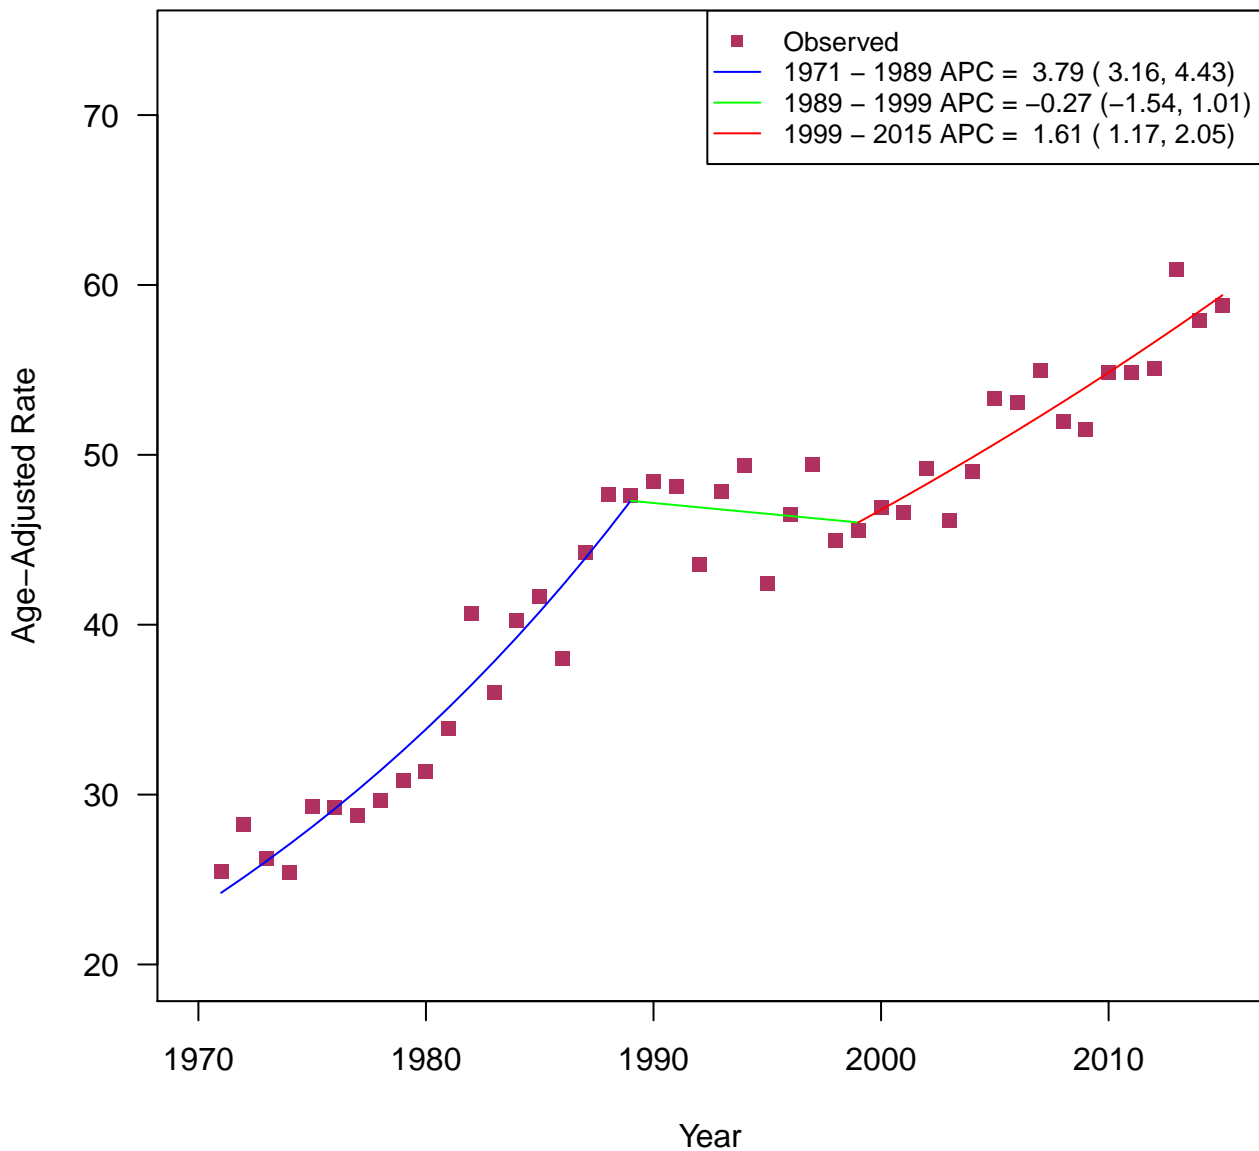

**Figure 181. Age-adjusted incidence rates of kidney cancer in males aged 70–79 years in Canada, 1971–2015**

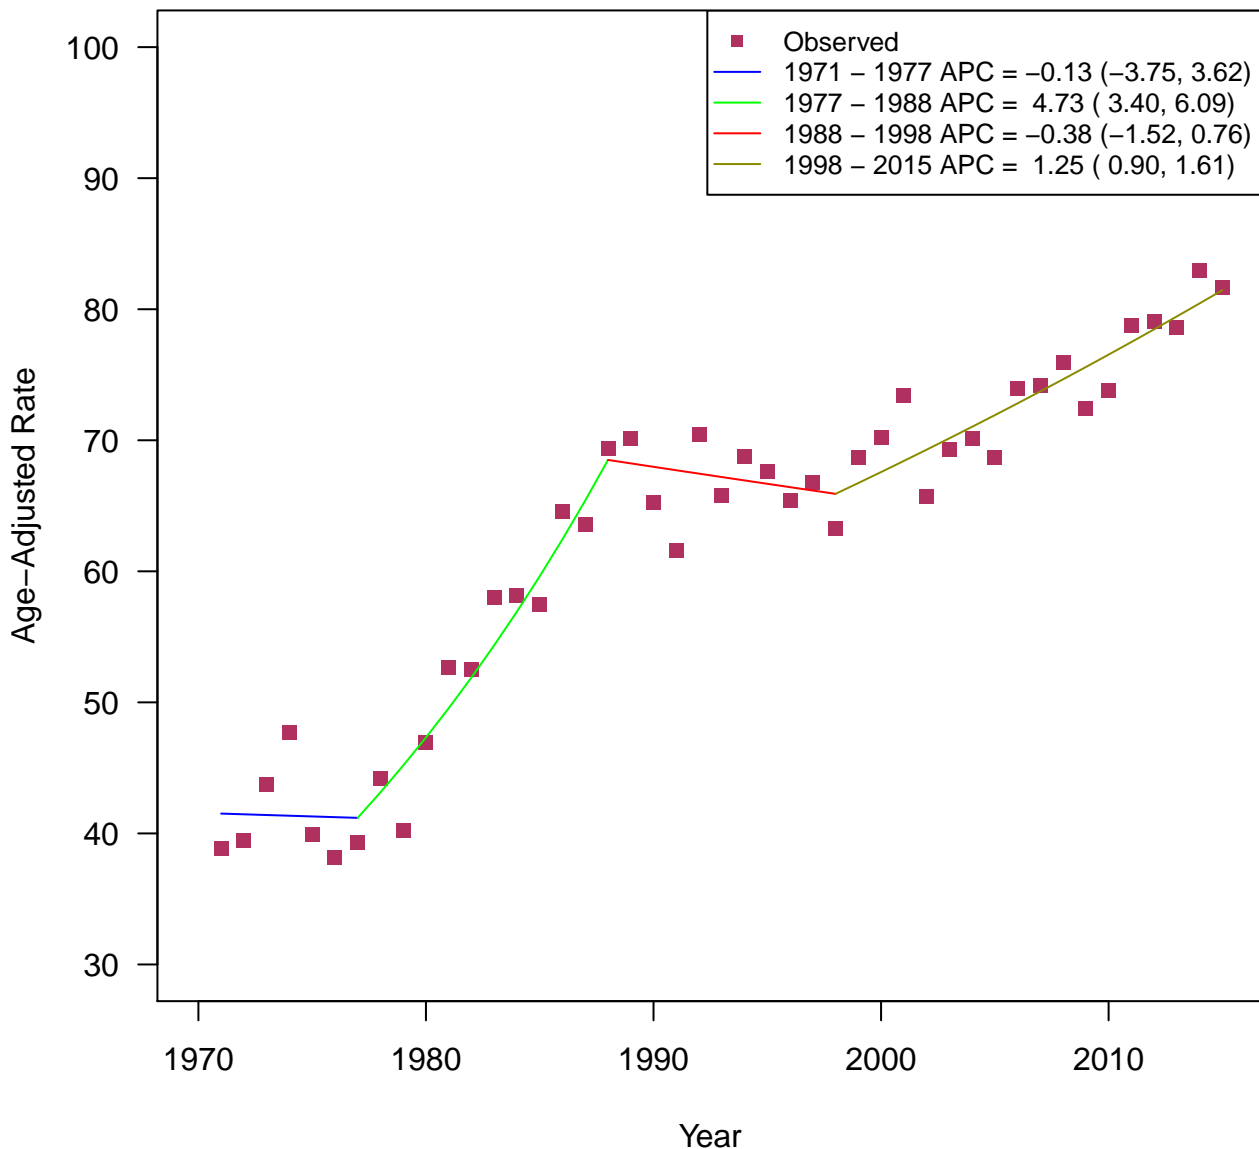

**Figure 182. Age-adjusted incidence rates of kidney cancer in males aged 80–89 years in Canada, 1971–2015**

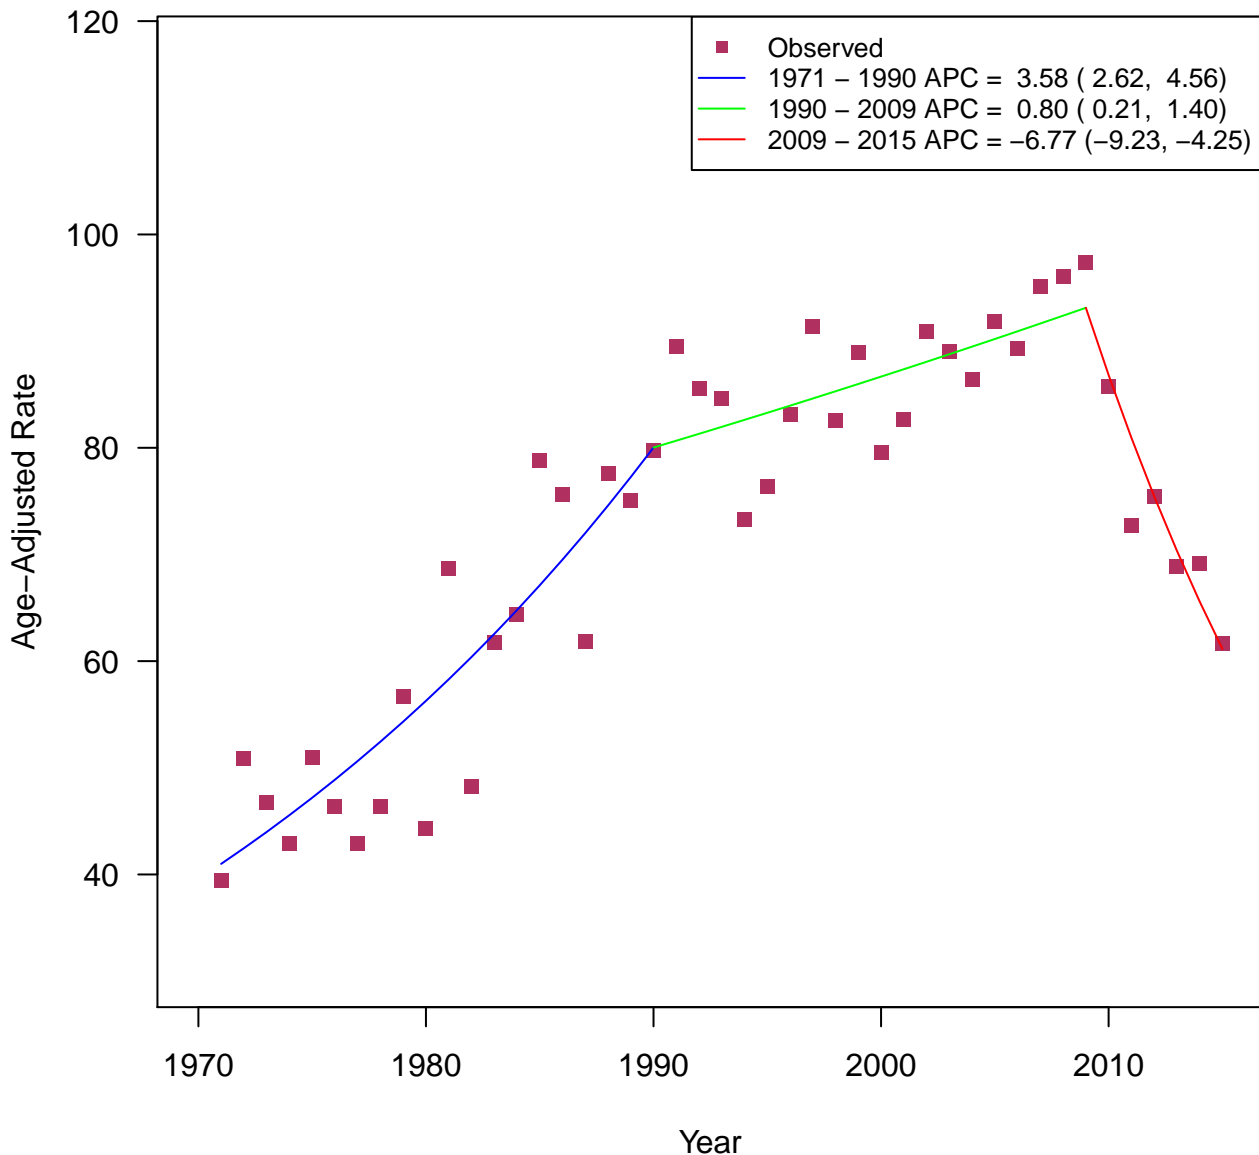

**Figure 183. Age-adjusted incidence rates of kidney cancer in females aged 20–29 years in Canada, 1971–2015**

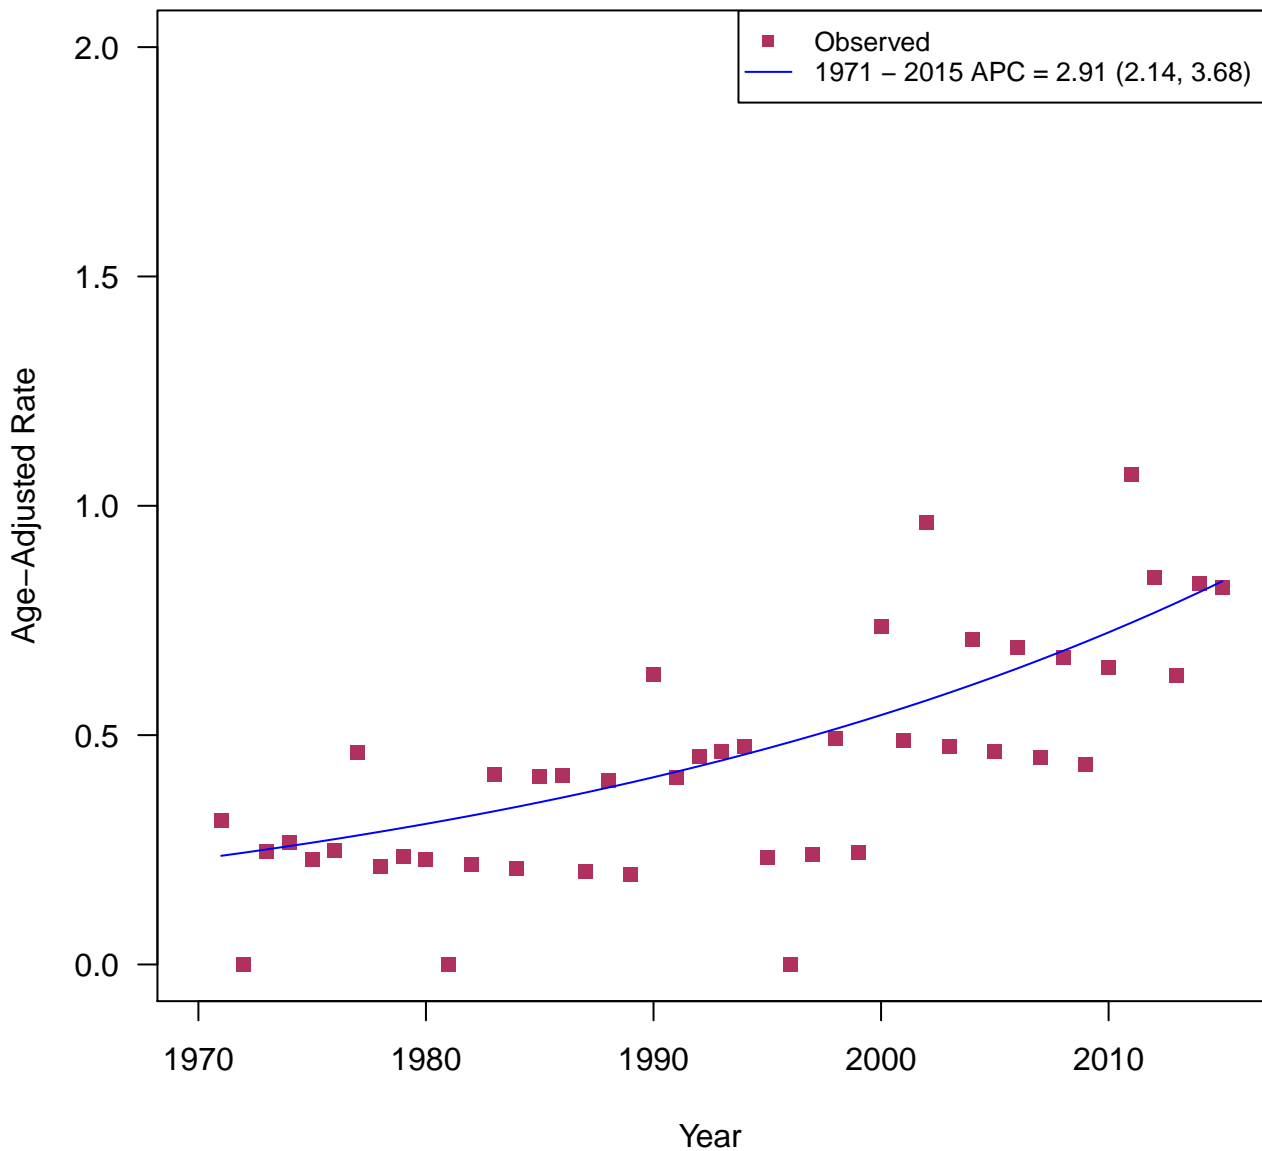

**Figure 184. Age-adjusted incidence rates of kidney cancer in females aged 20–39 years in Canada, 1971–2015**

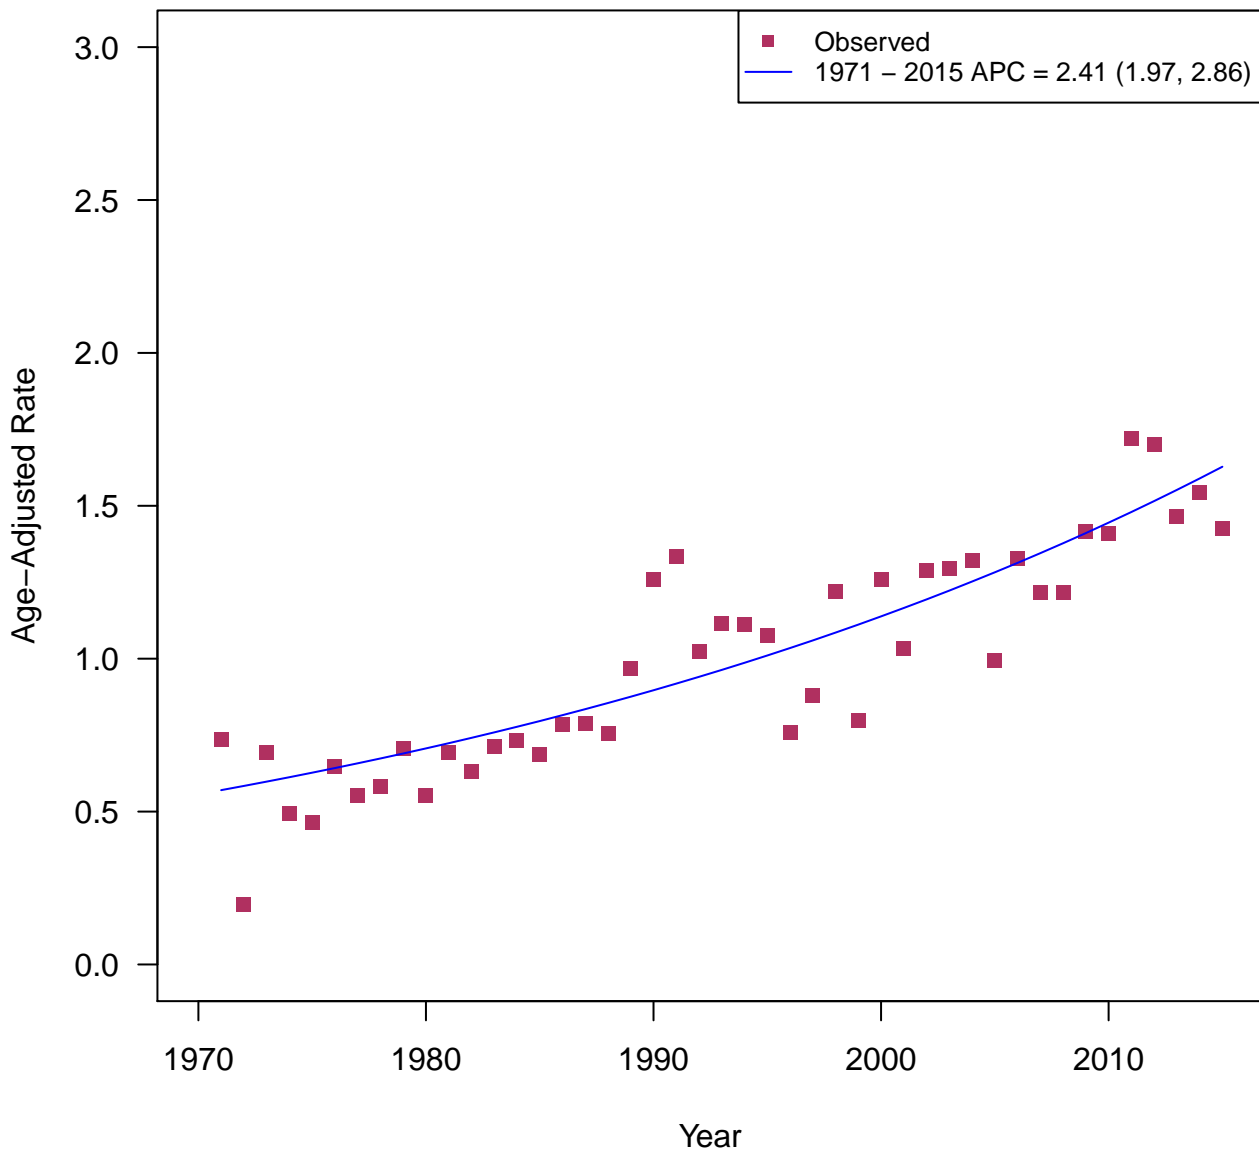

**Figure 185. Age-adjusted incidence rates of kidney cancer in females aged 30–39 years in Canada, 1971–2015**

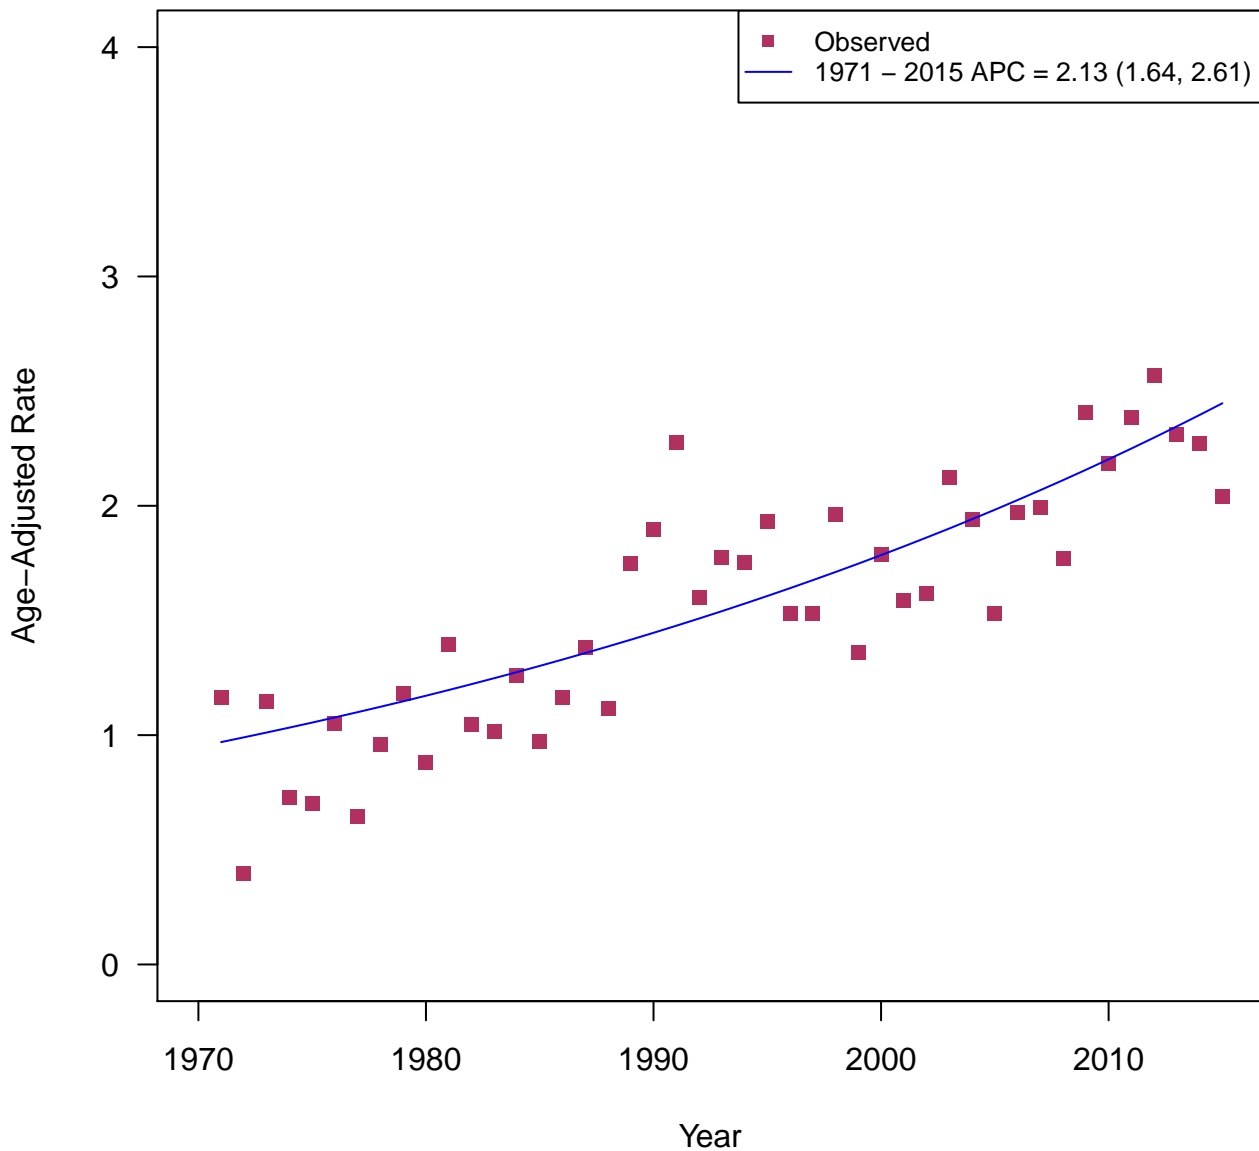

**Figure 186. Age-adjusted incidence rates of kidney cancer in females aged 40–49 years in Canada, 1971–2015**

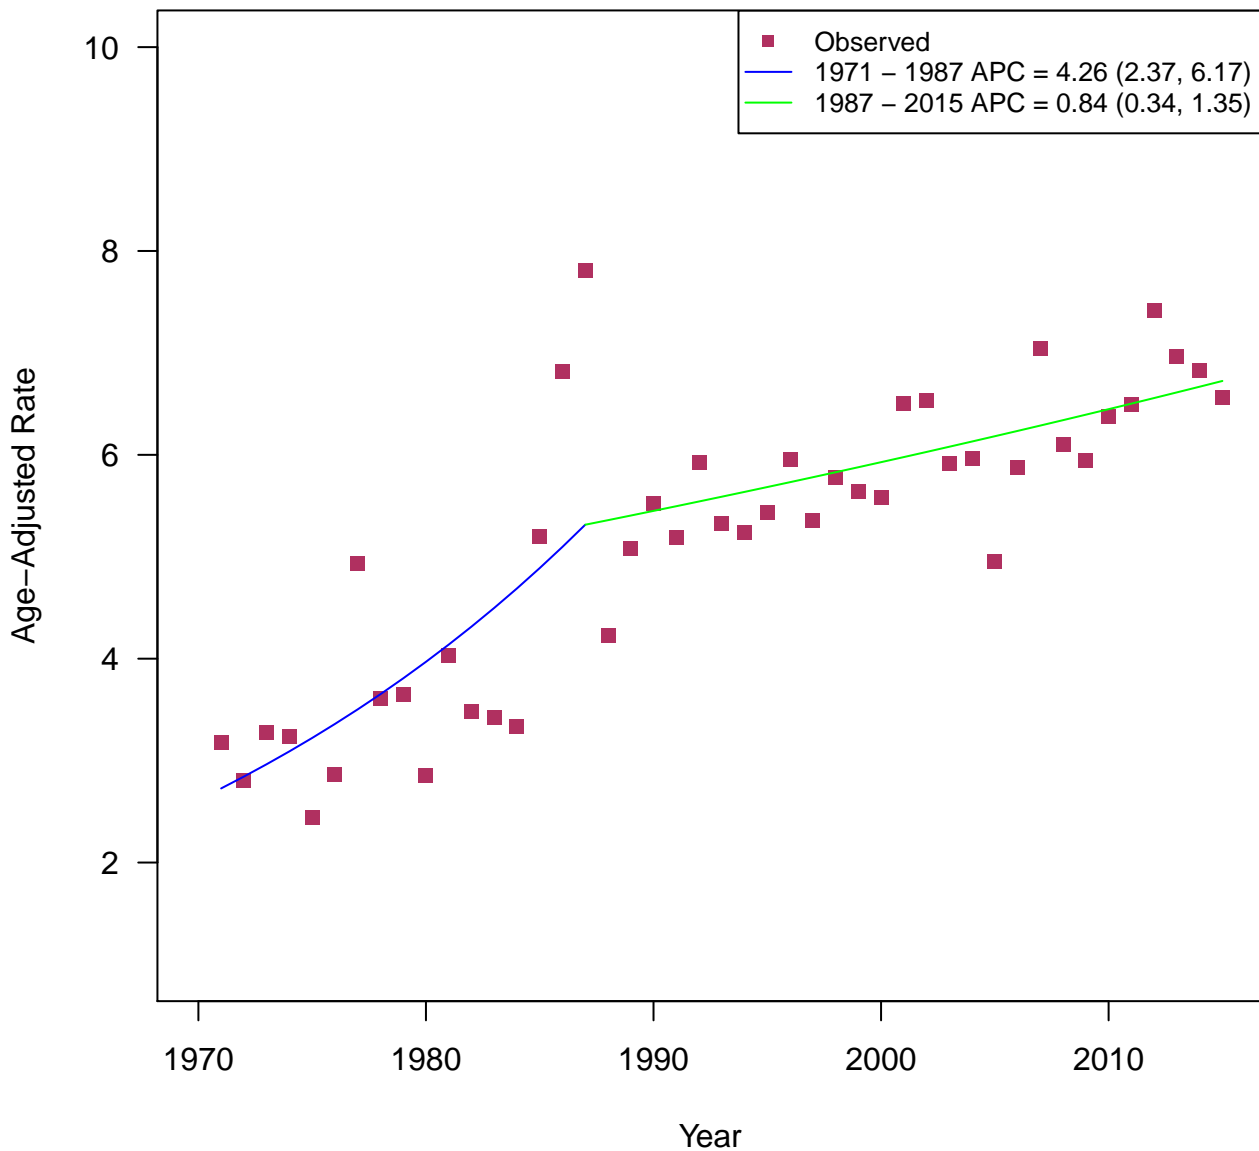

**Figure 187. Age-adjusted incidence rates of kidney cancer in females aged 50–59 years in Canada, 1971–2015**

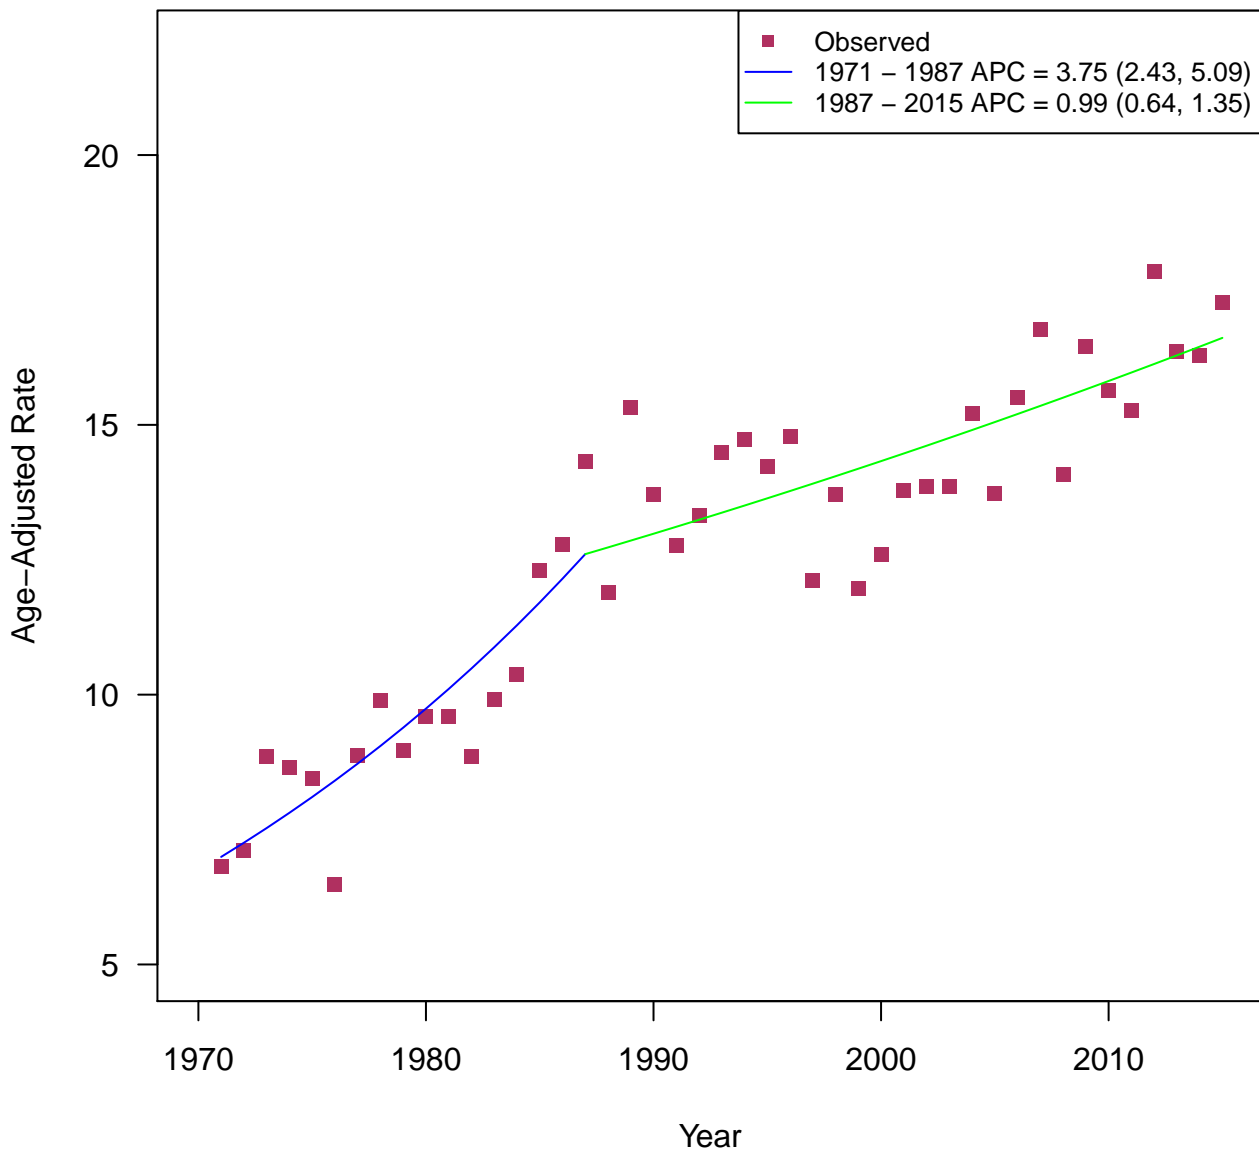



**Figure 188. Age-adjusted incidence rates of kidney cancer in females aged 60–69 years in Canada, 1971–2015**

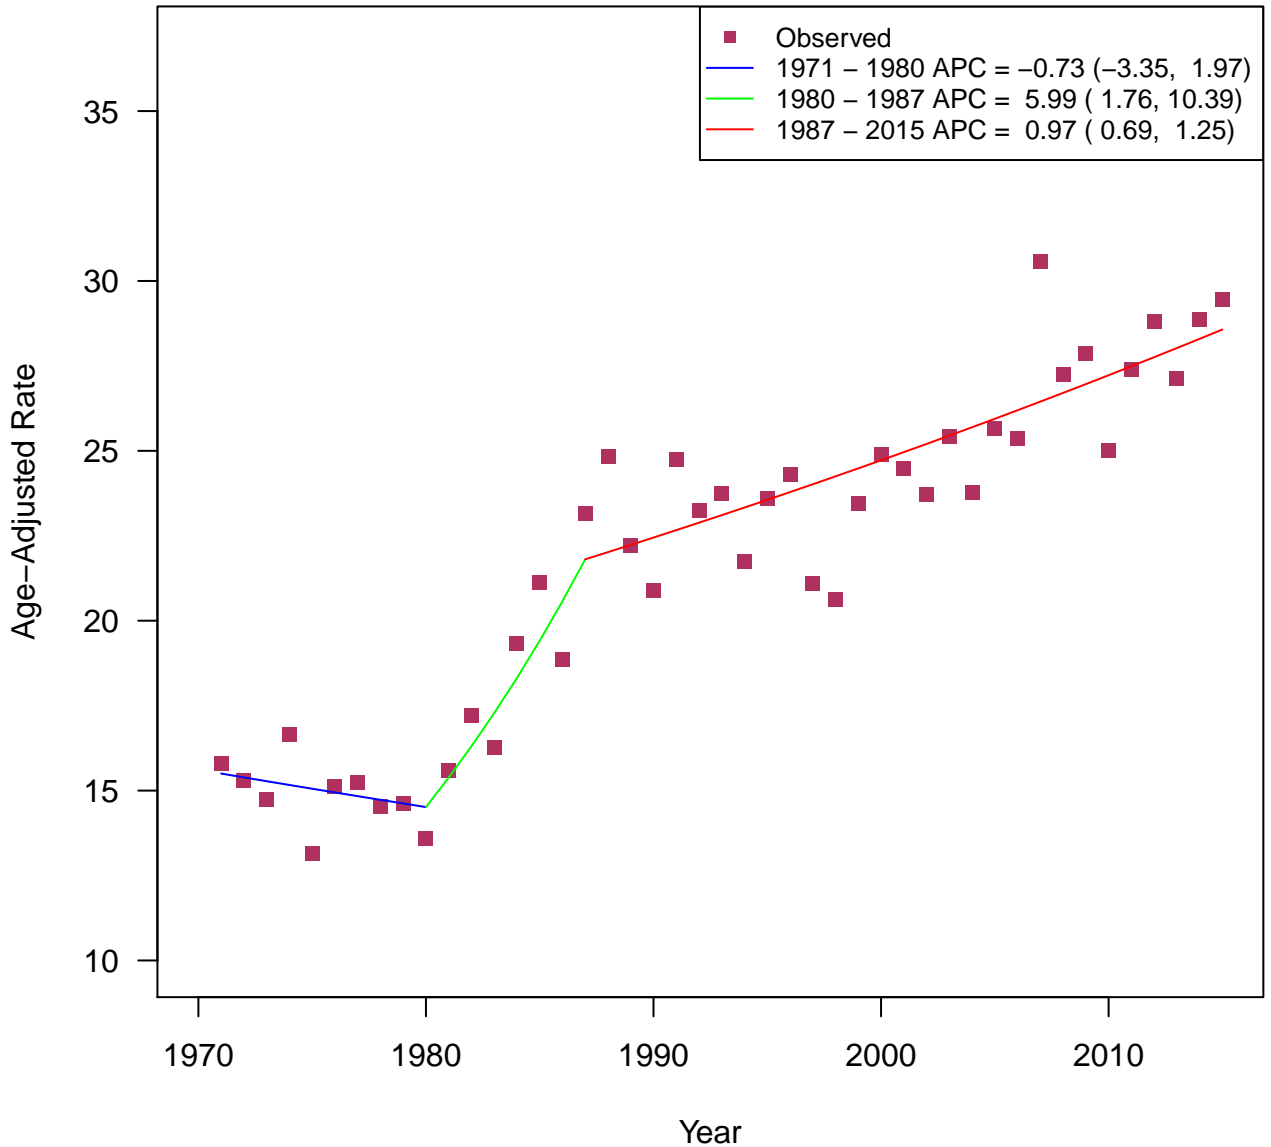

**Figure 189. Age-adjusted incidence rates of kidney cancer in females aged 70–79 years in Canada, 1971–2015**

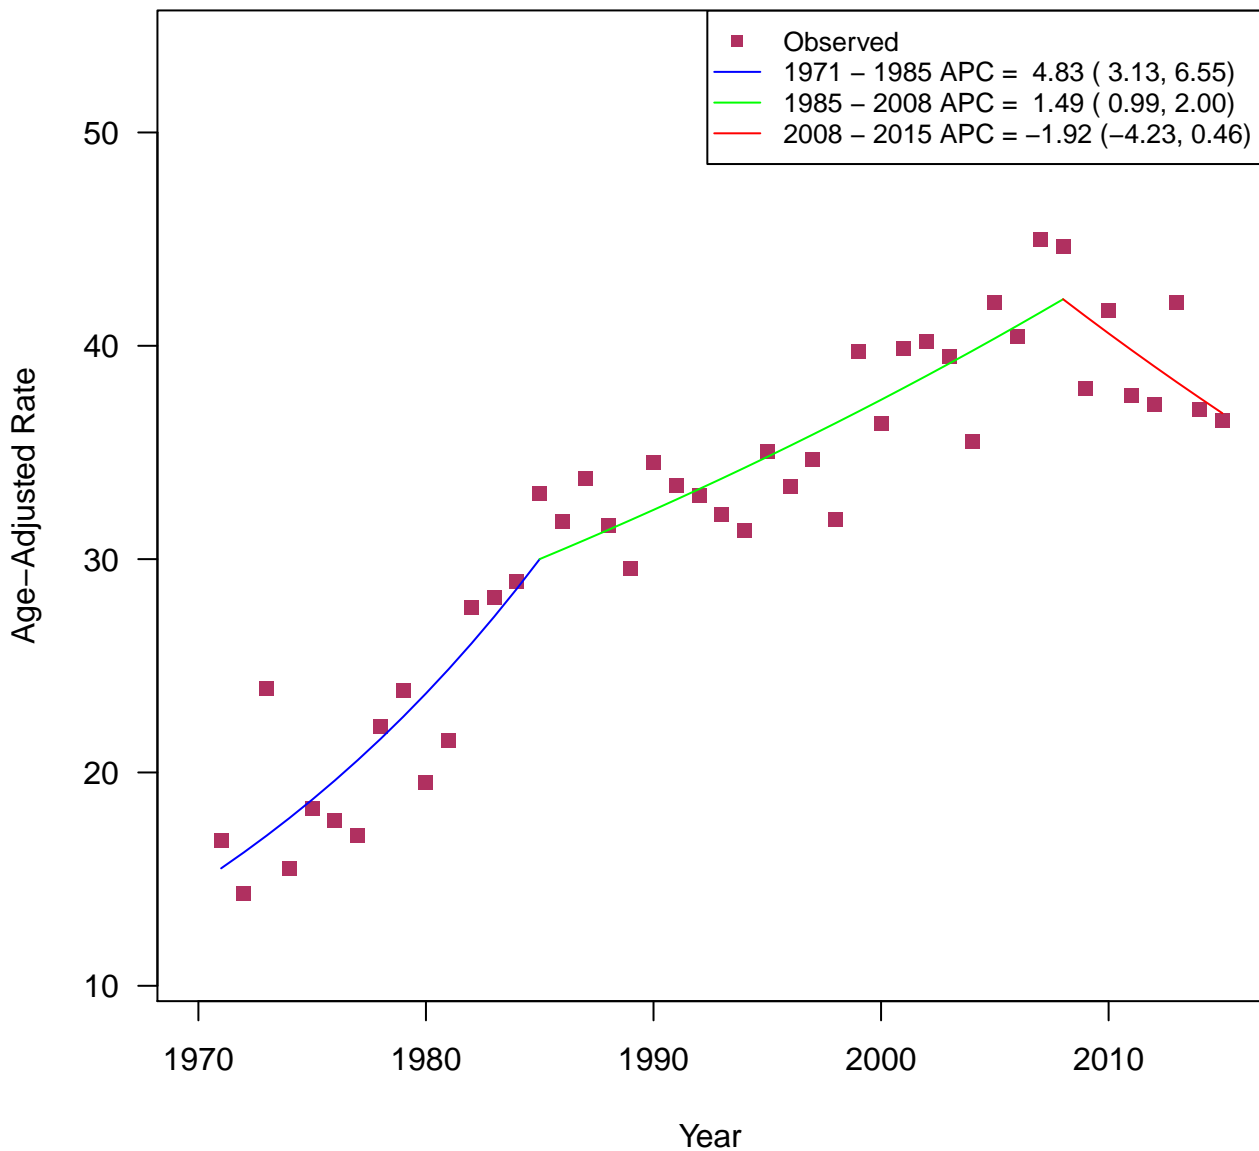

**Figure 190. Age-adjusted incidence rates of kidney cancer in females aged 80–89 years in Canada, 1971–2015**

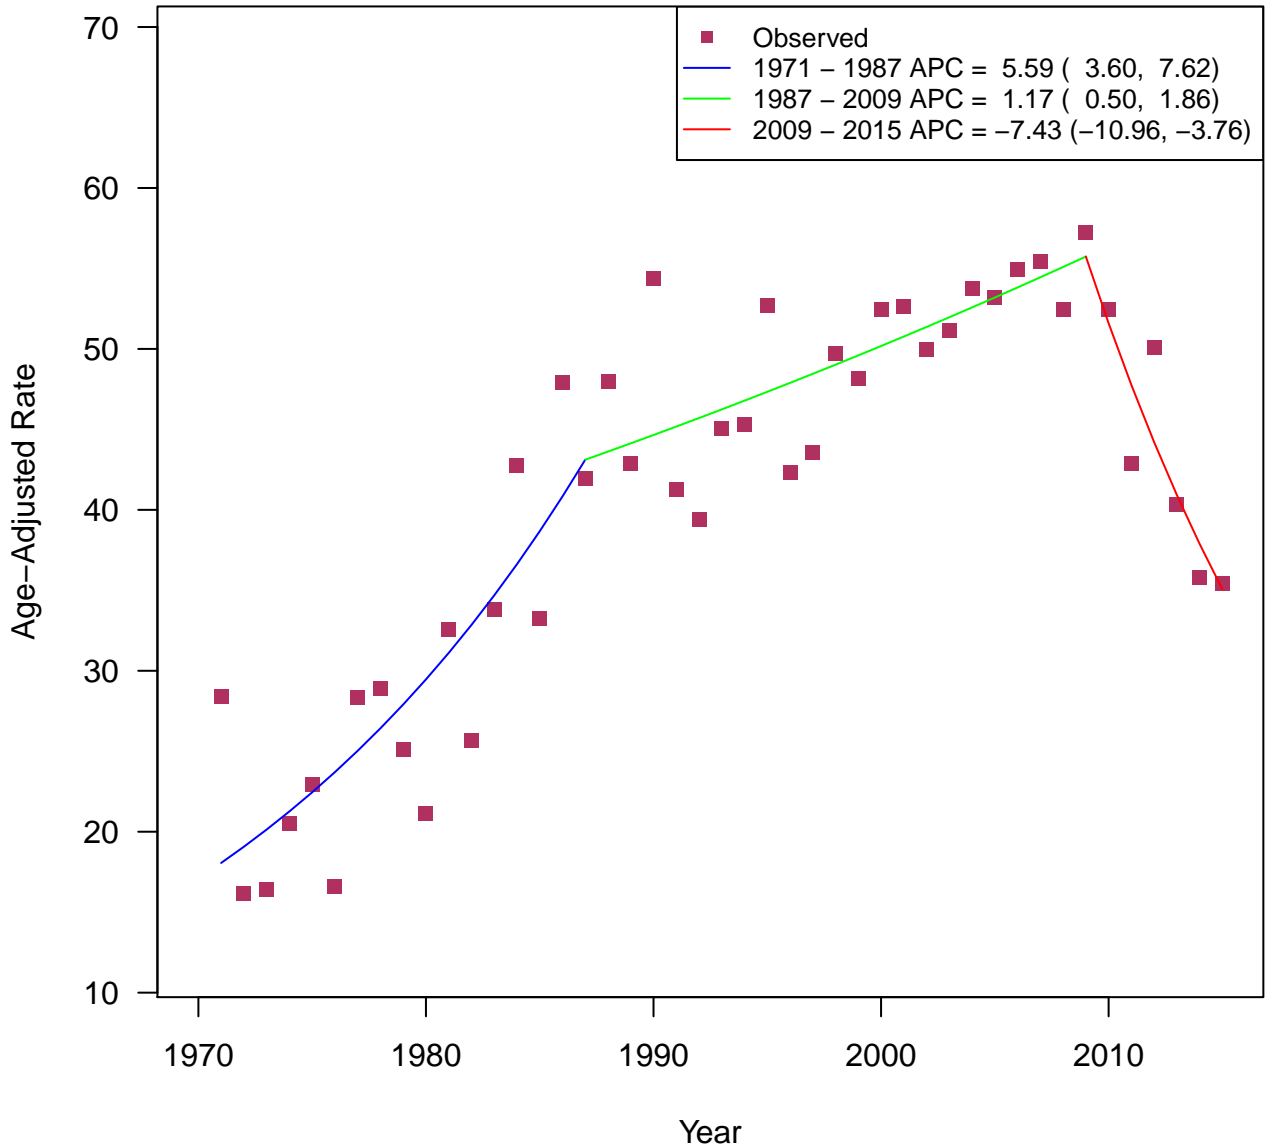

**Figure 191. Age-adjusted incidence rates of laryngeal cancer in males aged 20–29 years in Canada, 1971–2015**

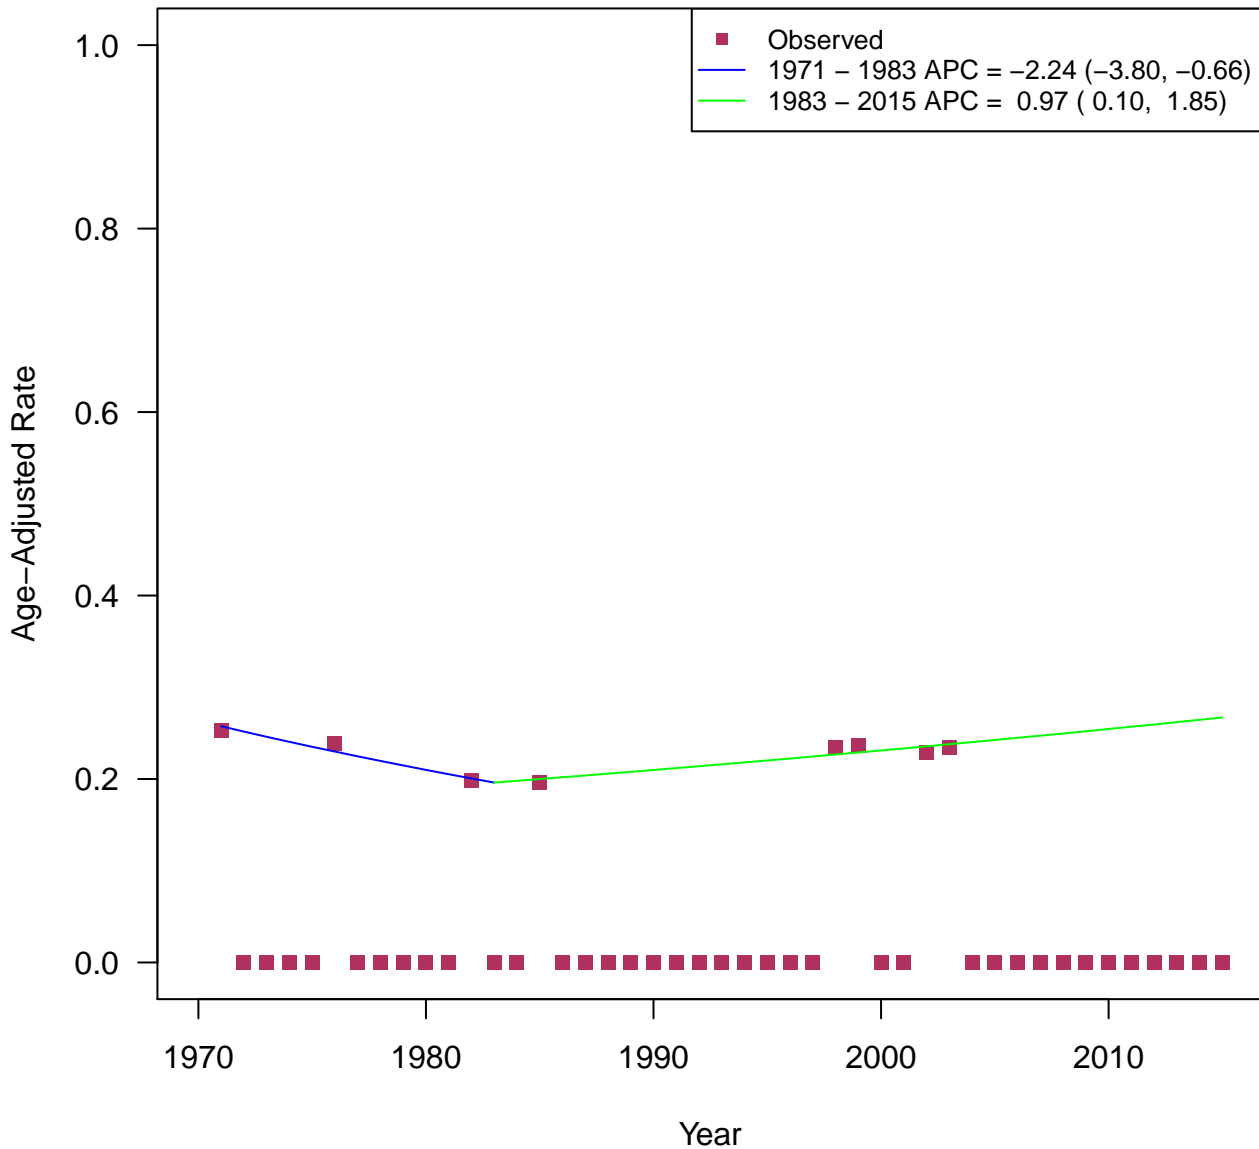

**Figure 192. Age-adjusted incidence rates of laryngeal cancer in males aged 20–39 years in Canada, 1971–2015**

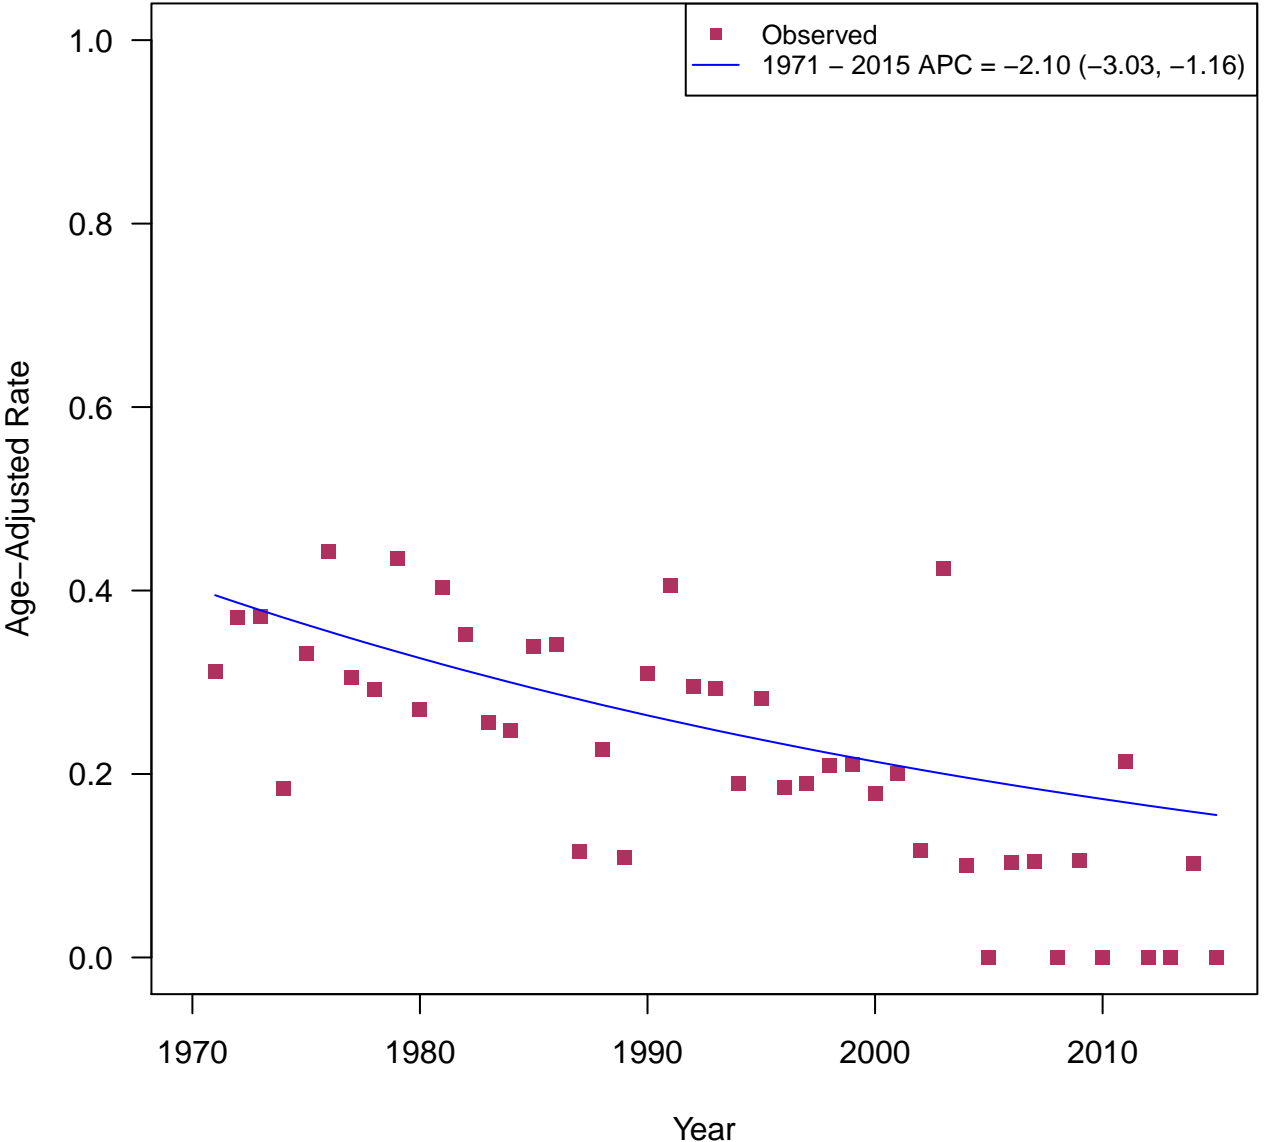

**Figure 193. Age-adjusted incidence rates of laryngeal cancer in males aged 20–49 years in Canada, 1971–2015**

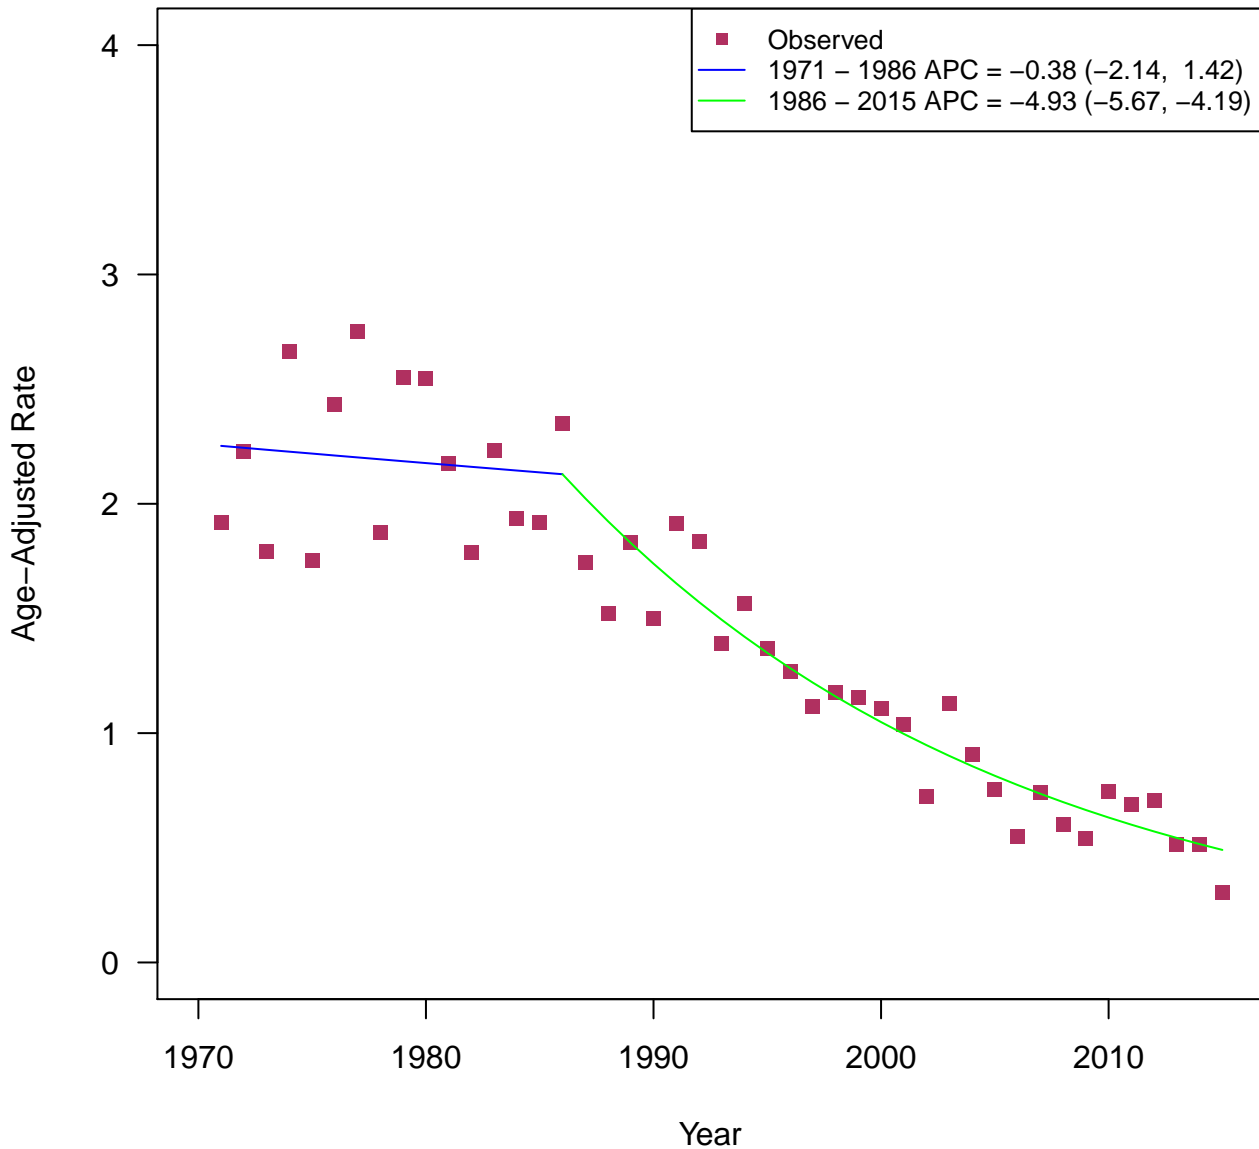

**Figure 194. Age-adjusted incidence rates of laryngeal cancer in males aged 30–39 years in Canada, 1971–2015**

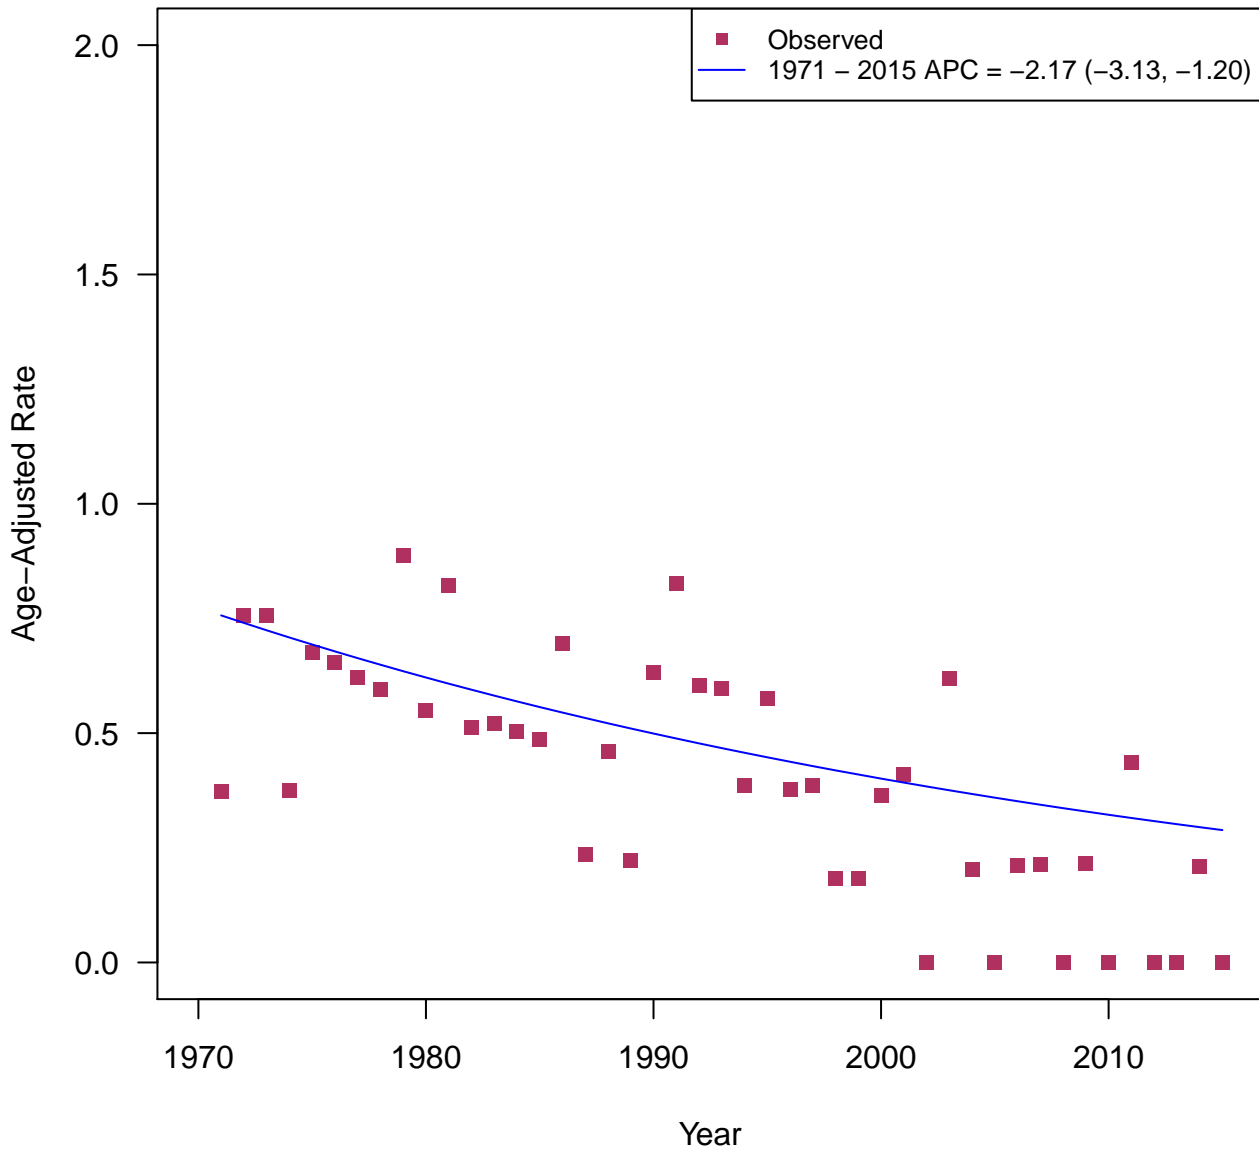

**Figure 195. Age-adjusted incidence rates of laryngeal cancer in males aged 40–49 years in Canada, 1971–2015**

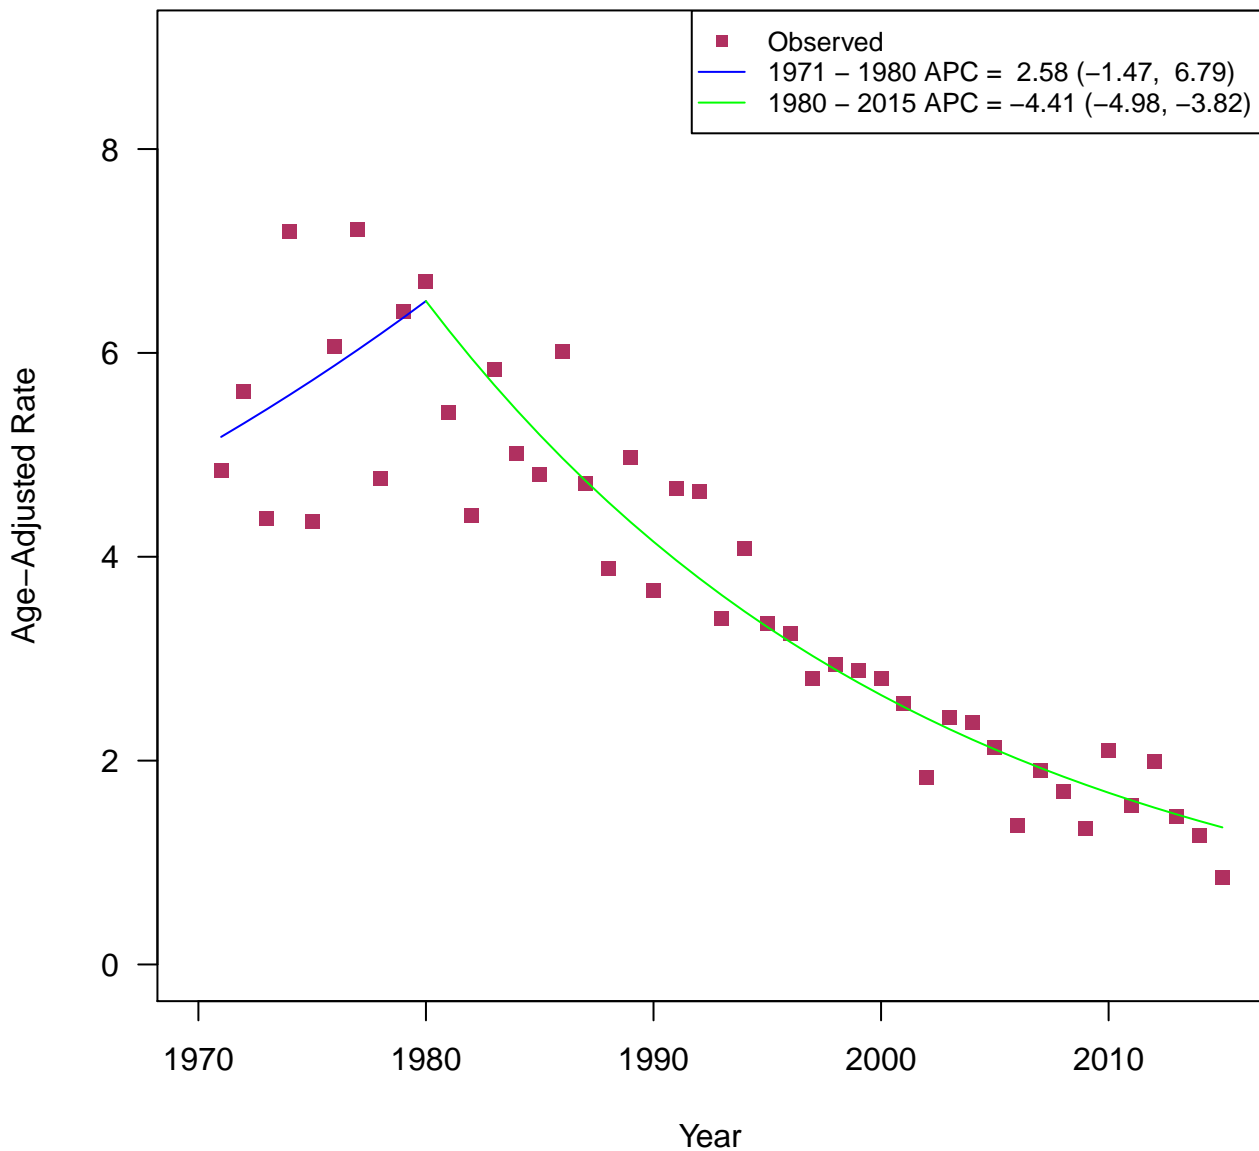



**Figure 196. Age-adjusted incidence rates of laryngeal cancer in males aged 50–59 years in Canada, 1971–2015**

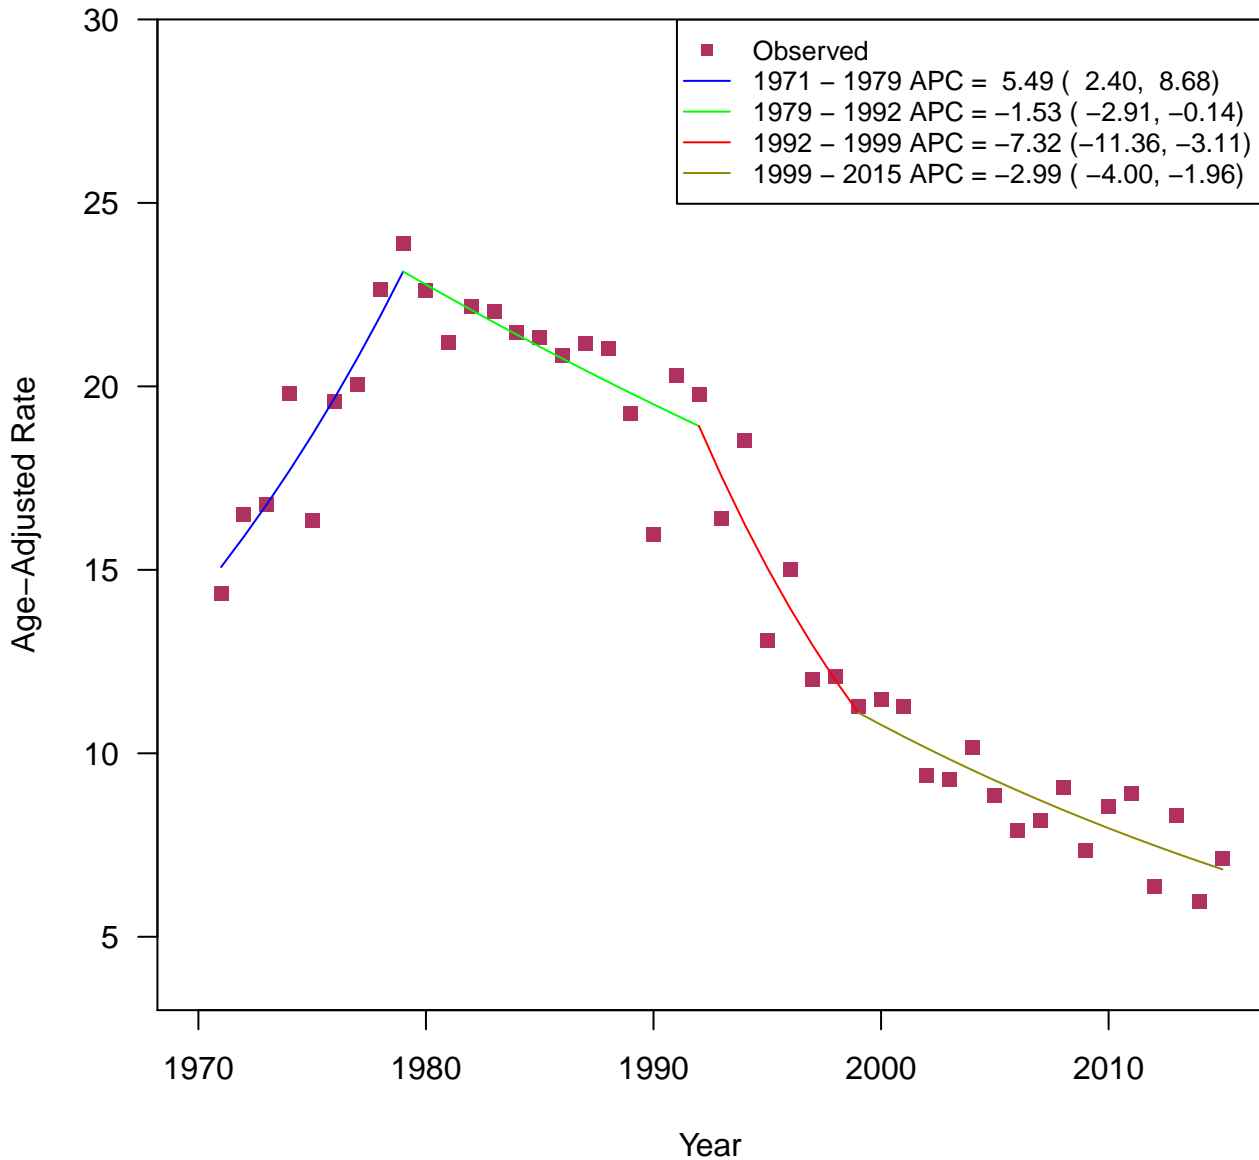

**Figure 197. Age-adjusted incidence rates of laryngeal cancer in males aged 60–69 years in Canada, 1971–2015**

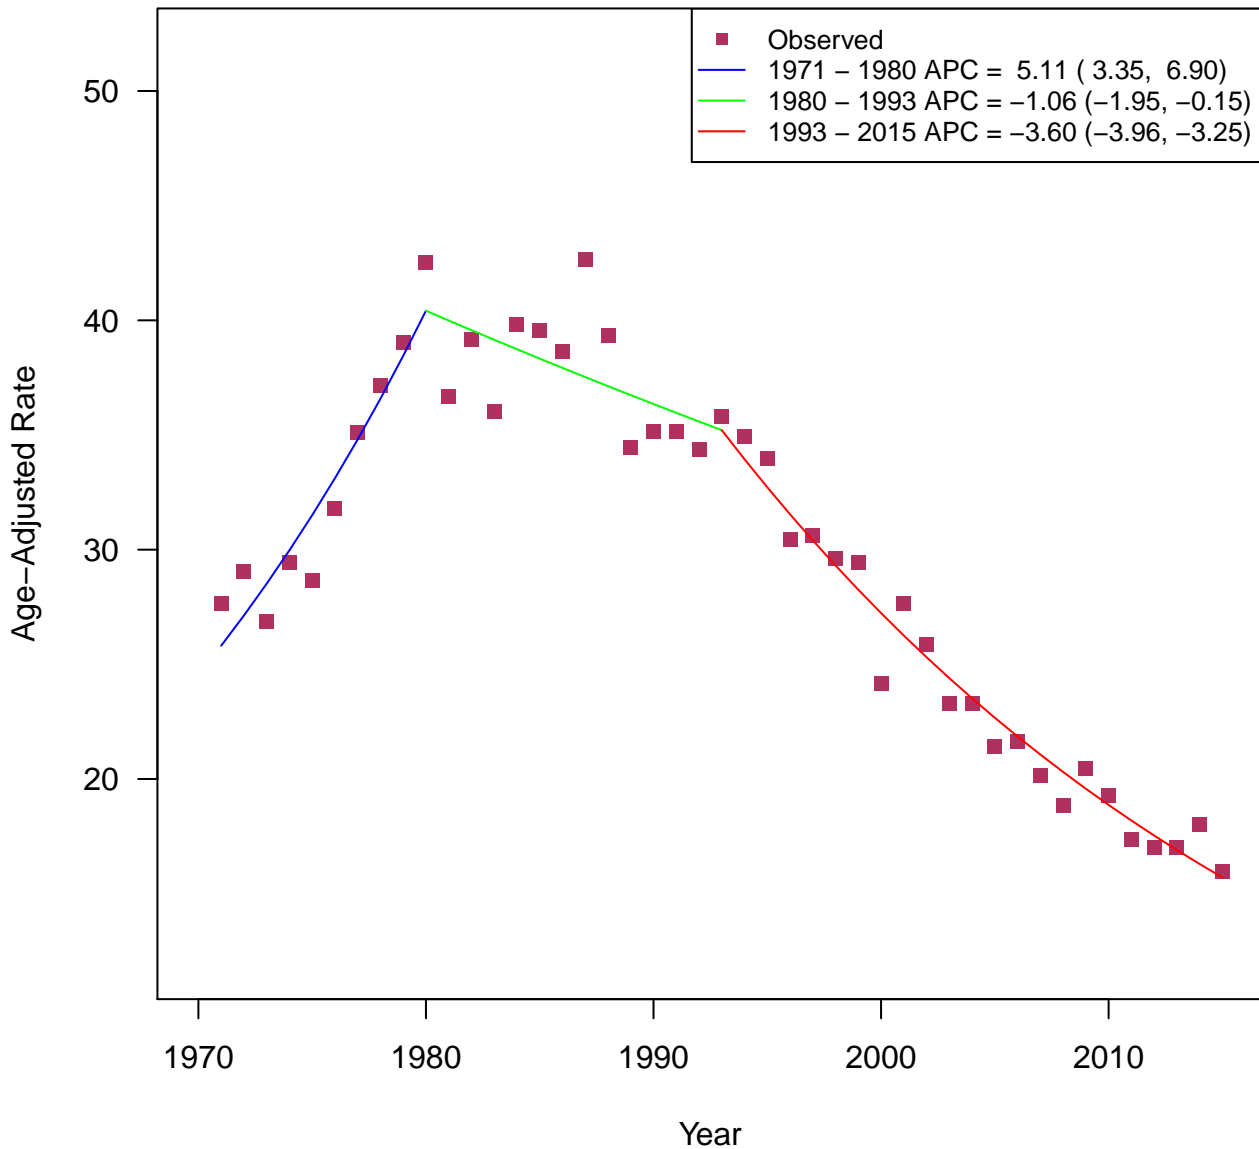

**Figure 198. Age-adjusted incidence rates of laryngeal cancer in males aged 70–79 years in Canada, 1971–2015**

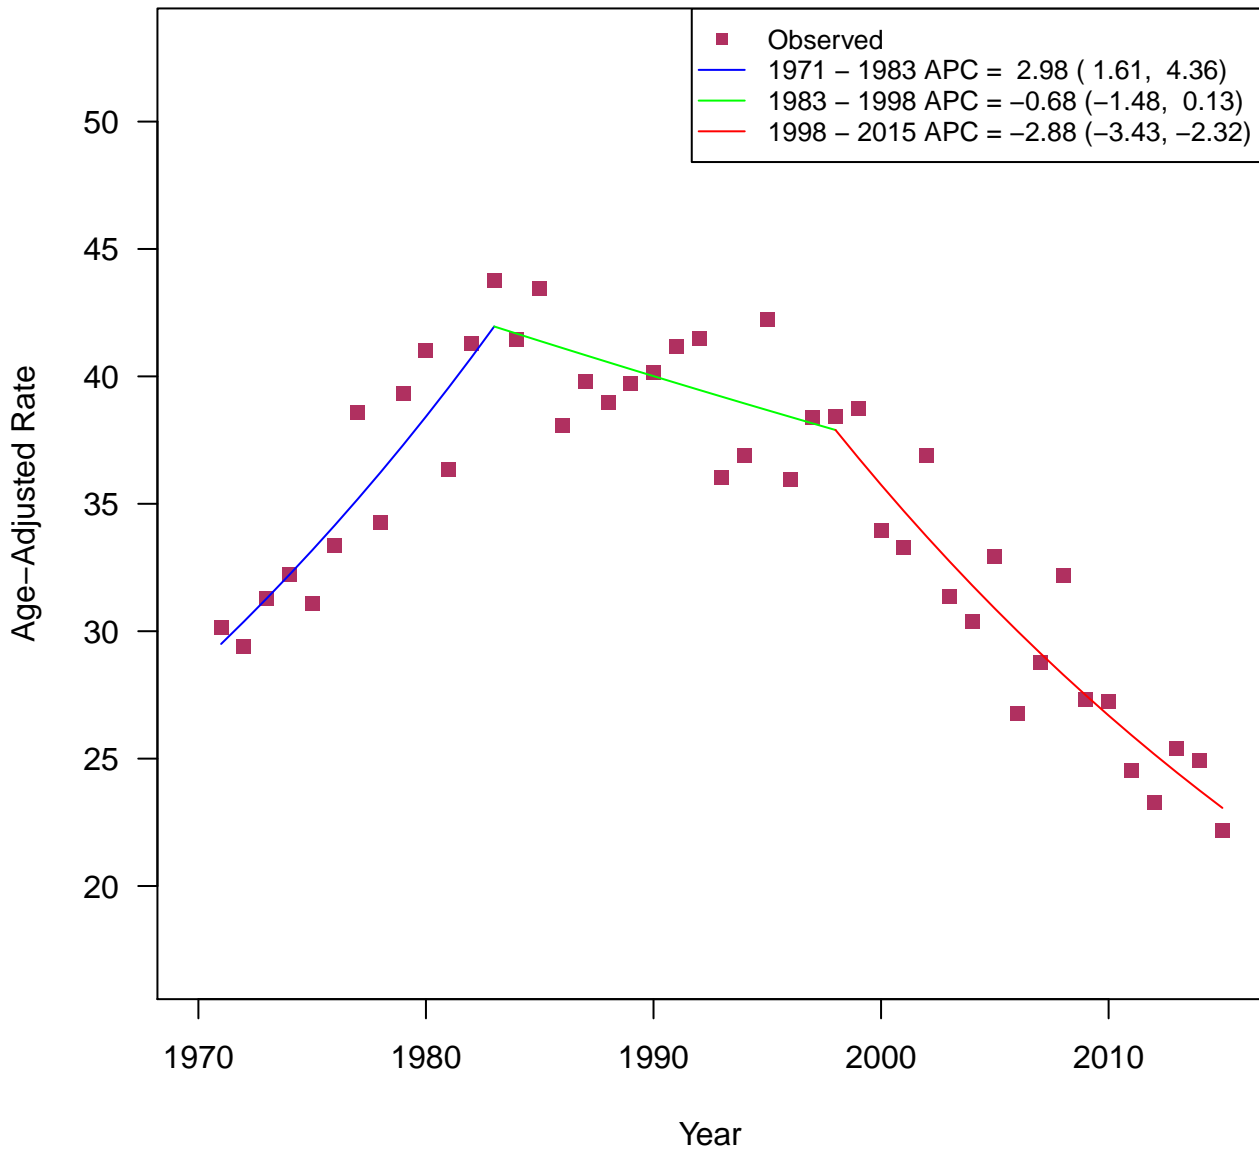

**Figure 199. Age-adjusted incidence rates of laryngeal cancer in males aged 80–89 years in Canada, 1971–2015**

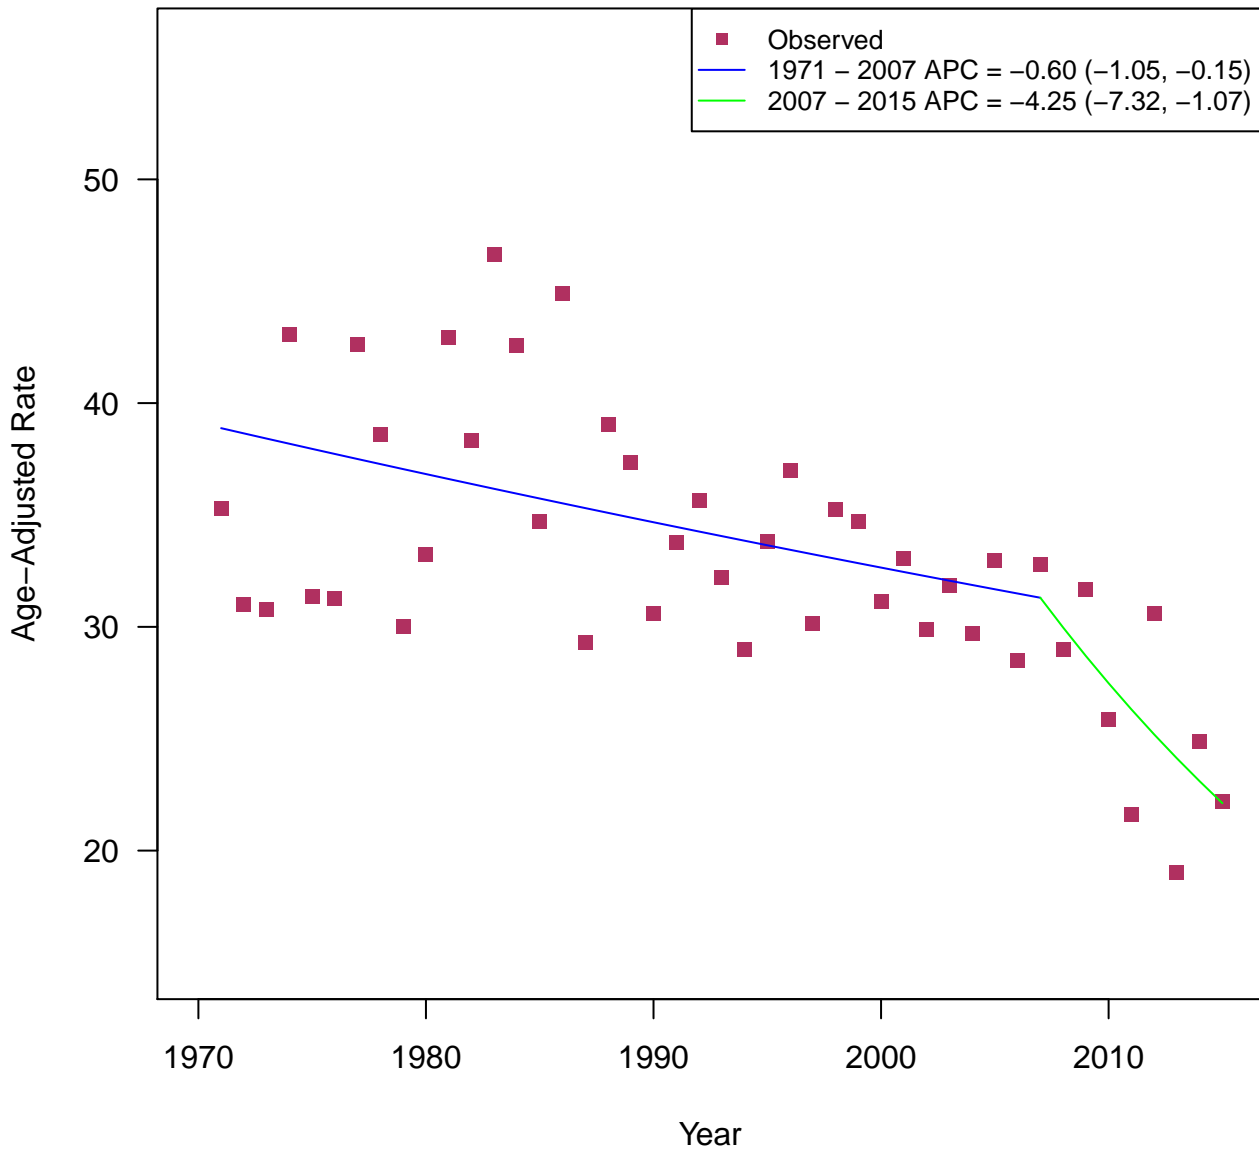

**Figure 200. Age-adjusted incidence rates of laryngeal cancer in females aged 20–29 years in Canada, 1971–2015**

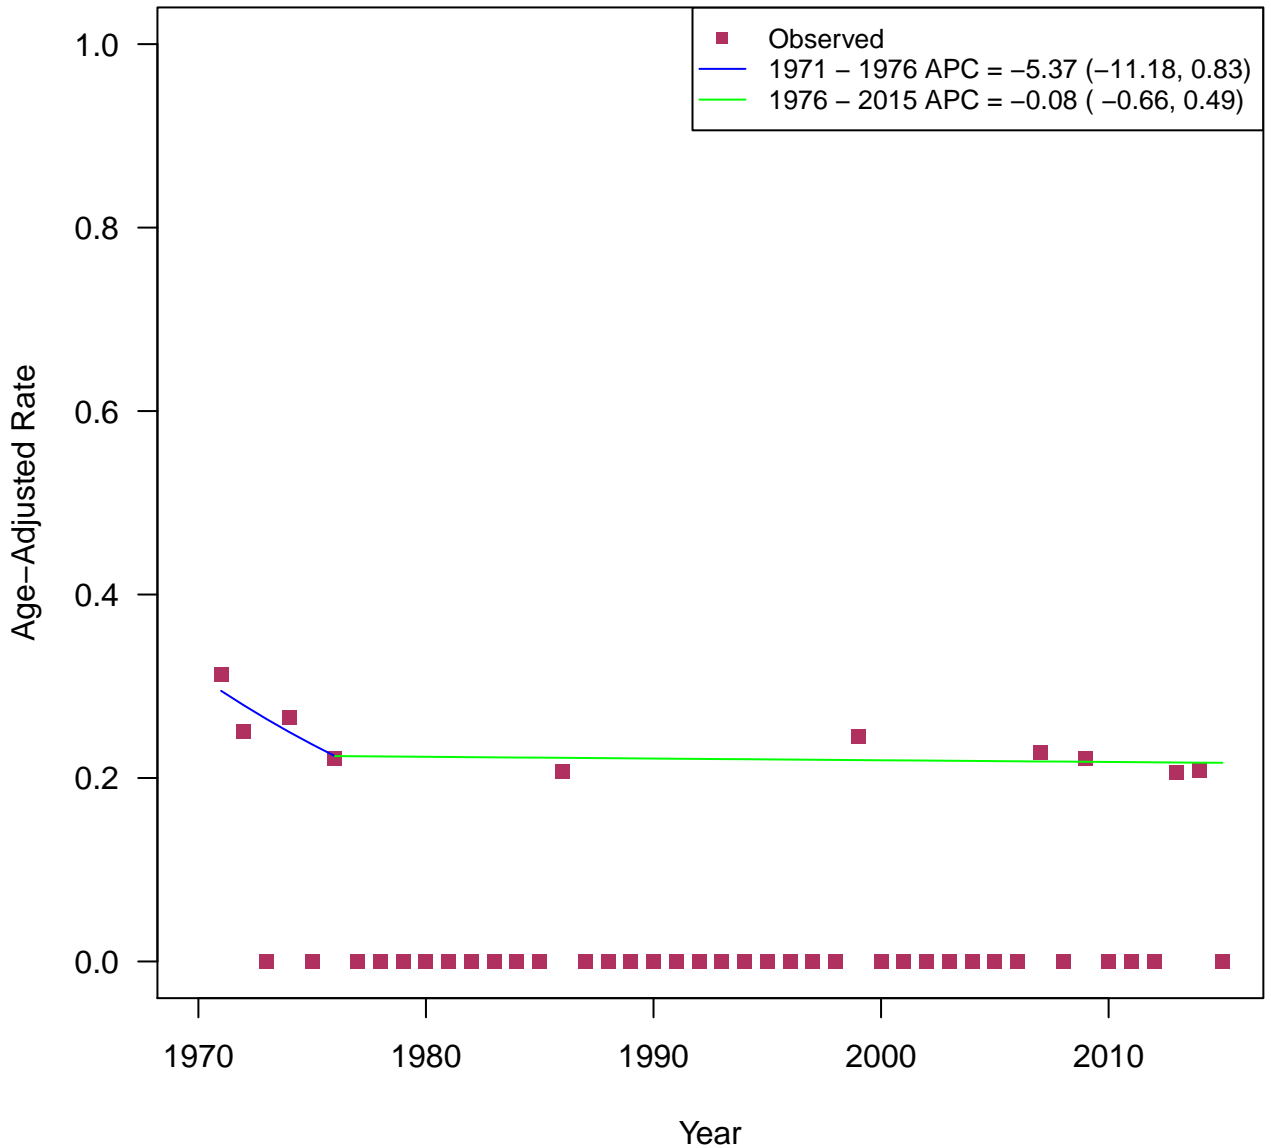

**Figure 201. Age-adjusted incidence rates of laryngeal cancer in females aged 20–39 years in Canada, 1971–2015**

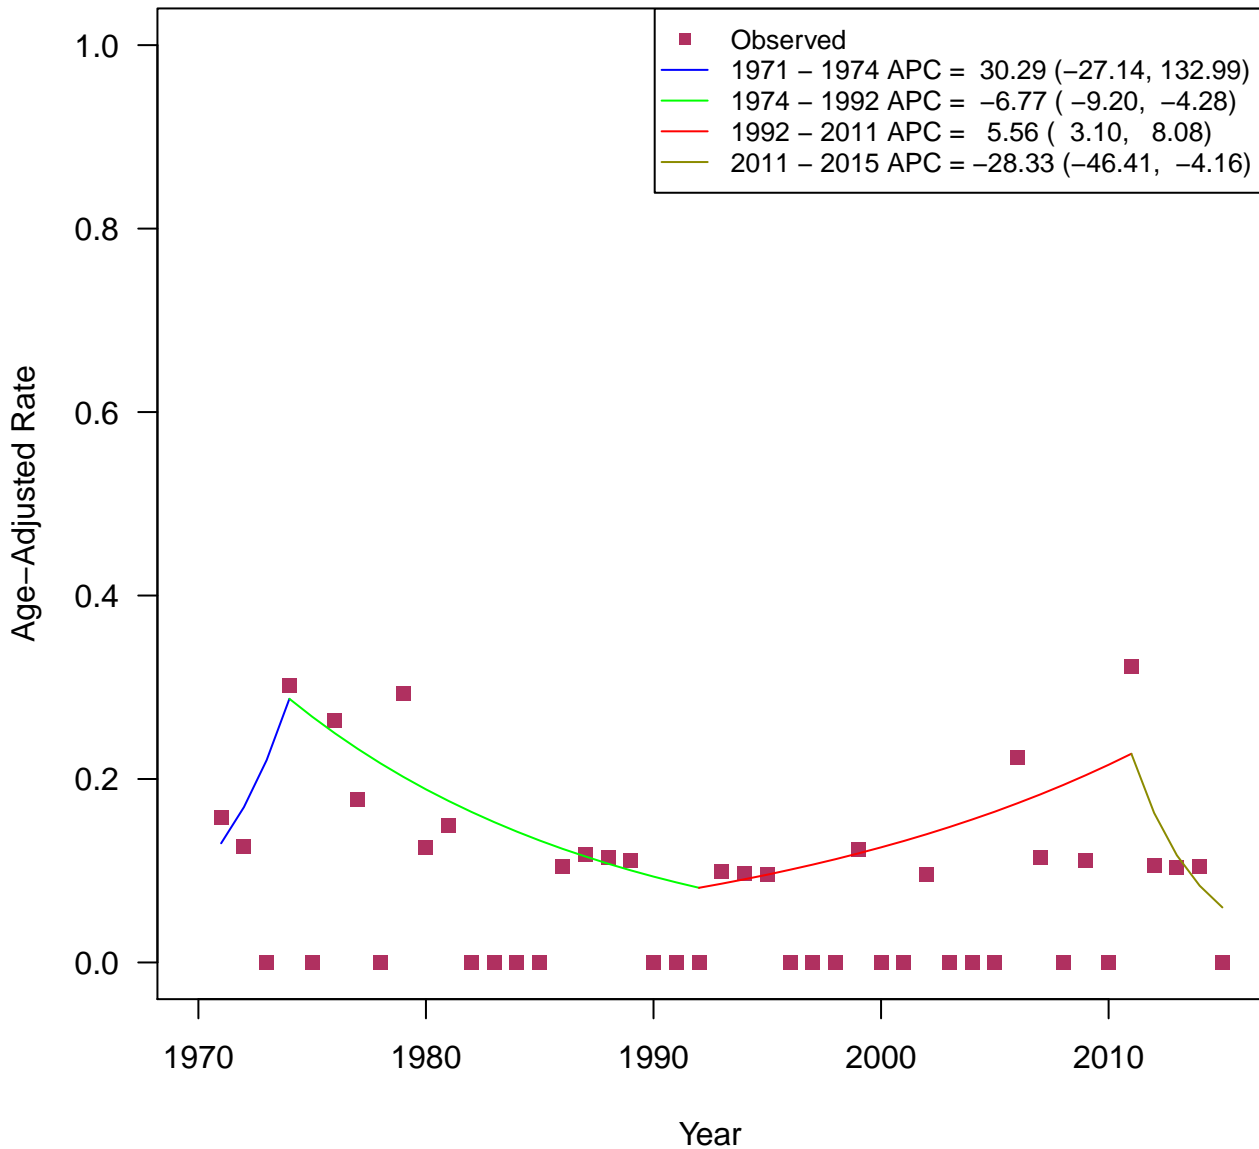

**Figure 202. Age-adjusted incidence rates of laryngeal cancer in females aged 20–49 years in Canada, 1971–2015**

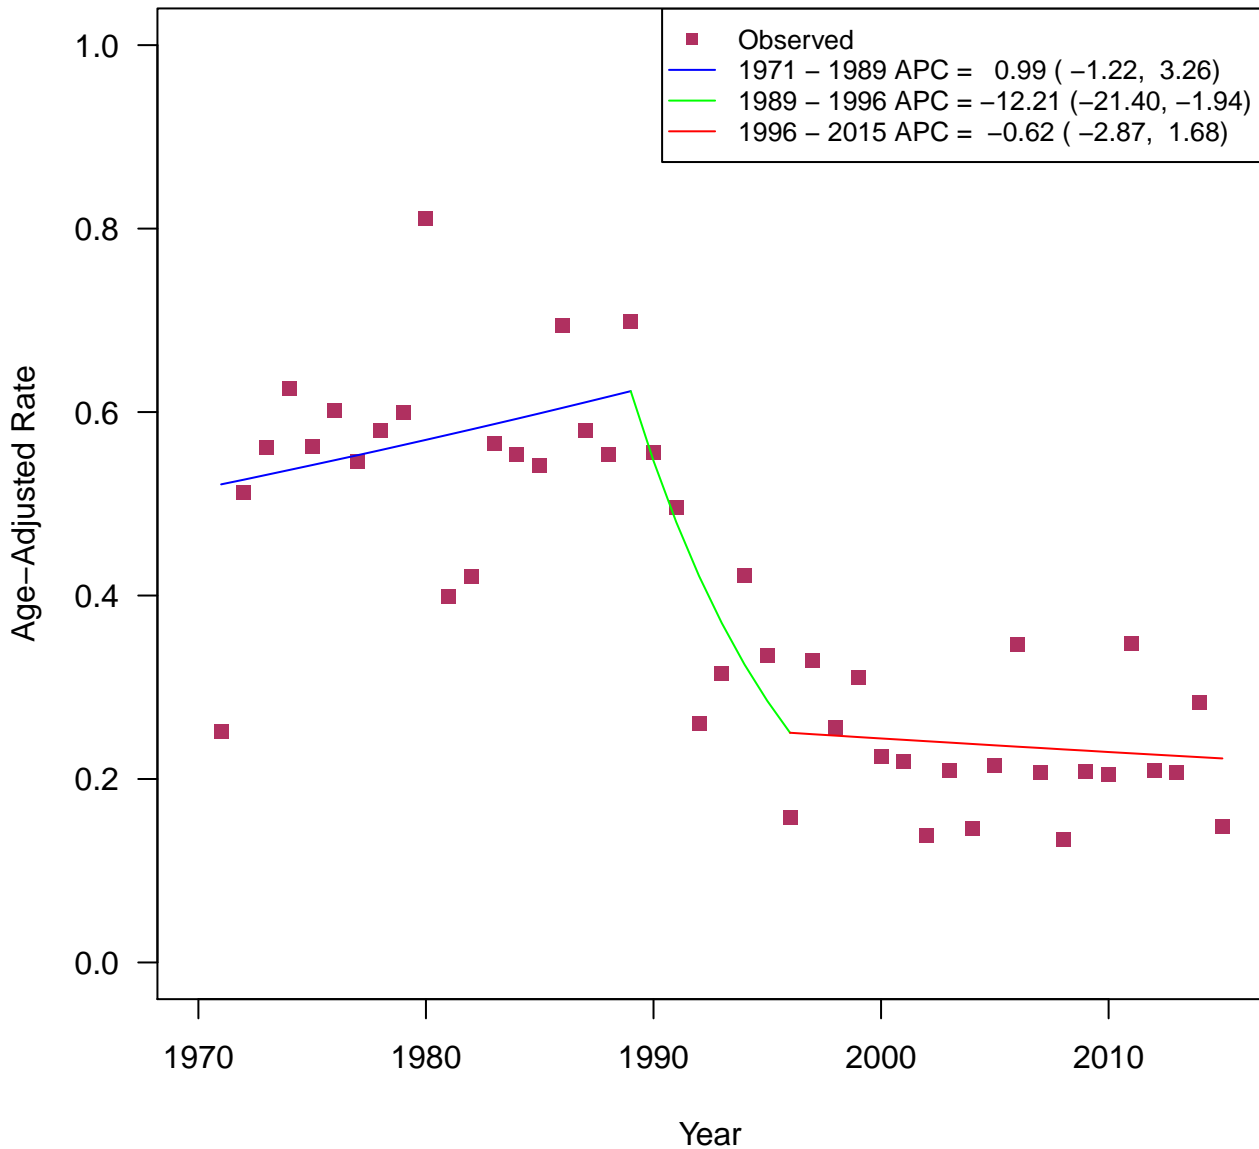

**Figure 203. Age-adjusted incidence rates of laryngeal cancer in females aged 30–39 years in Canada, 1971–2015**

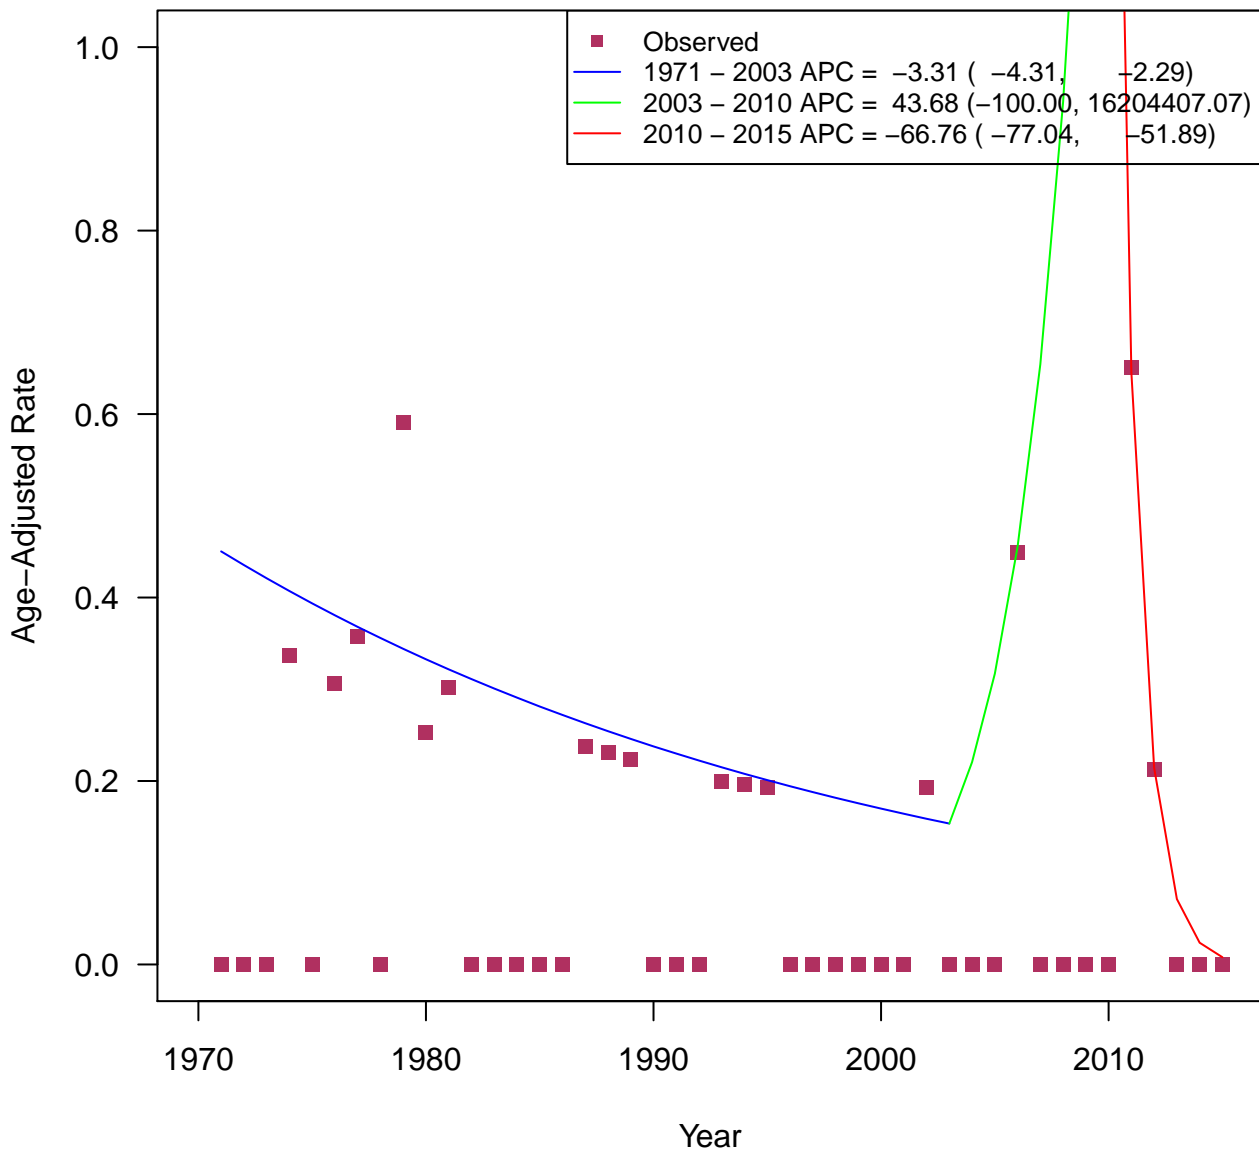



**Figure 204. Age-adjusted incidence rates of laryngeal cancer in females aged 40–49 years in Canada, 1971–2015**

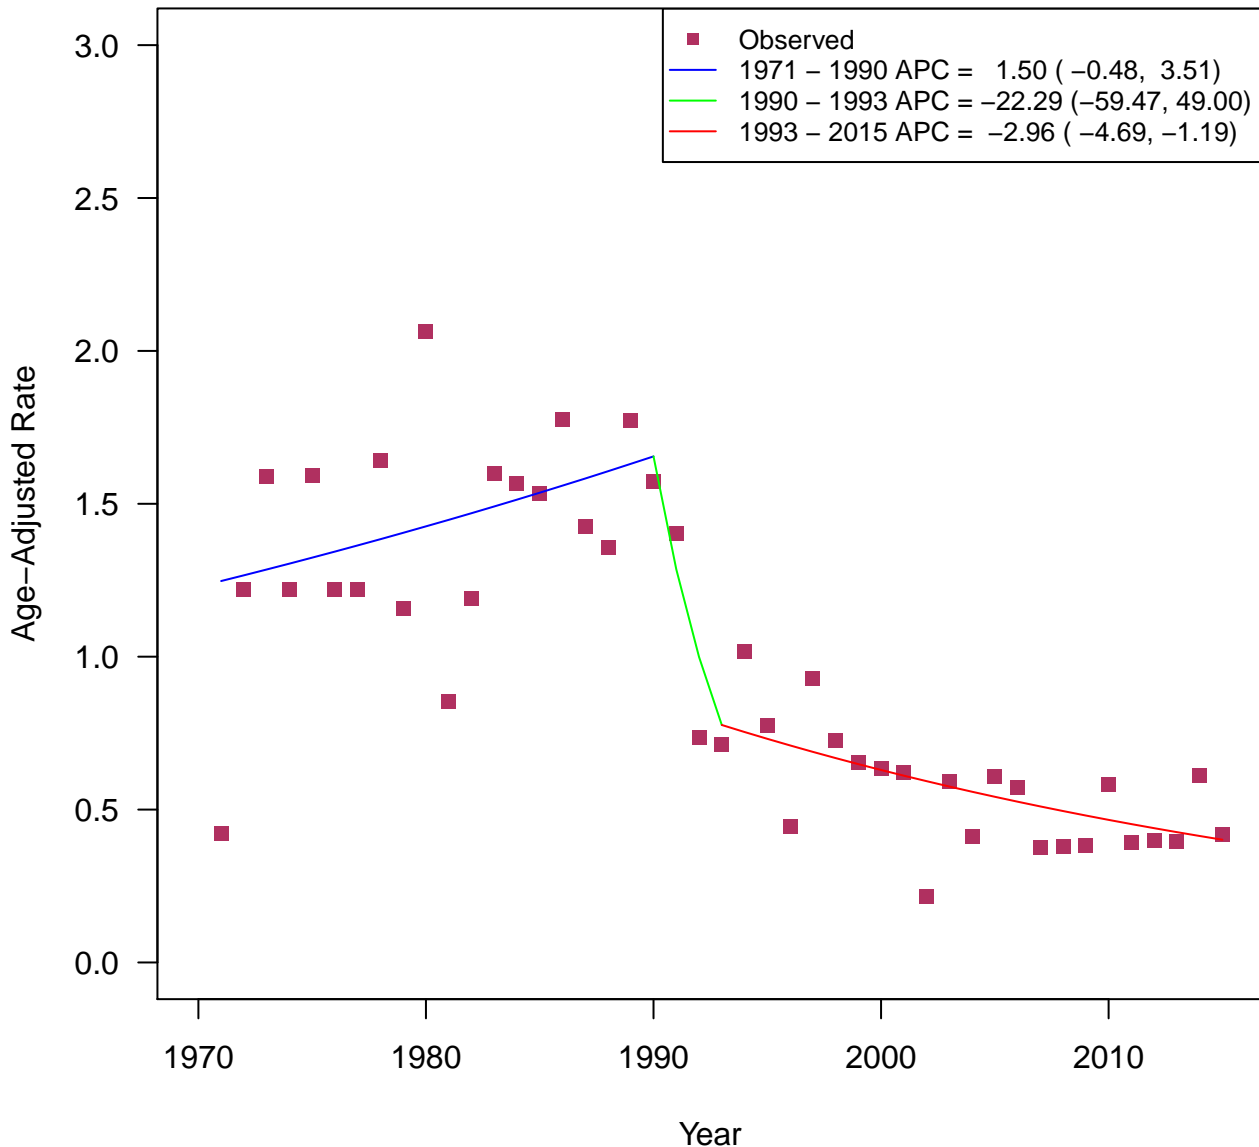

**Figure 205. Age-adjusted incidence rates of laryngeal cancer in females aged 50–59 years in Canada, 1971–2015**

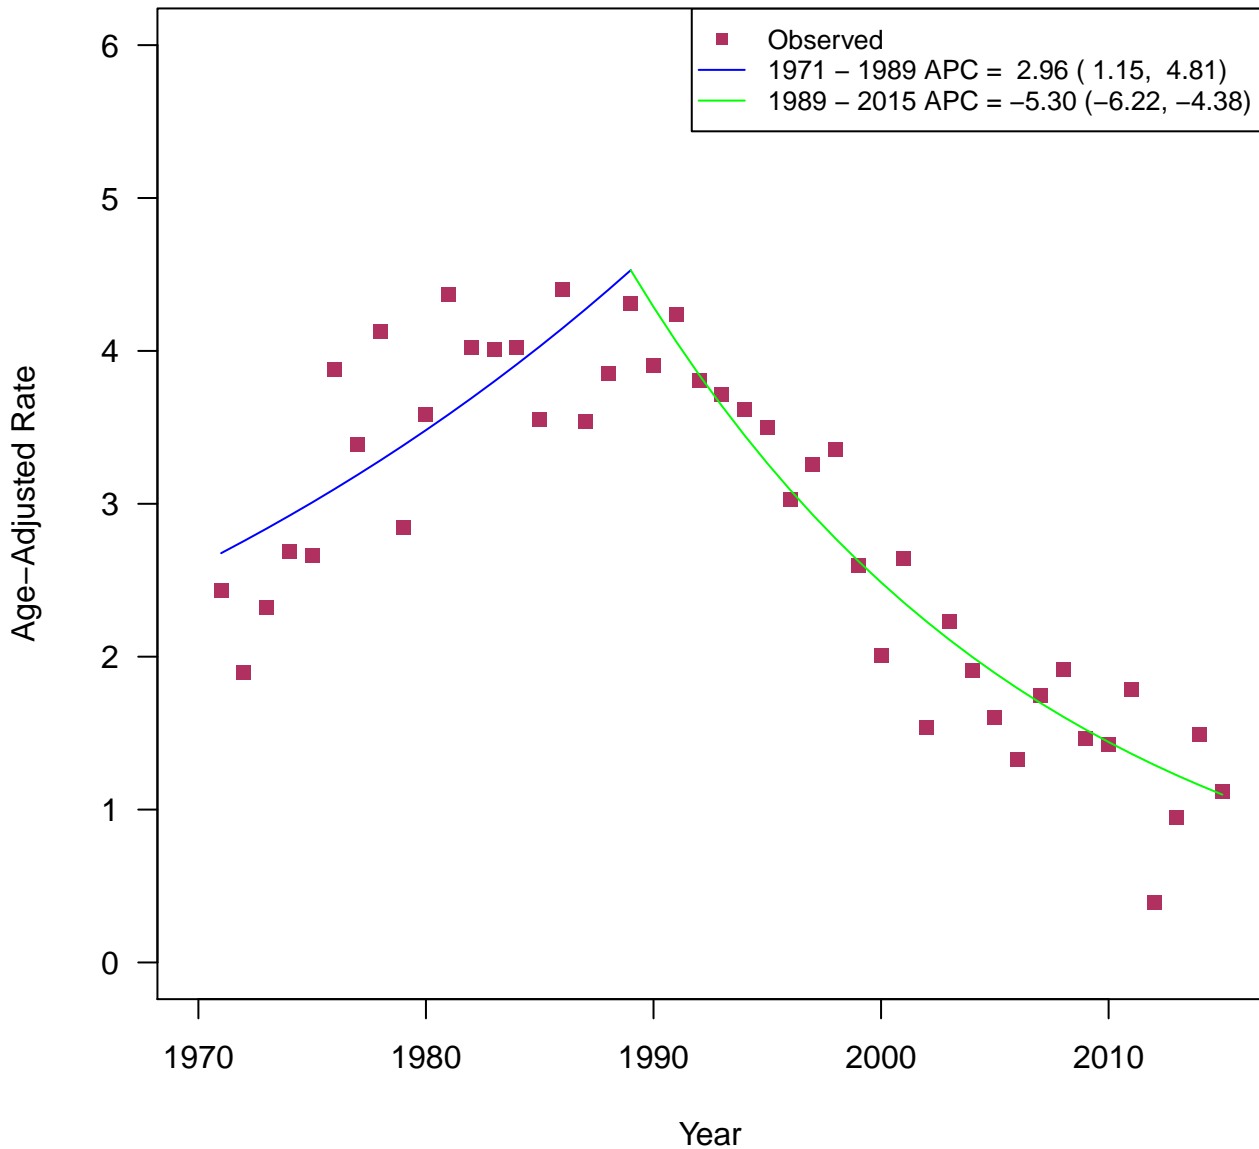

**Figure 206. Age-adjusted incidence rates of laryngeal cancer in females aged 60–69 years in Canada, 1971–2015**

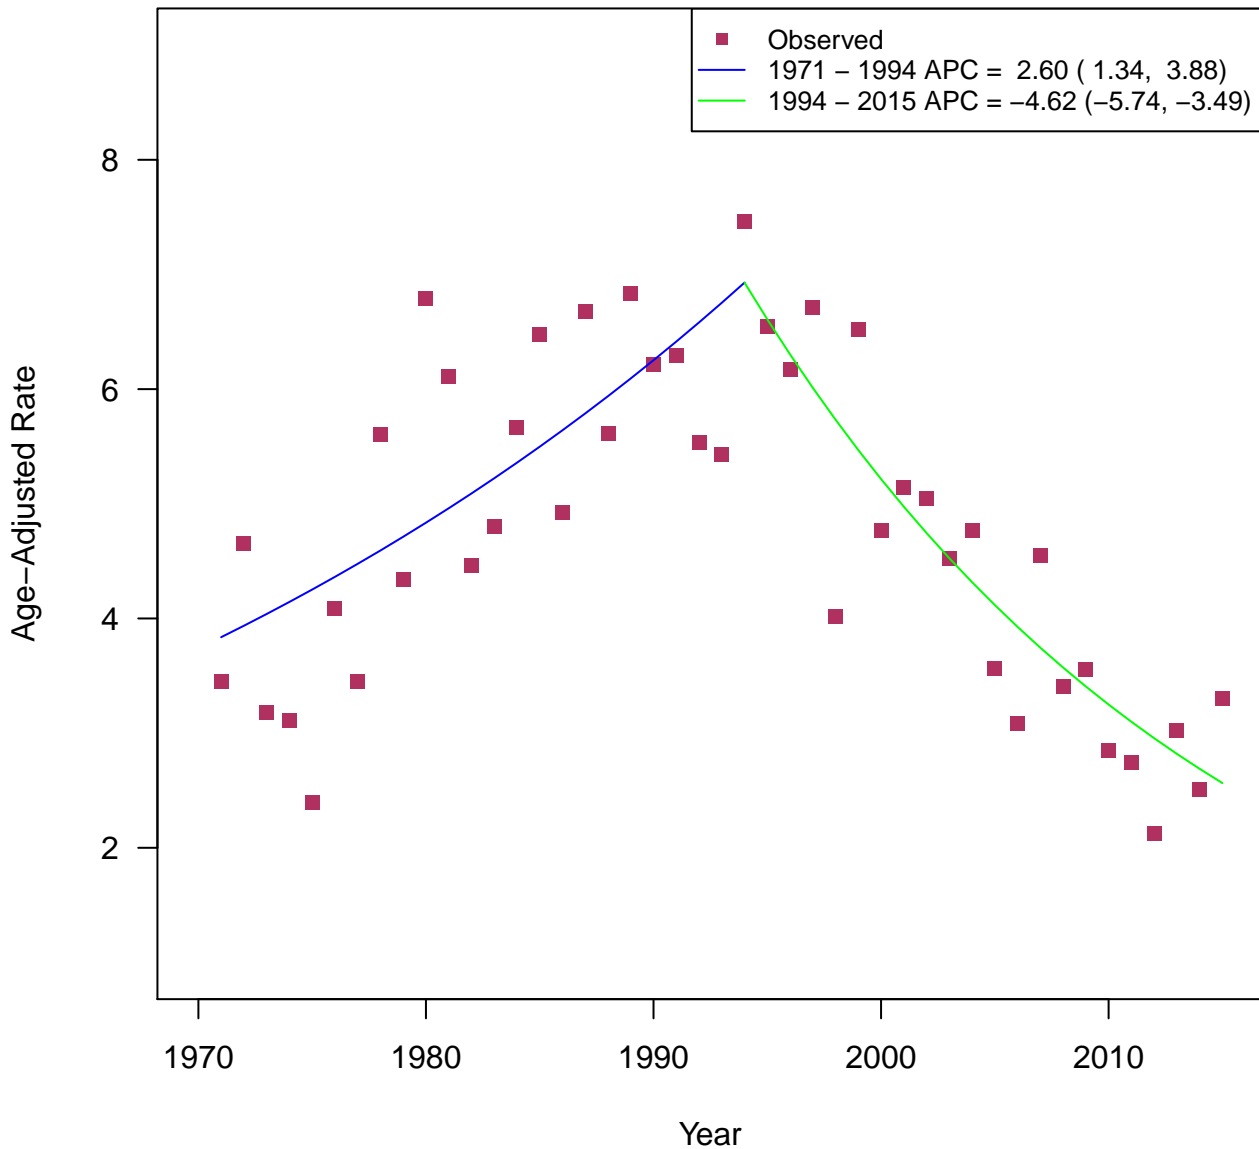

**Figure 207. Age-adjusted incidence rates of laryngeal cancer in females aged 70–79 years in Canada, 1971–2015**

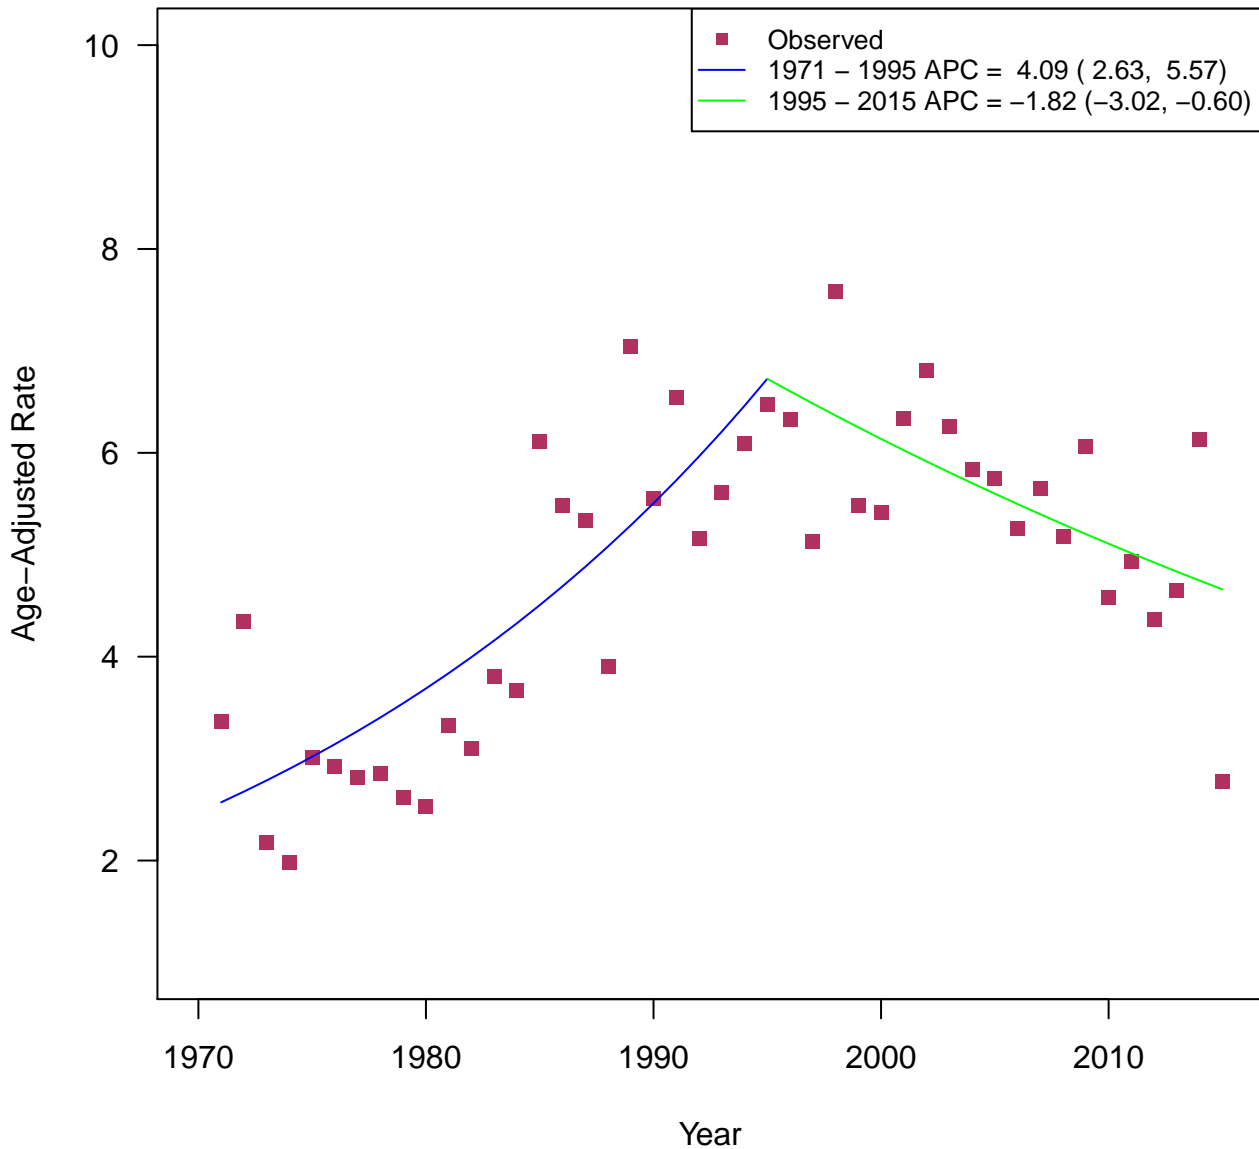

**Figure 208. Age-adjusted incidence rates of laryngeal cancer in females aged 80–89 years in Canada, 1971–2015**

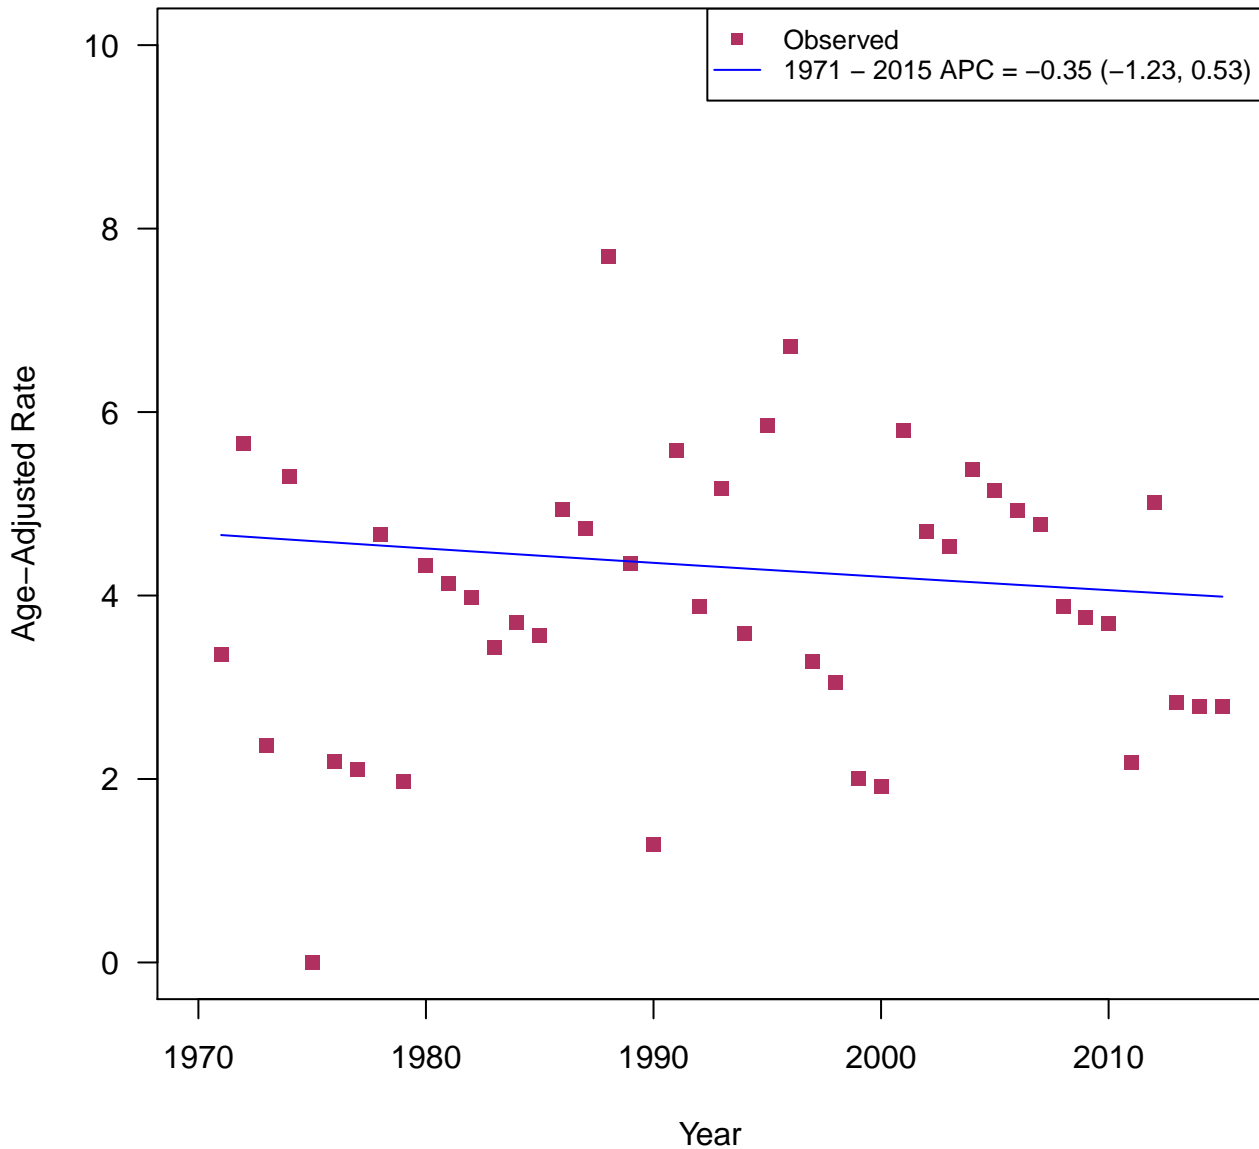

**Figure 209. Age-adjusted incidence rates of liver cancer in males aged 20–29 years in Canada, 1971–2015**

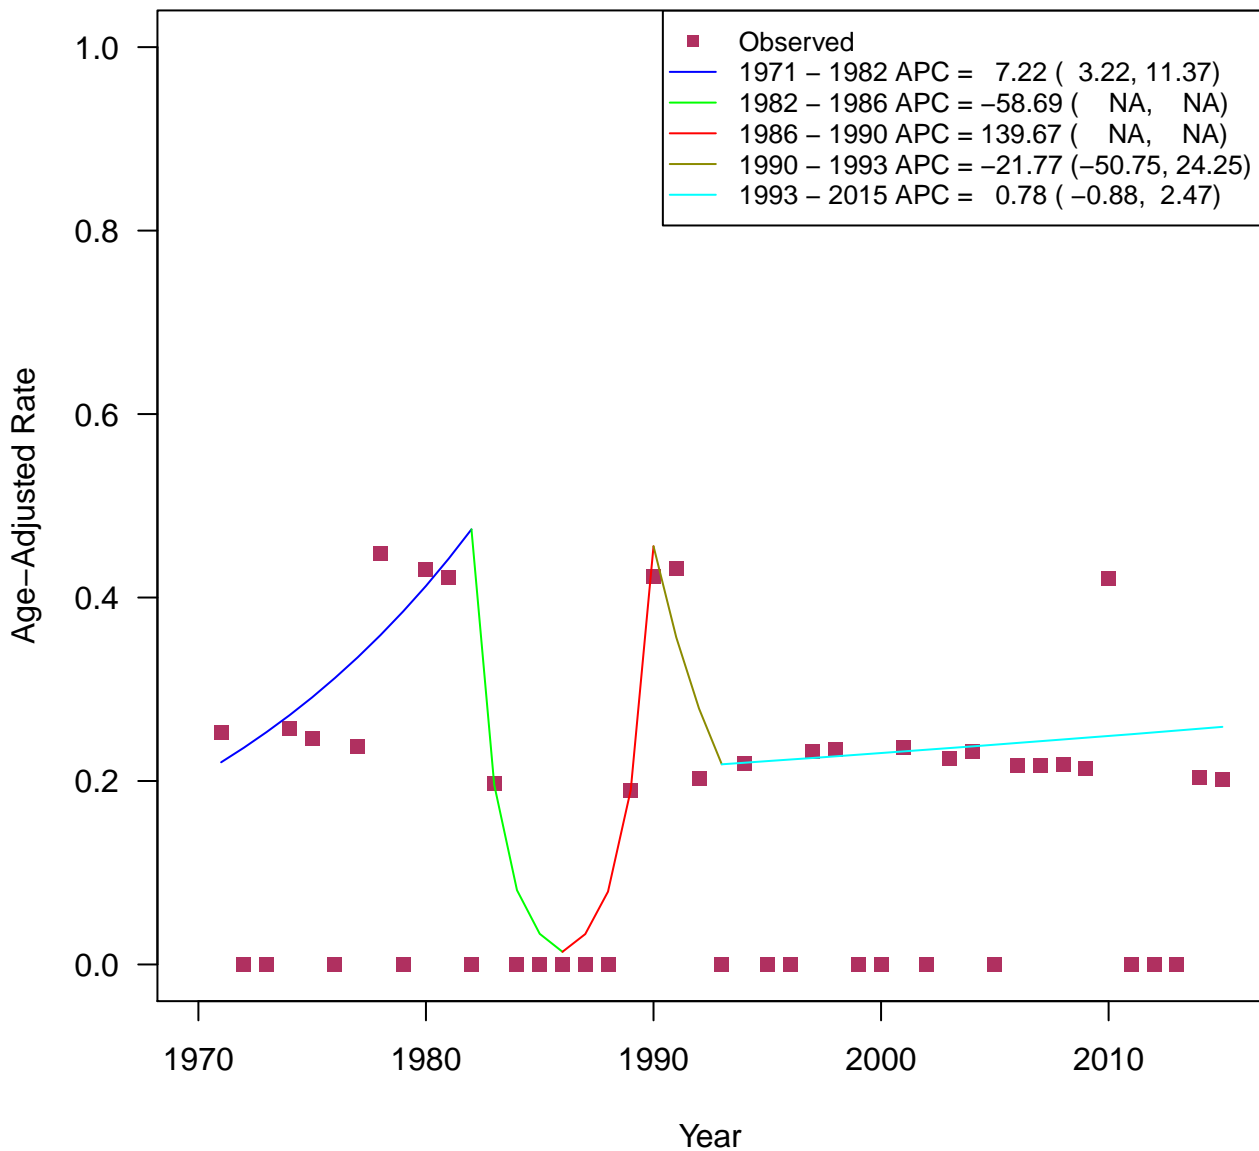

**Figure 210. Age-adjusted incidence rates of liver cancer in males aged 20–39 years in Canada, 1971–2015**

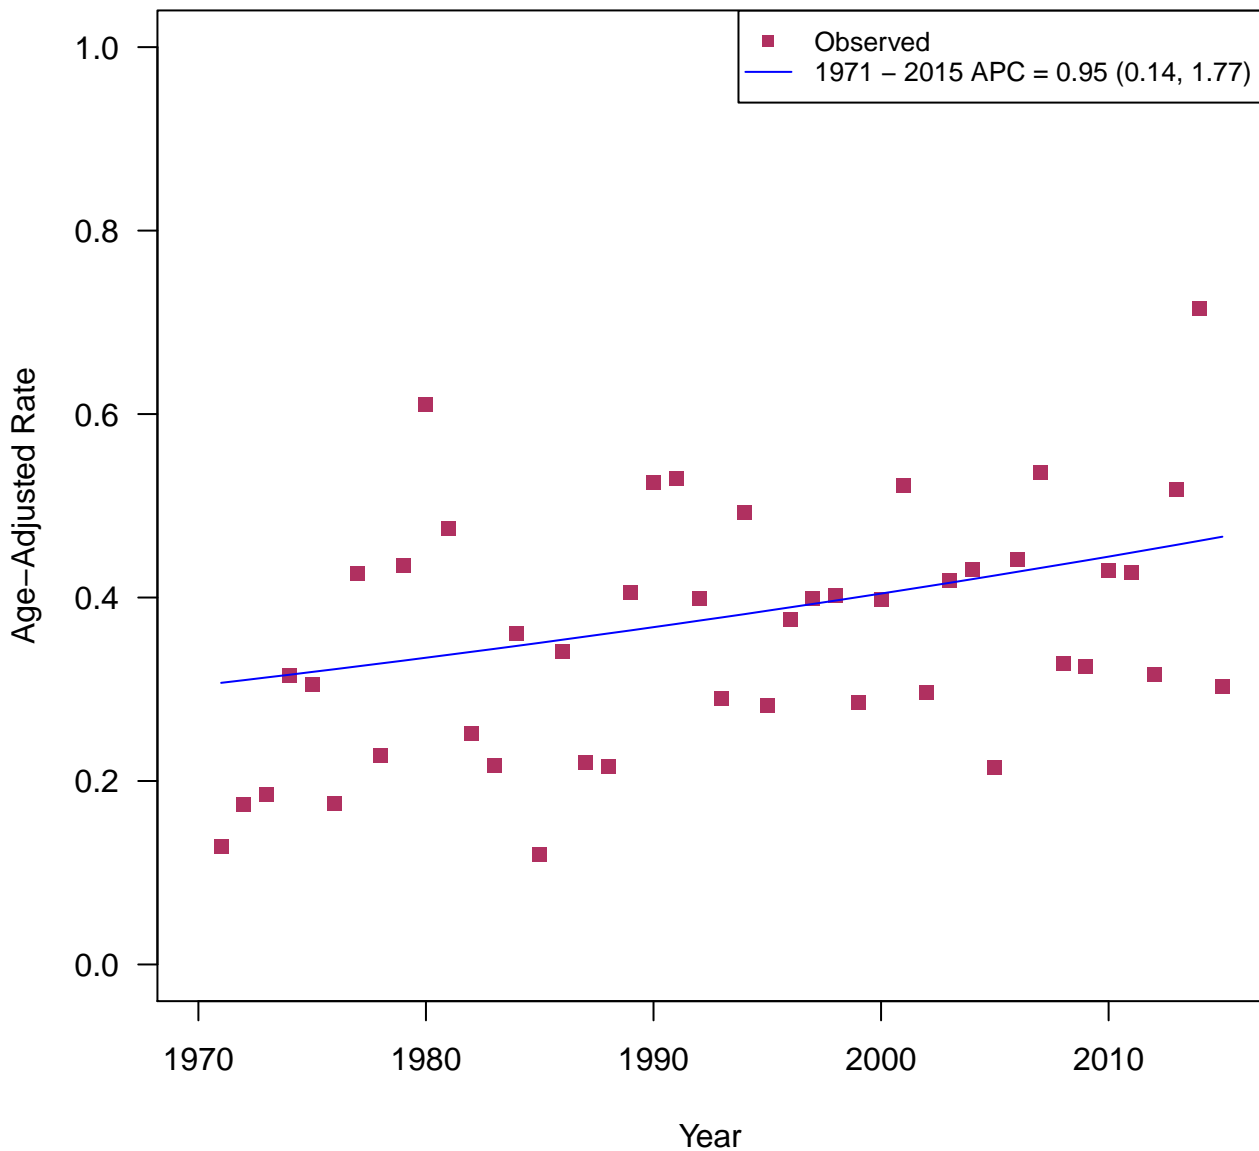

**Figure 211. Age-adjusted incidence rates of liver cancer in males aged 20–49 years in Canada, 1971–2015**

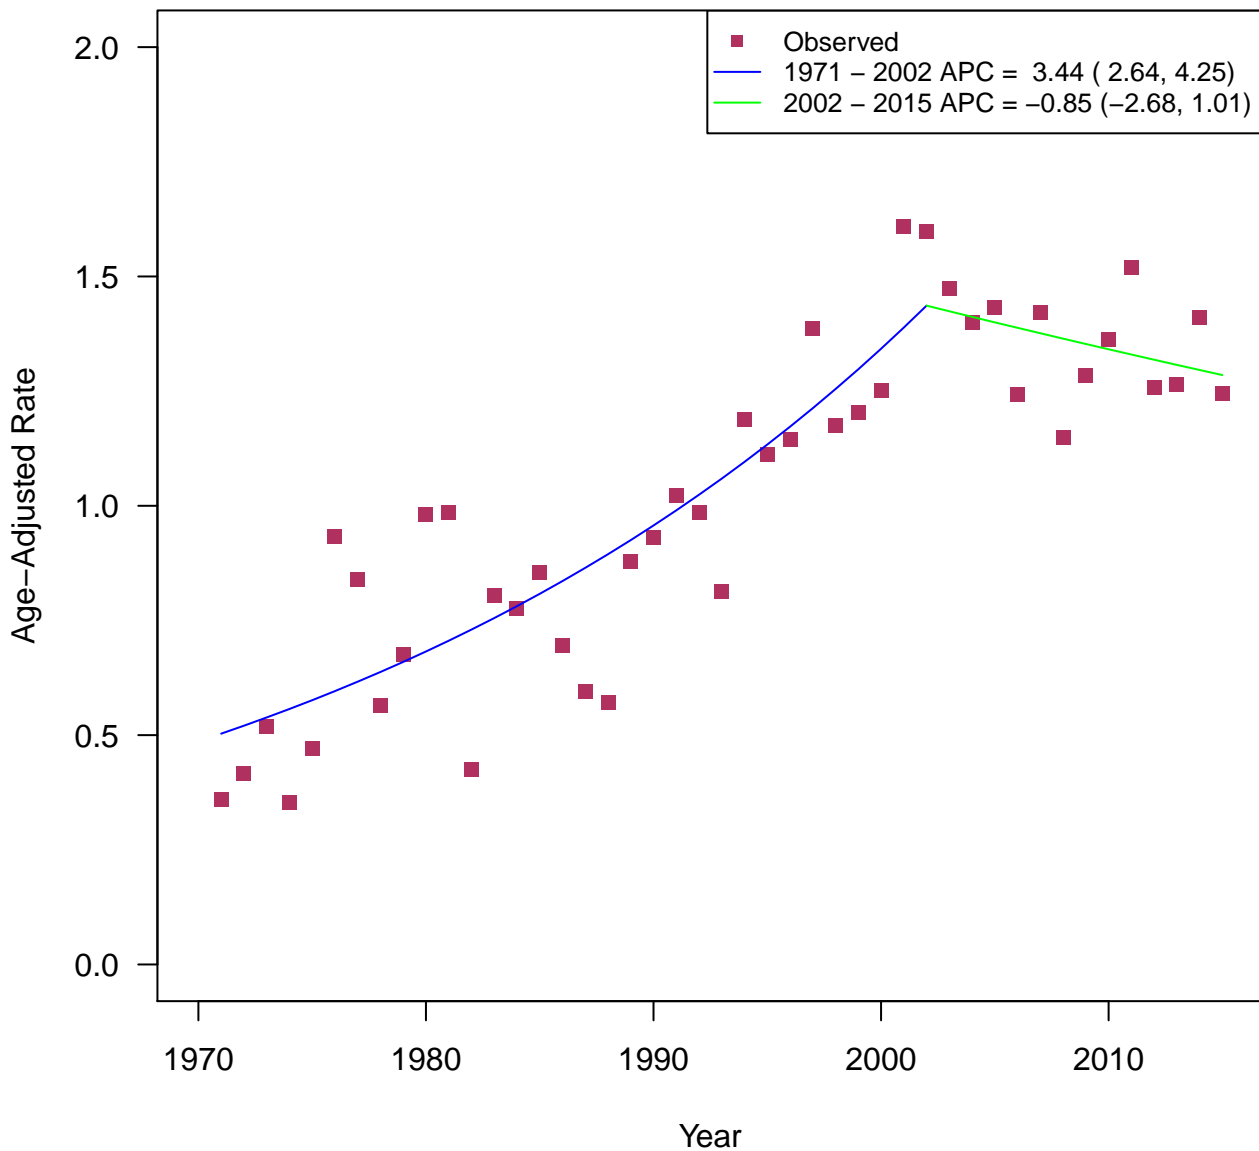



**Figure 212. Age-adjusted incidence rates of liver cancer in males aged 30–39 years in Canada, 1971–2015**

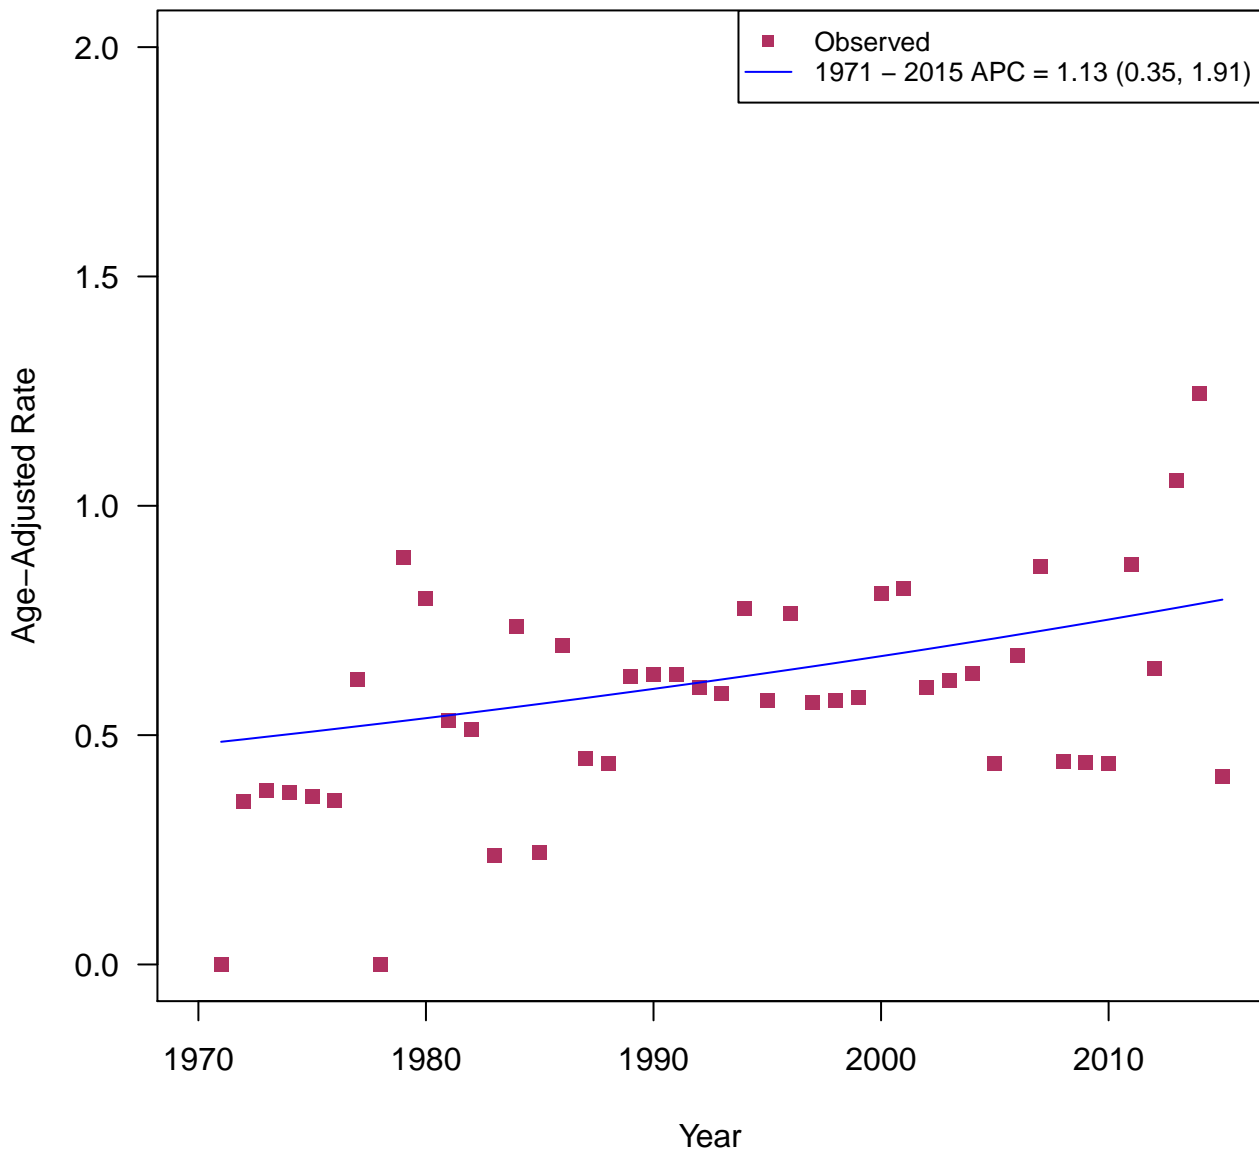

**Figure 213. Age-adjusted incidence rates of liver cancer in males aged 40–49 years in Canada, 1971–2015**

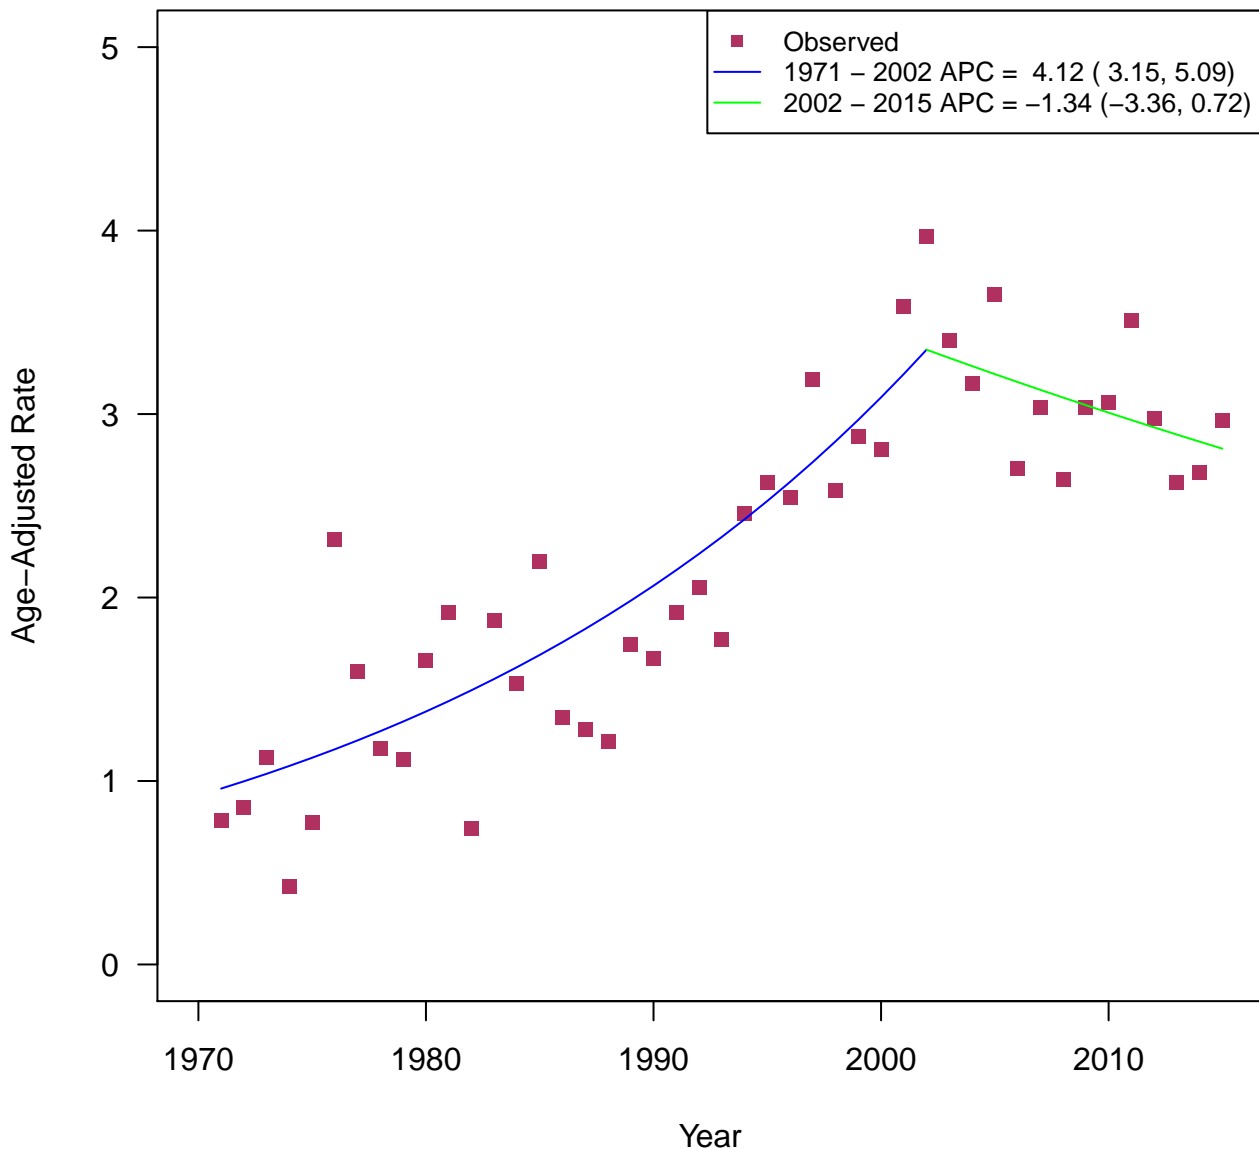

**Figure 214. Age-adjusted incidence rates of liver cancer in males aged 50–59 years in Canada, 1971–2015**

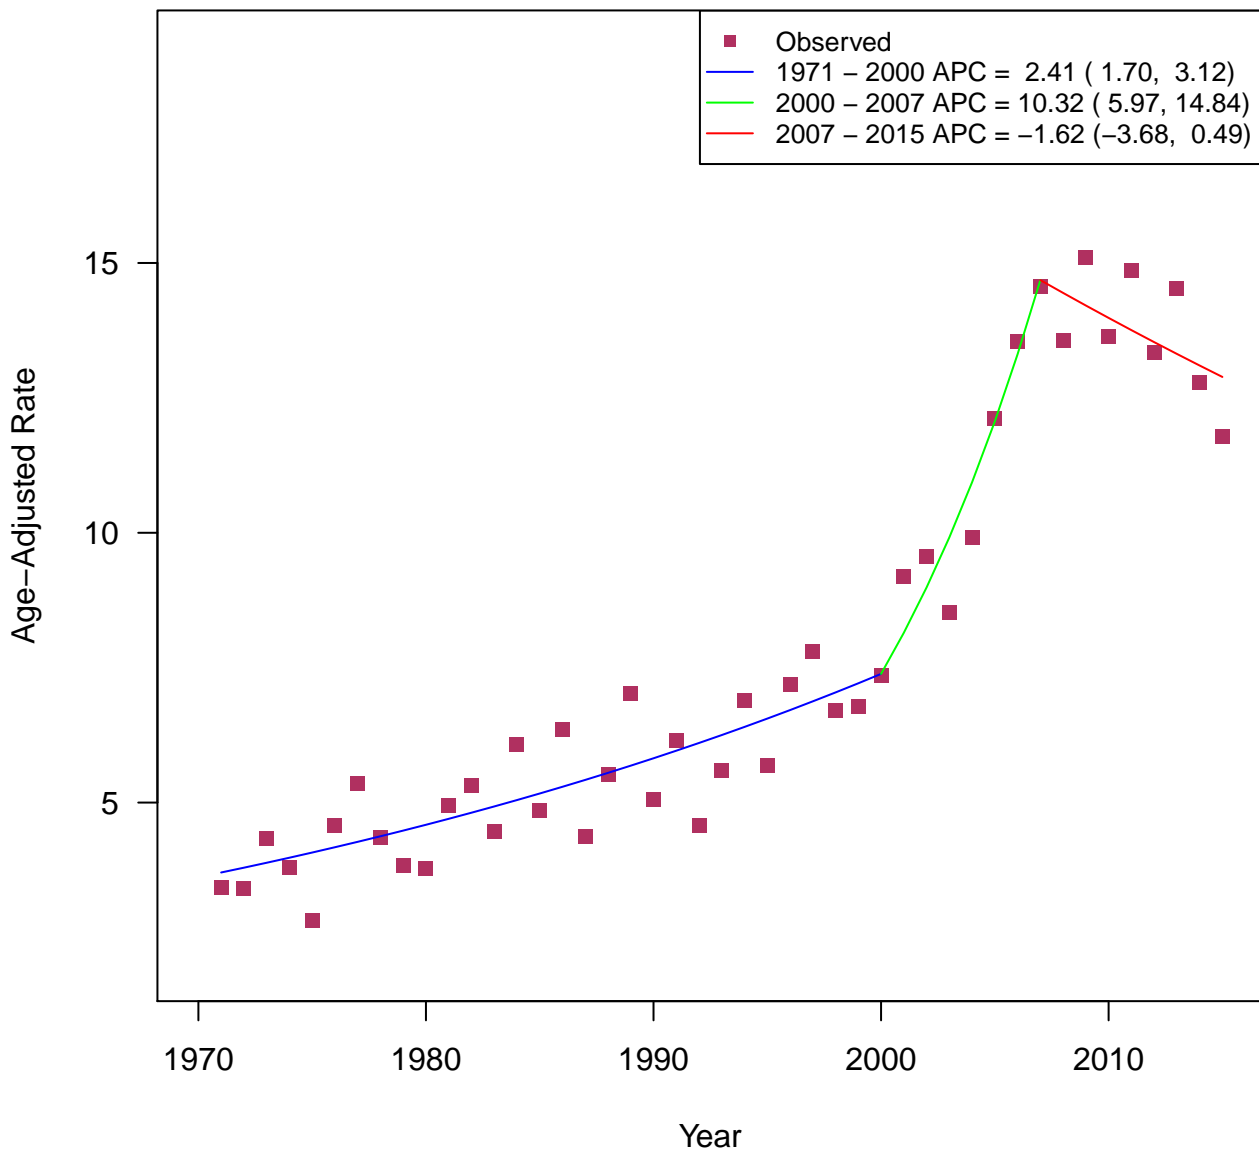

**Figure 215. Age-adjusted incidence rates of liver cancer in males aged 60–69 years in Canada, 1971–2015**

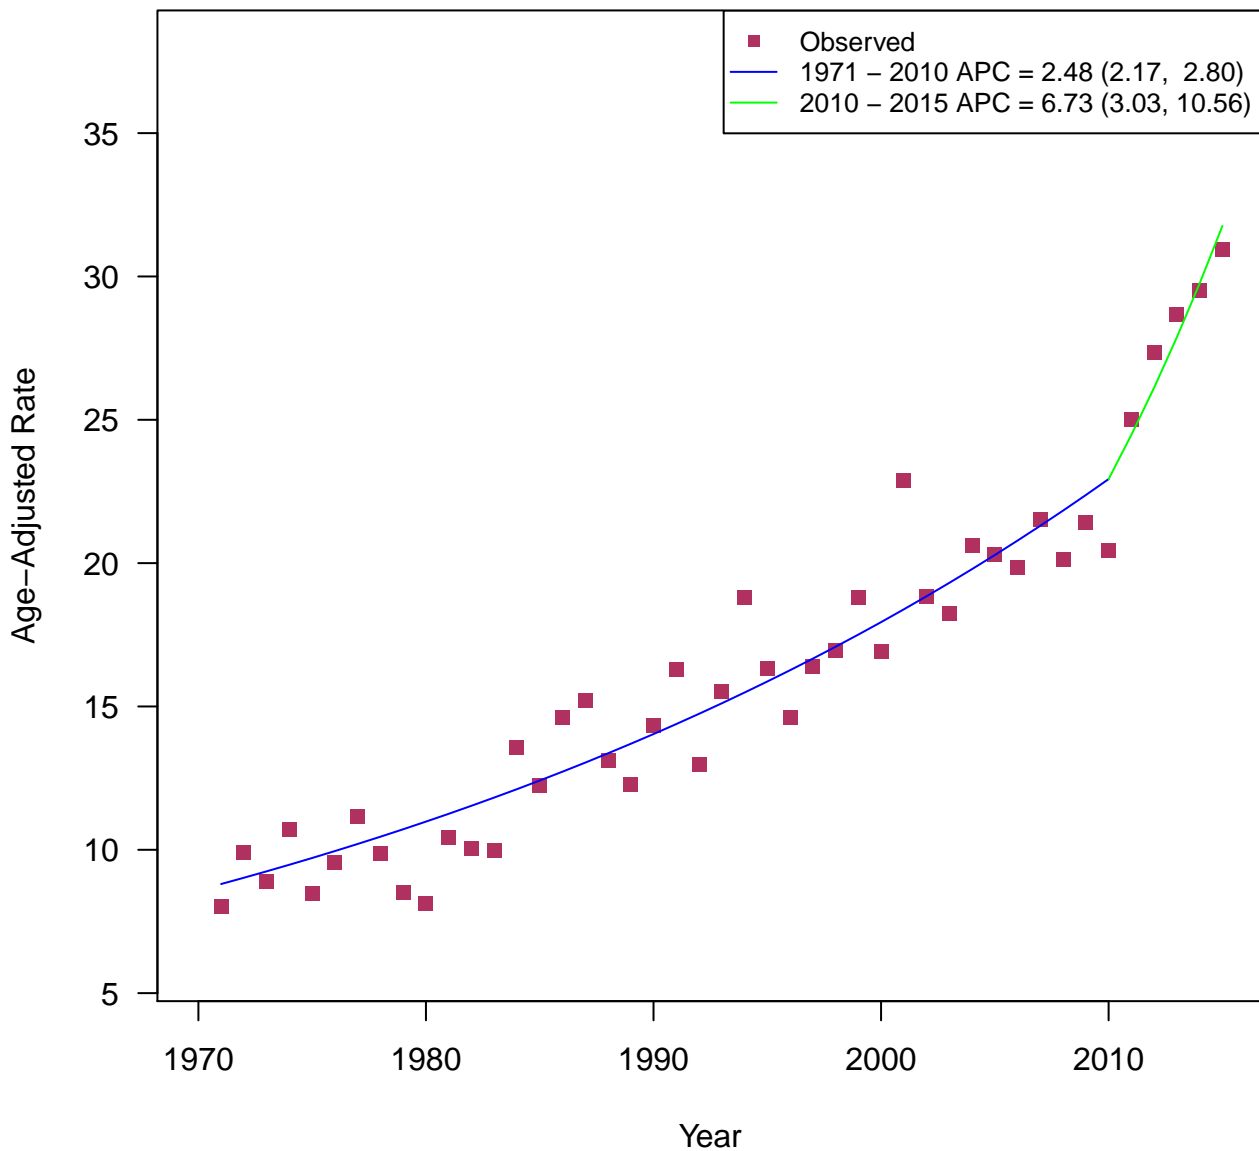

**Figure 216. Age-adjusted incidence rates of liver cancer in males aged 70–79 years in Canada, 1971–2015**

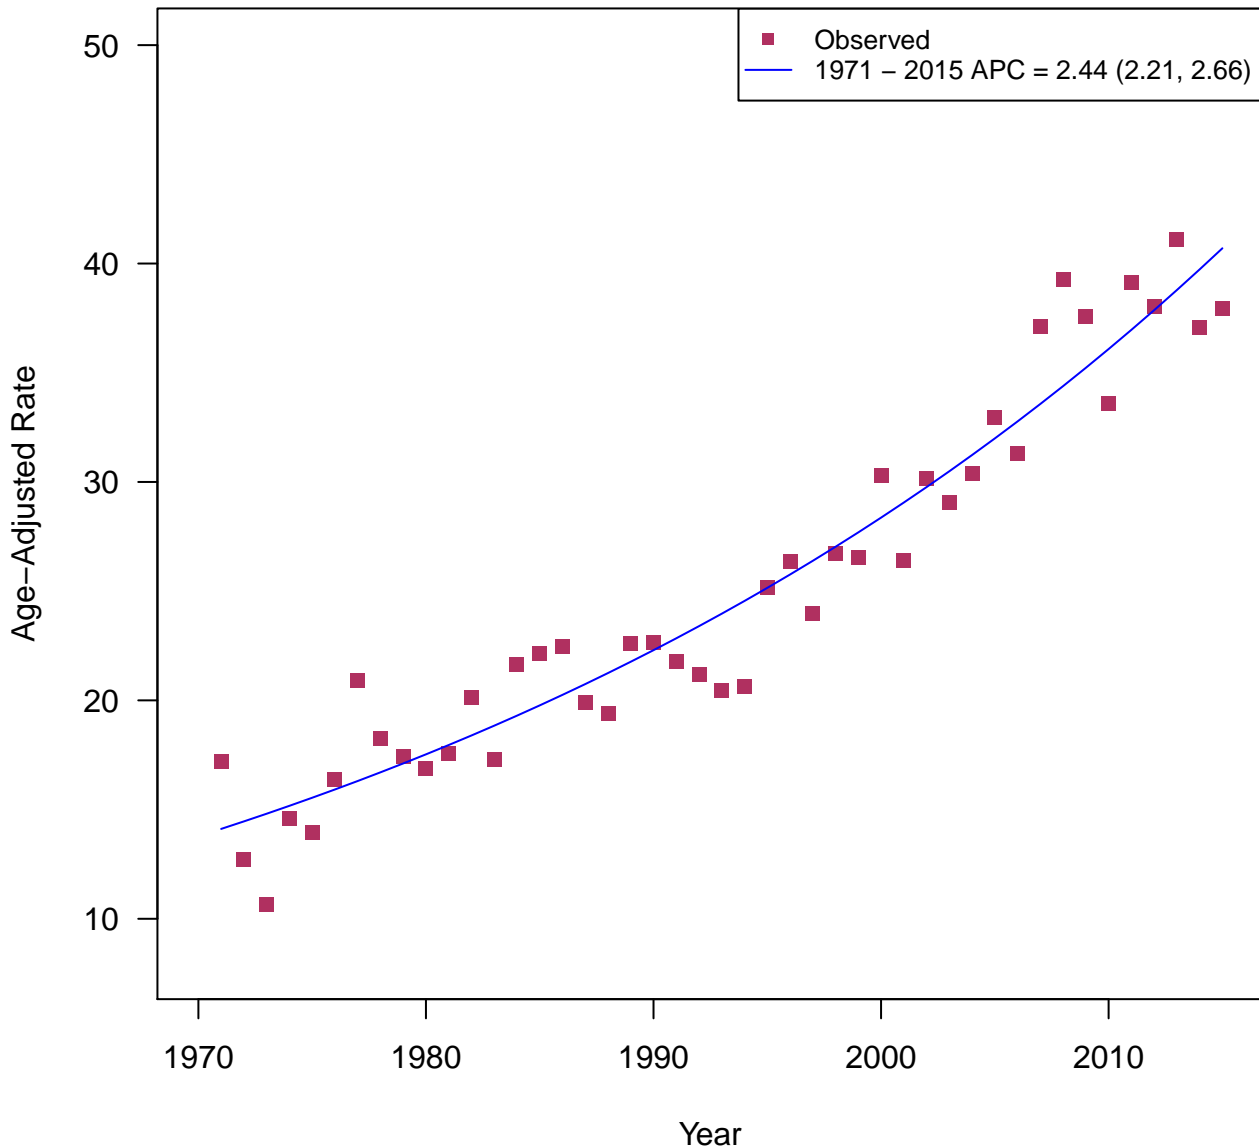

**Figure 217. Age-adjusted incidence rates of liver cancer in males aged 80–89 years in Canada, 1971–2015**

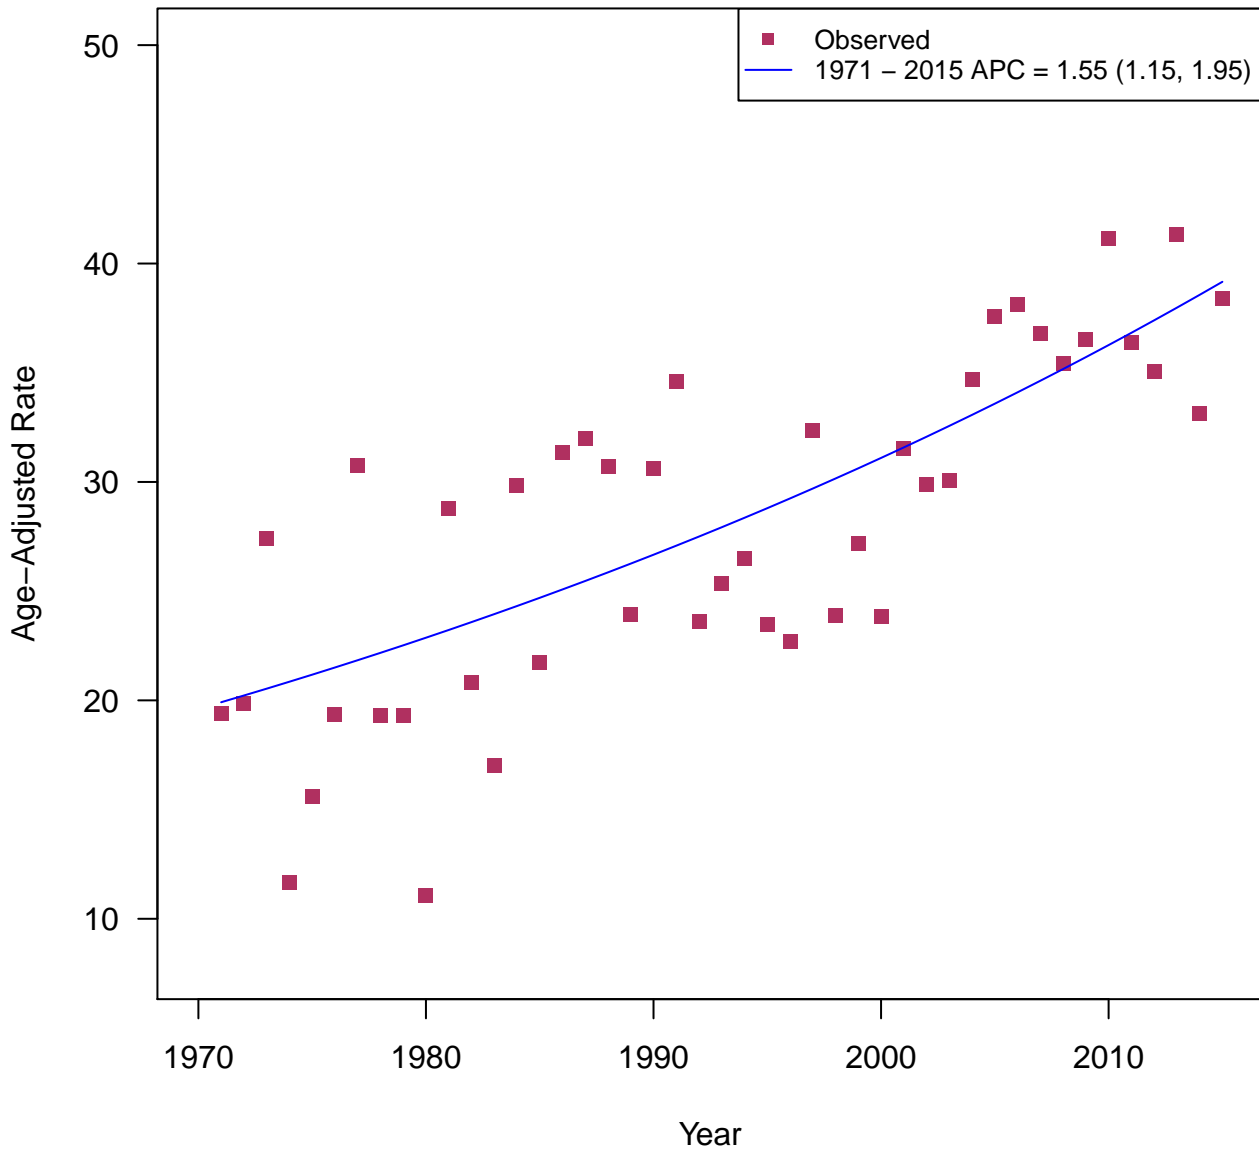

**Figure 218. Age-adjusted incidence rates of liver cancer in females aged 20–29 years in Canada, 1971–2015**

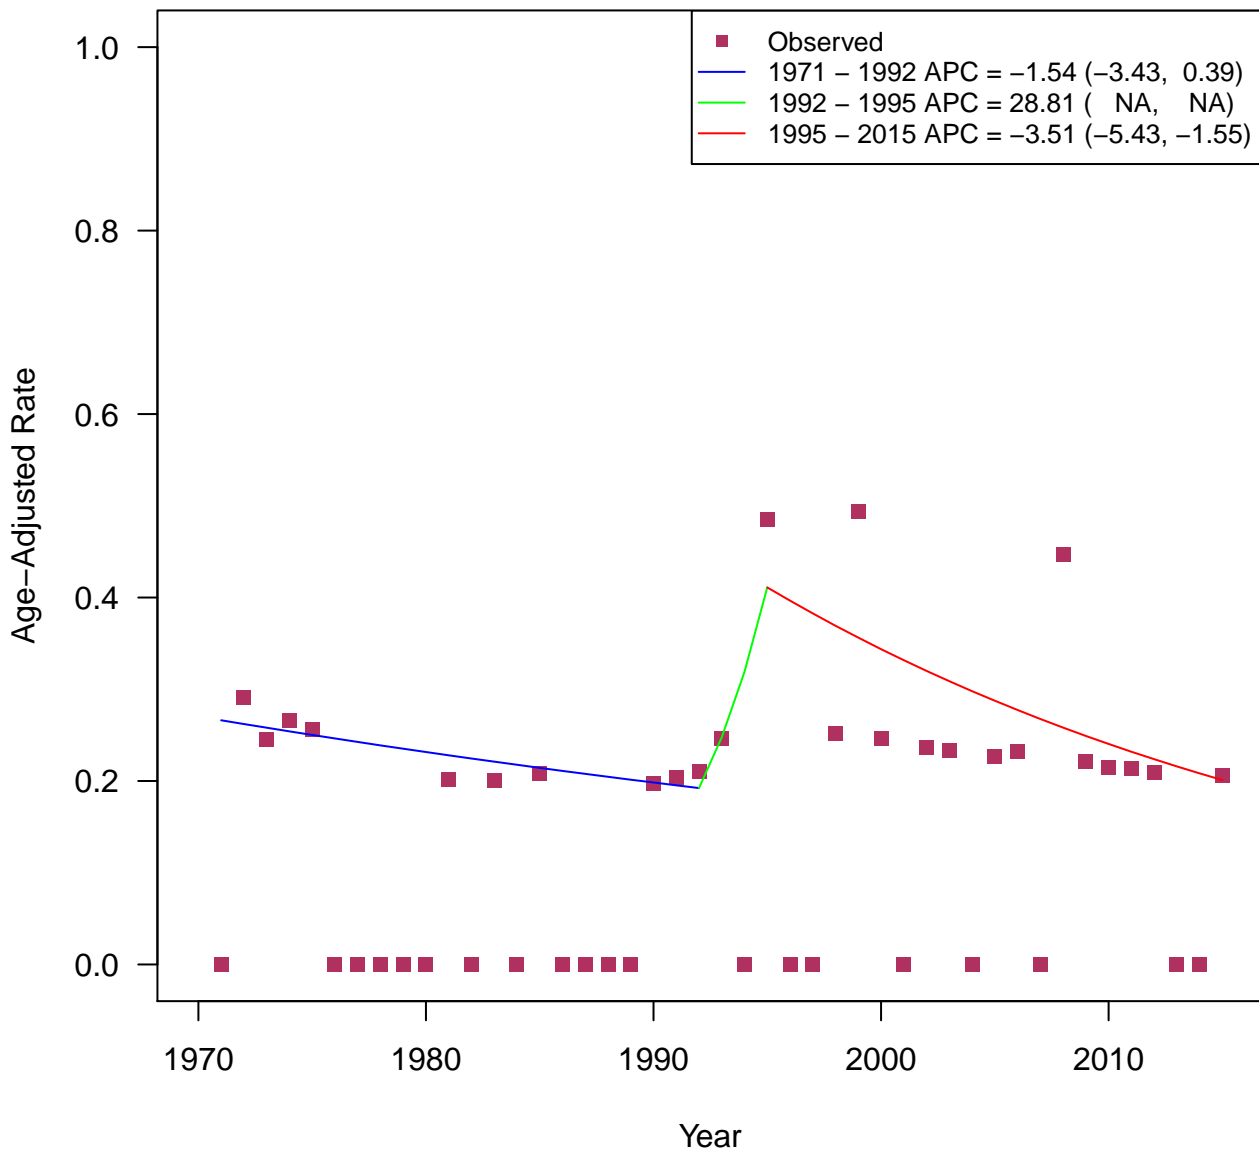

**Figure 219. Age-adjusted incidence rates of liver cancer in females aged 20–39 years in Canada, 1971–2015**

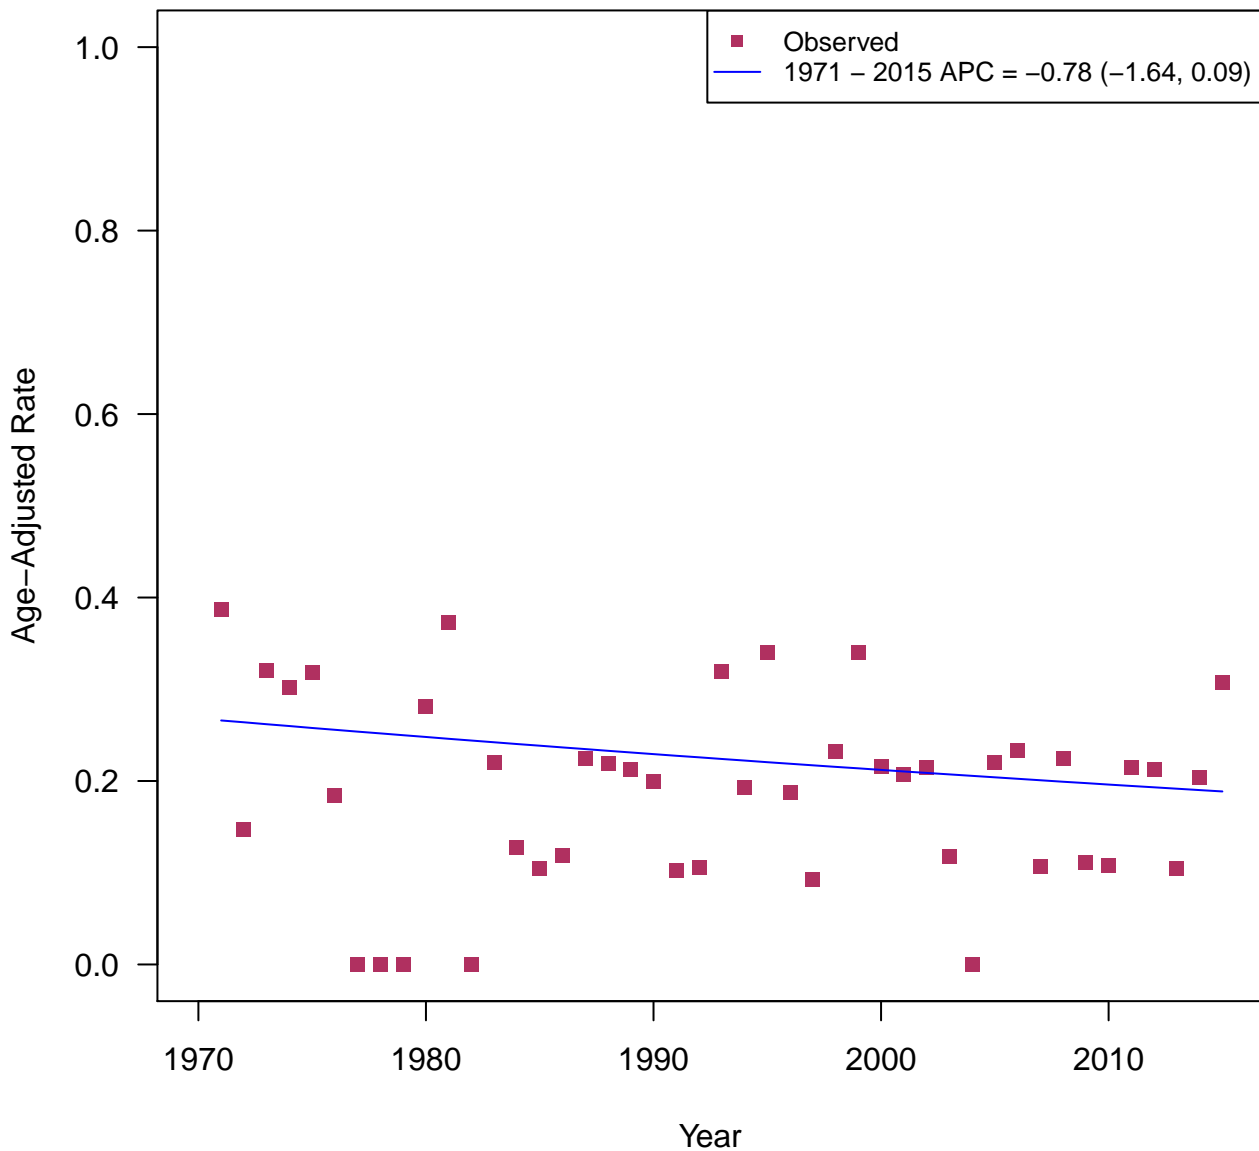



**Figure 220. Age-adjusted incidence rates of liver cancer in females aged 20–49 years in Canada, 1971–2015**

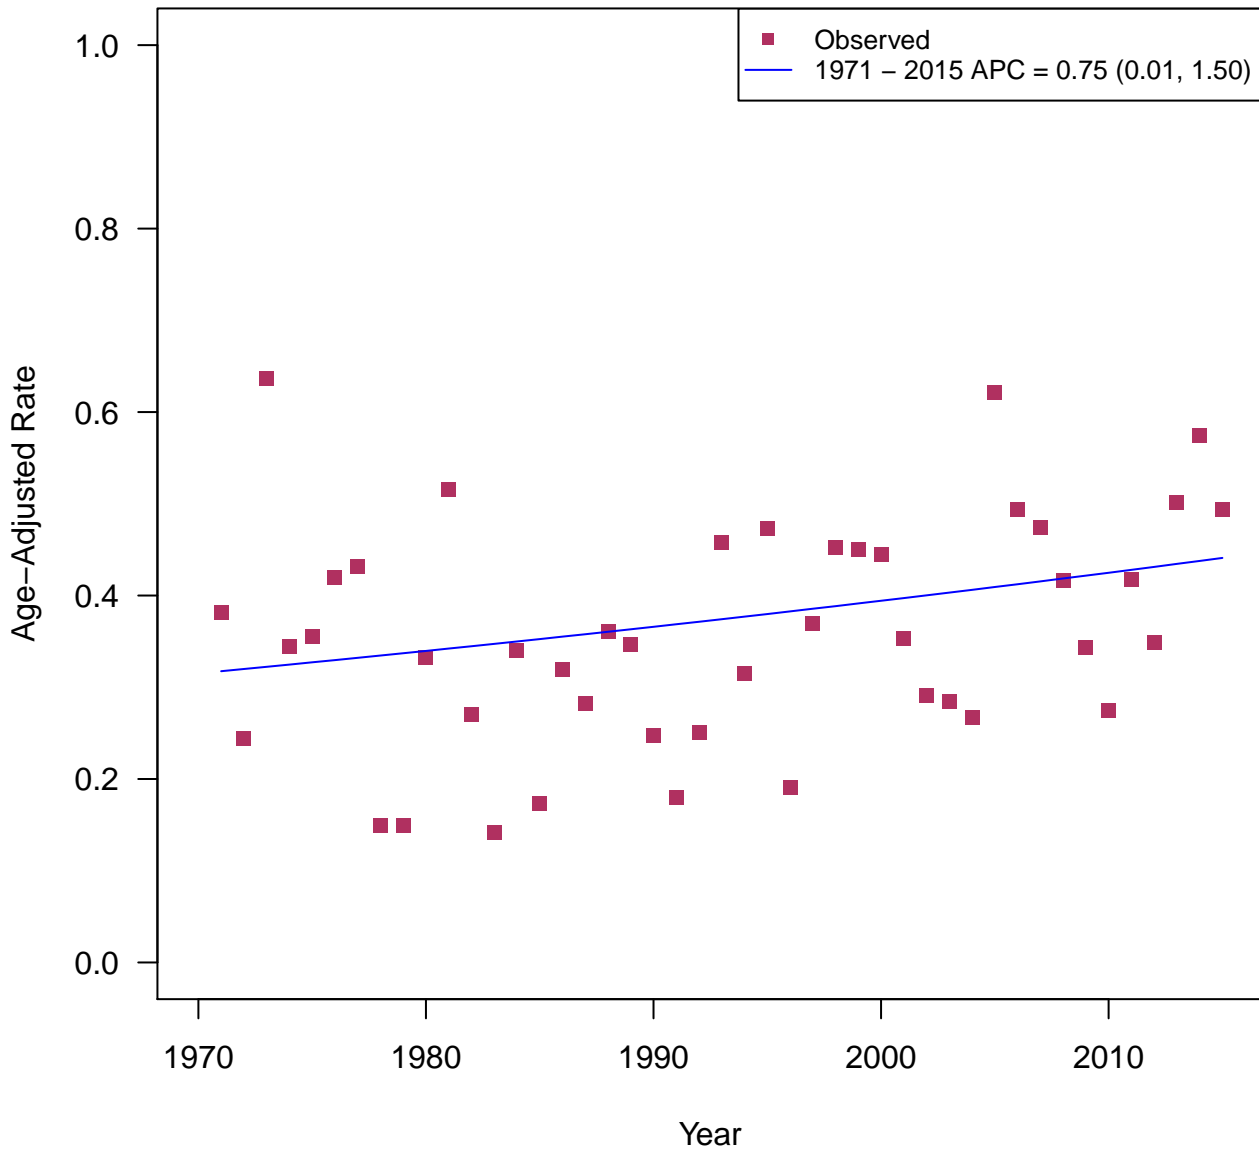

**Figure 221. Age-adjusted incidence rates of liver cancer in females aged 30–39 years in Canada, 1971–2015**

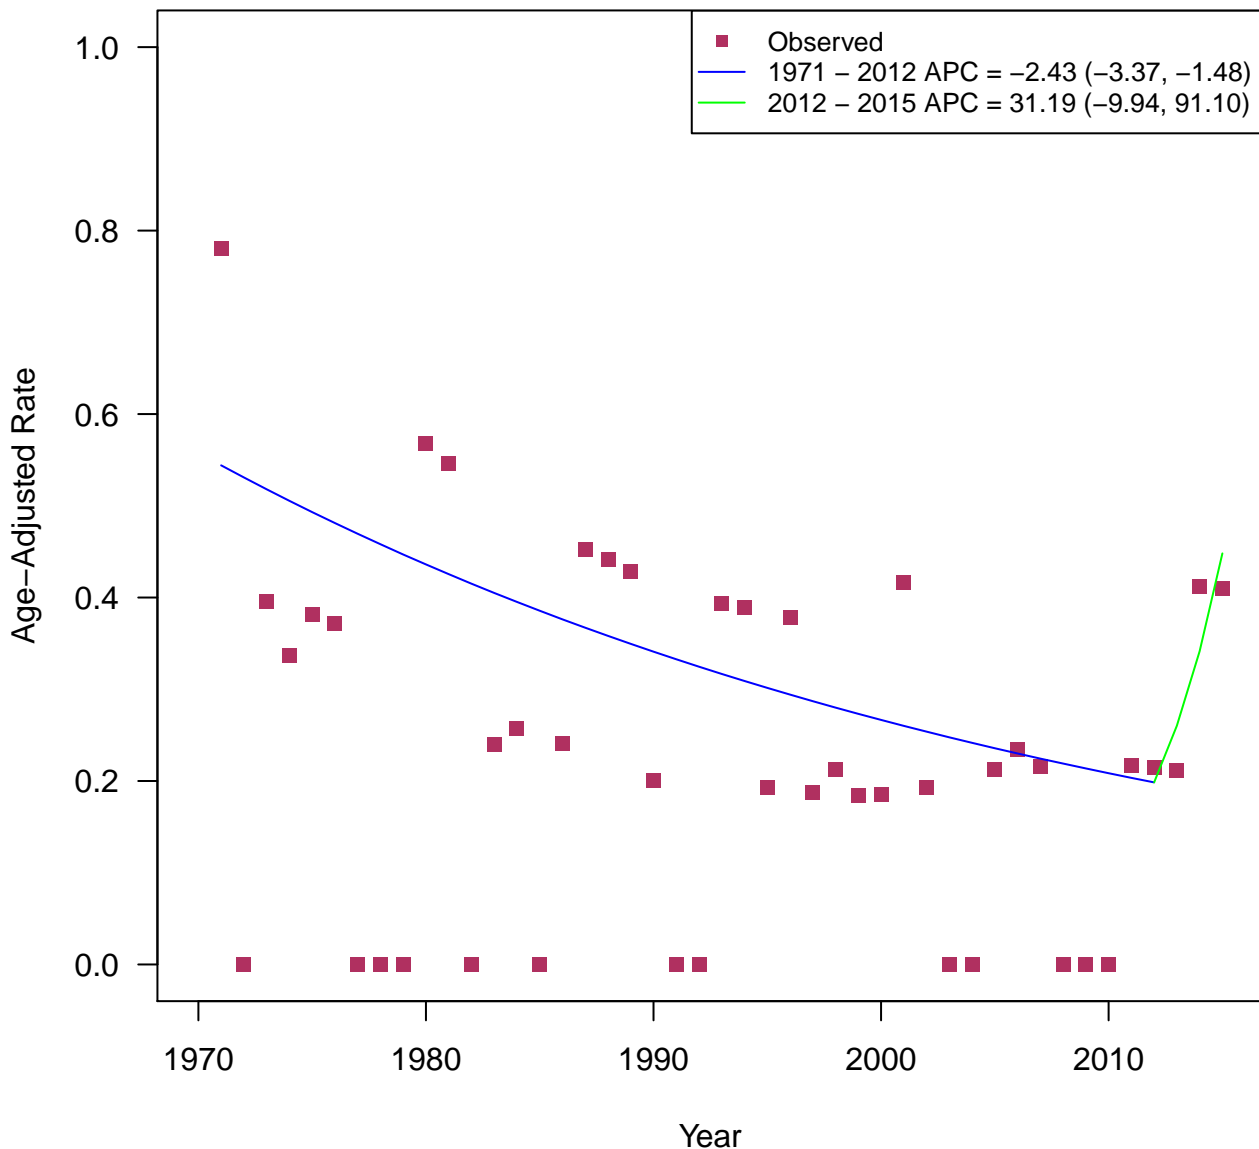

**Figure 222. Age-adjusted incidence rates of liver cancer in females aged 40–49 years in Canada, 1971–2015**

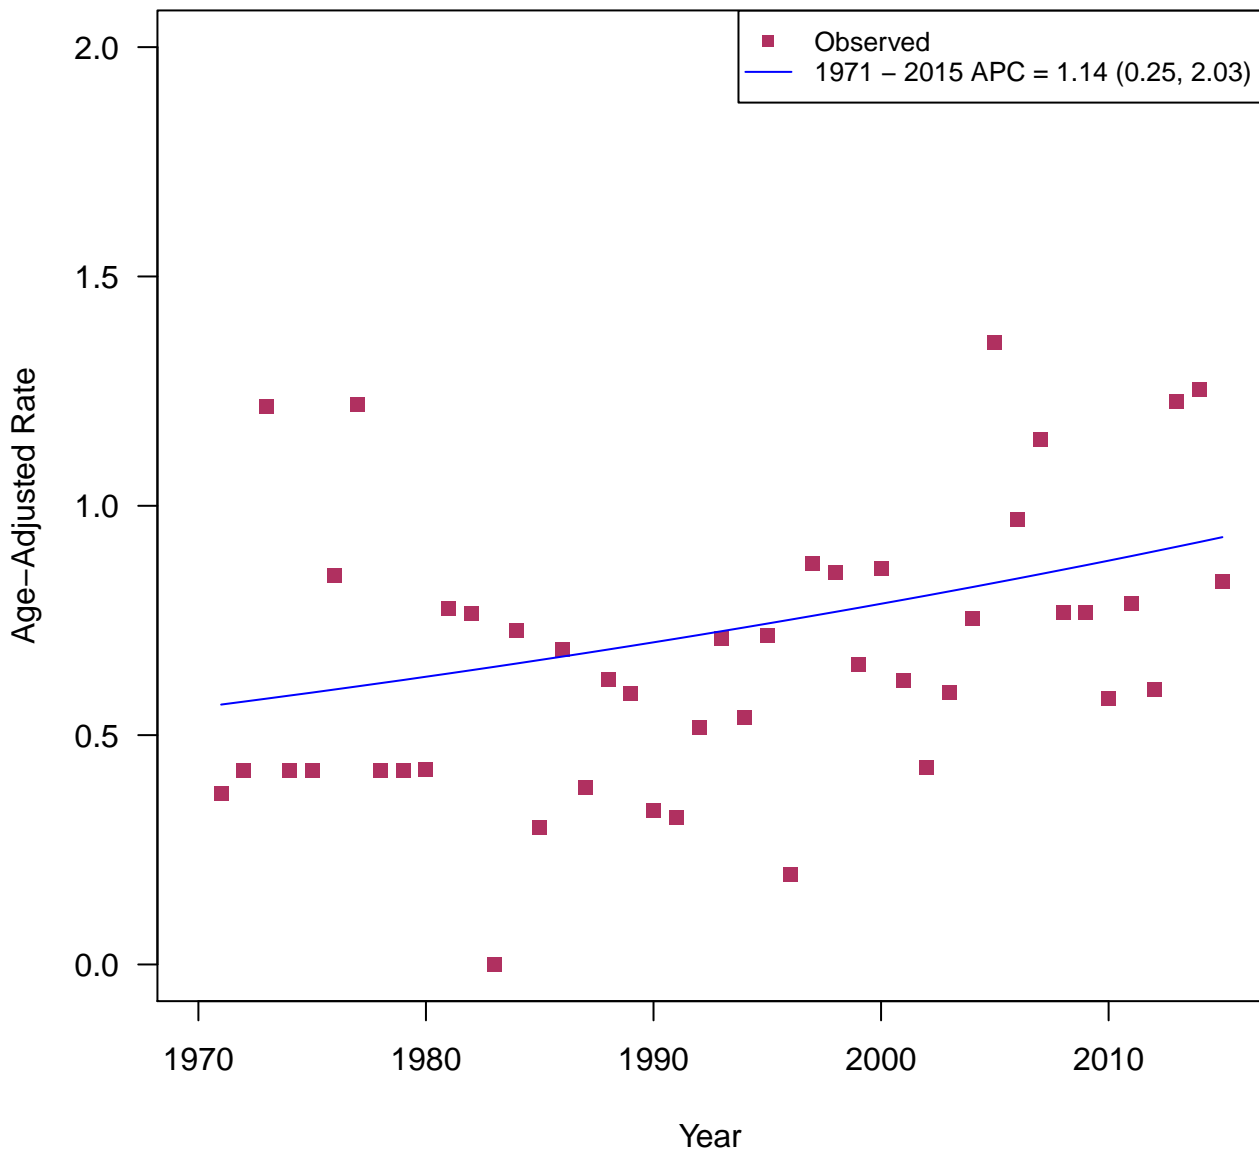

**Figure 223. Age-adjusted incidence rates of liver cancer in females aged 50–59 years in Canada, 1971–2015**

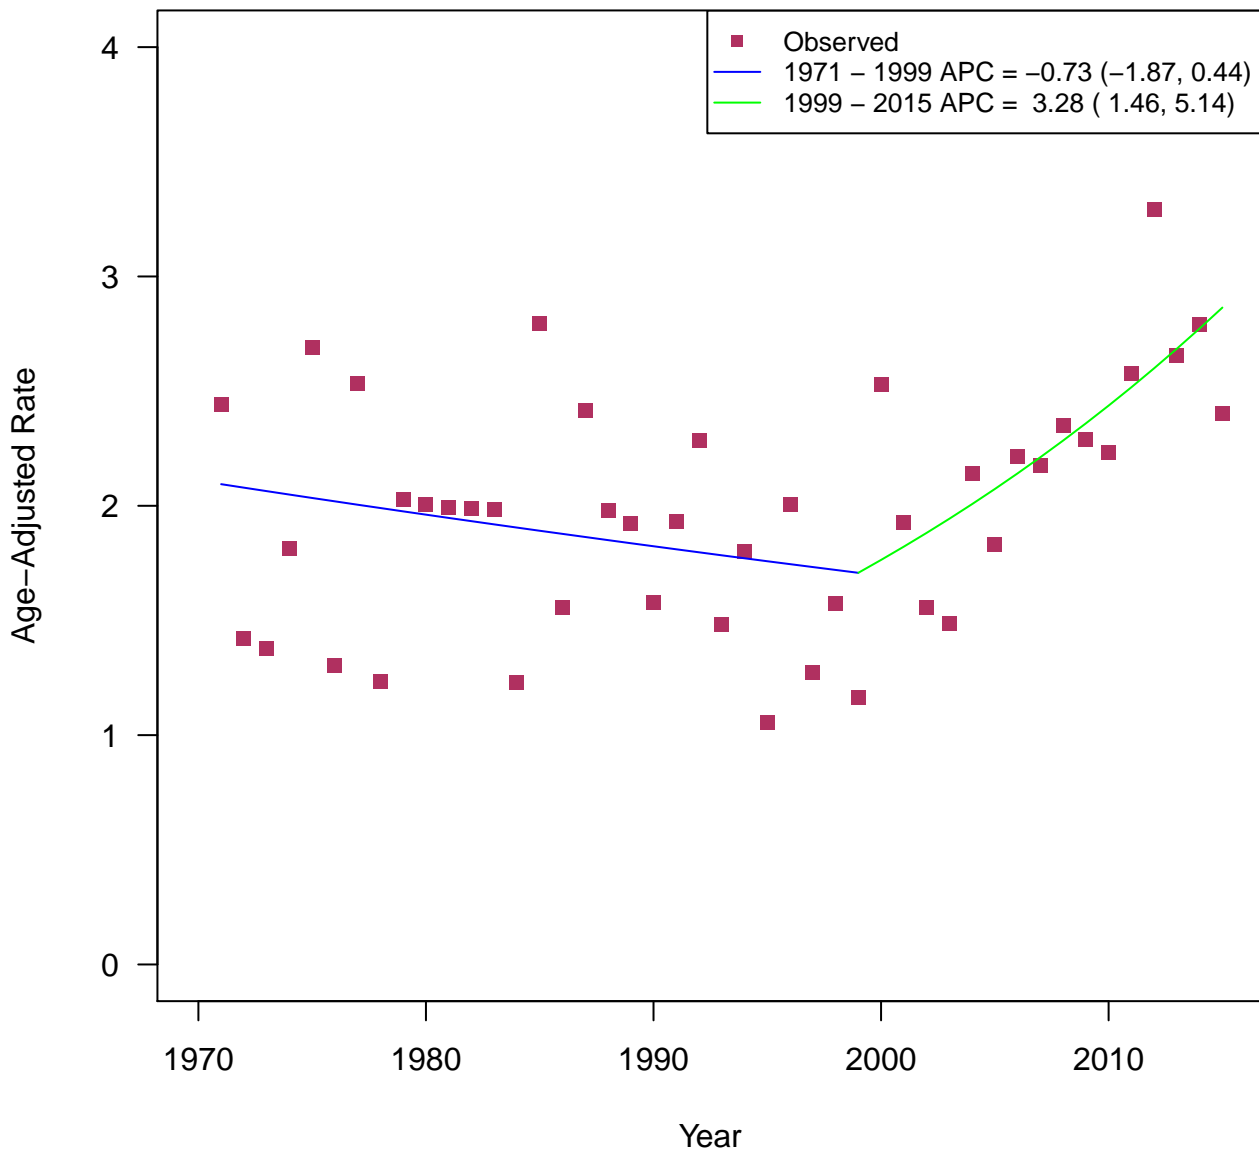

**Figure 224. Age-adjusted incidence rates of liver cancer in females aged 60–69 years in Canada, 1971–2015**

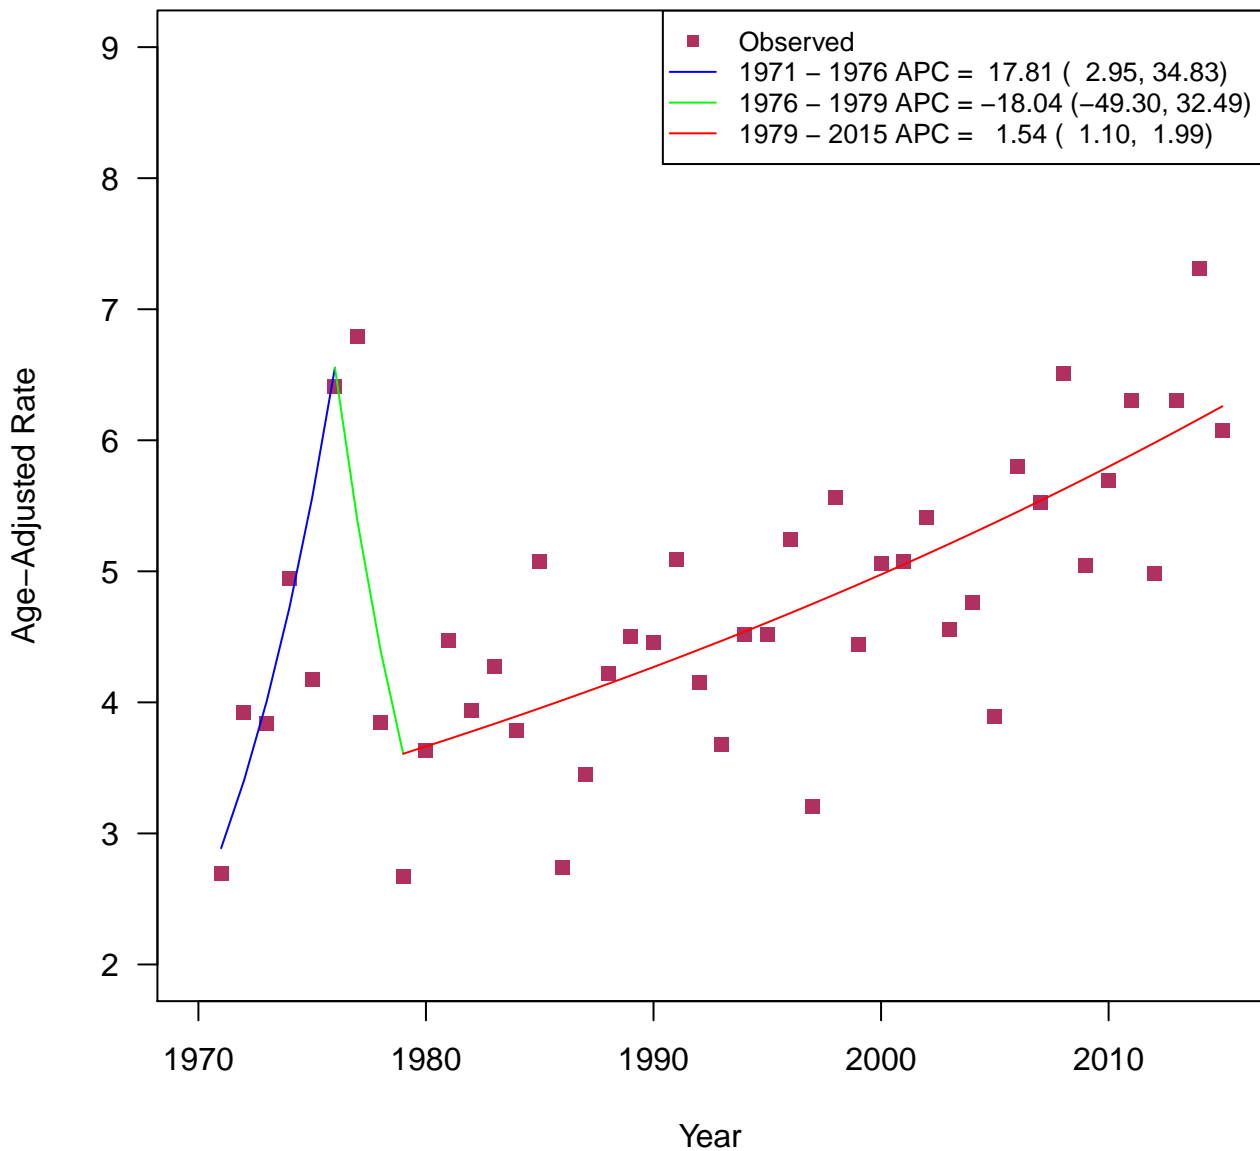

**Figure 225. Age-adjusted incidence rates of liver cancer in females aged 70–79 years in Canada, 1971–2015**

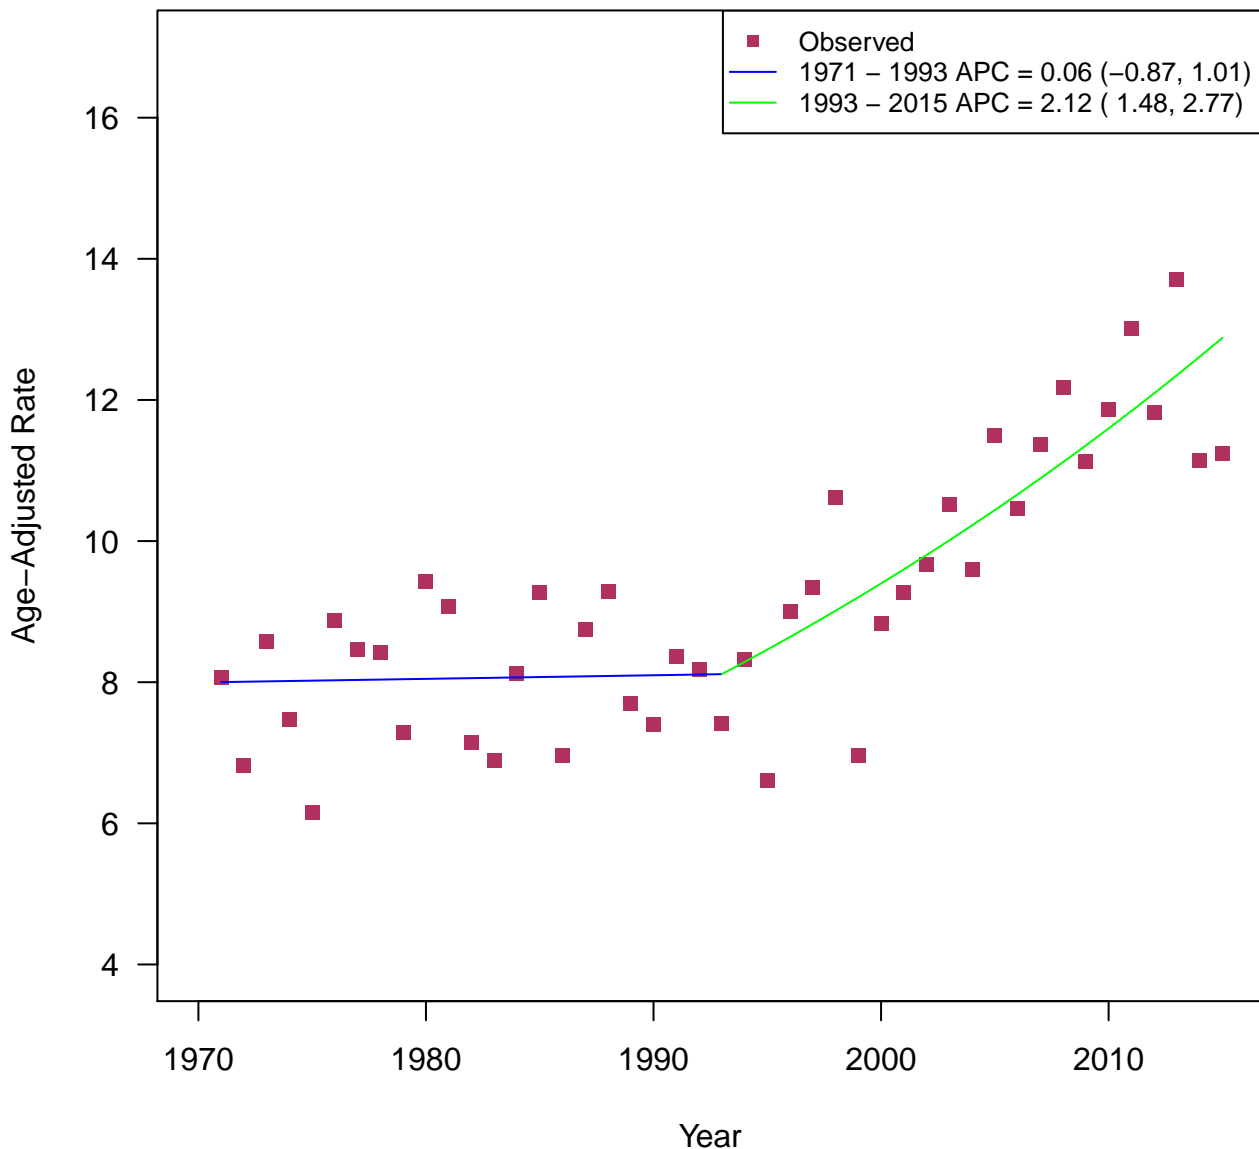

**Figure 226. Age-adjusted incidence rates of liver cancer in females aged 80–89 years in Canada, 1971–2015**

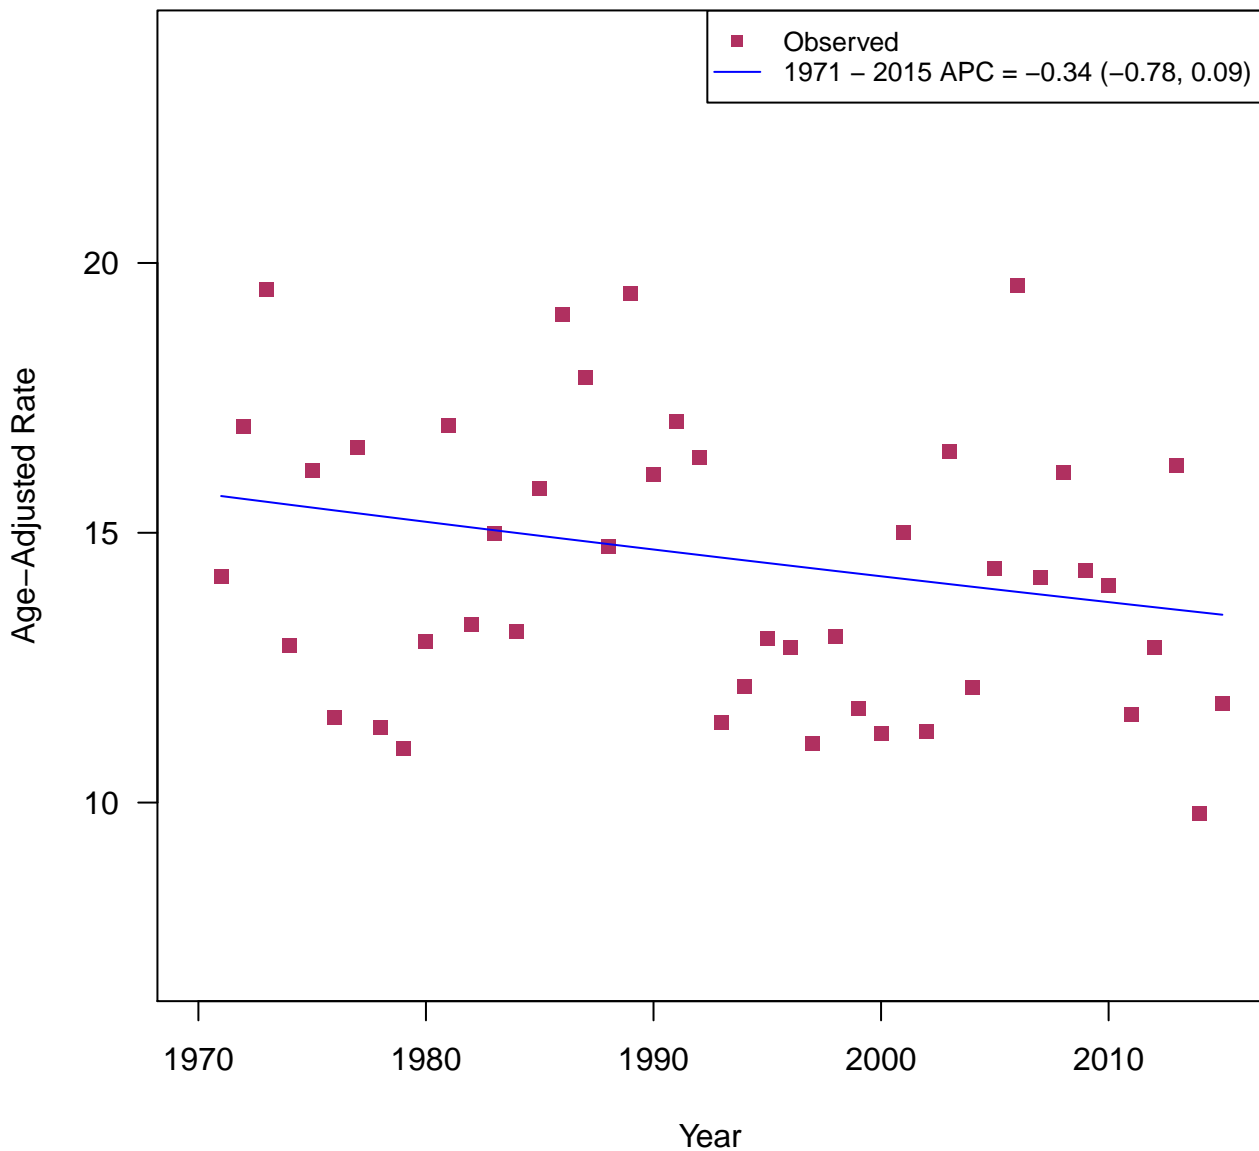

**Figure 227. Age-adjusted incidence rates of lung cancer in males aged 20–29 years in Canada, 1971–2015**

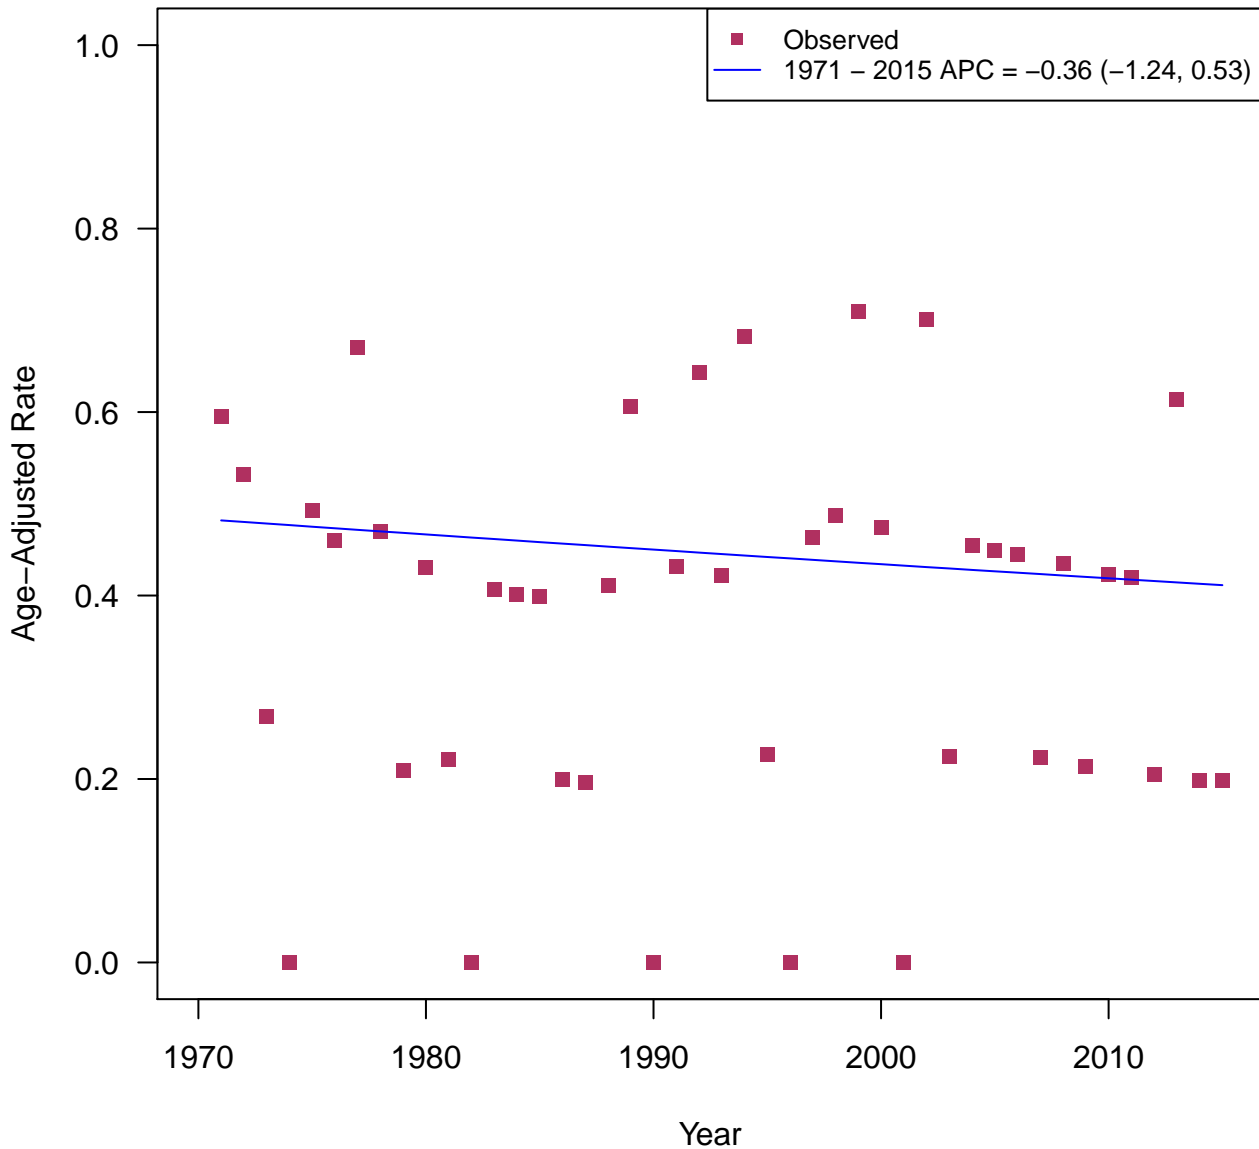



**Figure 228. Age-adjusted incidence rates of lung cancer in males aged 20–39 years in Canada, 1971–2015**

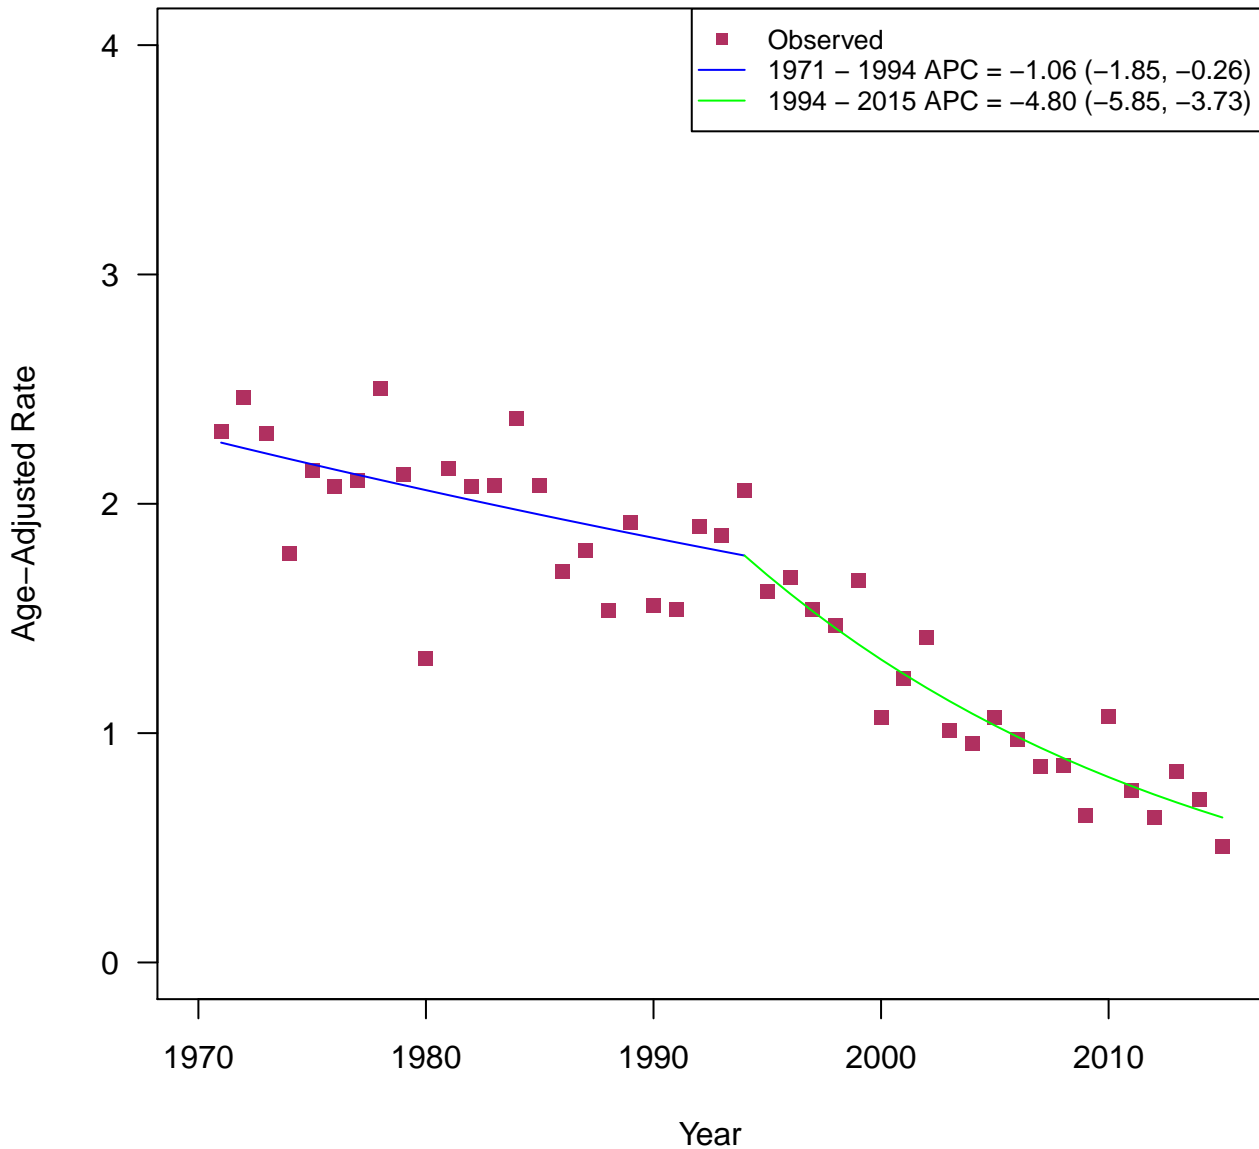

**Figure 229. Age-adjusted incidence rates of lung cancer in males aged 20–49 years in Canada, 1971–2015**

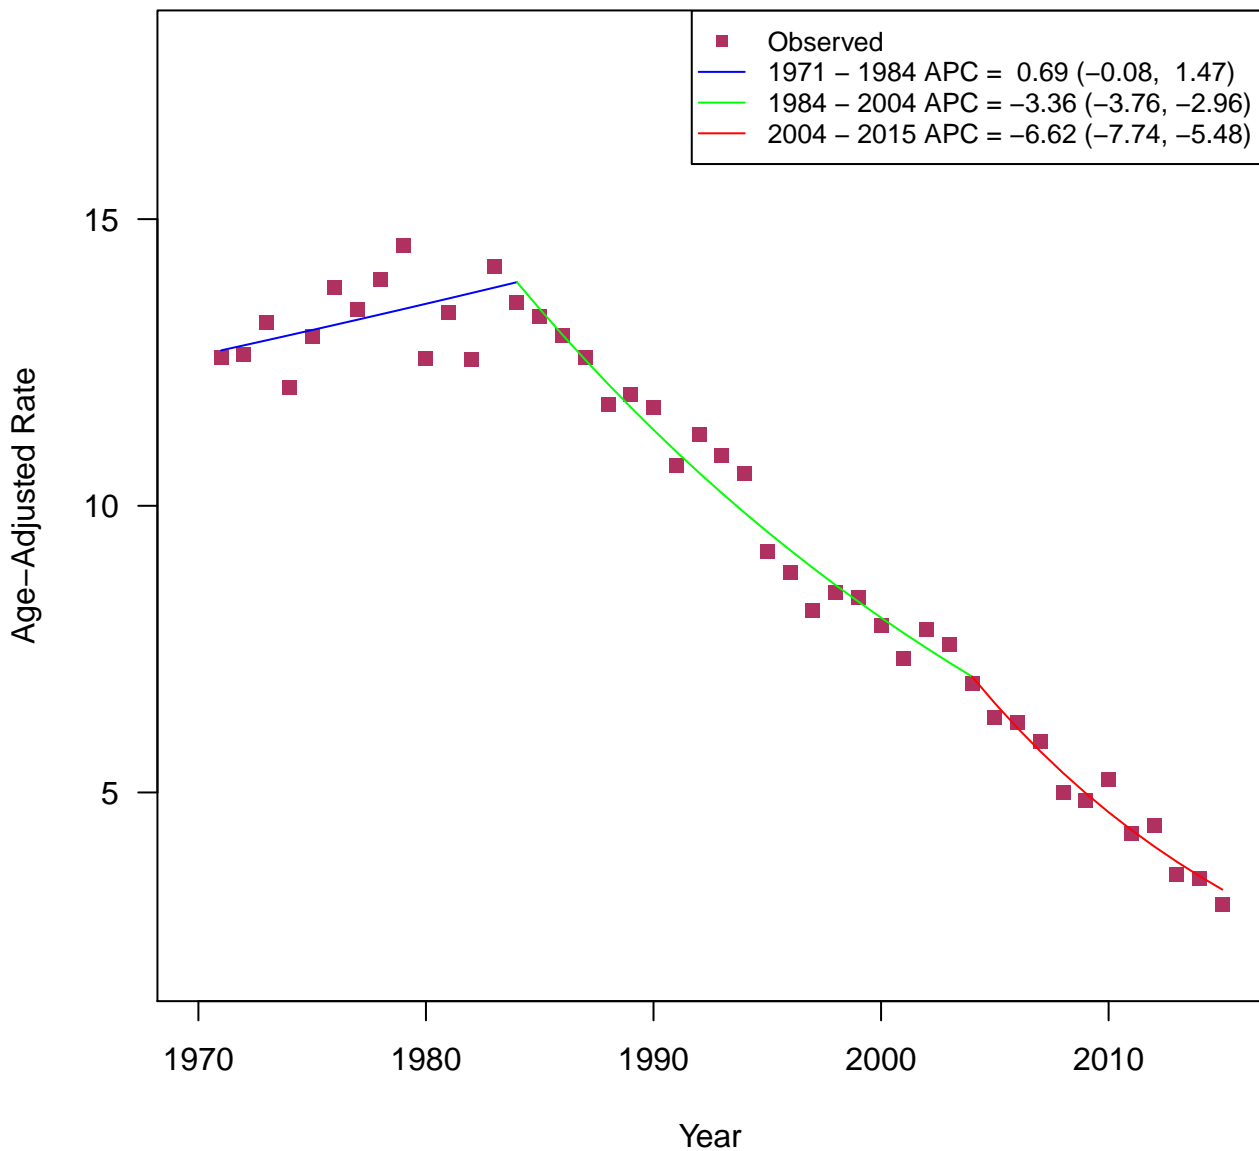

**Figure 230. Age-adjusted incidence rates of lung cancer in males aged 30–39 years in Canada, 1971–2015**

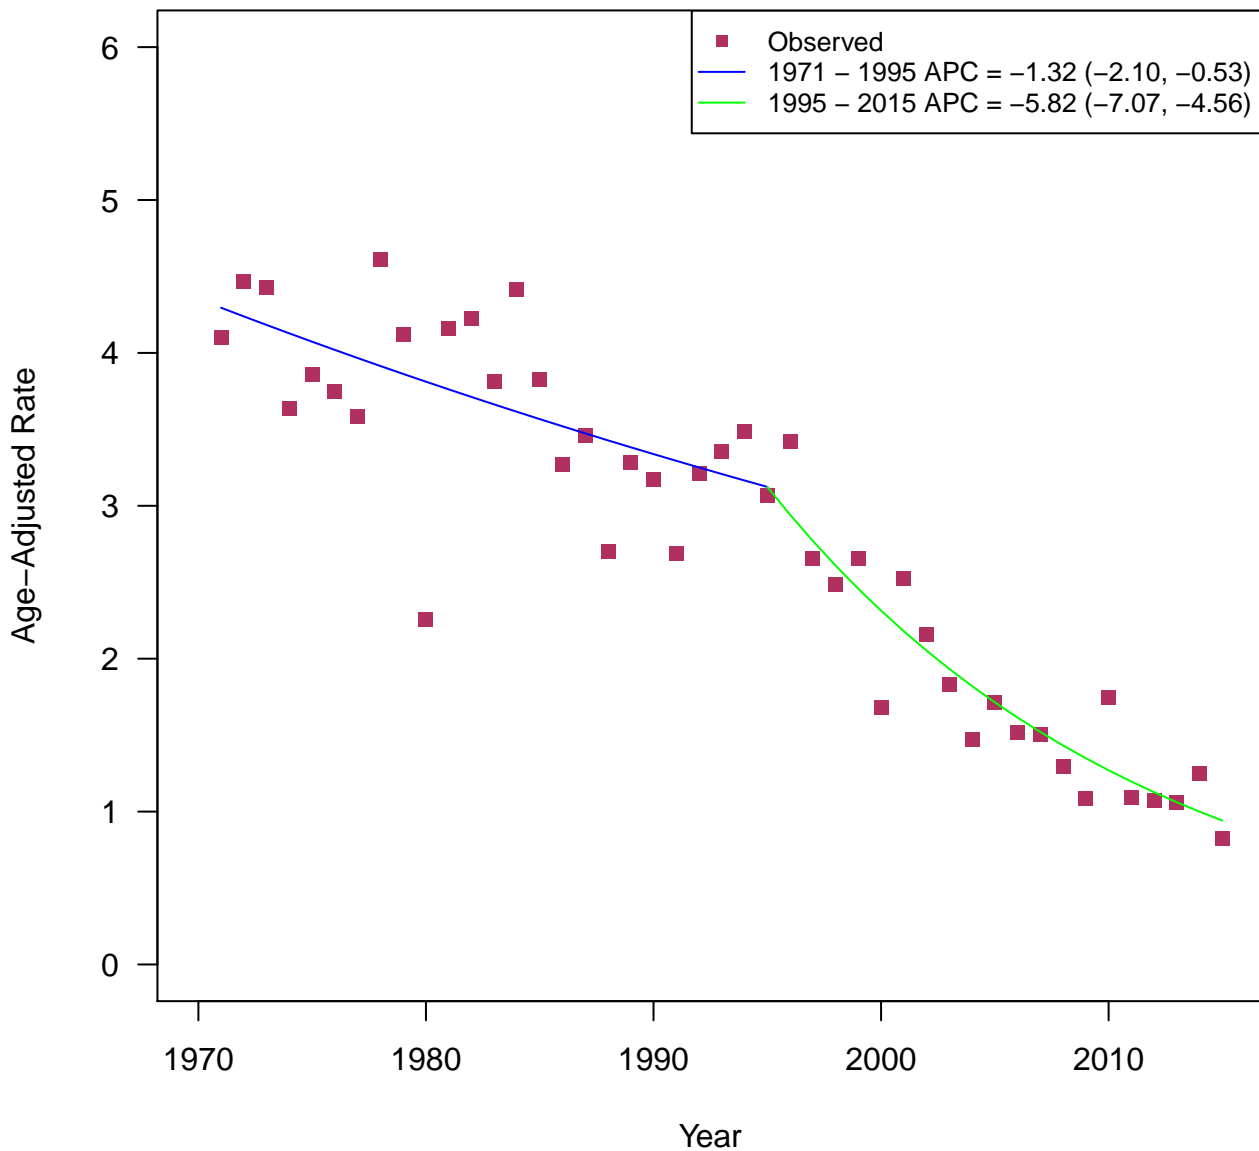

**Figure 231. Age-adjusted incidence rates of lung cancer in males aged 40–49 years in Canada, 1971–2015**

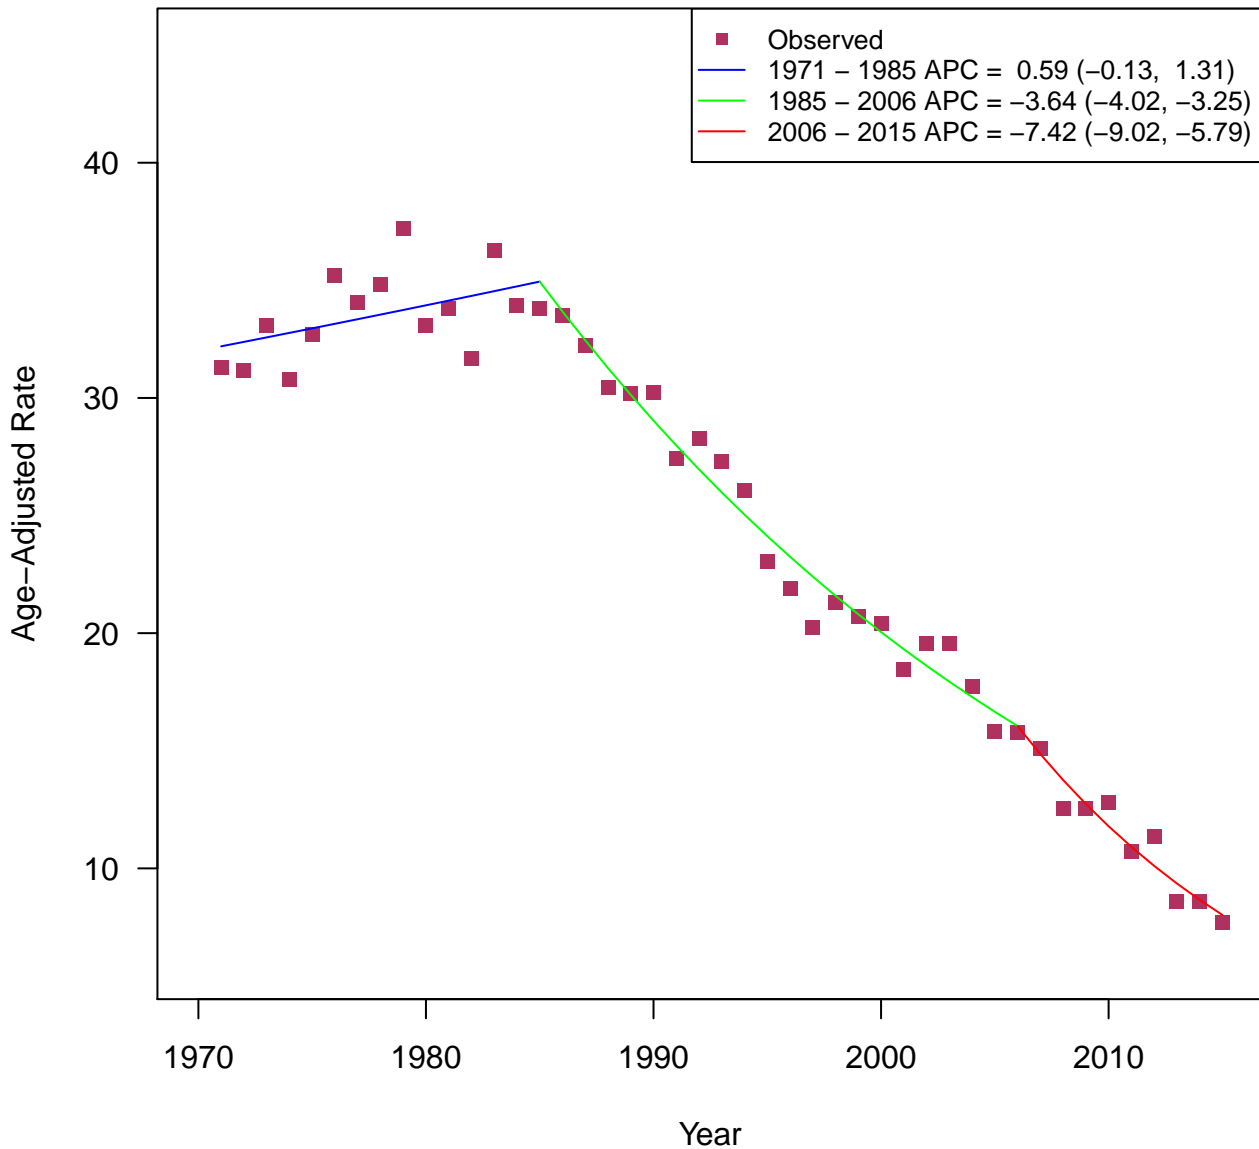

**Figure 232. Age-adjusted incidence rates of lung cancer in males aged 50–59 years in Canada, 1971–2015**

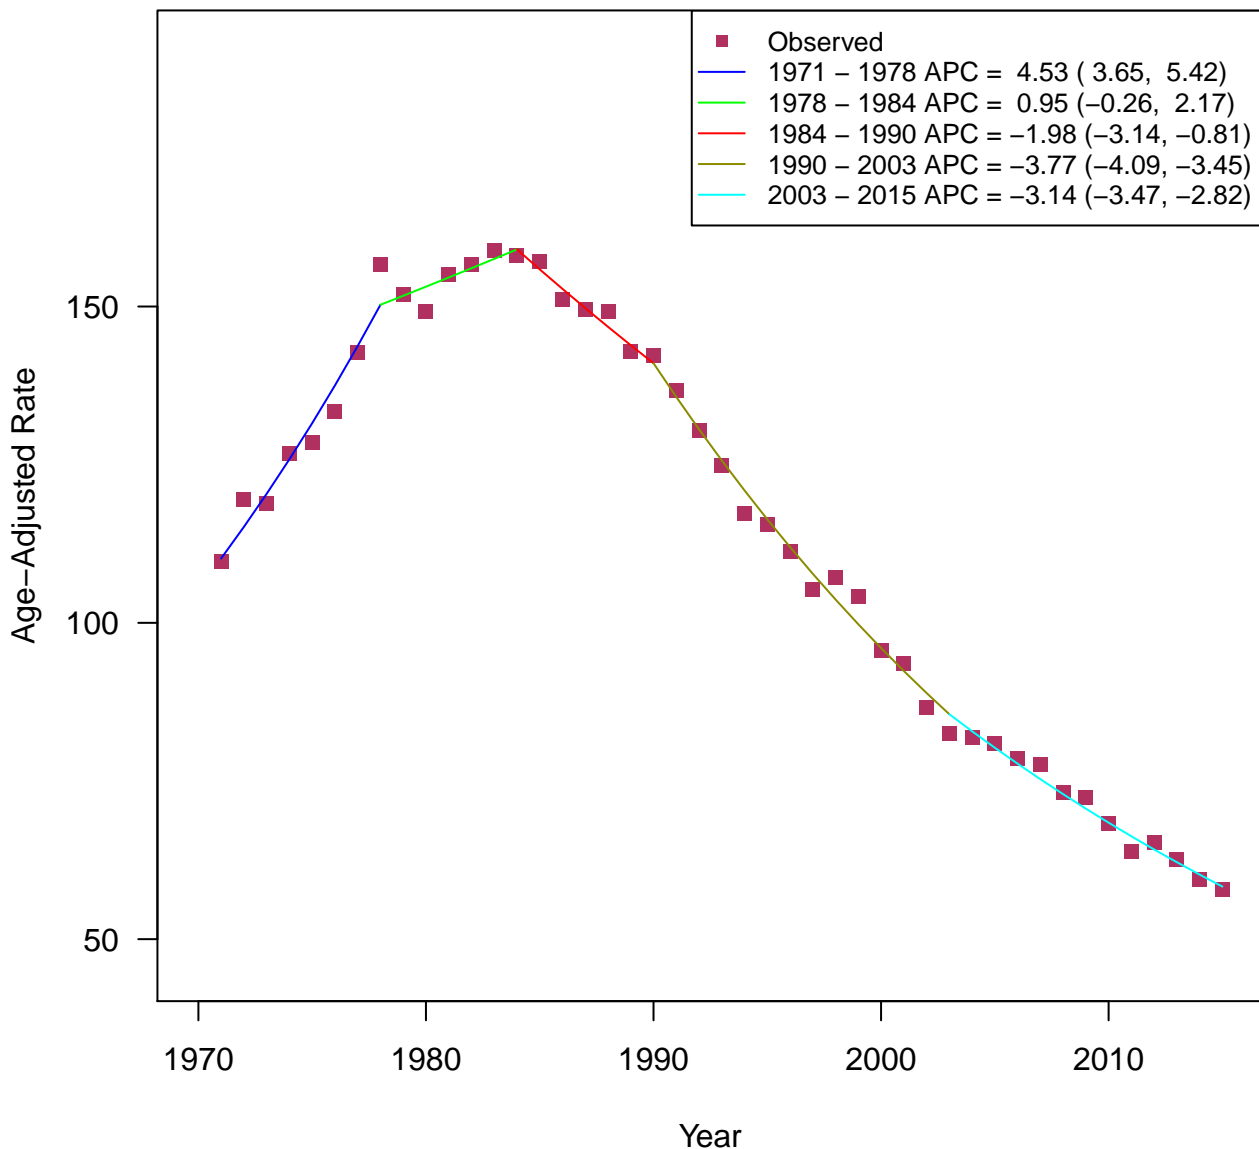

**Figure 233. Age-adjusted incidence rates of lung cancer in males aged 60–69 years in Canada, 1971–2015**

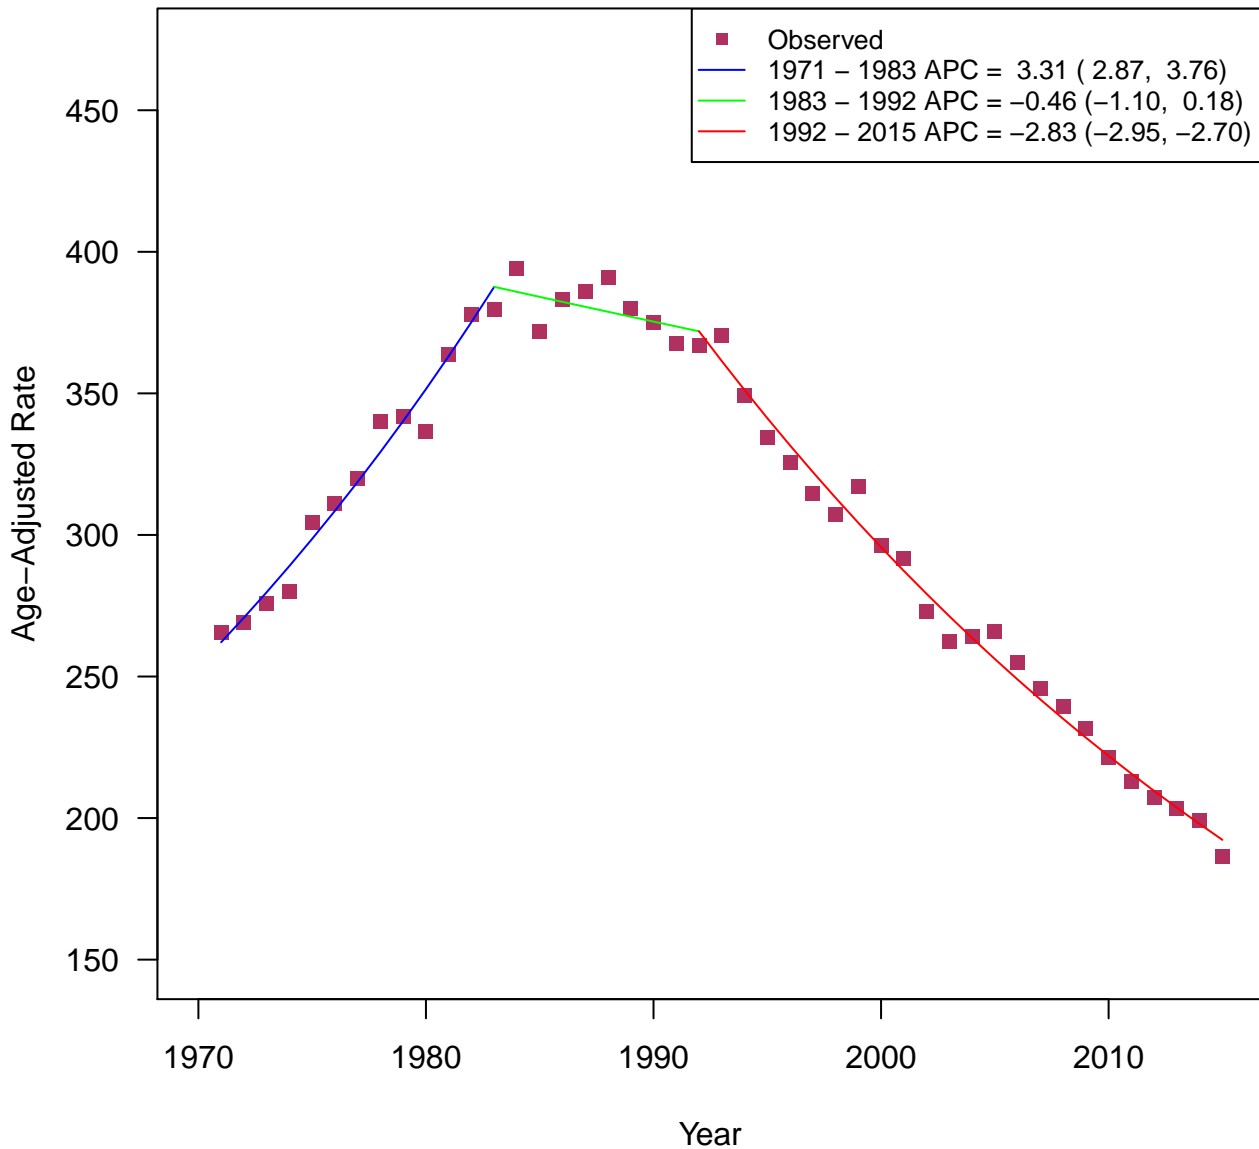

**Figure 234. Age-adjusted incidence rates of lung cancer in males aged 70–79 years in Canada, 1971–2015**

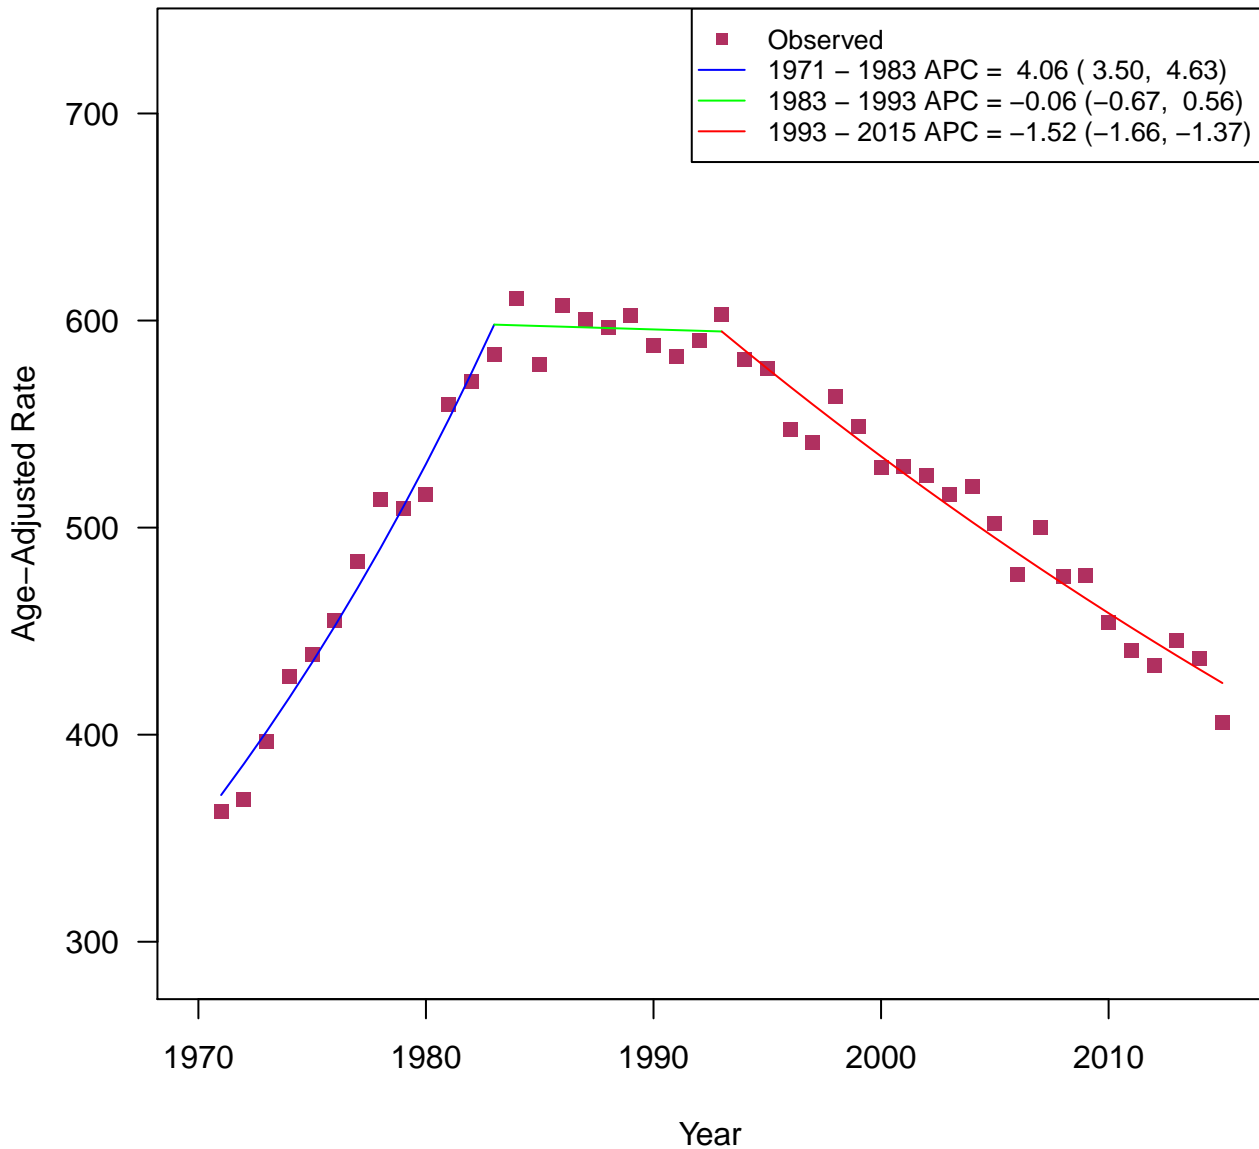

**Figure 235. Age-adjusted incidence rates of lung cancer in males aged 80–89 years in Canada, 1971–2015**

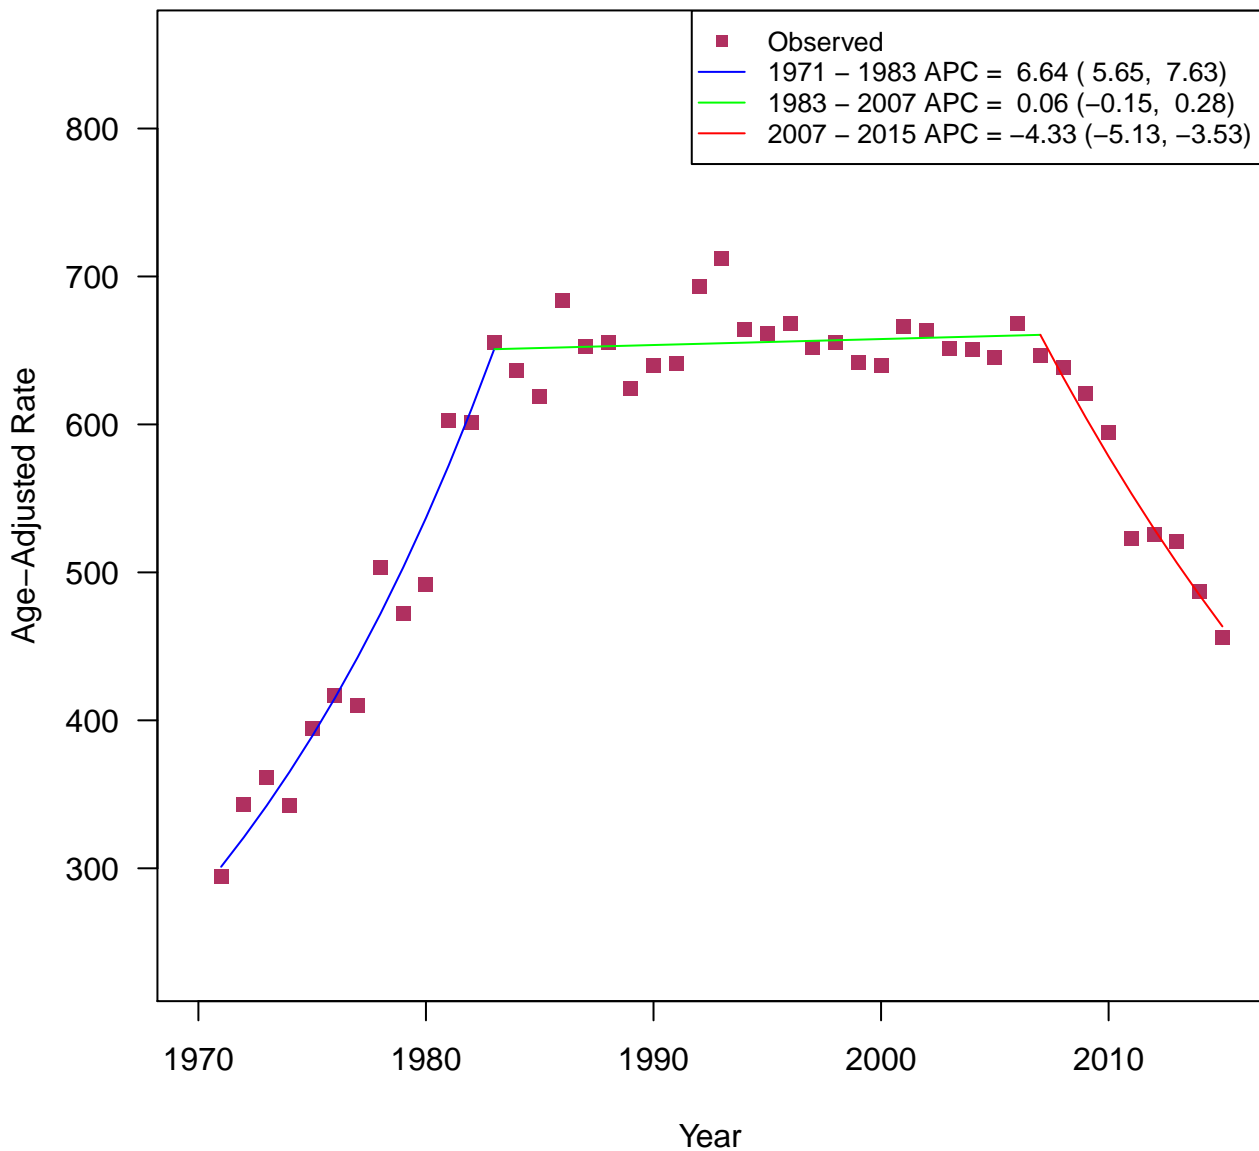



**Figure 236. Age-adjusted incidence rates of lung cancer in females aged 20–29 years in Canada, 1971–2015**

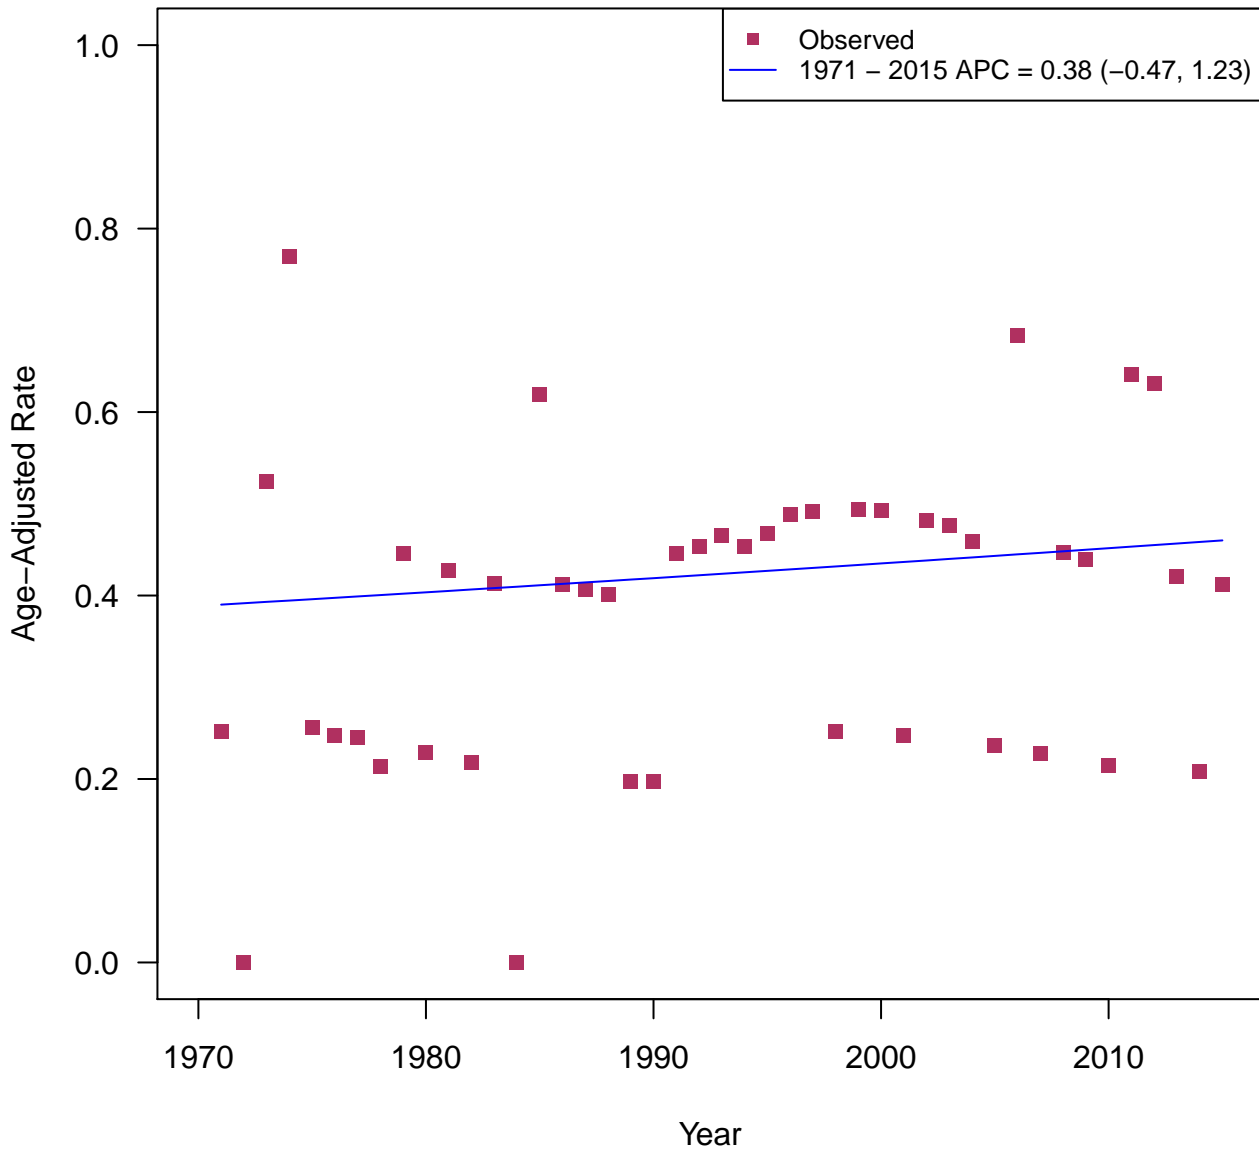

**Figure 237. Age-adjusted incidence rates of lung cancer in females aged 20–39 years in Canada, 1971–2015**

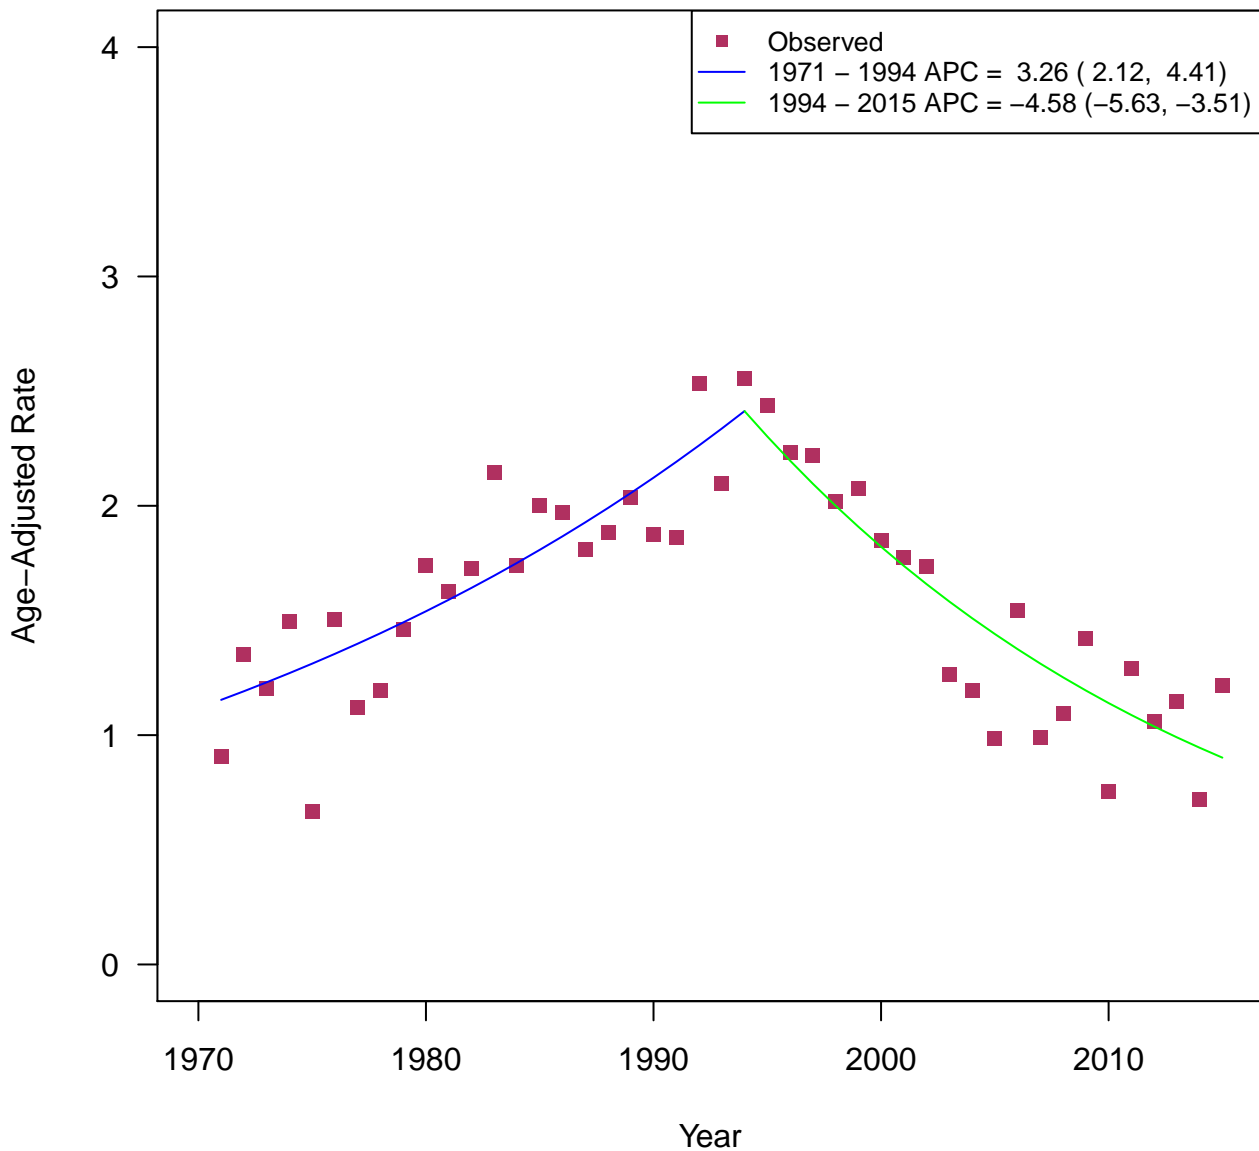

**Figure 238. Age-adjusted incidence rates of lung cancer in females aged 30–39 years in Canada, 1971–2015**

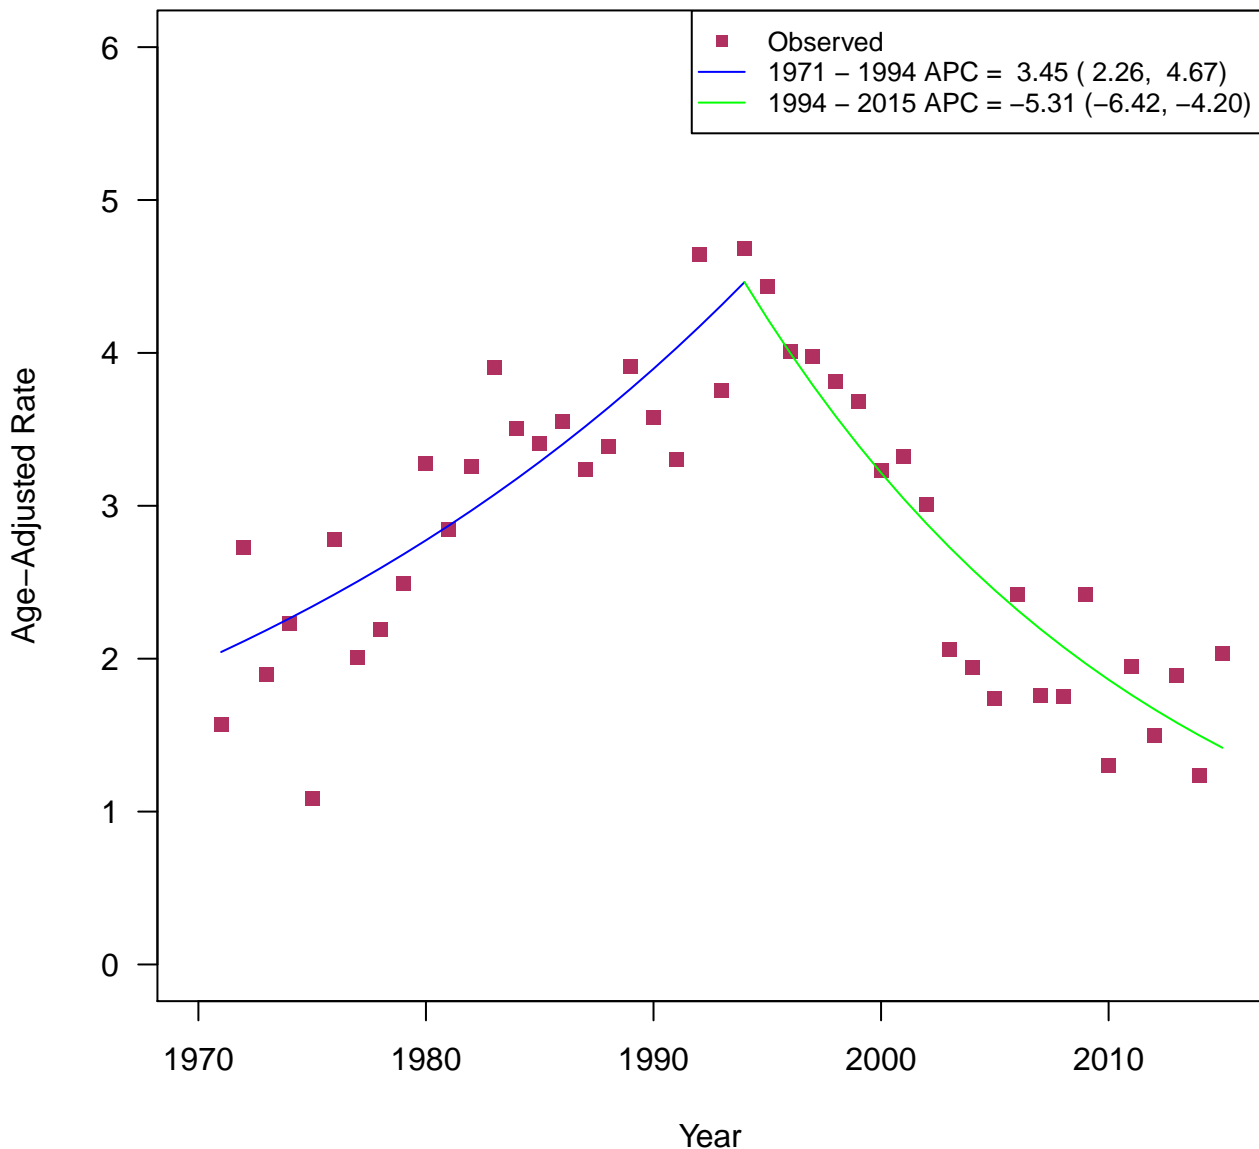

**Figure 239. Age-adjusted incidence rates of lung cancer in females aged 40–49 years in Canada, 1971–2015**

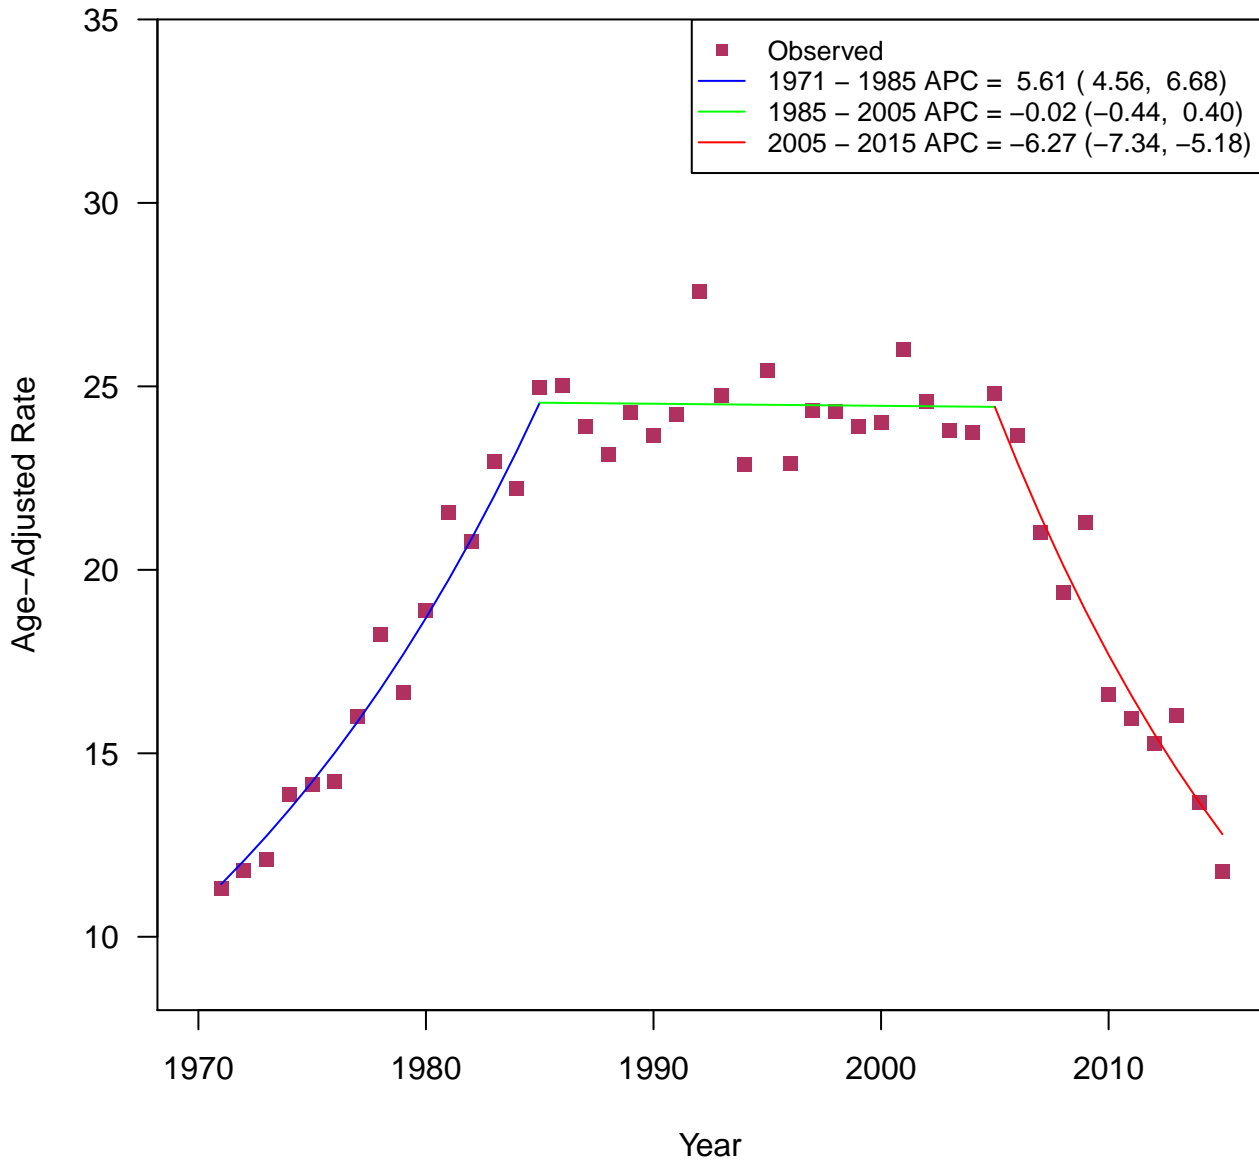

**Figure 240. Age-adjusted incidence rates of lung cancer in females aged 50–59 years in Canada, 1971–2015**

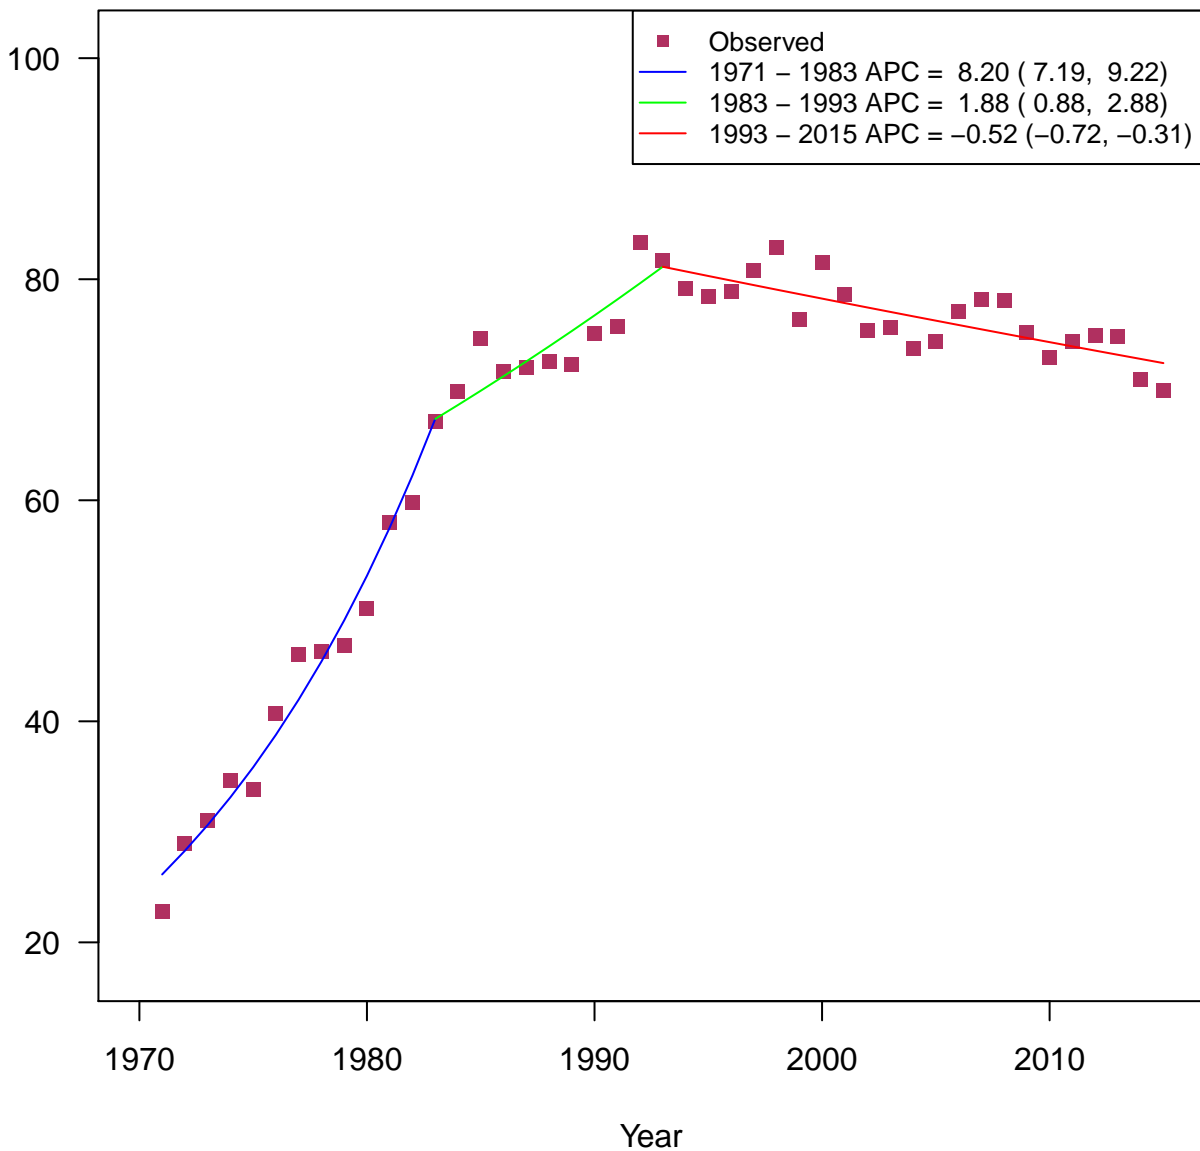

**Figure 241. Age-adjusted incidence rates of lung cancer in females aged 60–69 years in Canada, 1971–2015**

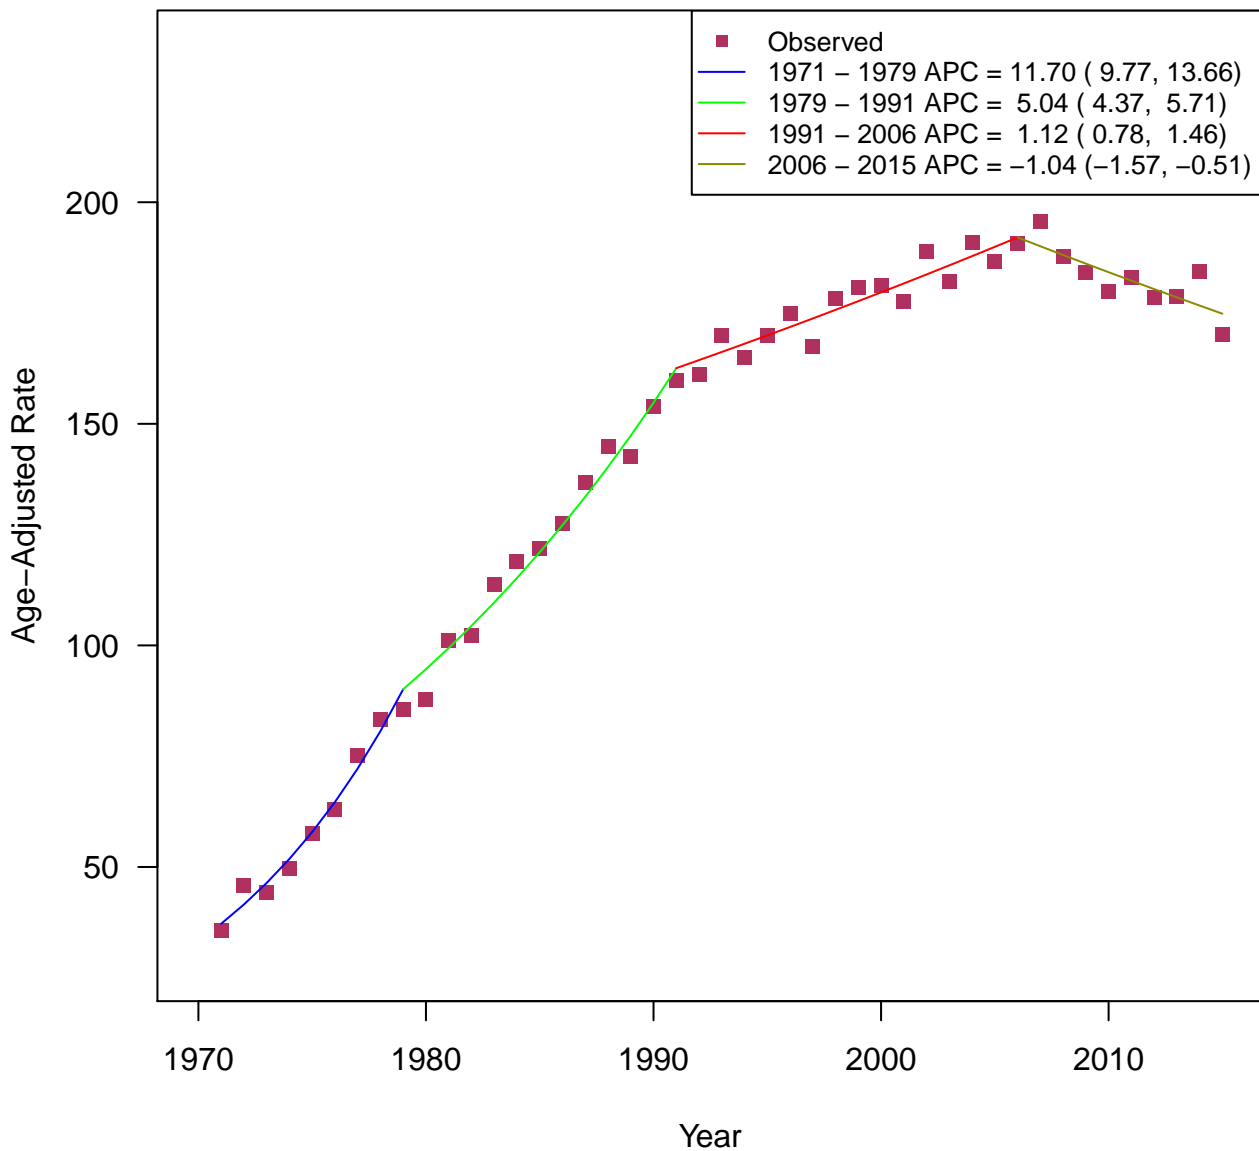

**Figure 242. Age-adjusted incidence rates of lung cancer in females aged 70–79 years in Canada, 1971–2015**

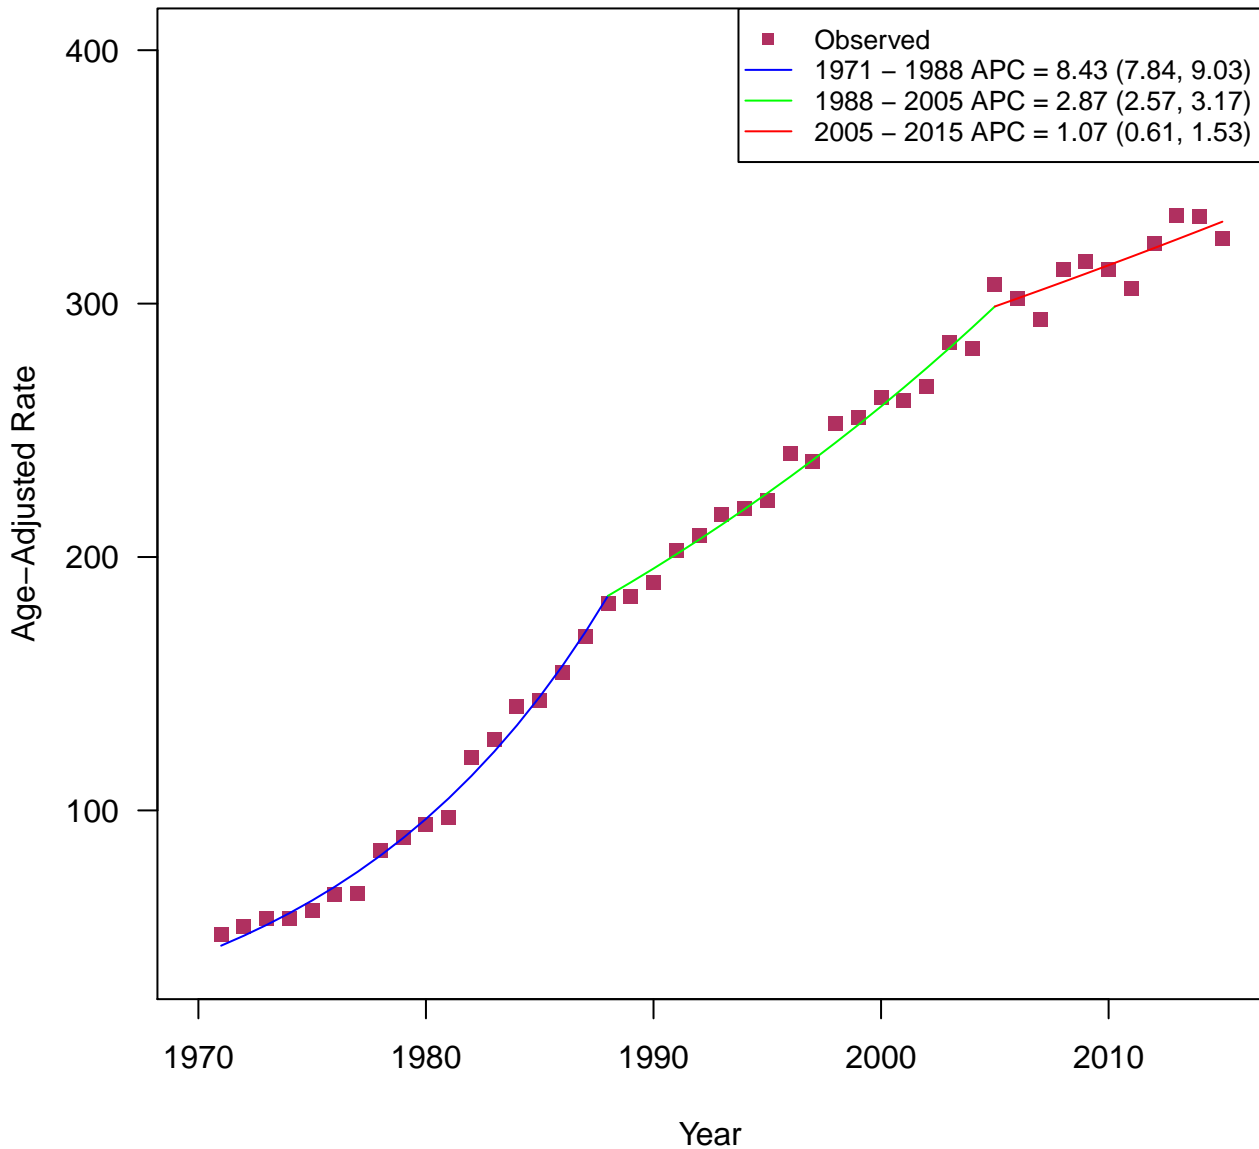

**Figure 243. Age-adjusted incidence rates of lung cancer in females aged 80–89 years in Canada, 1971–2015**

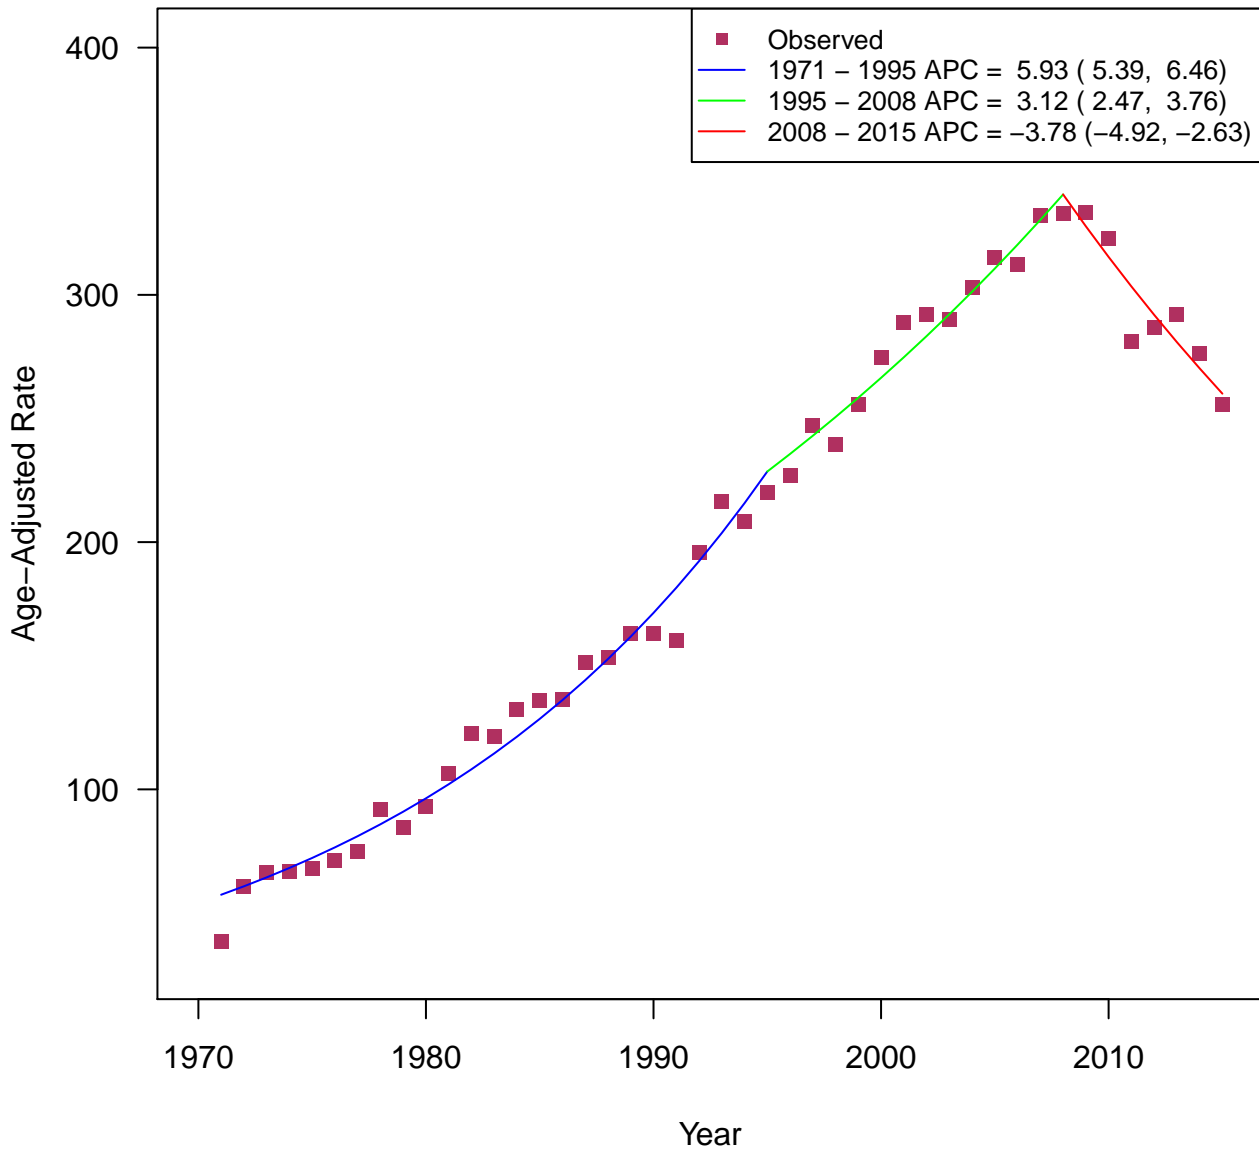



**Figure 244. Age-adjusted incidence rates of multiple myeloma in males aged 20–29 years in Canada, 1971–2015**

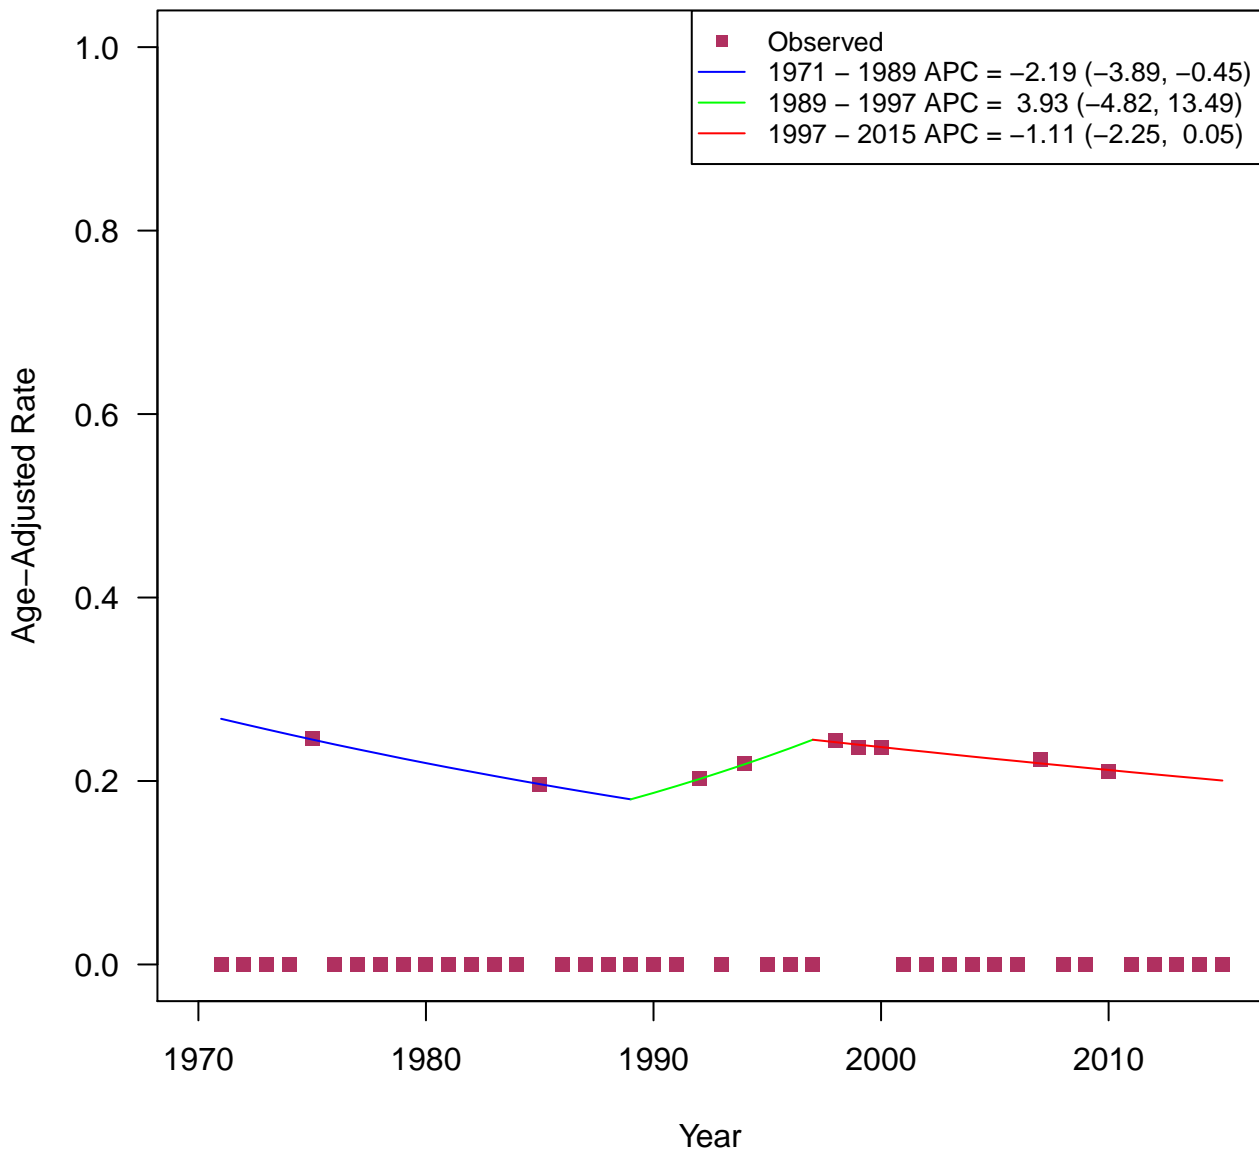

**Figure 245. Age-adjusted incidence rates of multiple myeloma in males aged 20–39 years in Canada, 1971–2015**

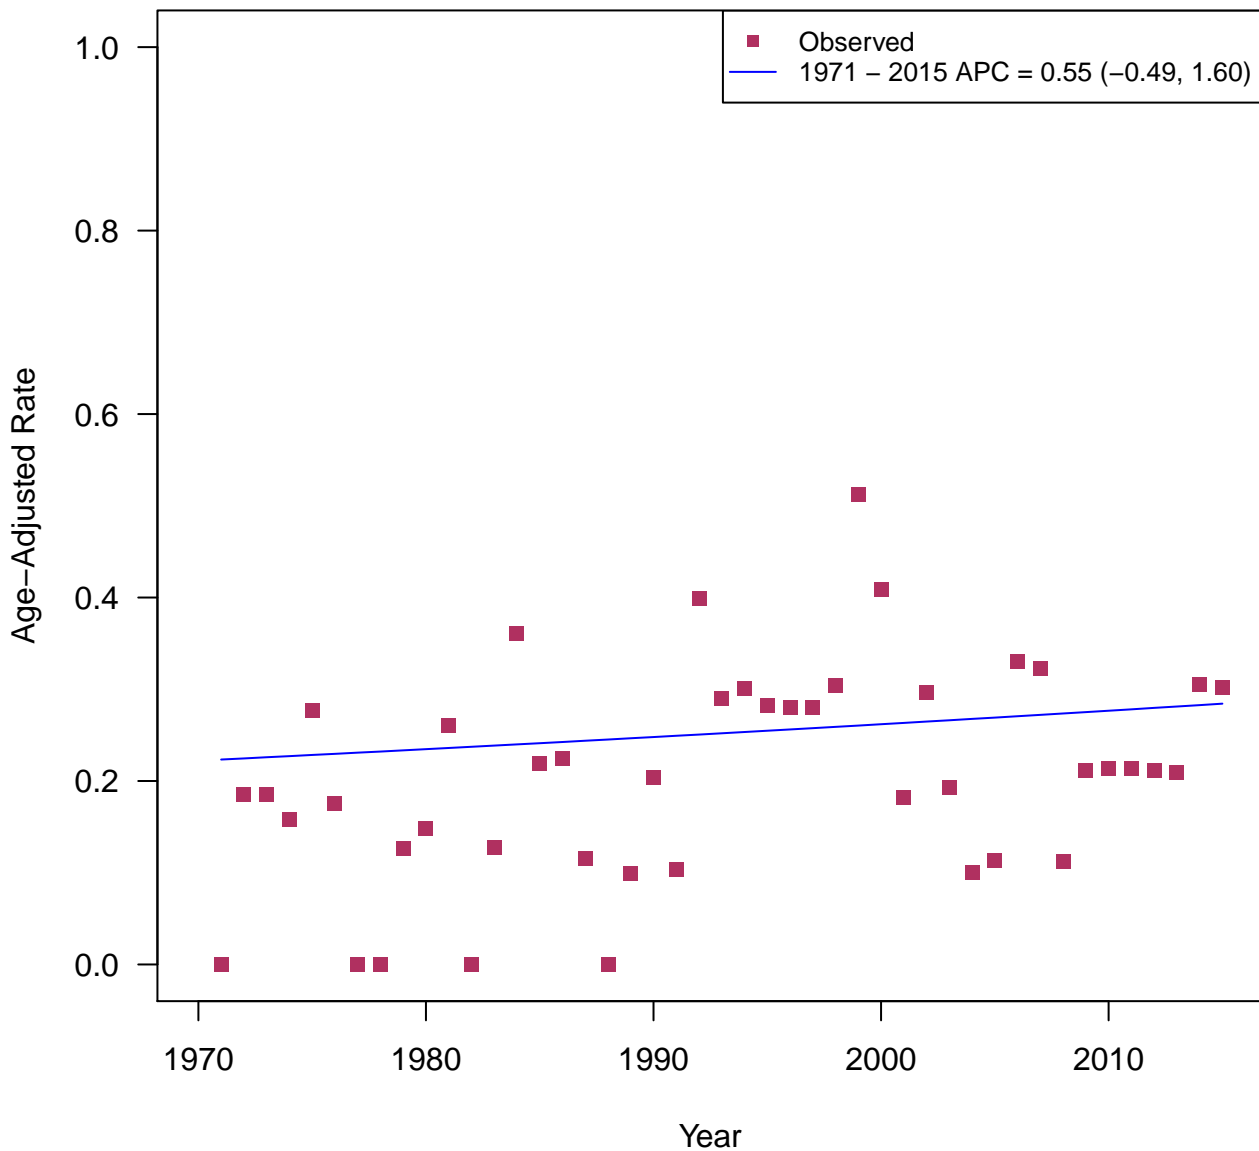

**Figure 246. Age-adjusted incidence rates of multiple myeloma in males aged 20–49 years in Canada, 1971–2015**

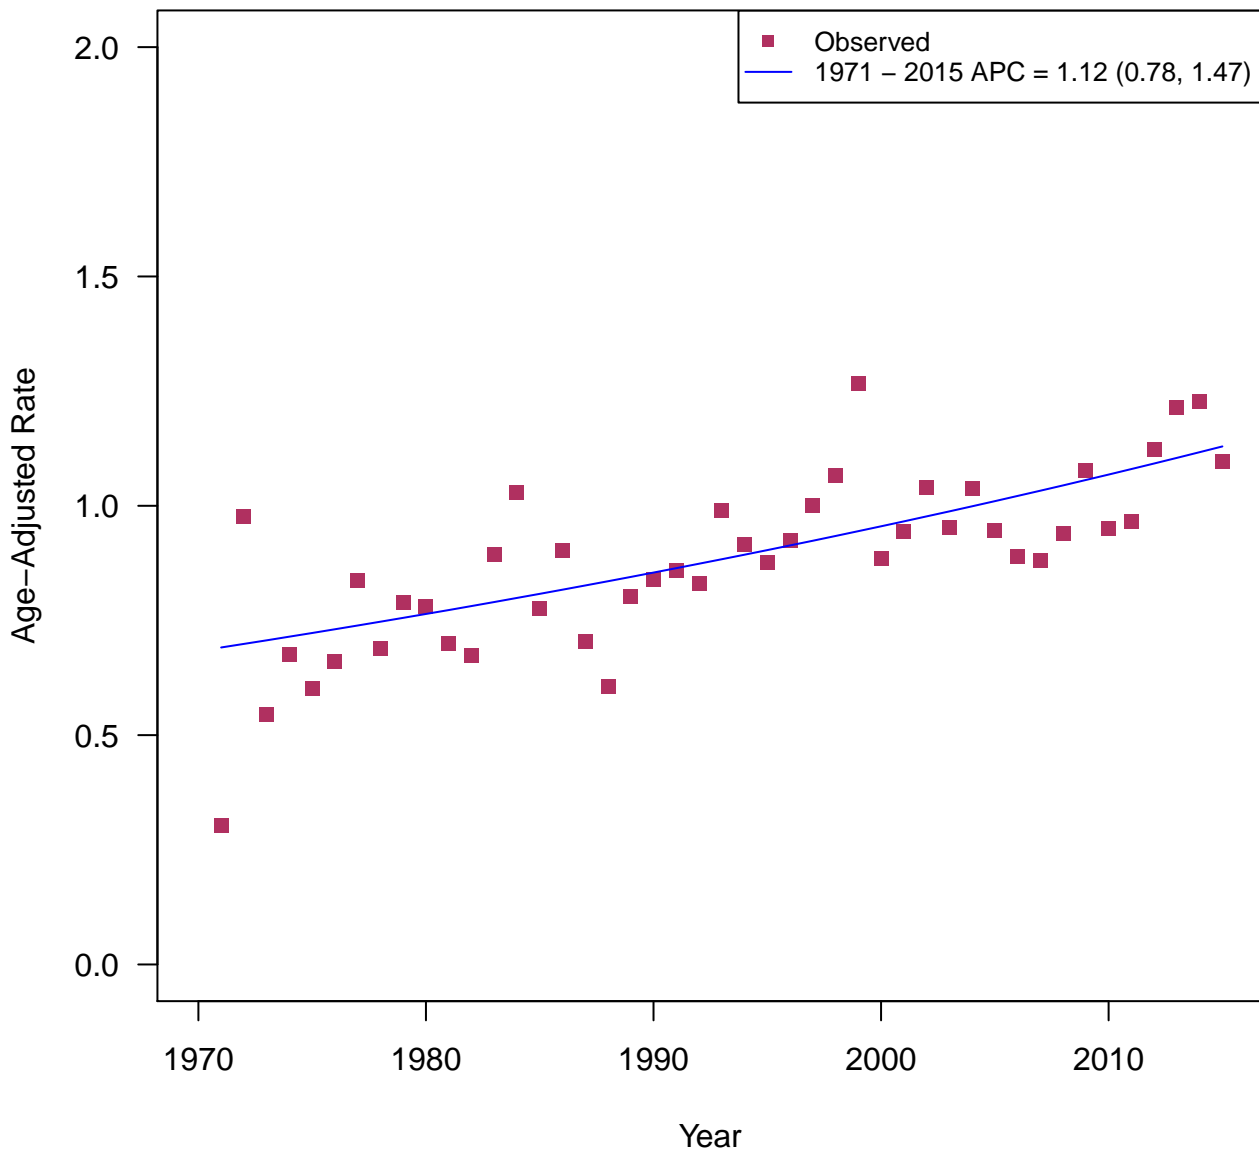

**Figure 247. Age-adjusted incidence rates of multiple myeloma in males aged 30–39 years in Canada, 1971–2015**

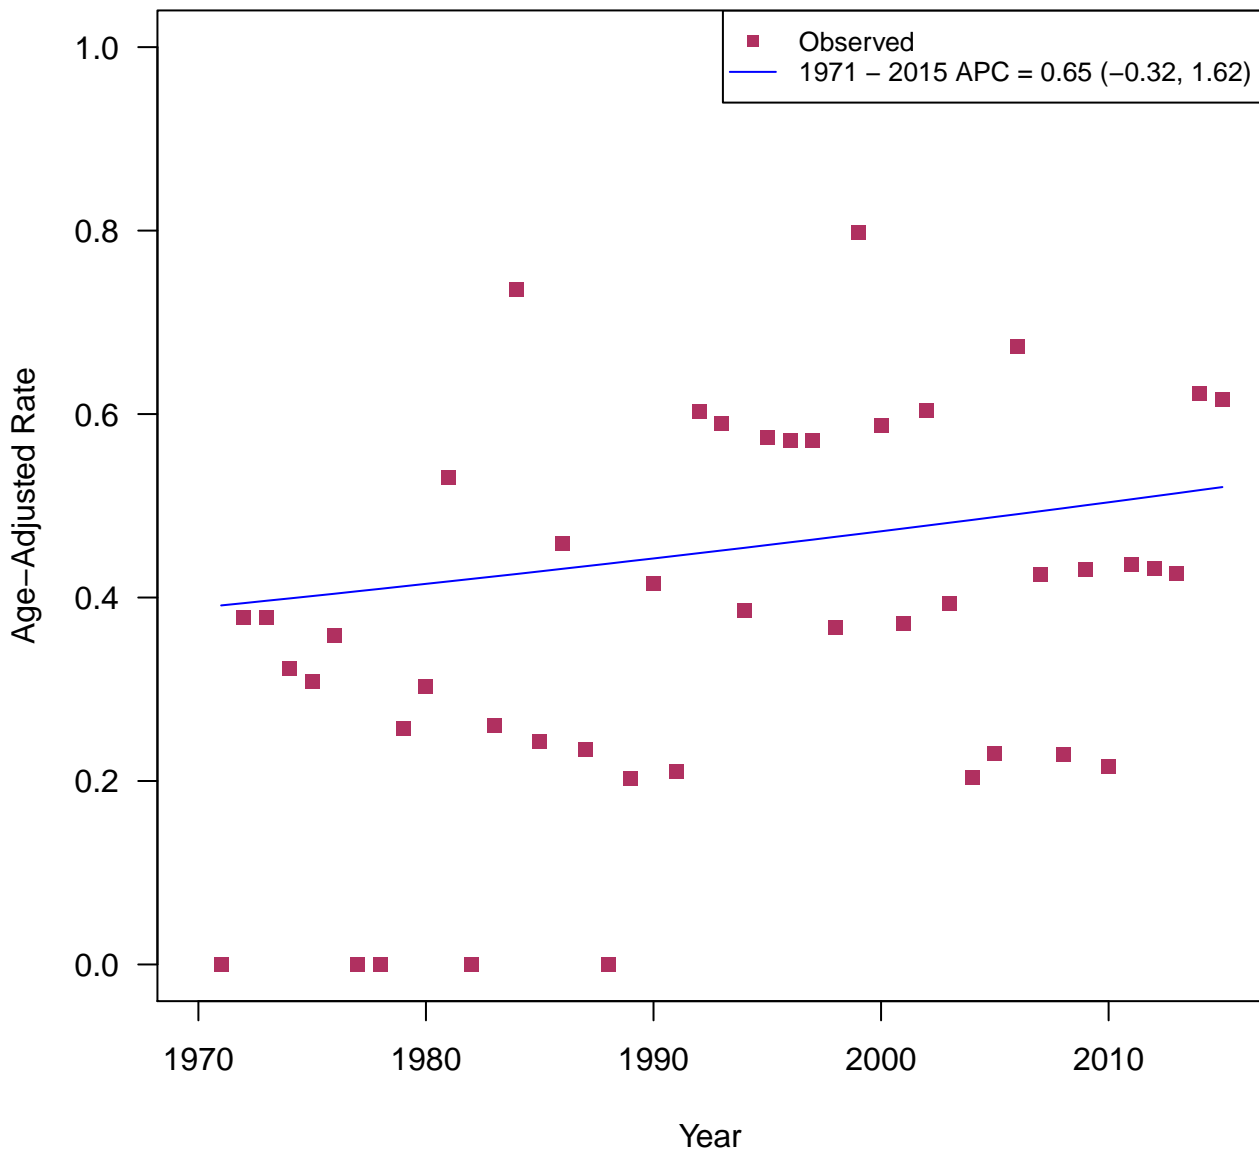

**Figure 248. Age-adjusted incidence rates of multiple myeloma in males aged 40–49 years in Canada, 1971–2015**

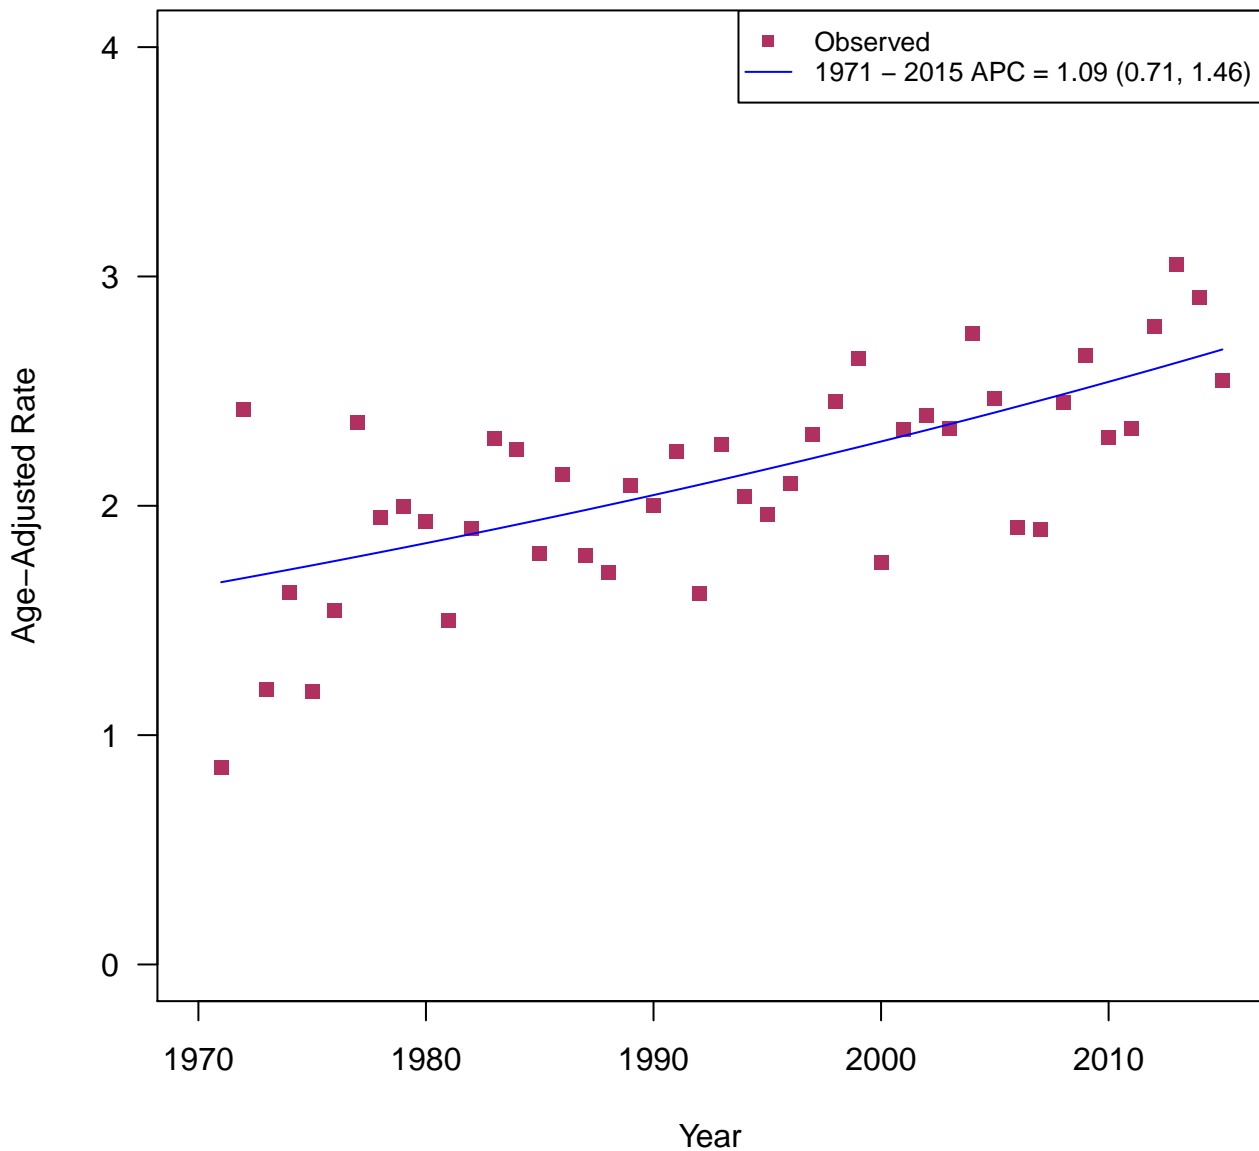

**Figure 249. Age-adjusted incidence rates of multiple myeloma in males aged 50–59 years in Canada, 1971–2015**

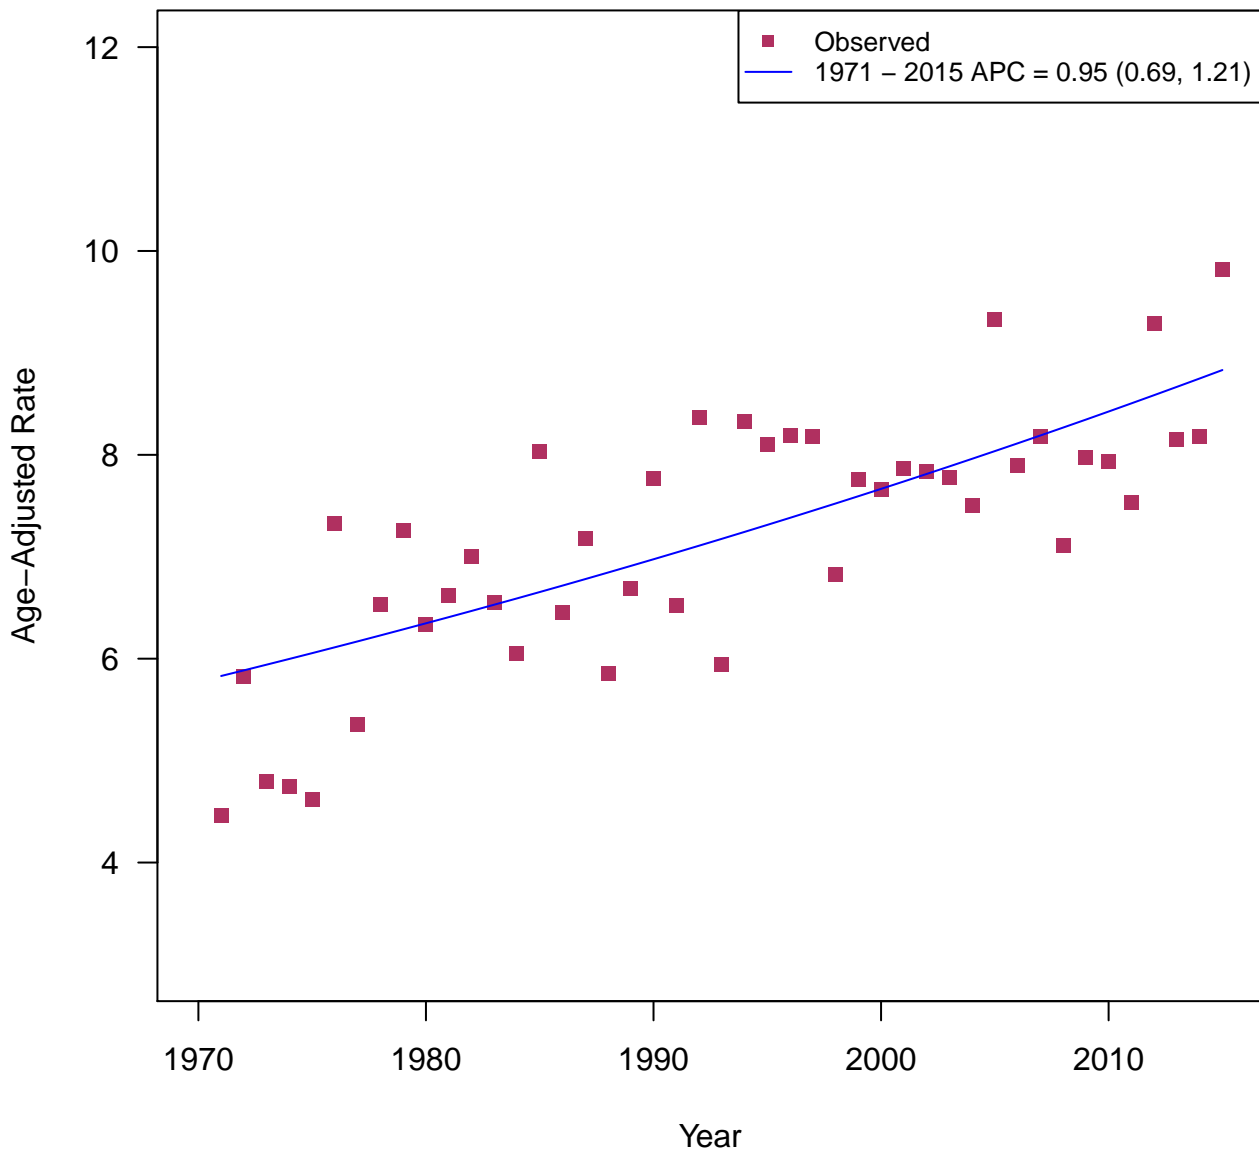

**Figure 250. Age-adjusted incidence rates of multiple myeloma in males aged 60–69 years in Canada, 1971–2015**

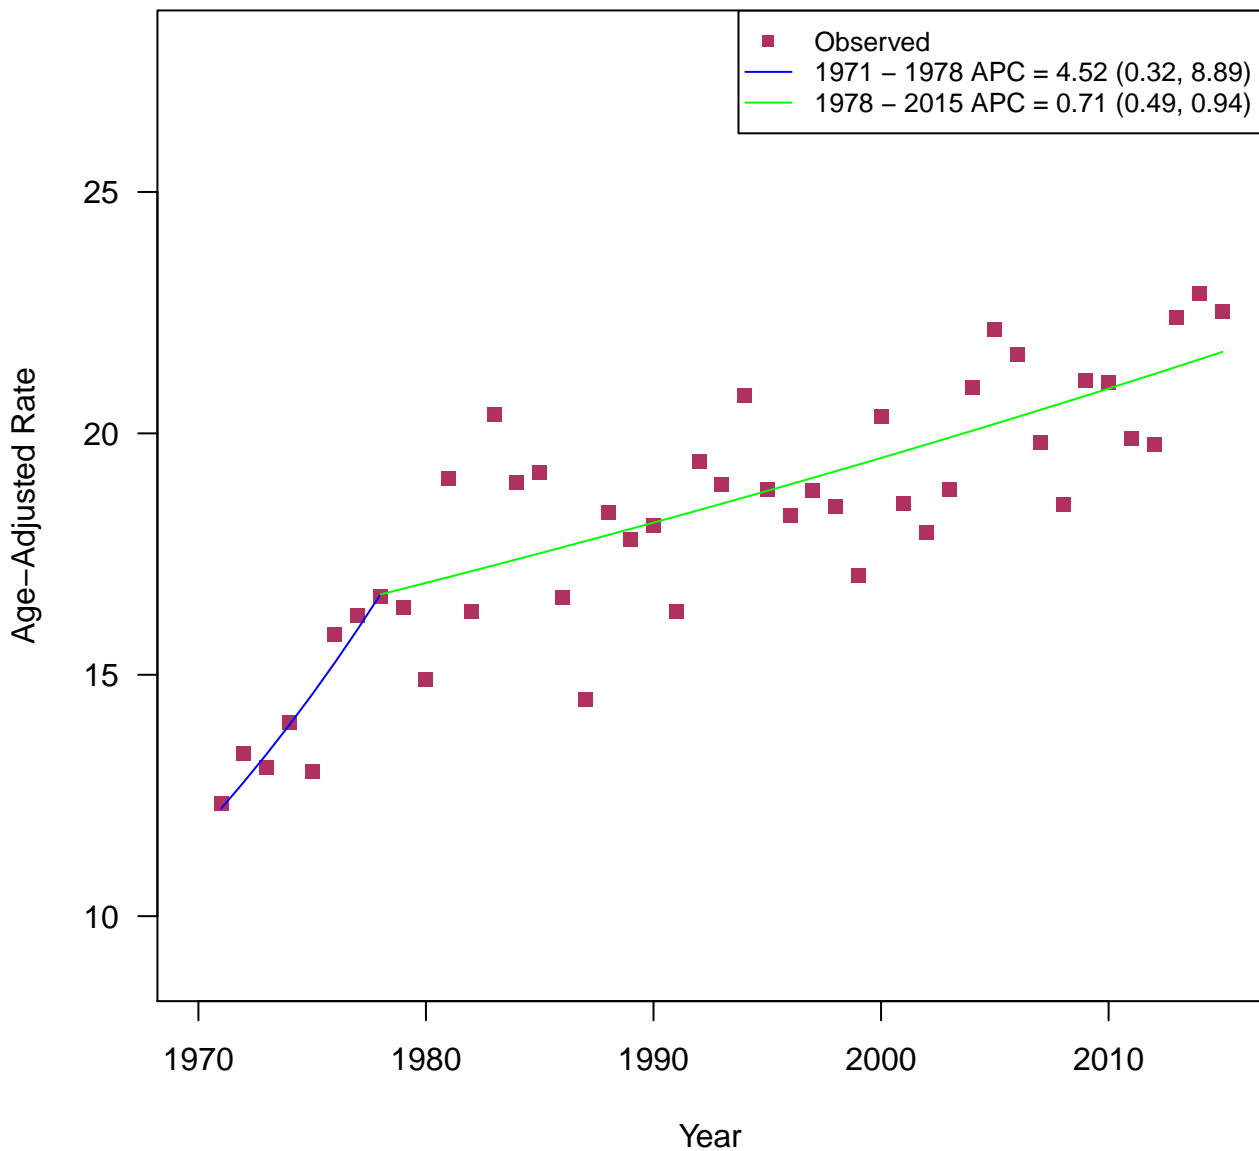

**Figure 251. Age-adjusted incidence rates of multiple myeloma in males aged 70–79 years in Canada, 1971–2015**

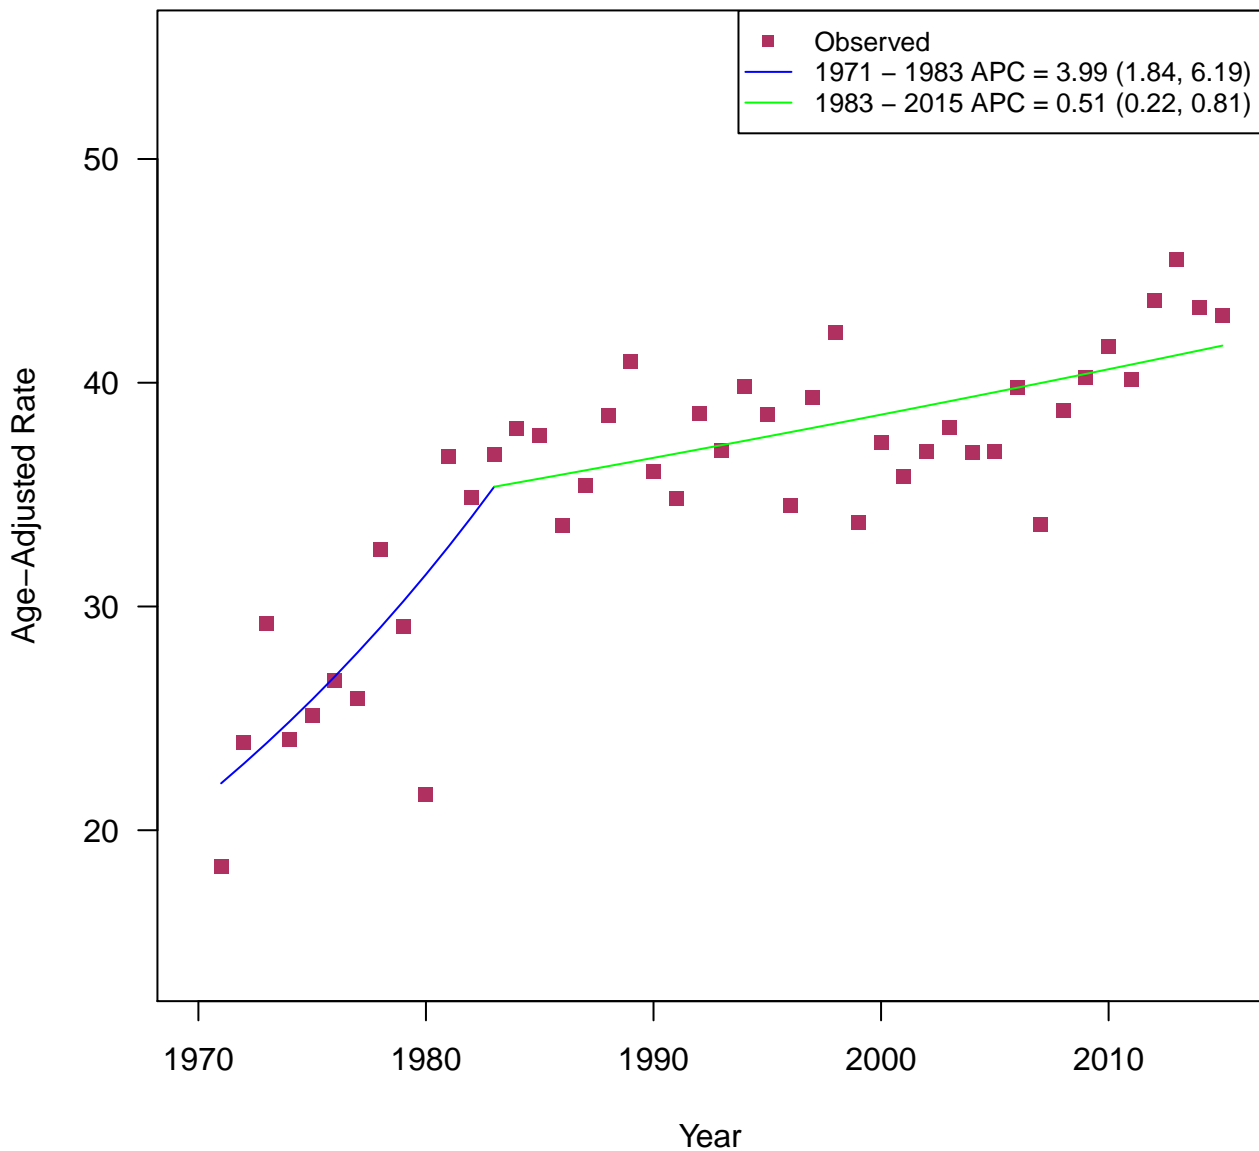



**Figure 252. Age-adjusted incidence rates of multiple myeloma in males aged 80–89 years in Canada, 1971–2015**

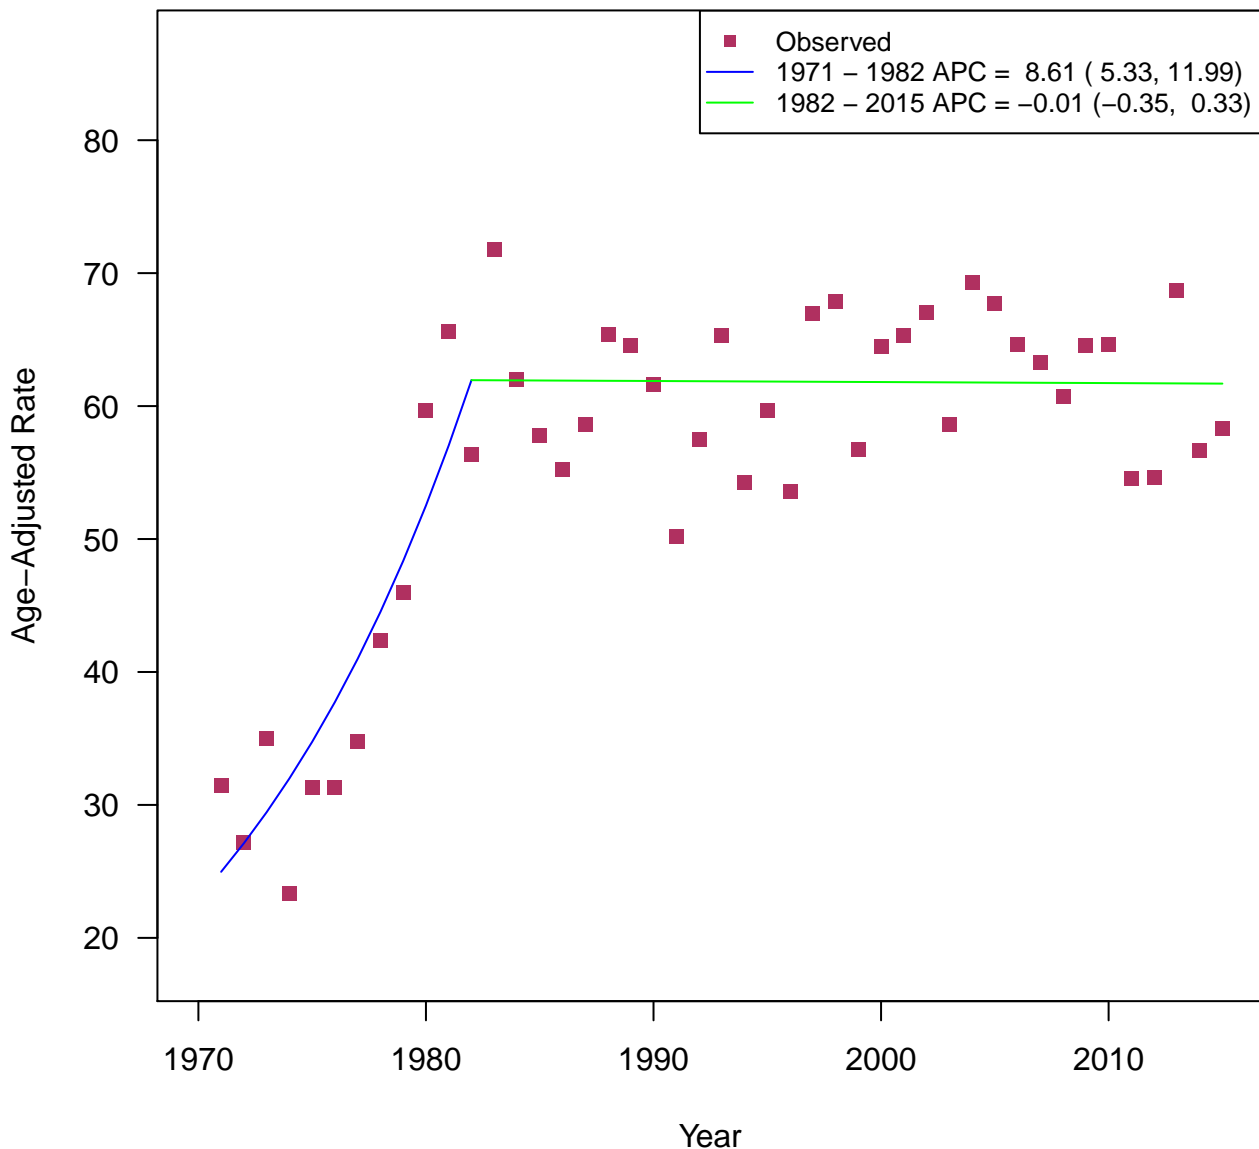

**Figure 253. Age-adjusted incidence rates of multiple myeloma in females aged 20–29 years in Canada, 1971–2015**

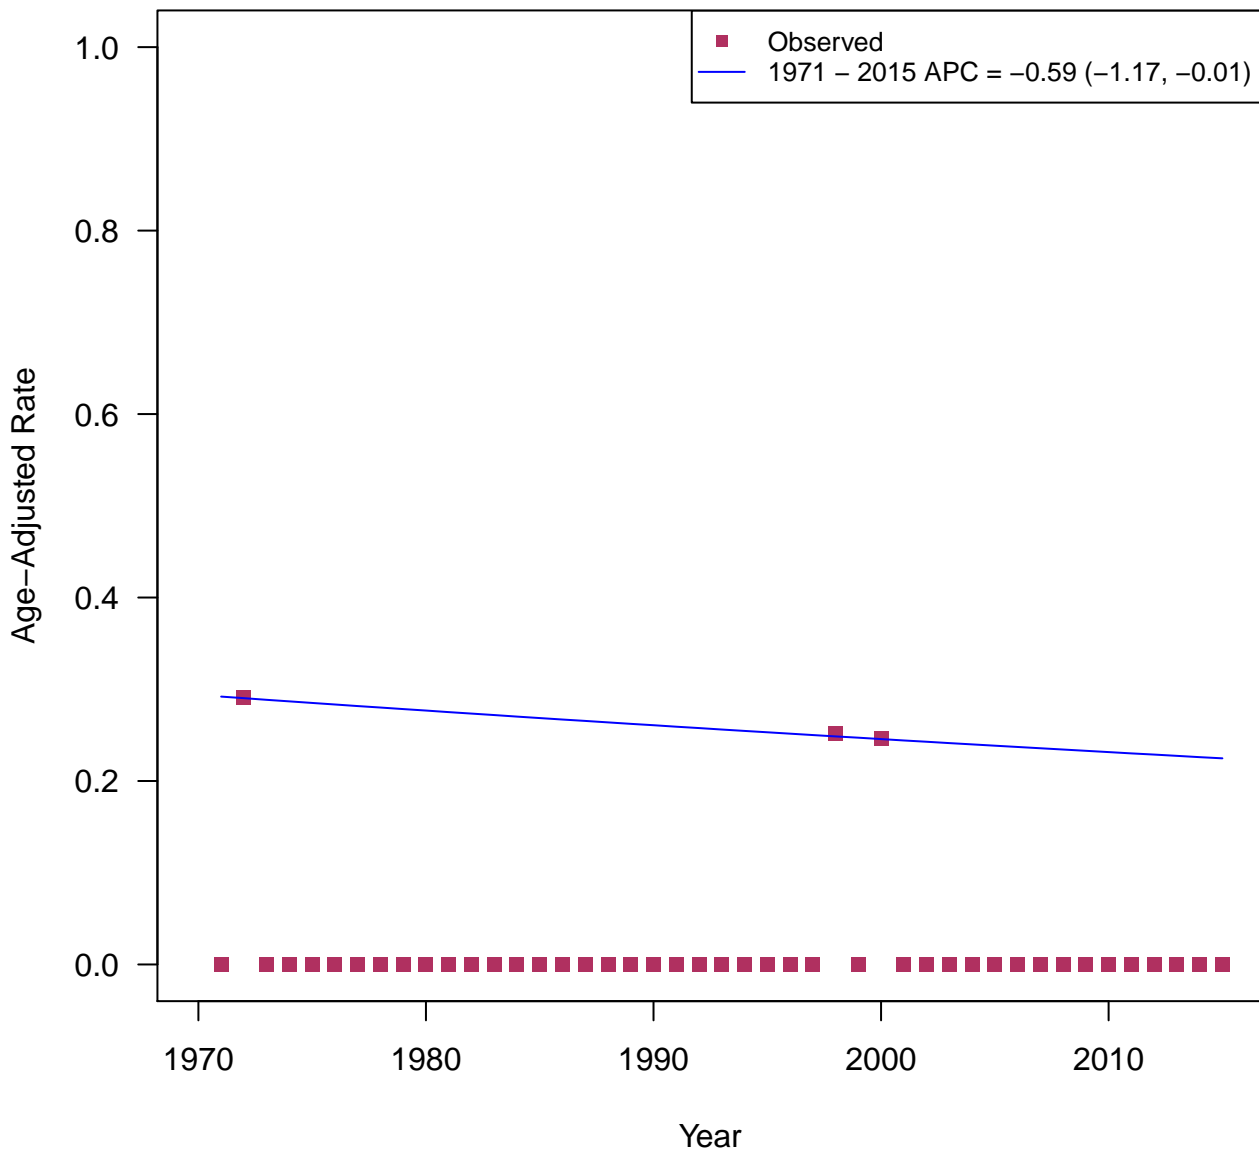

**Figure 254. Age-adjusted incidence rates of multiple myeloma in females aged 20–39 years in Canada, 1971–2015**

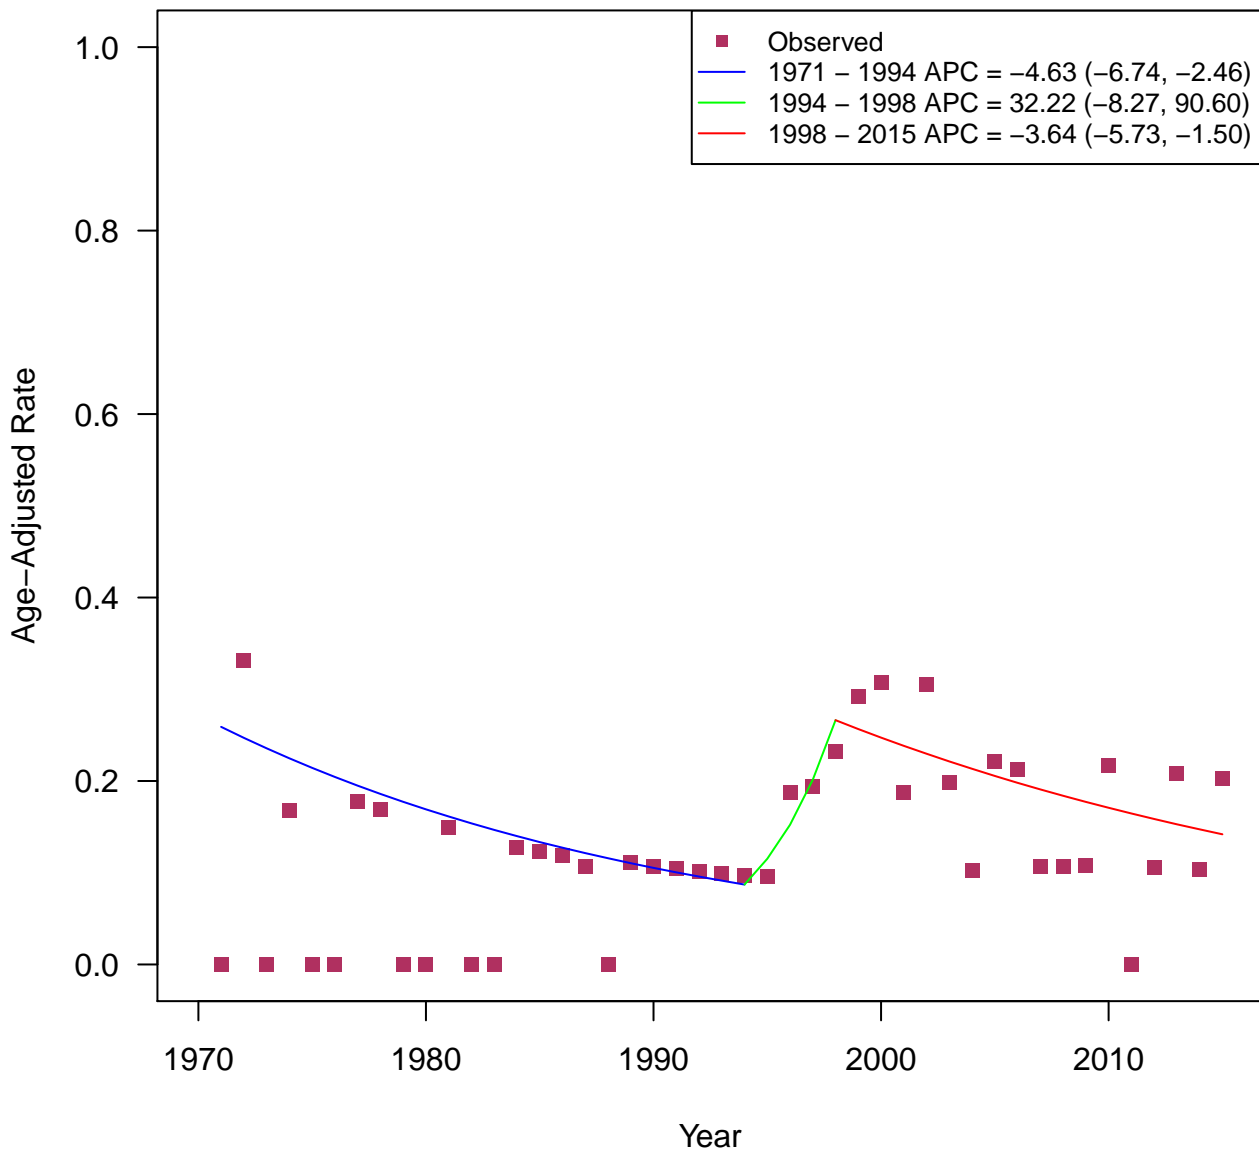

**Figure 255. Age-adjusted incidence rates of multiple myeloma in females aged 20–49 years in Canada, 1971–2015**

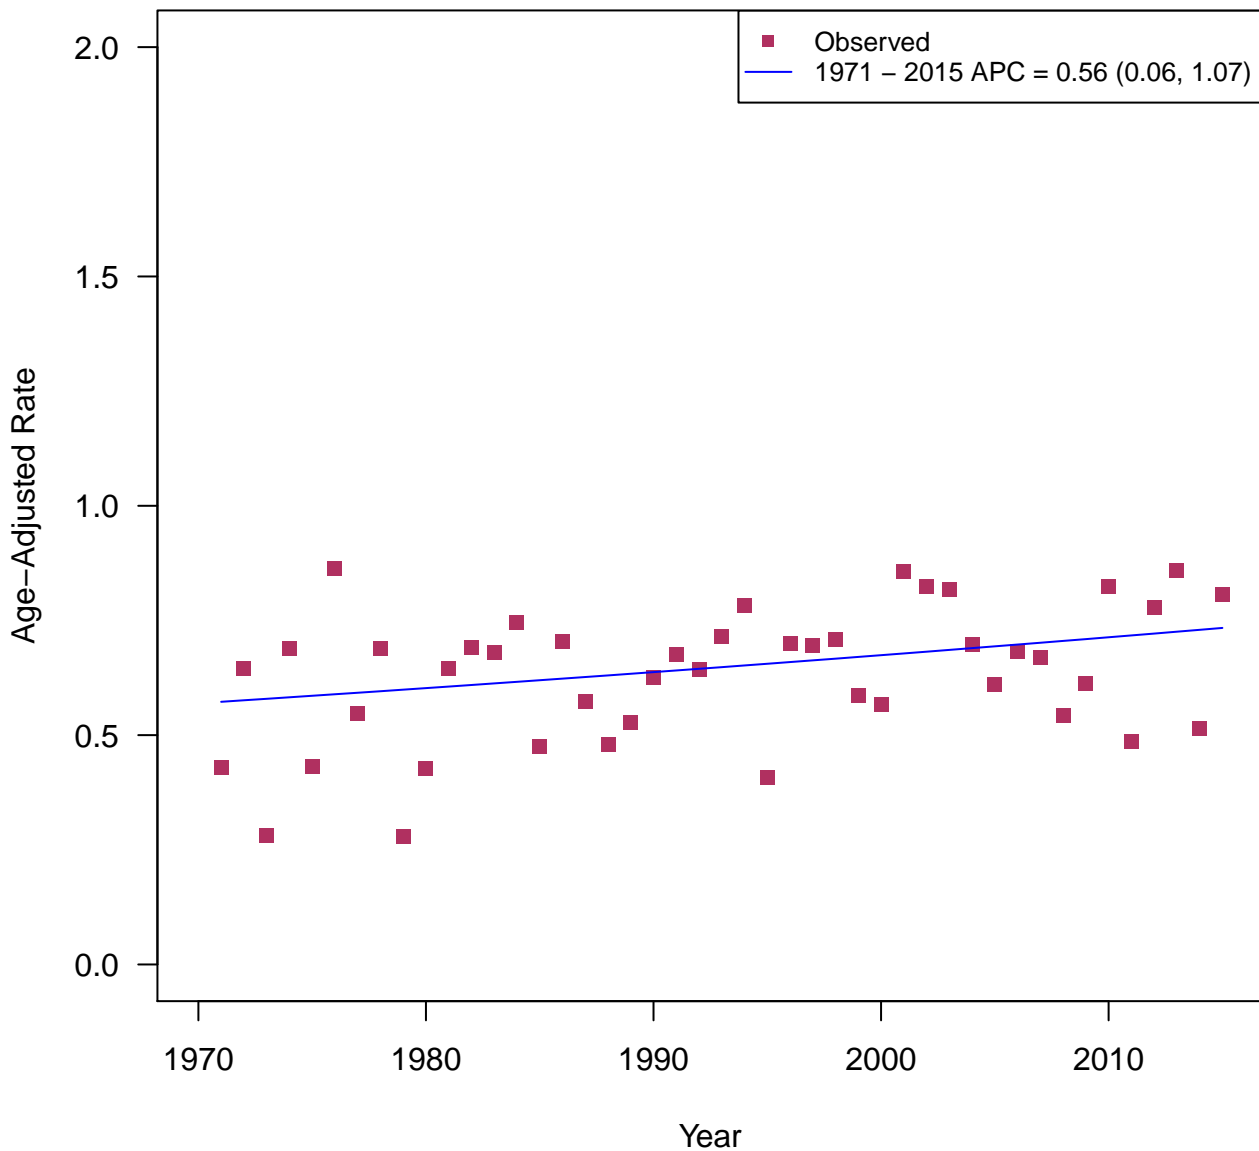

**Figure 256. Age-adjusted incidence rates of multiple myeloma in females aged 30–39 years in Canada, 1971–2015**

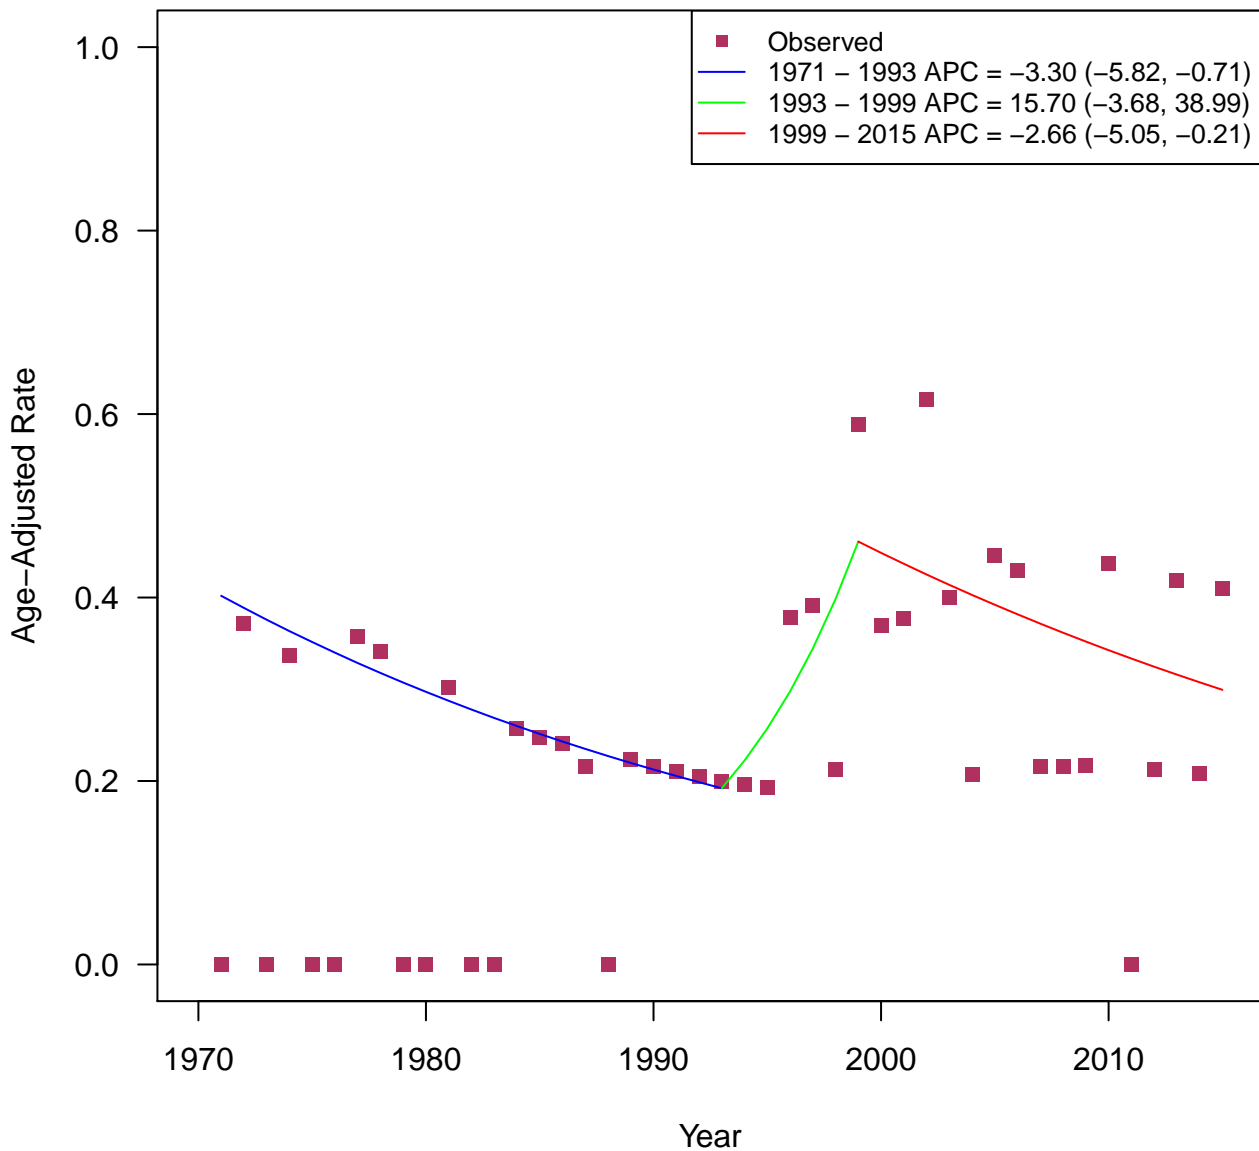

**Figure 257. Age-adjusted incidence rates of multiple myeloma in females aged 40–49 years in Canada, 1971–2015**

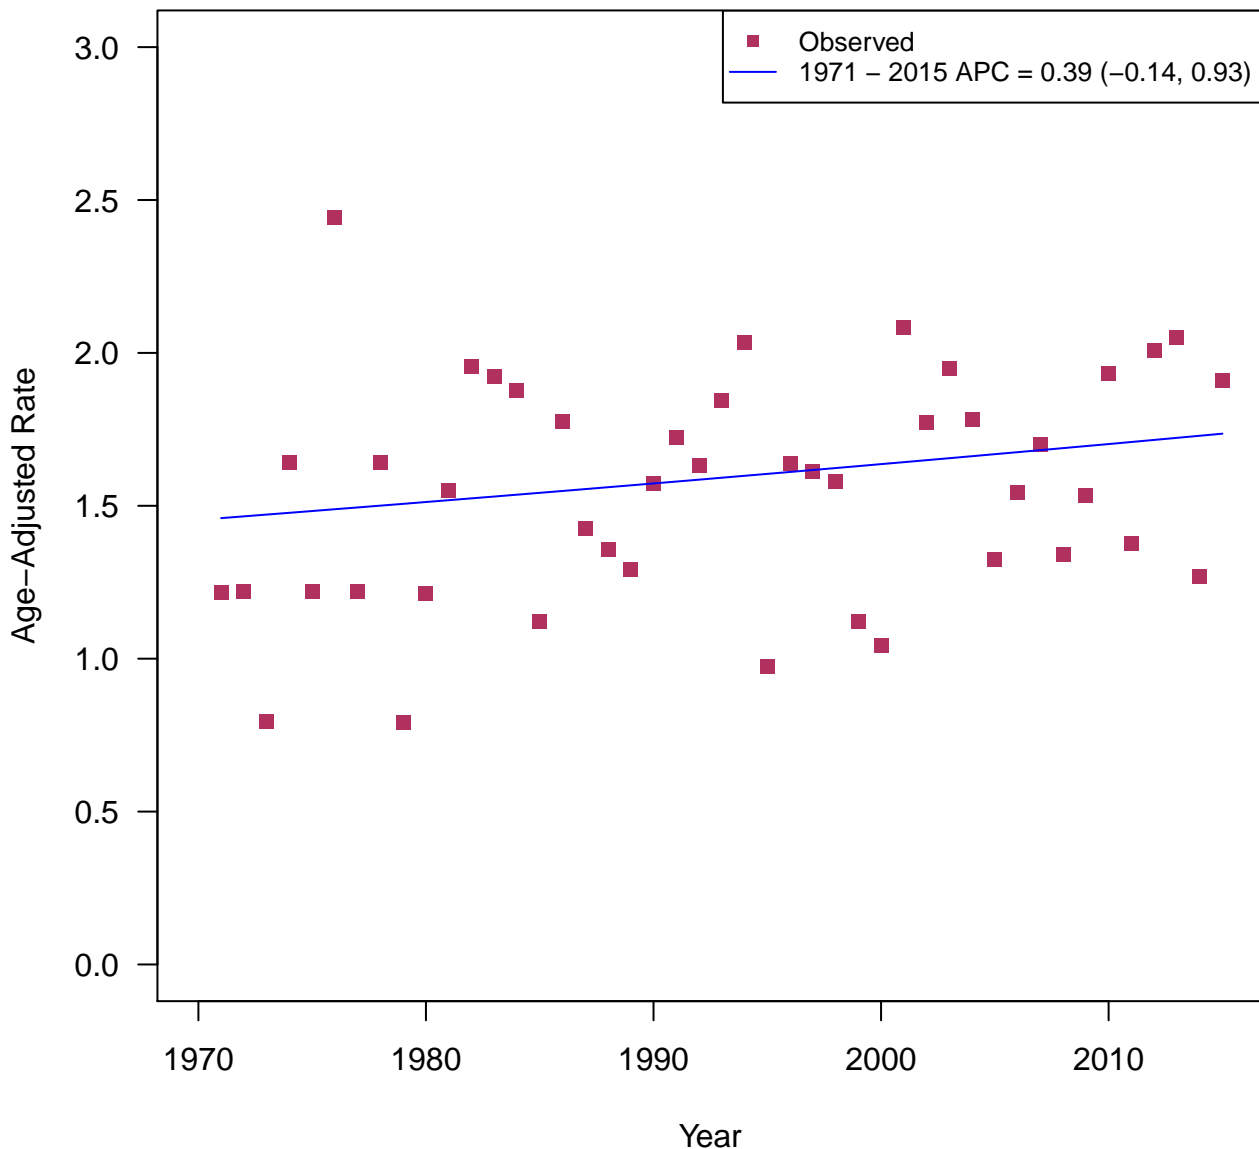

**Figure 258. Age-adjusted incidence rates of multiple myeloma in females aged 50–59 years in Canada, 1971–2015**

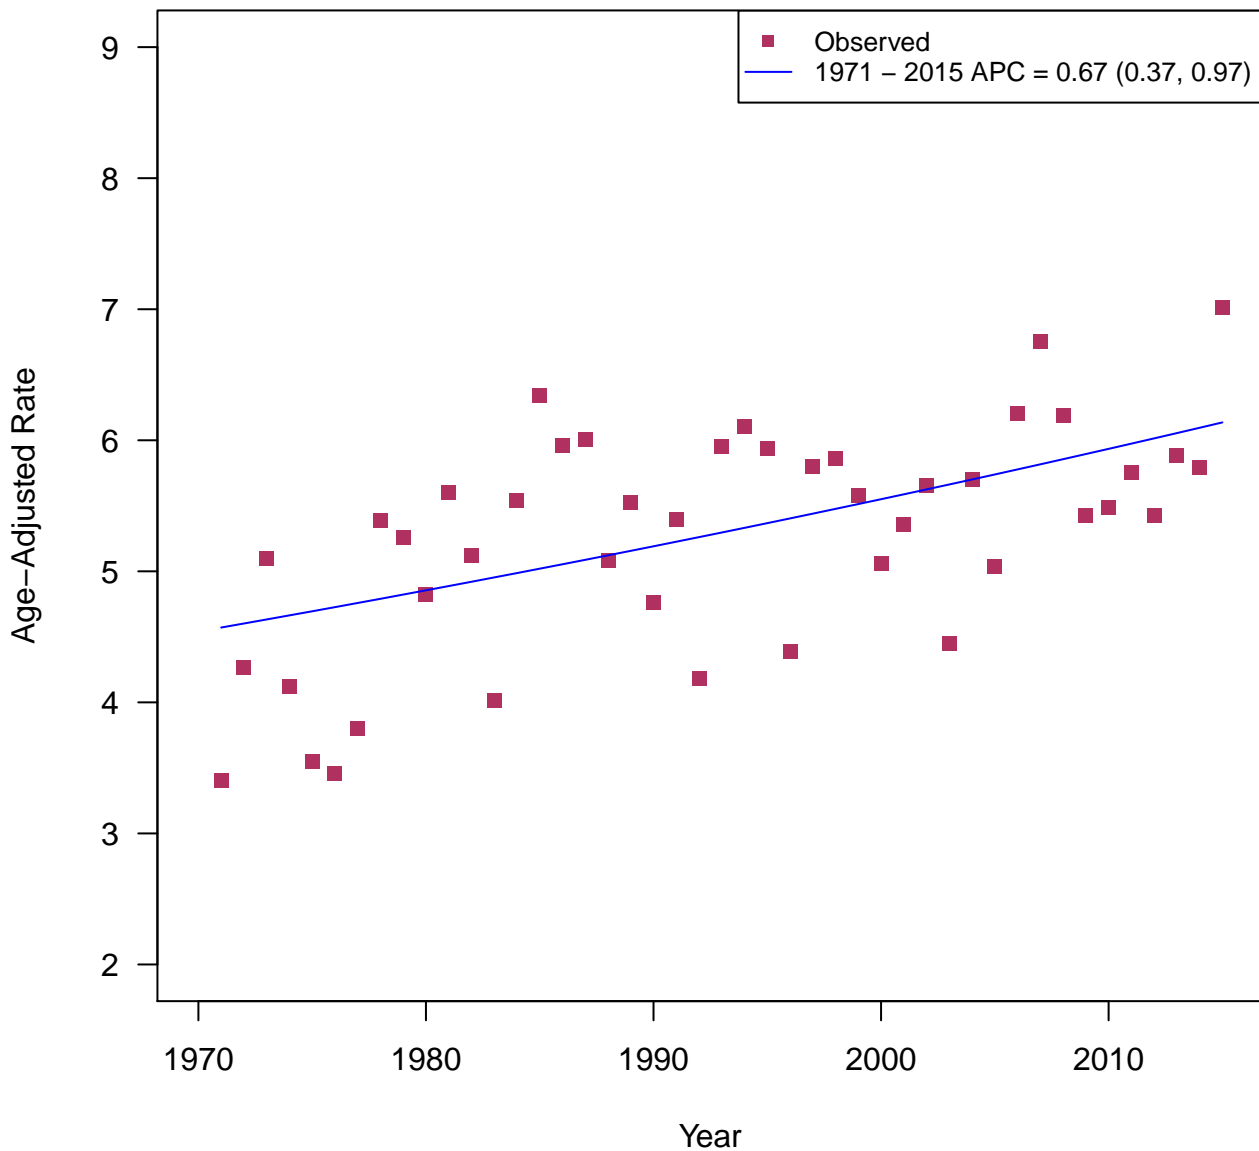

**Figure 259. Age-adjusted incidence rates of multiple myeloma in females aged 60–69 years in Canada, 1971–2015**

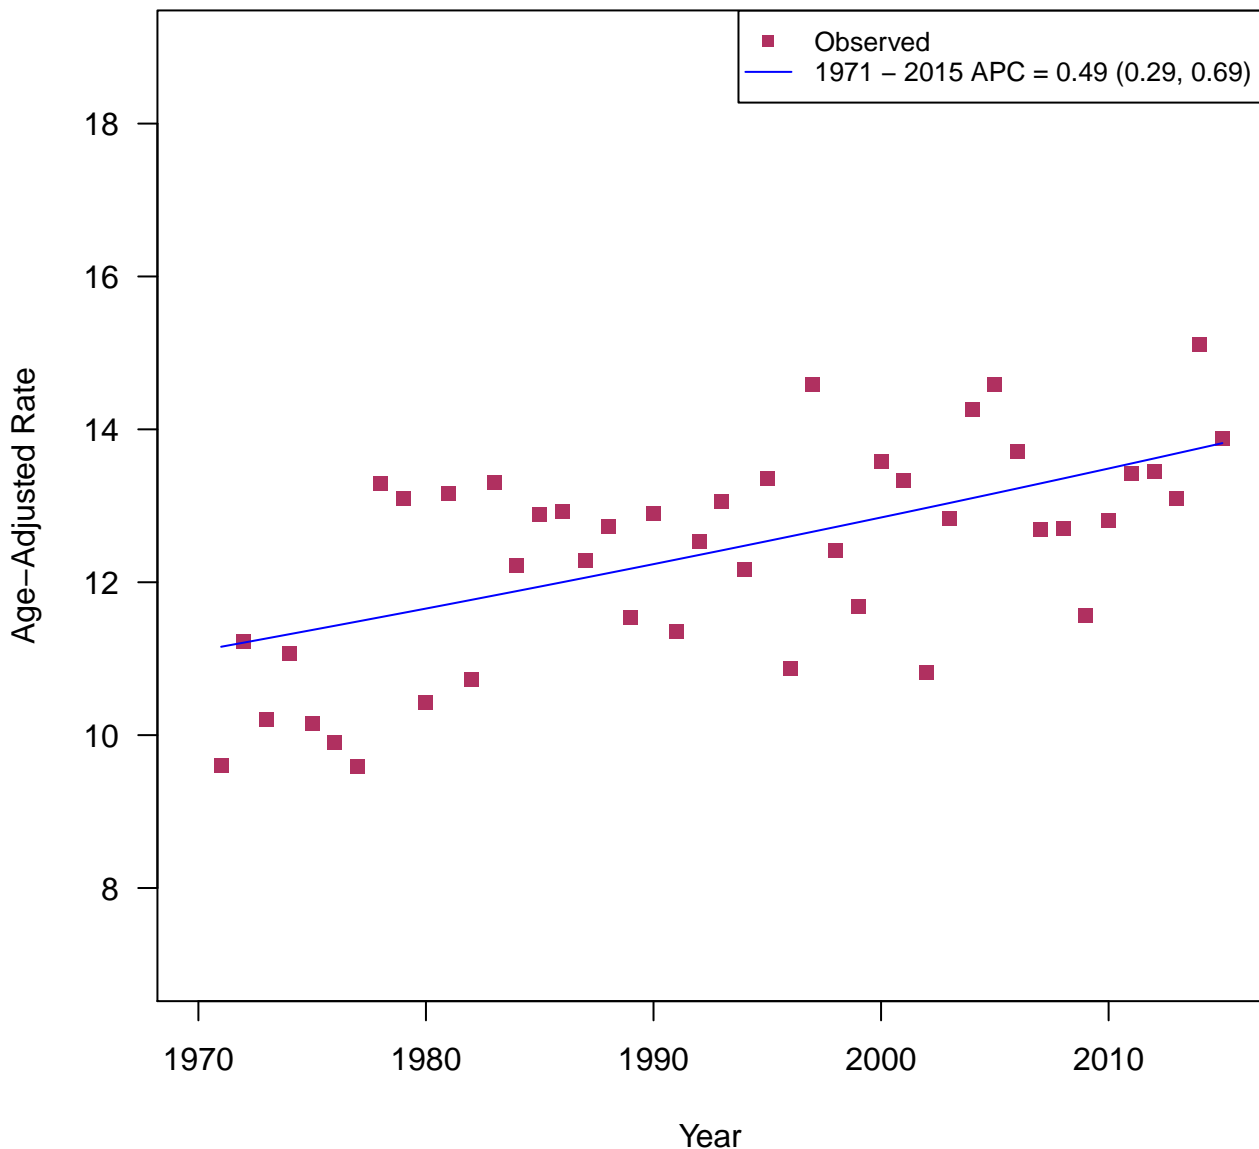



**Figure 260. Age-adjusted incidence rates of multiple myeloma in females aged 70–79 years in Canada, 1971–2015**

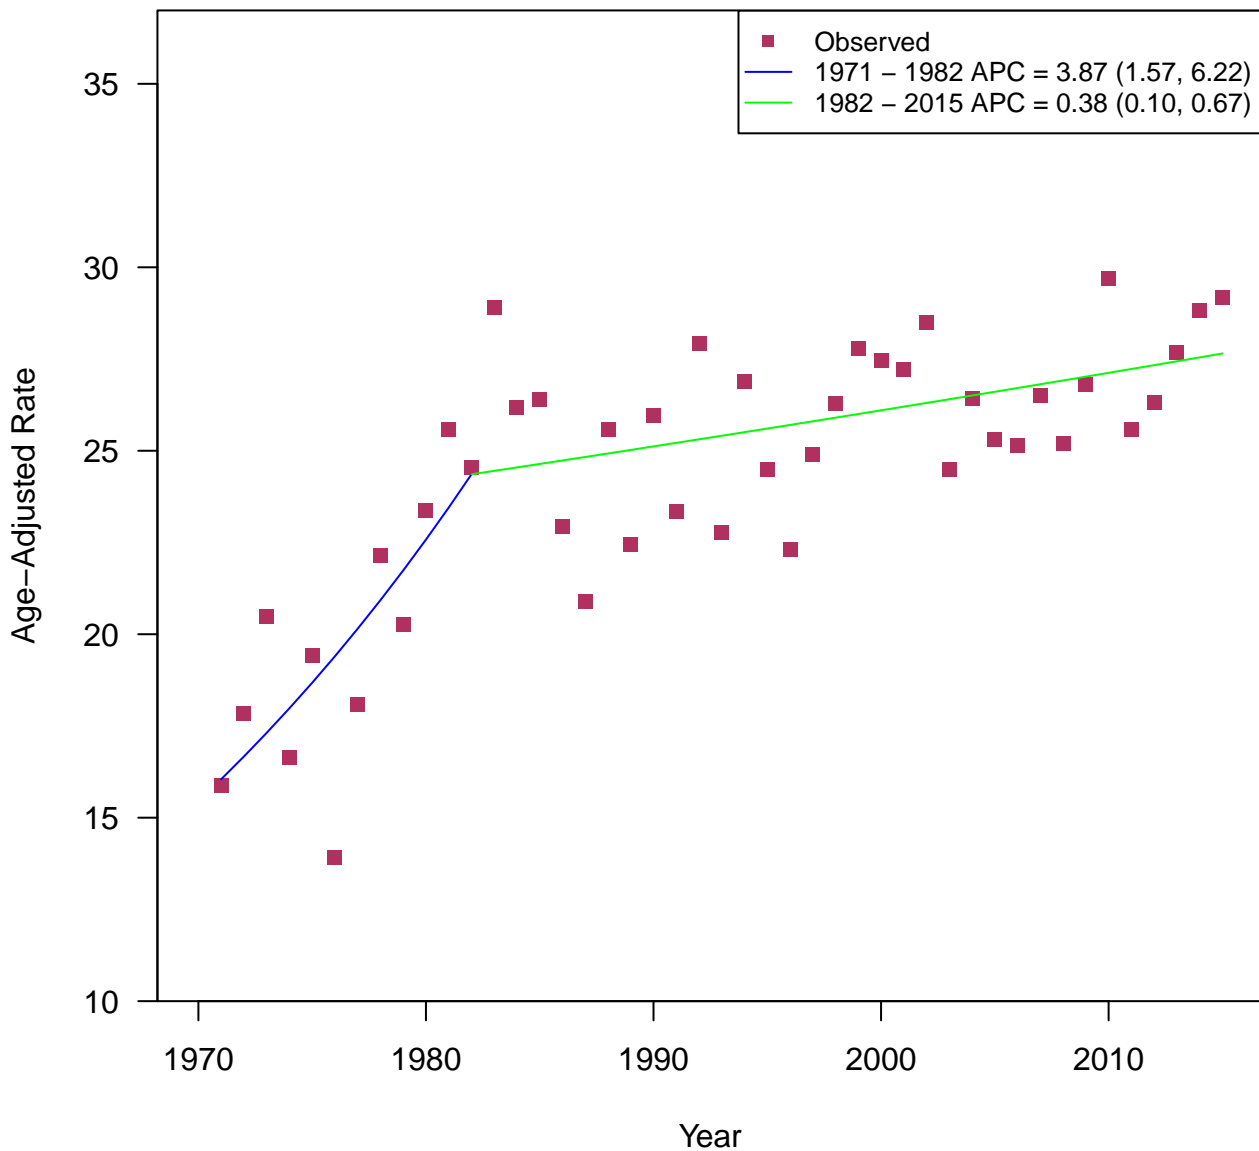

**Figure 261. Age-adjusted incidence rates of multiple myeloma in females aged 80–89 years in Canada, 1971–2015**

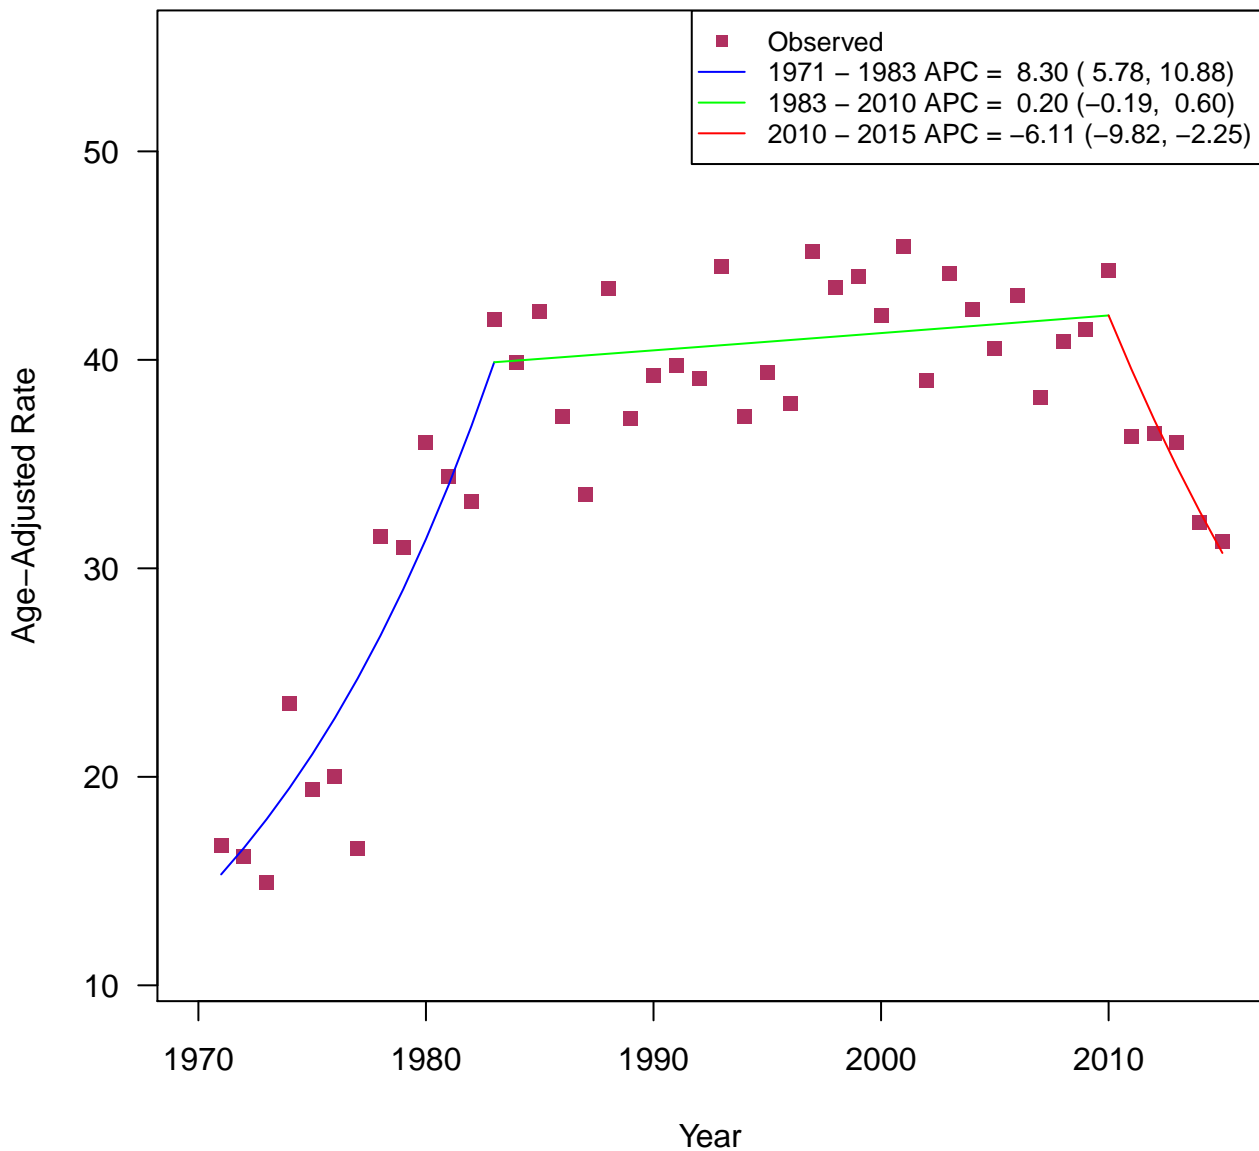

**Figure 262. Age-adjusted incidence rates of non-Hodgkin's lymphoma in males aged 20-29 years in Canada, 1971-2015**

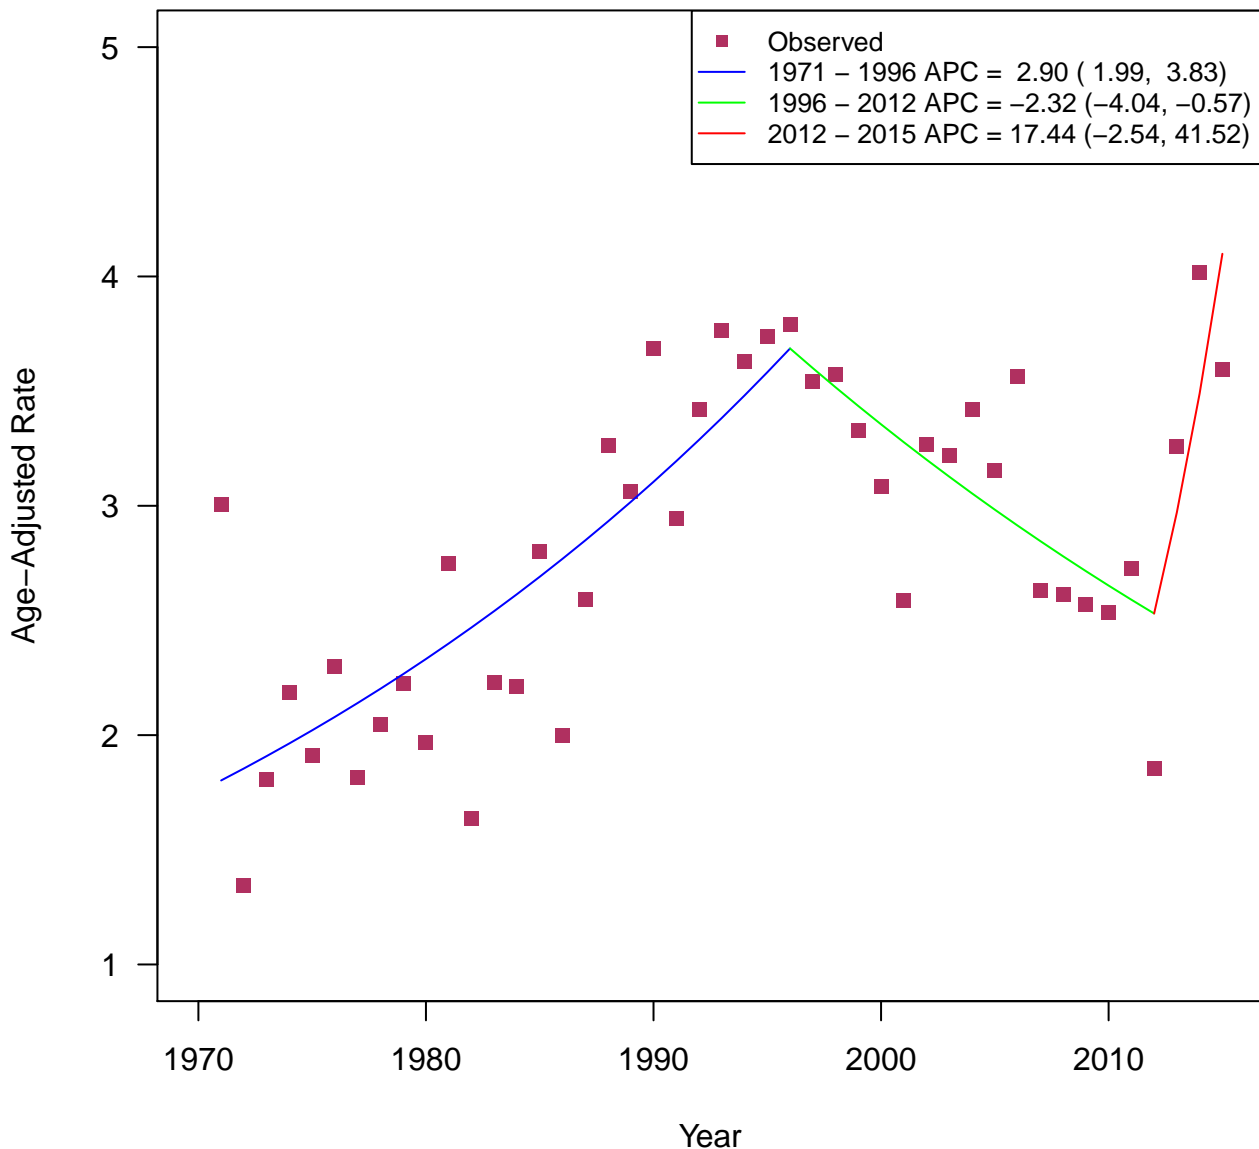

**Figure 263. Age-adjusted incidence rates of non-Hodgkin's lymphoma in males aged 20-39 years in Canada, 1971-2015**

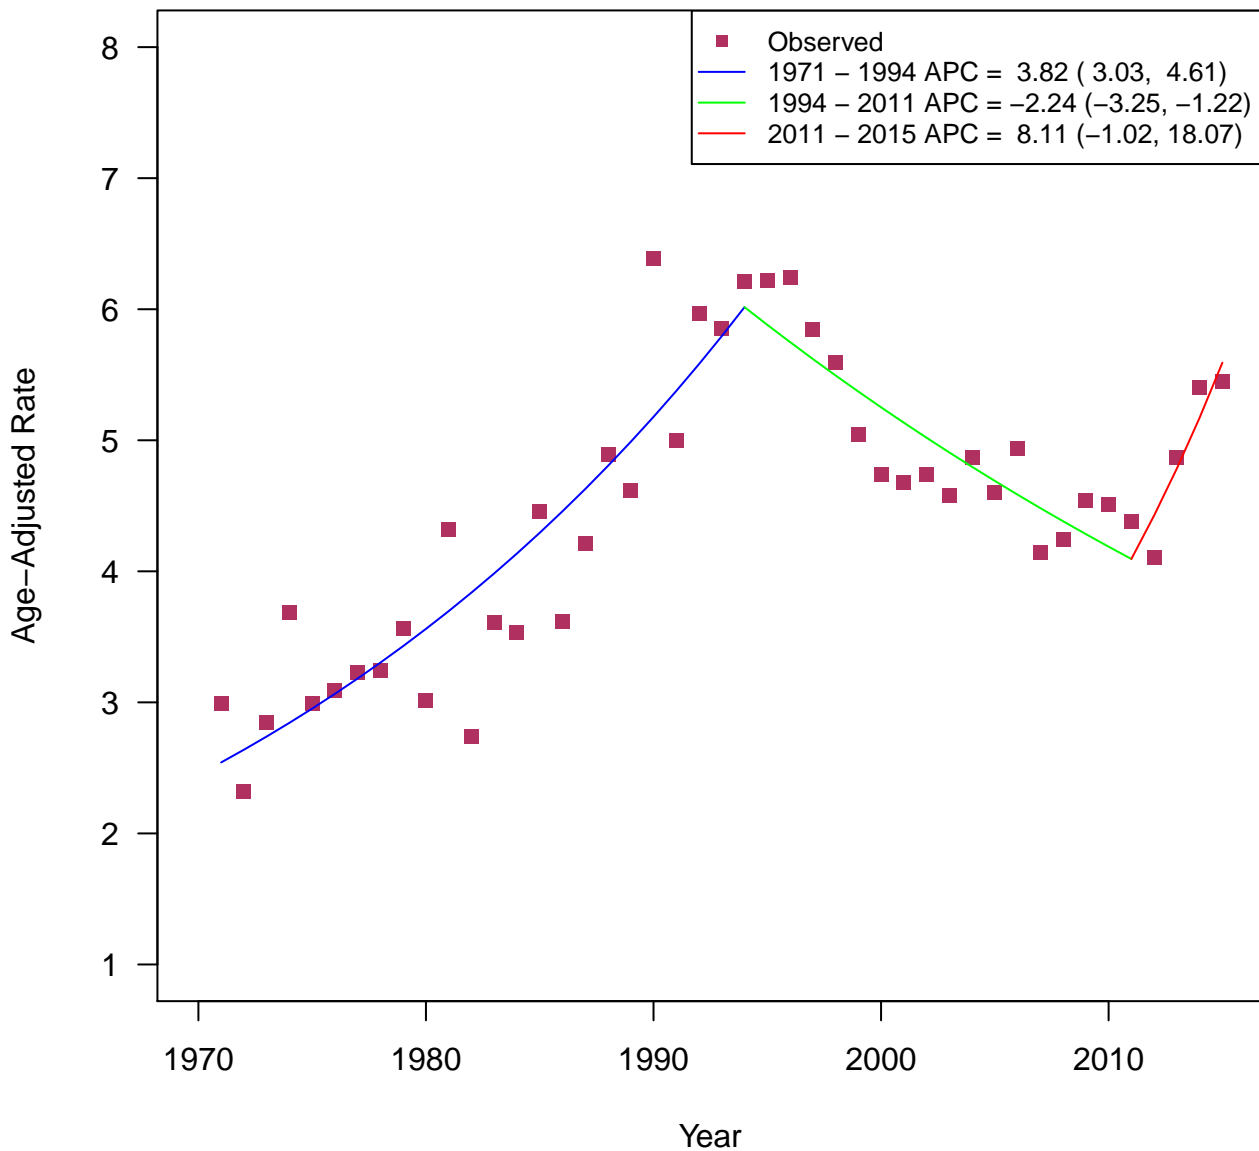

**Figure 264. Age-adjusted incidence rates of non-Hodgkin's lymphoma in males aged 20-49 years in Canada, 1971-2015**

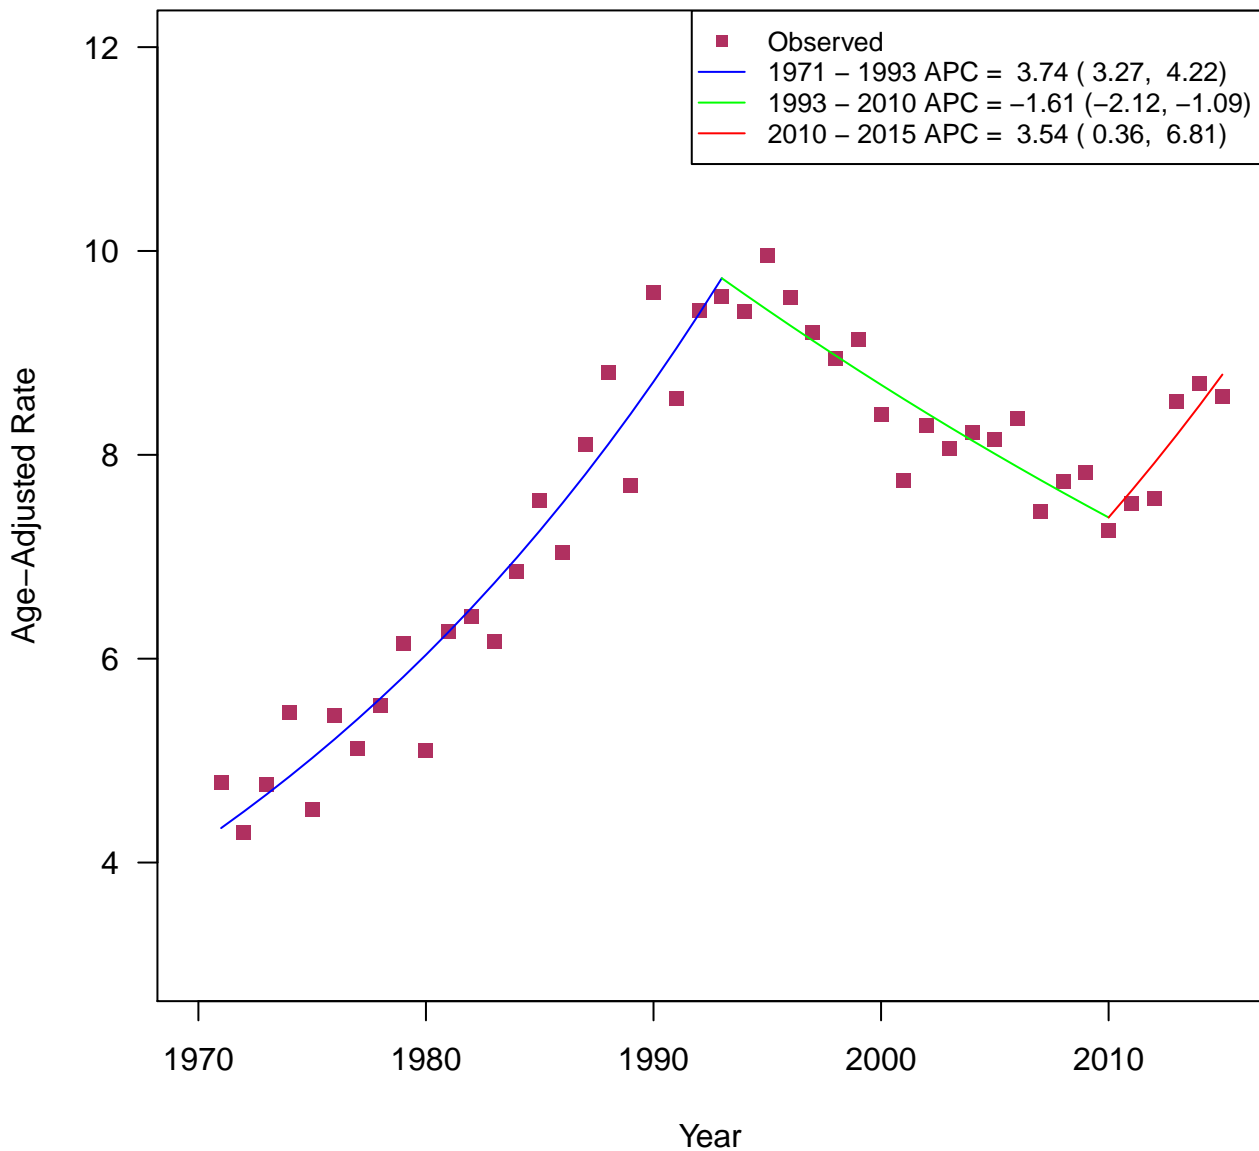

**Figure 265. Age-adjusted incidence rates of non-Hodgkin's lymphoma in males aged 30-39 years in Canada, 1971-2015**

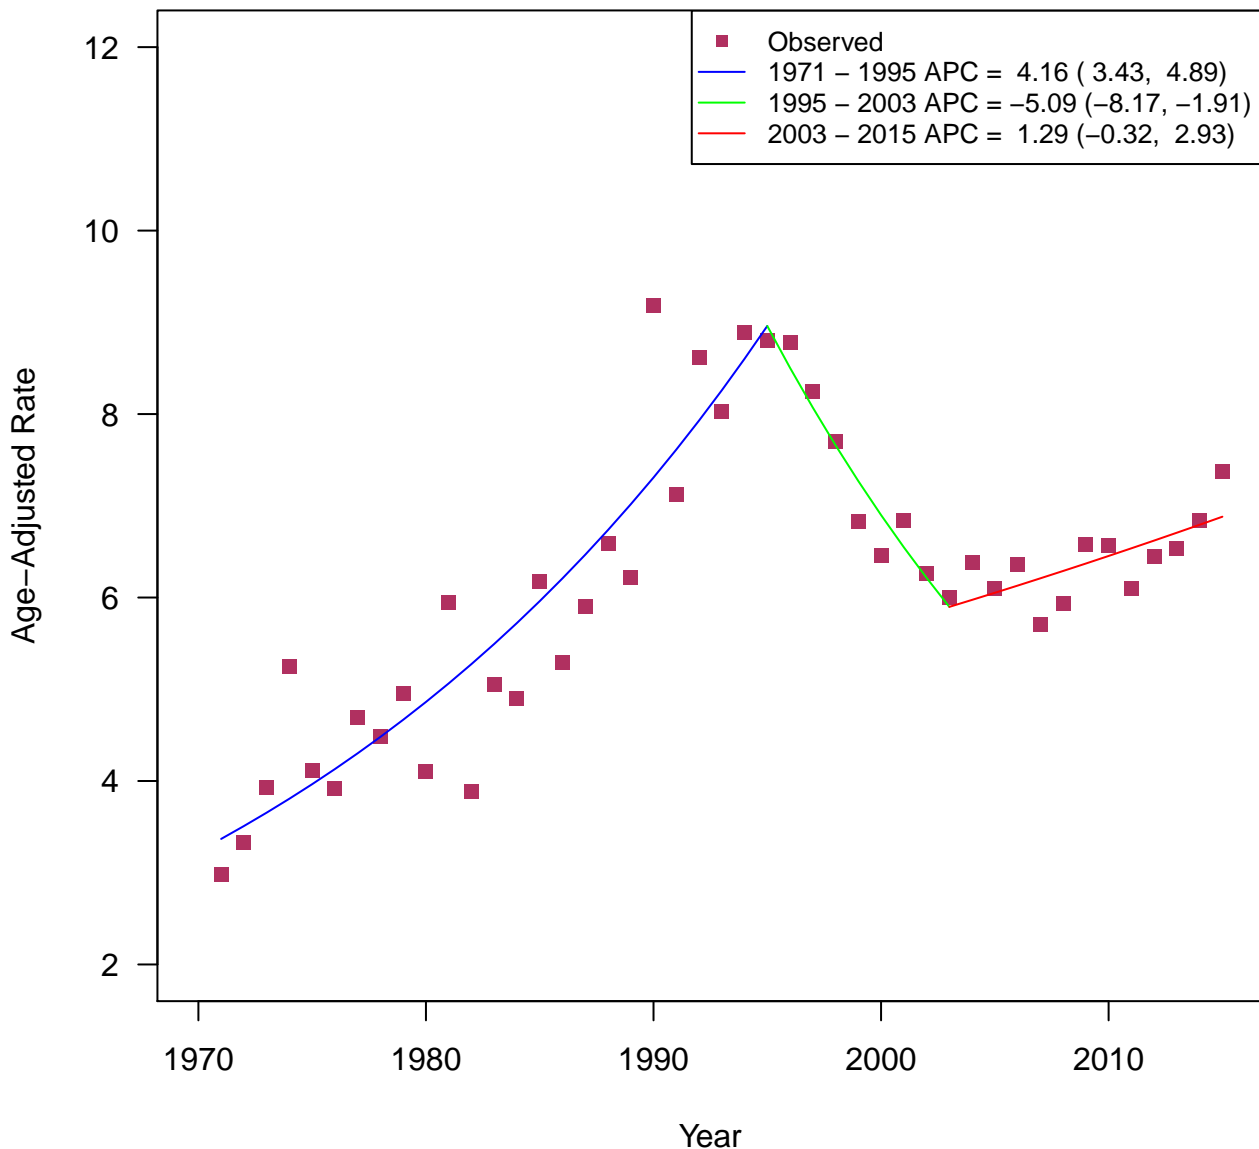

**Figure 266. Age-adjusted incidence rates of non-Hodgkin's lymphoma in males aged 40-49 years in Canada, 1971-2015**

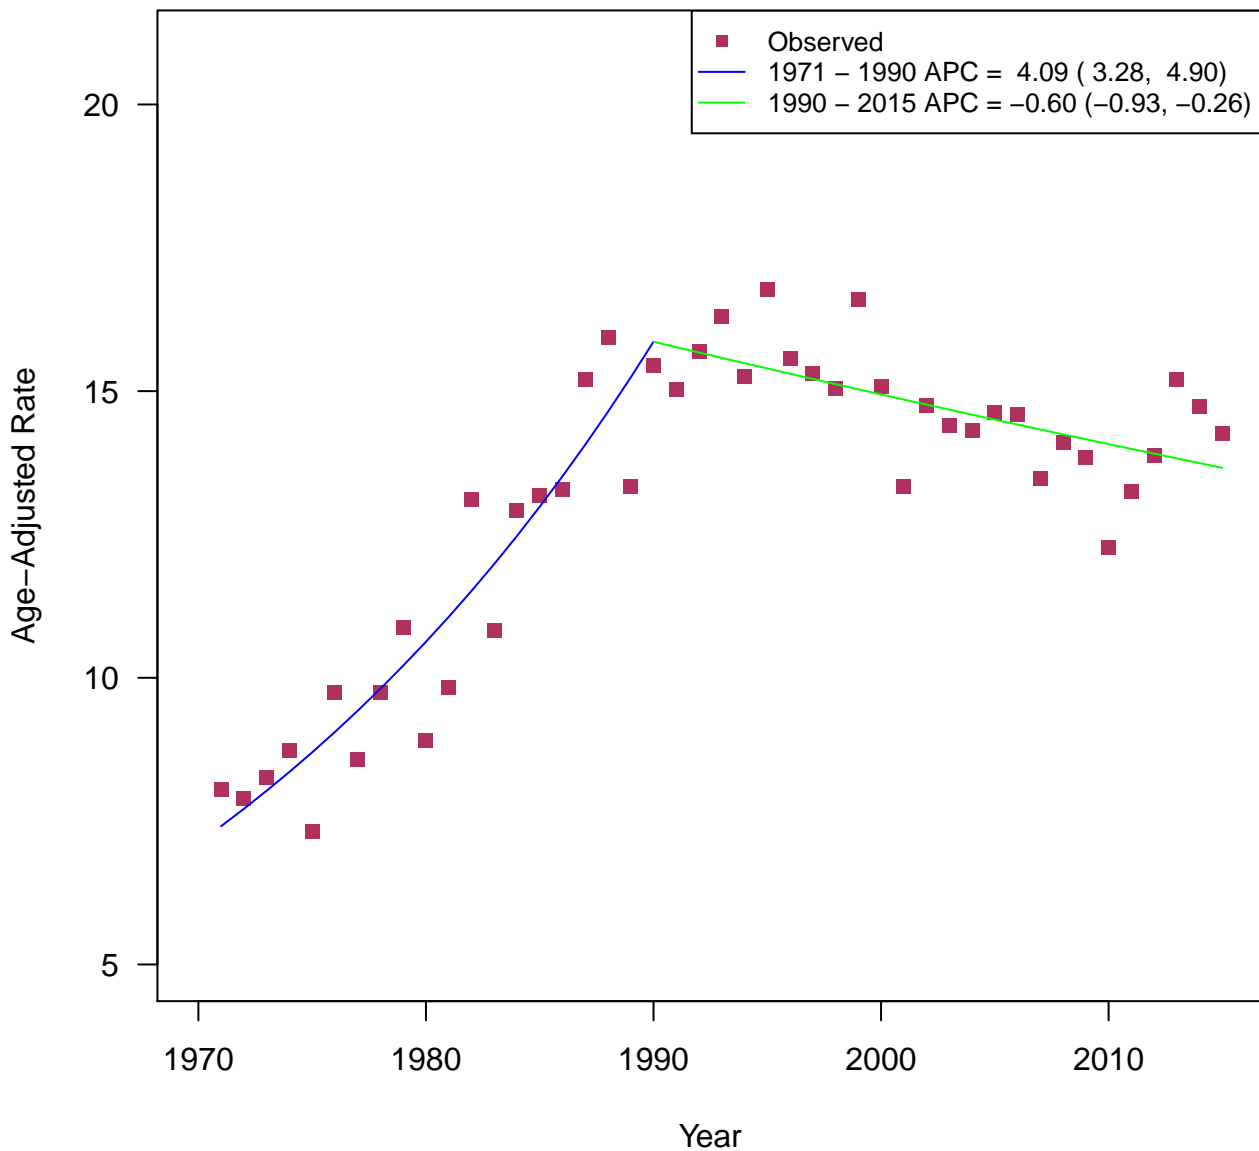

**Figure 267. Age-adjusted incidence rates of non-Hodgkin's lymphoma in males aged 50–59 years in Canada, 1971–2015**

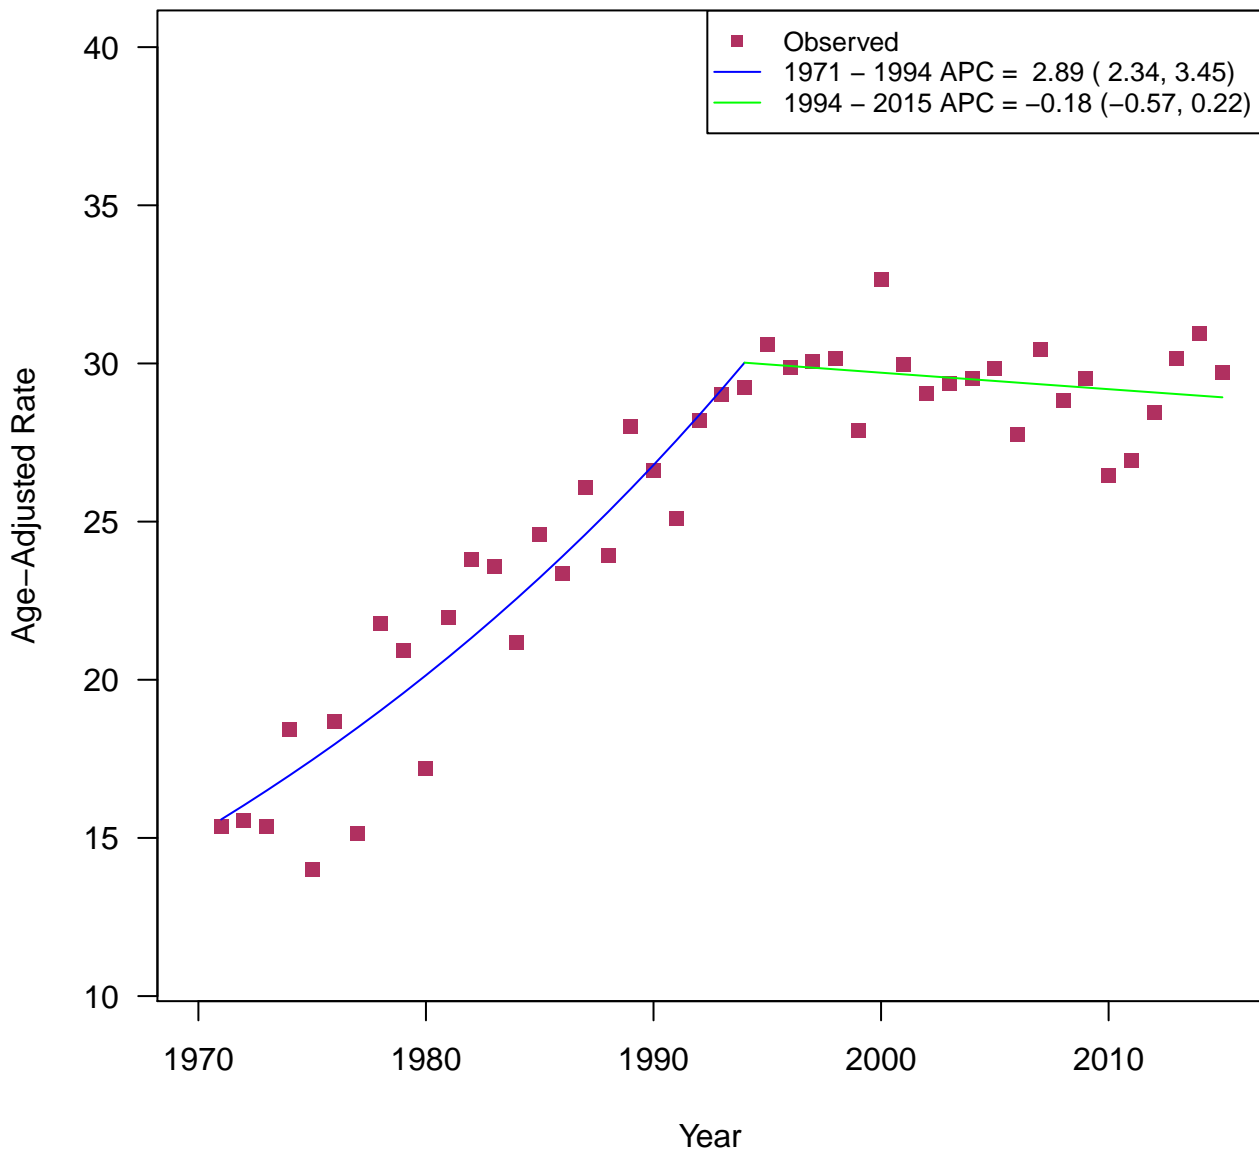



**Figure 268. Age-adjusted incidence rates of non-Hodgkin's lymphoma in males aged 60–69 years in Canada, 1971–2015**

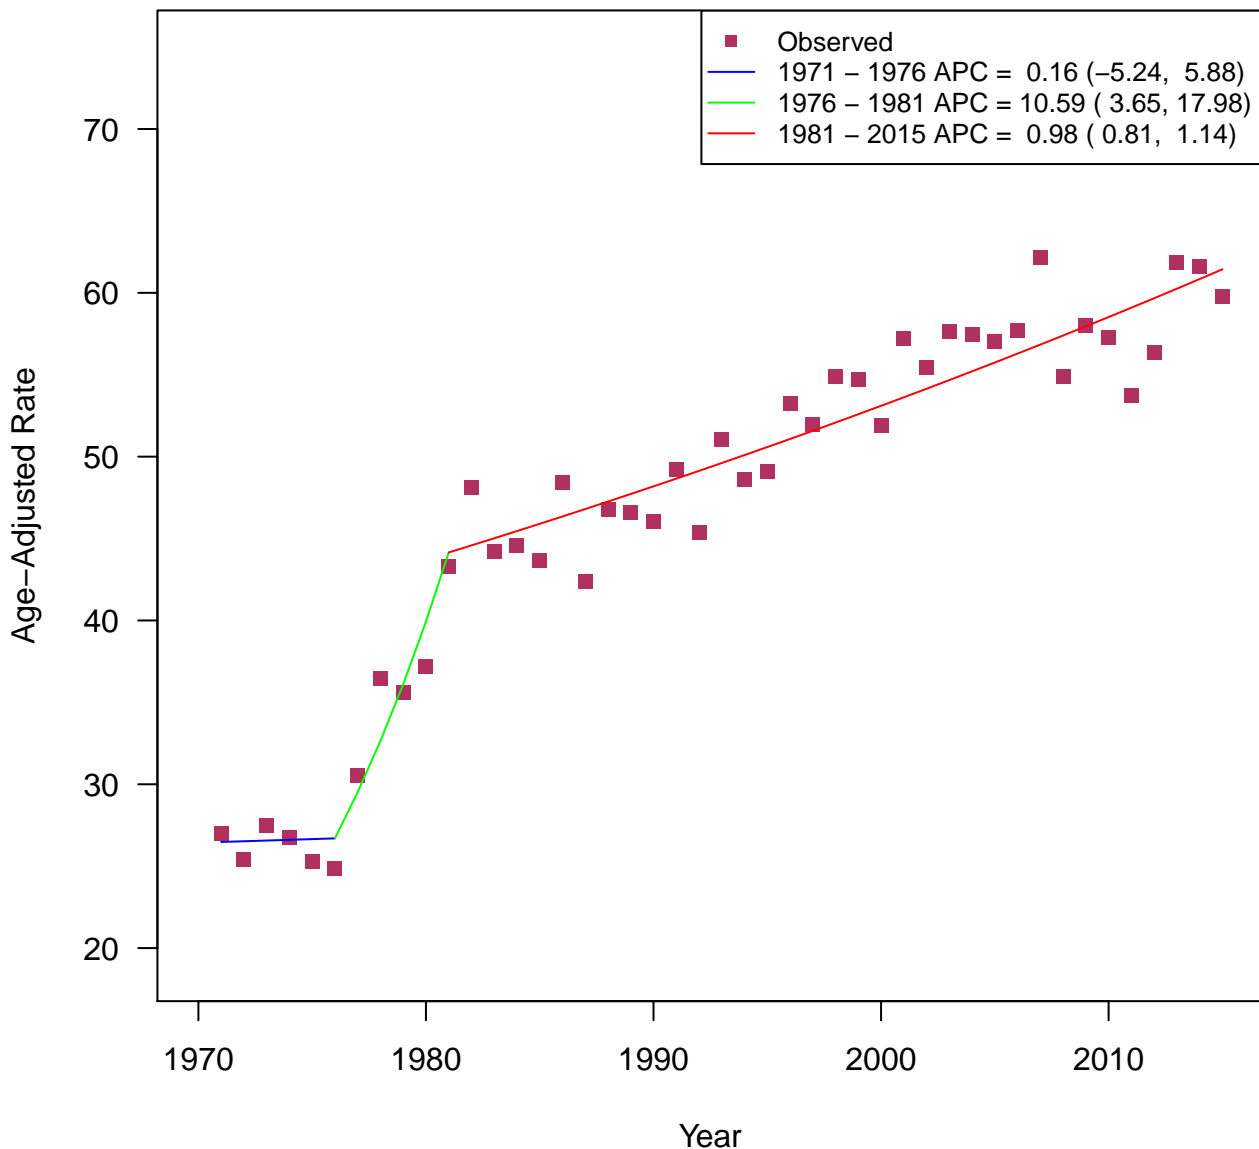

**Figure 269. Age-adjusted incidence rates of non-Hodgkin's lymphoma in males aged 70-79 years in Canada, 1971-2015**

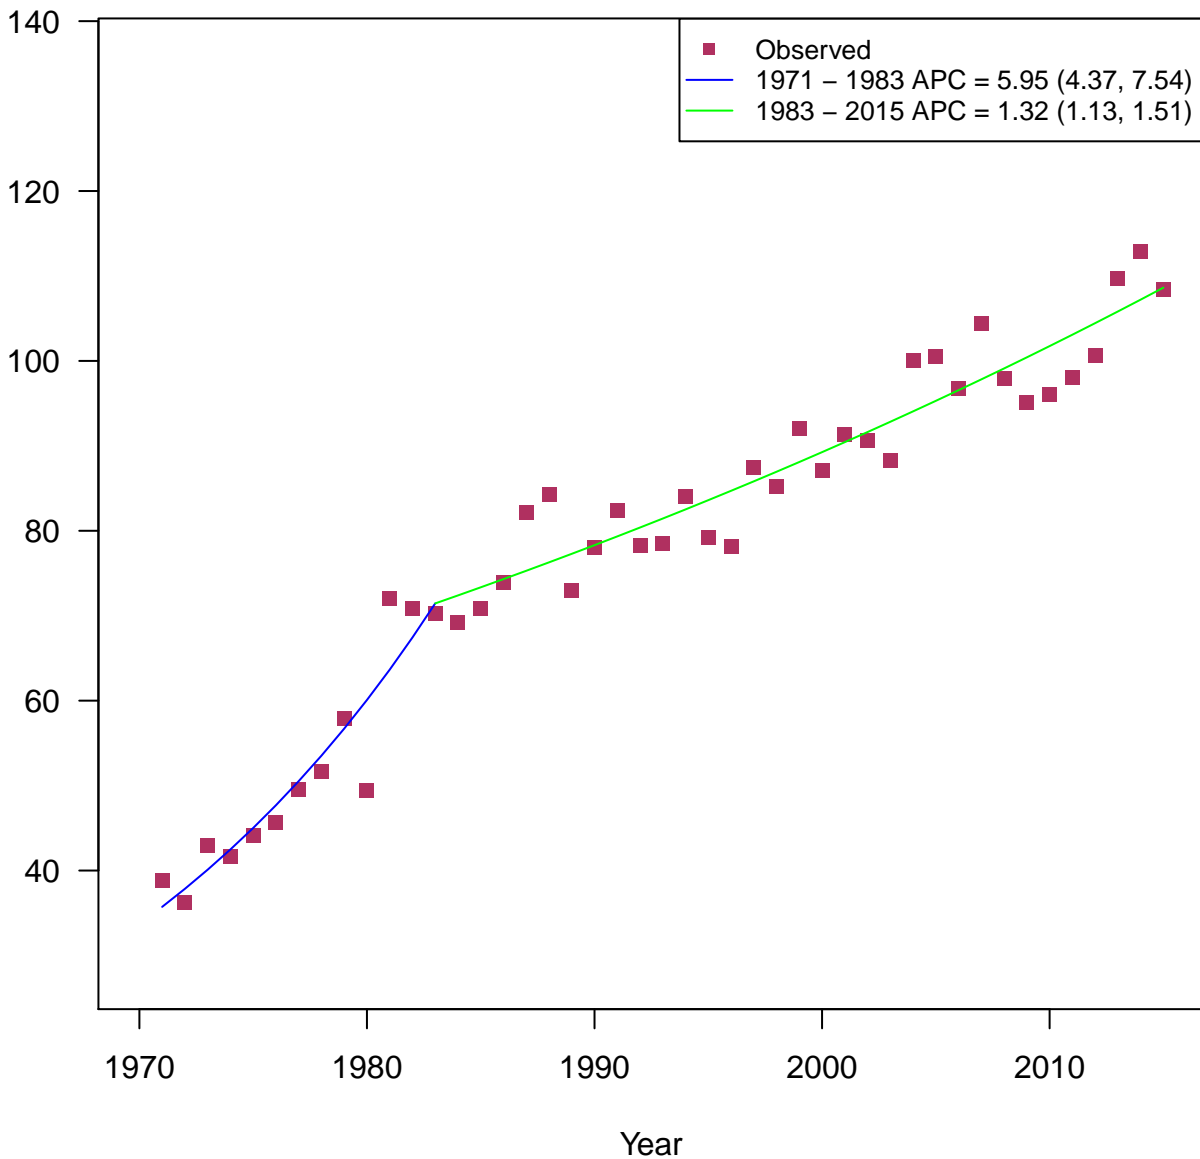

**Figure 270. Age-adjusted incidence rates of non-Hodgkin's lymphoma in males aged 80-89 years in Canada, 1971-2015**

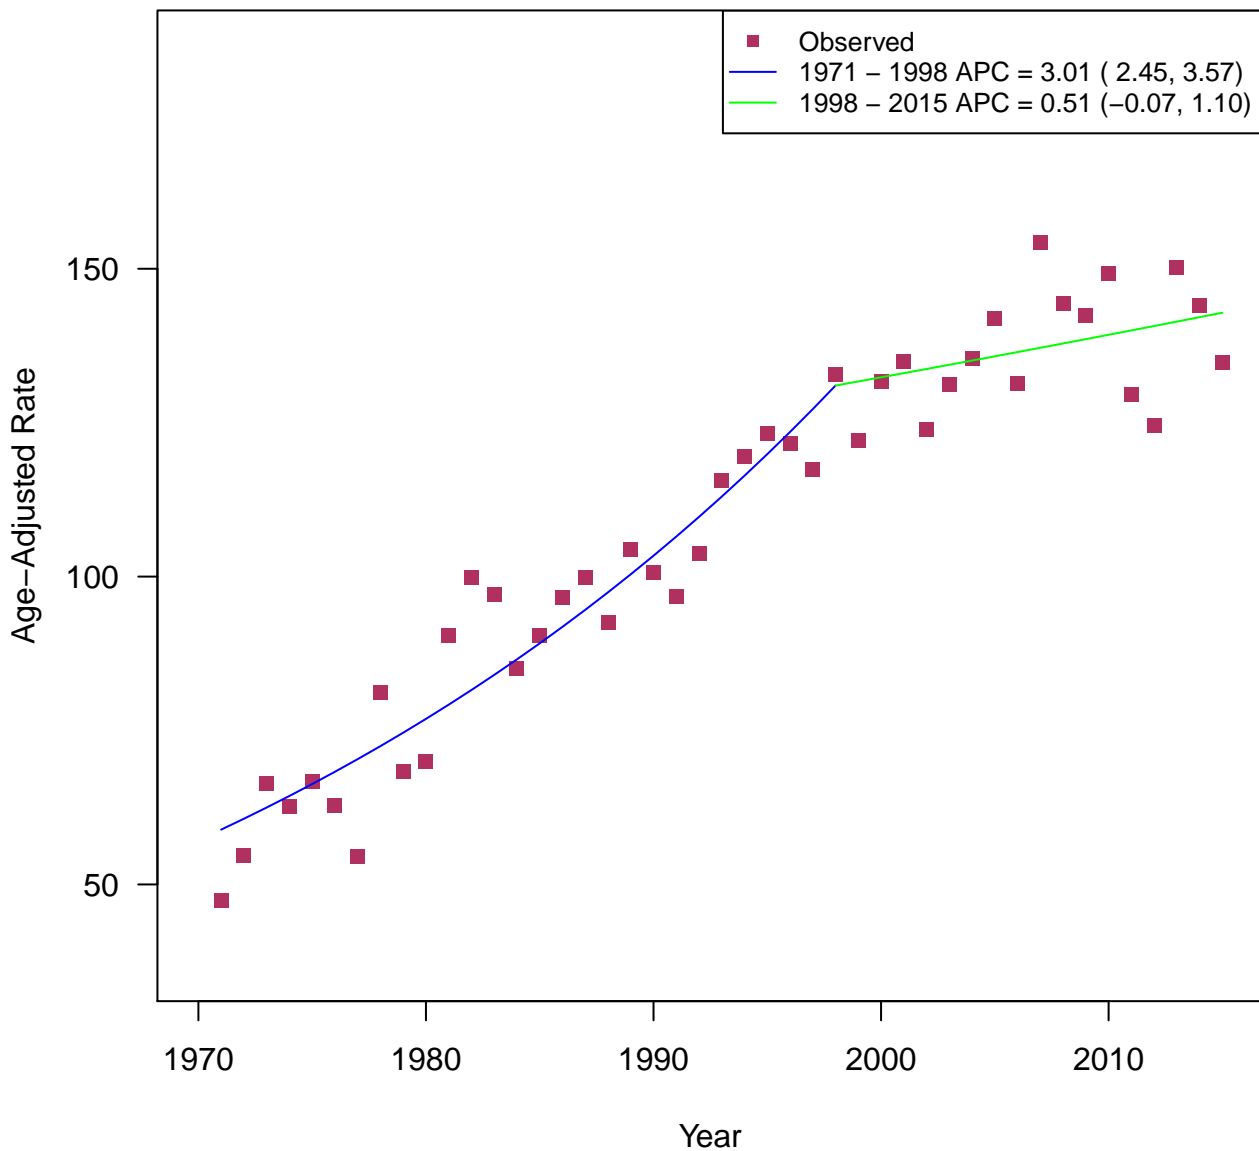

**Figure 271. Age-adjusted incidence rates of non-Hodgkin's lymphoma in females aged 20-29 years in Canada, 1971-2015**

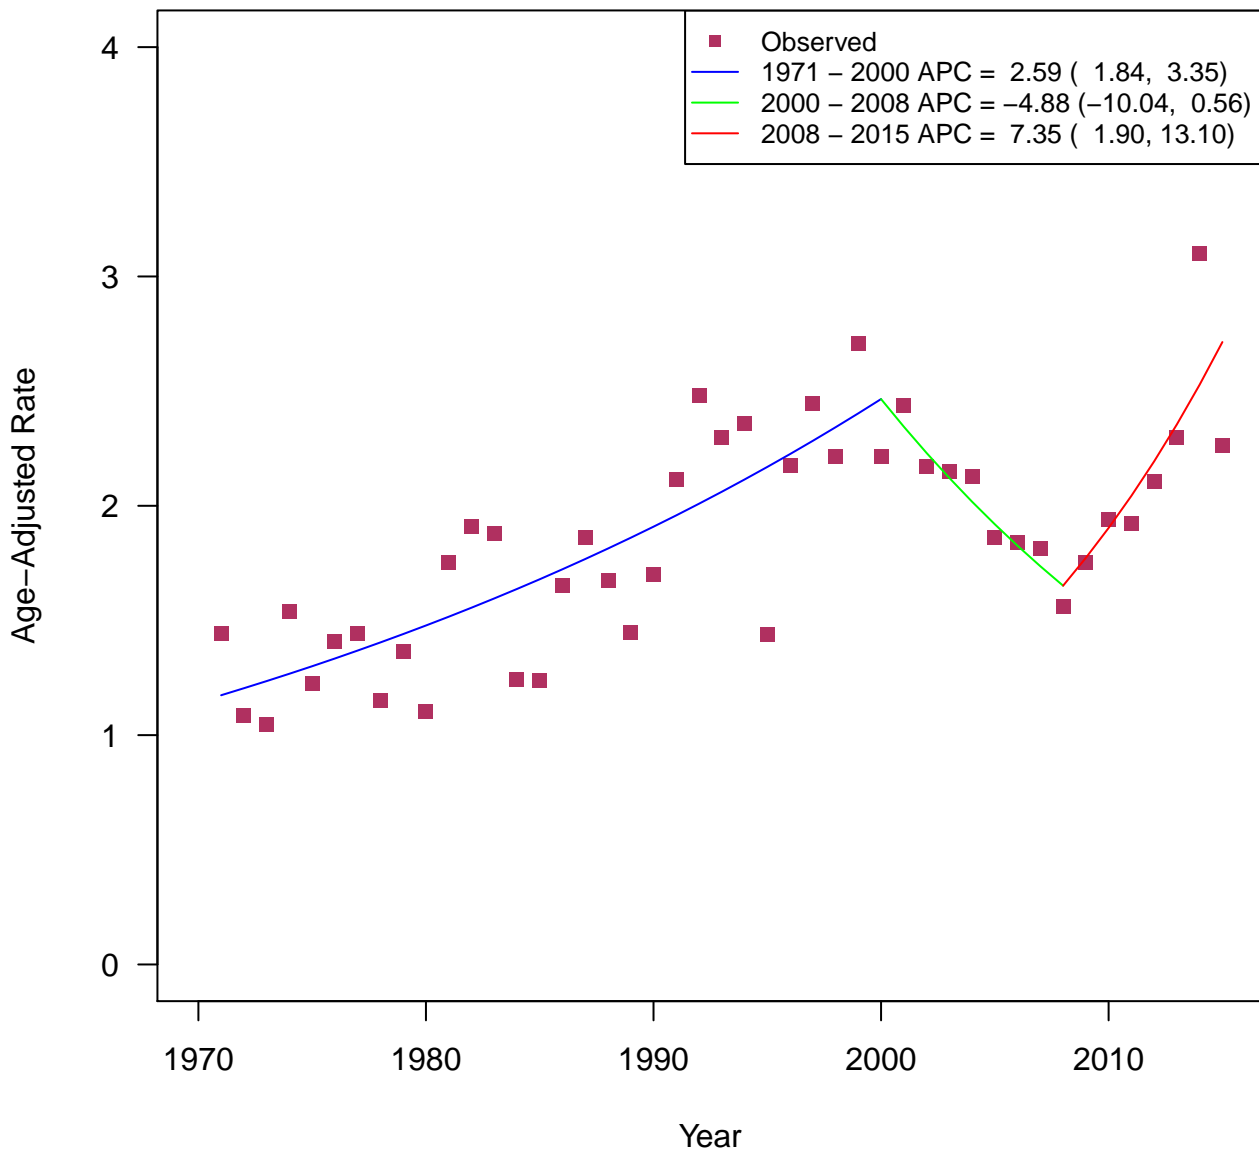

**Figure 272. Age-adjusted incidence rates of non-Hodgkin's lymphoma in females aged 20-39 years in Canada, 1971-2015**

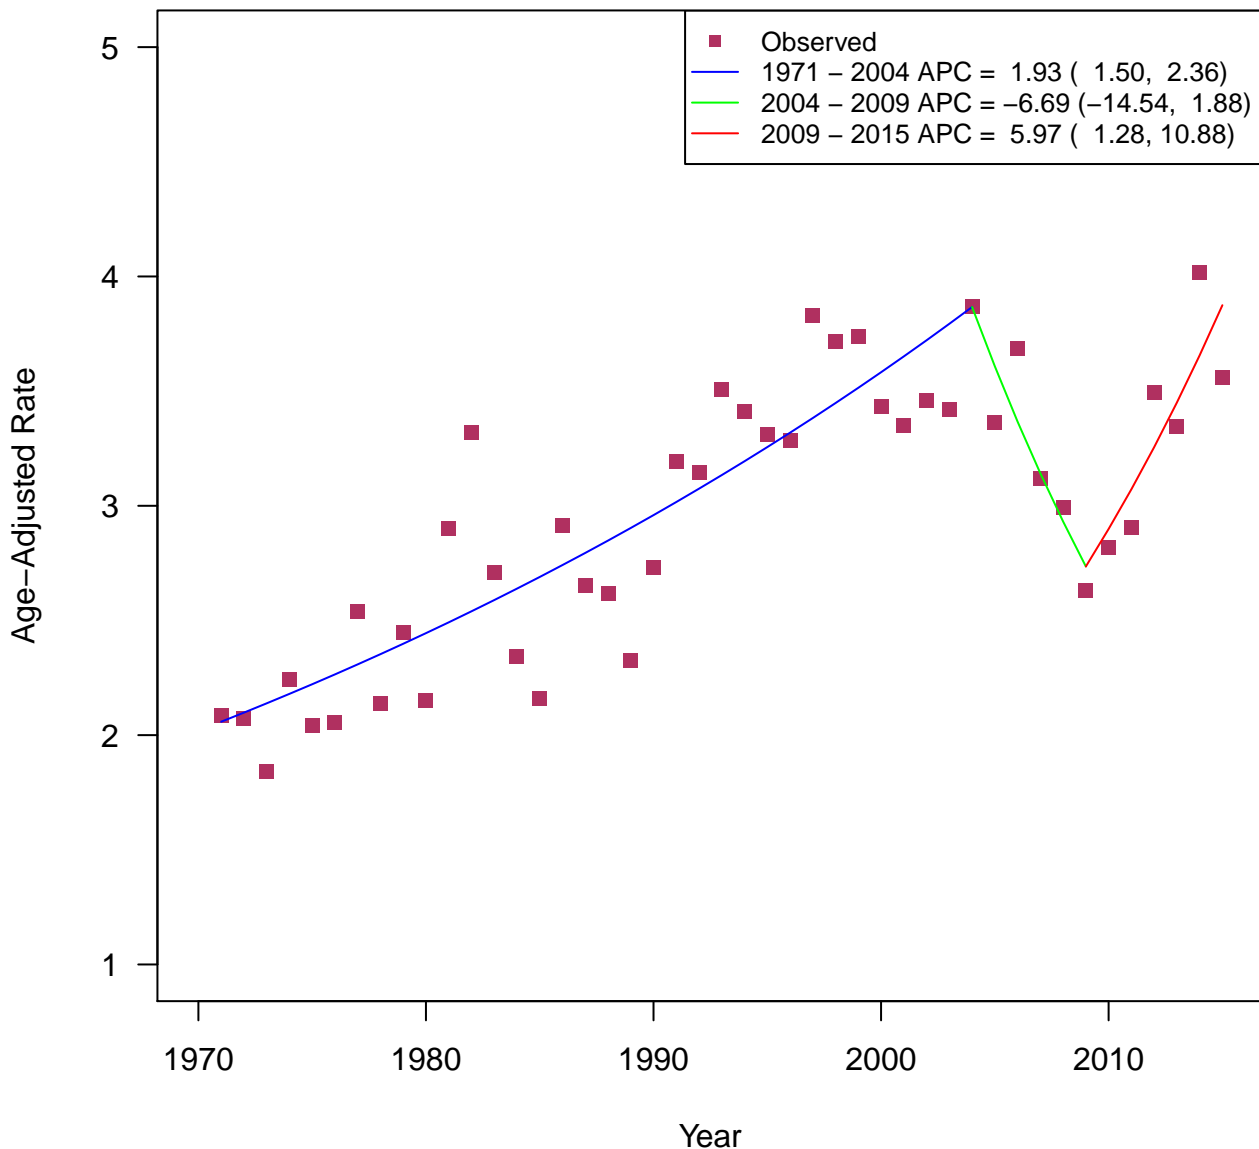

**Figure 273. Age-adjusted incidence rates of non-Hodgkin's lymphoma in females aged 30-39 years in Canada, 1971-2015**

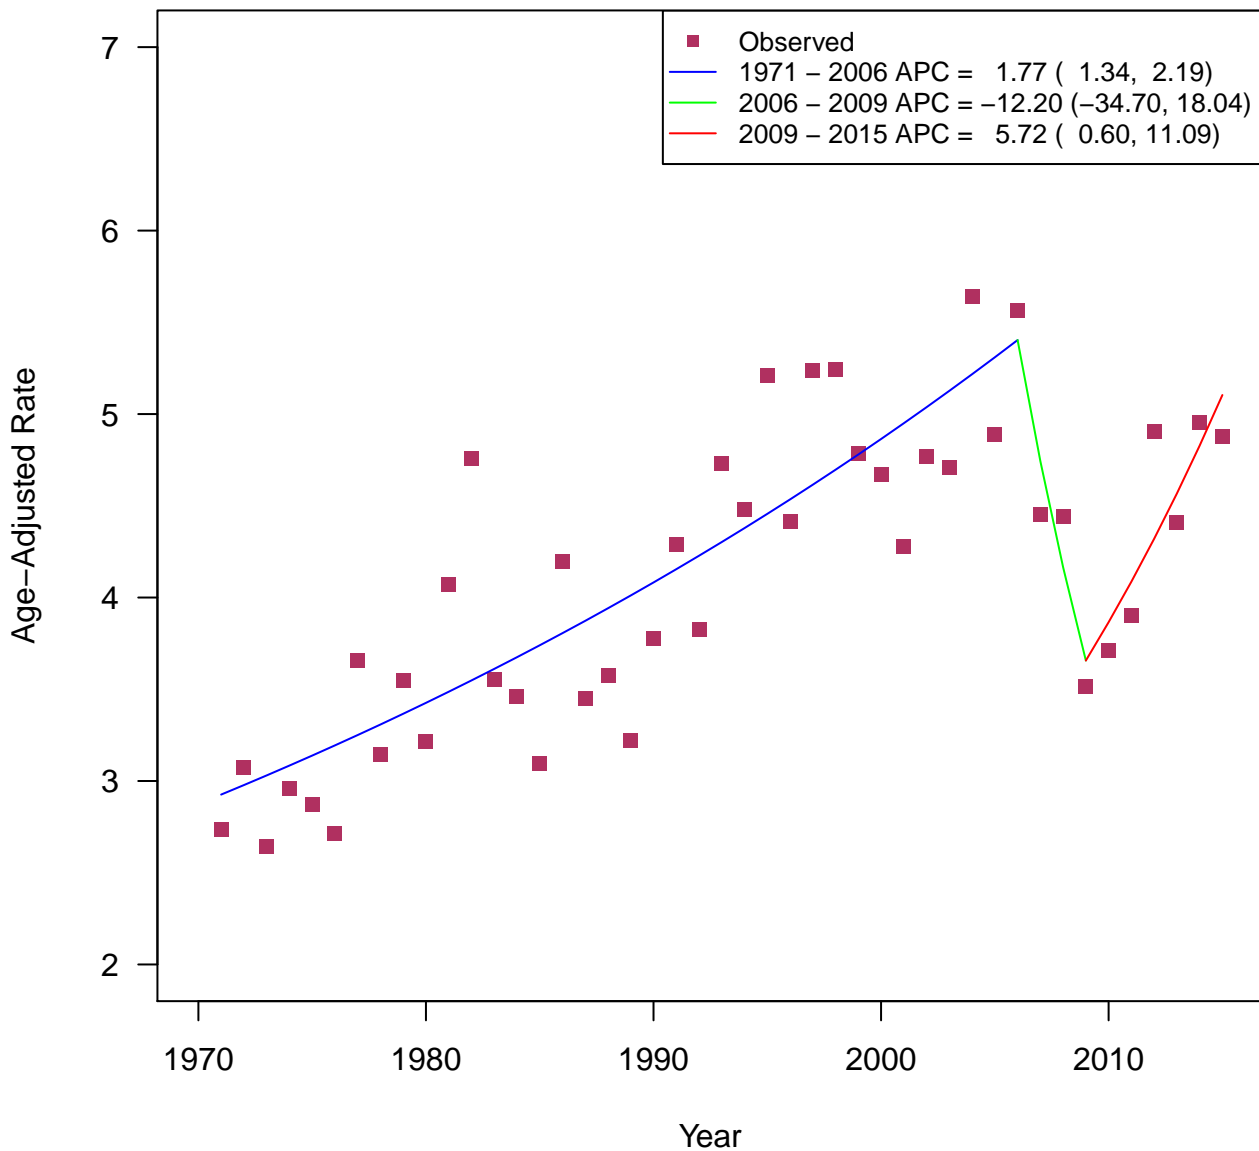

**Figure 274. Age-adjusted incidence rates of non-Hodgkin's lymphoma in females aged 40-49 years in Canada, 1971-2015**

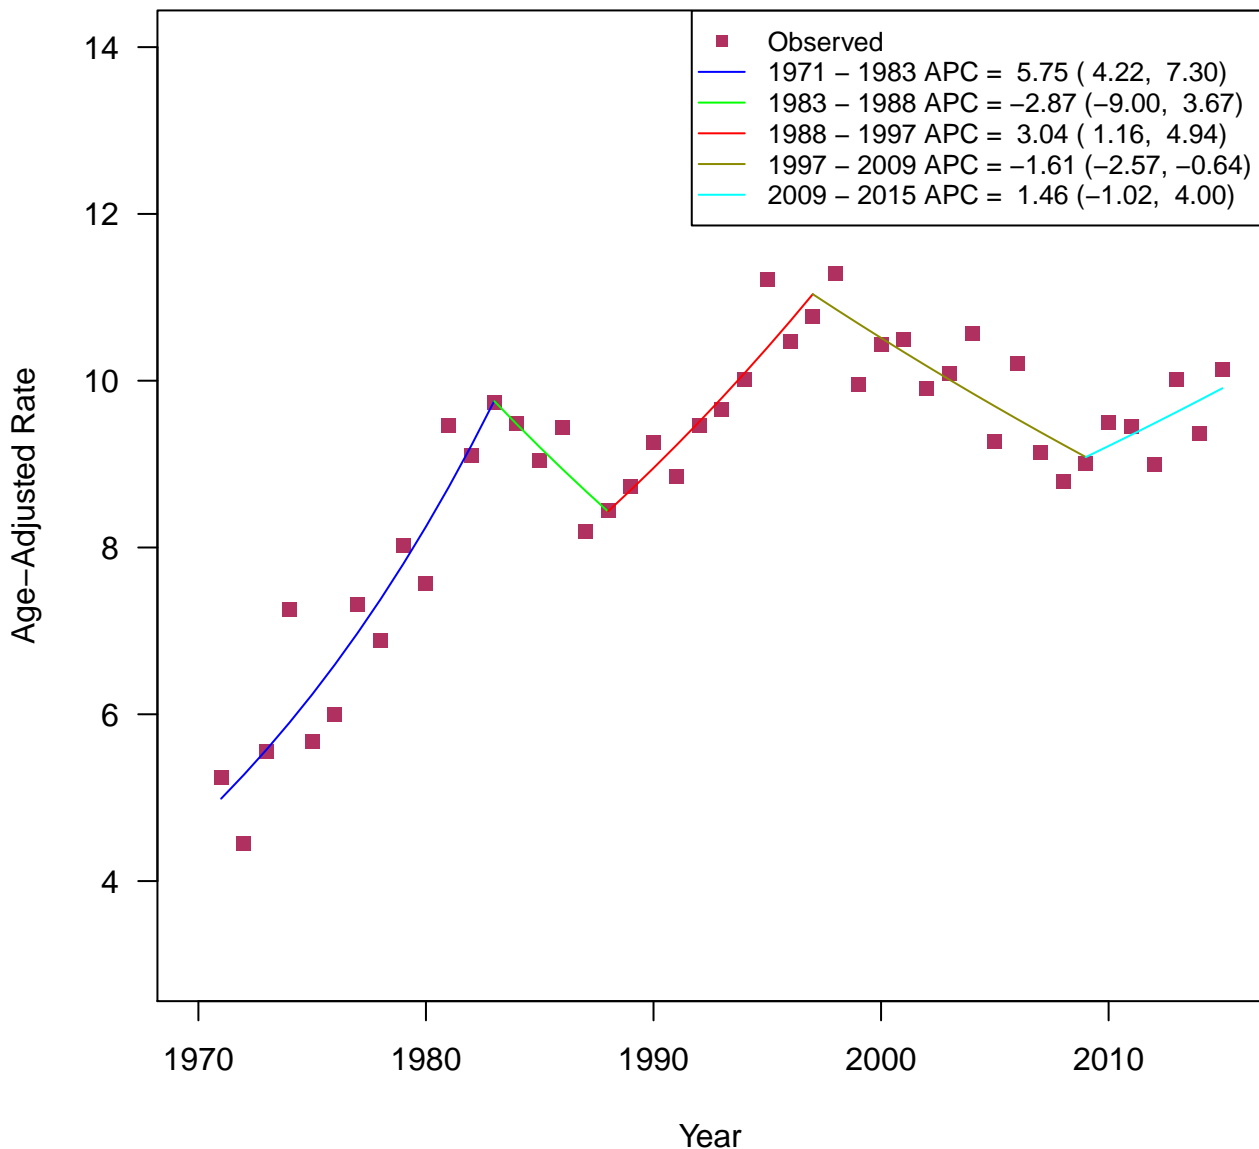

**Figure 275. Age-adjusted incidence rates of non-Hodgkin's lymphoma in females aged 50-59 years in Canada, 1971-2015**

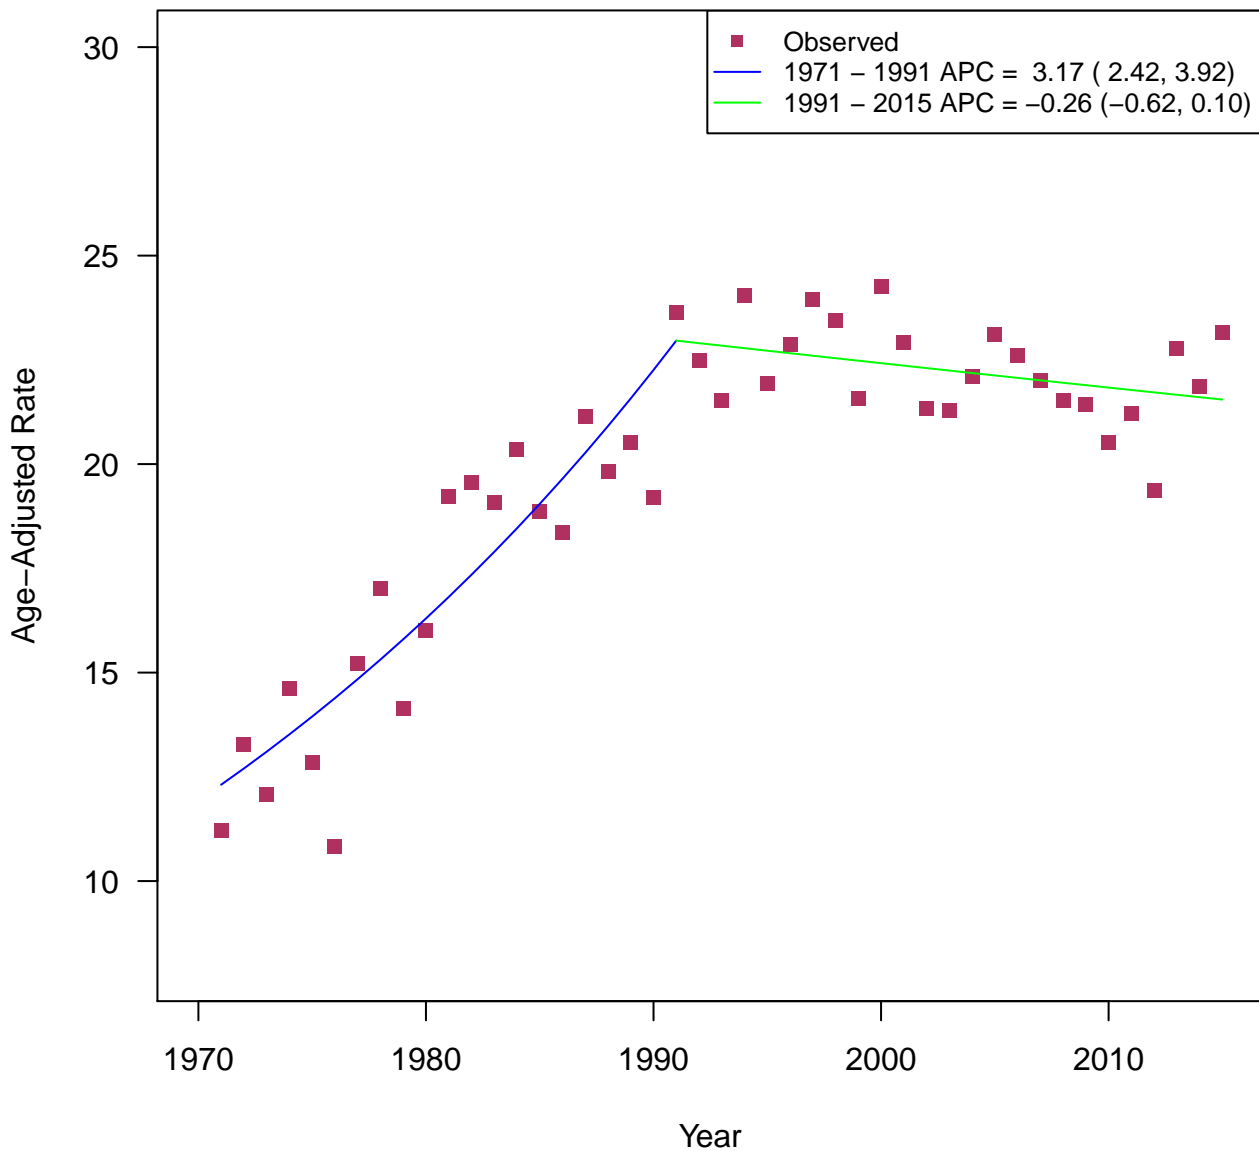



**Figure 276. Age-adjusted incidence rates of non-Hodgkin's lymphoma in females aged 60-69 years in Canada, 1971-2015**

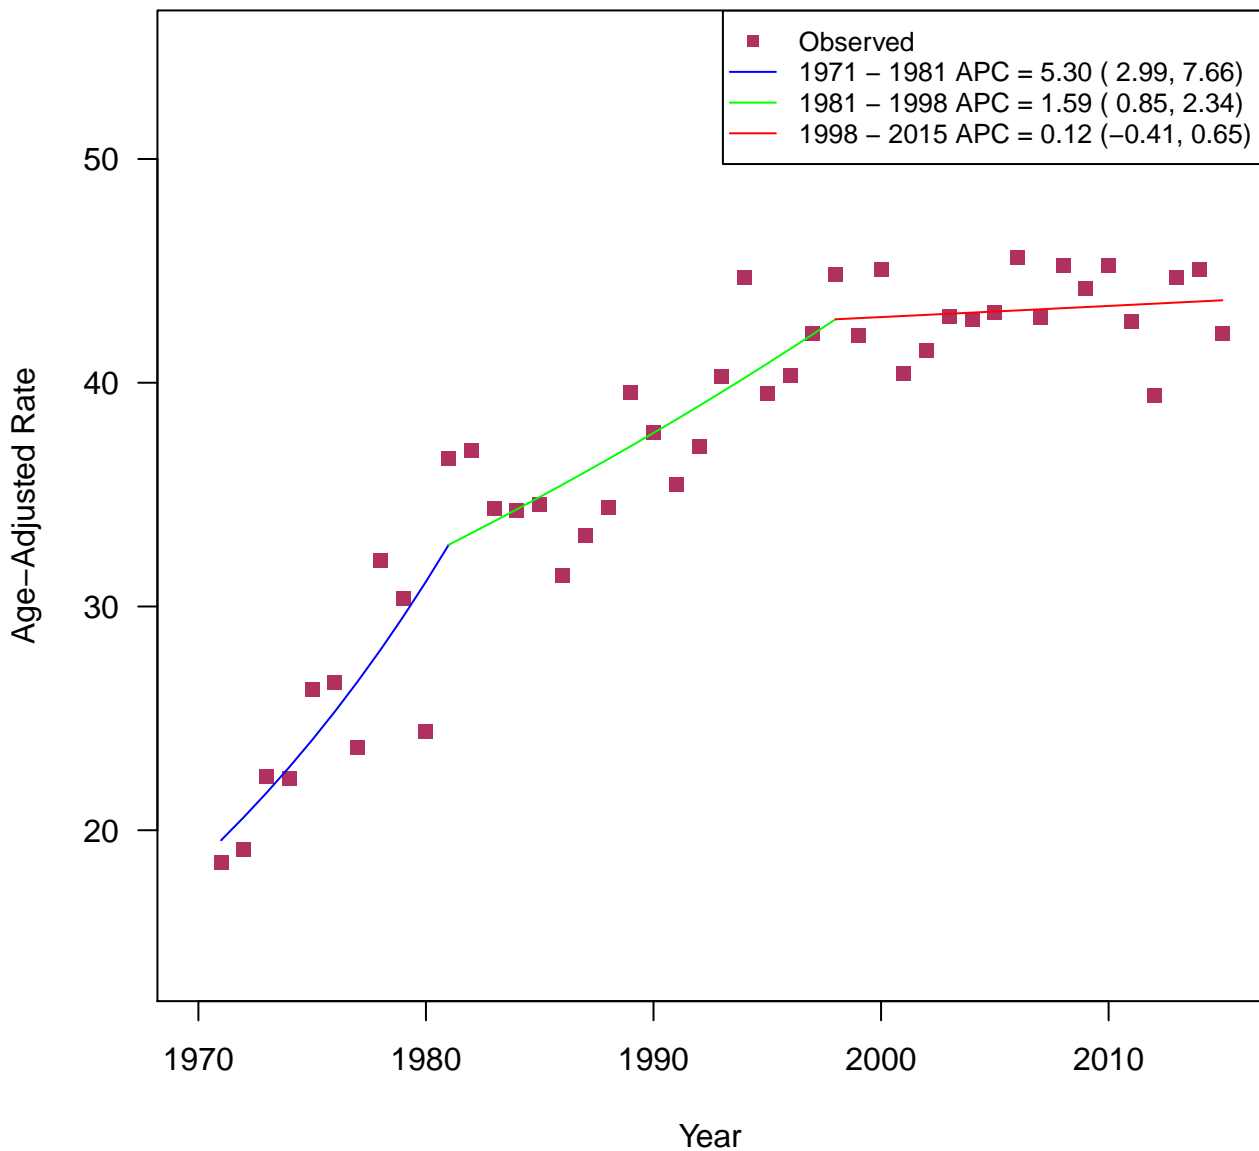

**Figure 277. Age-adjusted incidence rates of non-Hodgkin's lymphoma in females aged 70-79 years in Canada, 1971-2015**

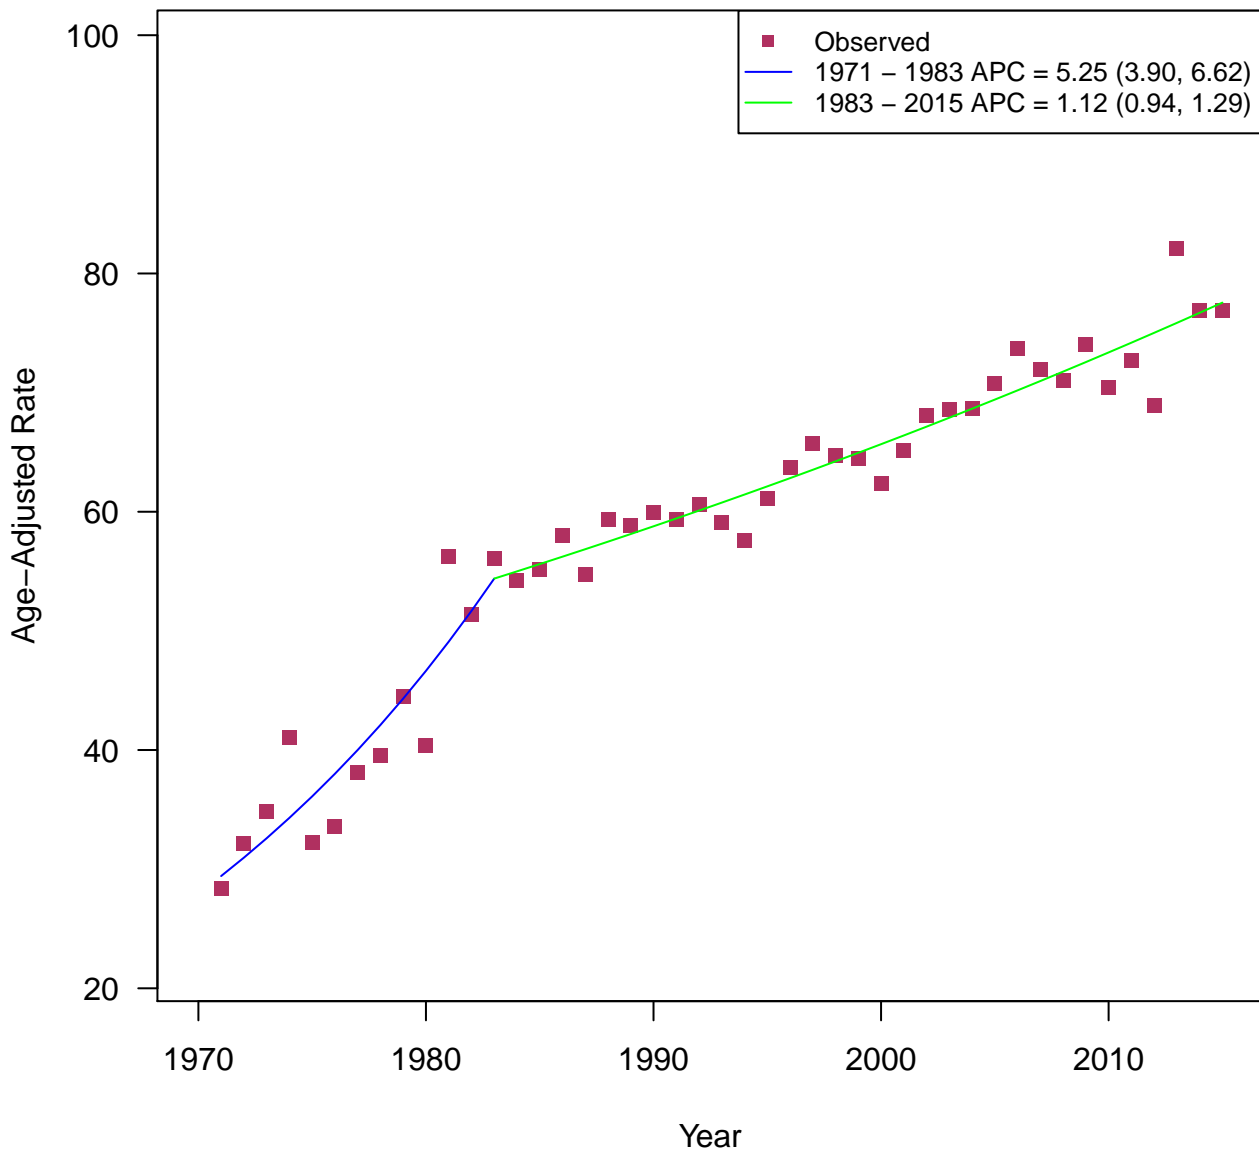

**Figure 278. Age-adjusted incidence rates of non-Hodgkin's lymphoma in females aged 80-89 years in Canada, 1971-2015**

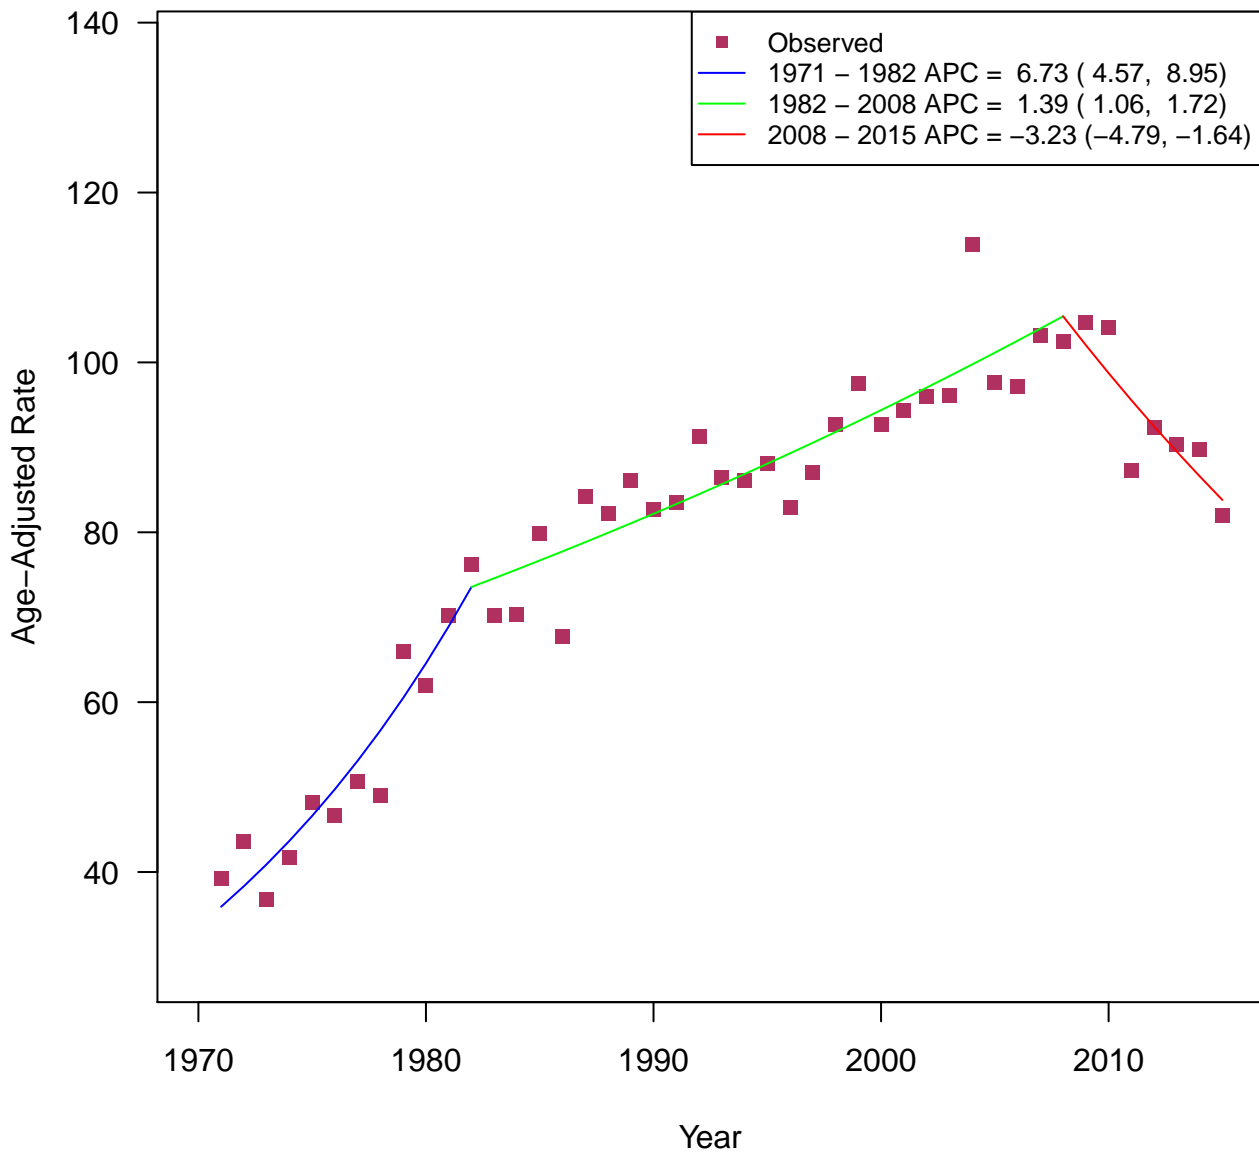

**Figure 279. Age-adjusted incidence rates of oral cancer in males aged 20–29 years in Canada, 1971–2015**

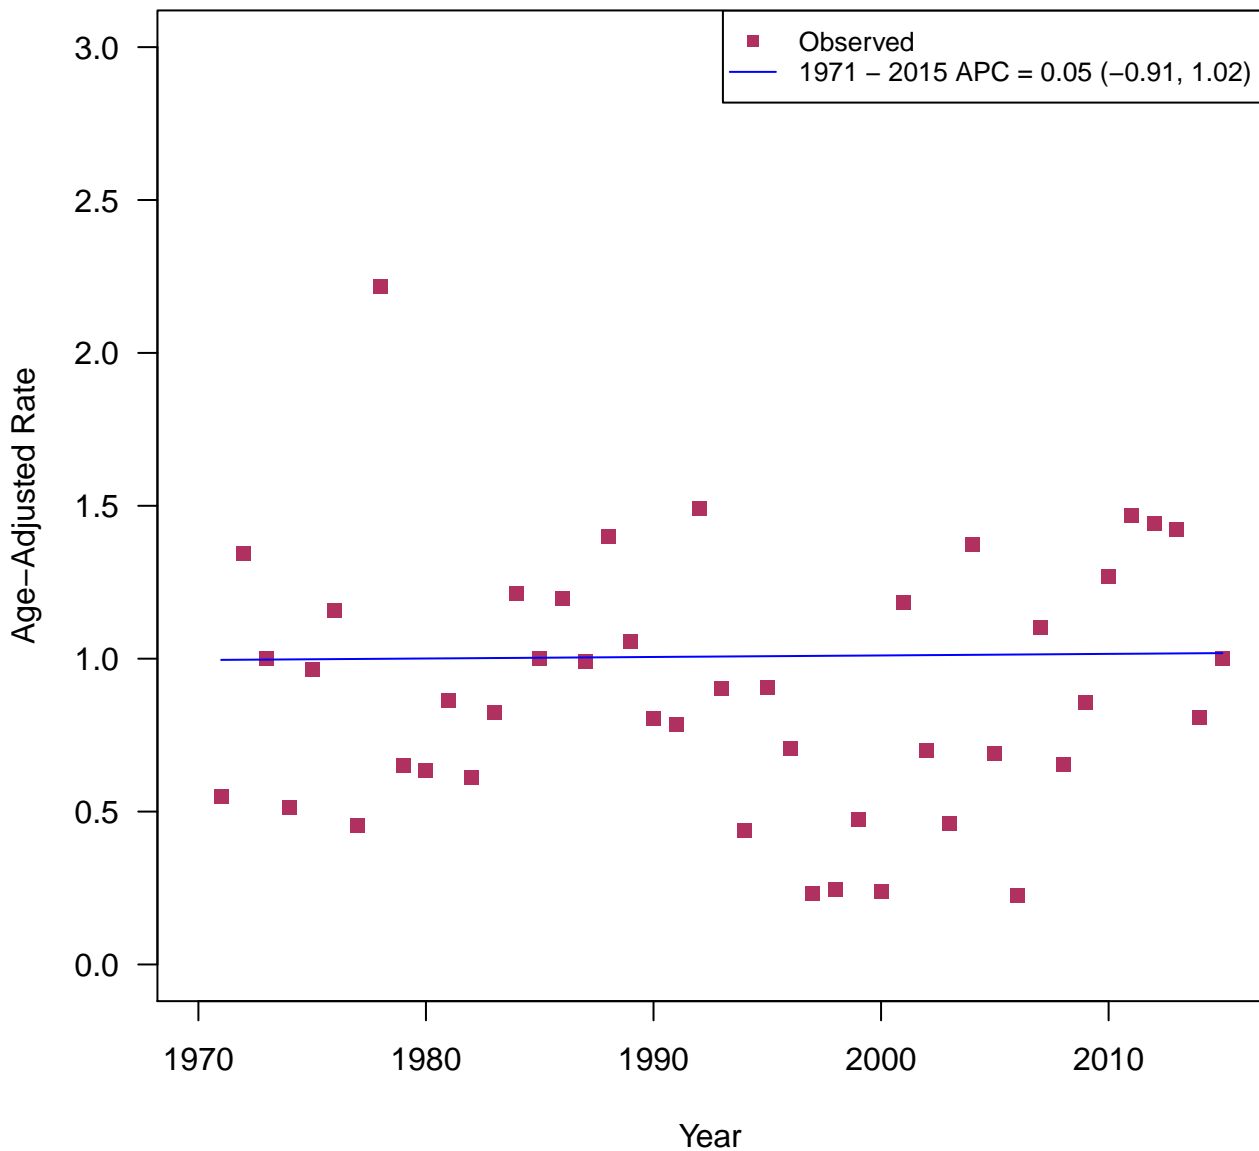

**Figure 280. Age-adjusted incidence rates of oral cancer in males aged 20–39 years in Canada, 1971–2015**

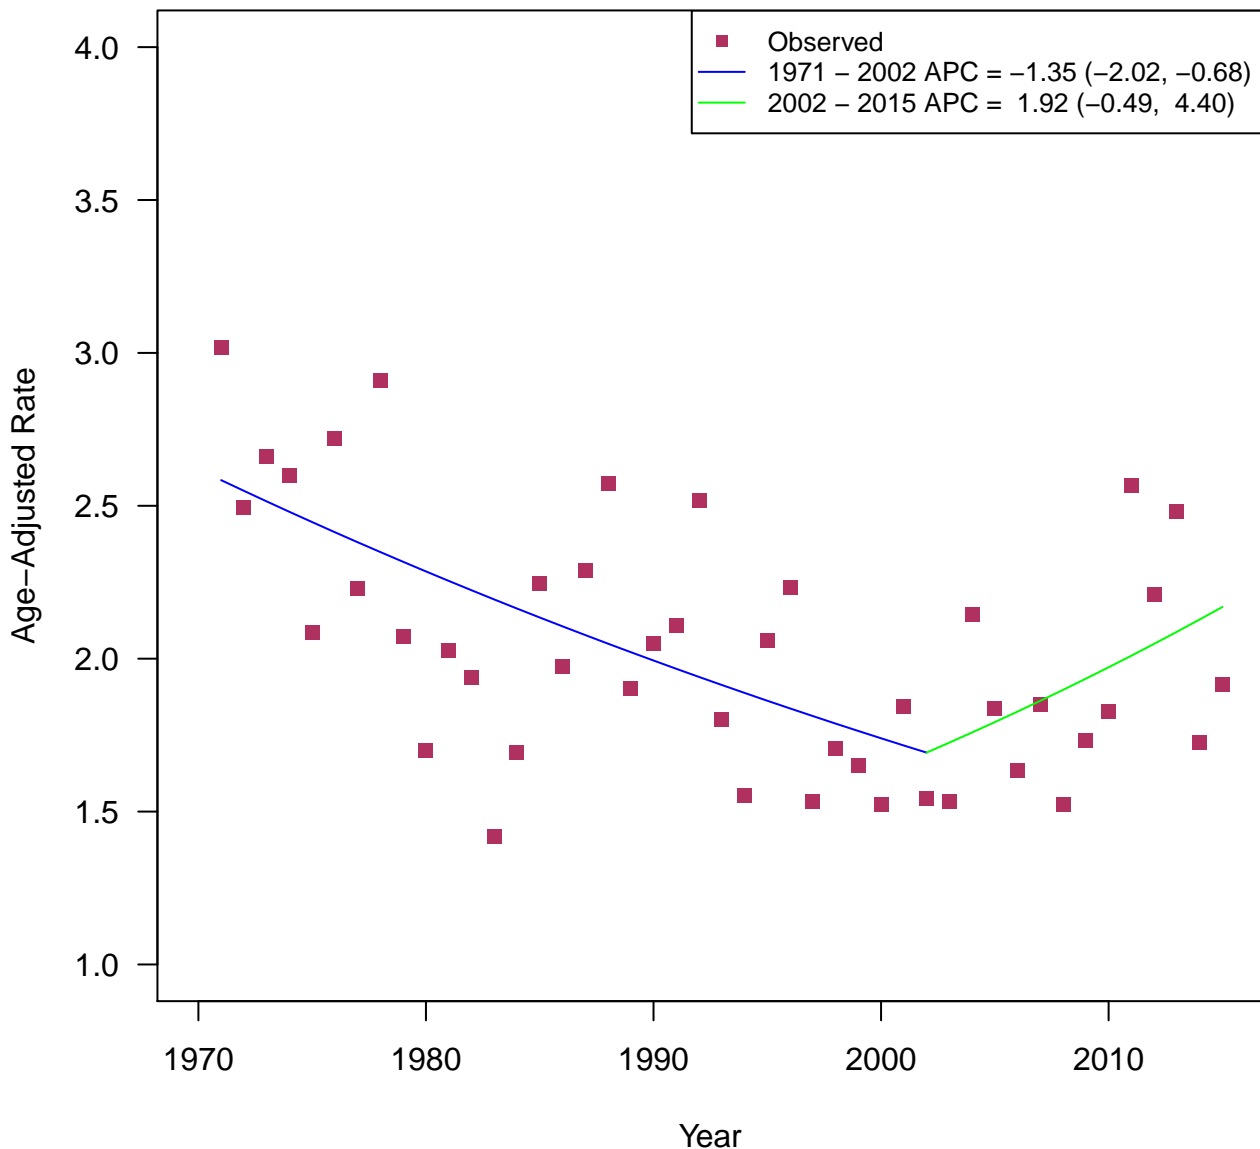

**Figure 281. Age-adjusted incidence rates of oral cancer in males aged 20–49 years in Canada, 1971–2015**

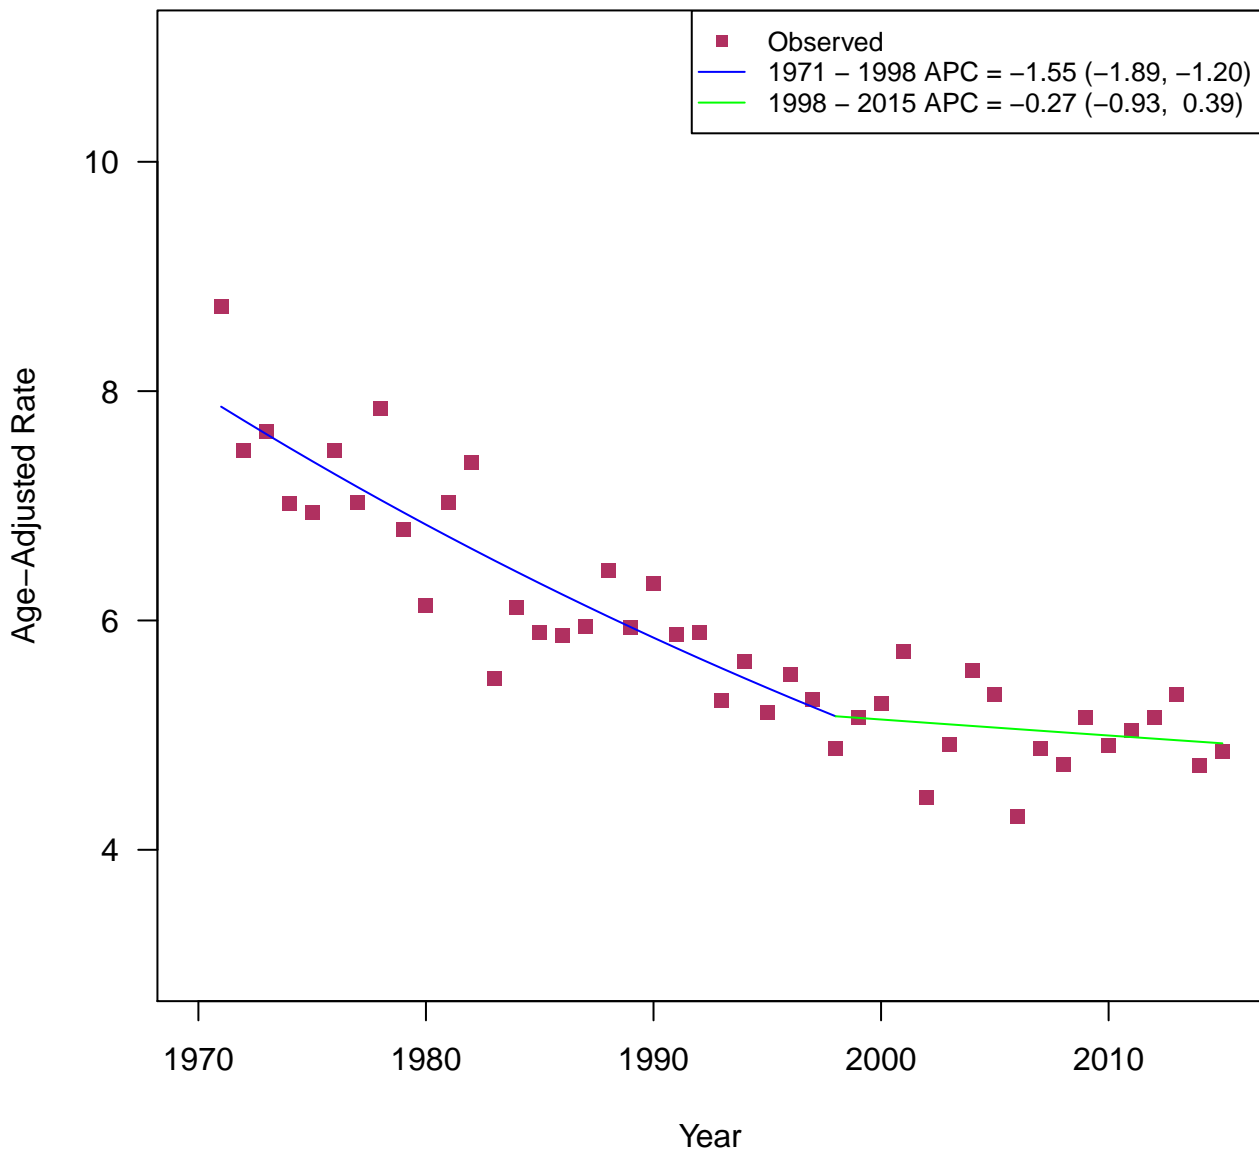

**Figure 282. Age-adjusted incidence rates of oral cancer in males aged 30–39 years in Canada, 1971–2015**

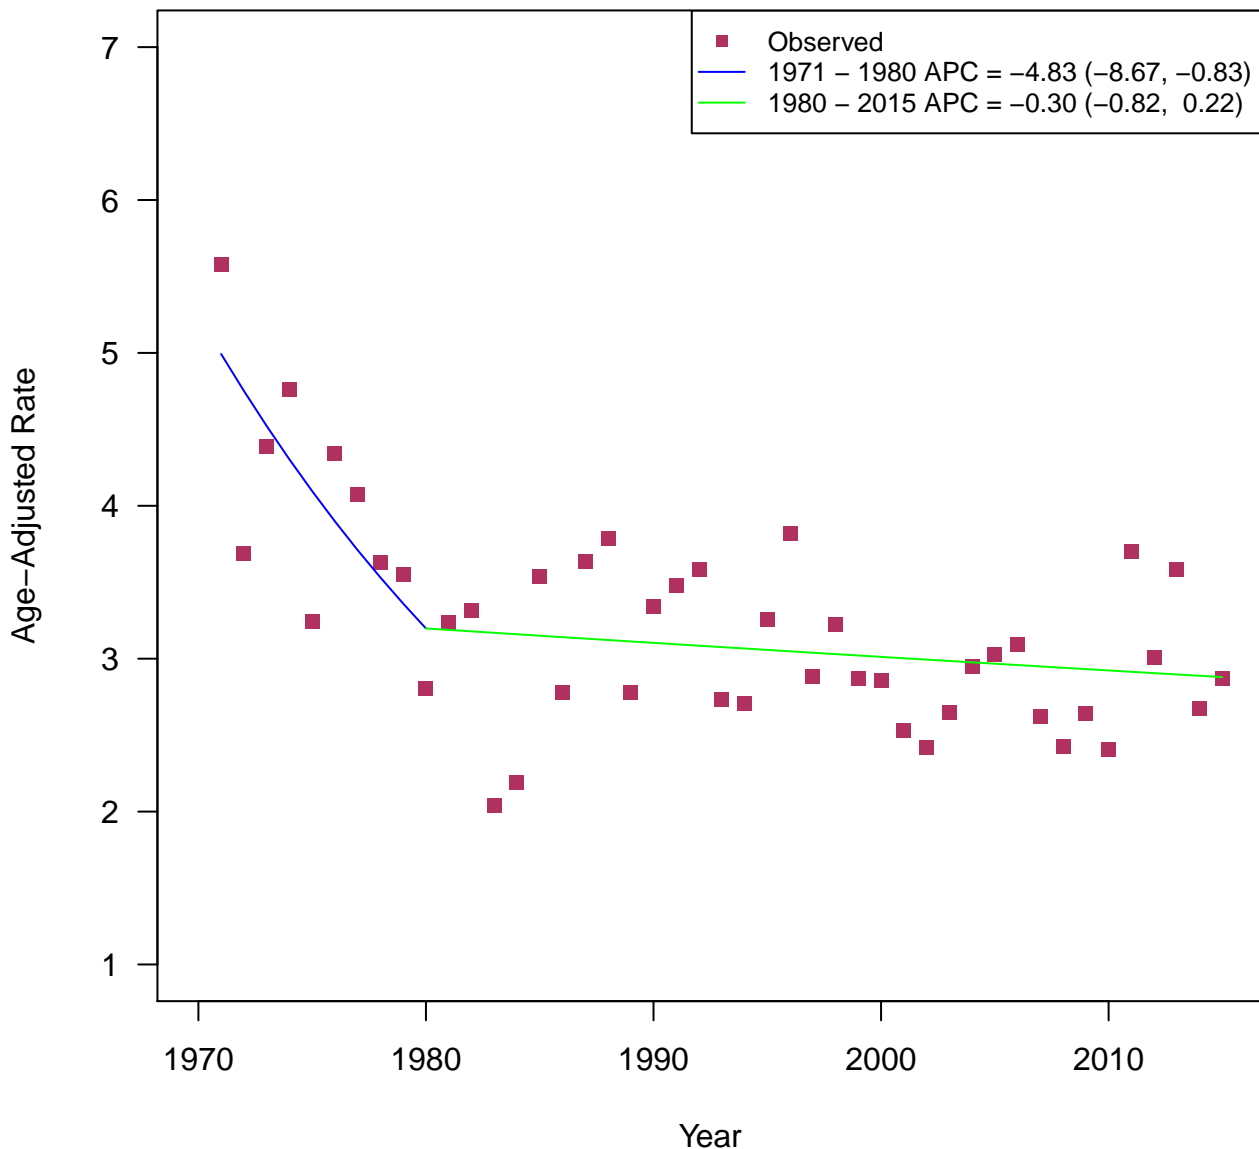

**Figure 283. Age-adjusted incidence rates of oral cancer in males aged 40–49 years in Canada, 1971–2015**

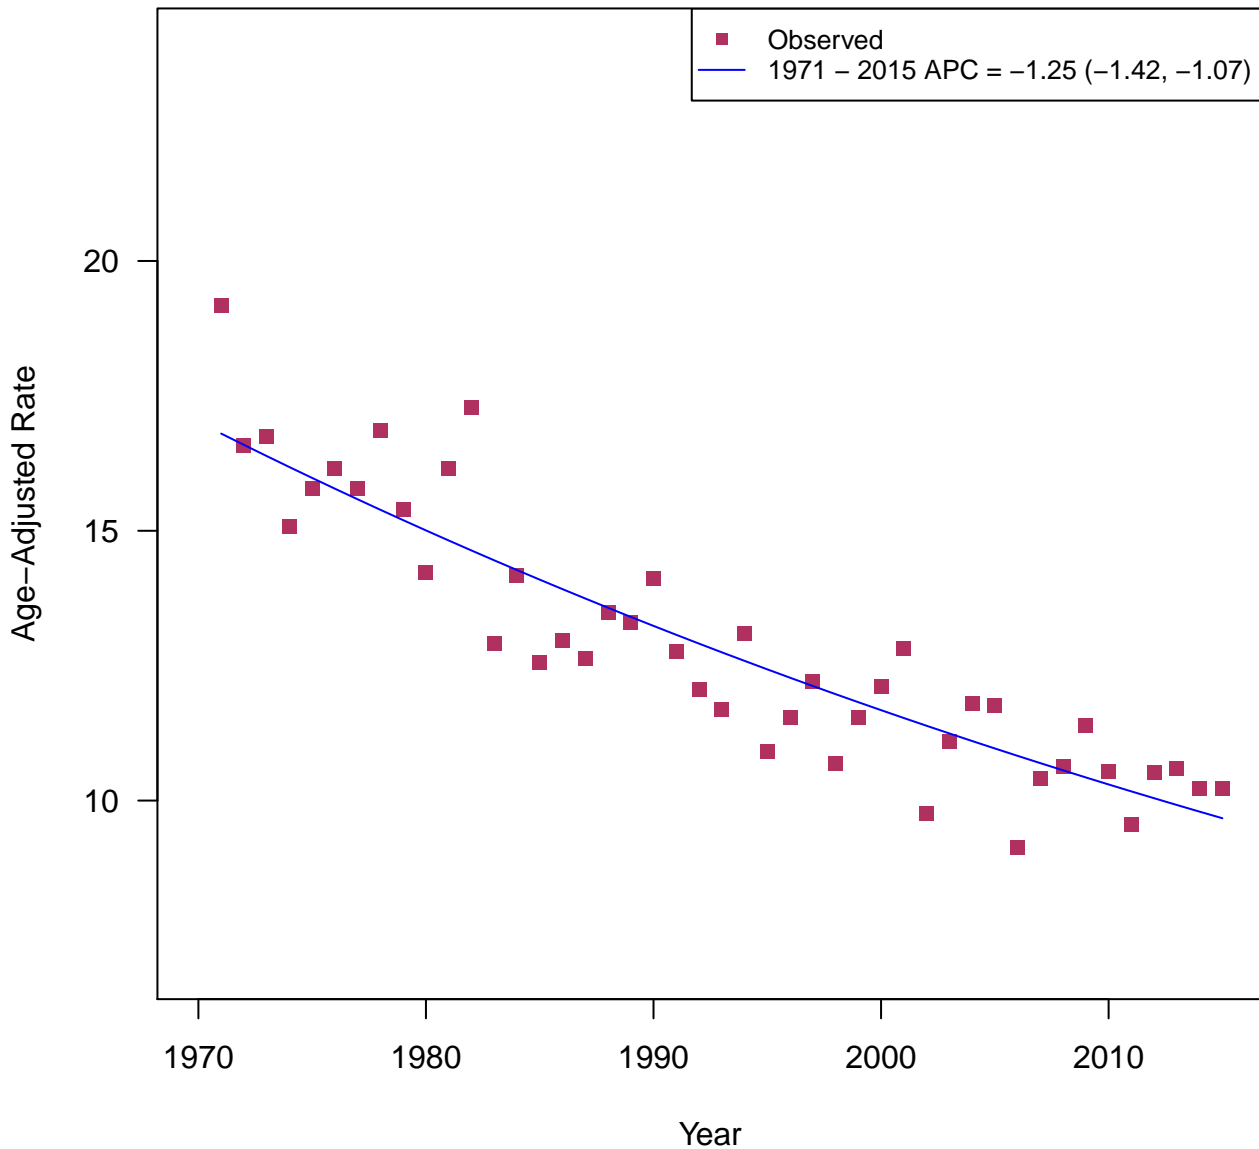



**Figure 284. Age-adjusted incidence rates of oral cancer in males aged 50–59 years in Canada, 1971–2015**

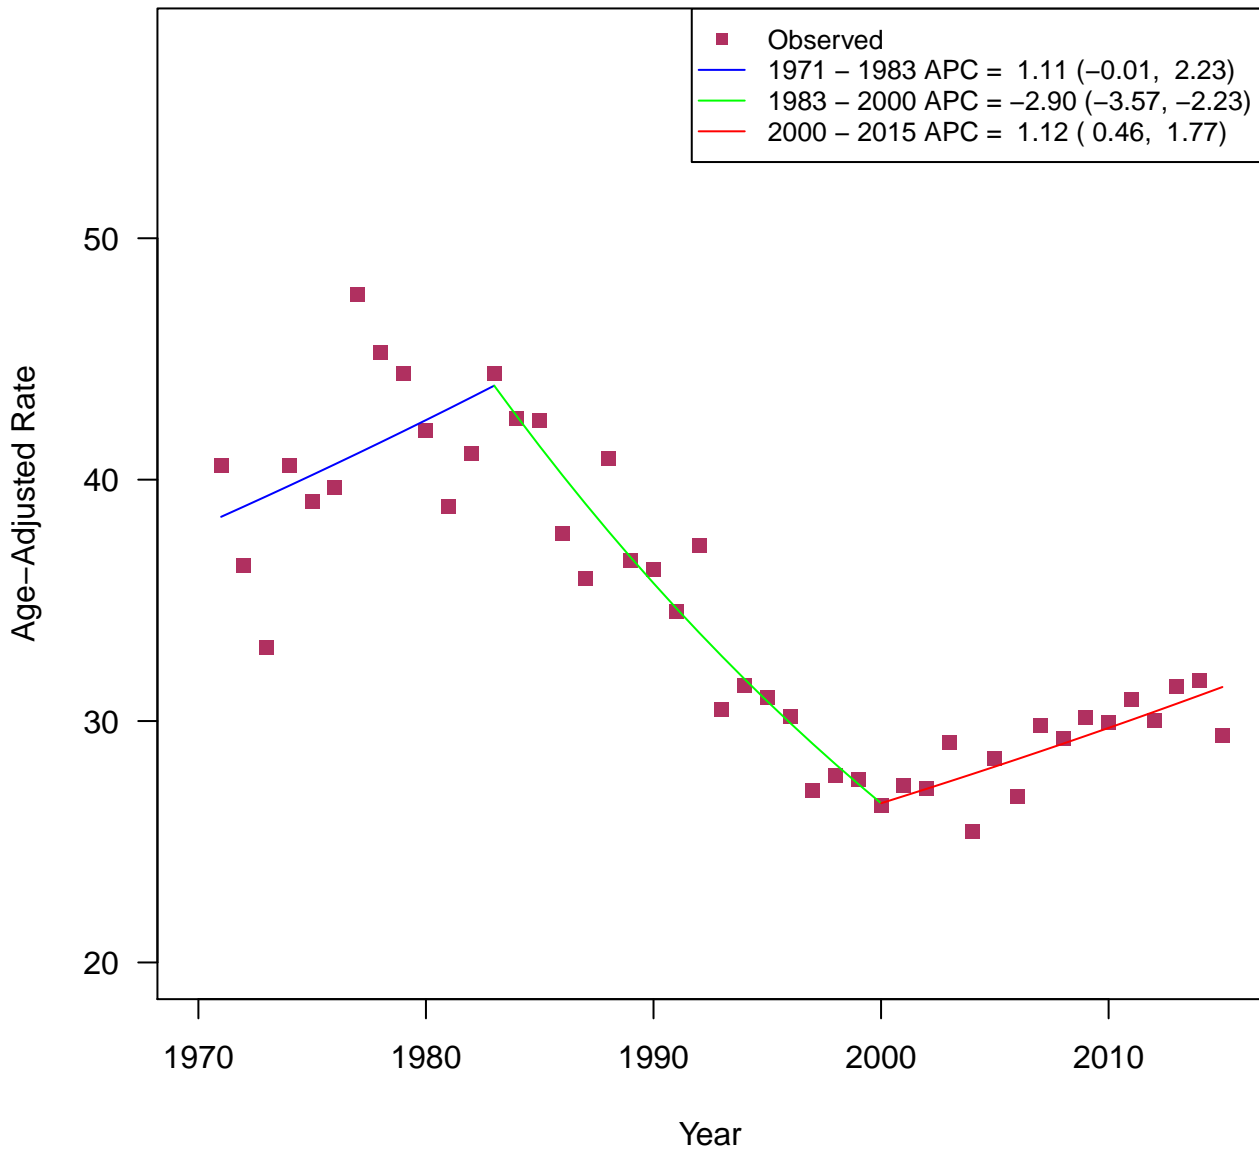

**Figure 285. Age-adjusted incidence rates of oral cancer in males aged 60–69 years in Canada, 1971–2015**

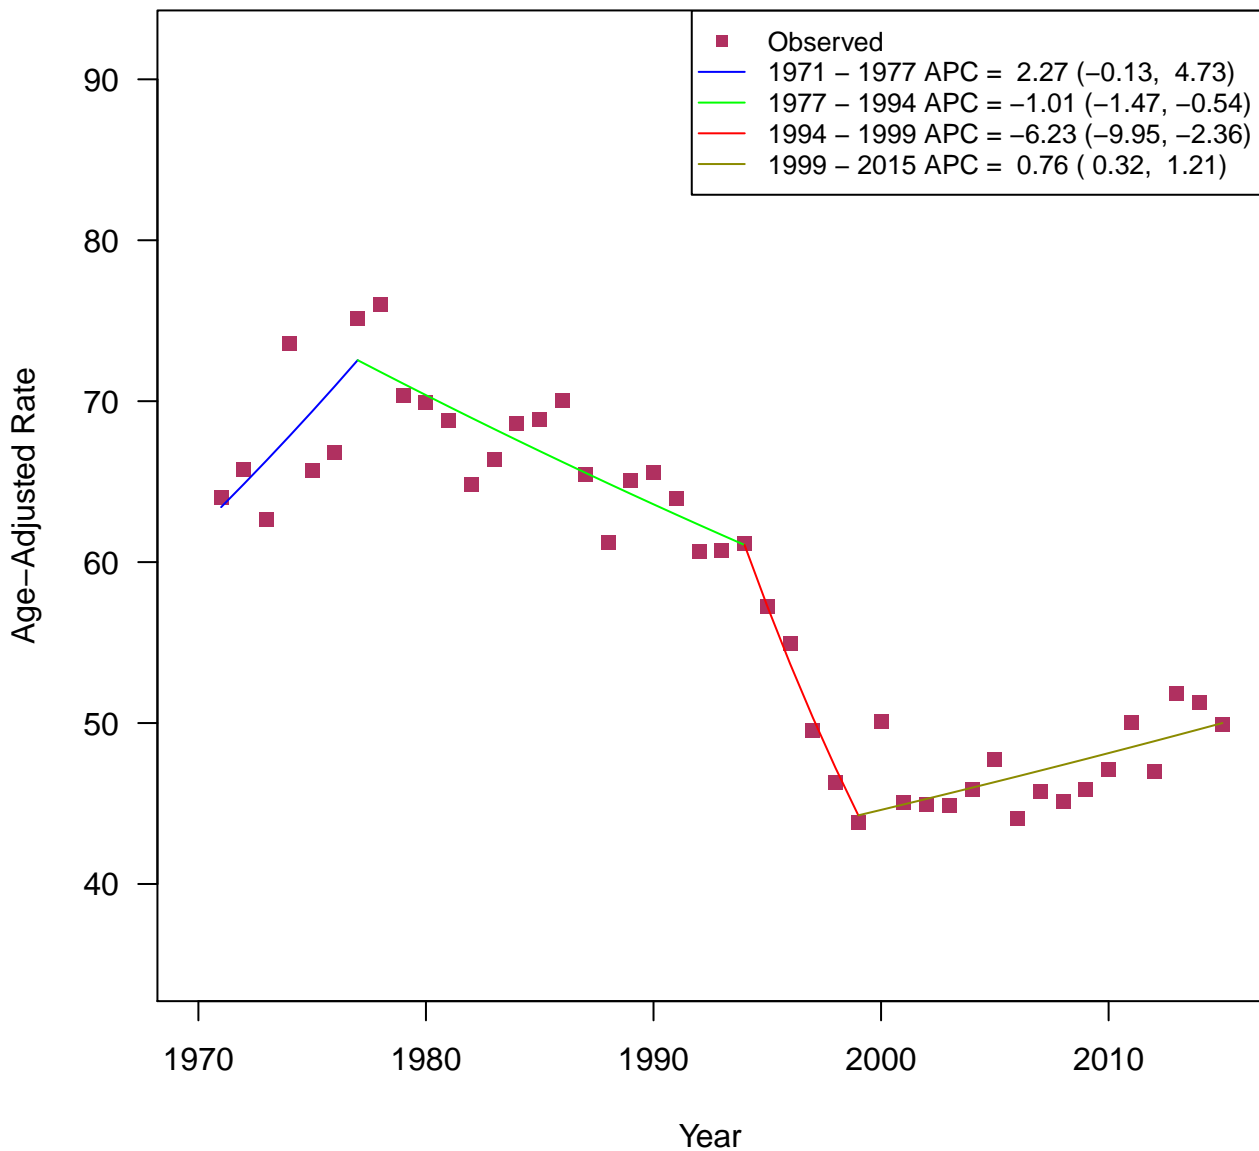

**Figure 286. Age-adjusted incidence rates of oral cancer in males aged 70–79 years in Canada, 1971–2015**

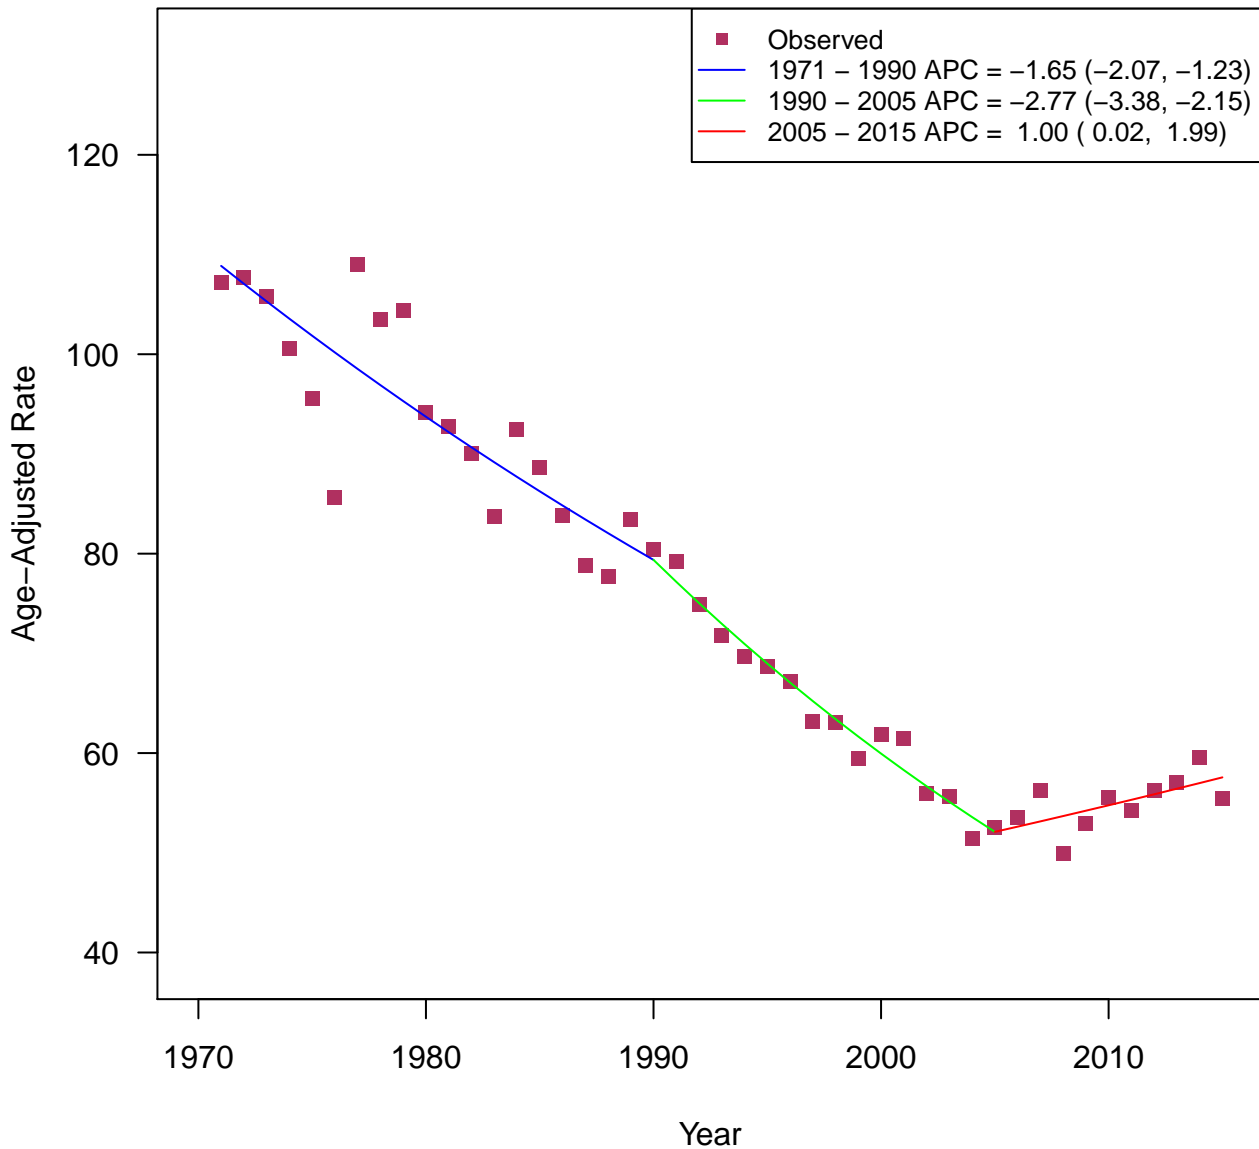

**Figure 287. Age-adjusted incidence rates of oral cancer in males aged 80–89 years in Canada, 1971–2015**

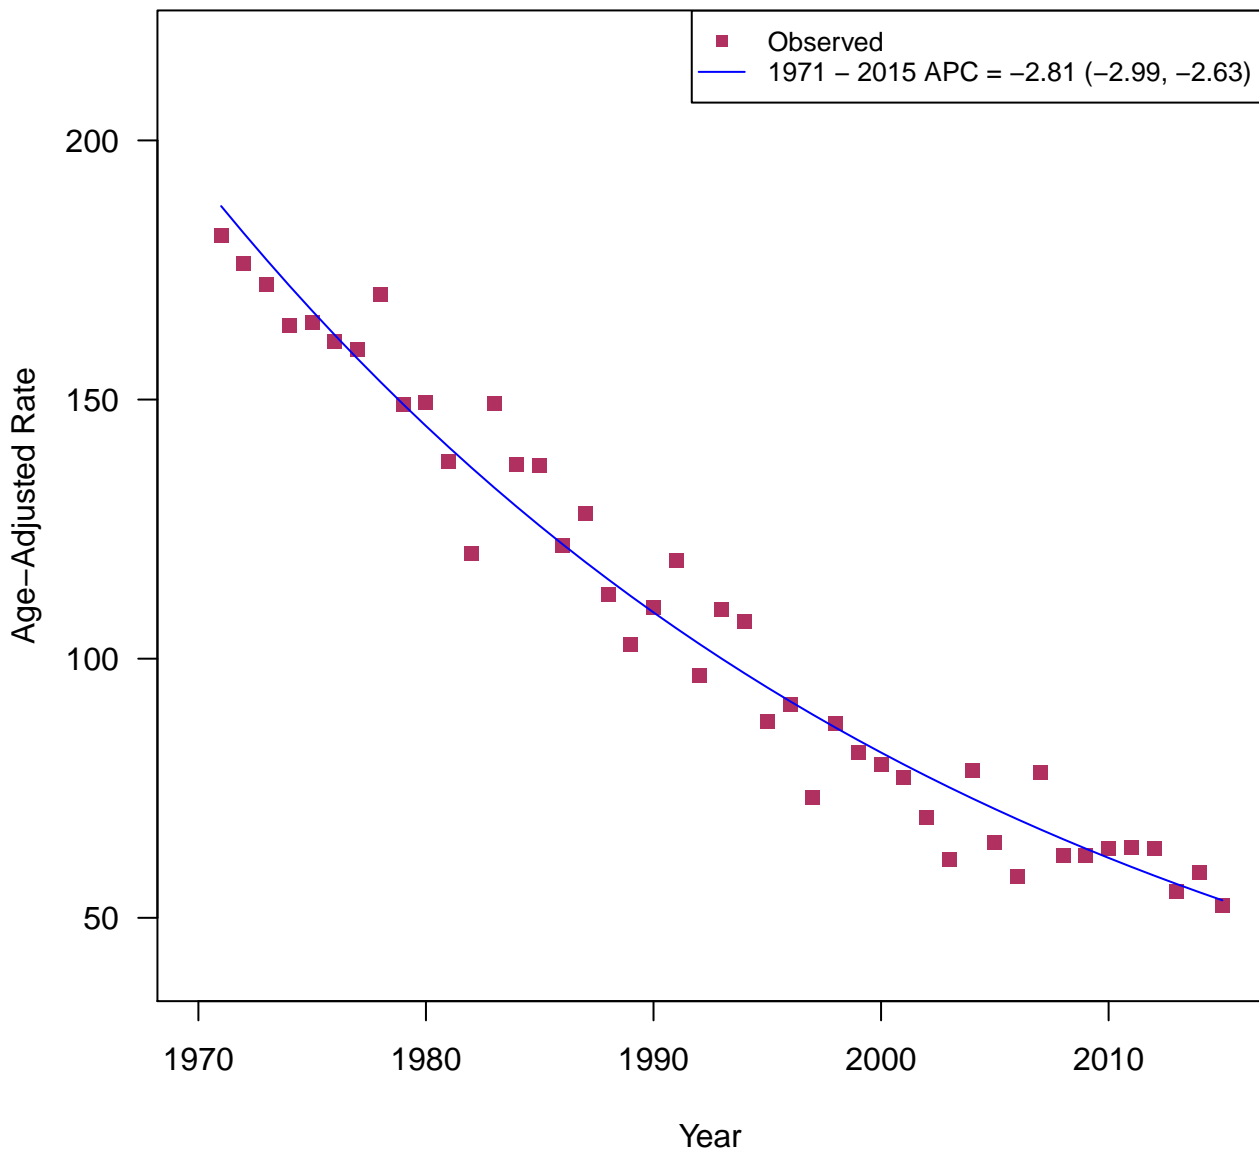

**Figure 288. Age-adjusted incidence rates of oral cancer in females aged 20–29 years in Canada, 1971–2015**

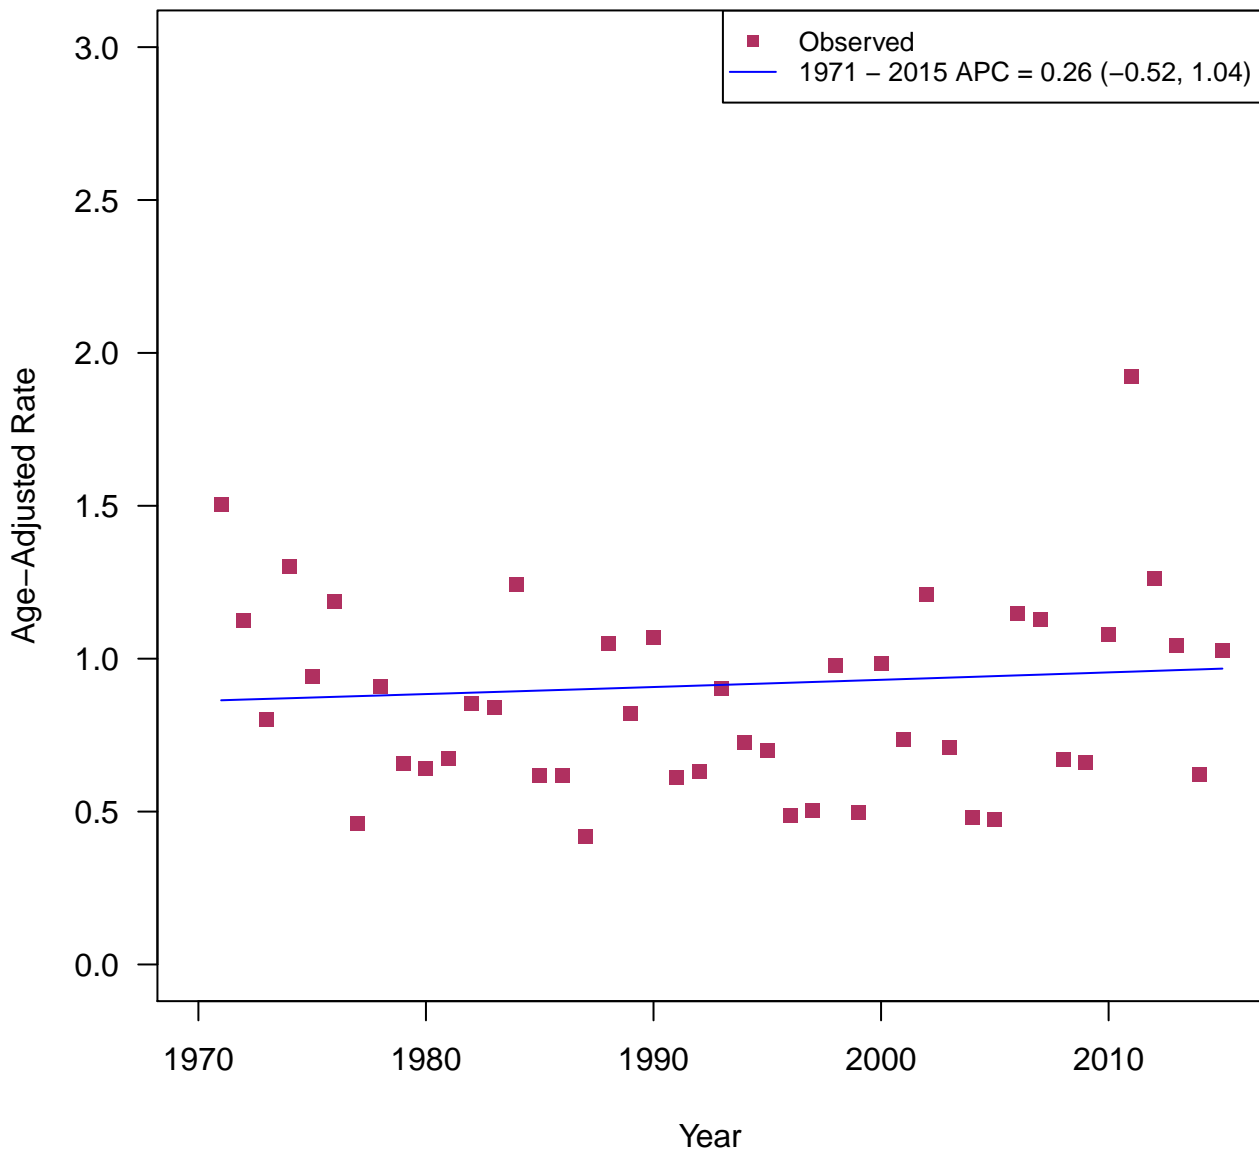

**Figure 289. Age-adjusted incidence rates of oral cancer in females aged 20–39 years in Canada, 1971–2015**

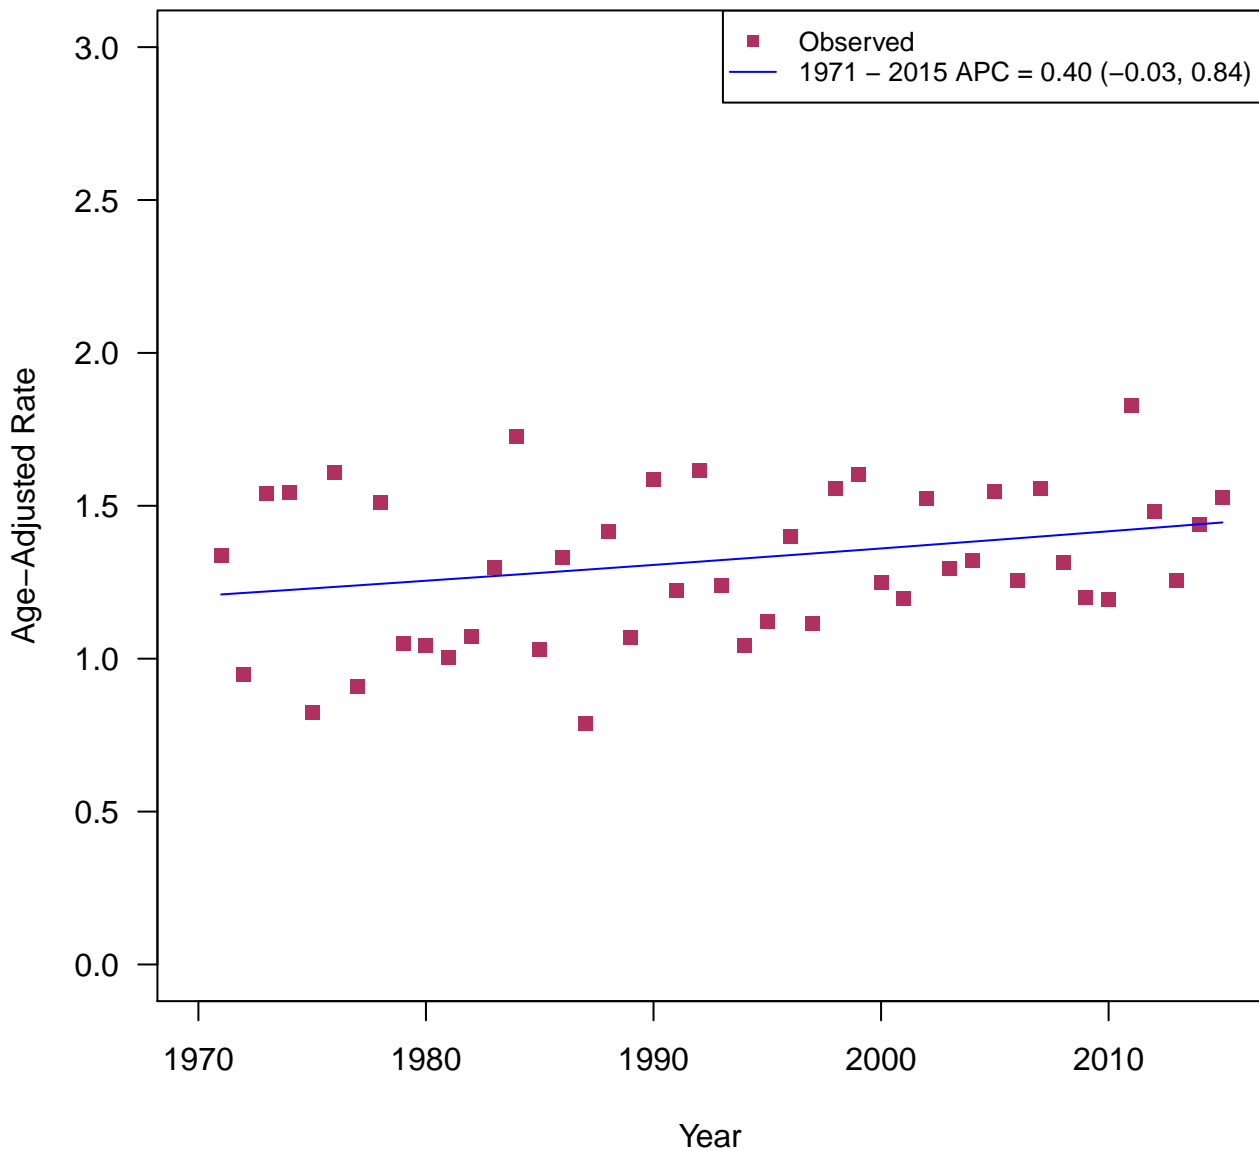

**Figure 290. Age-adjusted incidence rates of oral cancer in females aged 30–39 years in Canada, 1971–2015**

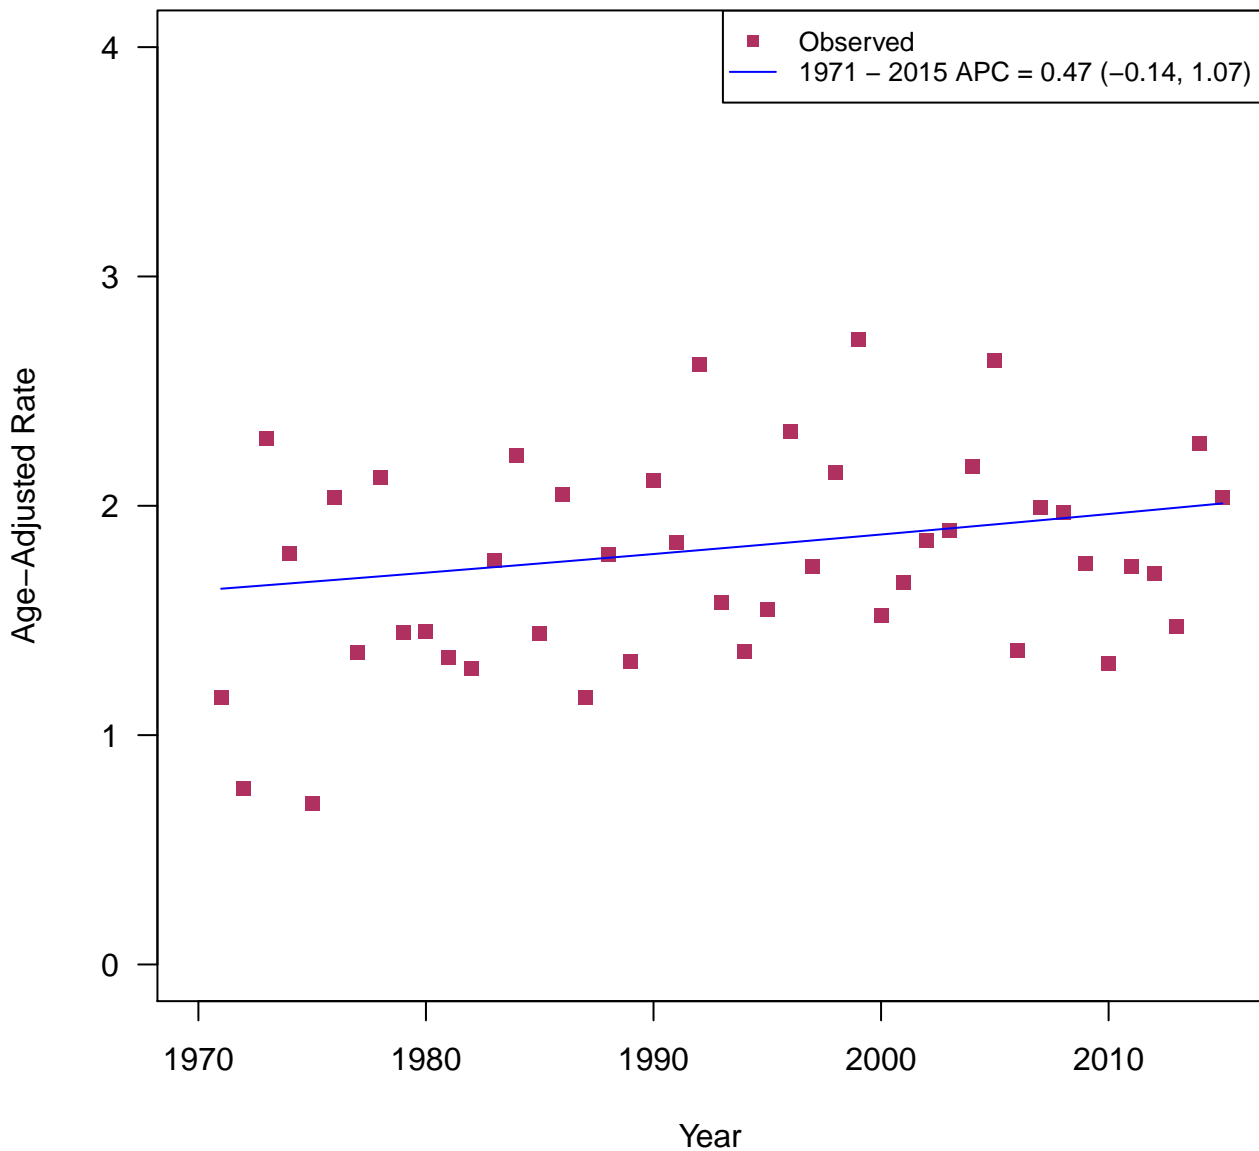

**Figure 291. Age-adjusted incidence rates of oral cancer in females aged 40–49 years in Canada, 1971–2015**

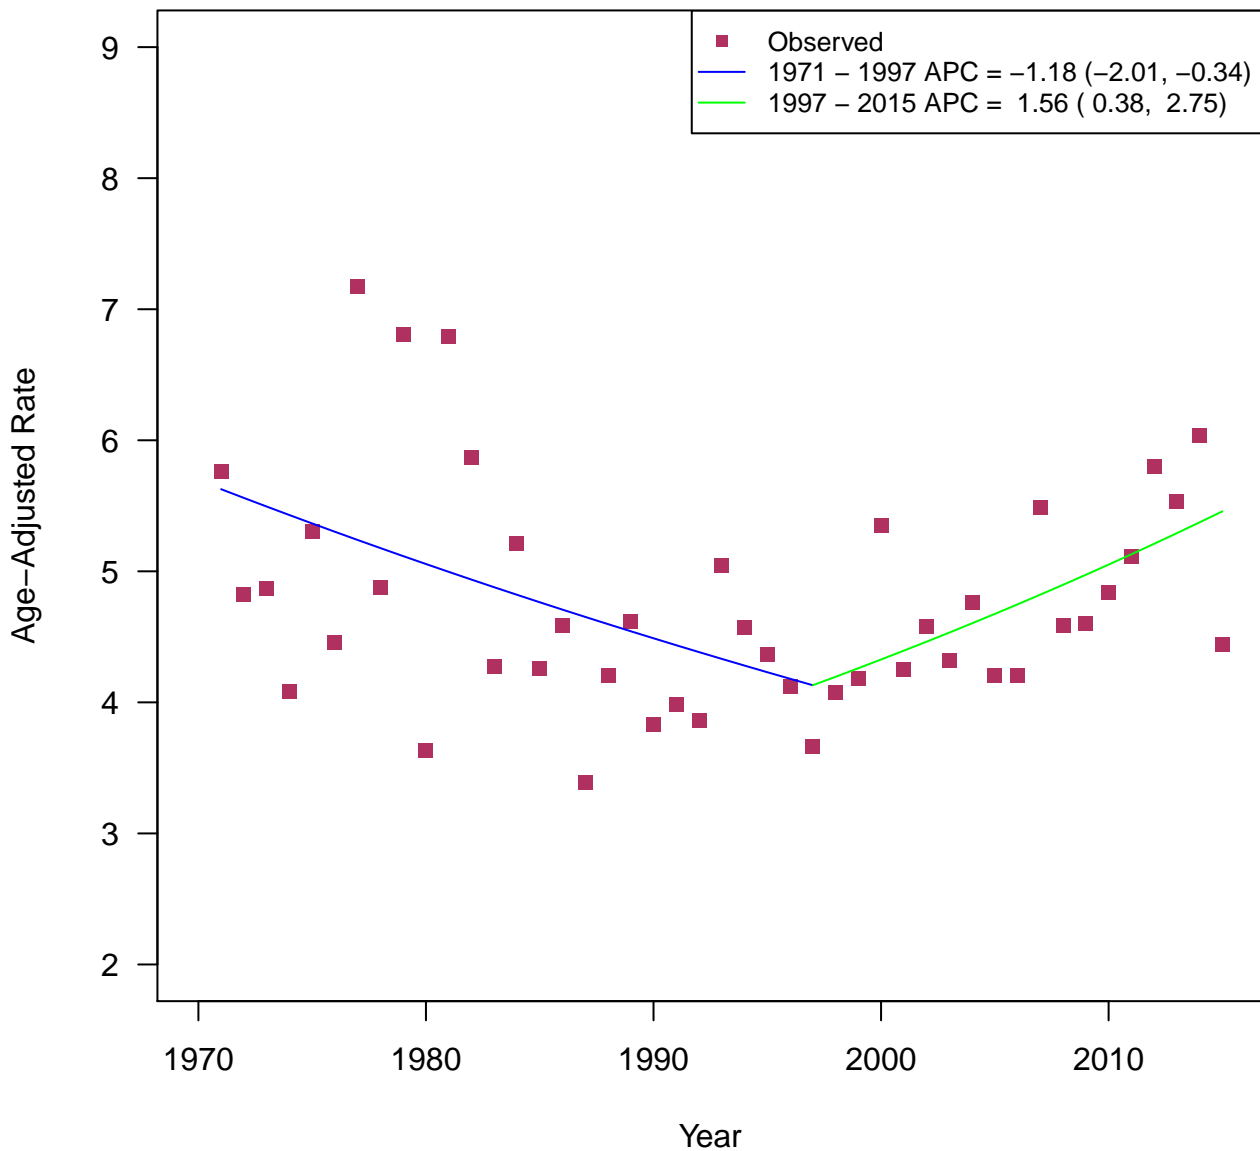



**Figure 292. Age-adjusted incidence rates of oral cancer in females aged 50–59 years in Canada, 1971–2015**

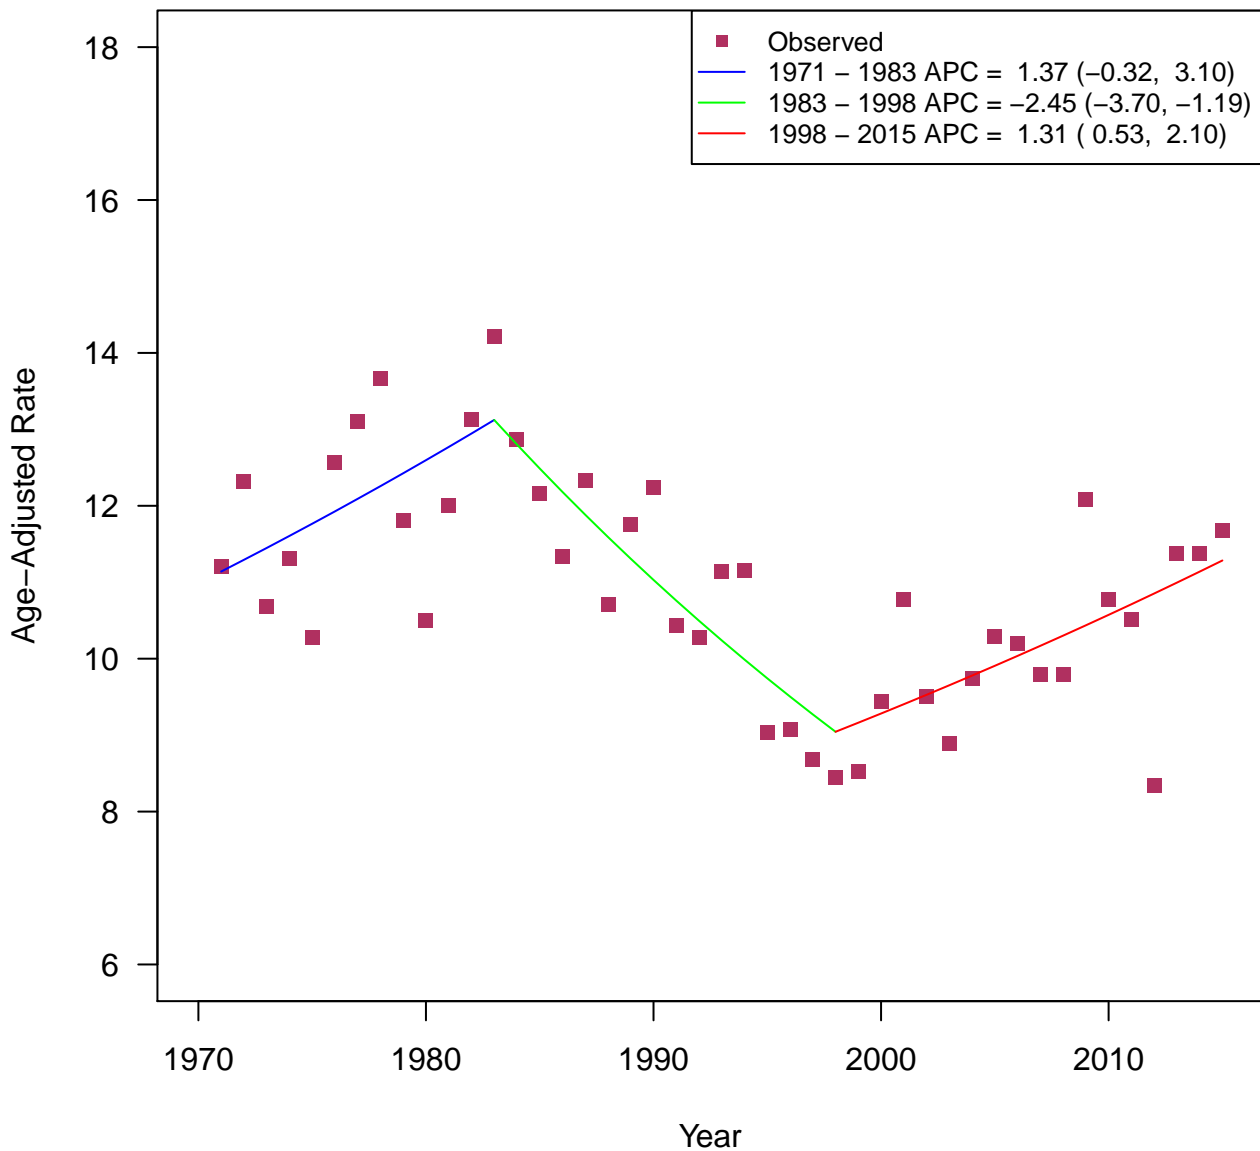

**Figure 293. Age-adjusted incidence rates of oral cancer in females aged 60–69 years in Canada, 1971–2015**

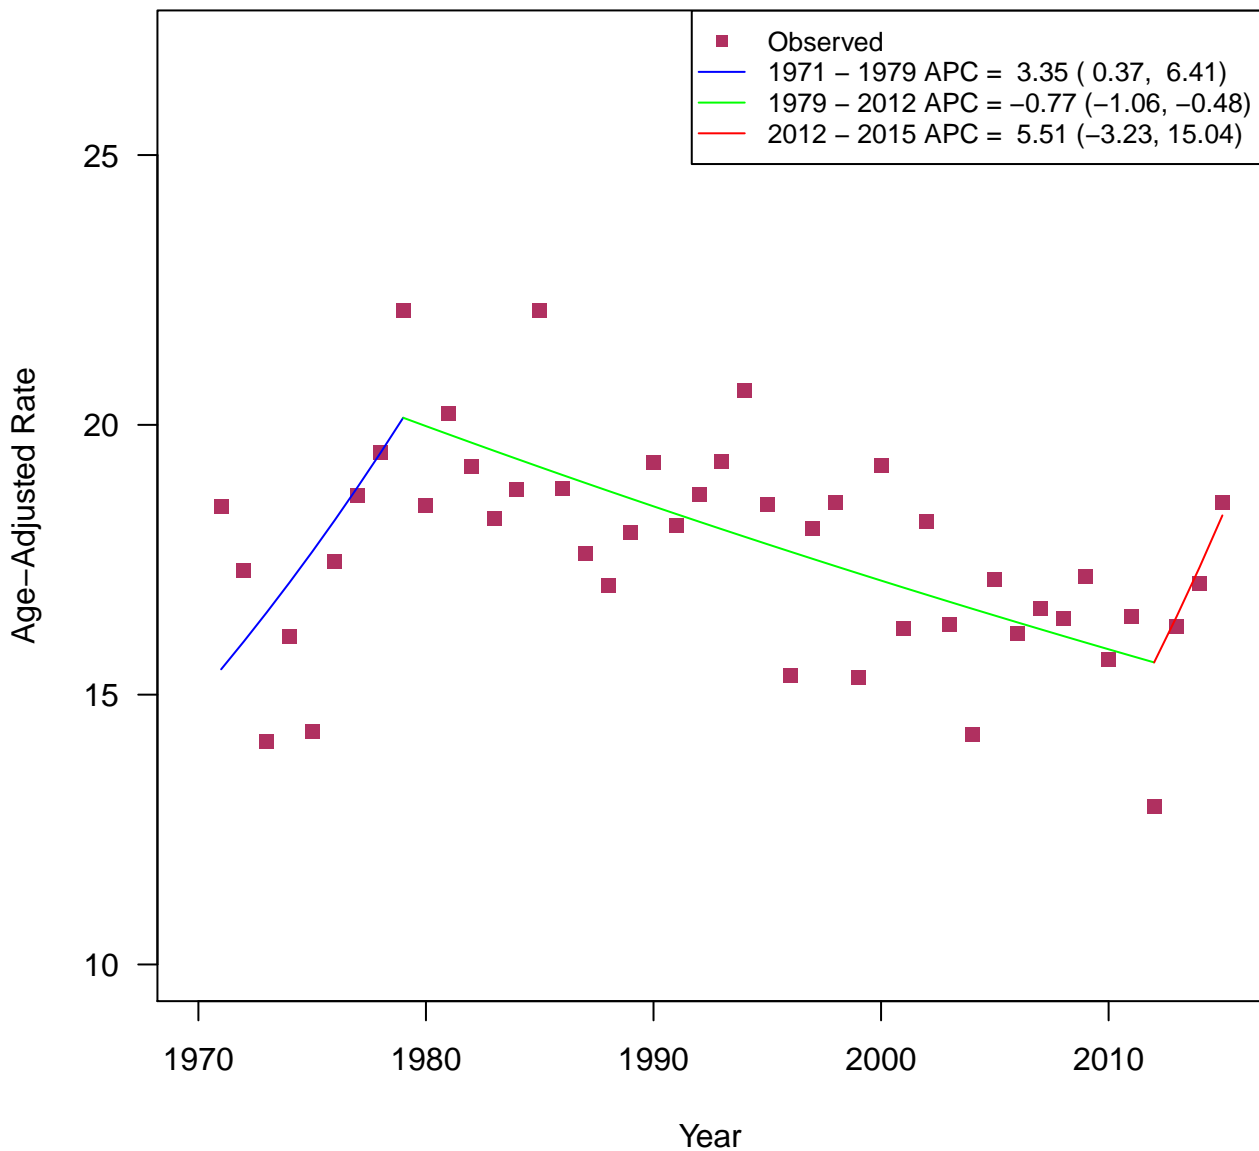

**Figure 294. Age-adjusted incidence rates of oral cancer in females aged 70–79 years in Canada, 1971–2015**

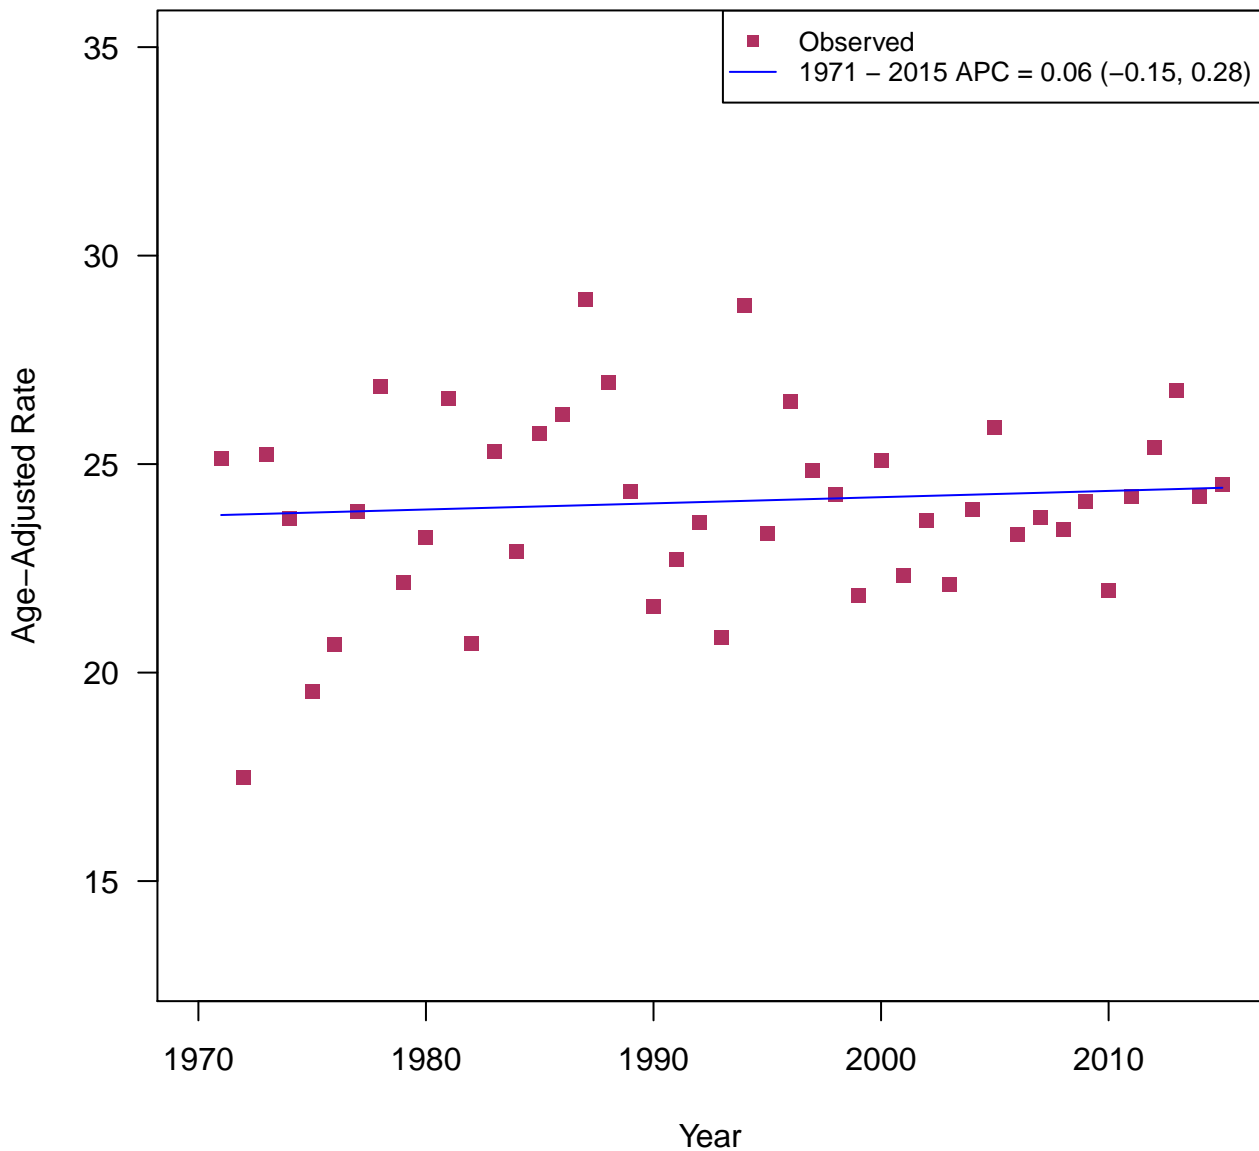

**Figure 295. Age-adjusted incidence rates of oral cancer in females aged 80–89 years in Canada, 1971–2015**

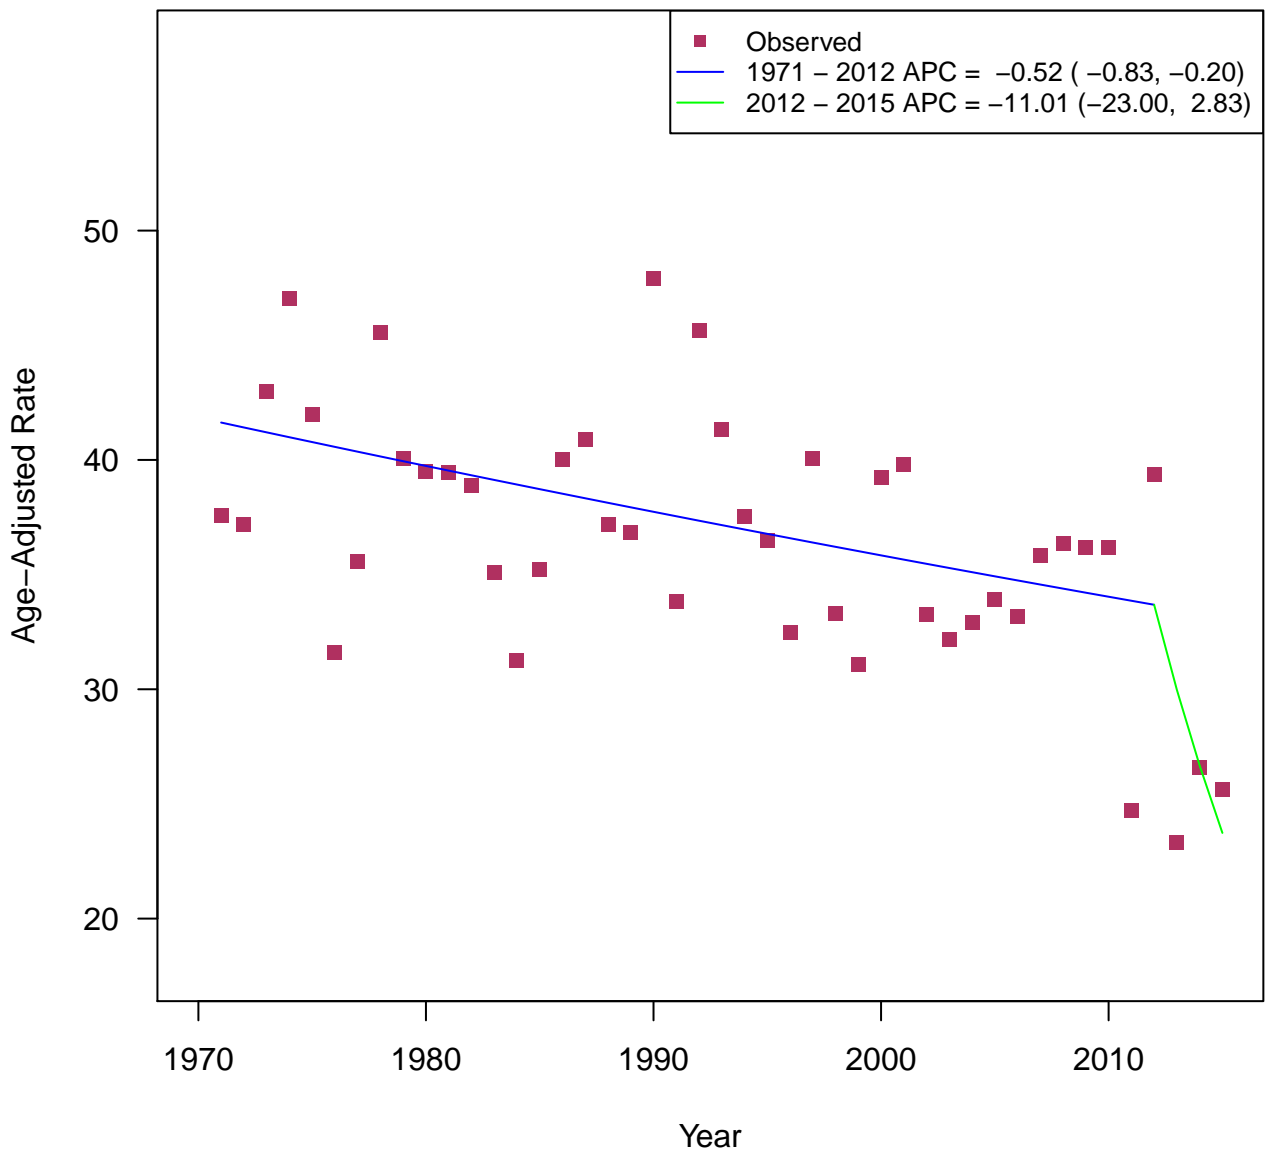

**Figure 296. Age-adjusted incidence rates of ovarian cancer in females aged 20–29 years in Canada, 1971–2015**

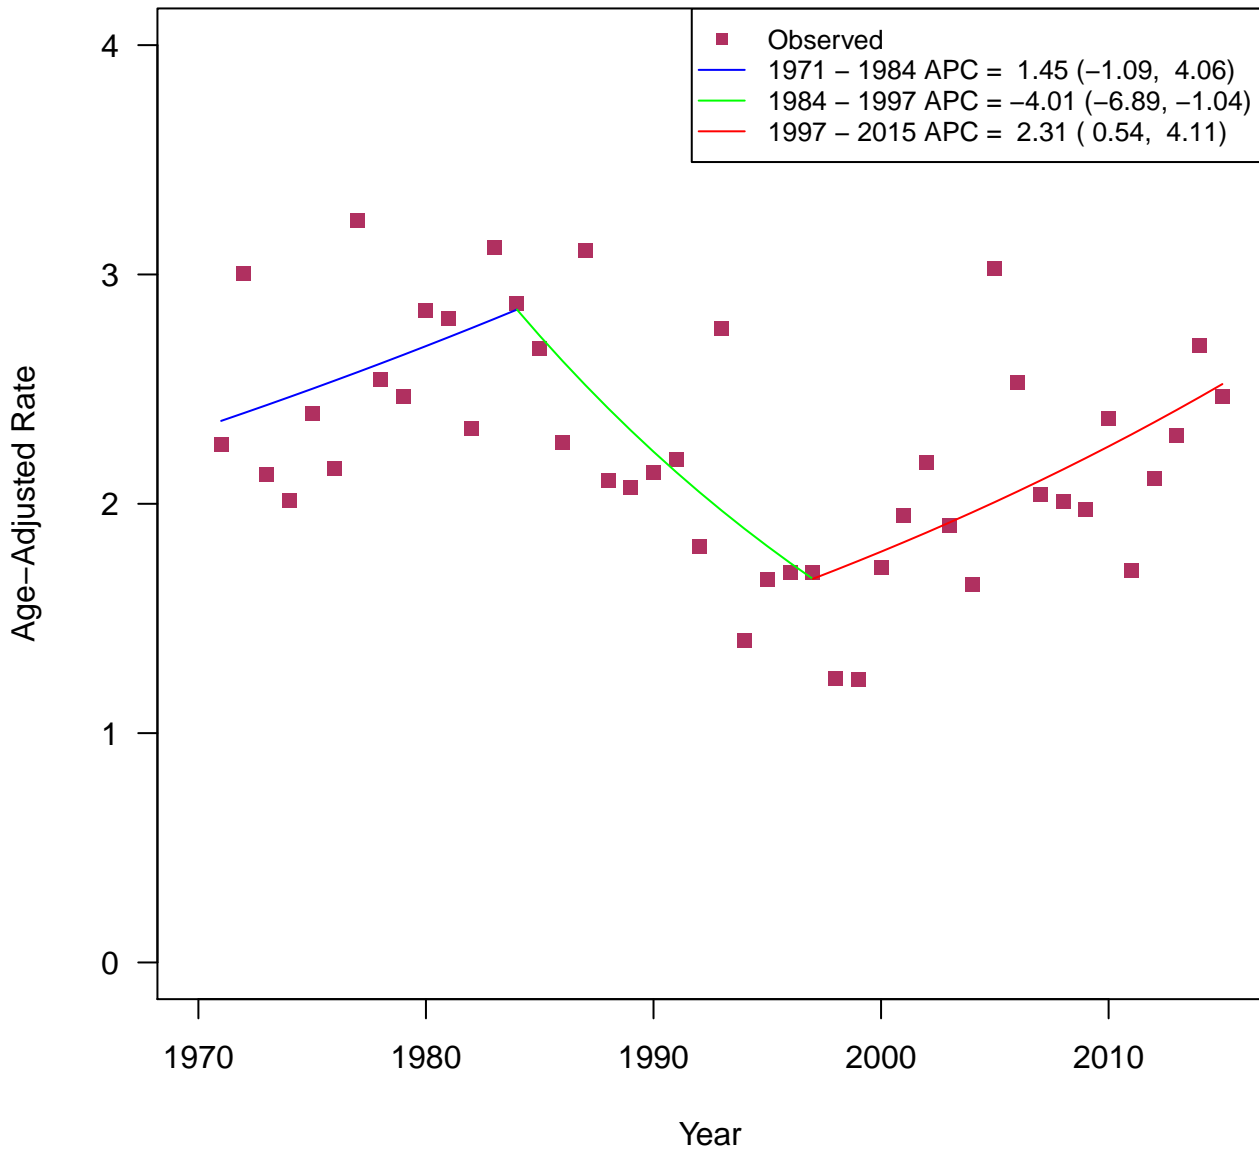

**Figure 297. Age-adjusted incidence rates of ovarian cancer in females aged 20–39 years in Canada, 1971–2015**

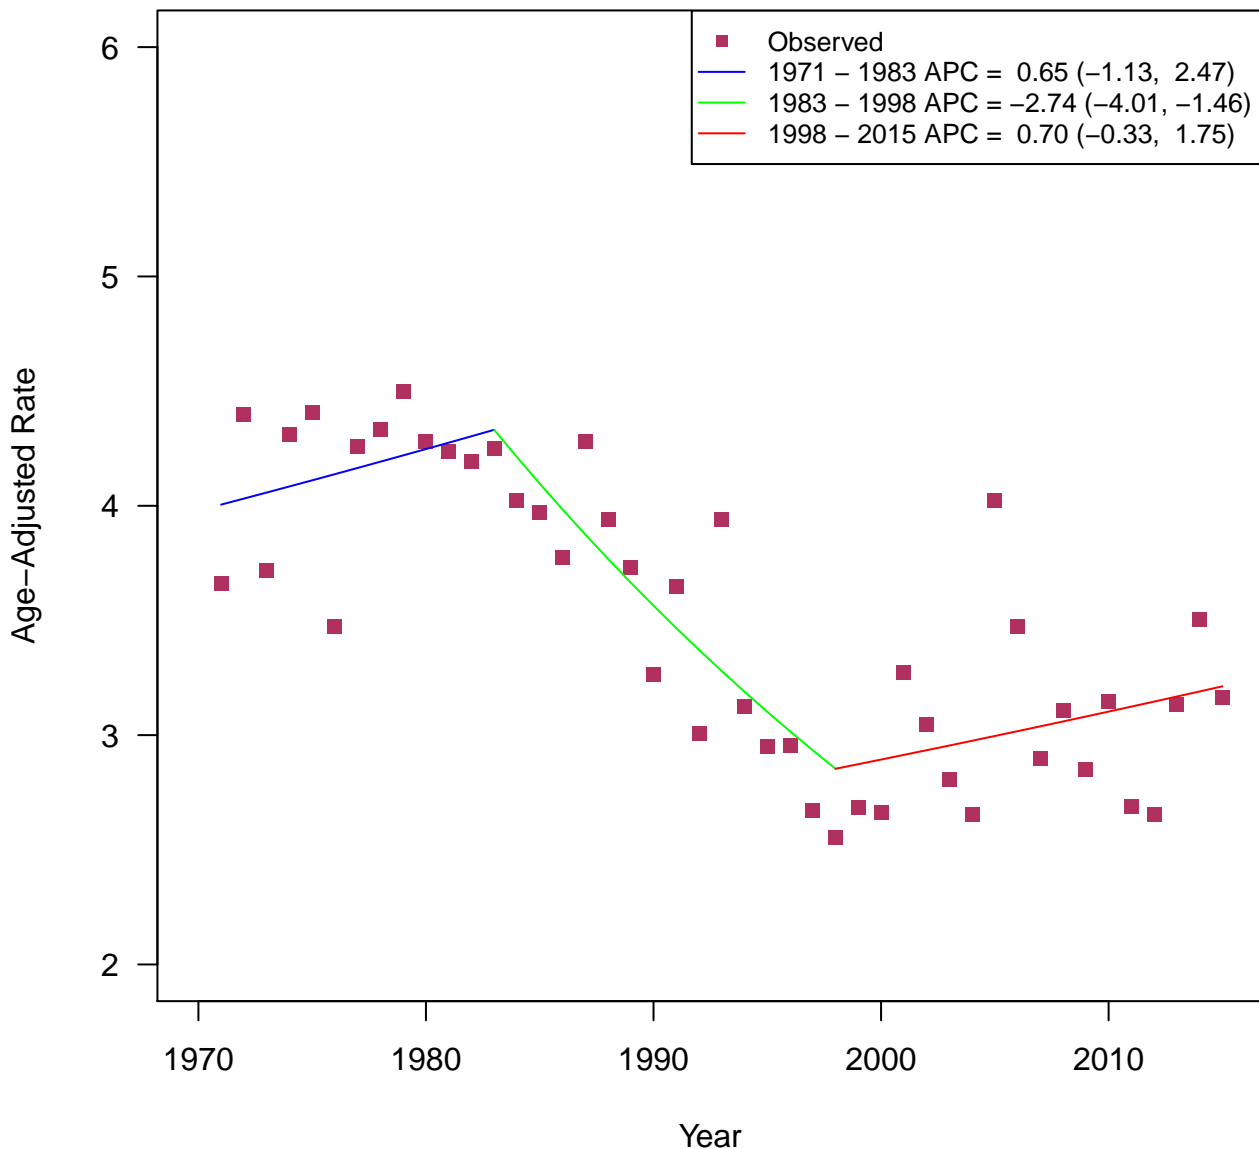

**Figure 298. Age-adjusted incidence rates of ovarian cancer in females aged 30–39 years in Canada, 1971–2015**

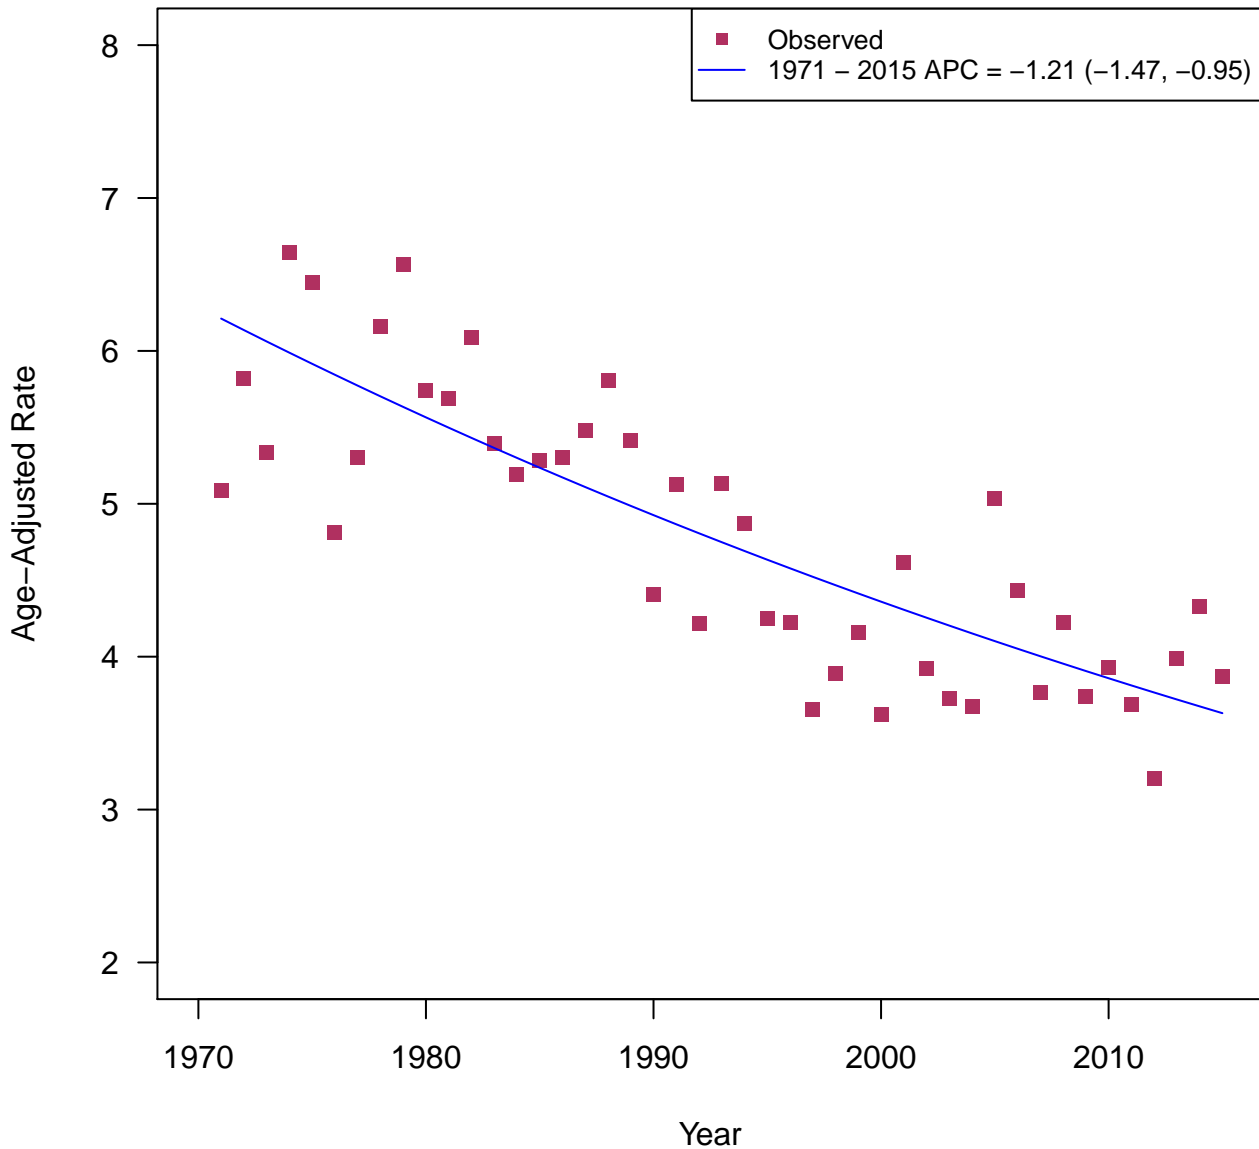

**Figure 299. Age-adjusted incidence rates of ovarian cancer in females aged 40–49 years in Canada, 1971–2015**

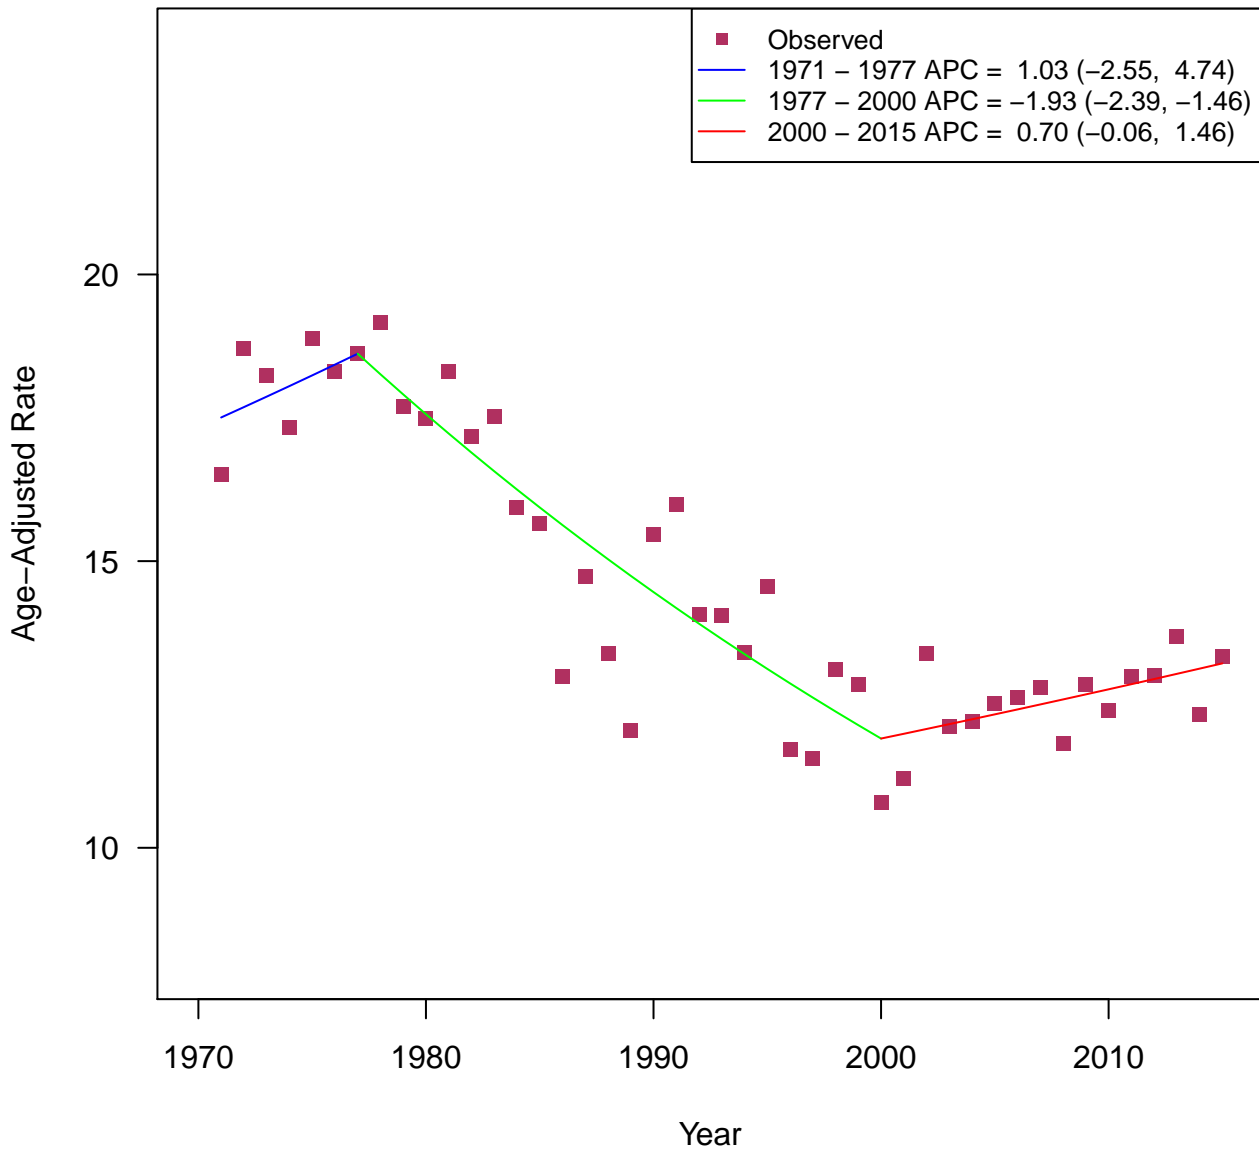



**Figure 300. Age-adjusted incidence rates of ovarian cancer in females aged 50–59 years in Canada, 1971–2015**

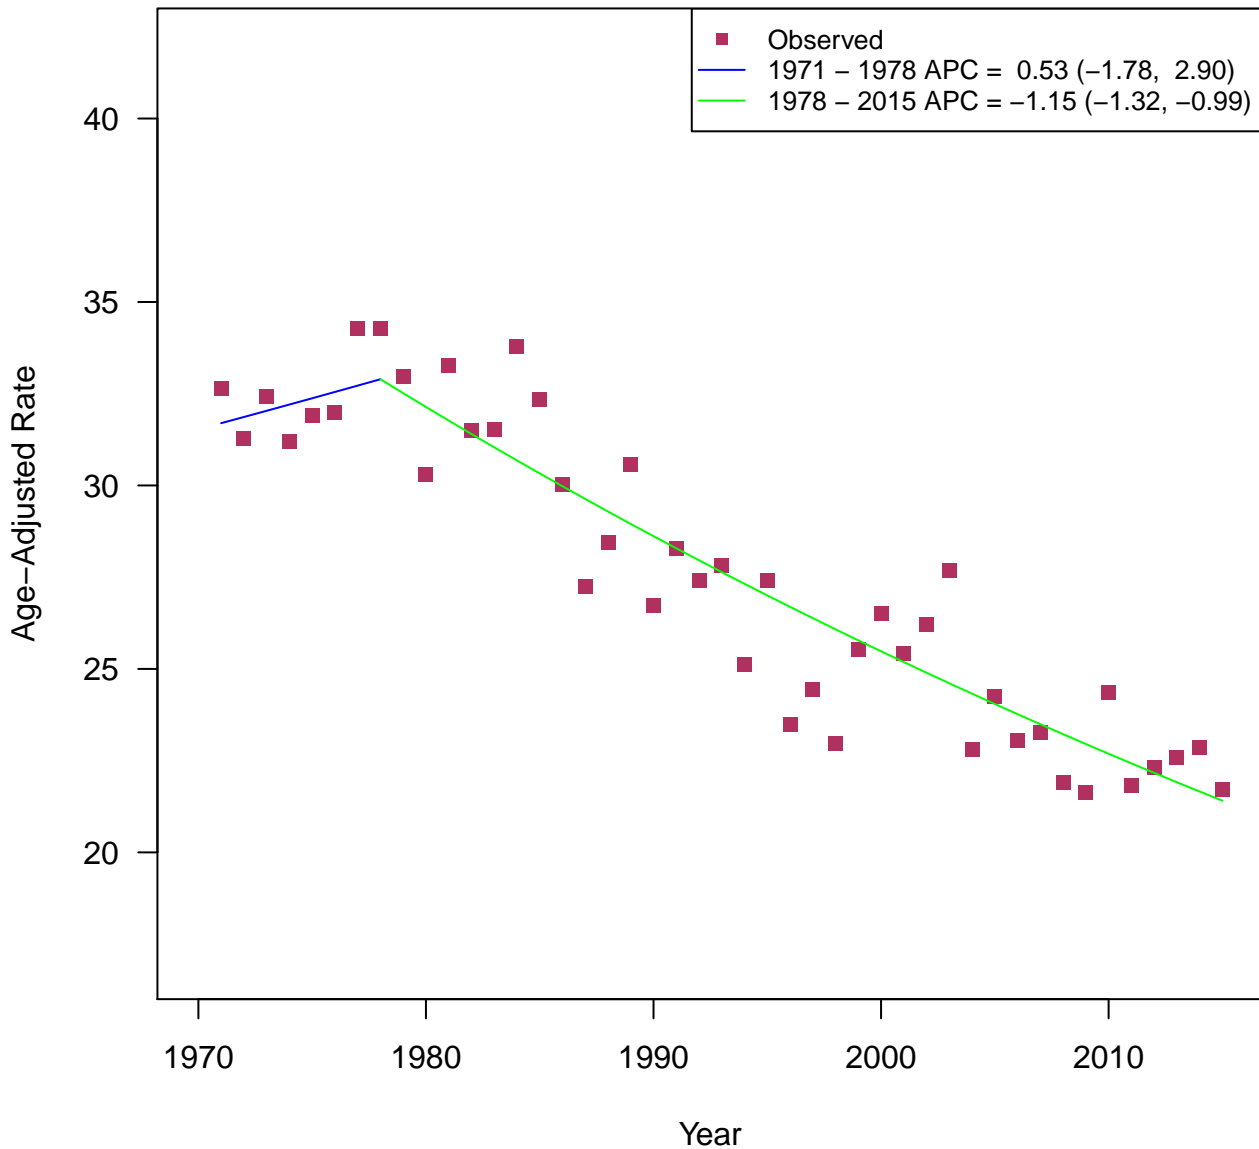

**Figure 301. Age-adjusted incidence rates of ovarian cancer in females aged 60–69 years in Canada, 1971–2015**

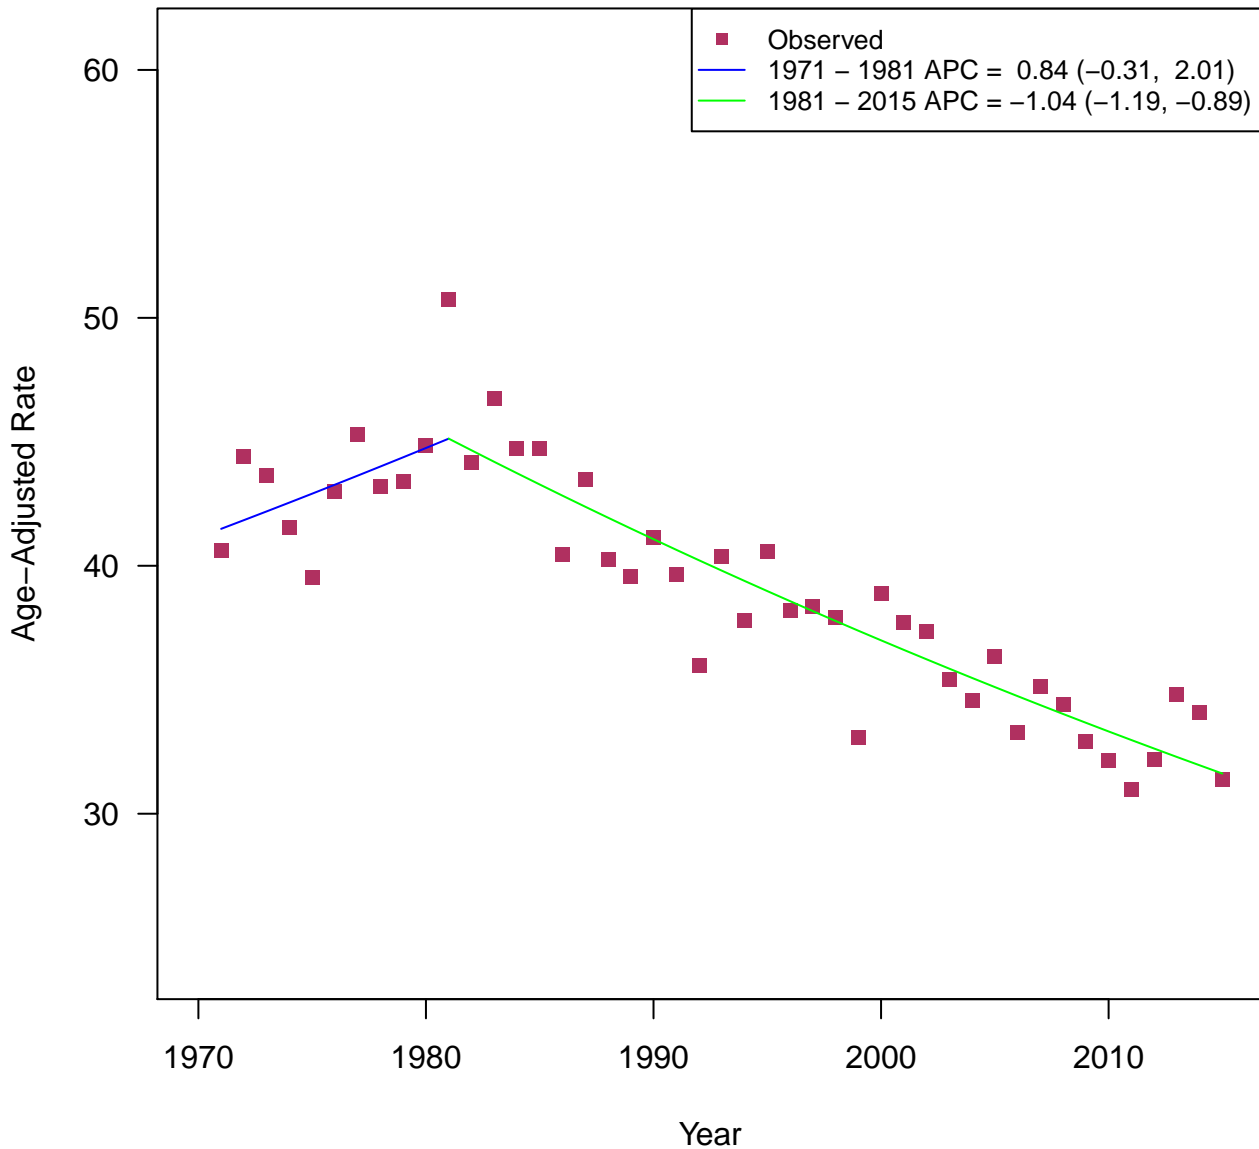

**Figure 302. Age-adjusted incidence rates of ovarian cancer in females aged 70–79 years in Canada, 1971–2015**

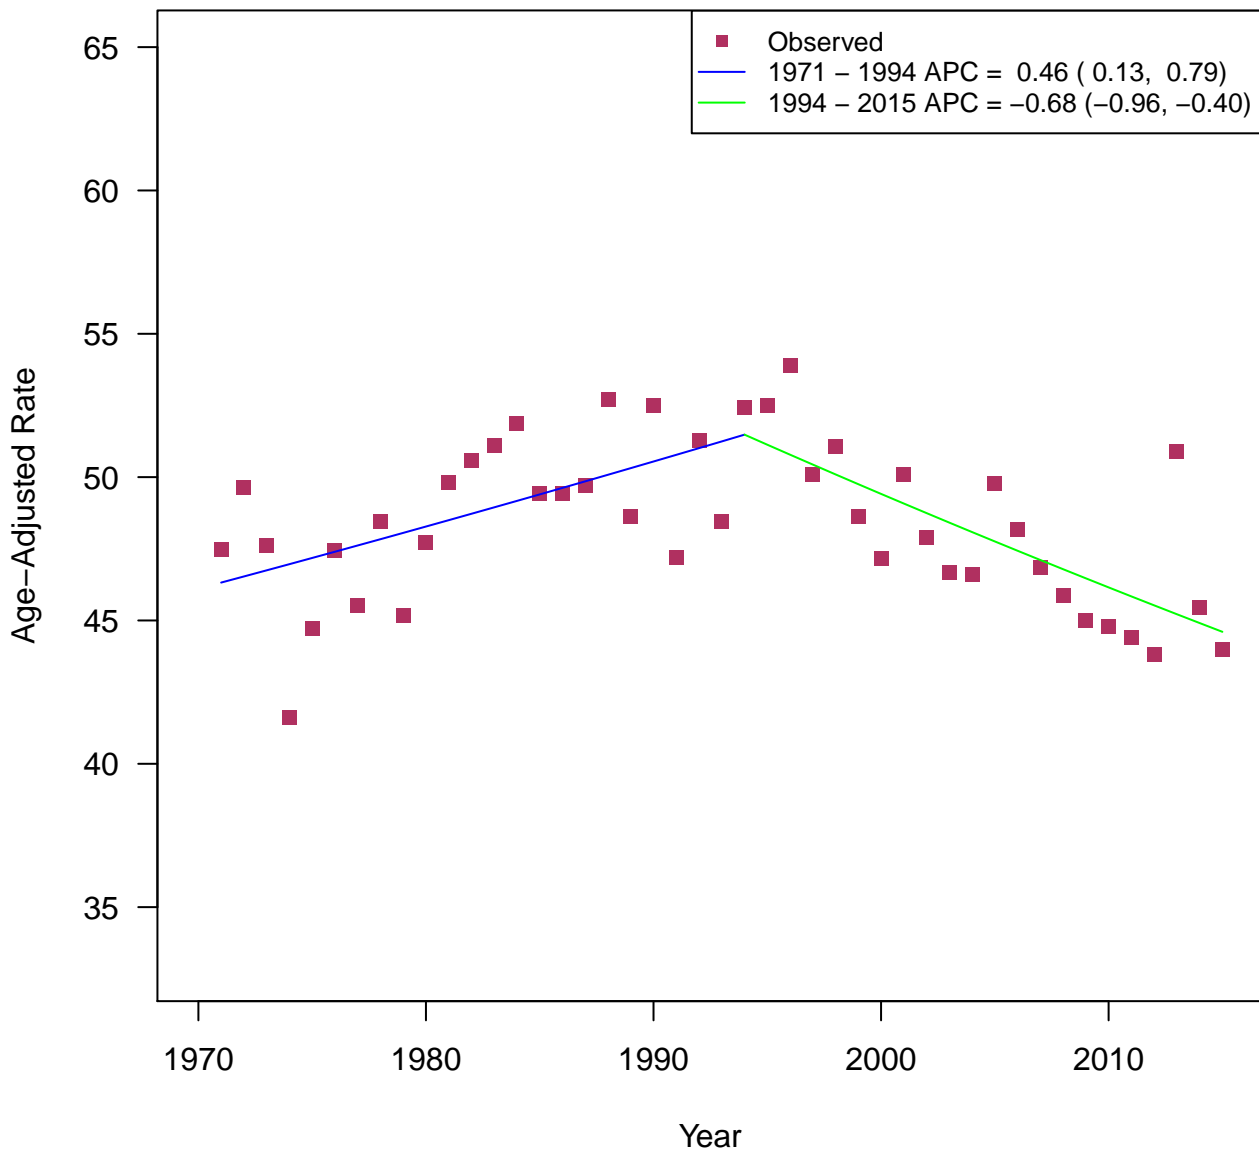

**Figure 303. Age-adjusted incidence rates of ovarian cancer in females aged 80–89 years in Canada, 1971–2015**

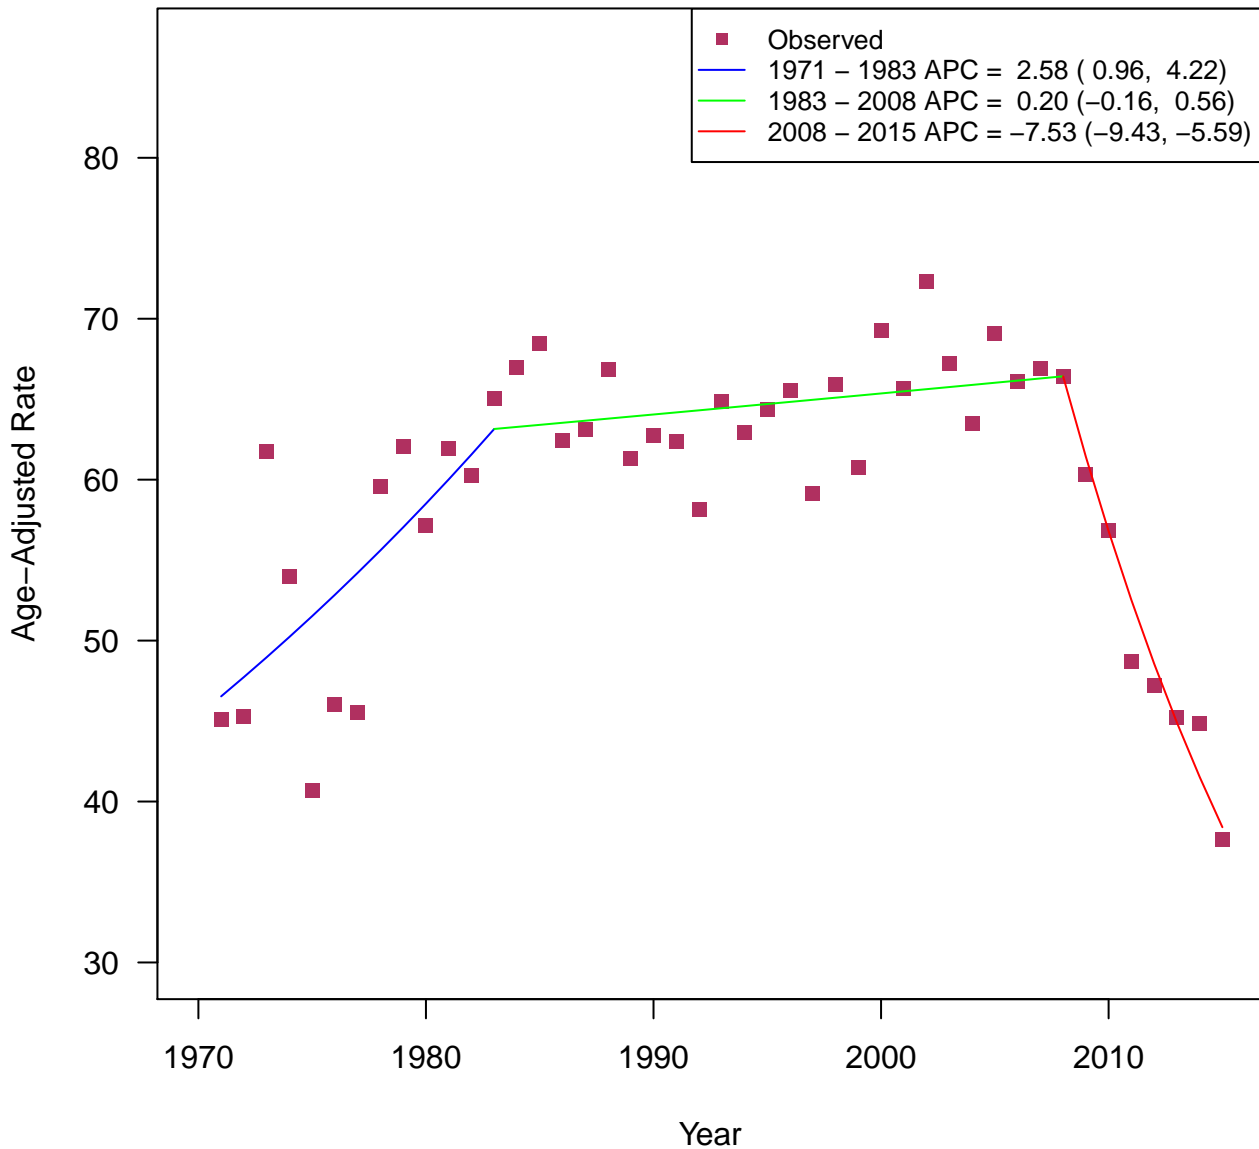

**Figure 304. Age-adjusted incidence rates of pancreatic cancer in males aged 20–29 years in Canada, 1971–2015**

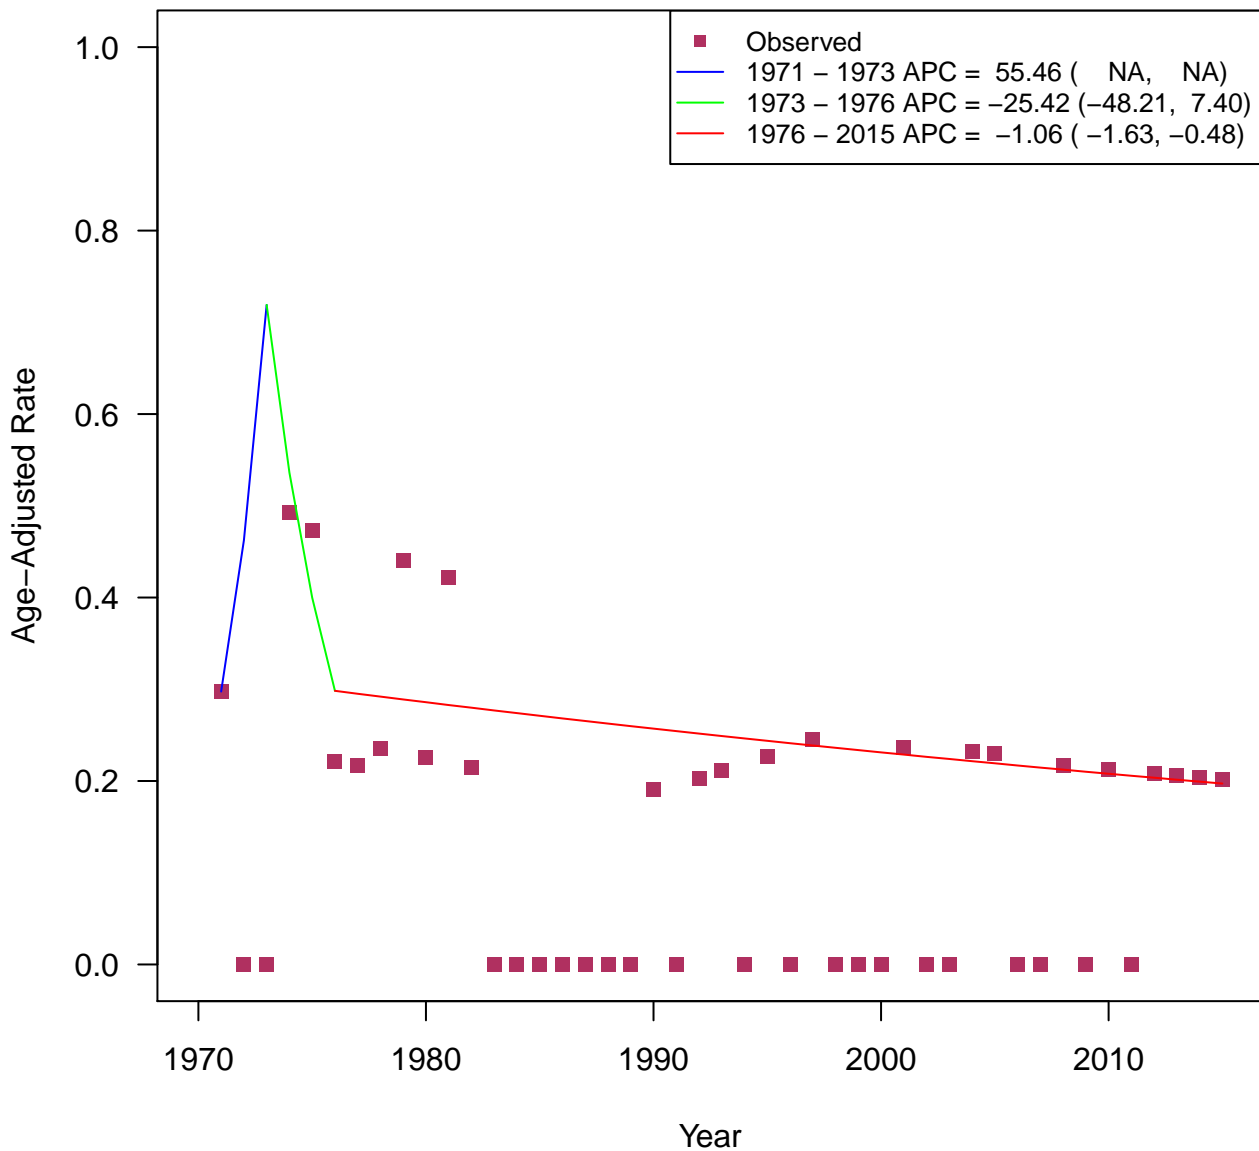

**Figure 305. Age-adjusted incidence rates of pancreatic cancer in males aged 20–39 years in Canada, 1971–2015**

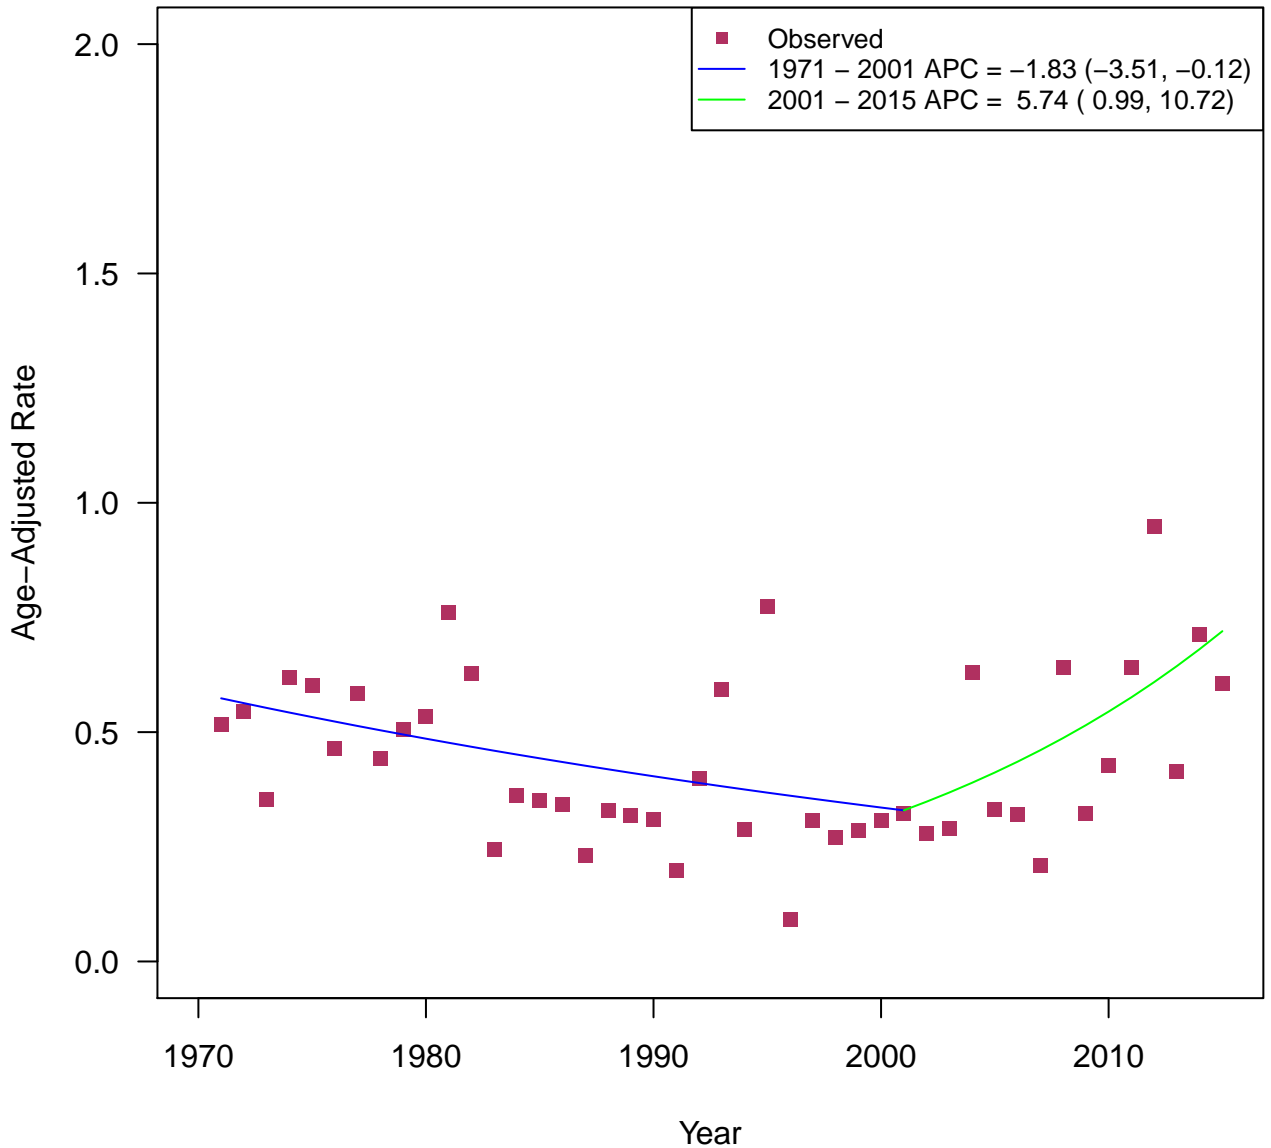

**Figure 306. Age-adjusted incidence rates of pancreatic cancer in males aged 20–49 years in Canada, 1971–2015**

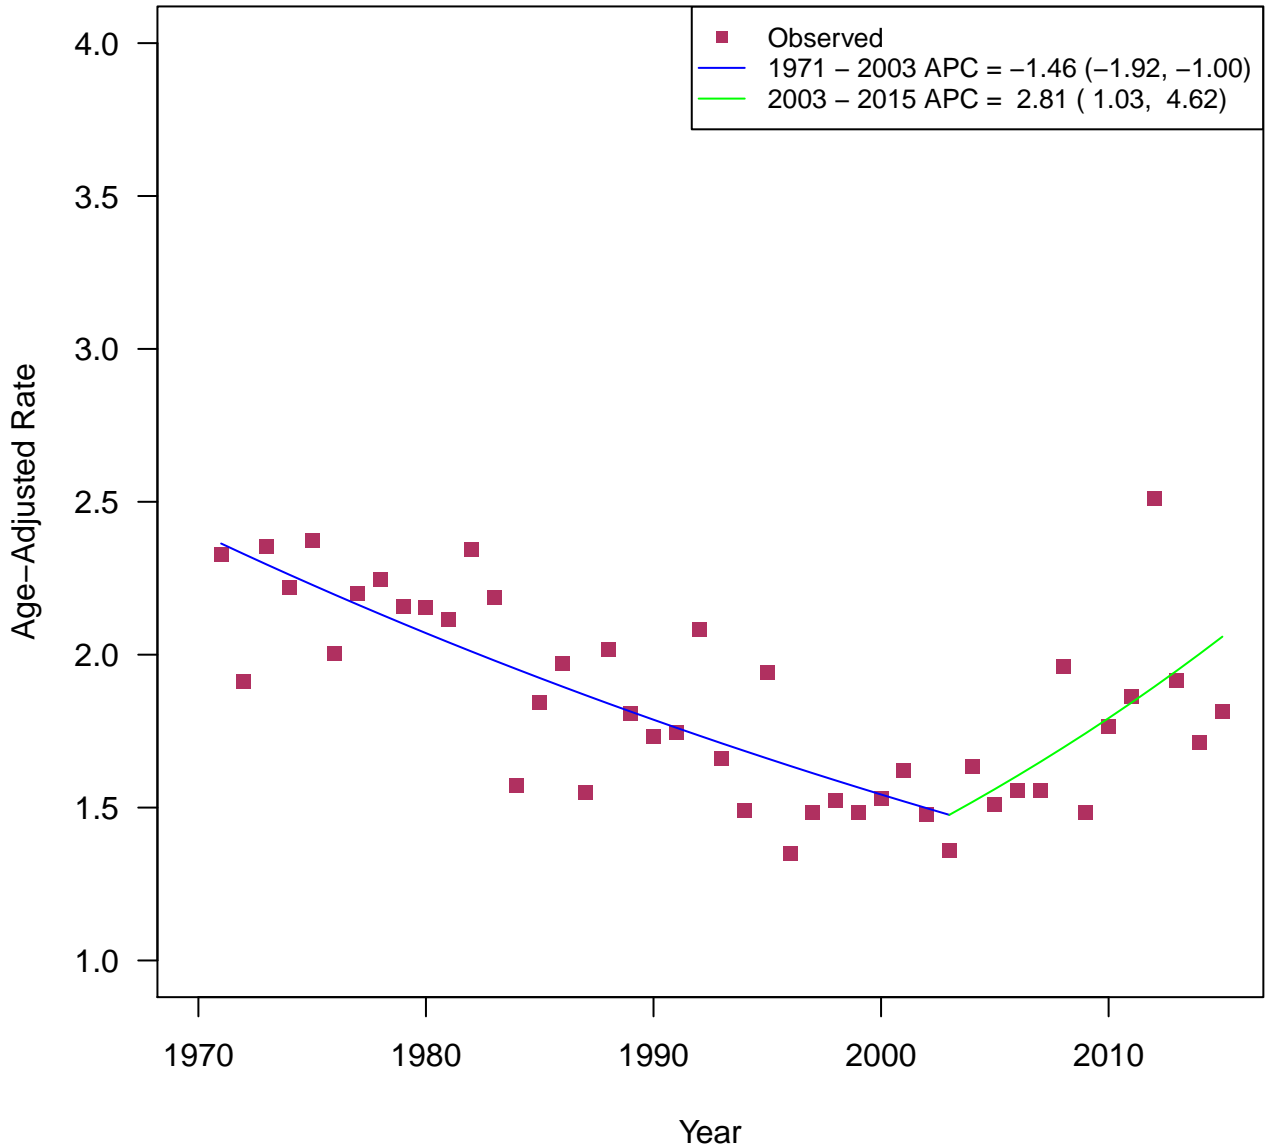

**Figure 307. Age-adjusted incidence rates of pancreatic cancer in males aged 30–39 years in Canada, 1971–2015**

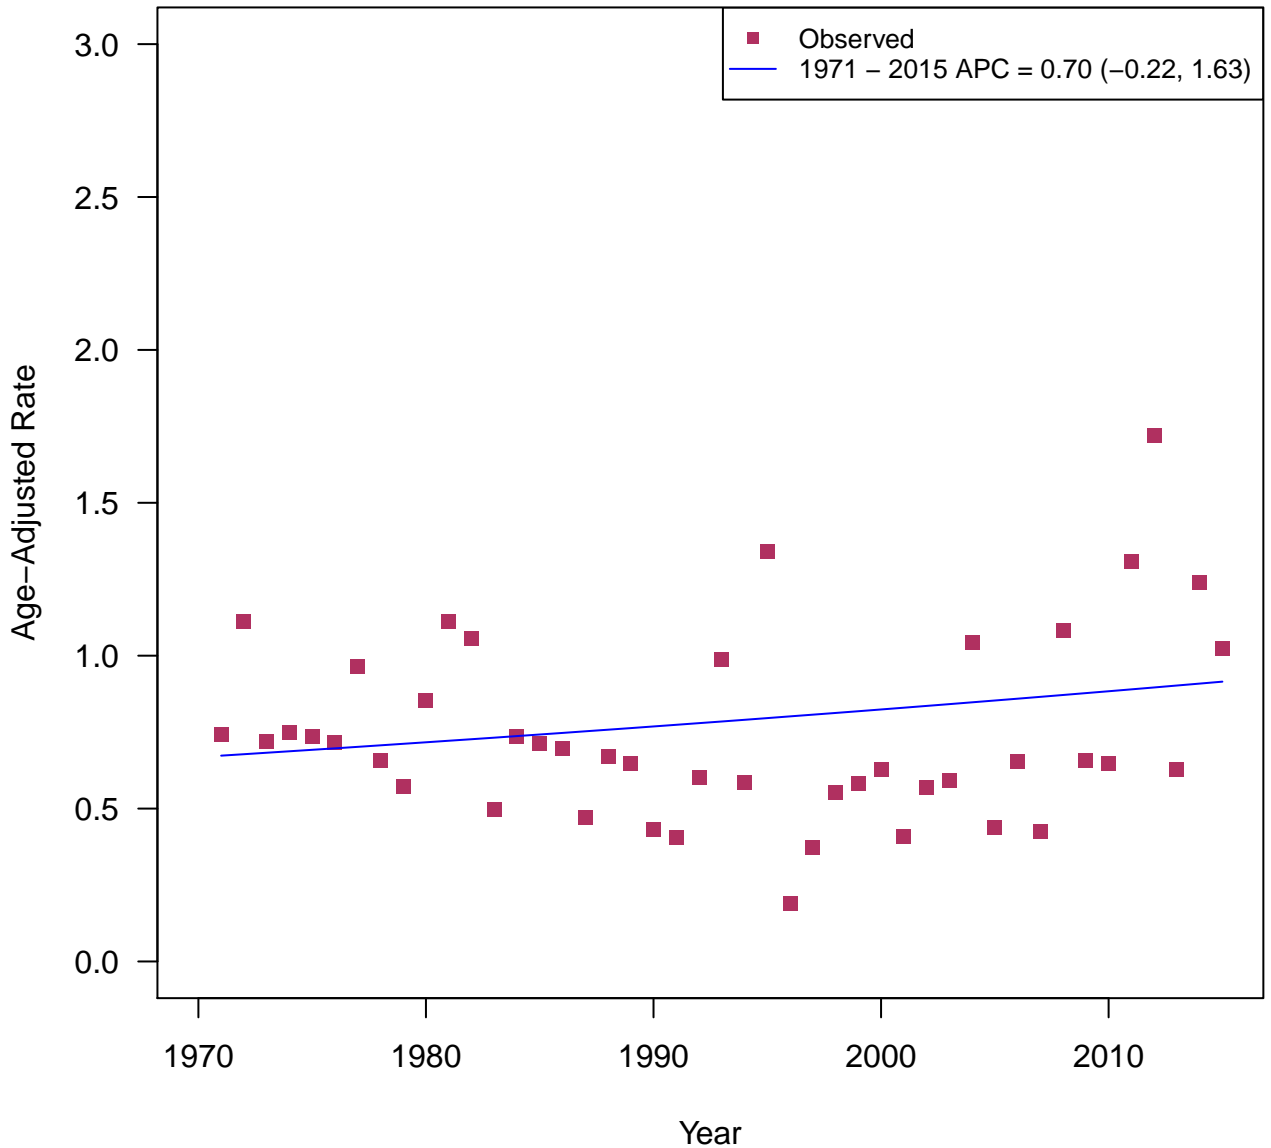



**Figure 308. Age-adjusted incidence rates of pancreatic cancer in males aged 40–49 years in Canada, 1971–2015**

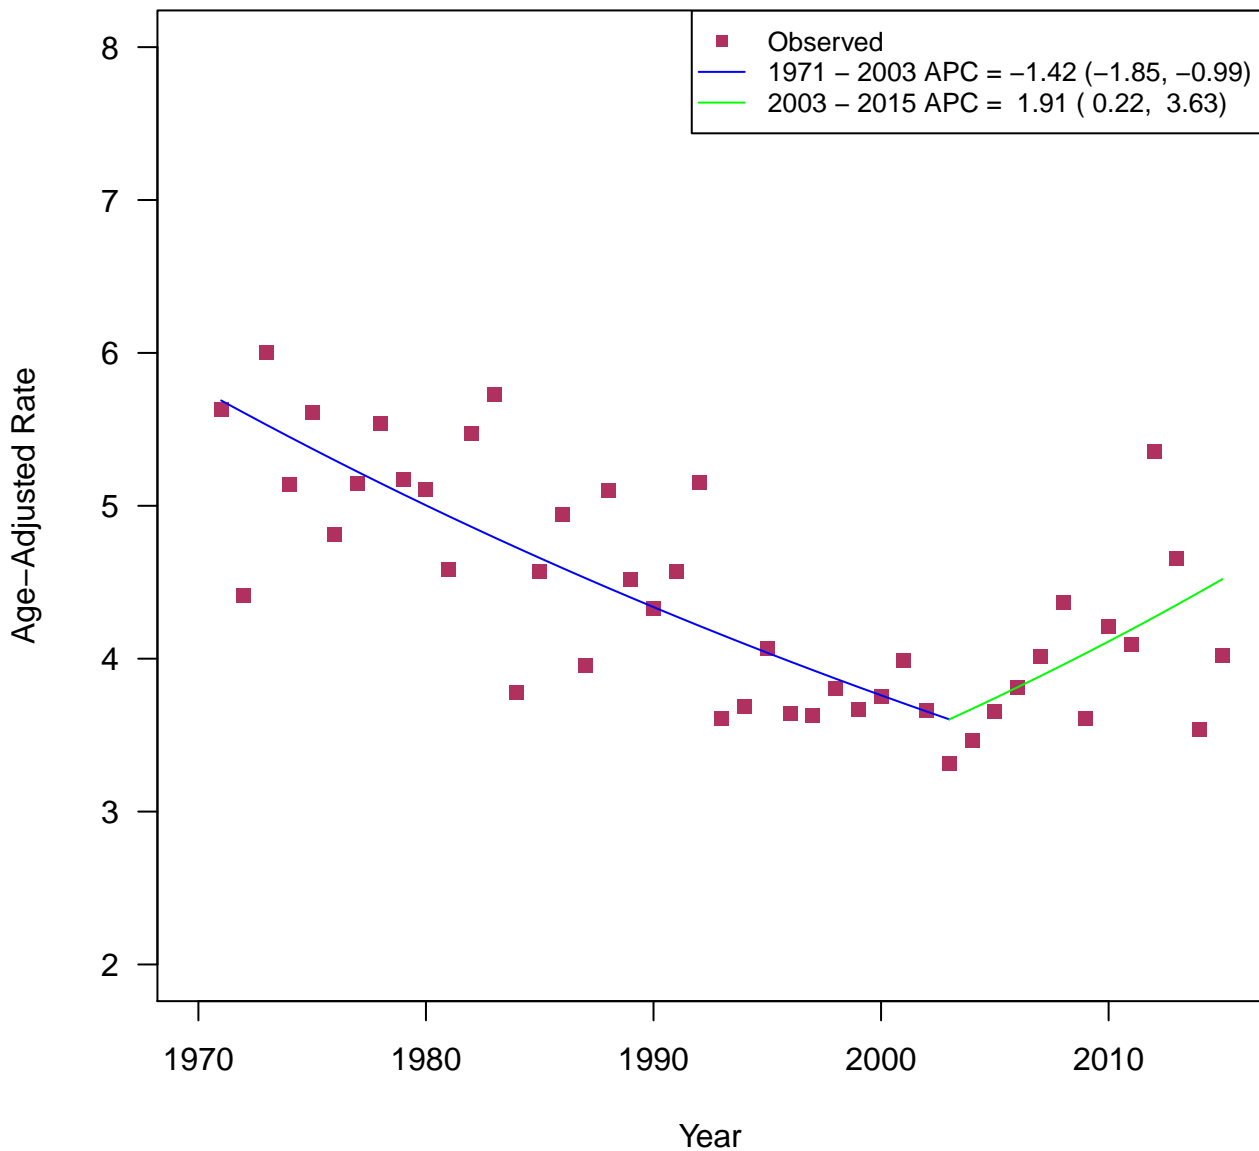

**Figure 309. Age-adjusted incidence rates of pancreatic cancer in males aged 50–59 years in Canada, 1971–2015**

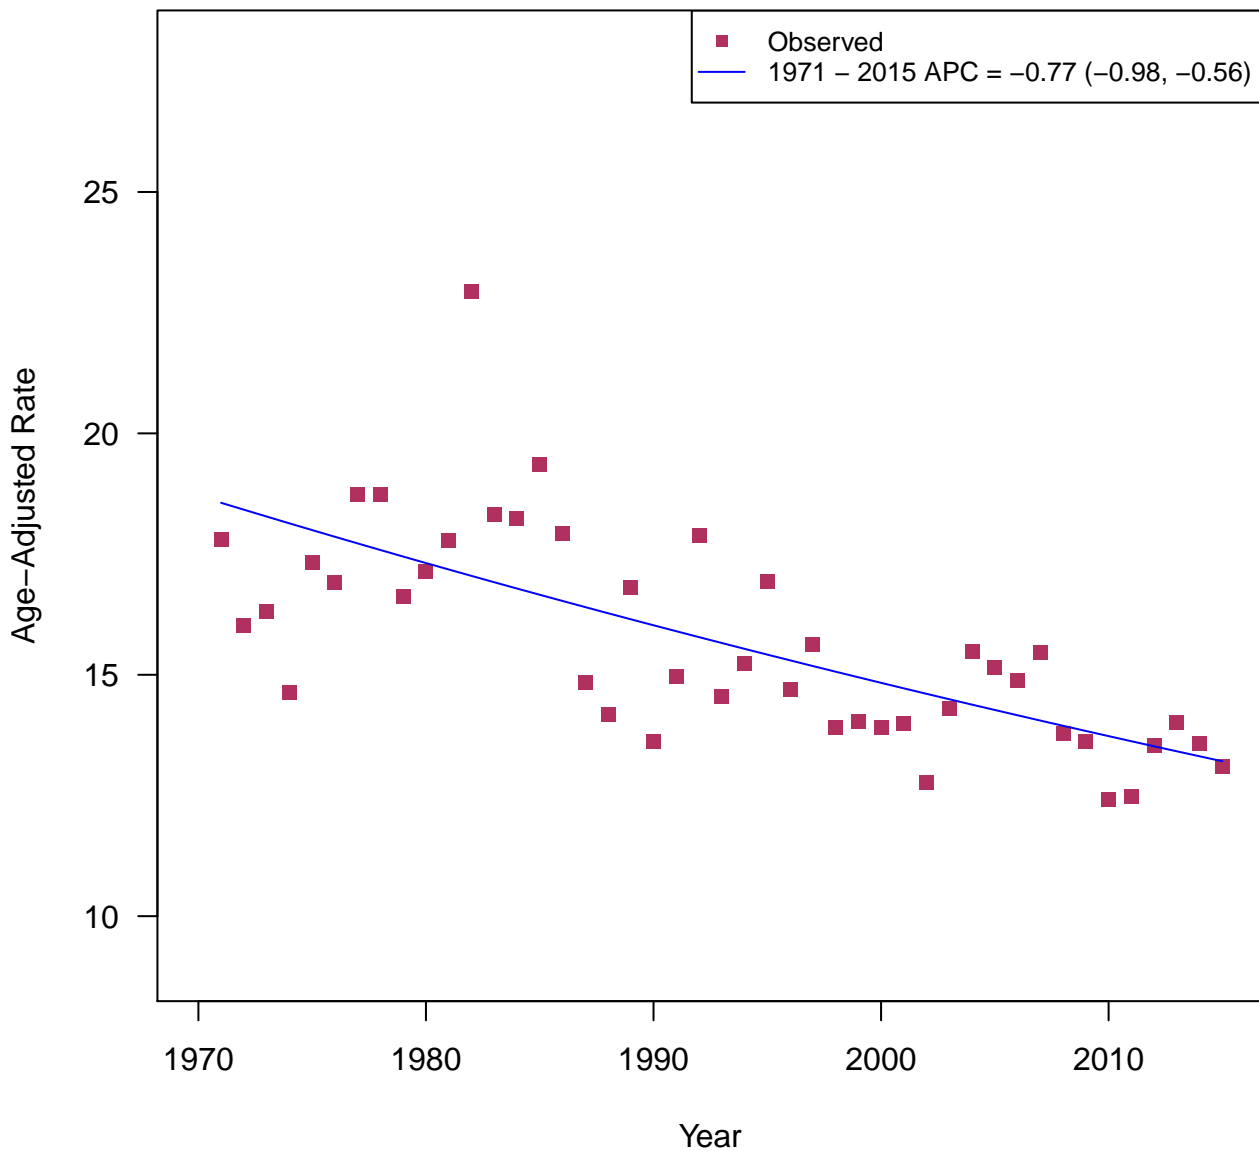

**Figure 310. Age-adjusted incidence rates of pancreatic cancer in males aged 60–69 years in Canada, 1971–2015**

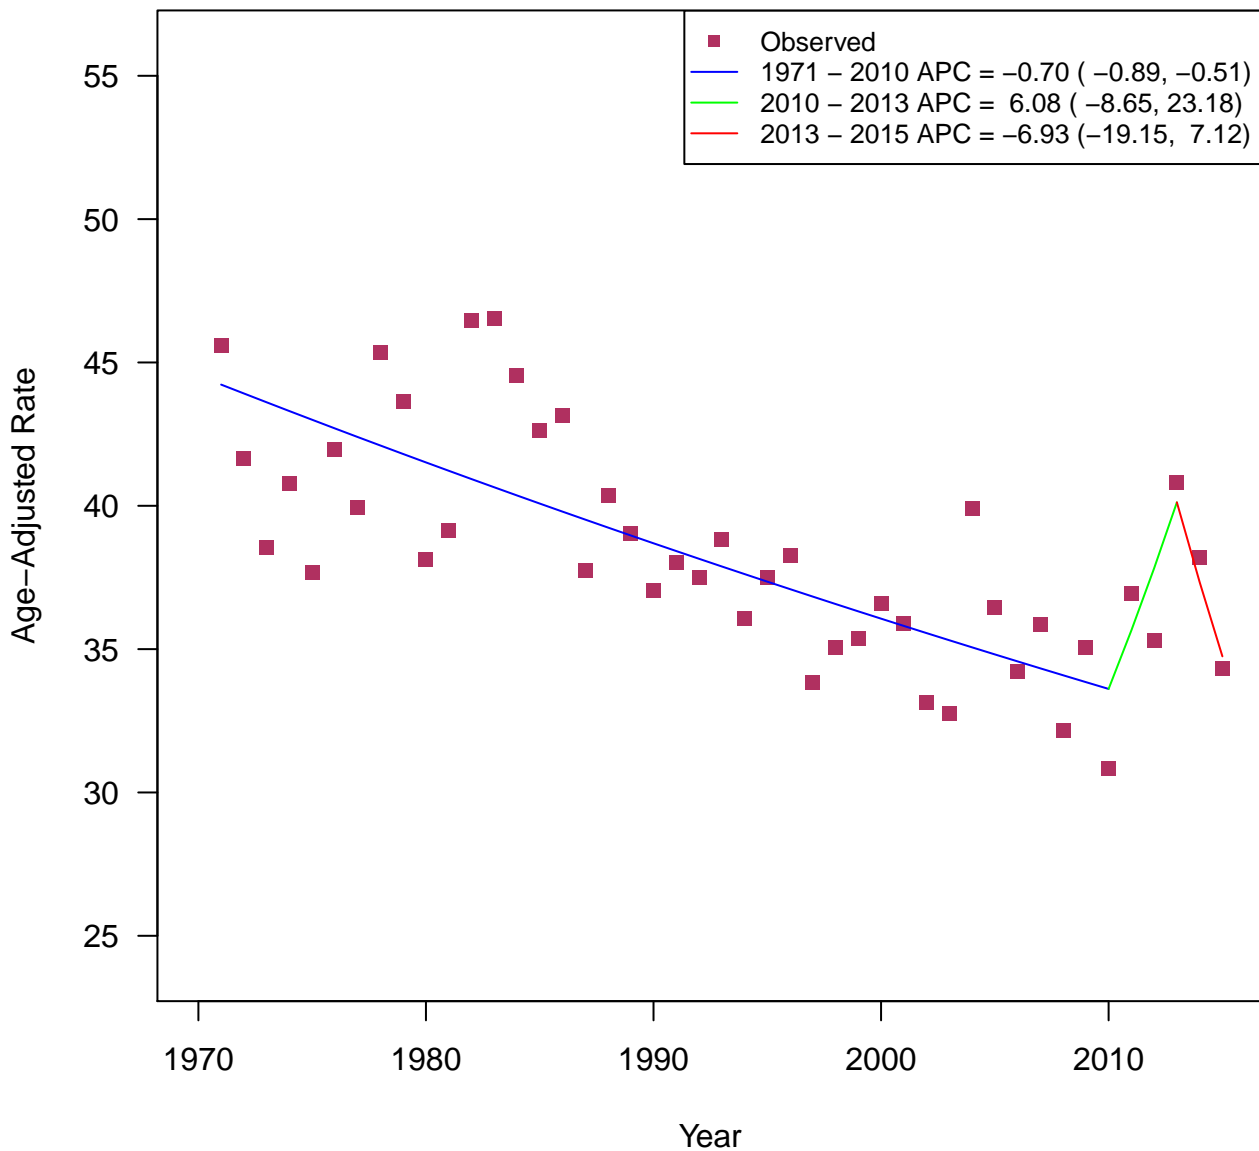

**Figure 311. Age-adjusted incidence rates of pancreatic cancer in males aged 70–79 years in Canada, 1971–2015**

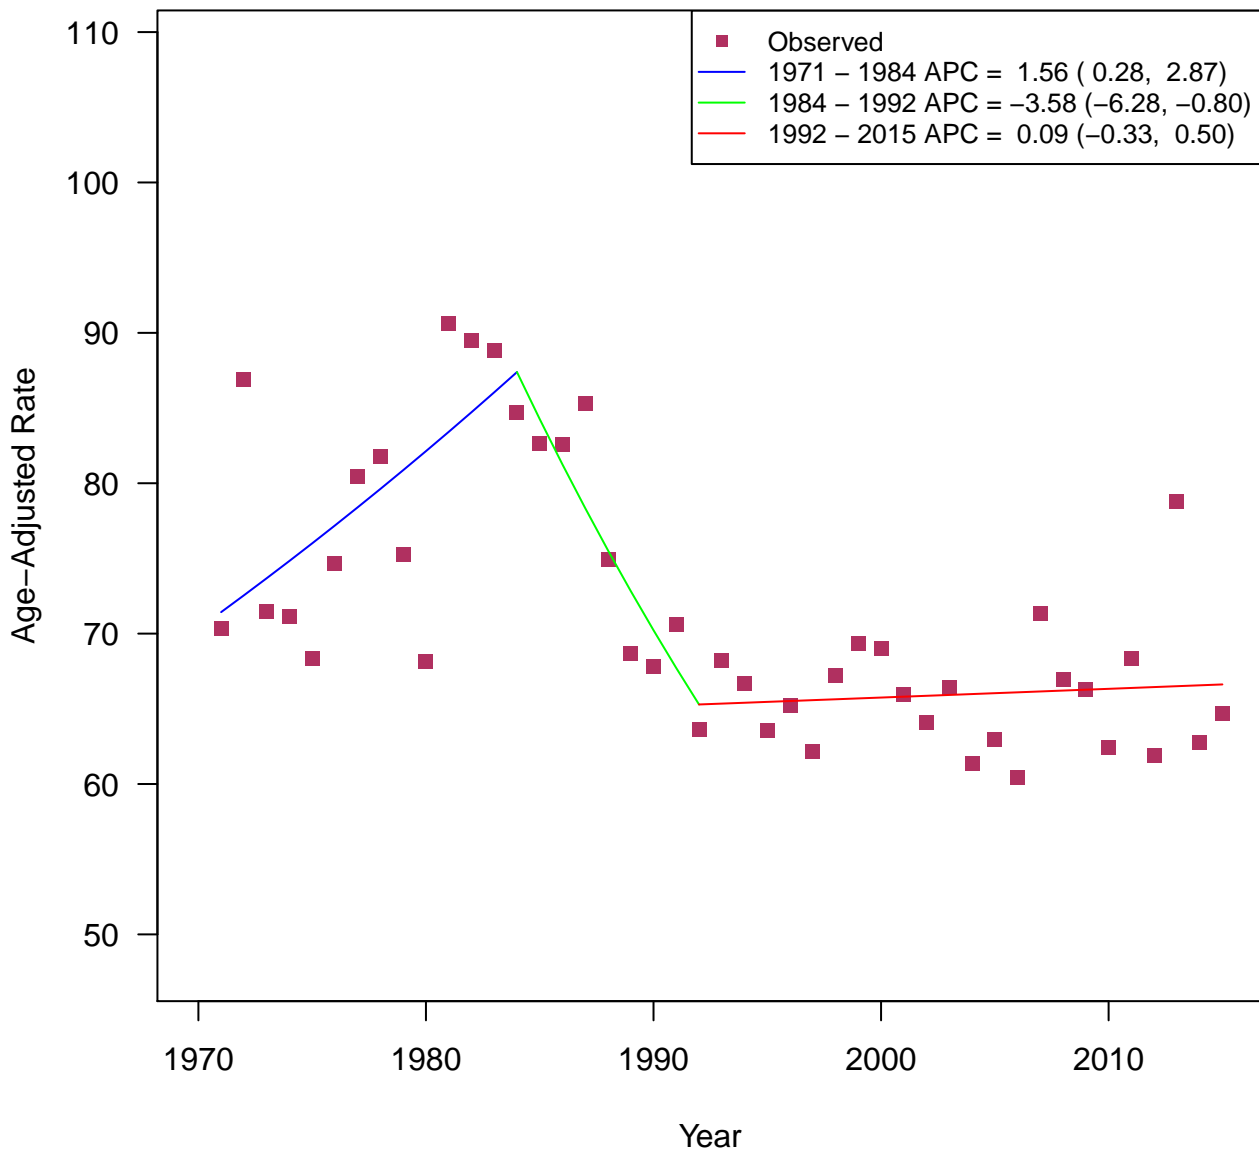

**Figure 312. Age-adjusted incidence rates of pancreatic cancer in males aged 80–89 years in Canada, 1971–2015**

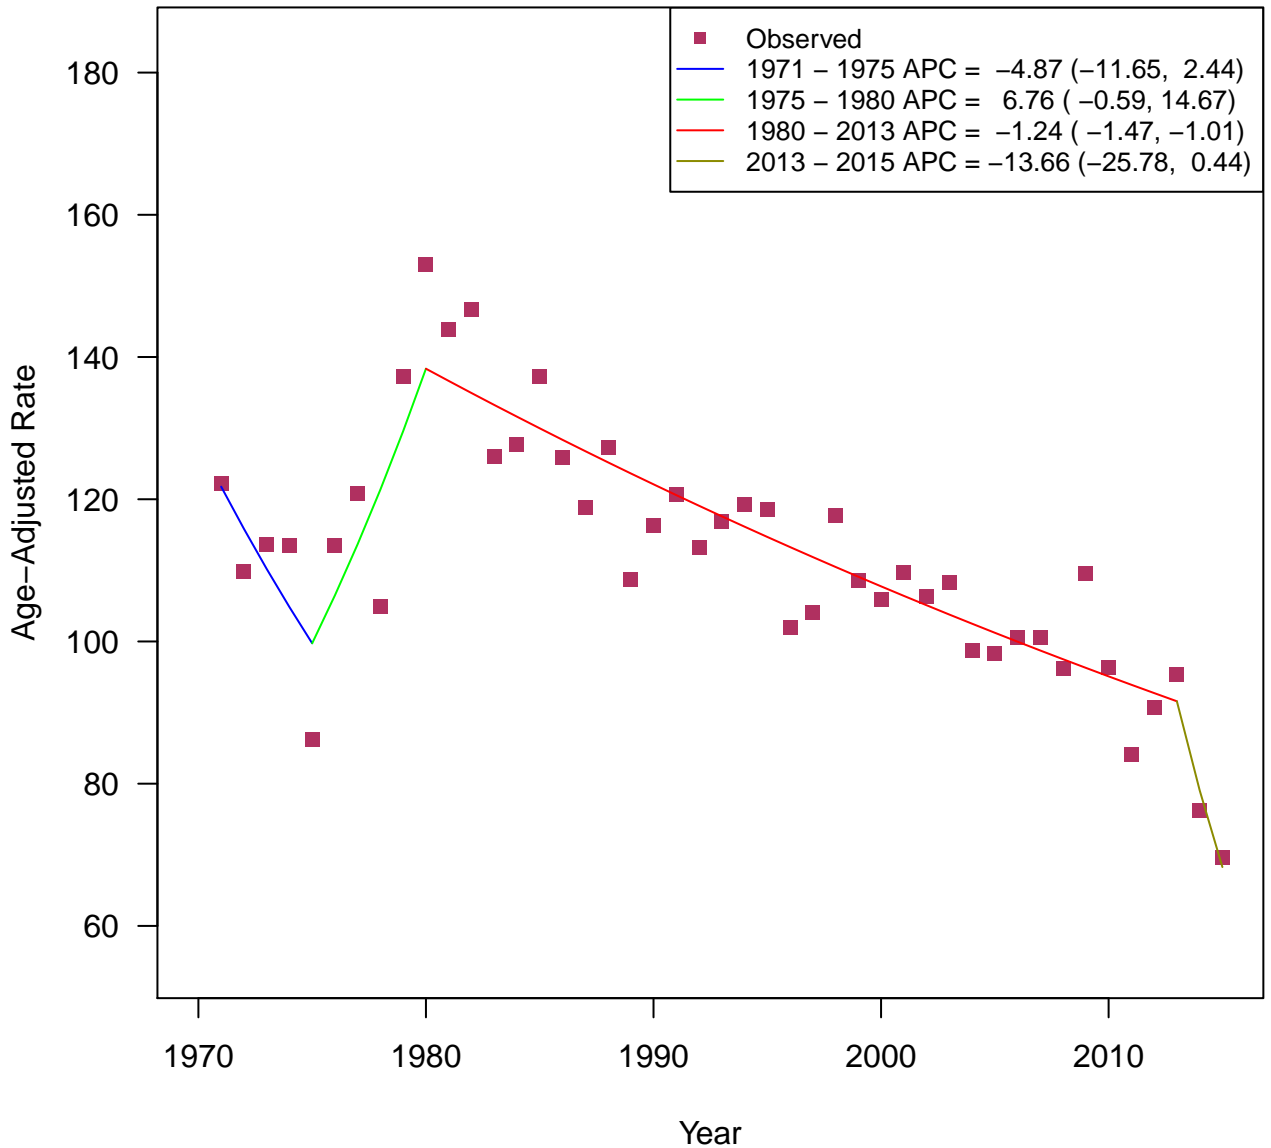

**Figure 313. Age-adjusted incidence rates of pancreatic cancer in females aged 20–29 years in Canada, 1971–2015**

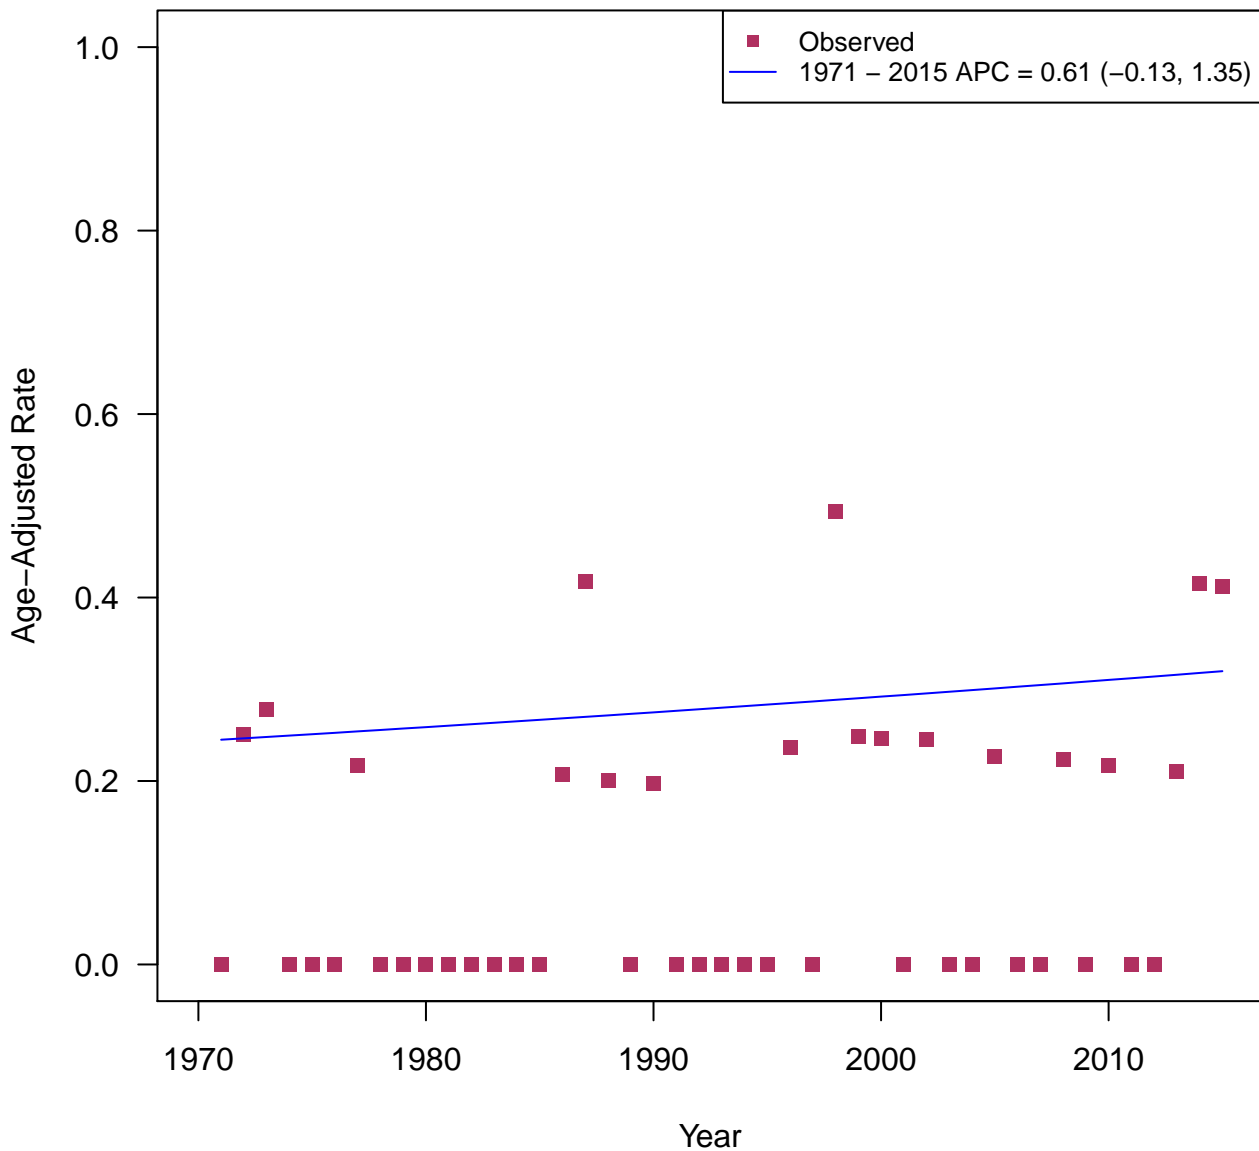

**Figure 314. Age-adjusted incidence rates of pancreatic cancer in females aged 20–39 years in Canada, 1971–2015**

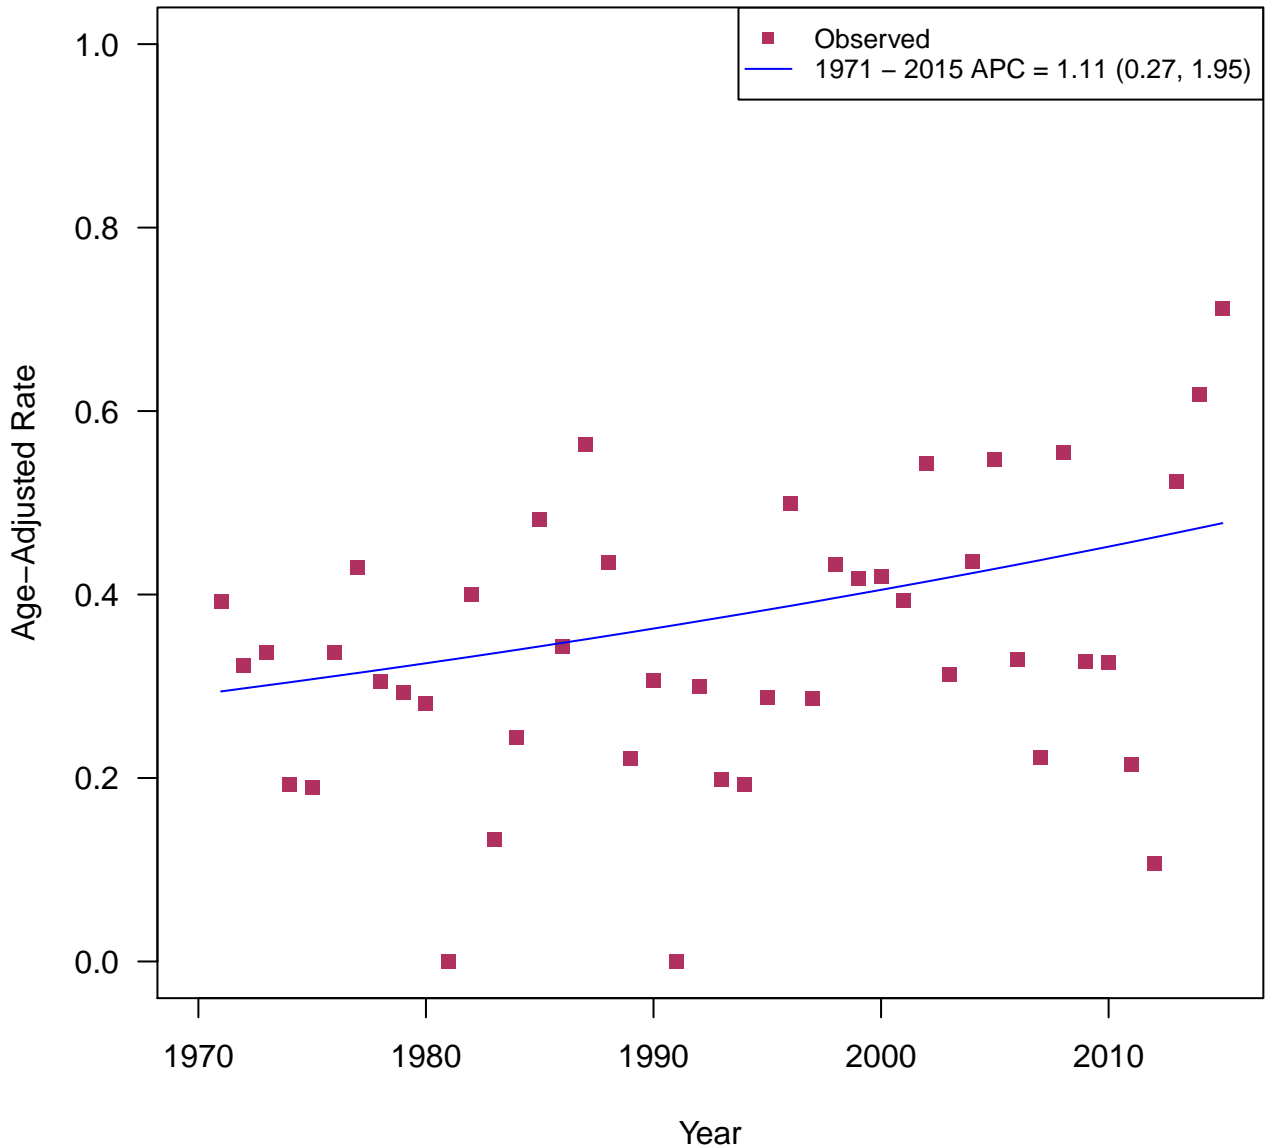

**Figure 315. Age-adjusted incidence rates of pancreatic cancer in females aged 30–39 years in Canada, 1971–2015**

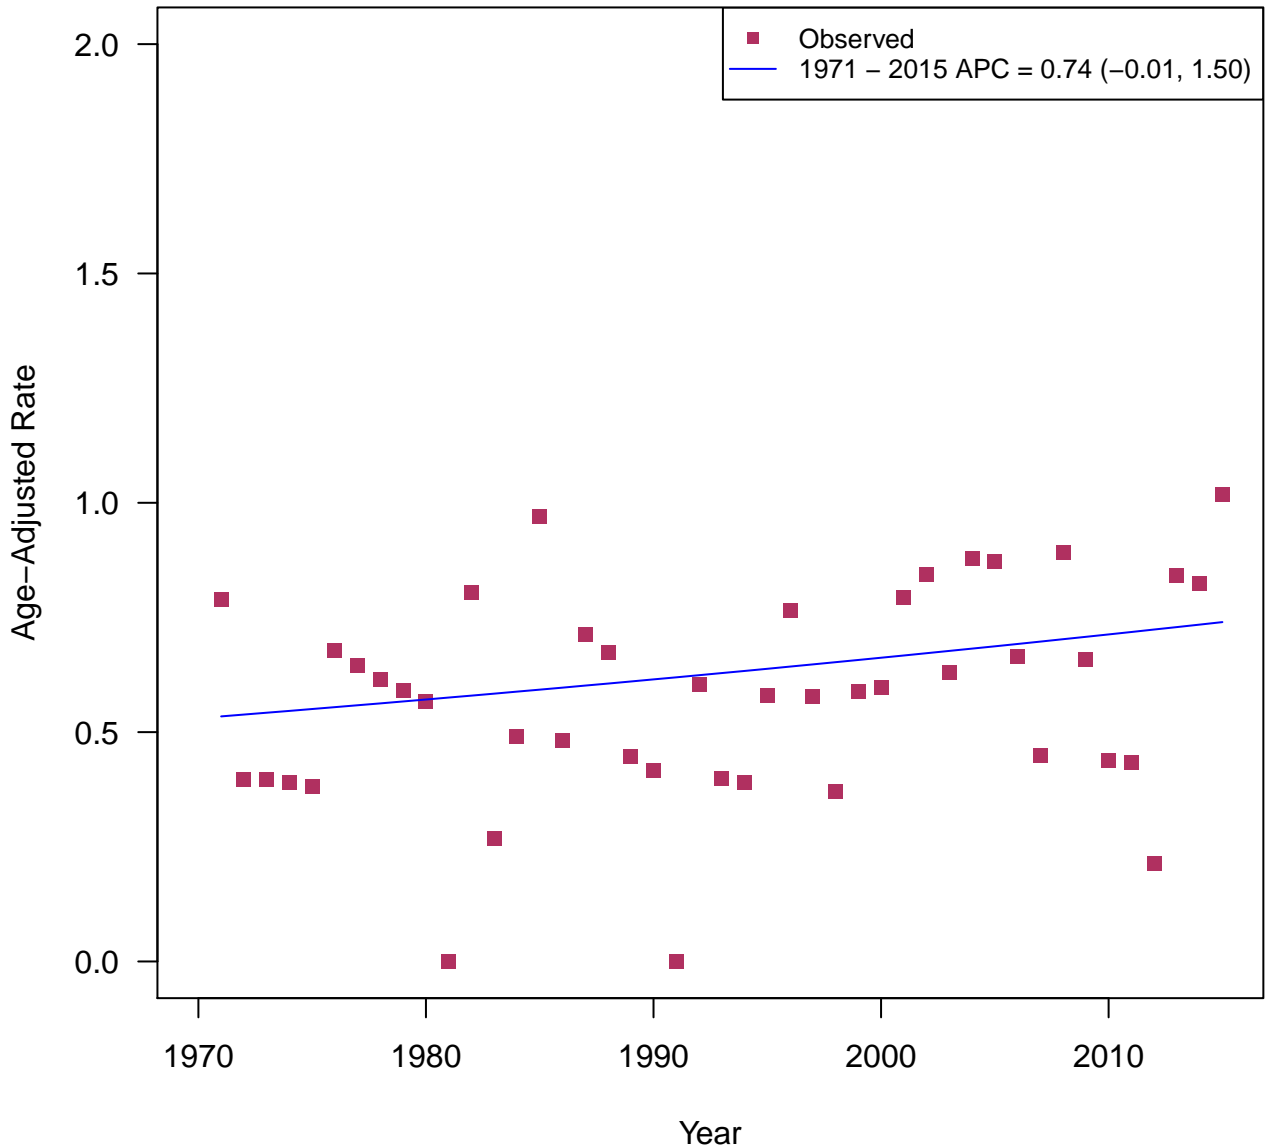



**Figure 316. Age-adjusted incidence rates of pancreatic cancer in females aged 40–49 years in Canada, 1971–2015**

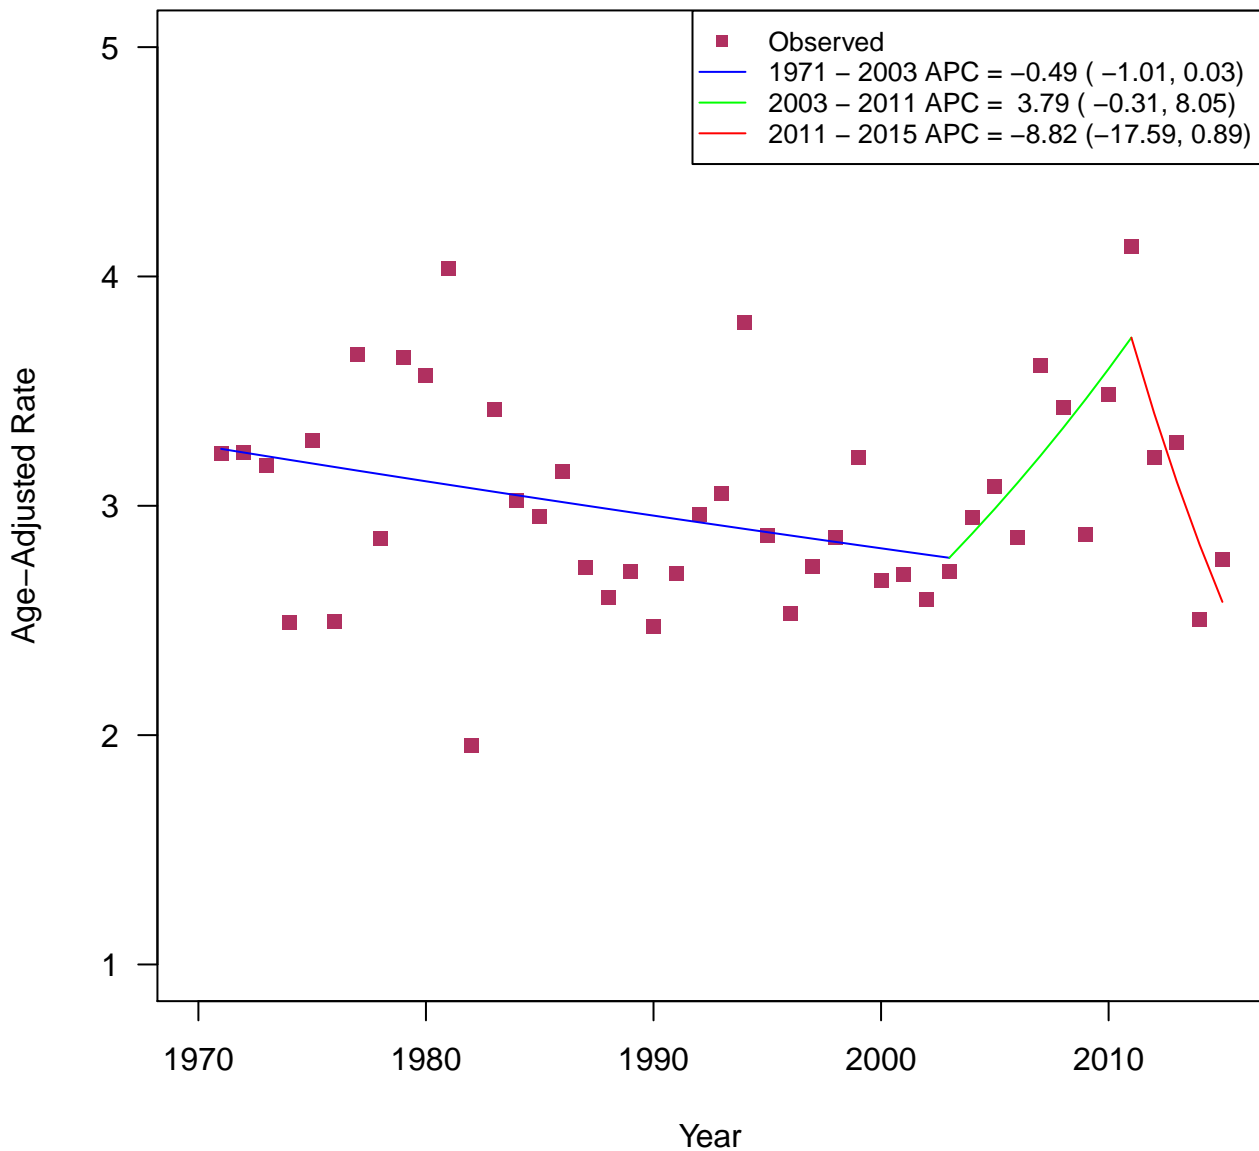

**Figure 317. Age-adjusted incidence rates of pancreatic cancer in females aged 50–59 years in Canada, 1971–2015**

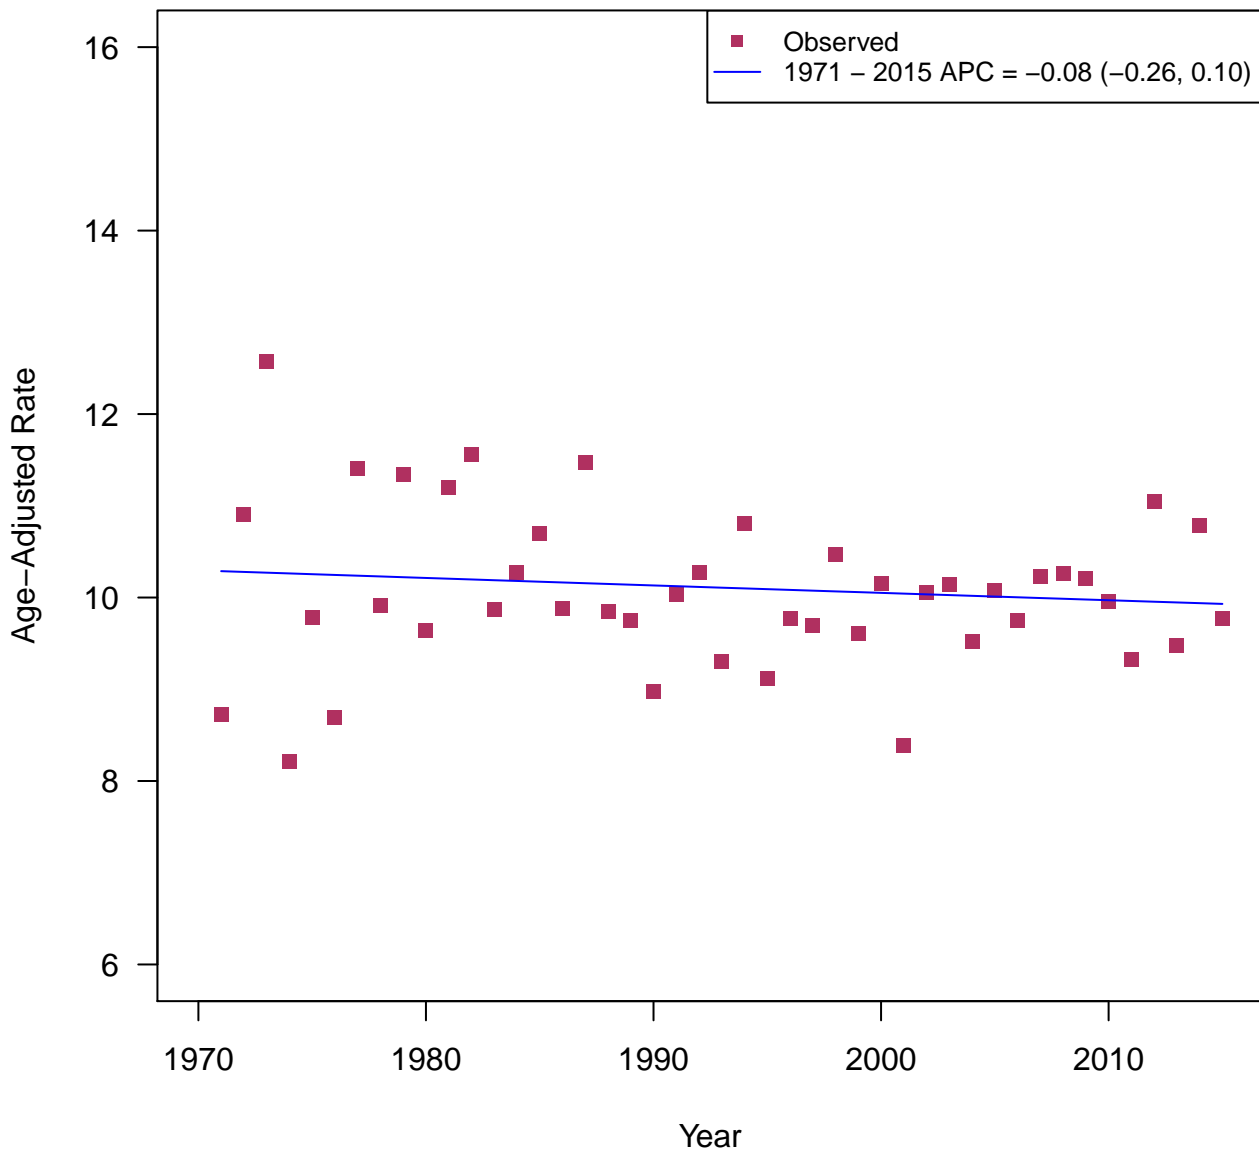

**Figure 318. Age-adjusted incidence rates of pancreatic cancer in females aged 60–69 years in Canada, 1971–2015**

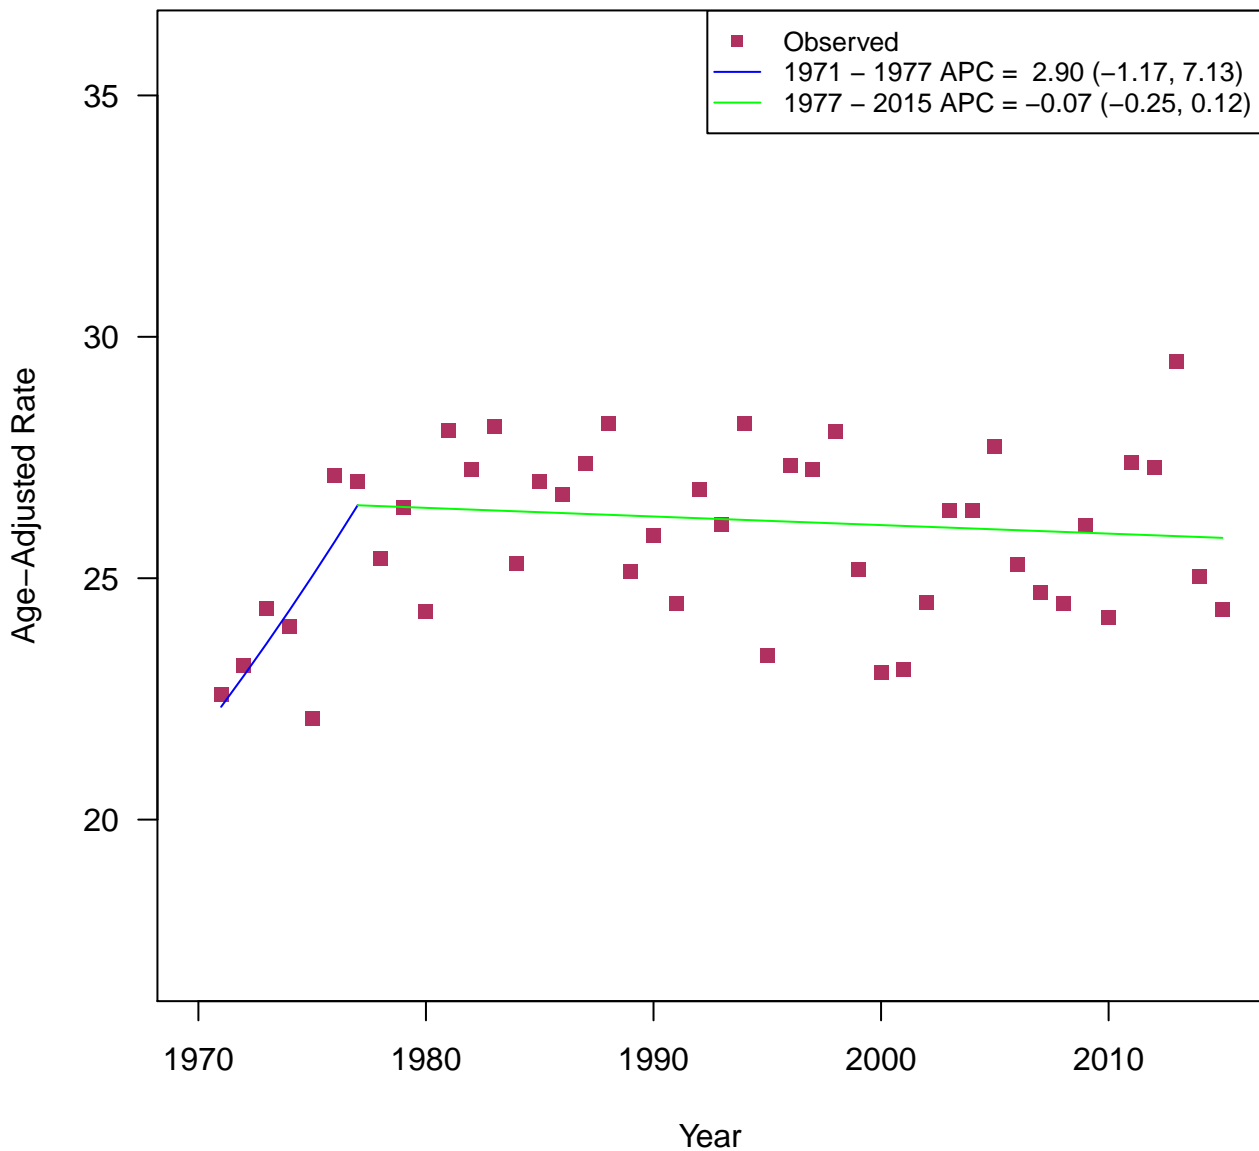

**Figure 319. Age-adjusted incidence rates of pancreatic cancer in females aged 70–79 years in Canada, 1971–2015**

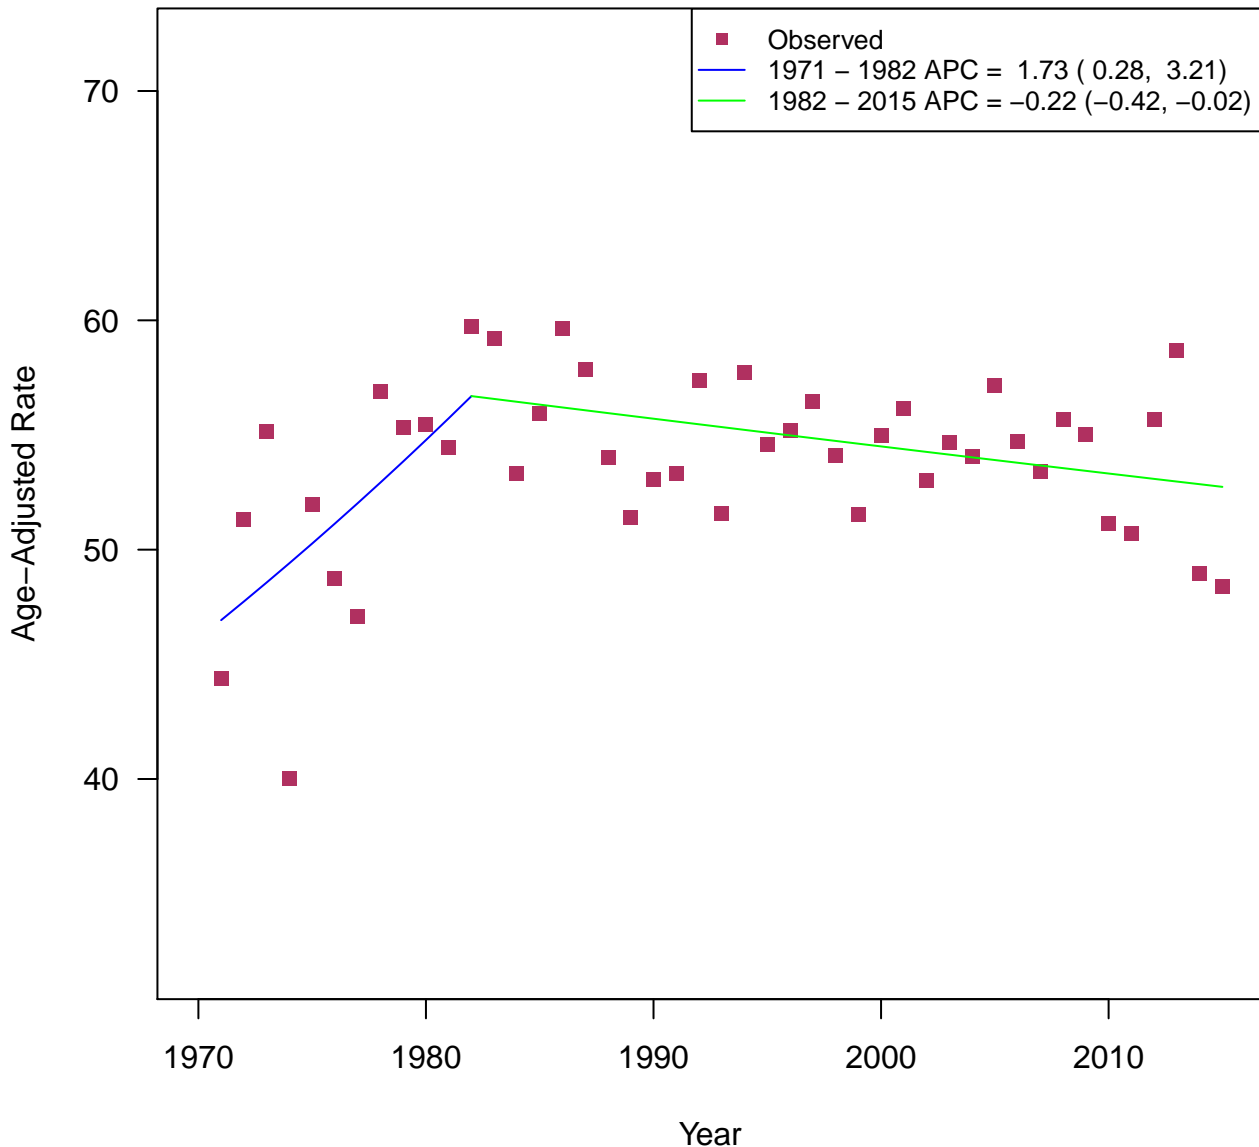

**Figure 320. Age-adjusted incidence rates of pancreatic cancer in females aged 80–89 years in Canada, 1971–2015**

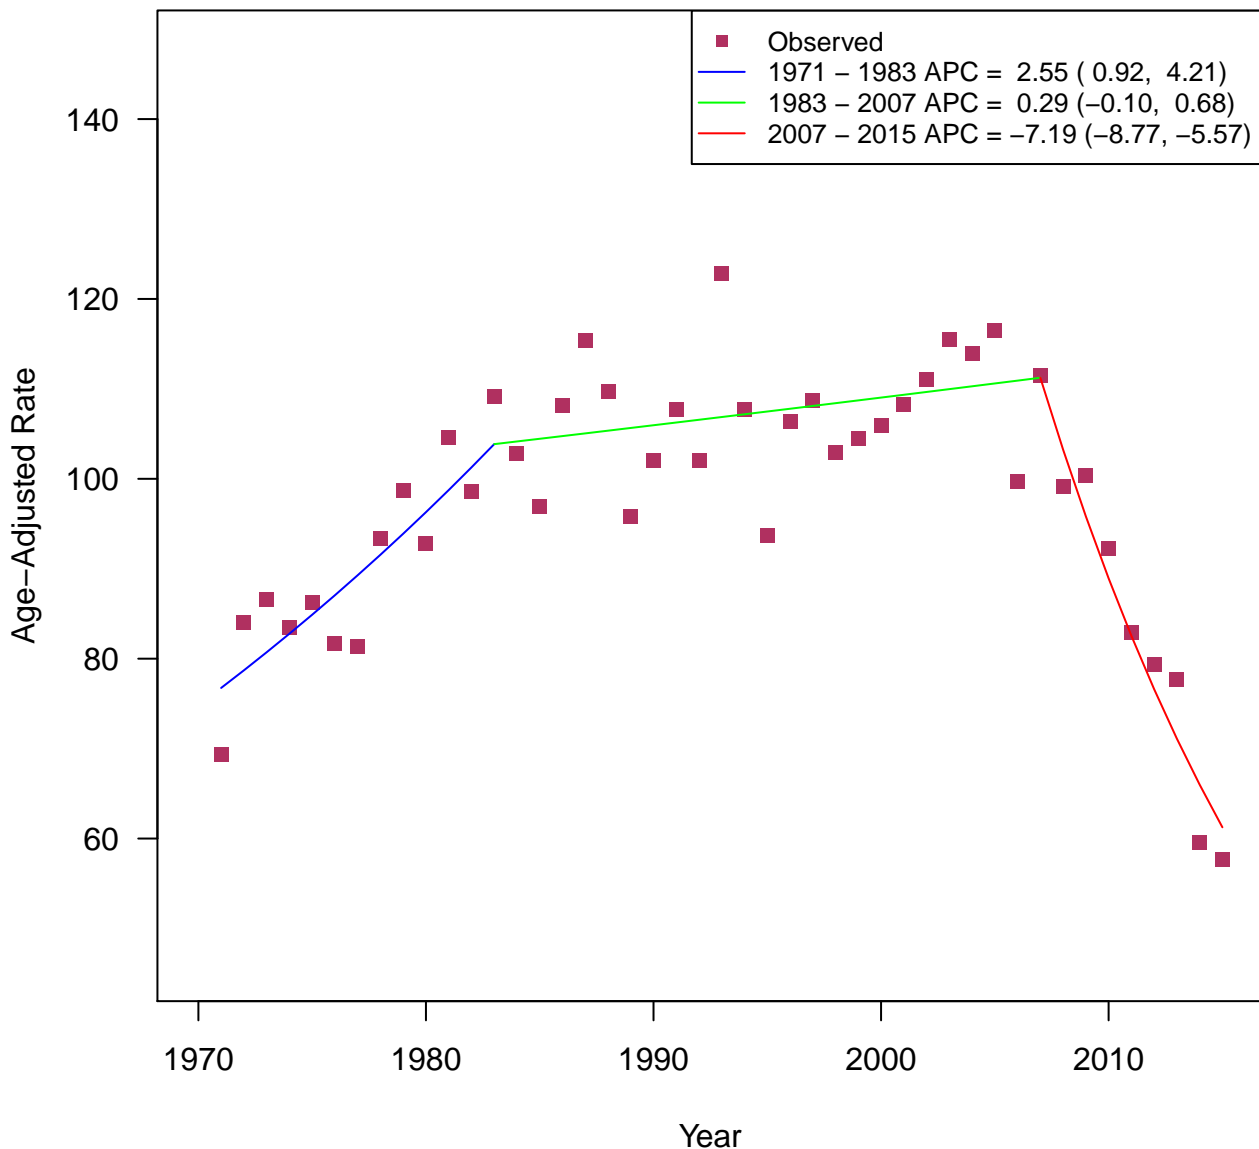

**Figure 321. Age-adjusted incidence rates of prostate cancer in males aged 20–29 years in Canada, 1971–2015**

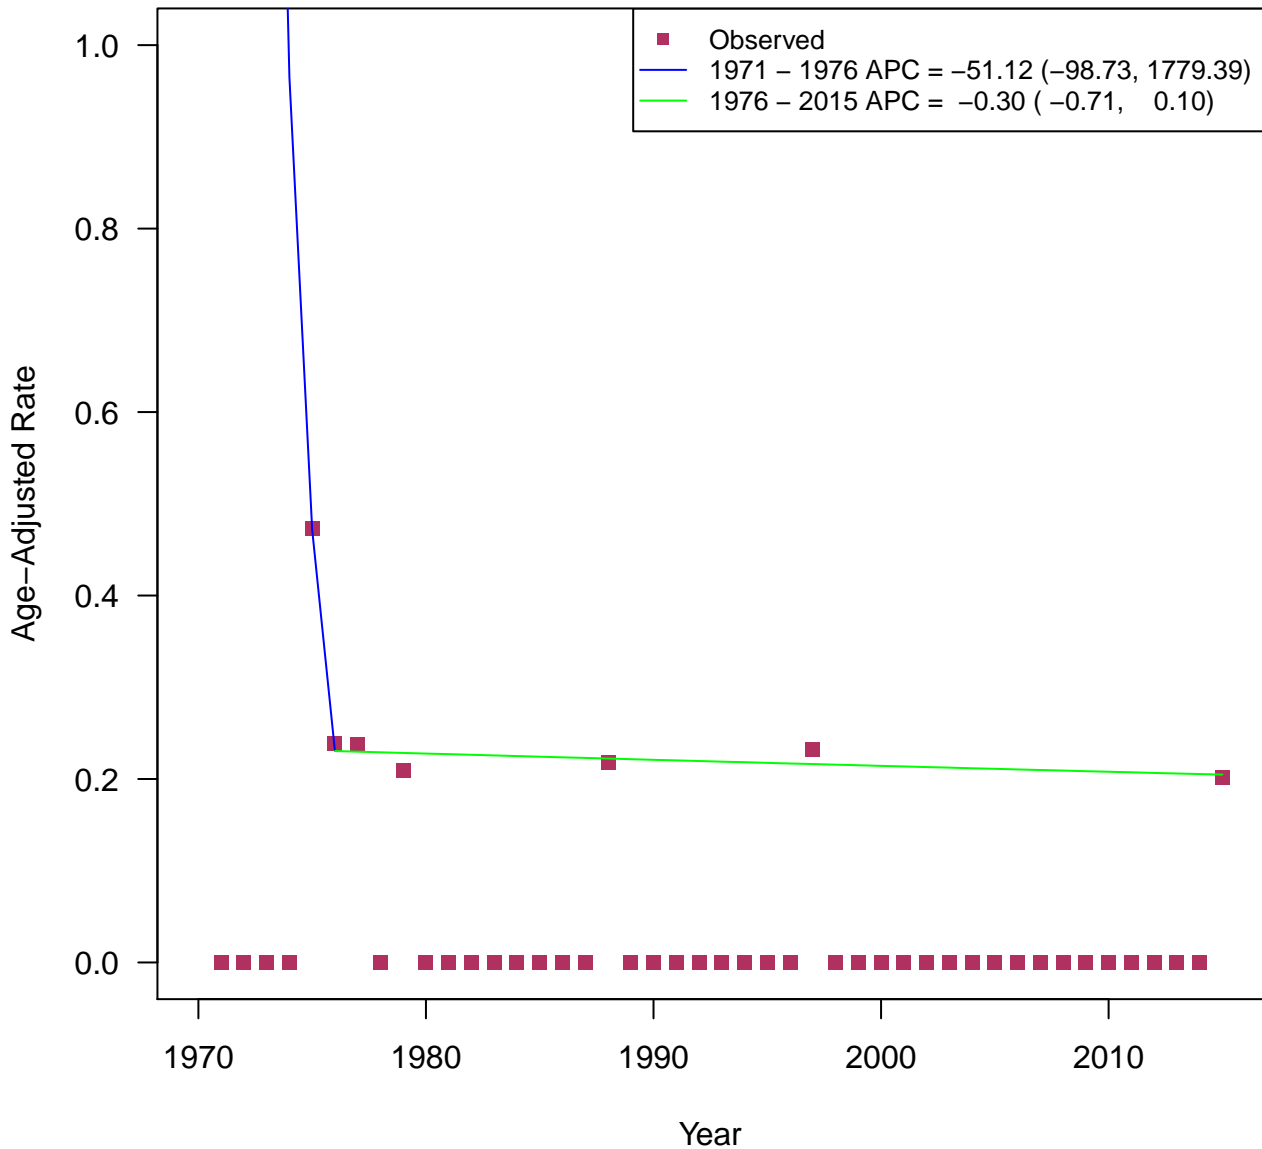

**Figure 322. Age-adjusted incidence rates of prostate cancer in males aged 20–39 years in Canada, 1971–2015**

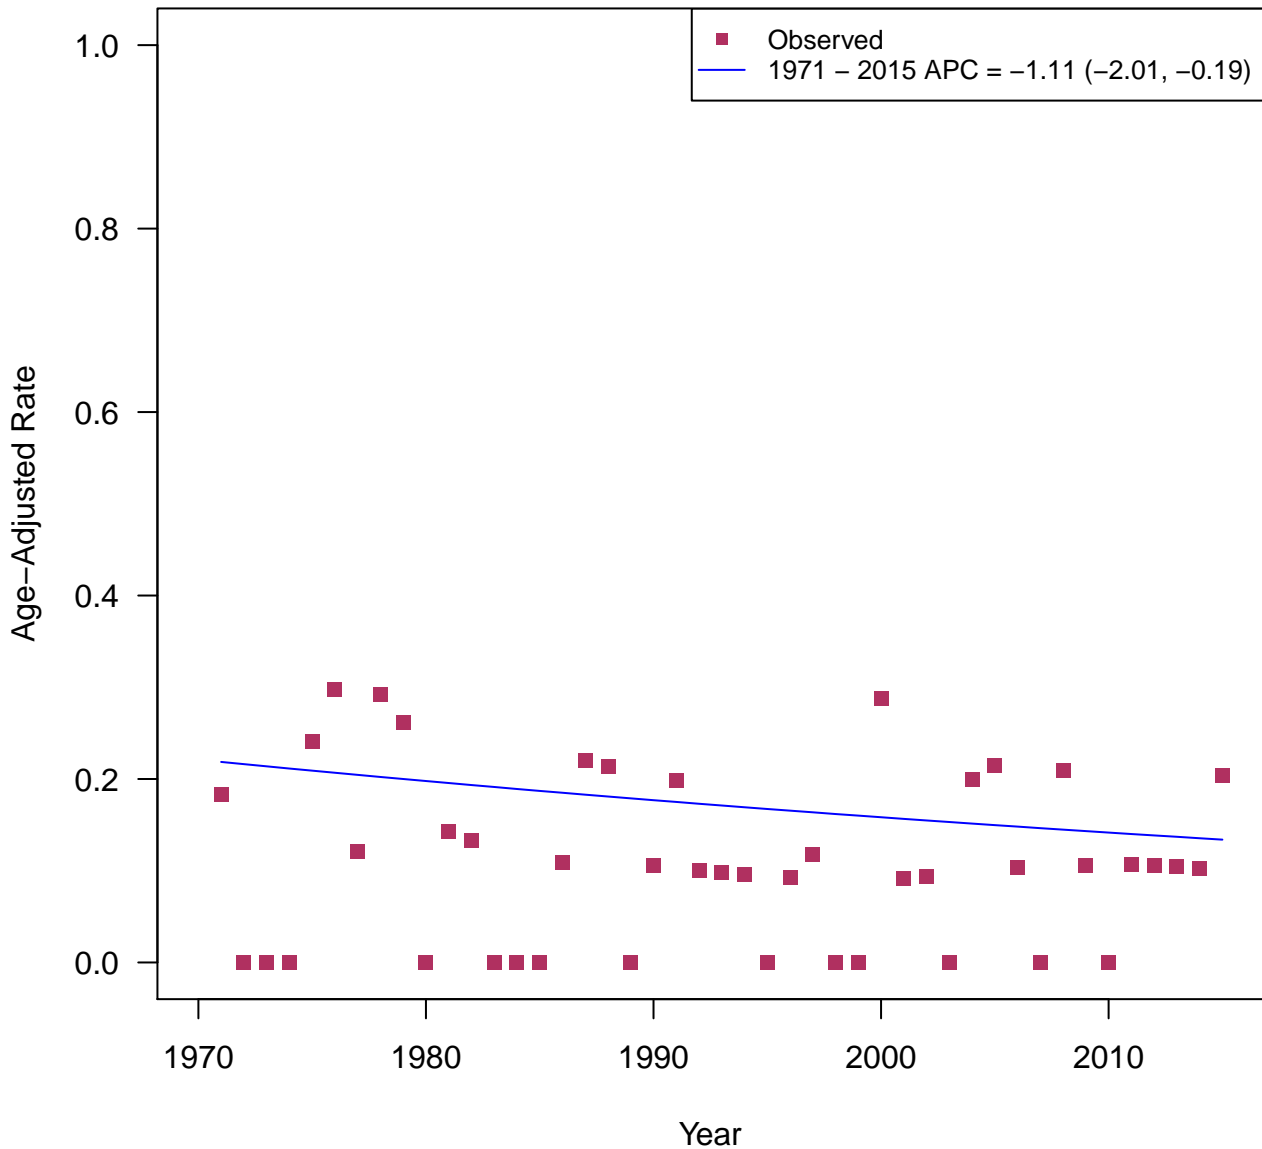

**Figure 323. Age-adjusted incidence rates of prostate cancer in males aged 20–49 years in Canada, 1971–2015**

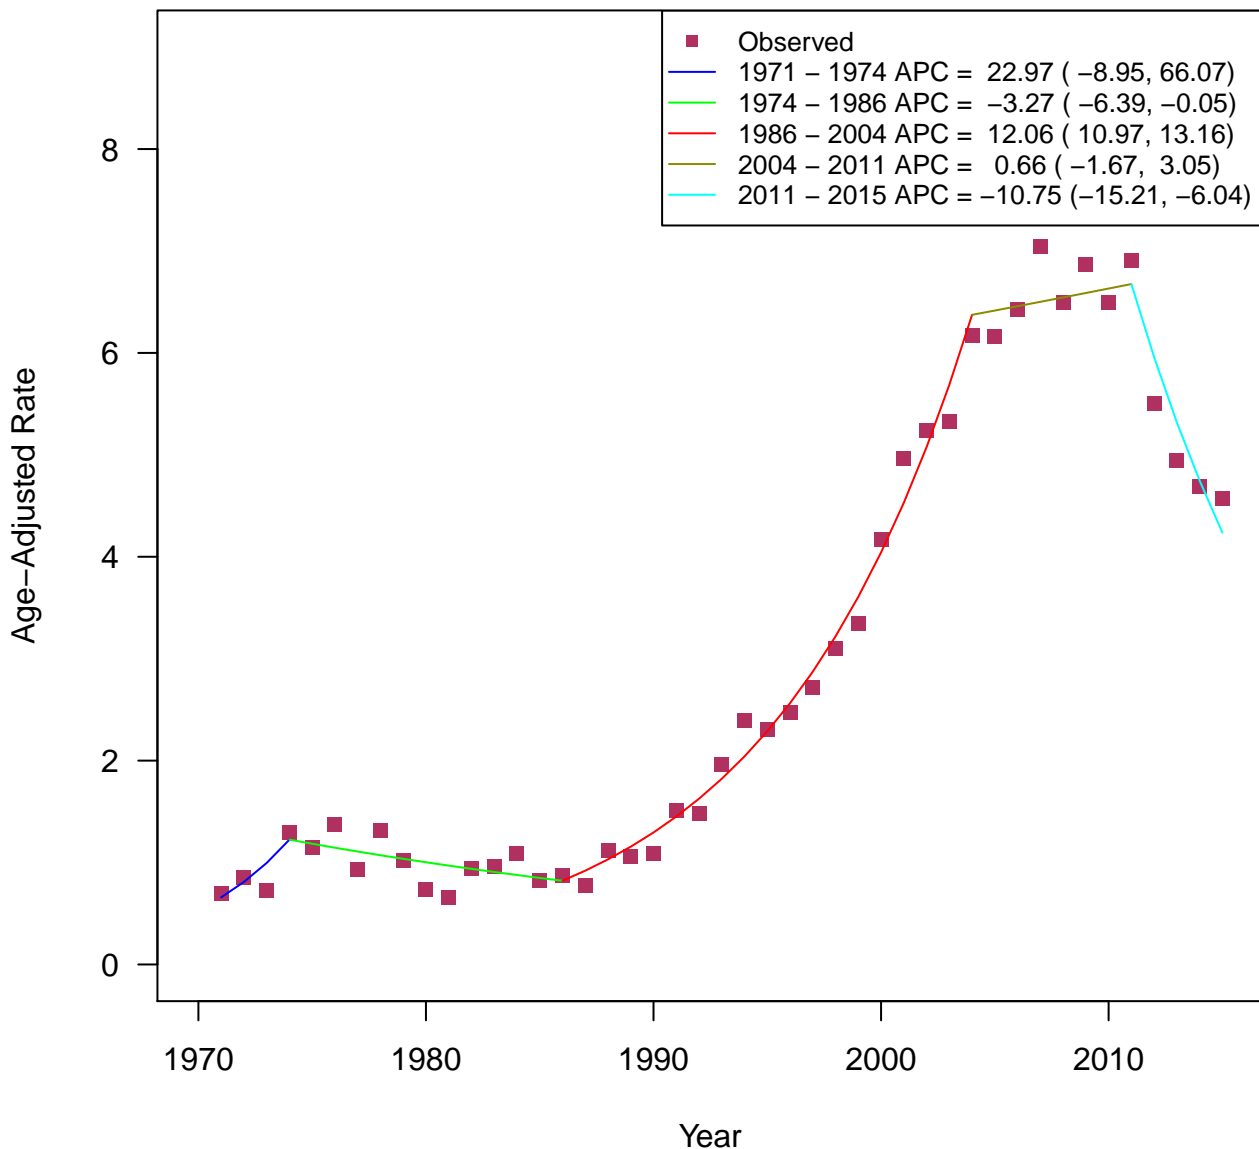



**Figure 324. Age-adjusted incidence rates of prostate cancer in males aged 30–39 years in Canada, 1971–2015**

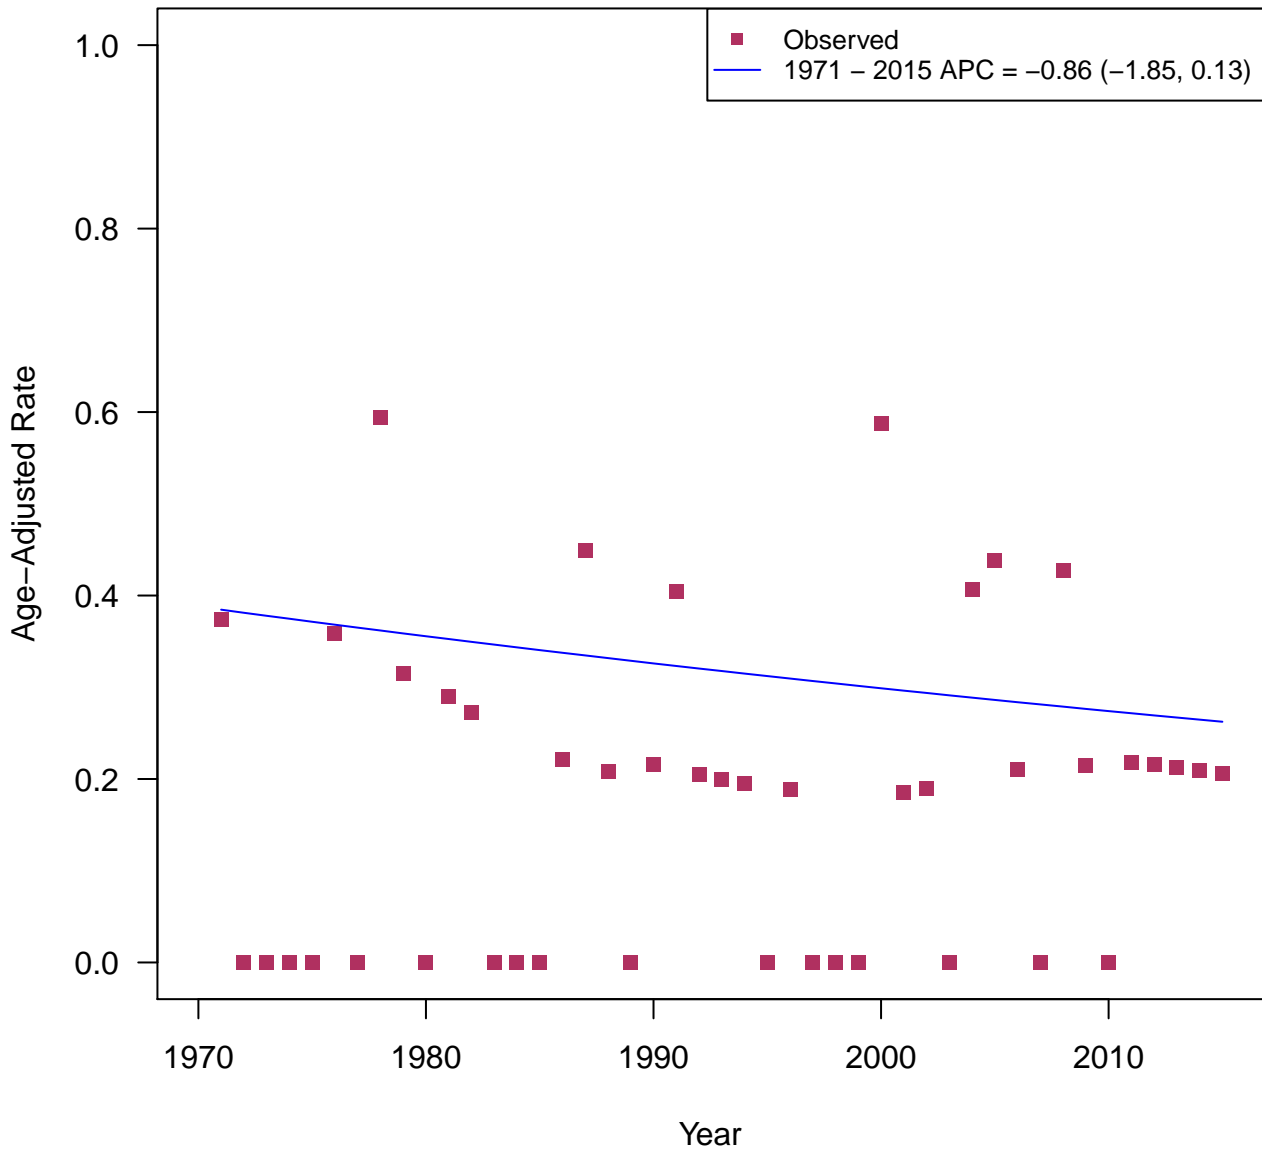

**Figure 325. Age-adjusted incidence rates of prostate cancer in males aged 40–49 years in Canada, 1971–2015**

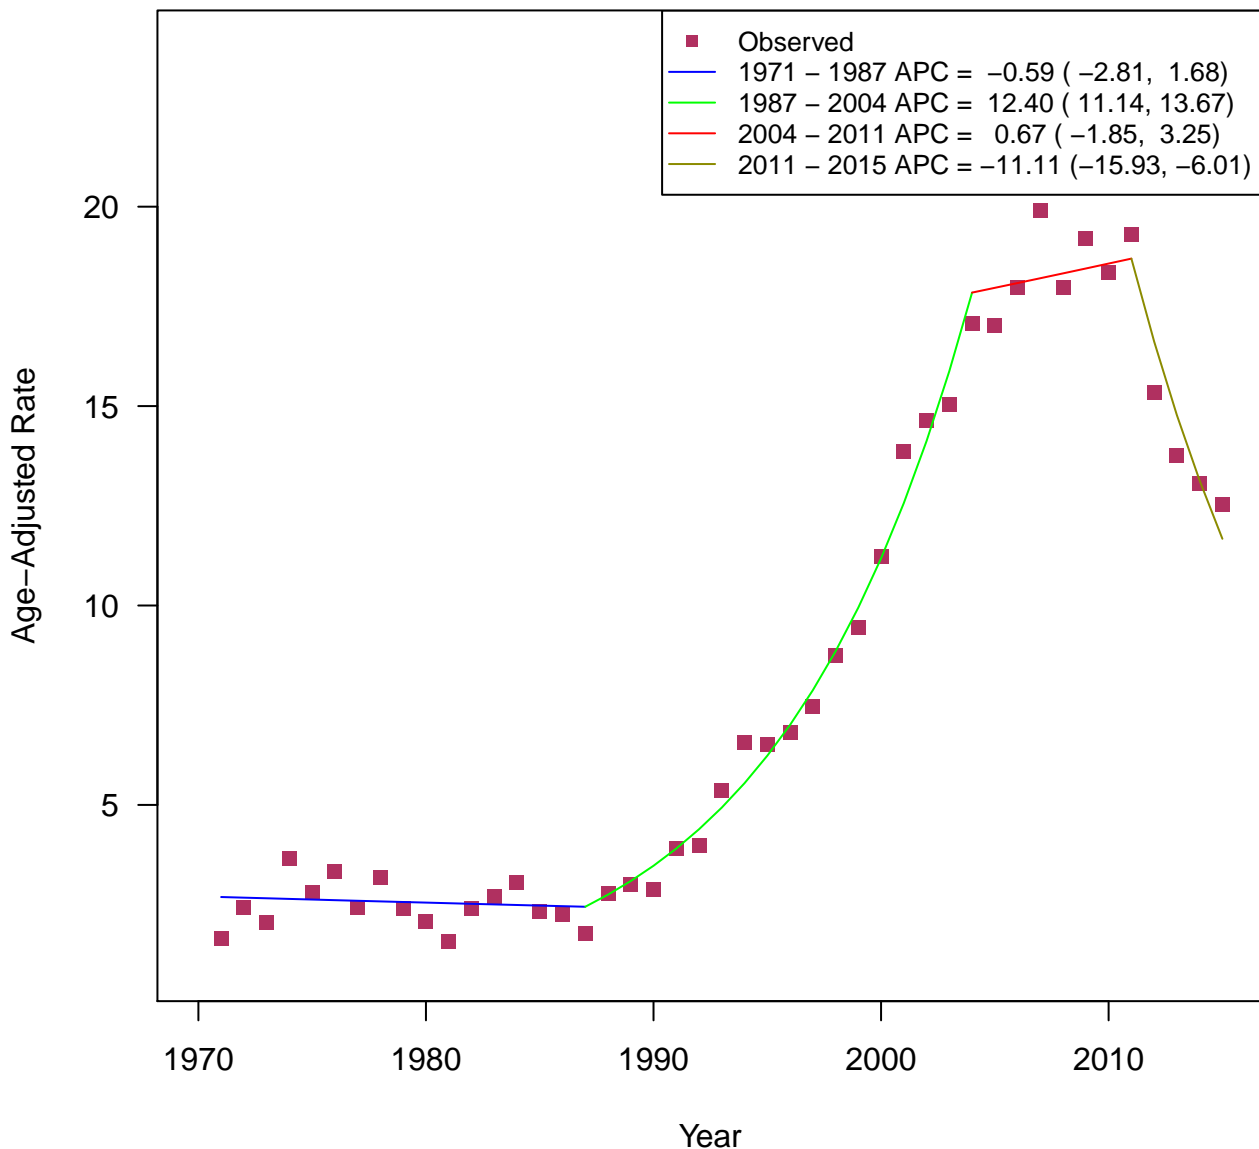

**Figure 326. Age-adjusted incidence rates of prostate cancer in males aged 50–59 years in Canada, 1971–2015**

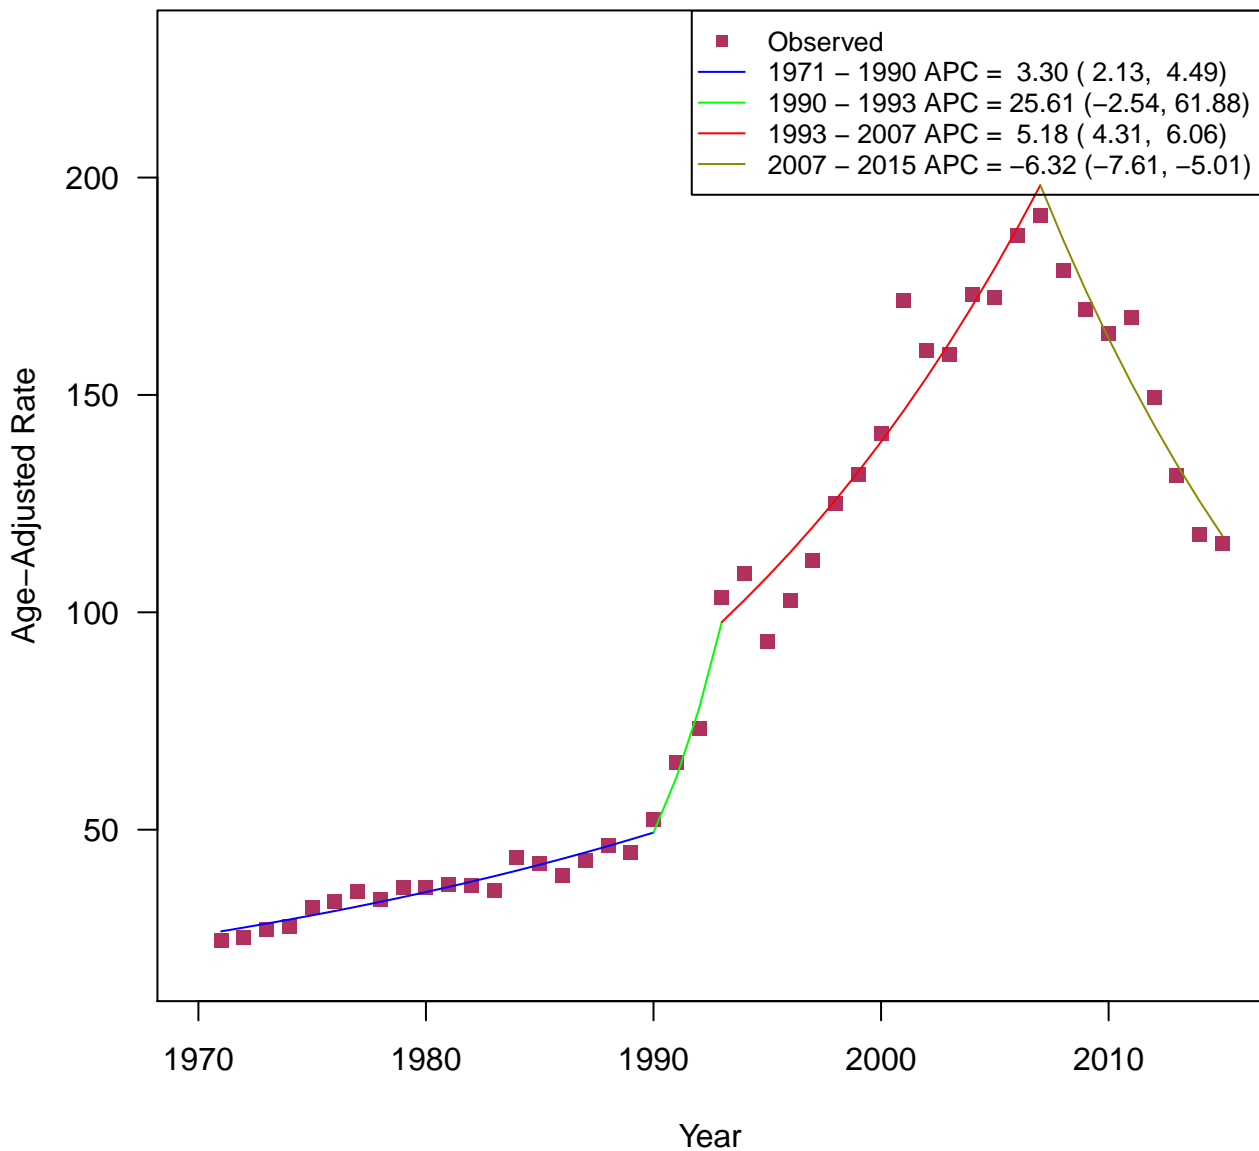

**Figure 327. Age-adjusted incidence rates of prostate cancer in males aged 60–69 years in Canada, 1971–2015**

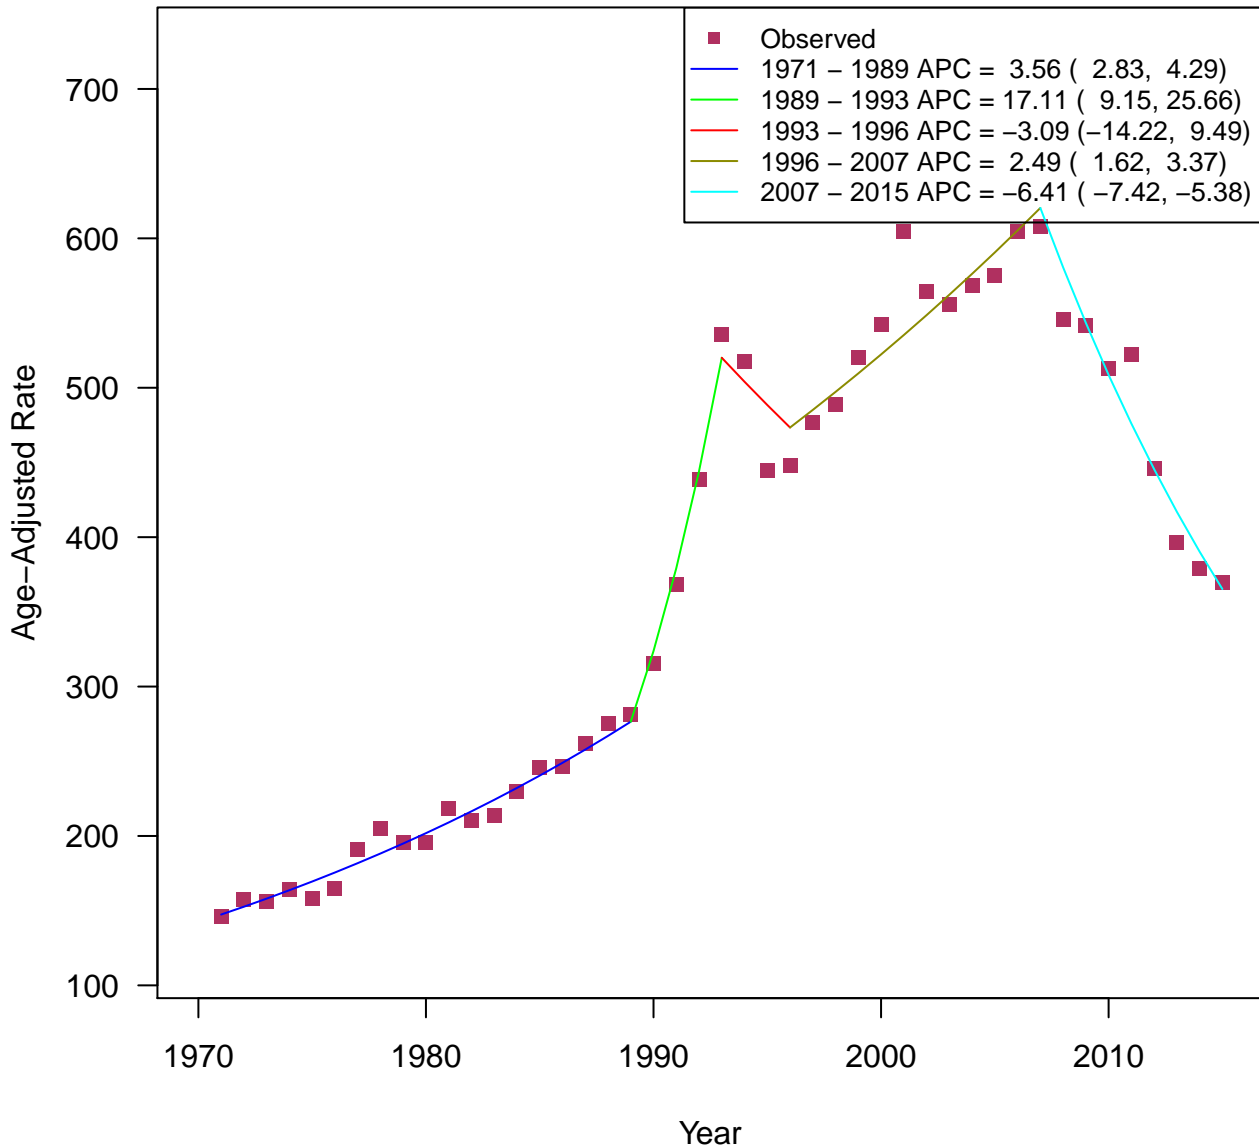

**Figure 328. Age-adjusted incidence rates of prostate cancer in males aged 70–79 years in Canada, 1971–2015**

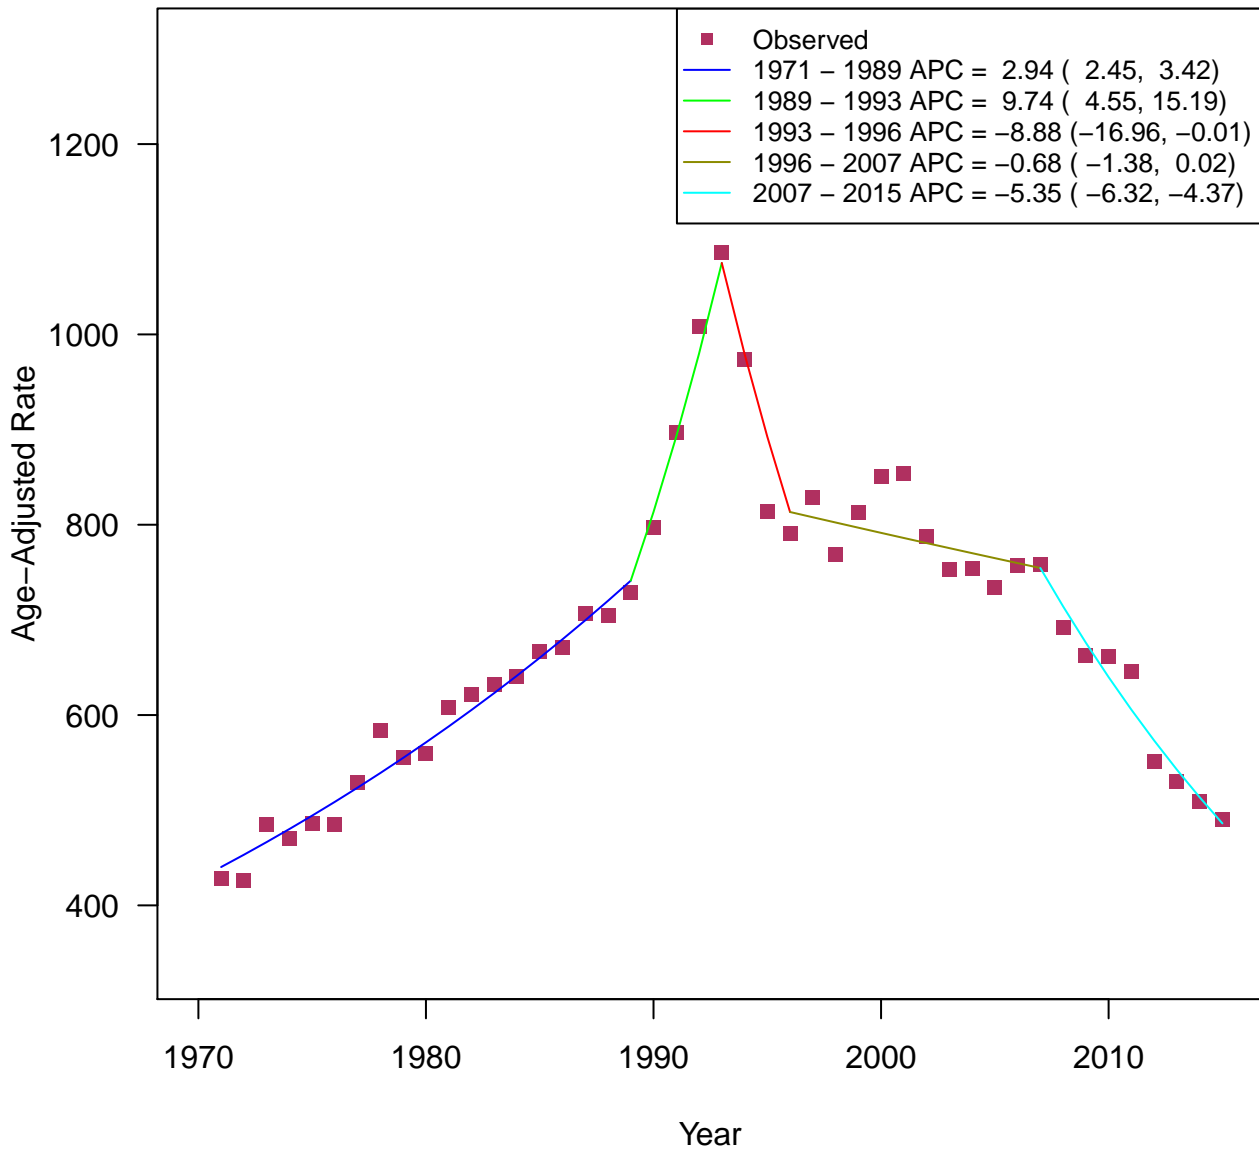

**Figure 329. Age-adjusted incidence rates of prostate cancer in males aged 80–89 years in Canada, 1971–2015**

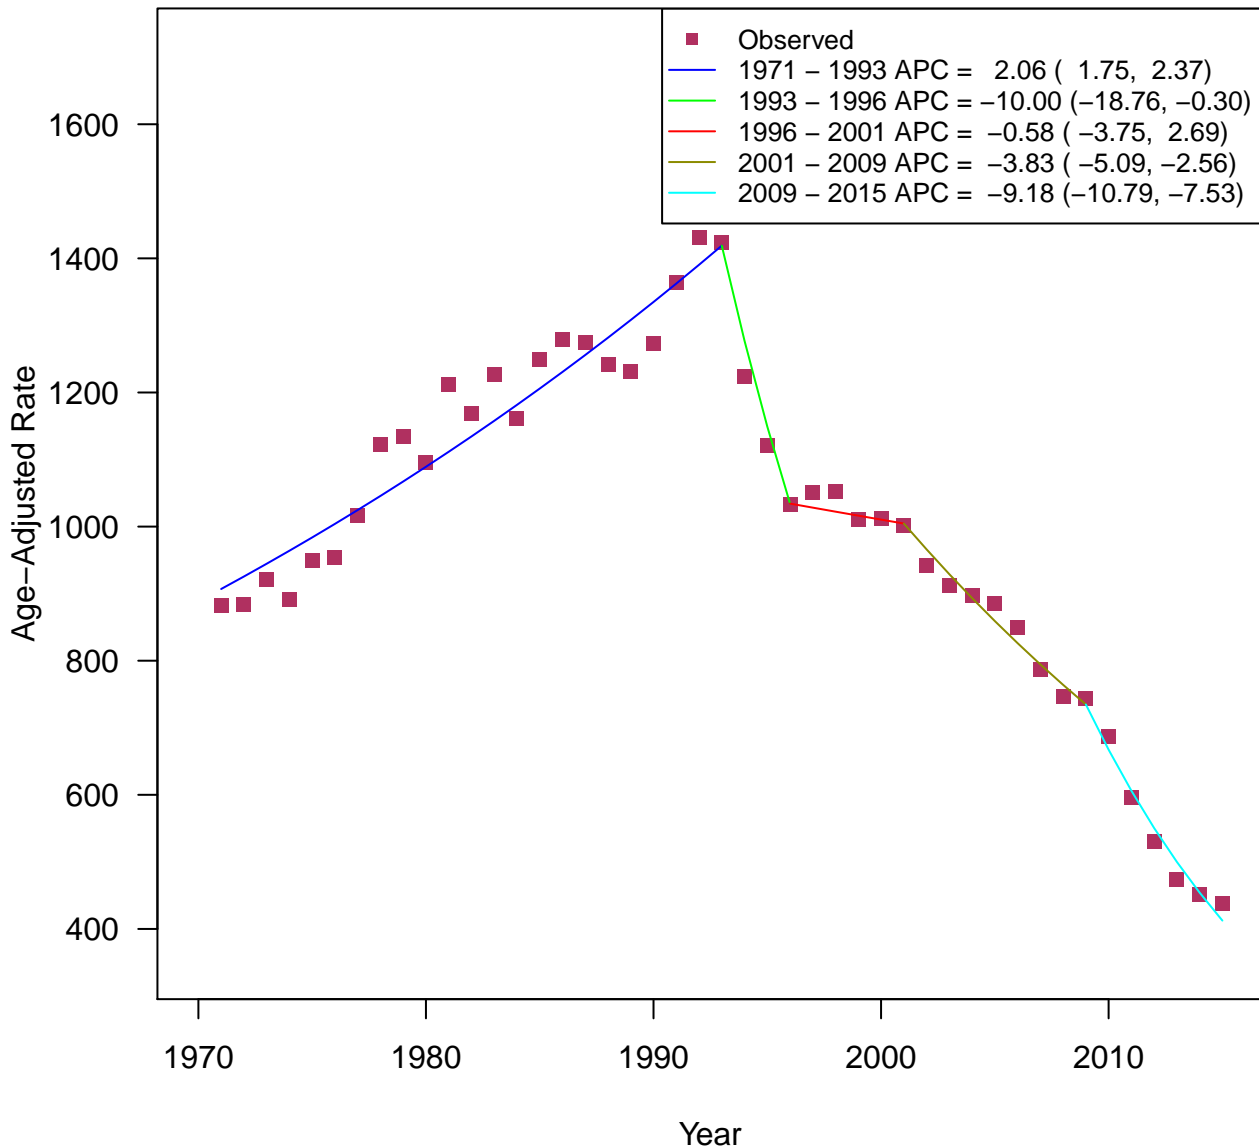

**Figure 330. Age-adjusted incidence rates of rectal cancer in males aged 20–29 years in Canada, 1971–2015**

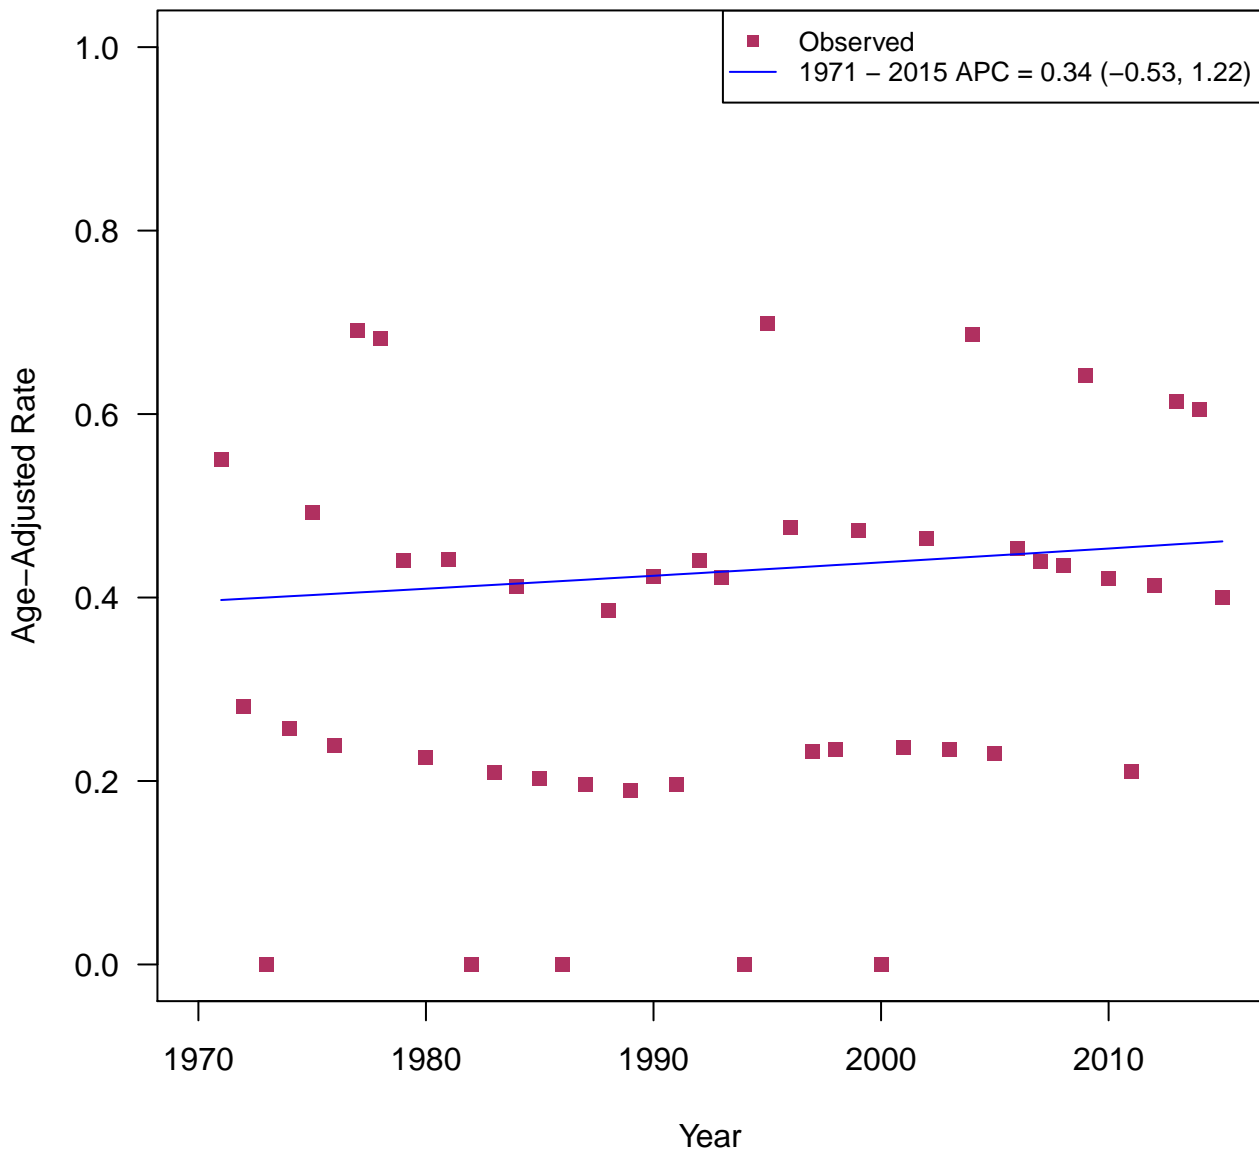

**Figure 331. Age-adjusted incidence rates of rectal cancer in males aged 20–39 years in Canada, 1971–2015**

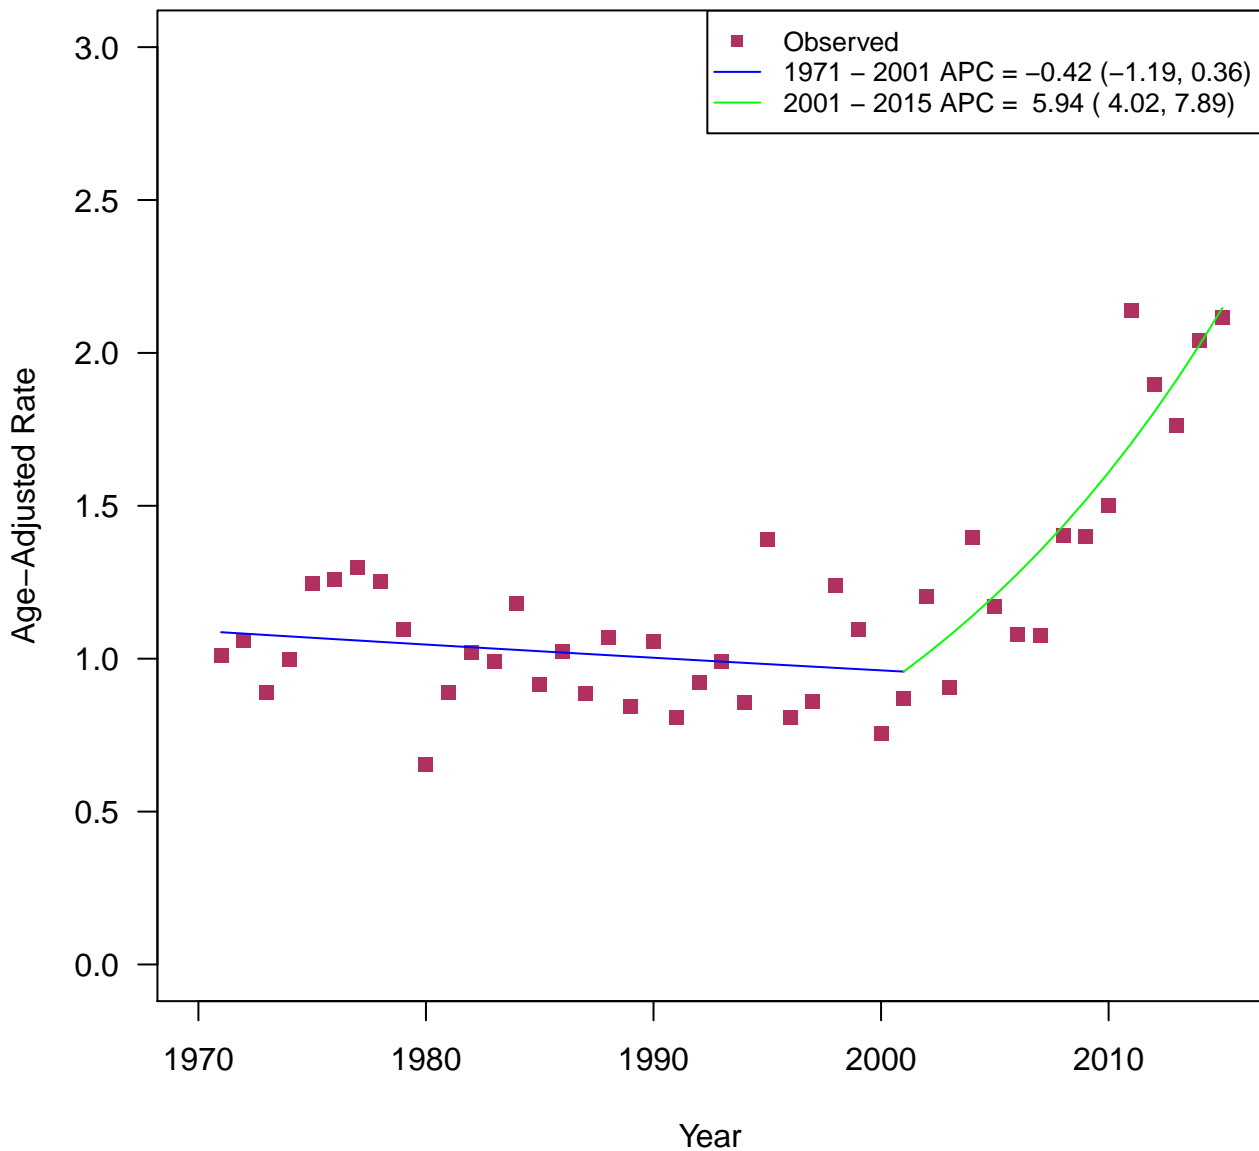



**Figure 332. Age-adjusted incidence rates of rectal cancer in males aged 20–49 years in Canada, 1971–2015**

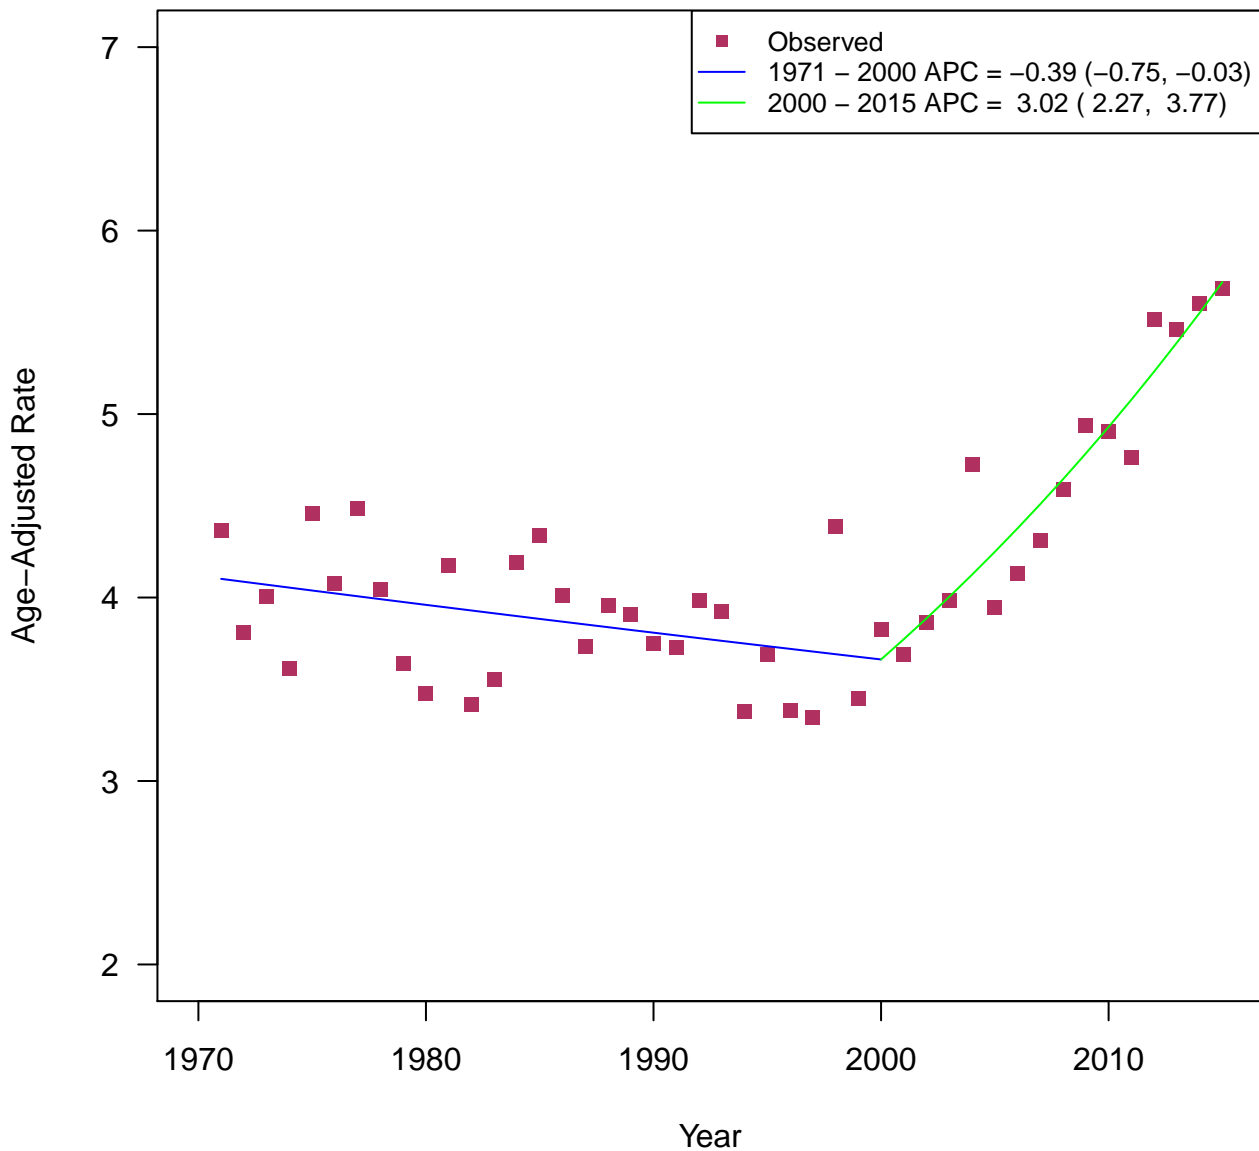

**Figure 333. Age-adjusted incidence rates of rectal cancer in males aged 30–39 years in Canada, 1971–2015**

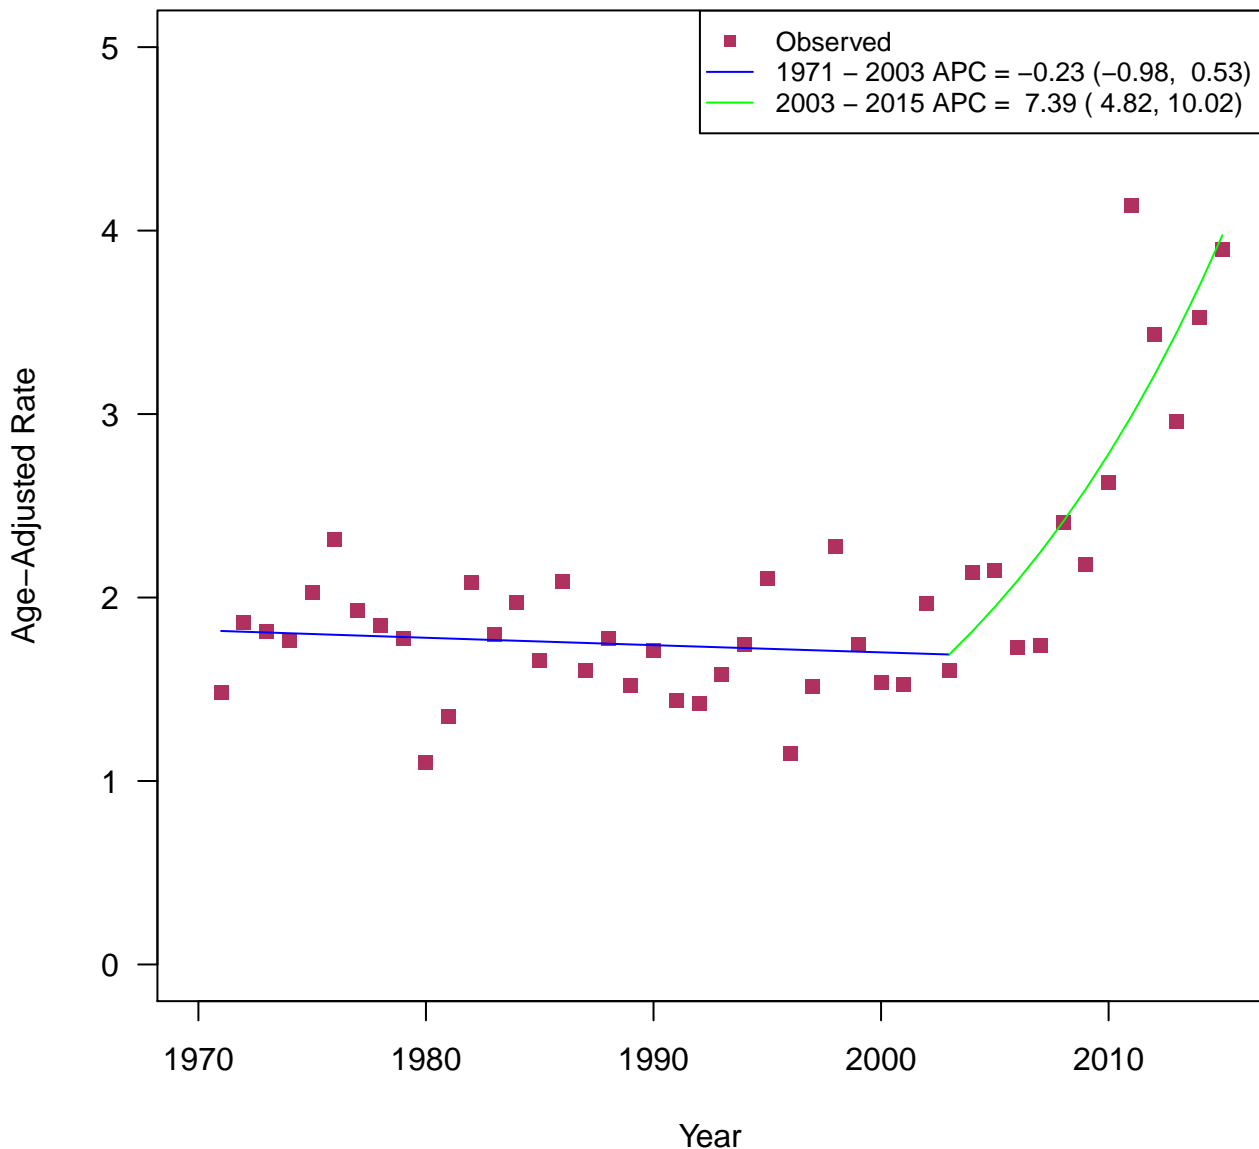

**Figure 334. Age-adjusted incidence rates of rectal cancer in males aged 40–49 years in Canada, 1971–2015**

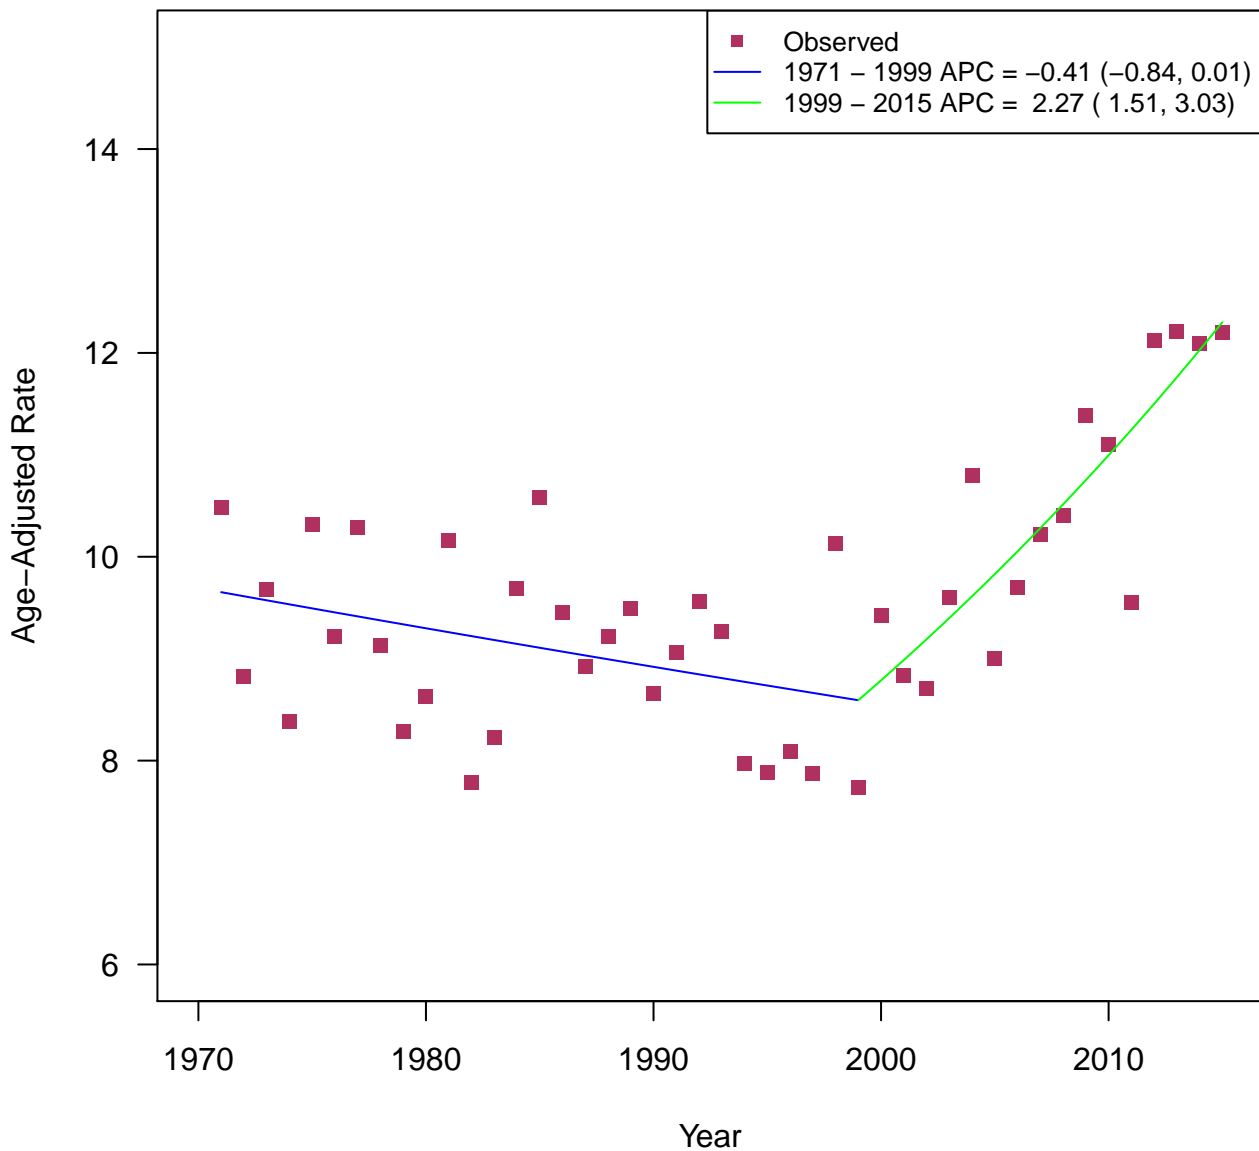

**Figure 335. Age-adjusted incidence rates of rectal cancer in males aged 50–59 years in Canada, 1971–2015**

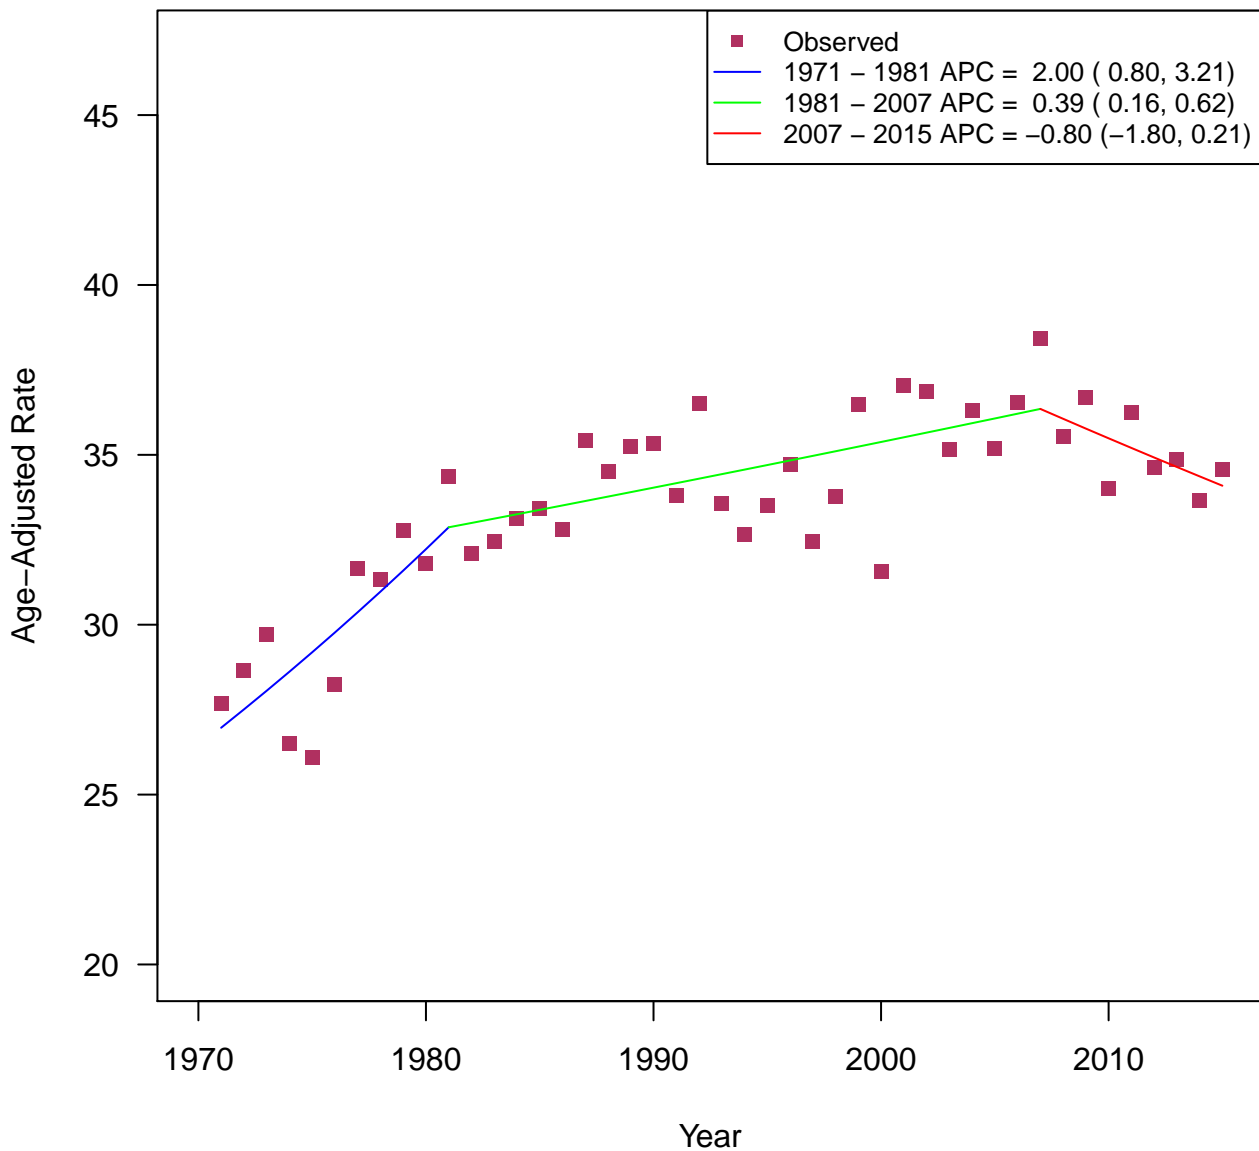

**Figure 336. Age-adjusted incidence rates of rectal cancer in males aged 60–69 years in Canada, 1971–2015**

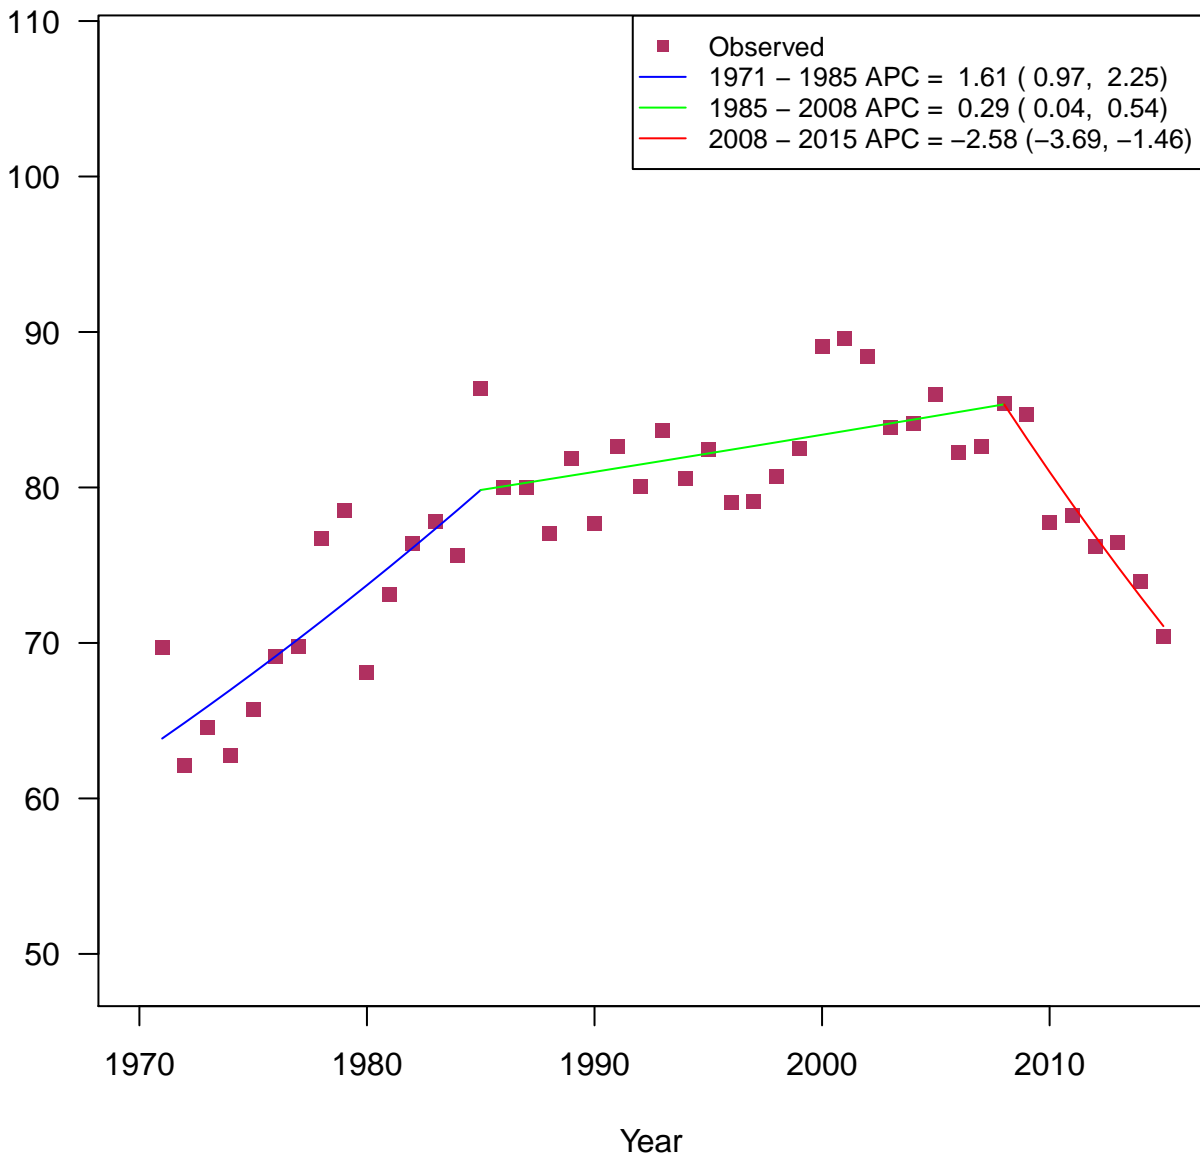

**Figure 337. Age-adjusted incidence rates of rectal cancer in males aged 70–79 years in Canada, 1971–2015**

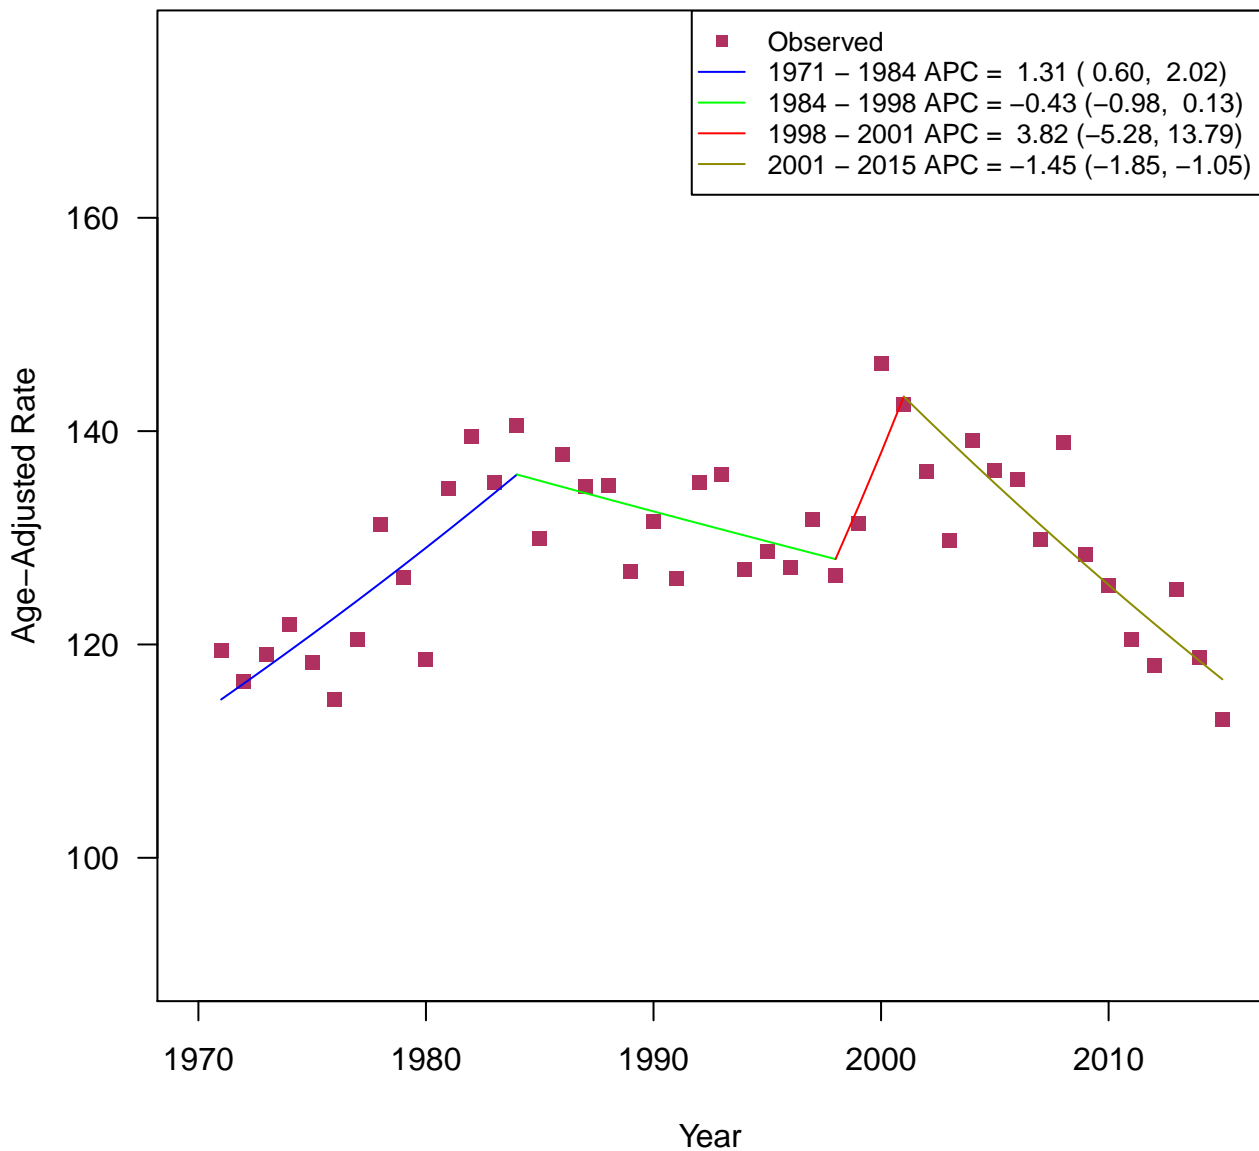

**Figure 338. Age-adjusted incidence rates of rectal cancer in males aged 80–89 years in Canada, 1971–2015**

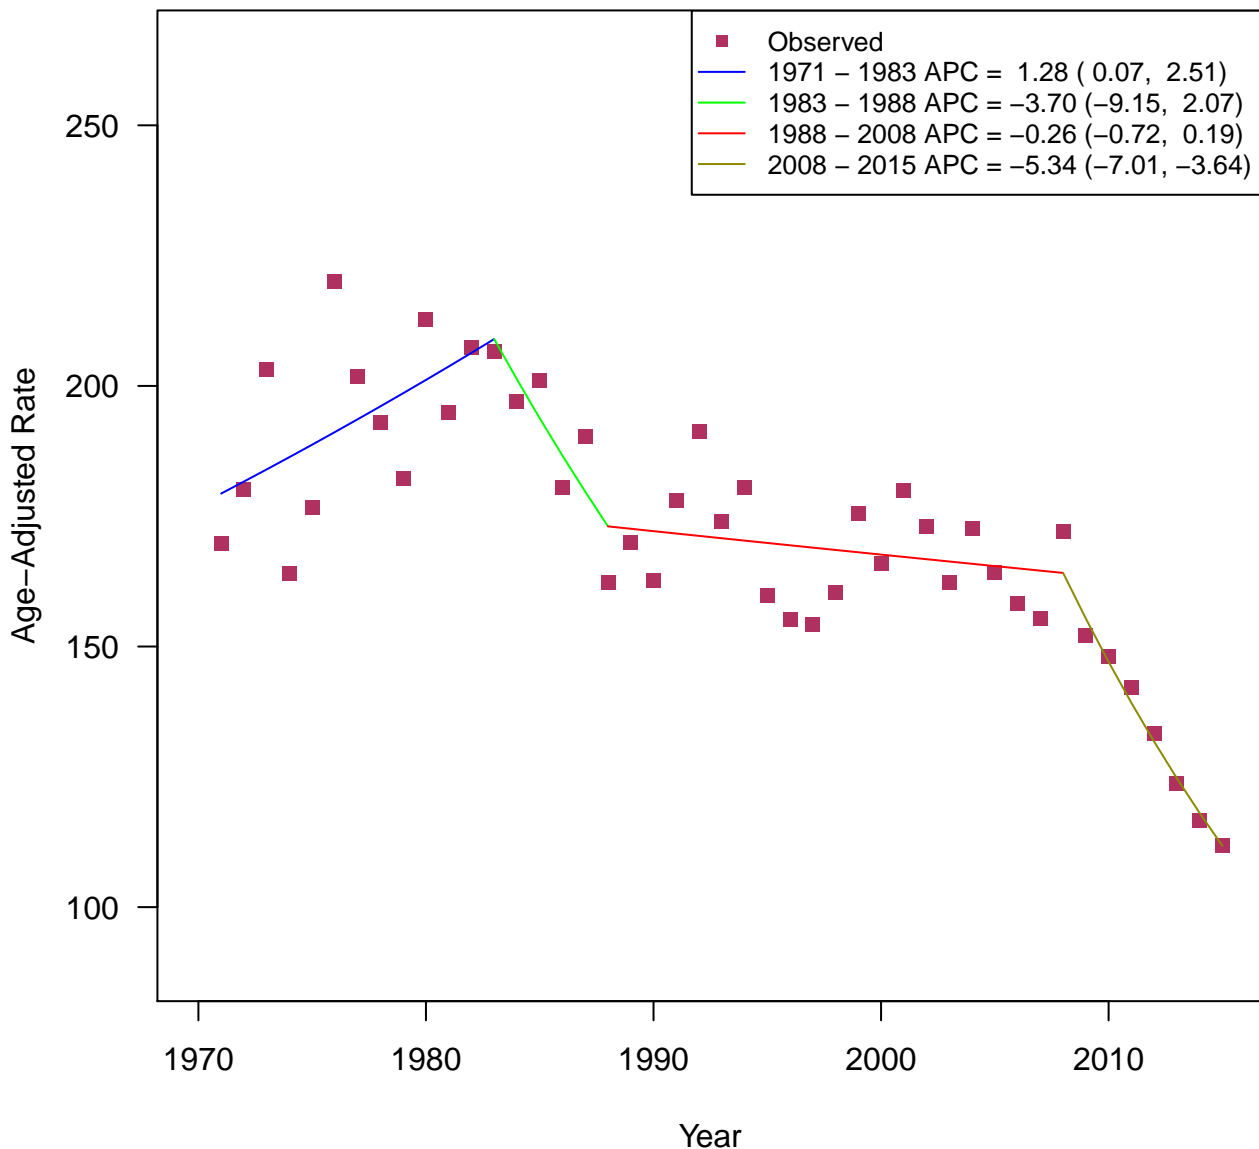

**Figure 339. Age-adjusted incidence rates of rectal cancer in females aged 20–29 years in Canada, 1971–2015**

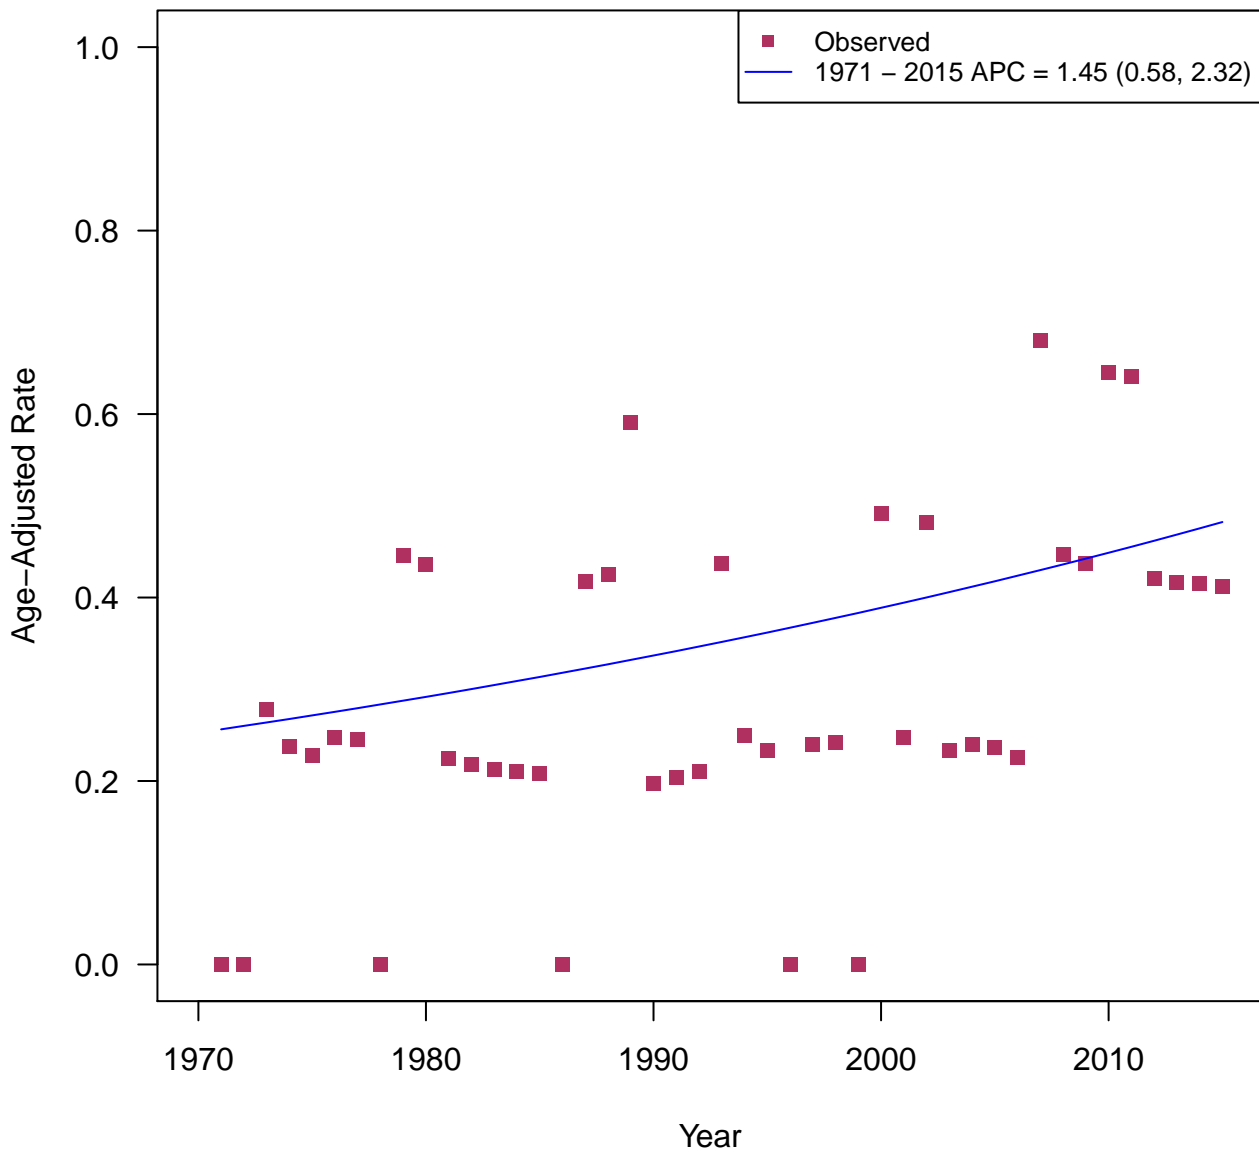



**Figure 340. Age-adjusted incidence rates of rectal cancer in females aged 20–39 years in Canada, 1971–2015**

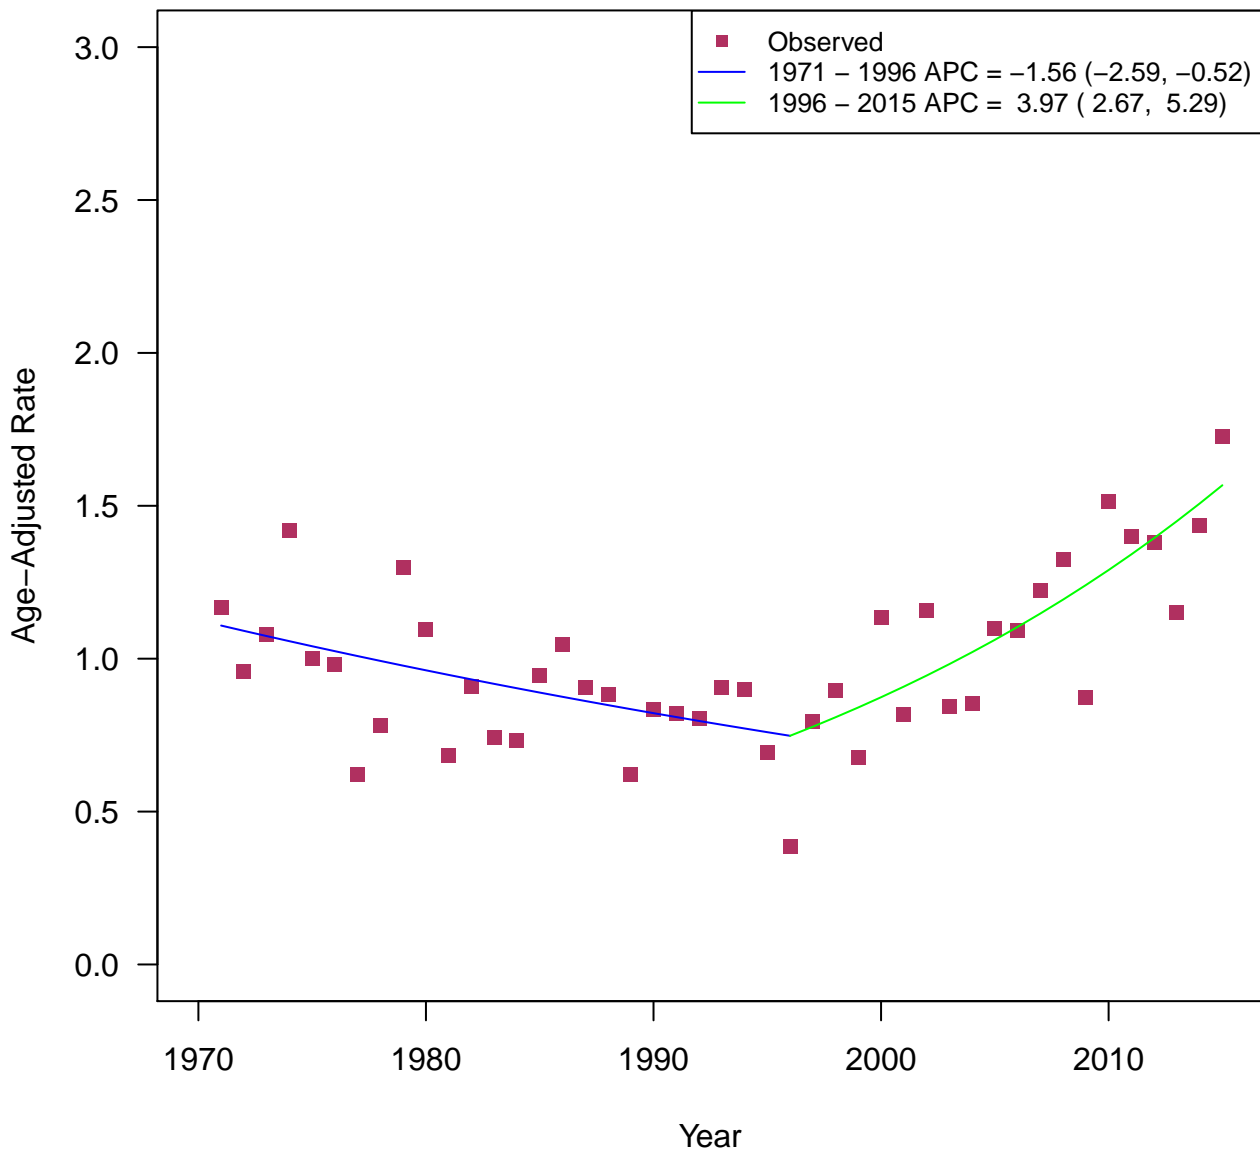

**Figure 341. Age-adjusted incidence rates of rectal cancer in females aged 30–39 years in Canada, 1971–2015**

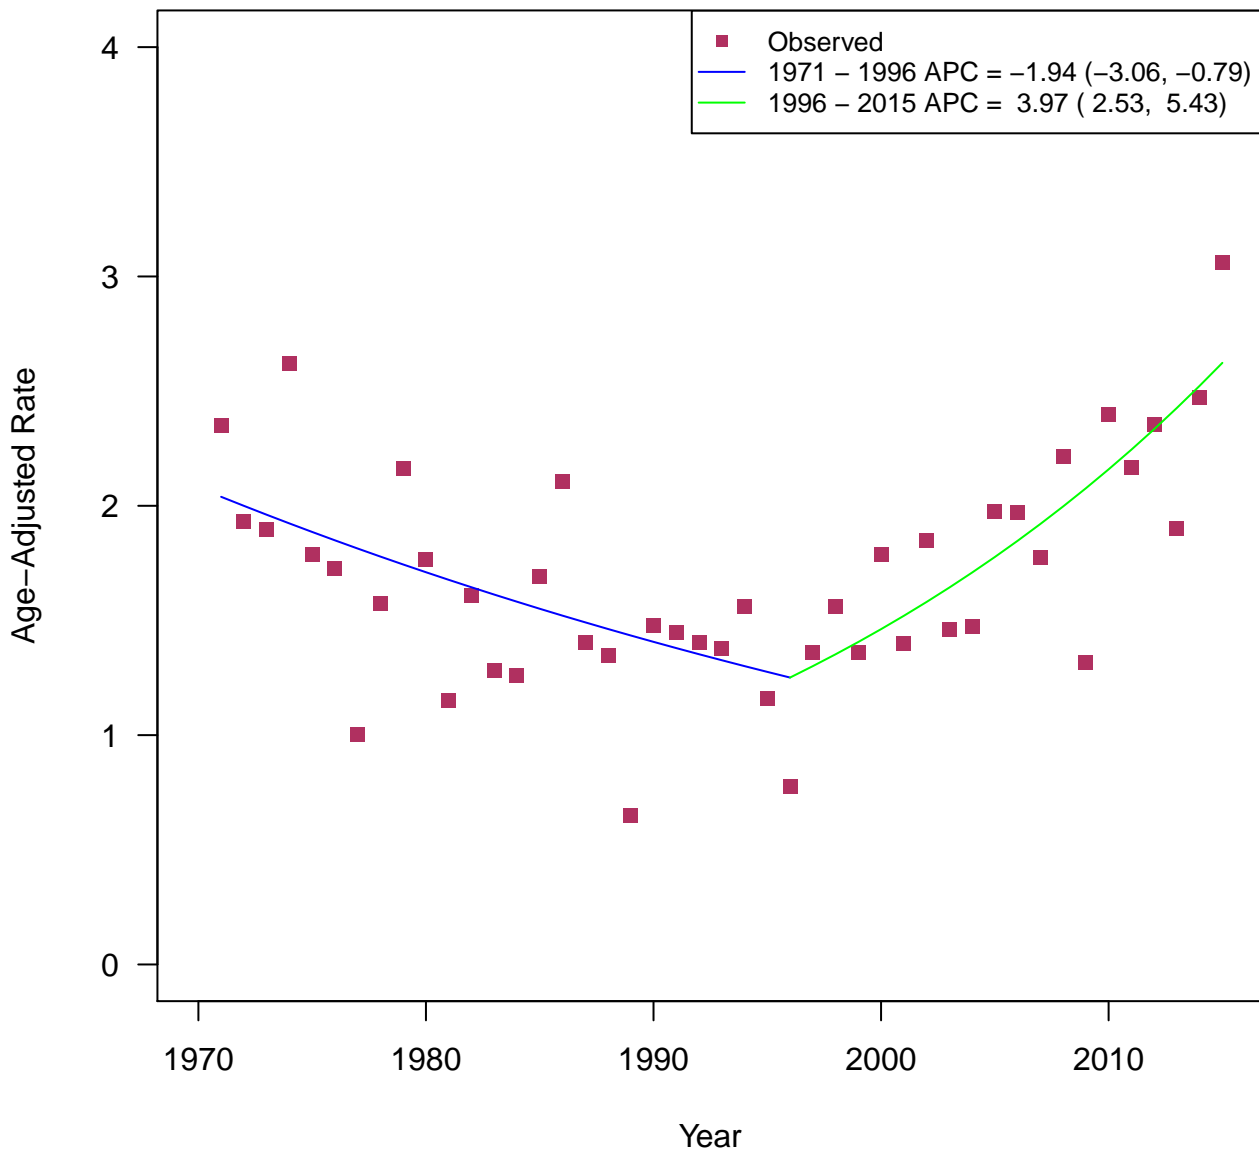

**Figure 342. Age-adjusted incidence rates of rectal cancer in females aged 40–49 years in Canada, 1971–2015**

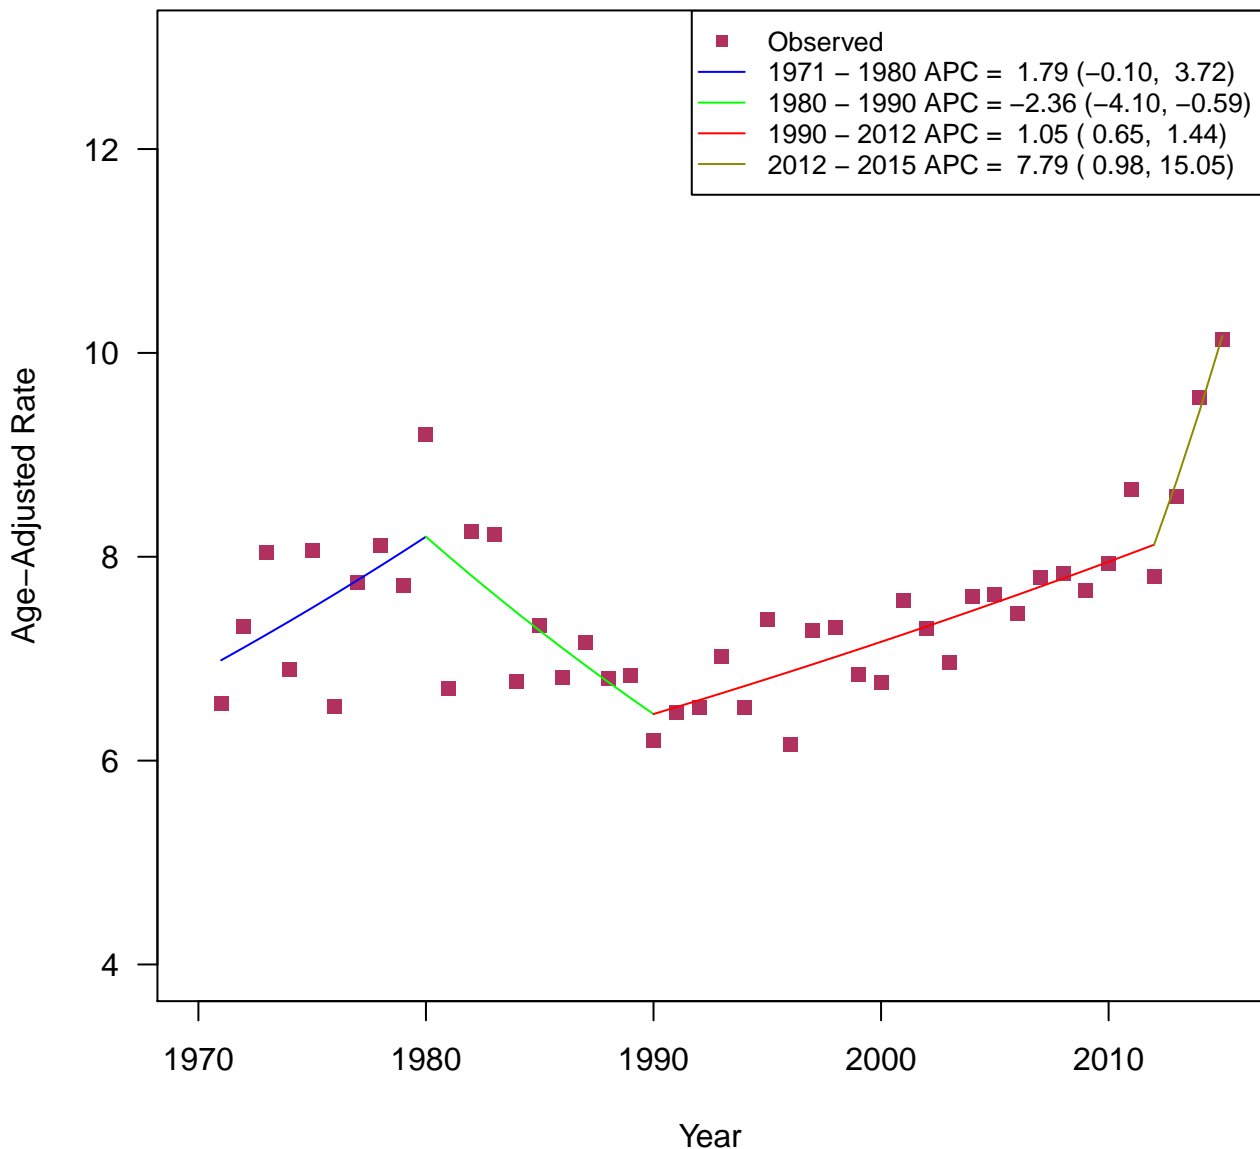

**Figure 343. Age-adjusted incidence rates of rectal cancer in females aged 50–59 years in Canada, 1971–2015**

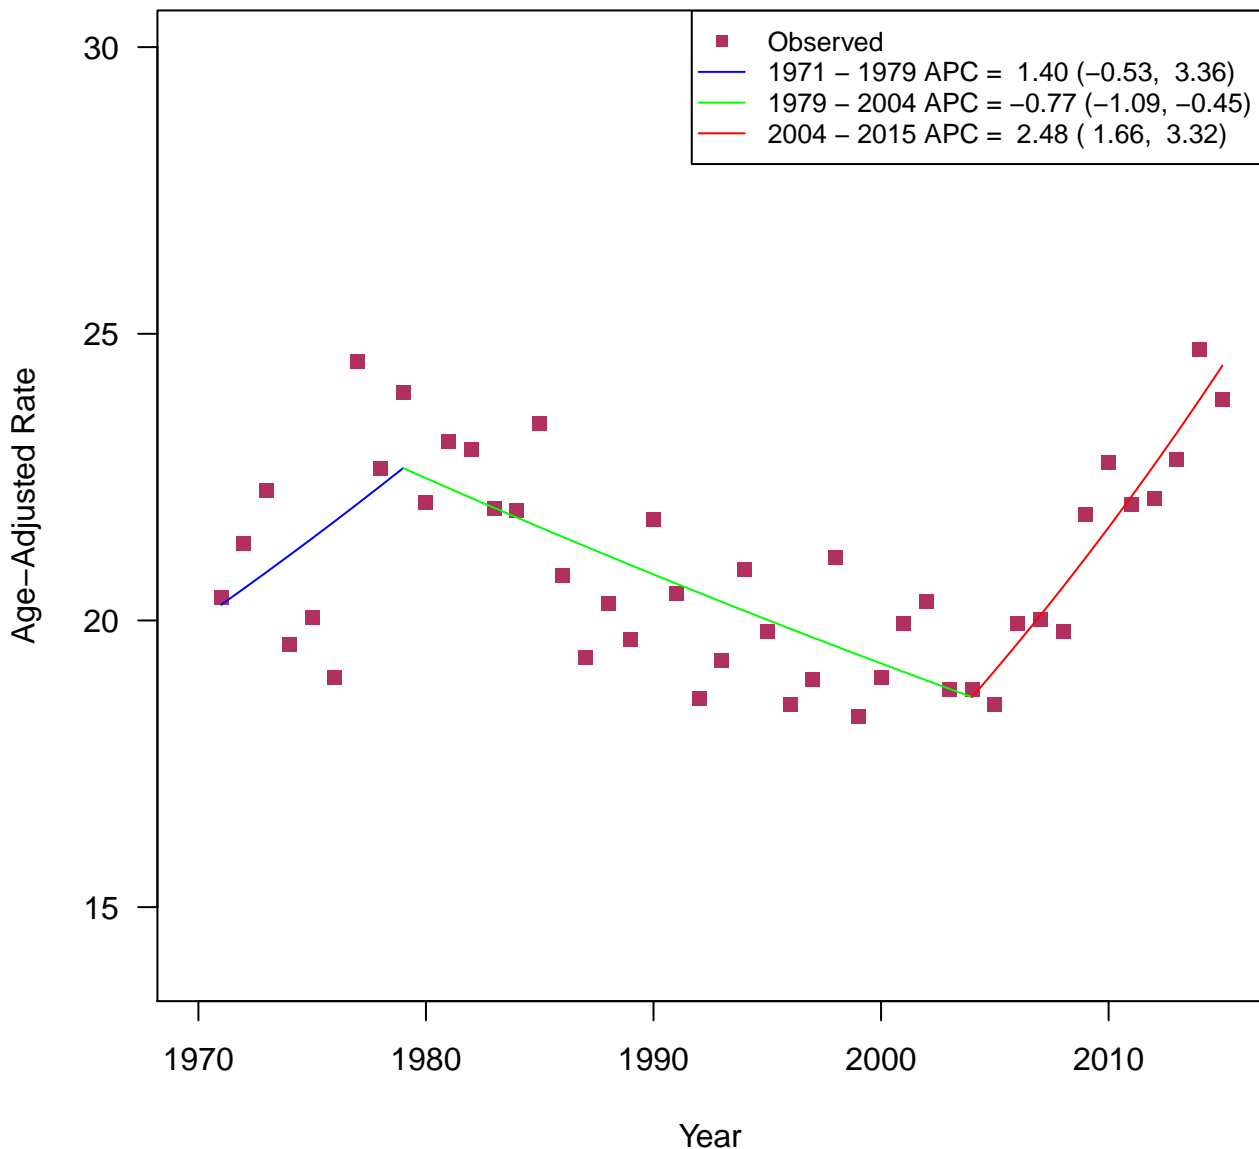

**Figure 344. Age-adjusted incidence rates of rectal cancer in females aged 60–69 years in Canada, 1971–2015**

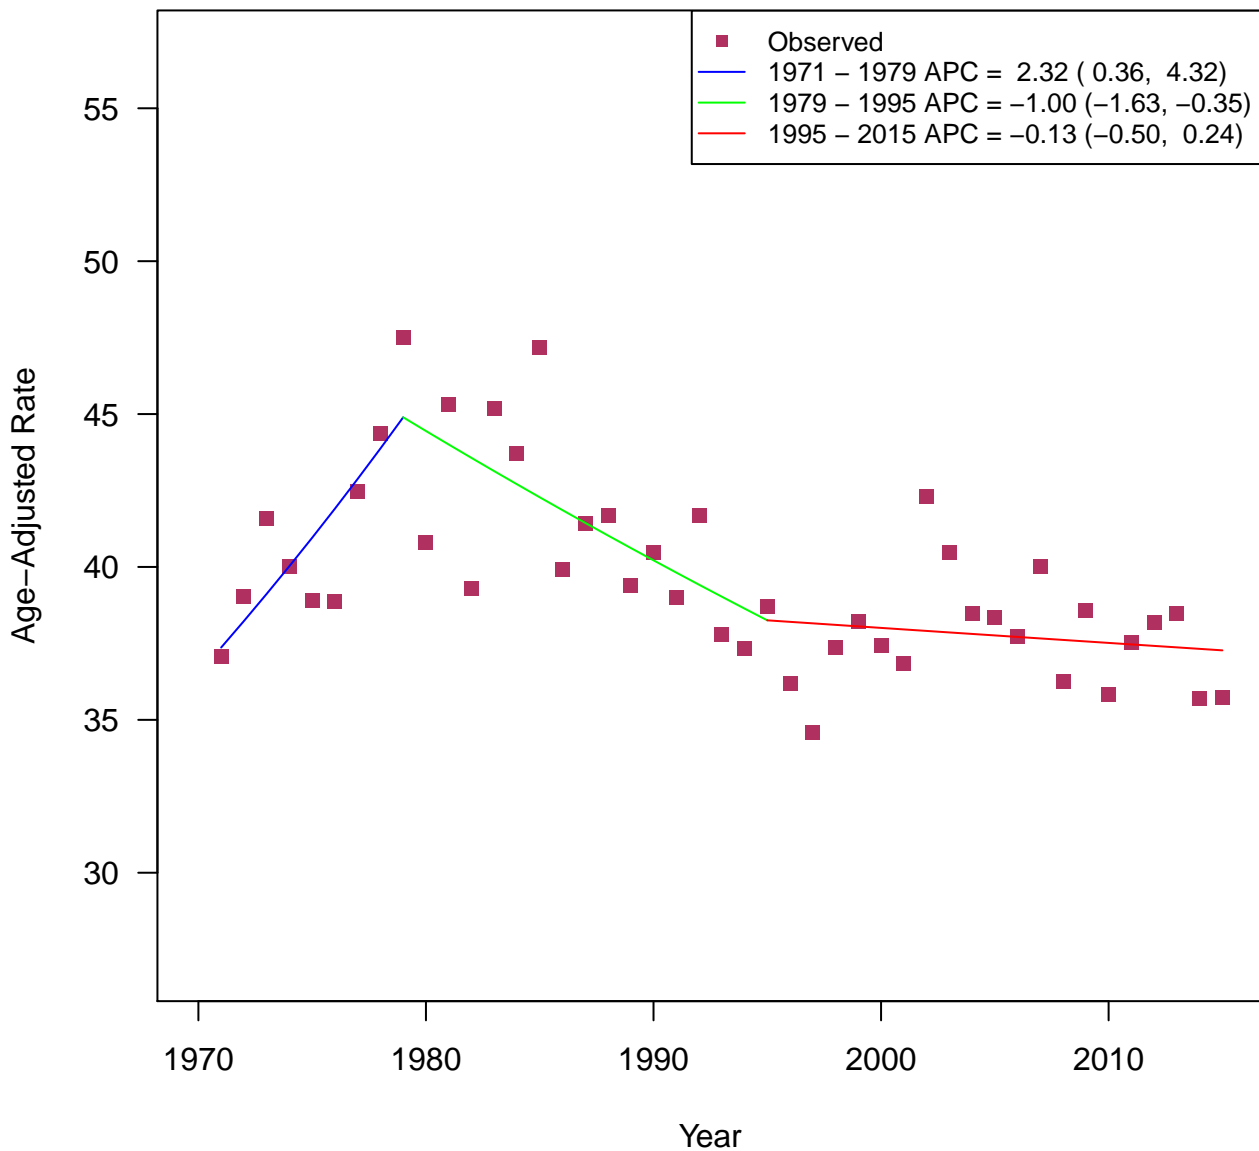

**Figure 345. Age-adjusted incidence rates of rectal cancer in females aged 70–79 years in Canada, 1971–2015**

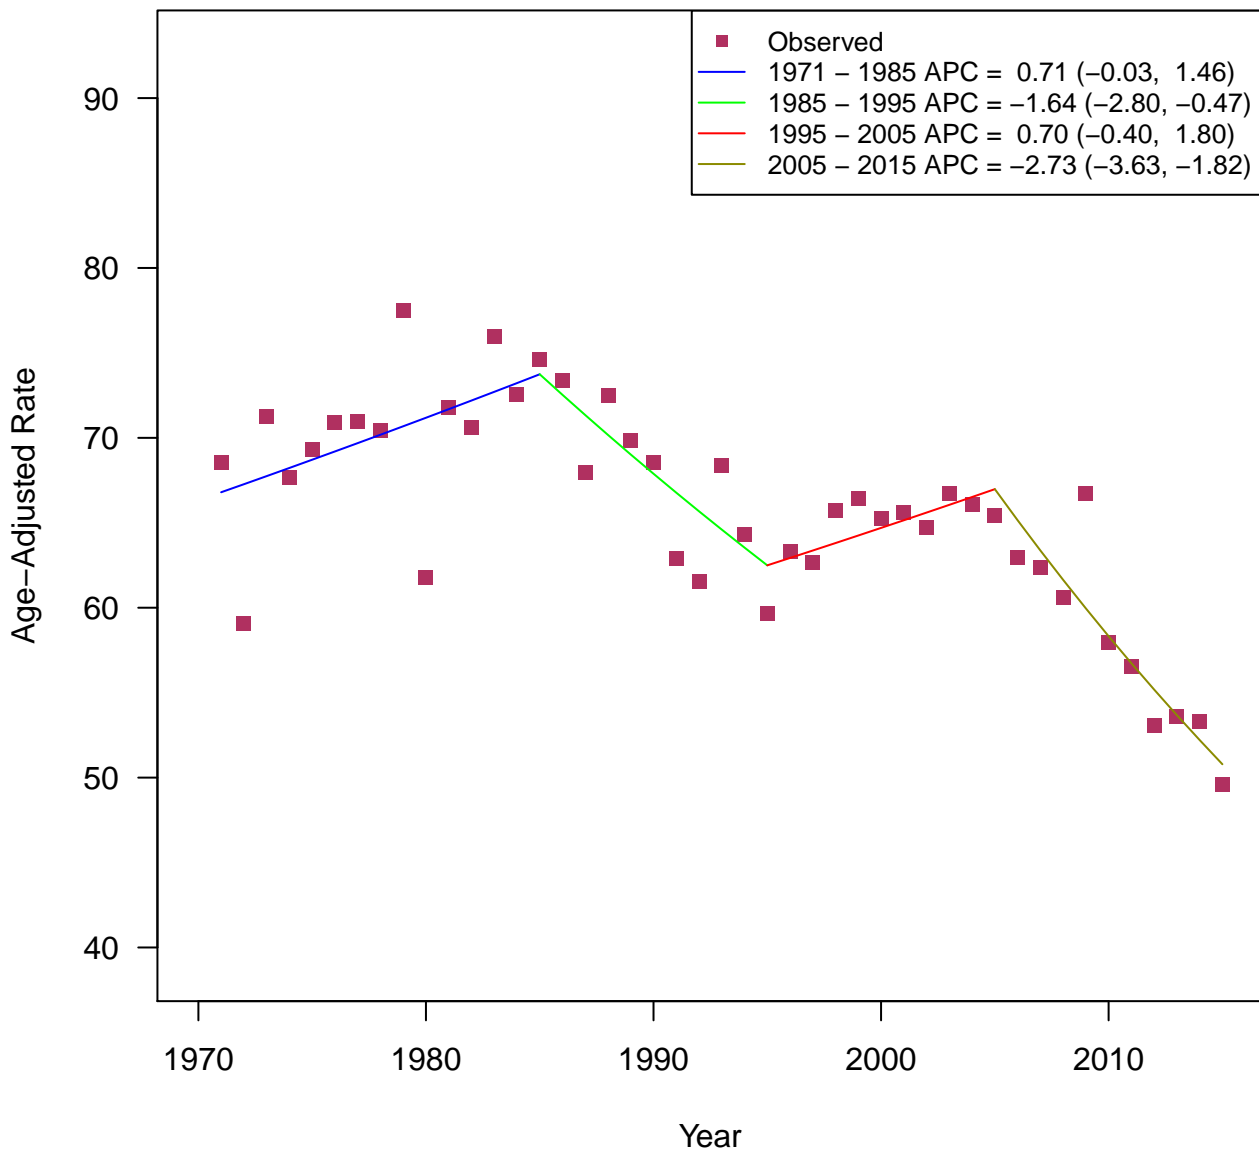

**Figure 346. Age-adjusted incidence rates of rectal cancer in females aged 80–89 years in Canada, 1971–2015**

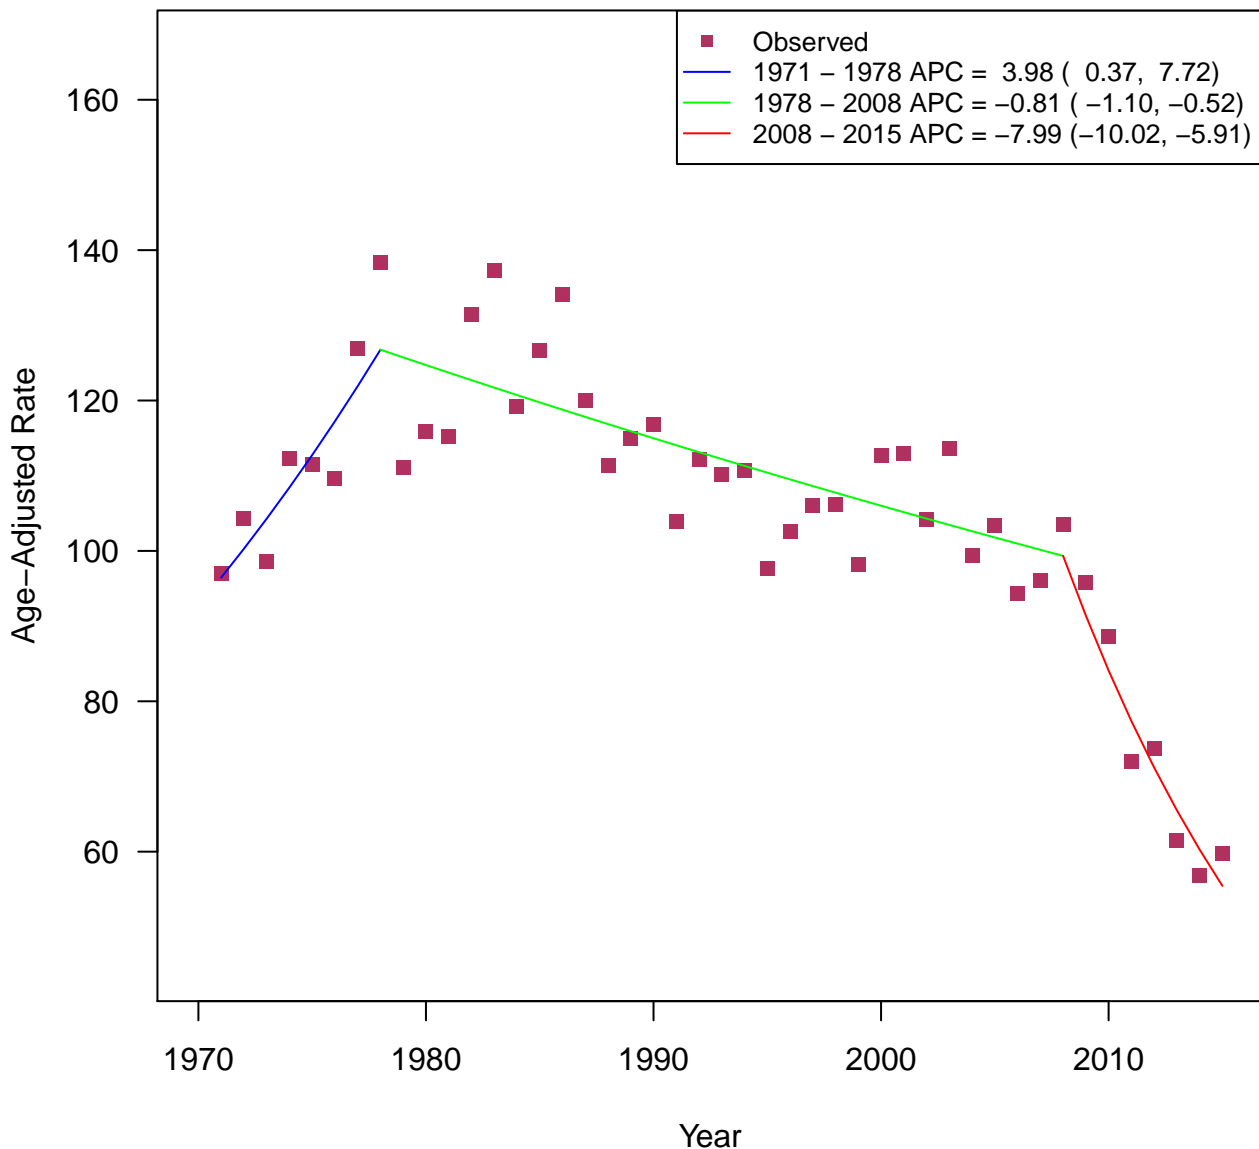

**Figure 347. Age-adjusted incidence rates of skin melanoma in males aged 20–29 years in Canada, 1971–2015**

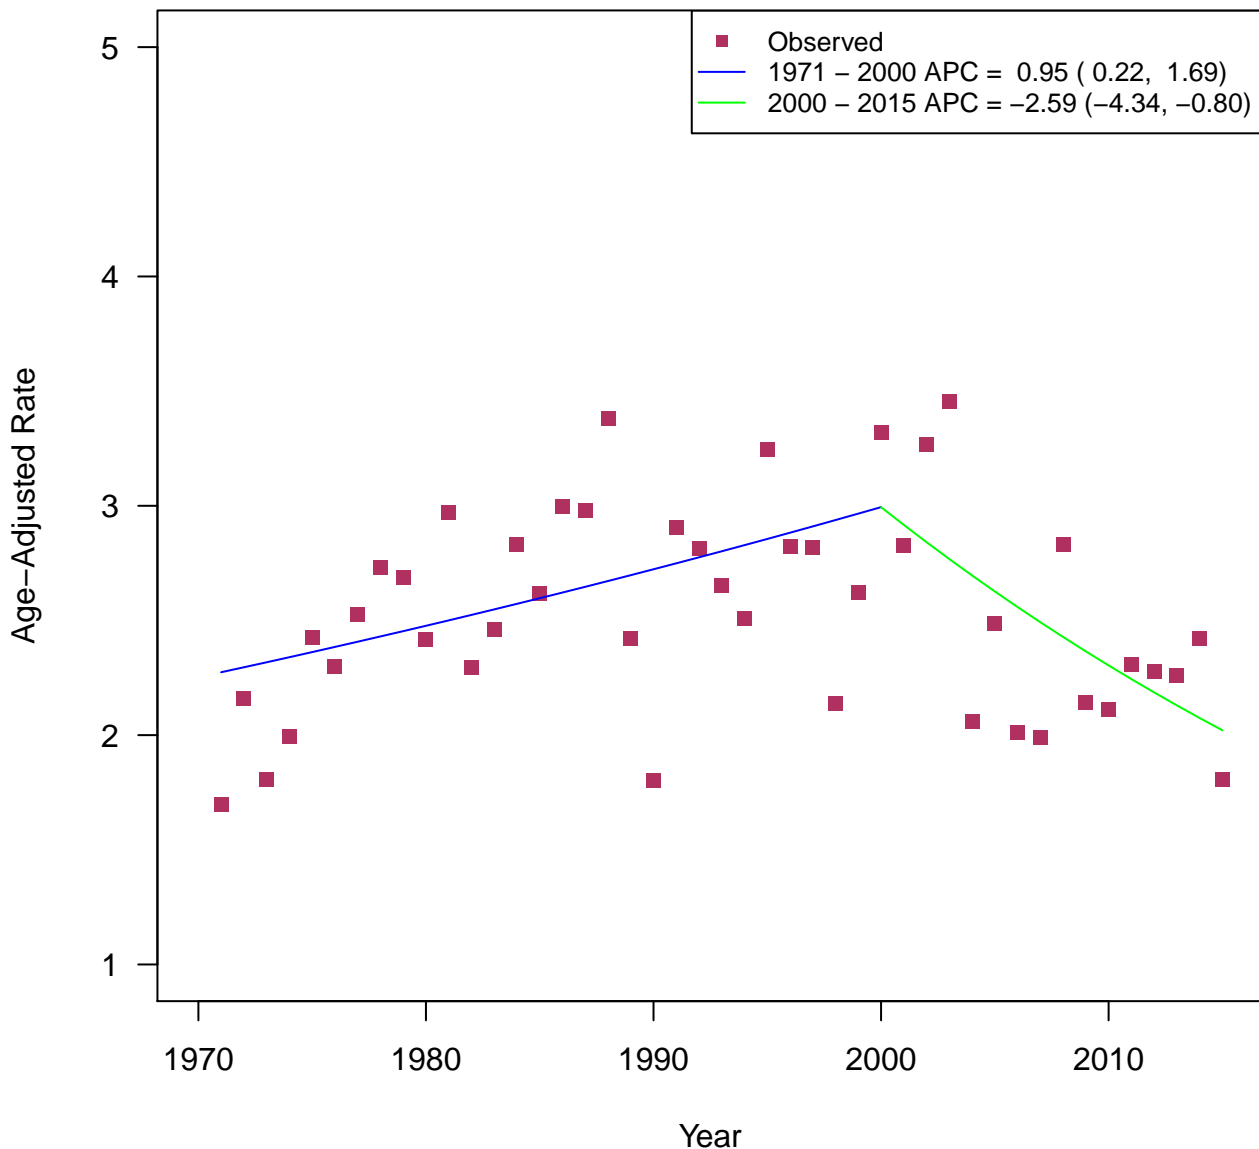



**Figure 348. Age-adjusted incidence rates of skin melanoma in males aged 20–39 years in Canada, 1971–2015**

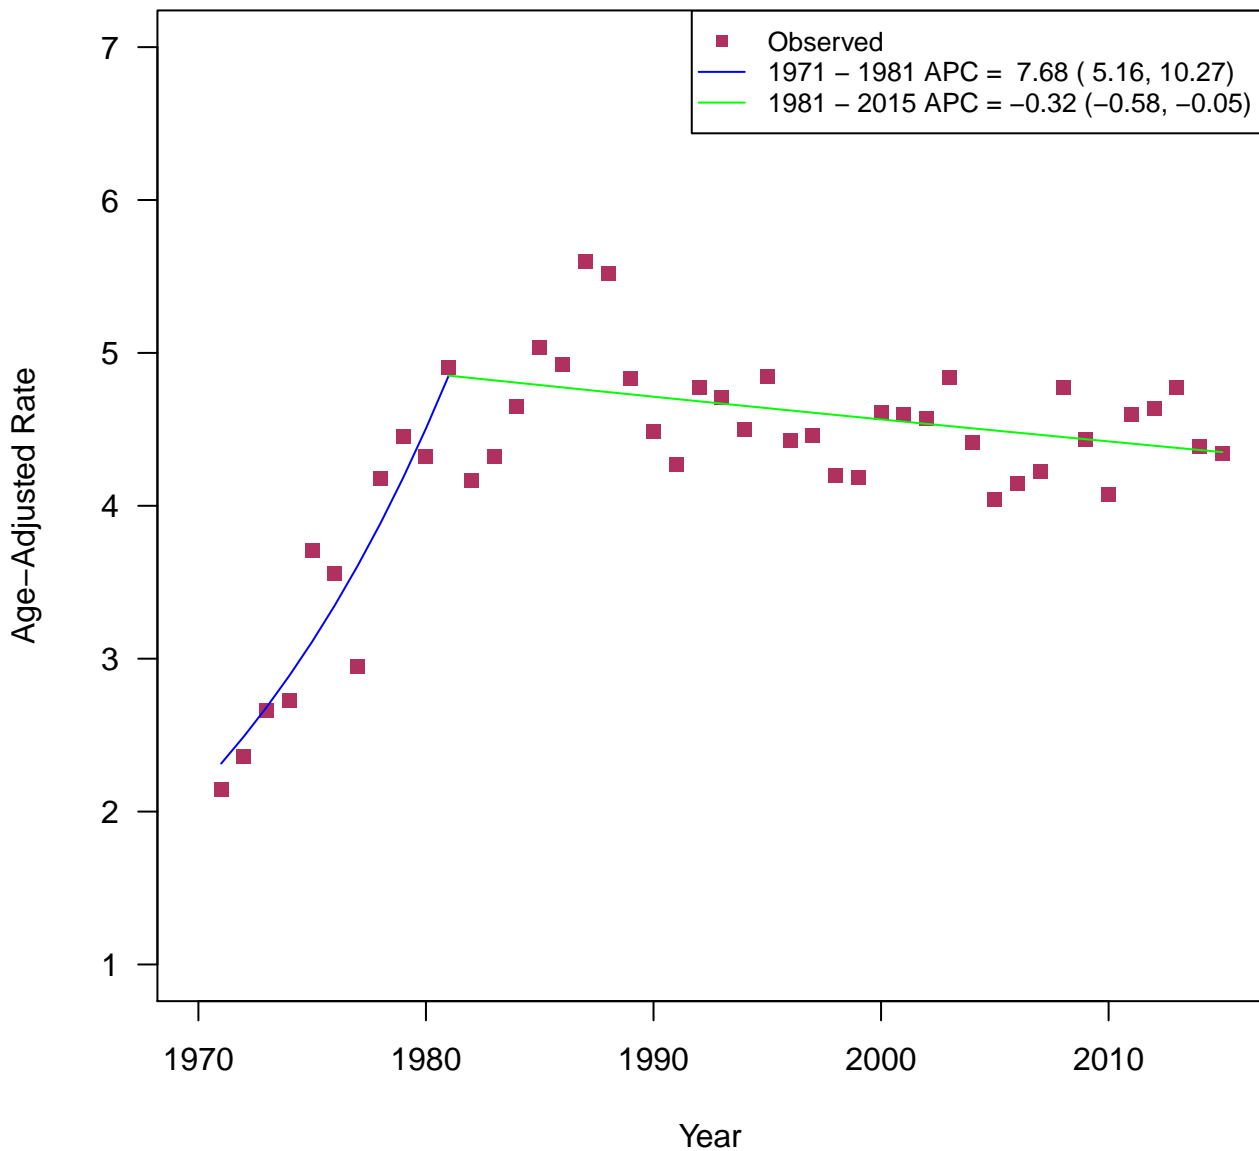

**Figure 349. Age-adjusted incidence rates of skin melanoma in males aged 20–49 years in Canada, 1971–2015**

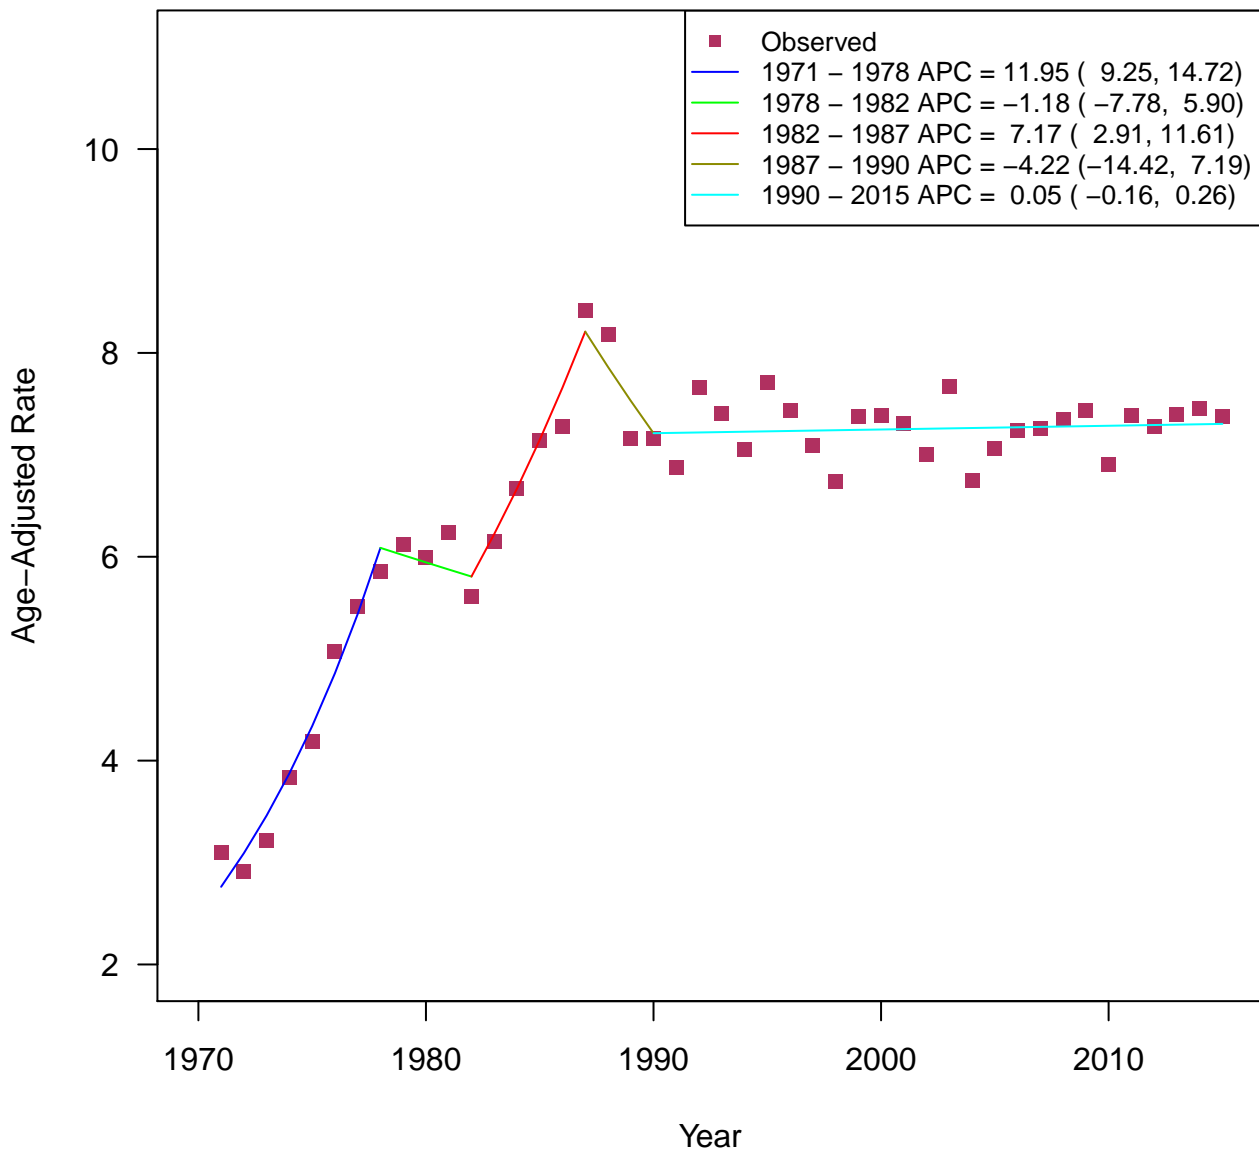

**Figure 350. Age-adjusted incidence rates of skin melanoma in males aged 30–39 years in Canada, 1971–2015**

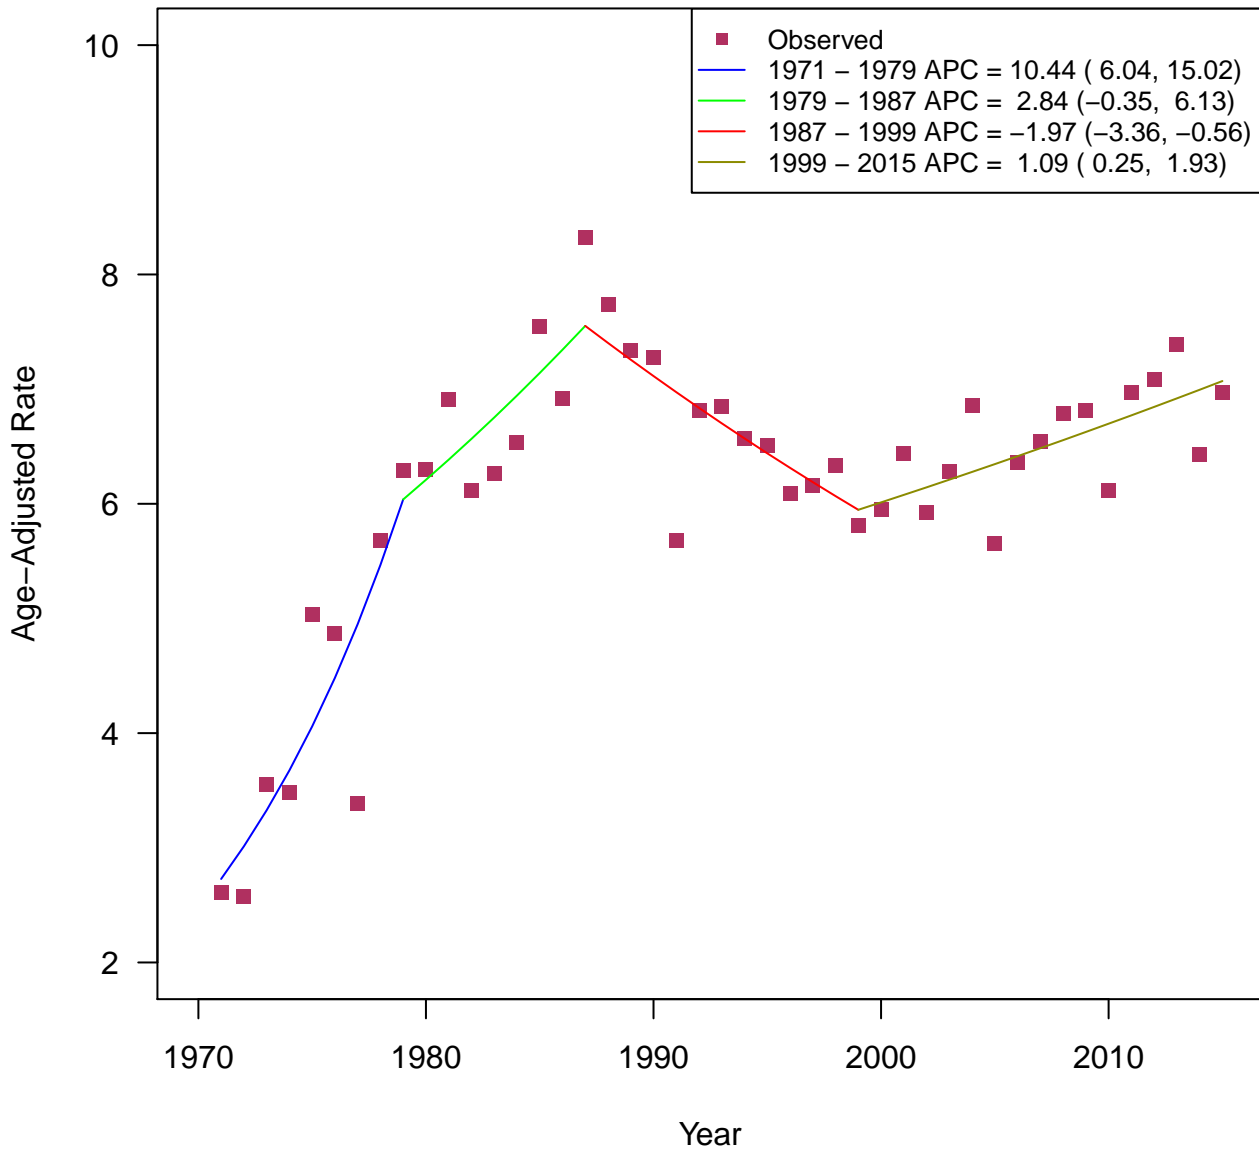

**Figure 351. Age-adjusted incidence rates of skin melanoma in males aged 40–49 years in Canada, 1971–2015**

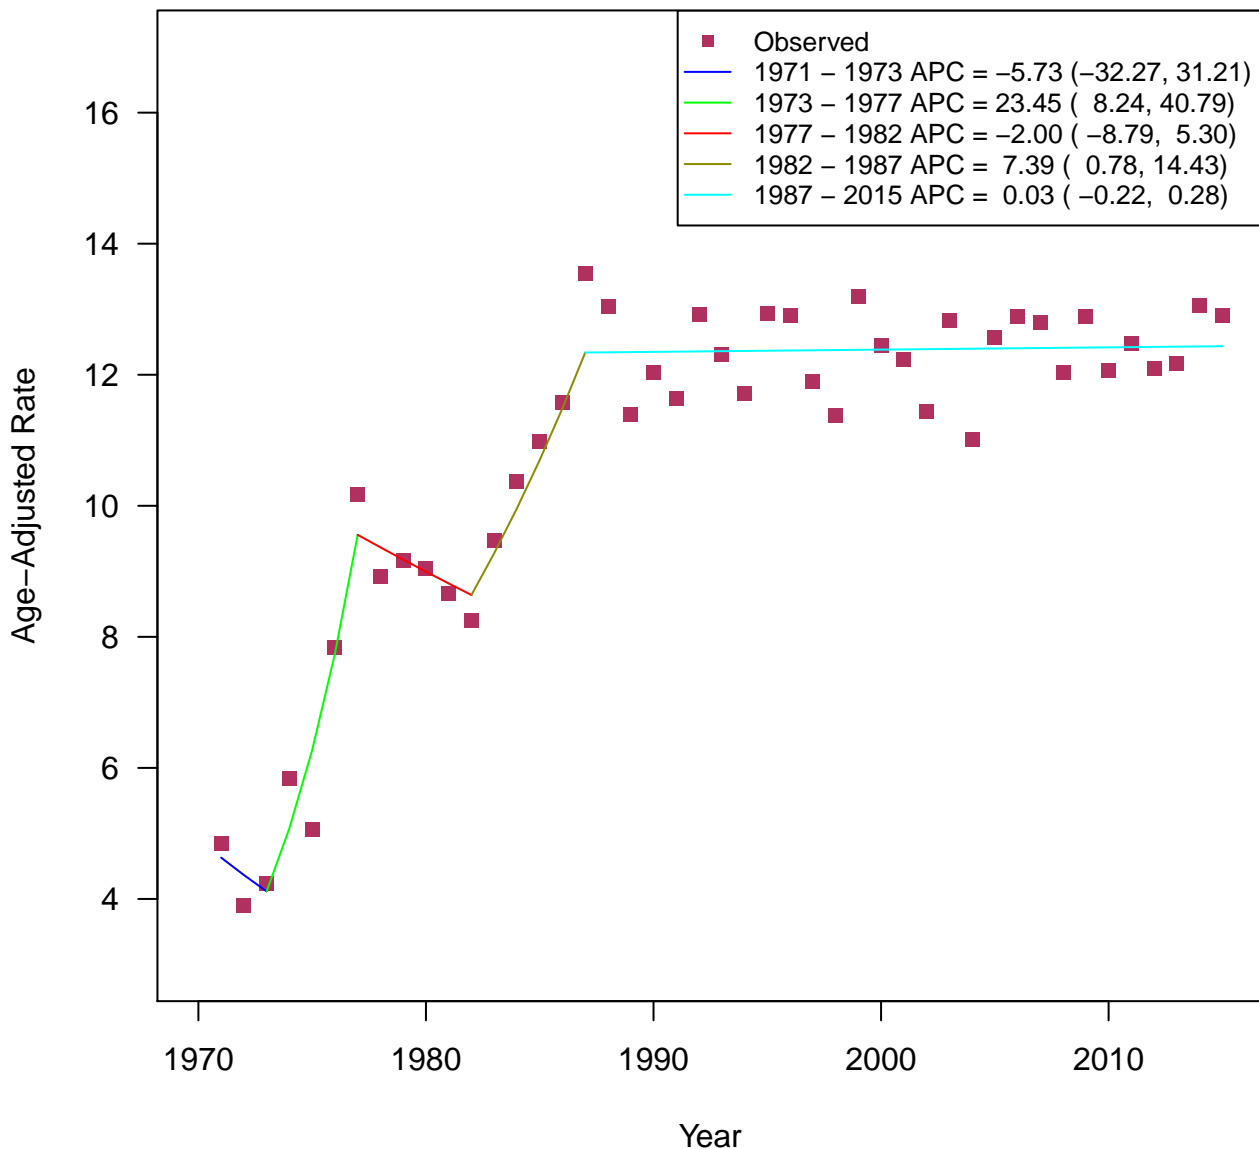

**Figure 352. Age-adjusted incidence rates of skin melanoma in males aged 50–59 years in Canada, 1971–2015**

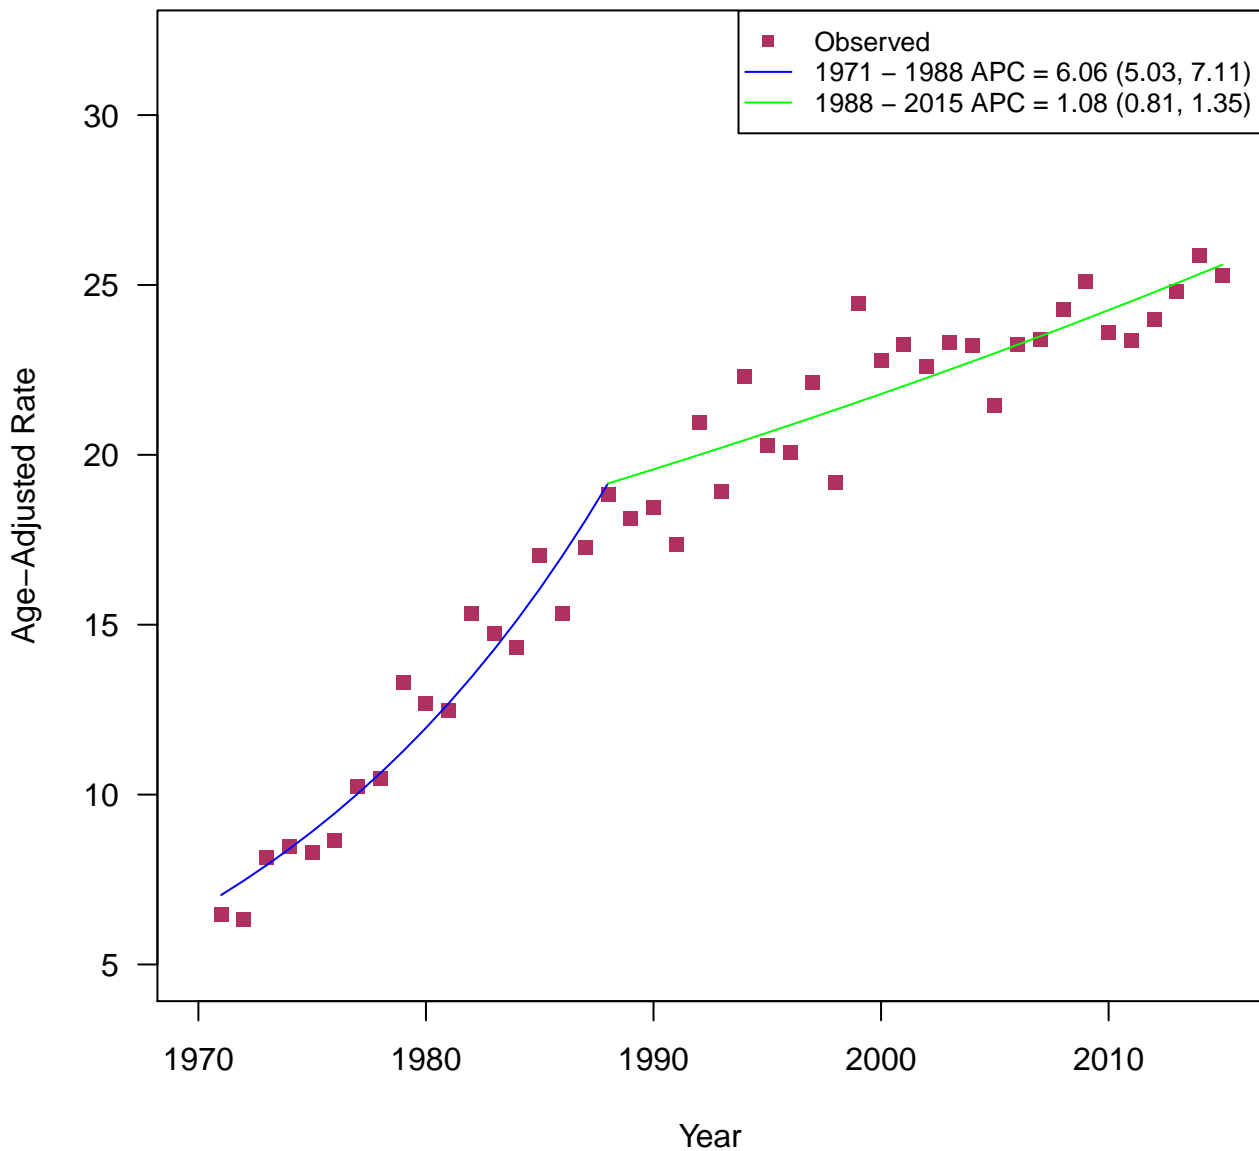

**Figure 353. Age-adjusted incidence rates of skin melanoma in males aged 60–69 years in Canada, 1971–2015**

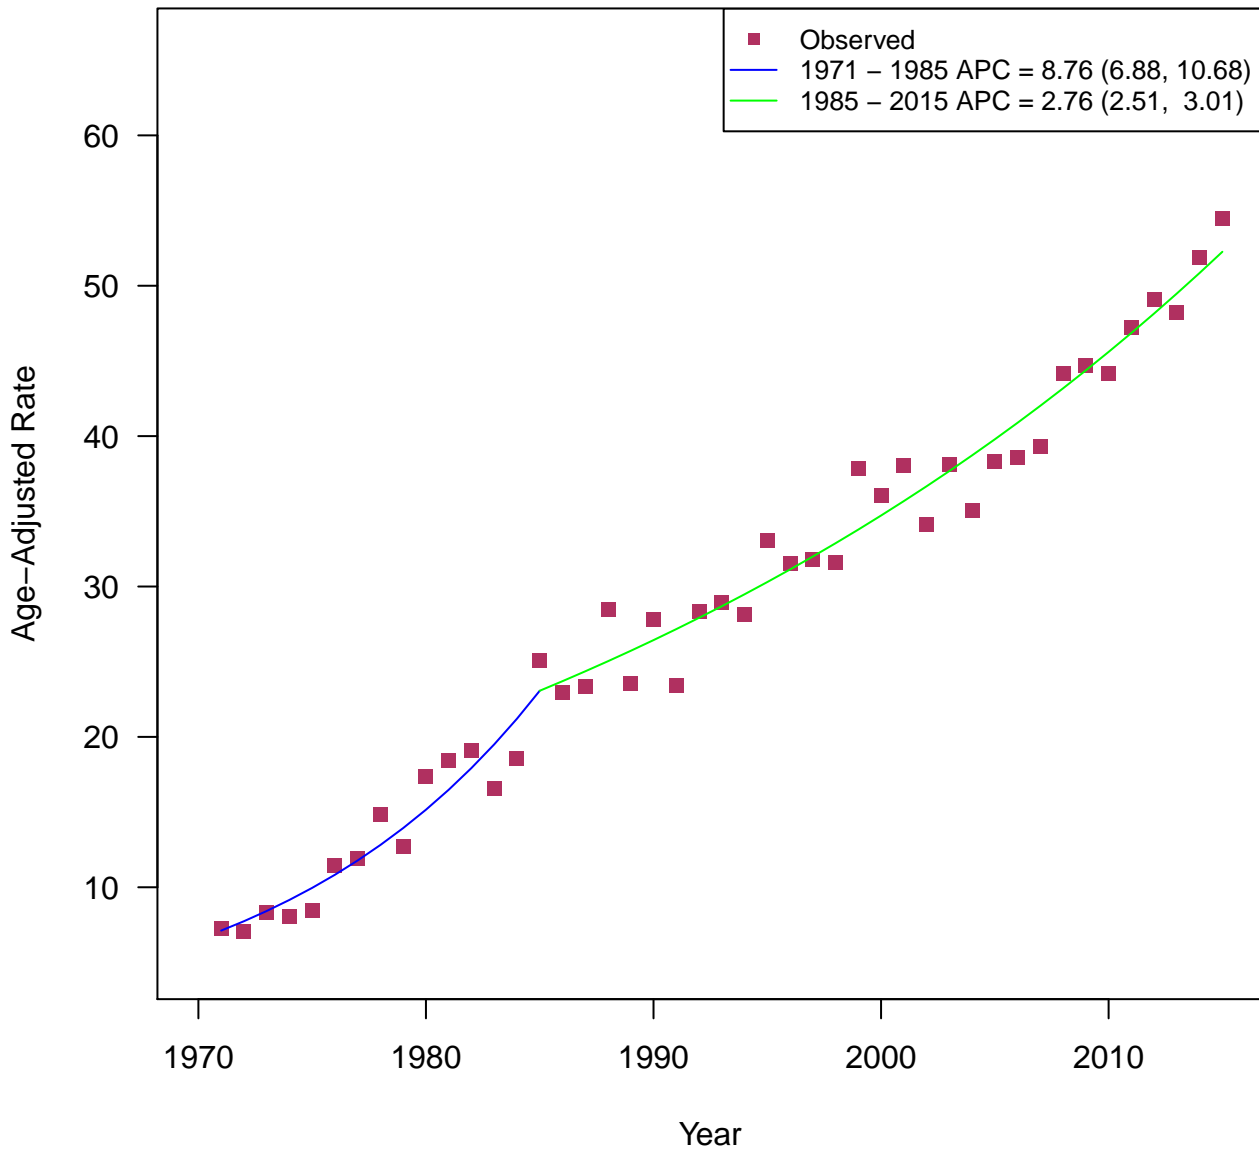

**Figure 354. Age-adjusted incidence rates of skin melanoma in males aged 70–79 years in Canada, 1971–2015**

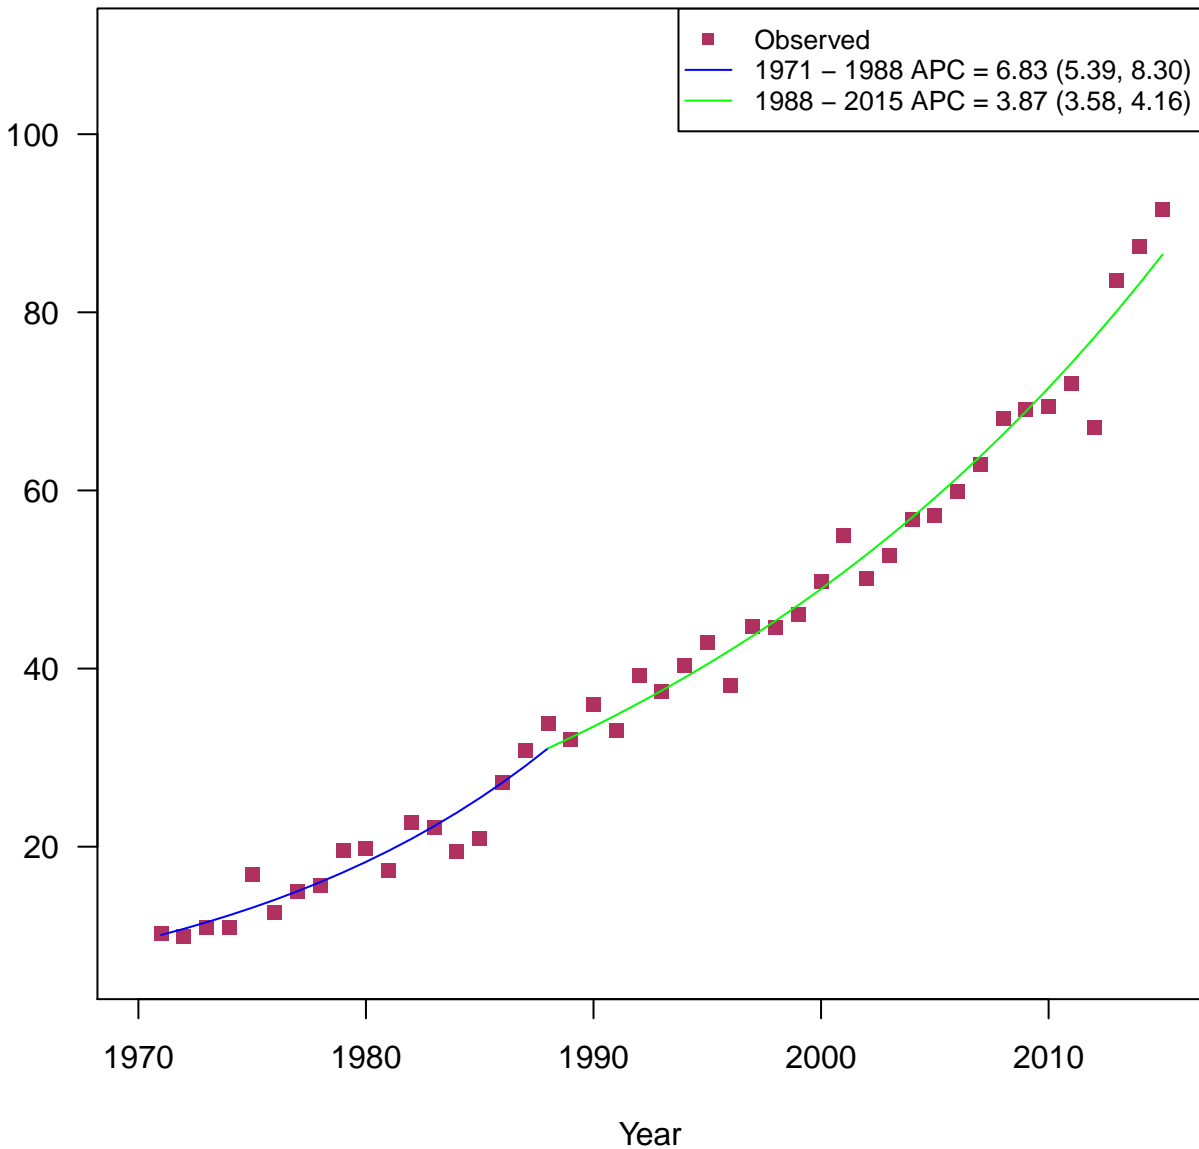

**Figure 355. Age-adjusted incidence rates of skin melanoma in males aged 80–89 years in Canada, 1971–2015**

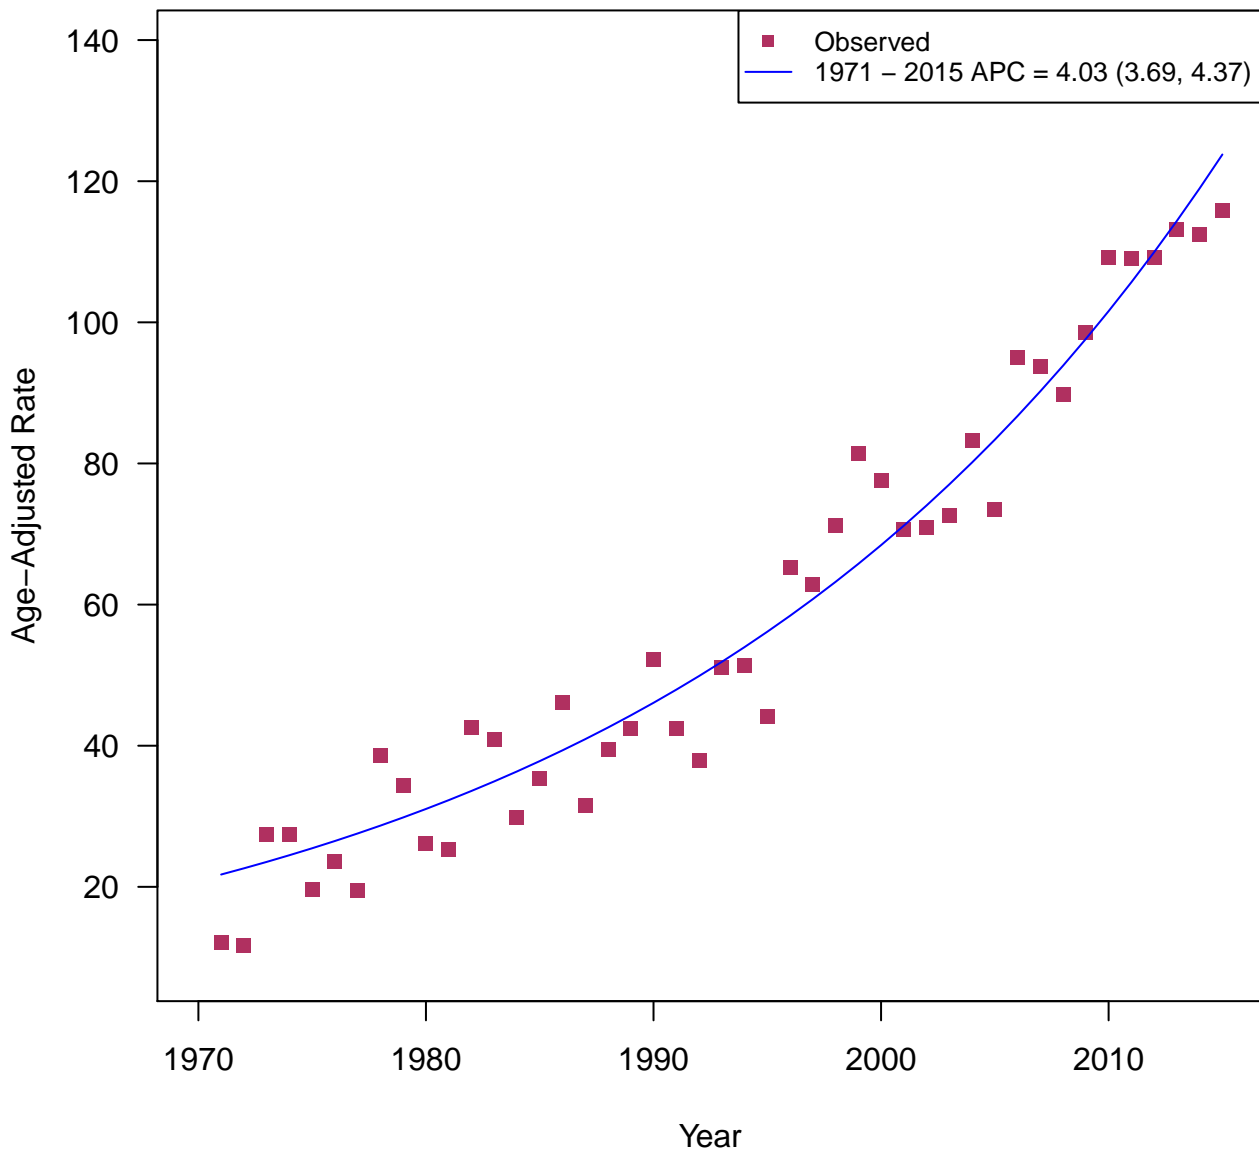



**Figure 356. Age-adjusted incidence rates of skin melanoma in females aged 20–29 years in Canada, 1971–2015**

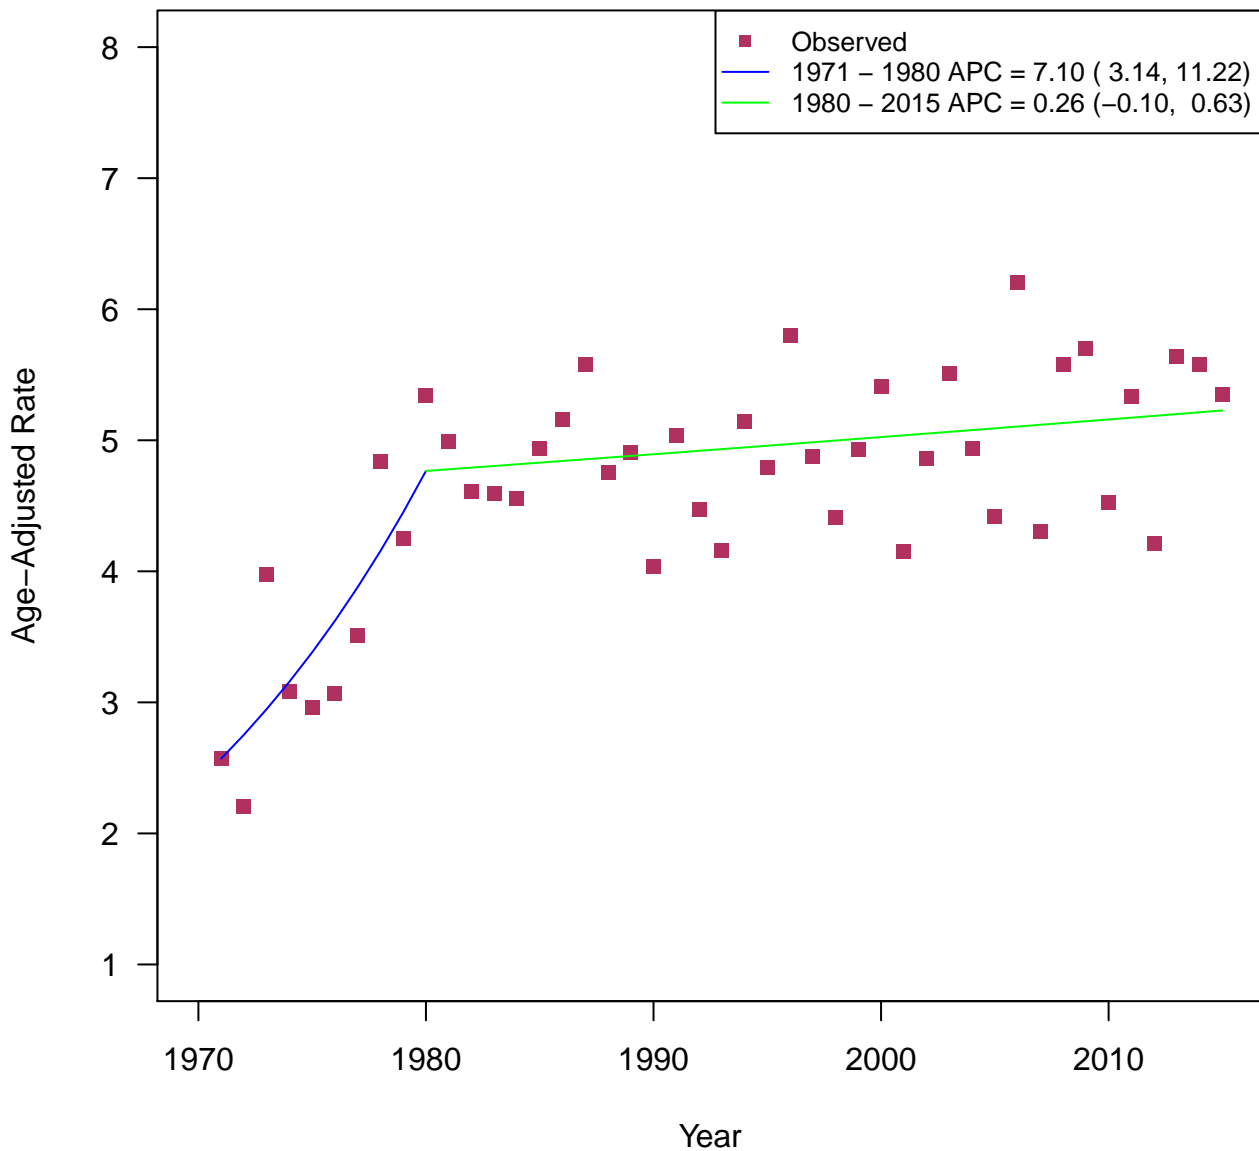

**Figure 357. Age-adjusted incidence rates of skin melanoma in females aged 20–39 years in Canada, 1971–2015**

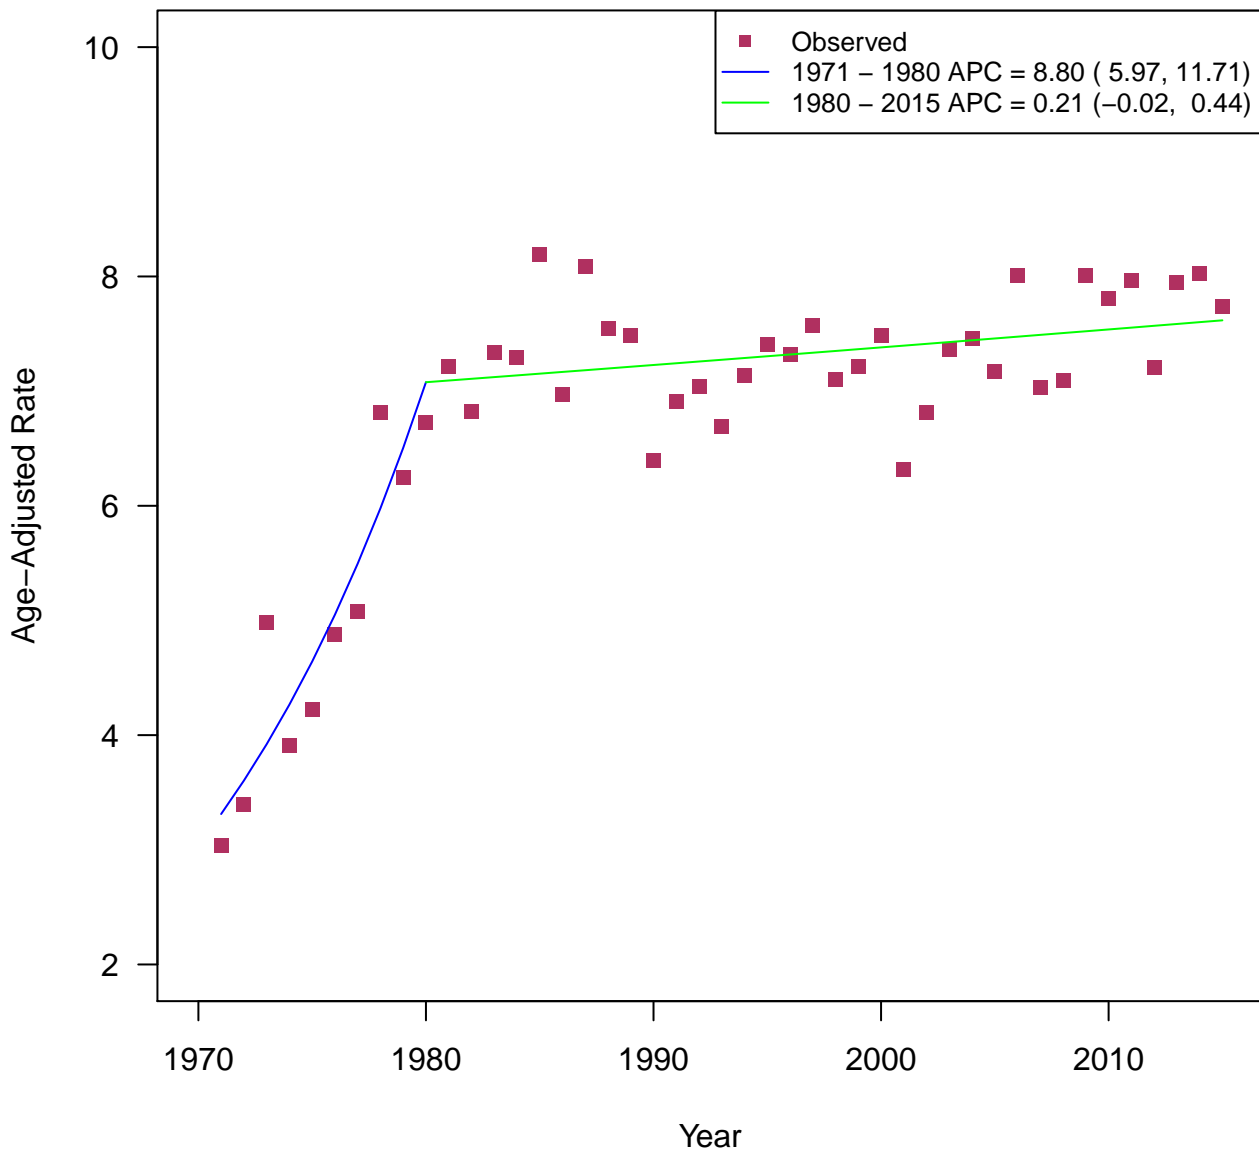

**Figure 358. Age-adjusted incidence rates of skin melanoma in females aged 30–39 years in Canada, 1971–2015**

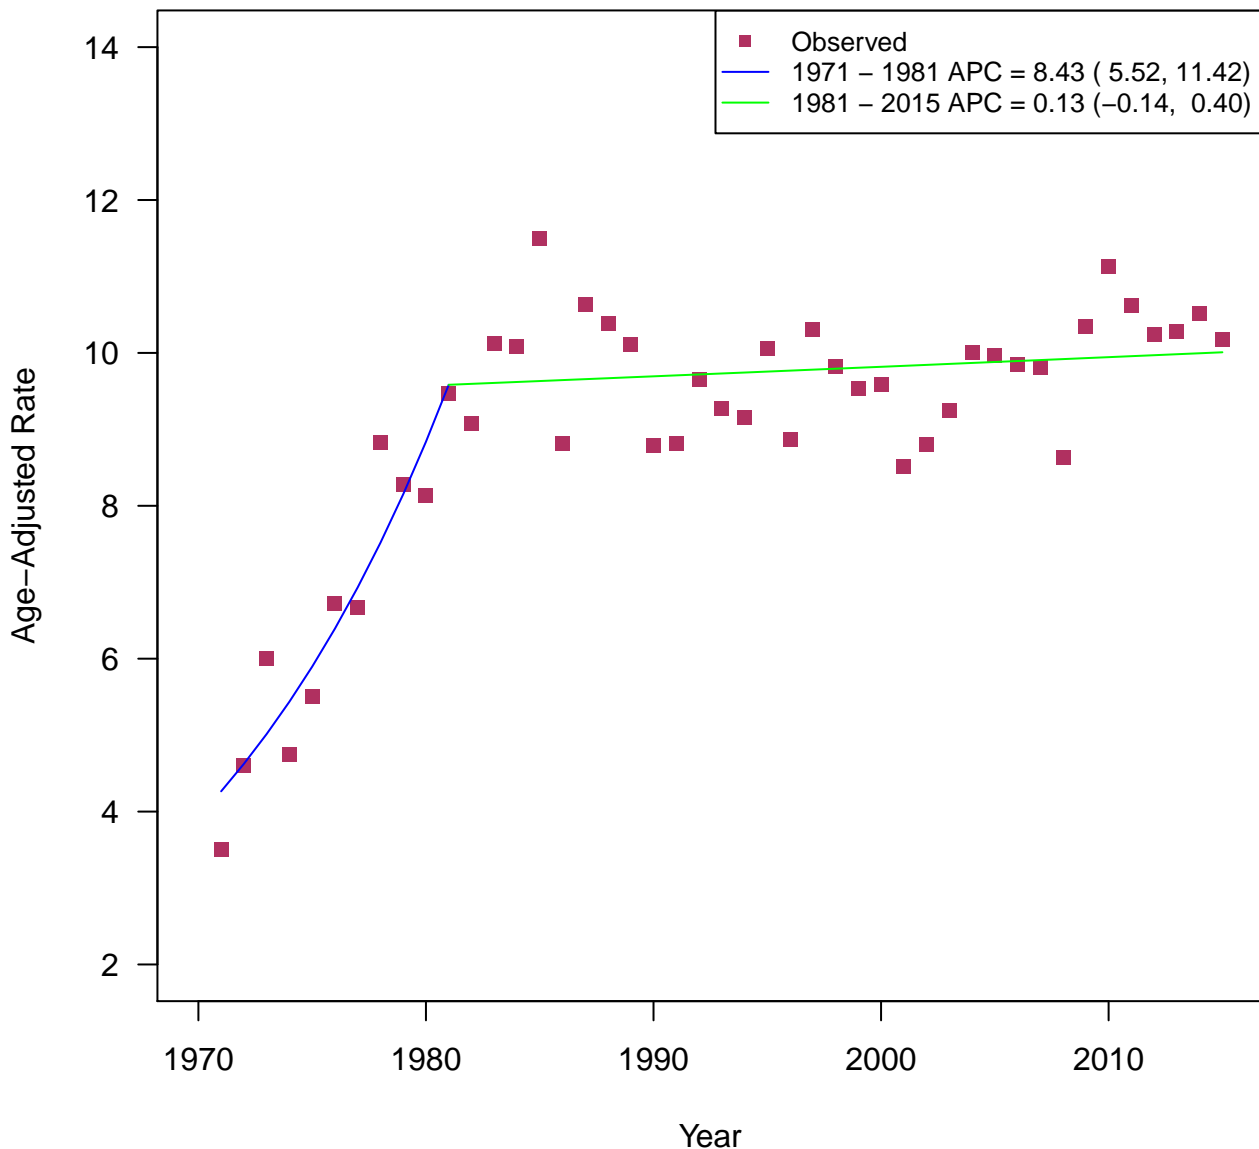

**Figure 359. Age-adjusted incidence rates of skin melanoma in females aged 40–49 years in Canada, 1971–2015**

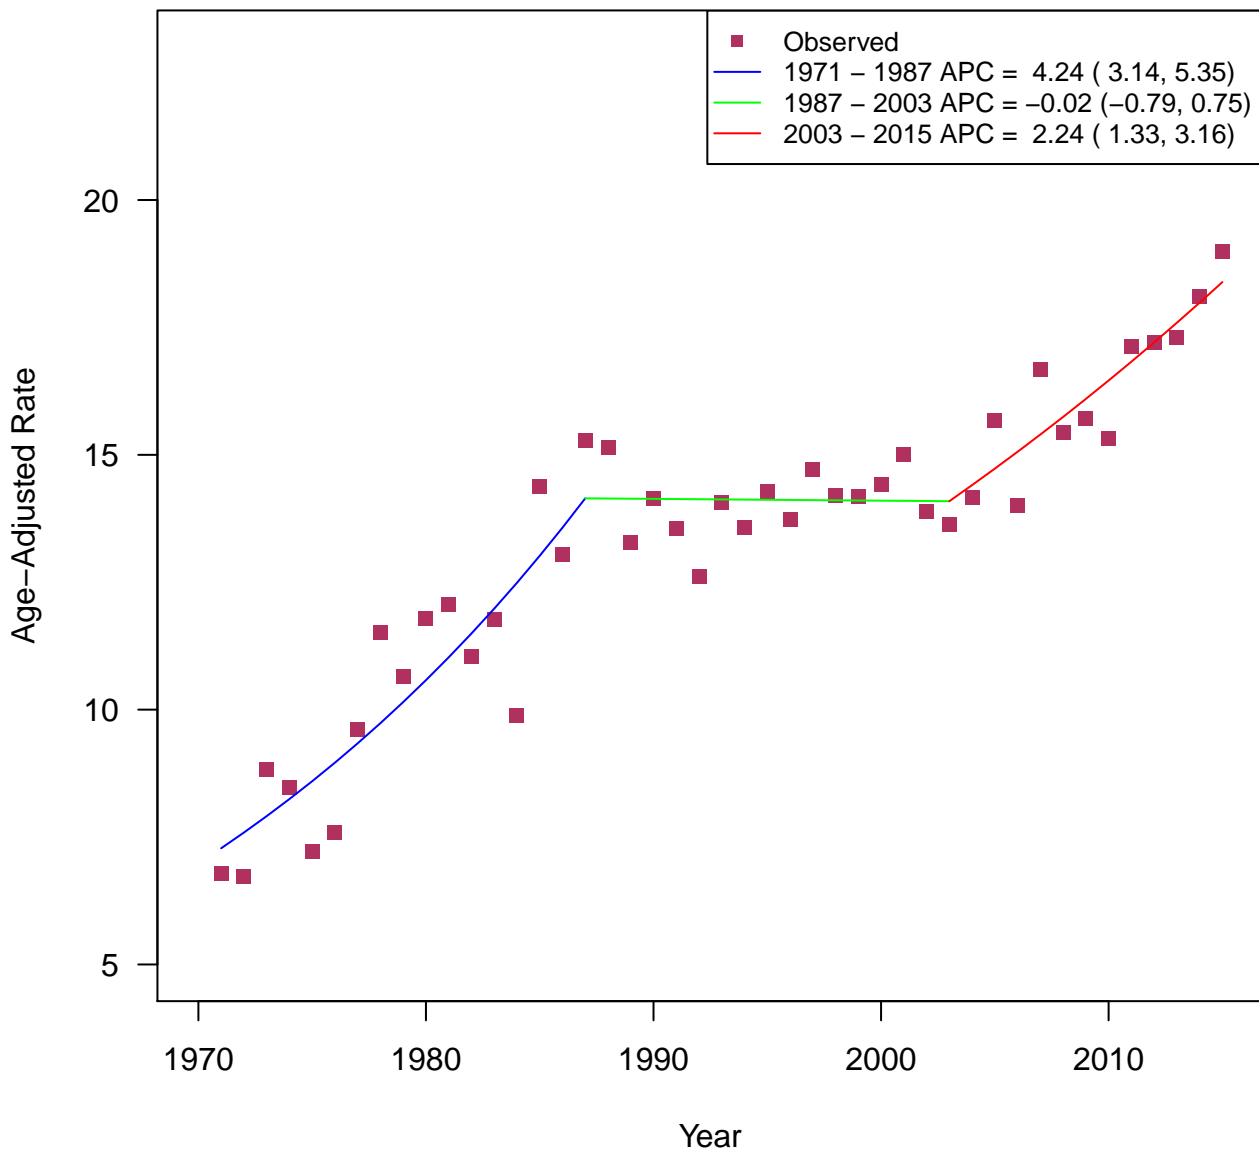

**Figure 360. Age-adjusted incidence rates of skin melanoma in females aged 50–59 years in Canada, 1971–2015**

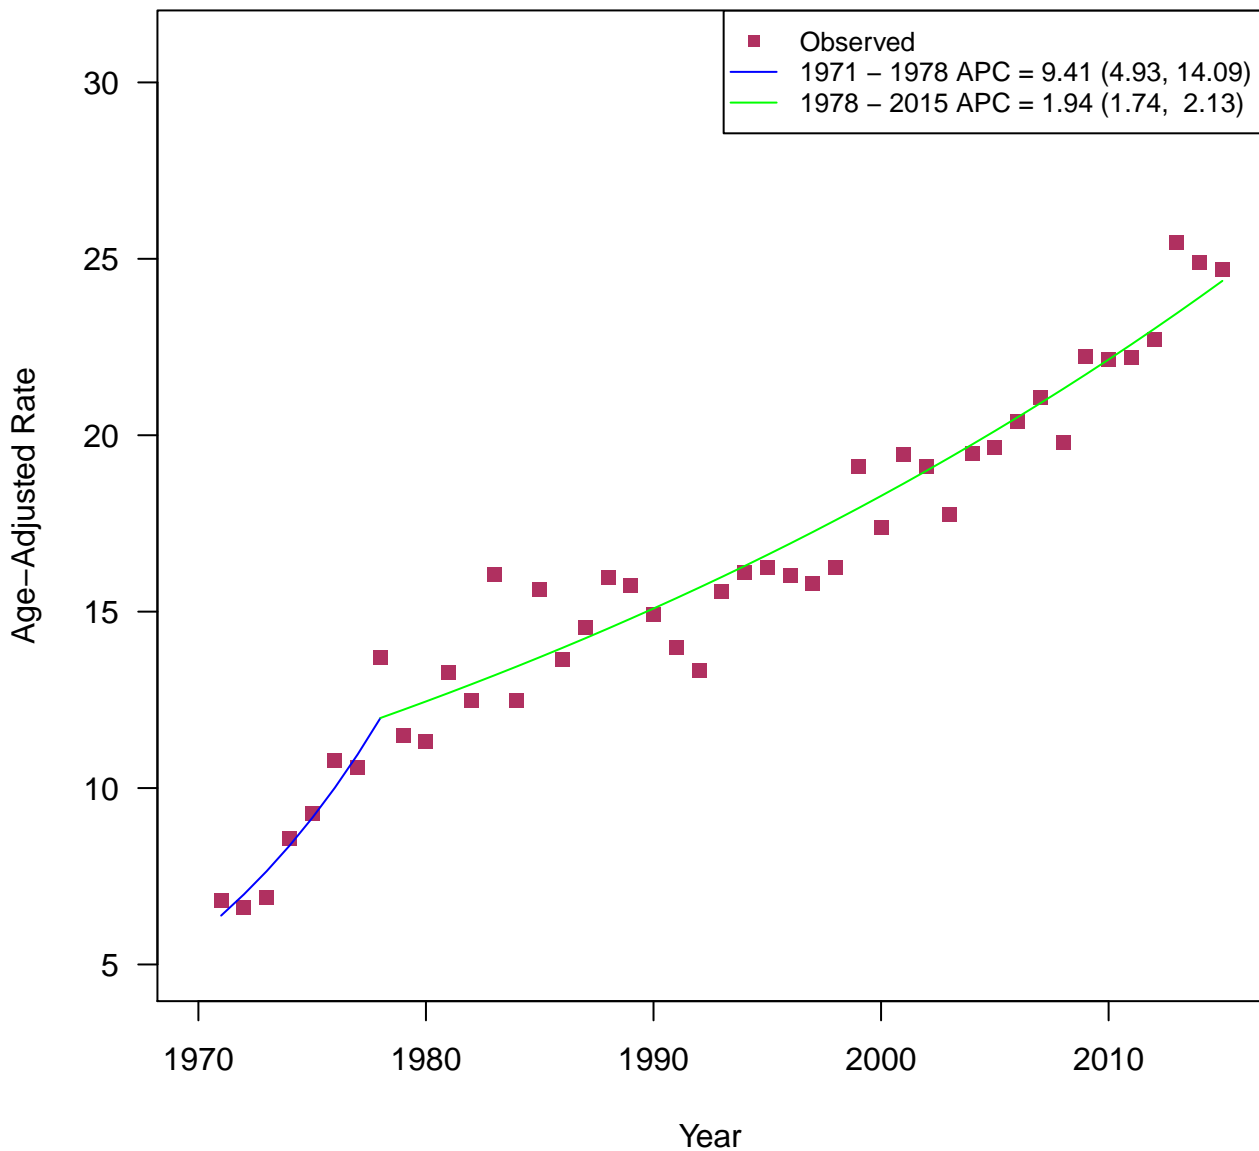

**Figure 361. Age-adjusted incidence rates of skin melanoma in females aged 60–69 years in Canada, 1971–2015**

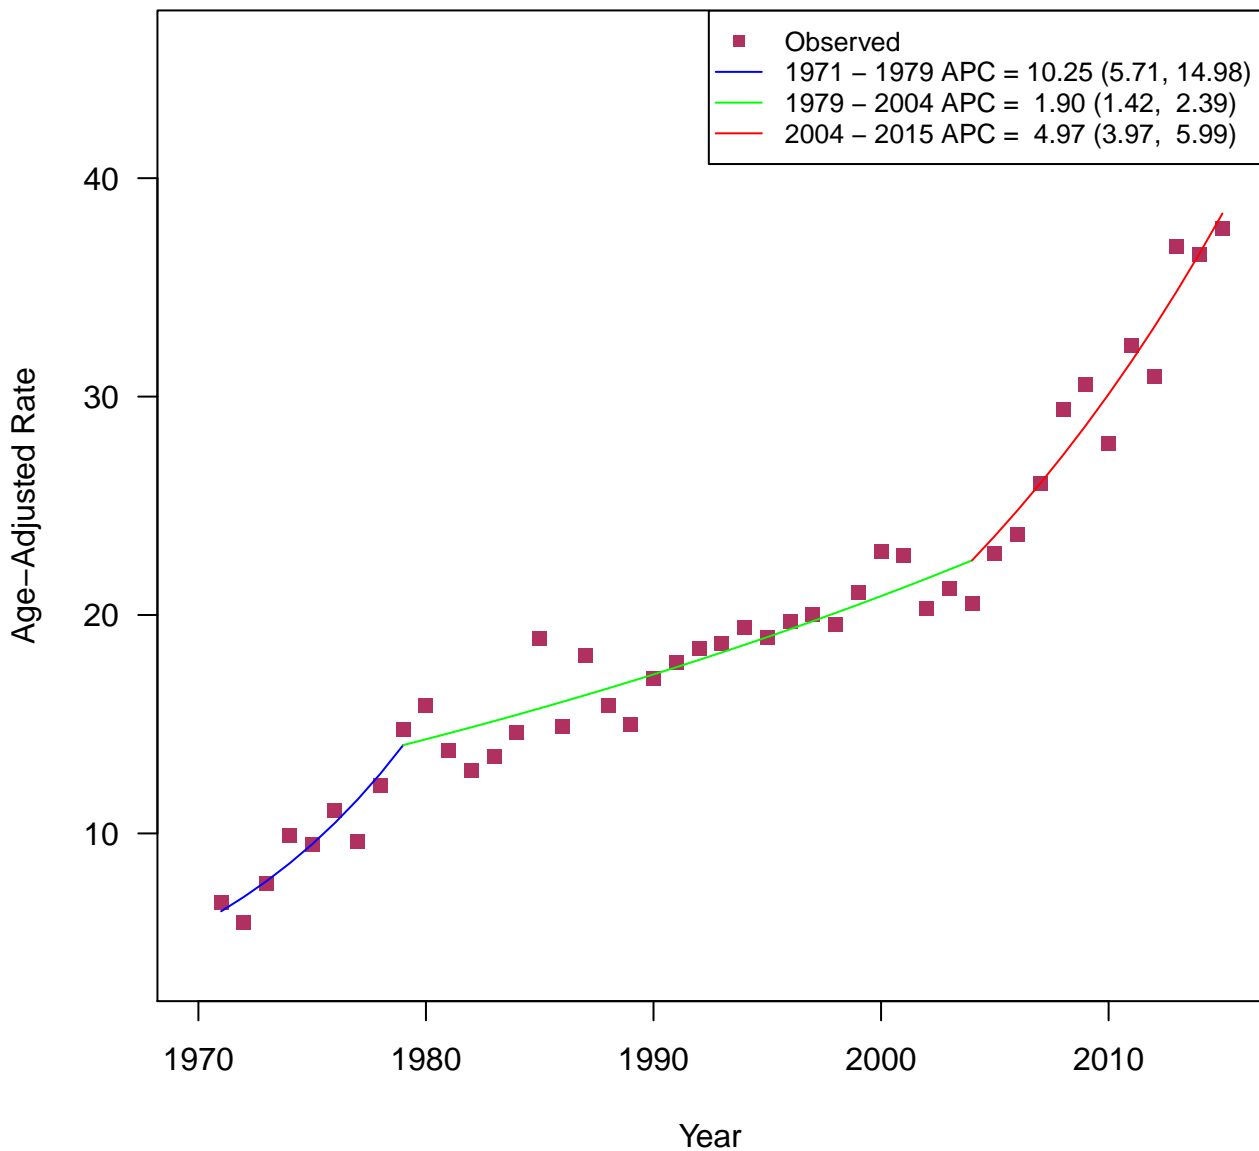

**Figure 362. Age-adjusted incidence rates of skin melanoma in females aged 70–79 years in Canada, 1971–2015**

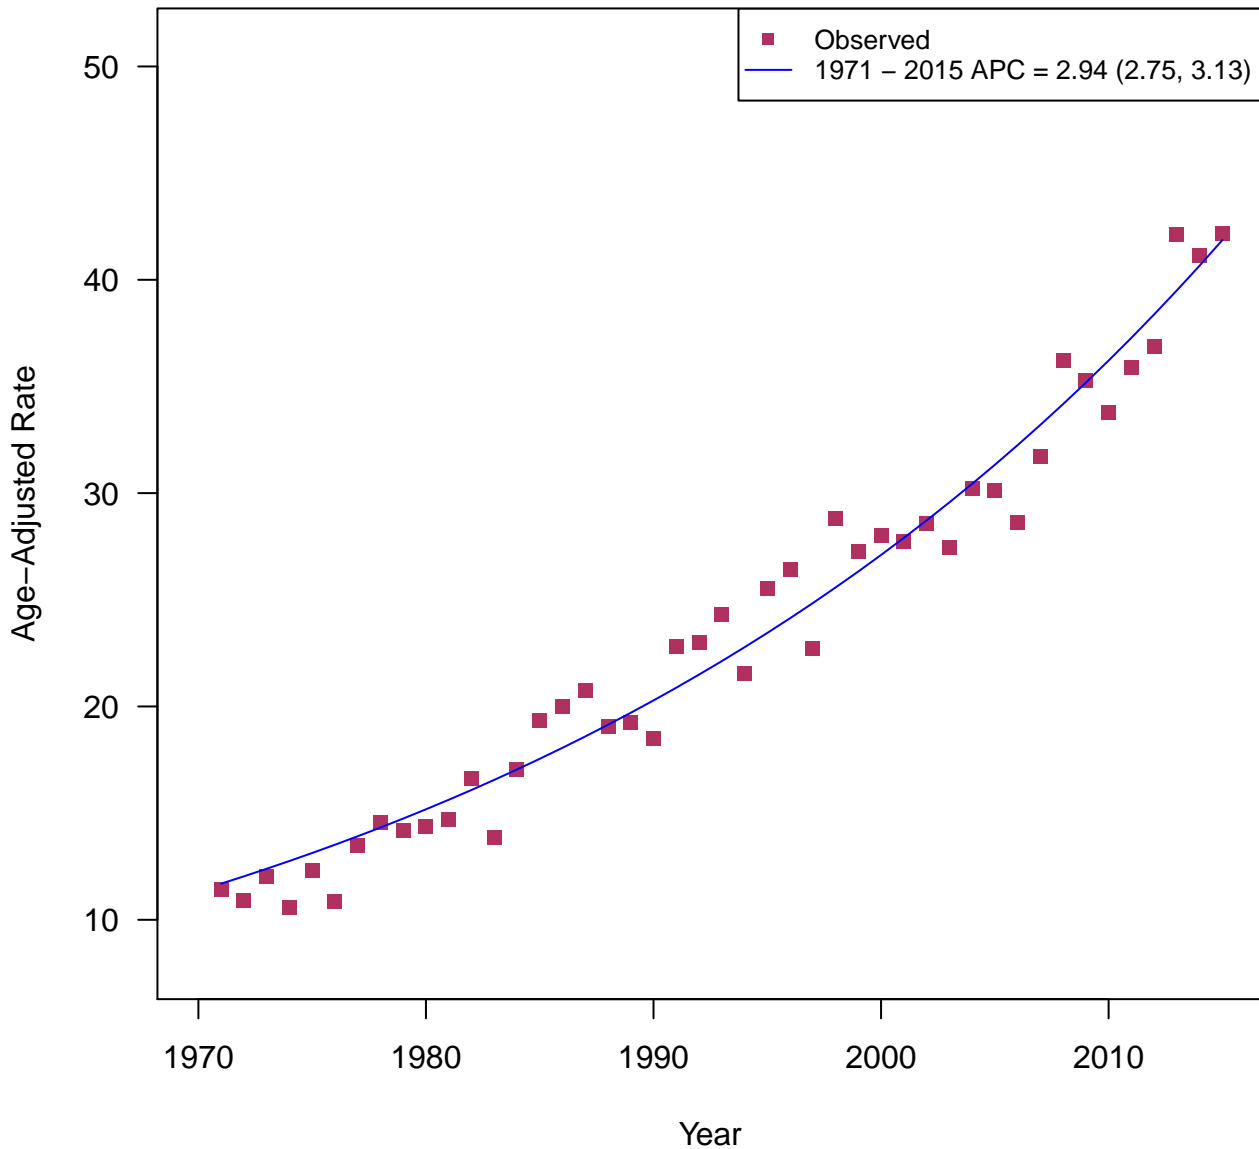

**Figure 363. Age-adjusted incidence rates of skin melanoma in females aged 80–89 years in Canada, 1971–2015**

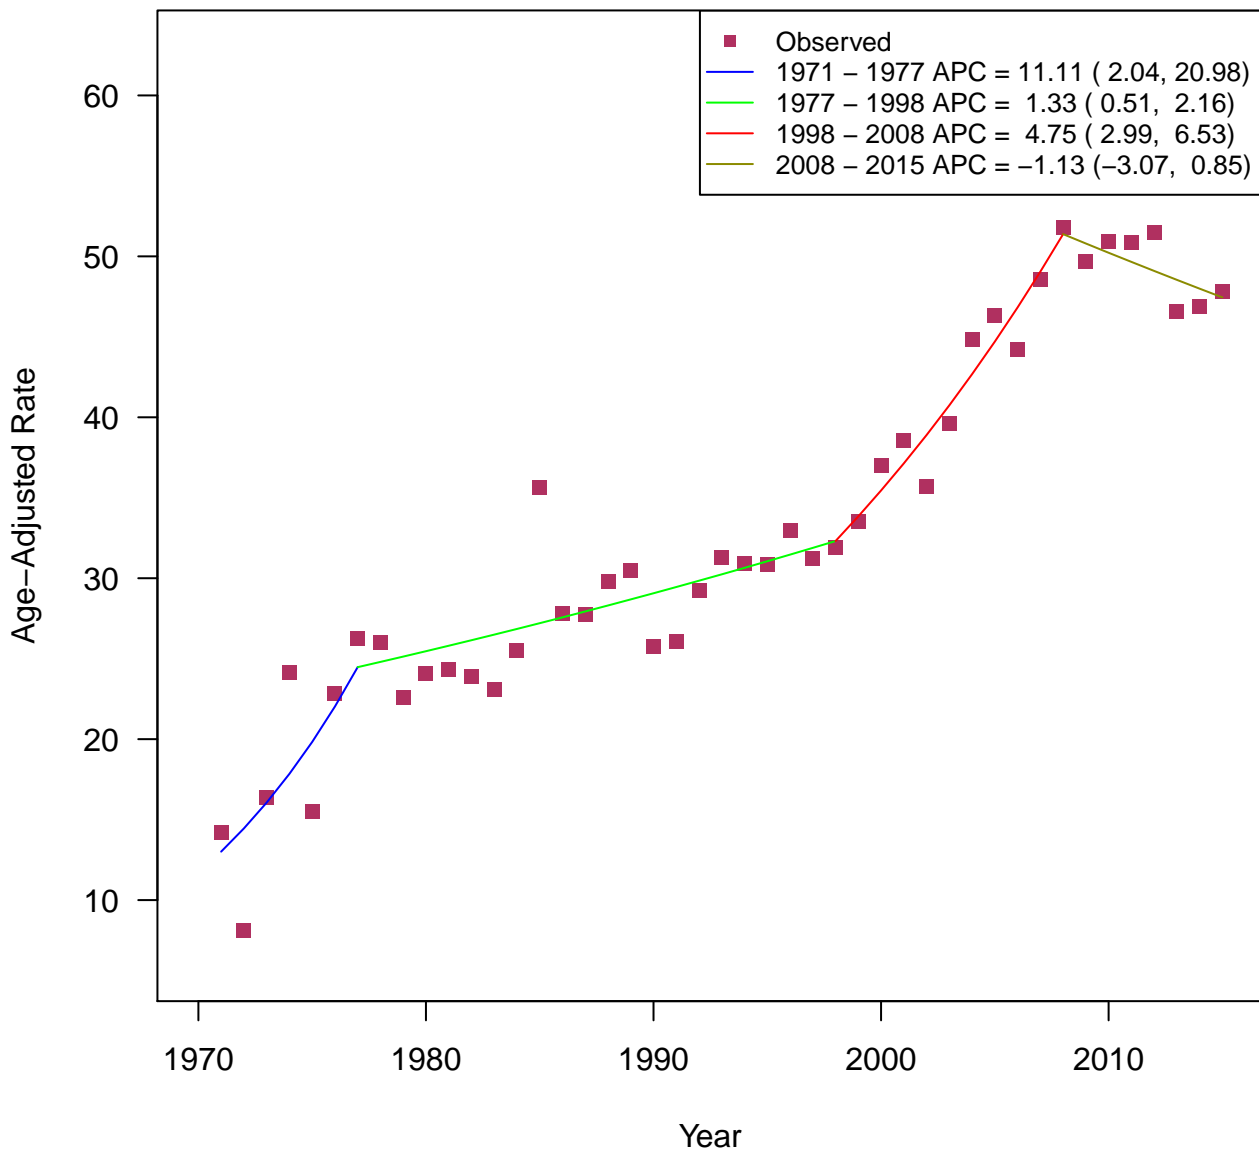



**Figure 364. Age-adjusted incidence rates of stomach cancer in males aged 20–29 years in Canada, 1971–2015**

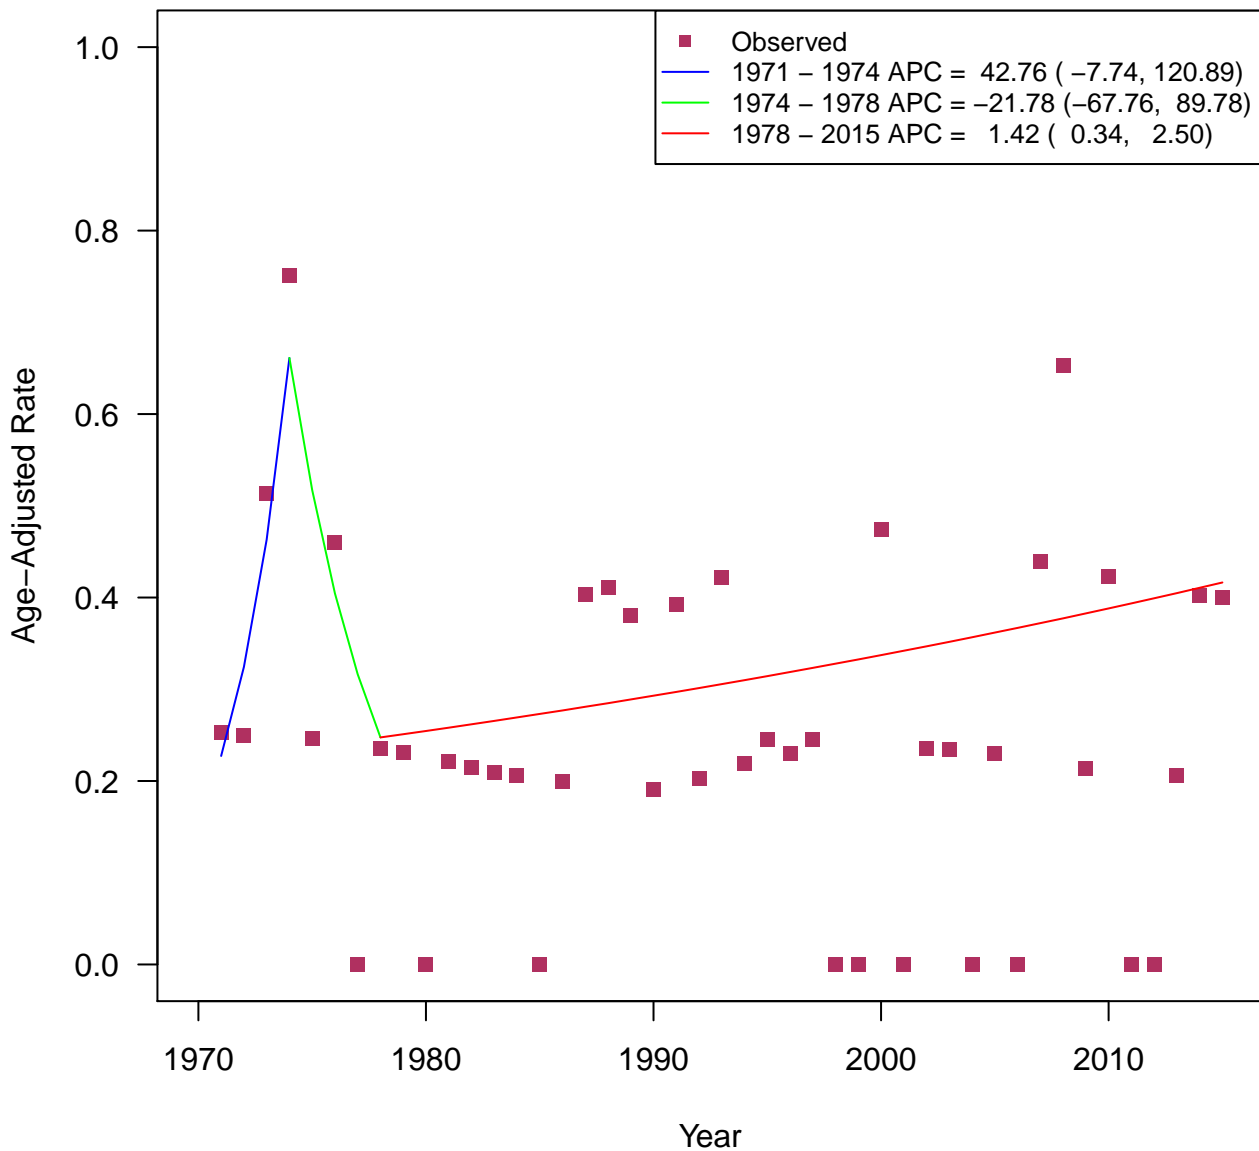

**Figure 365. Age-adjusted incidence rates of stomach cancer in males aged 20–39 years in Canada, 1971–2015**

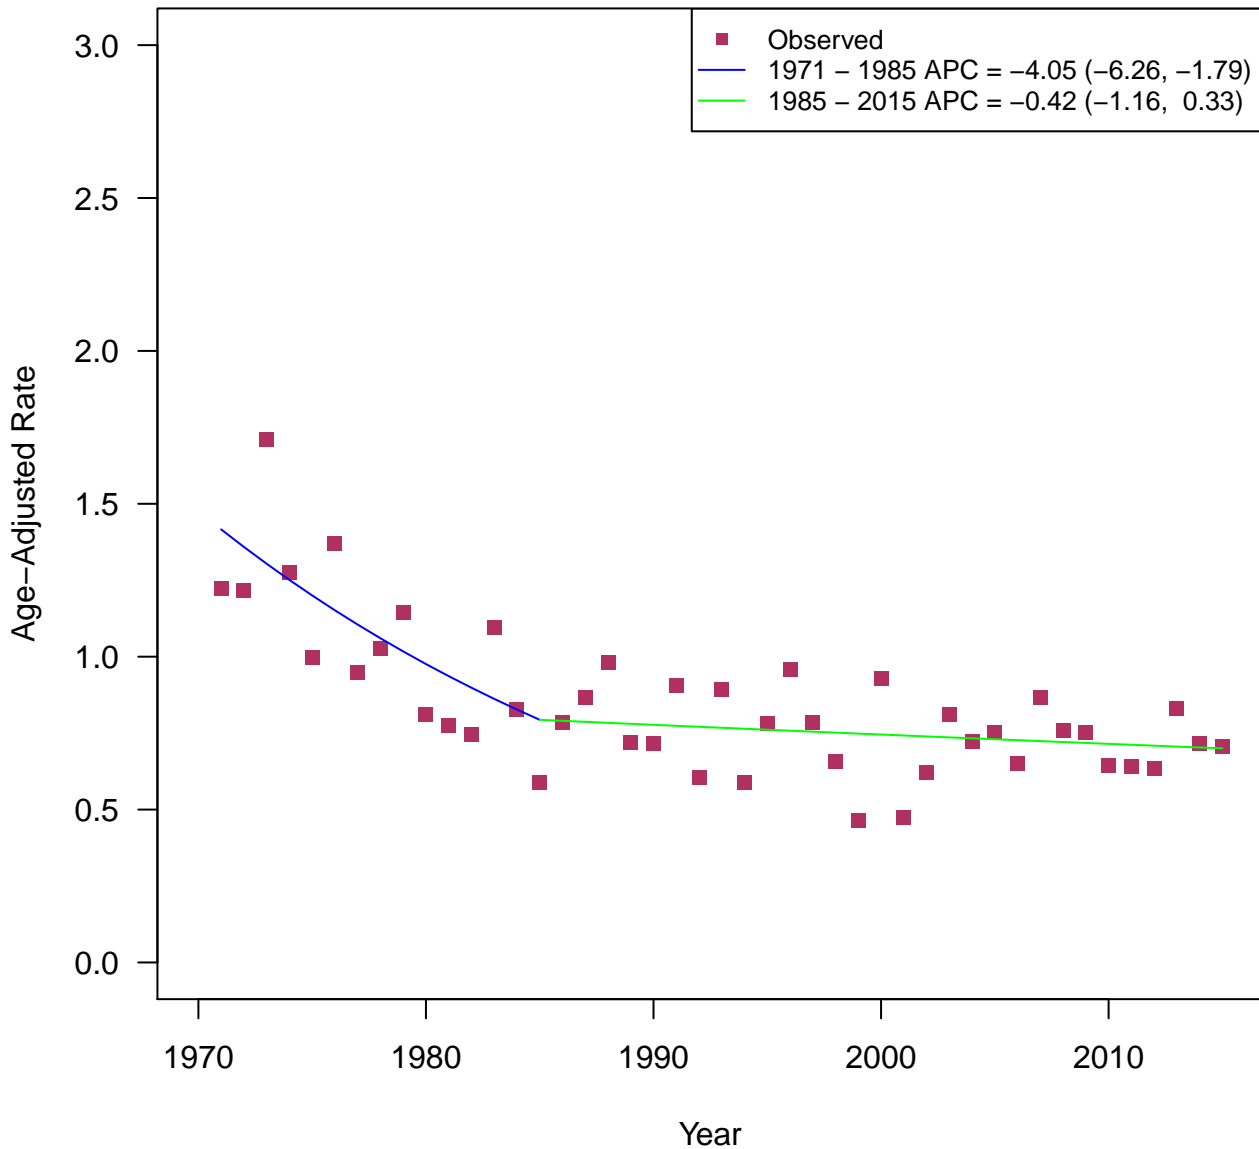

**Figure 366. Age-adjusted incidence rates of stomach cancer in males aged 20–49 years in Canada, 1971–2015**

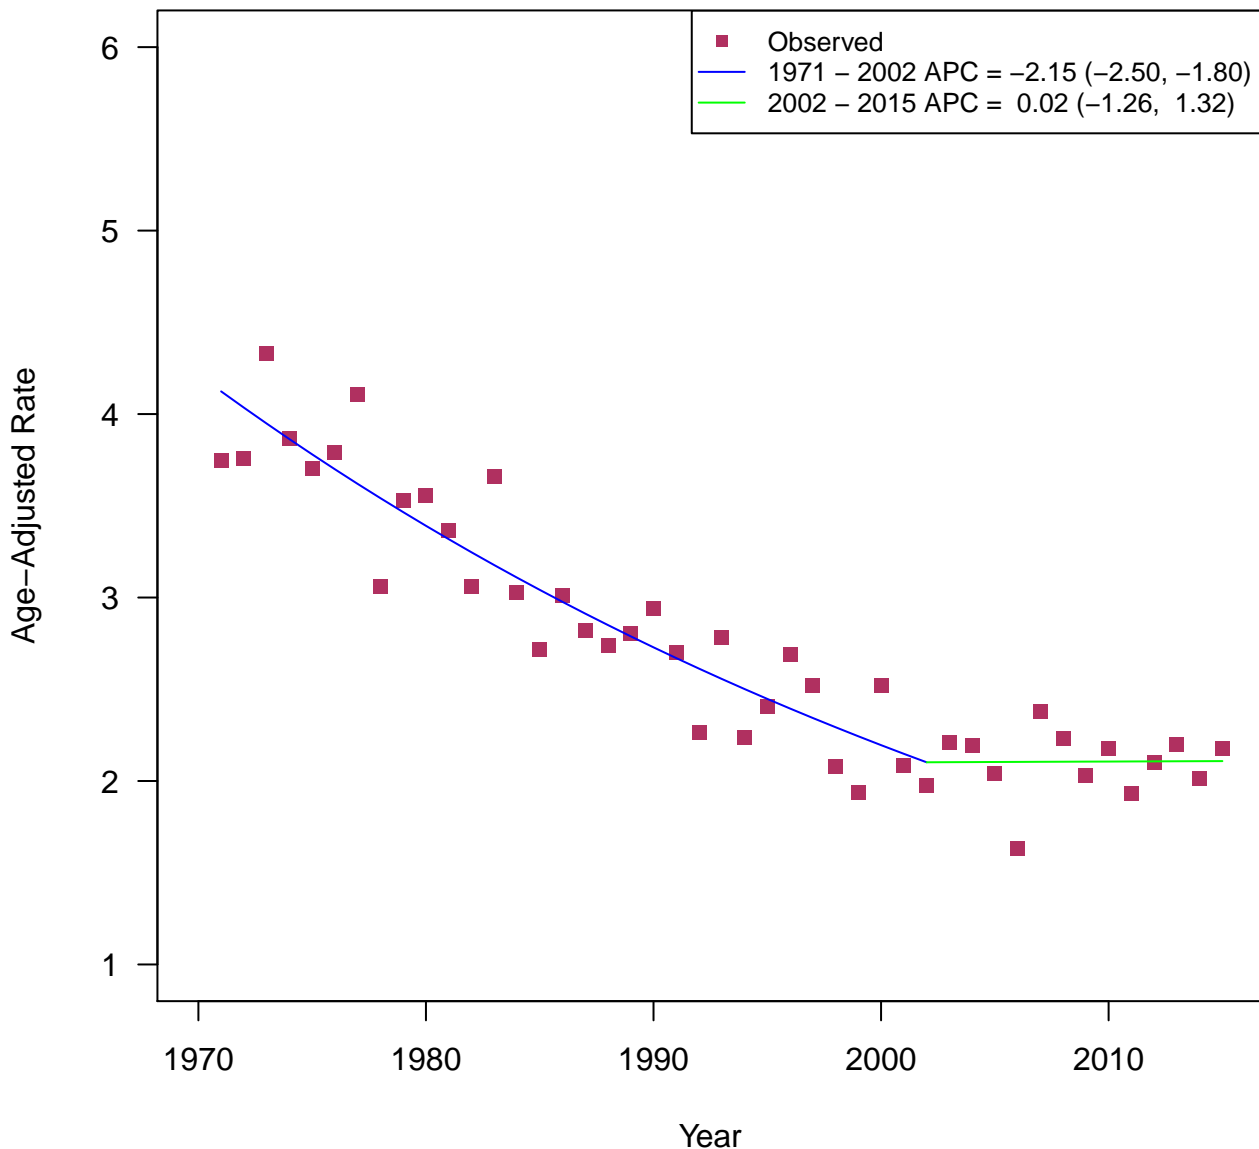

**Figure 367. Age-adjusted incidence rates of stomach cancer in males aged 30–39 years in Canada, 1971–2015**

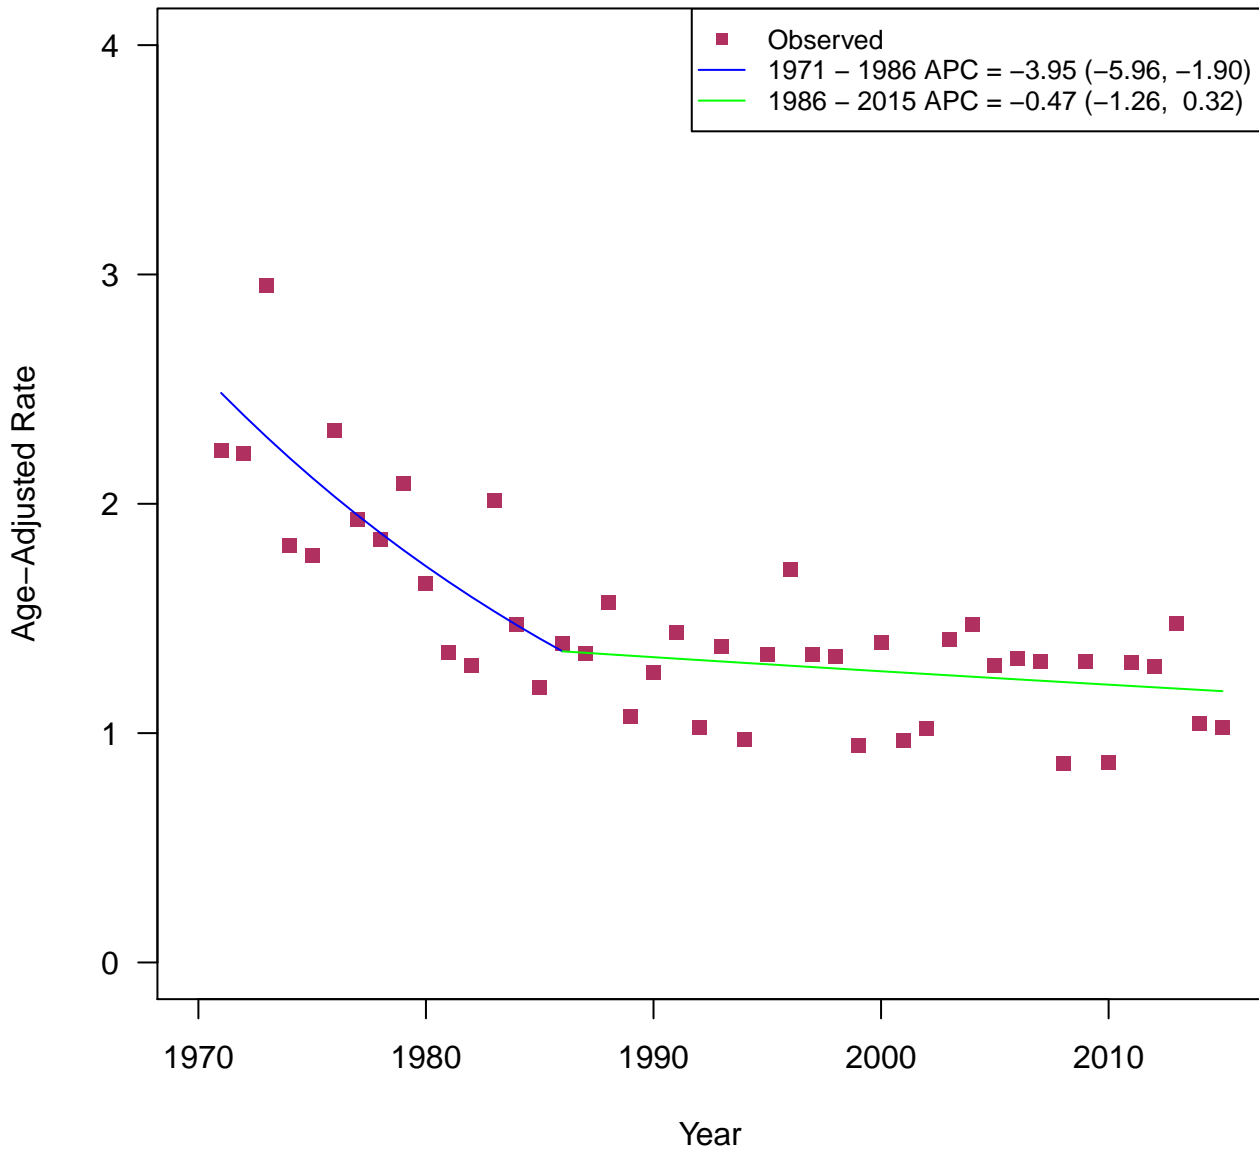

**Figure 368. Age-adjusted incidence rates of stomach cancer in males aged 40–49 years in Canada, 1971–2015**

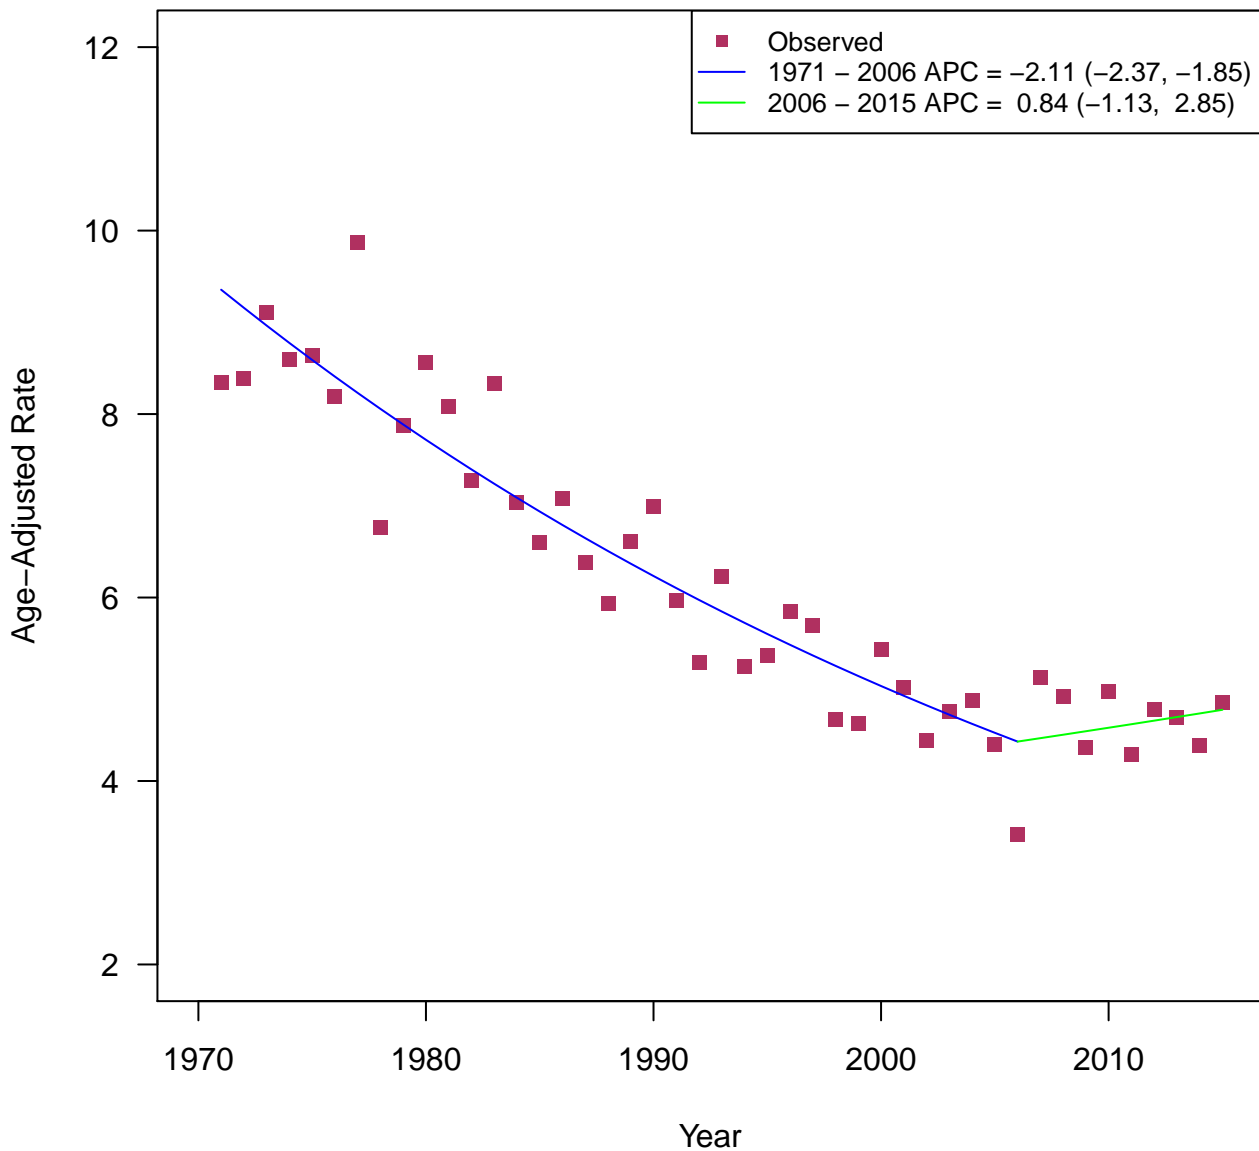

**Figure 369. Age-adjusted incidence rates of stomach cancer in males aged 50–59 years in Canada, 1971–2015**

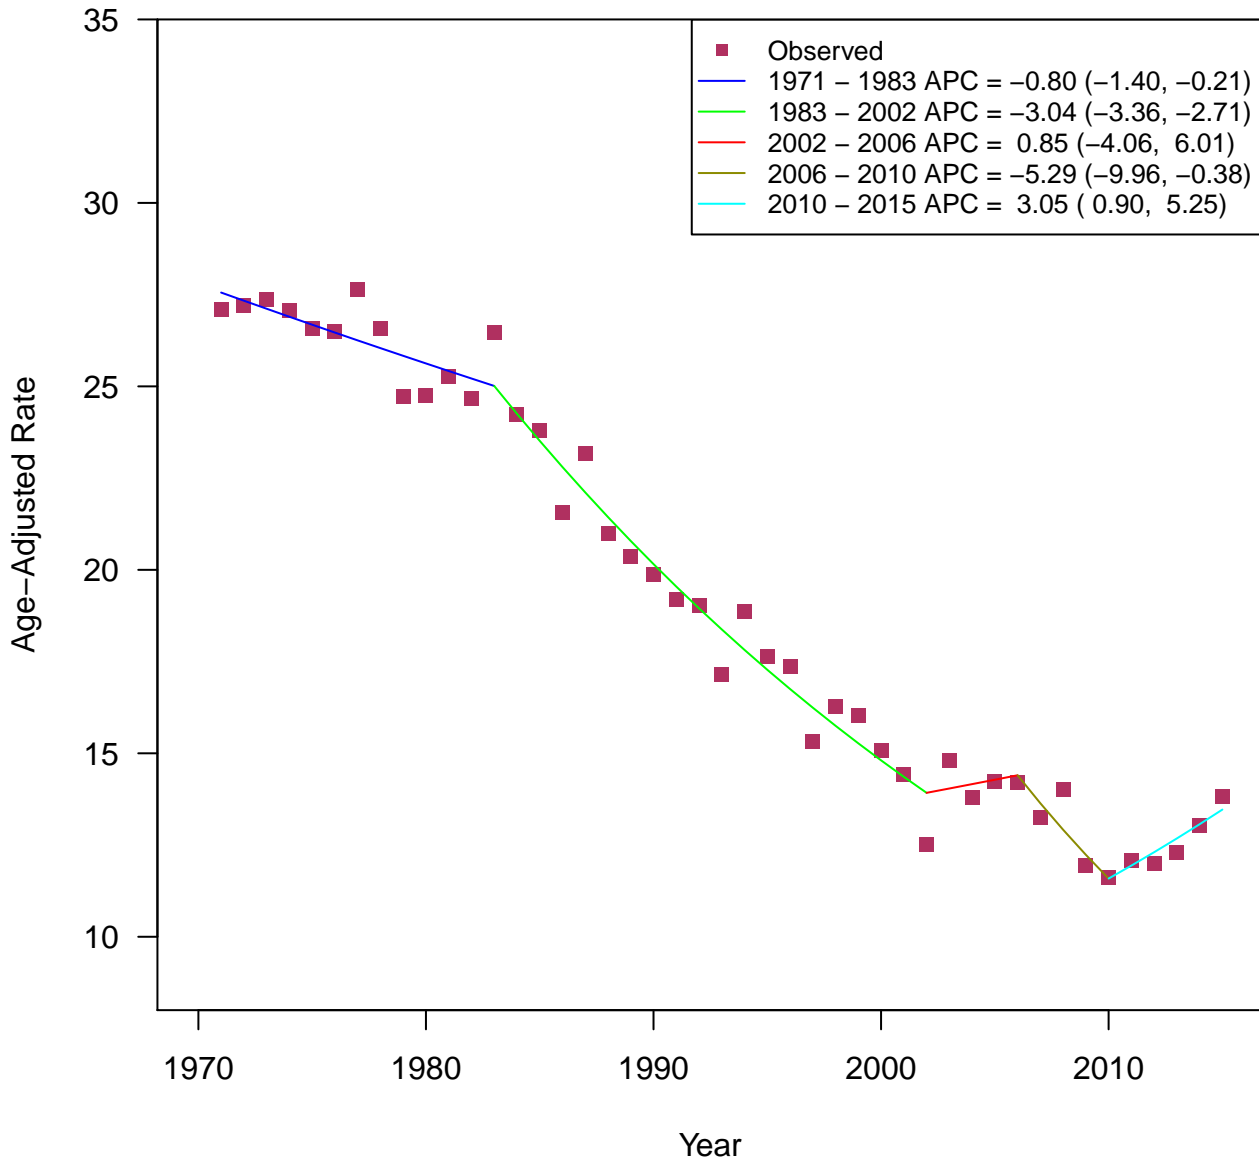

**Figure 370. Age-adjusted incidence rates of stomach cancer in males aged 60–69 years in Canada, 1971–2015**

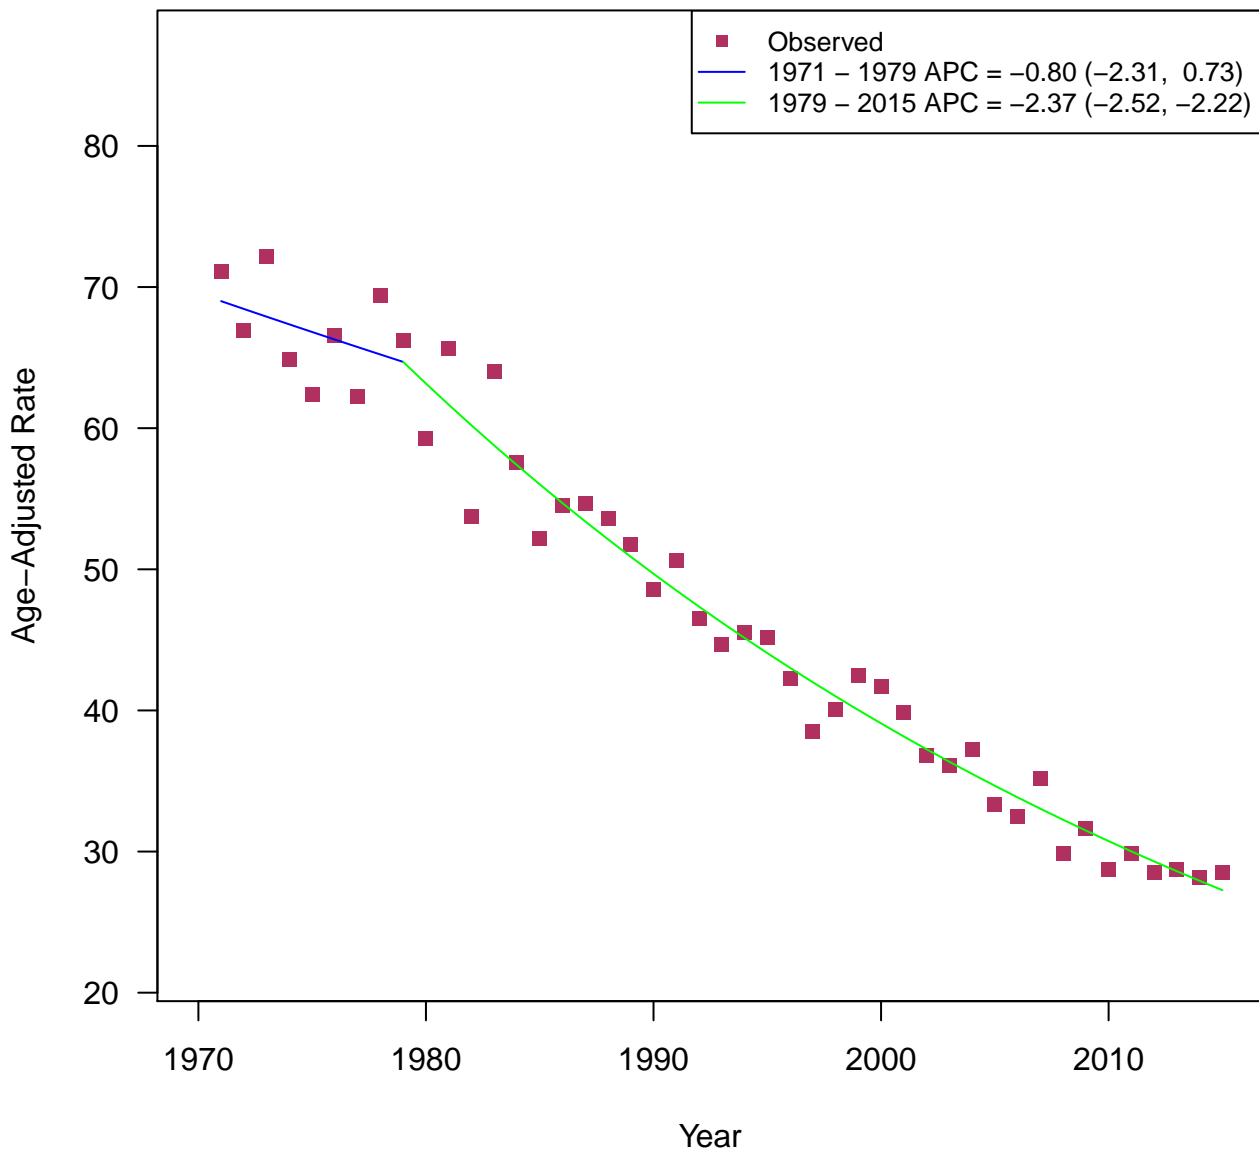

**Figure 371. Age-adjusted incidence rates of stomach cancer in males aged 70–79 years in Canada, 1971–2015**

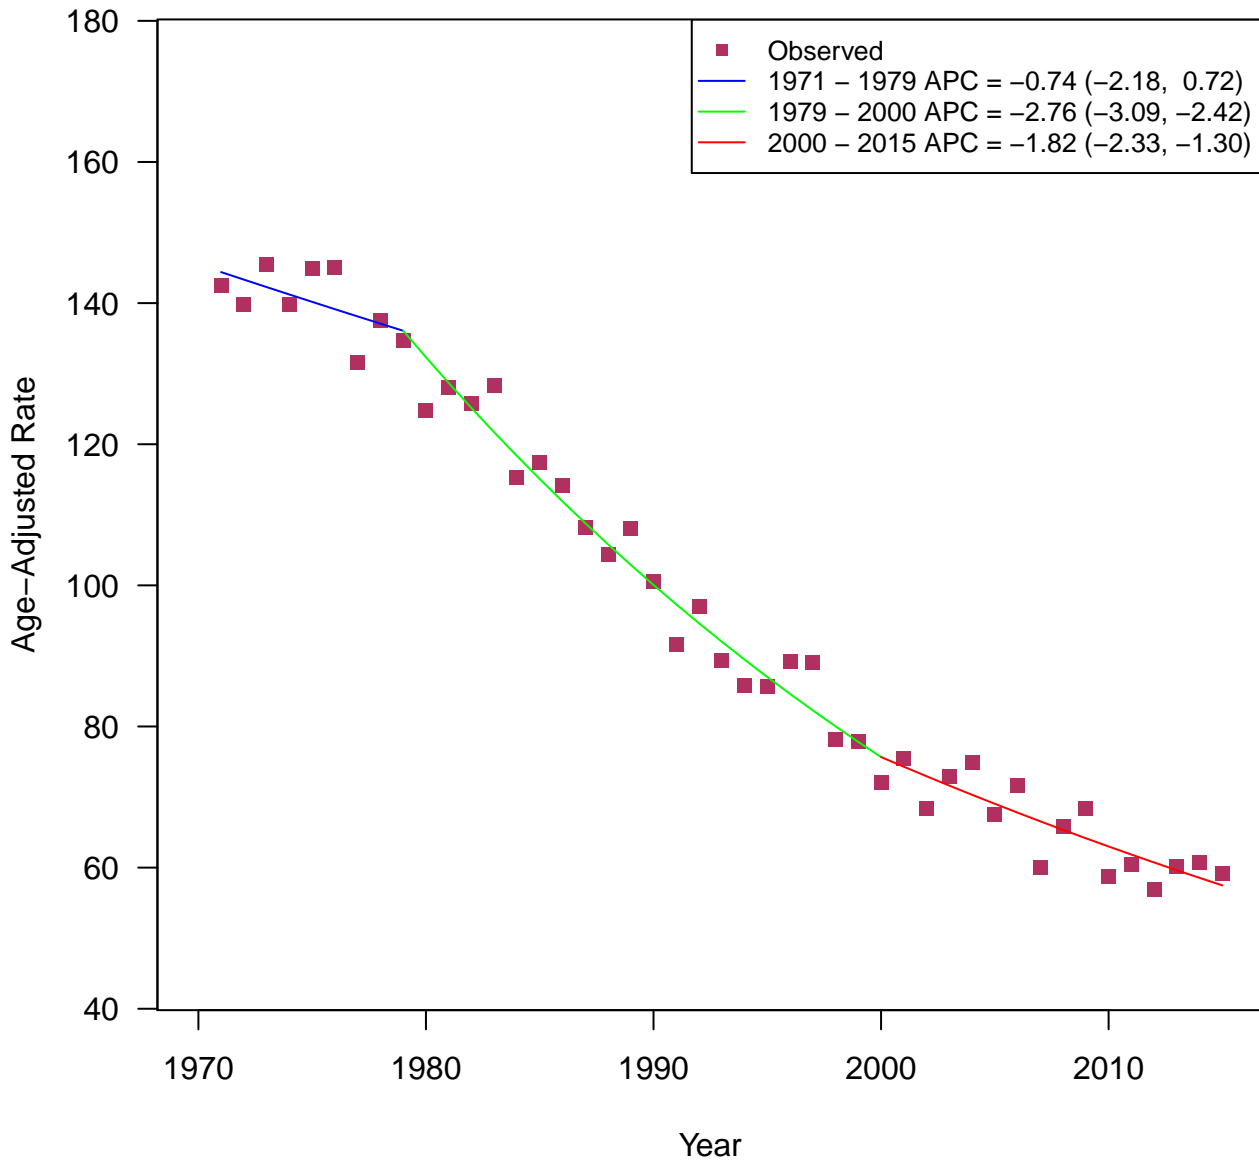



**Figure 372. Age-adjusted incidence rates of stomach cancer in males aged 80–89 years in Canada, 1971–2015**

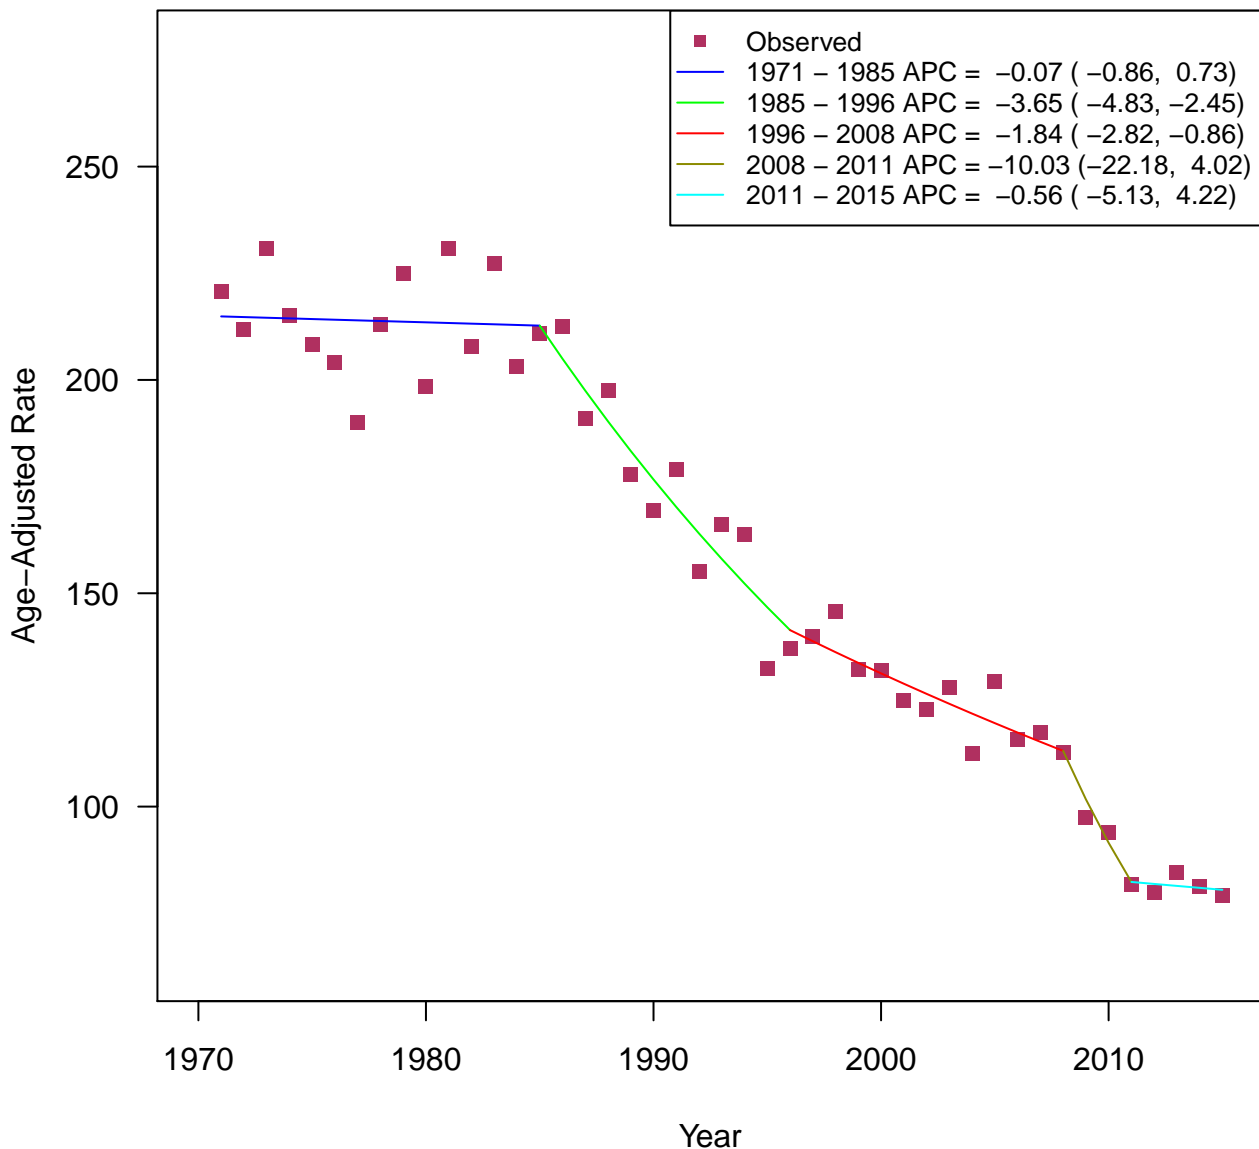

**Figure 373. Age-adjusted incidence rates of stomach cancer in females aged 20–29 years in Canada, 1971–2015**

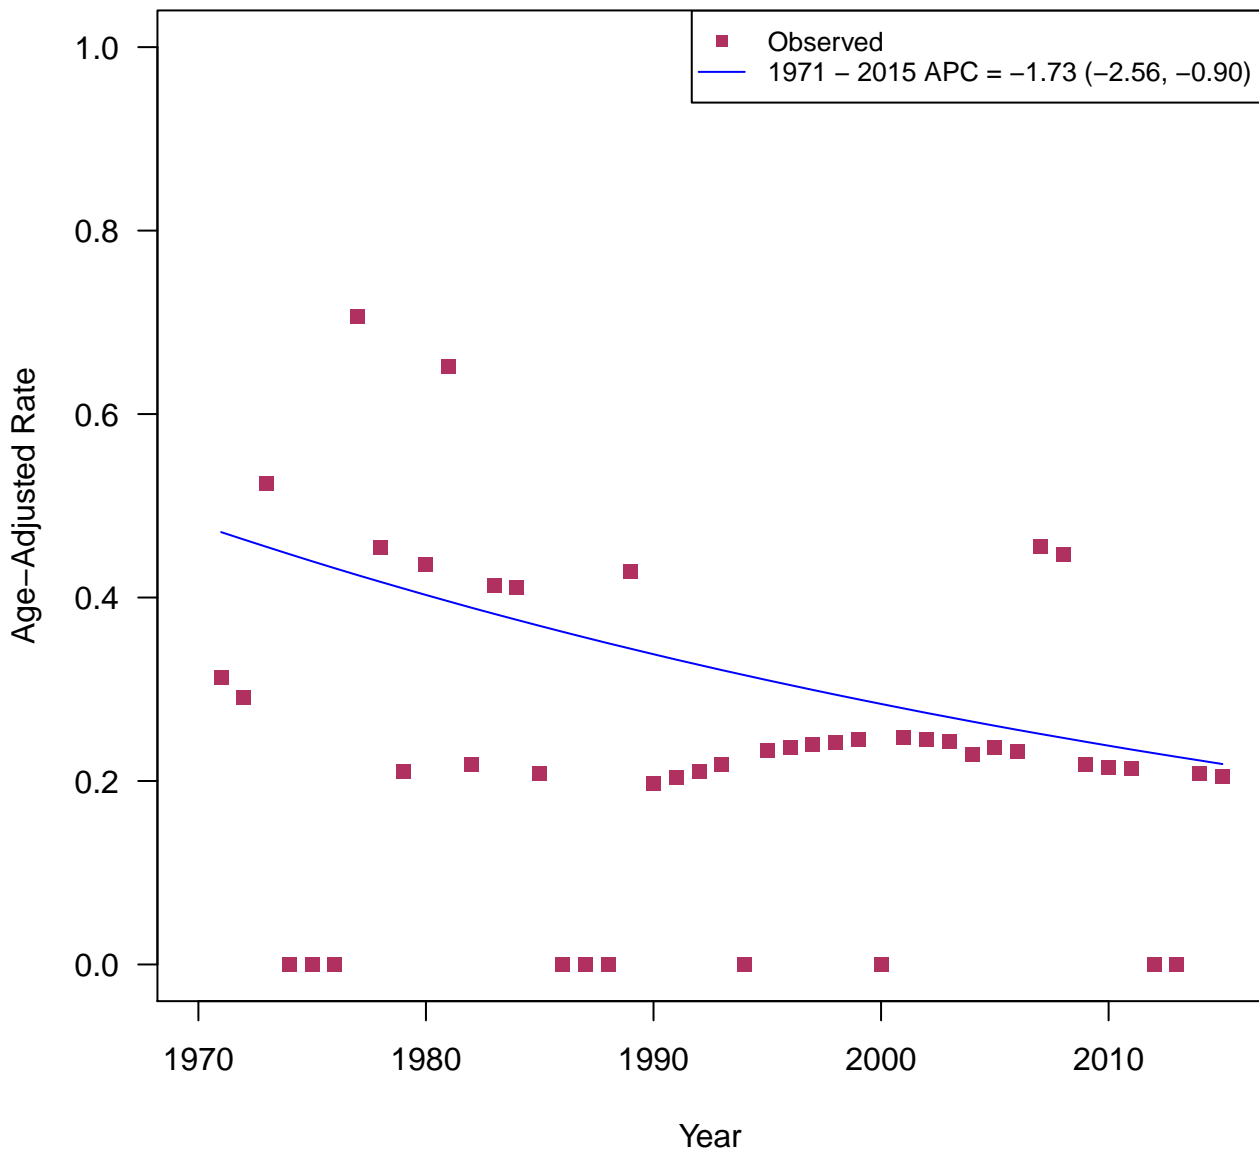

**Figure 374. Age-adjusted incidence rates of stomach cancer in females aged 20–39 years in Canada, 1971–2015**

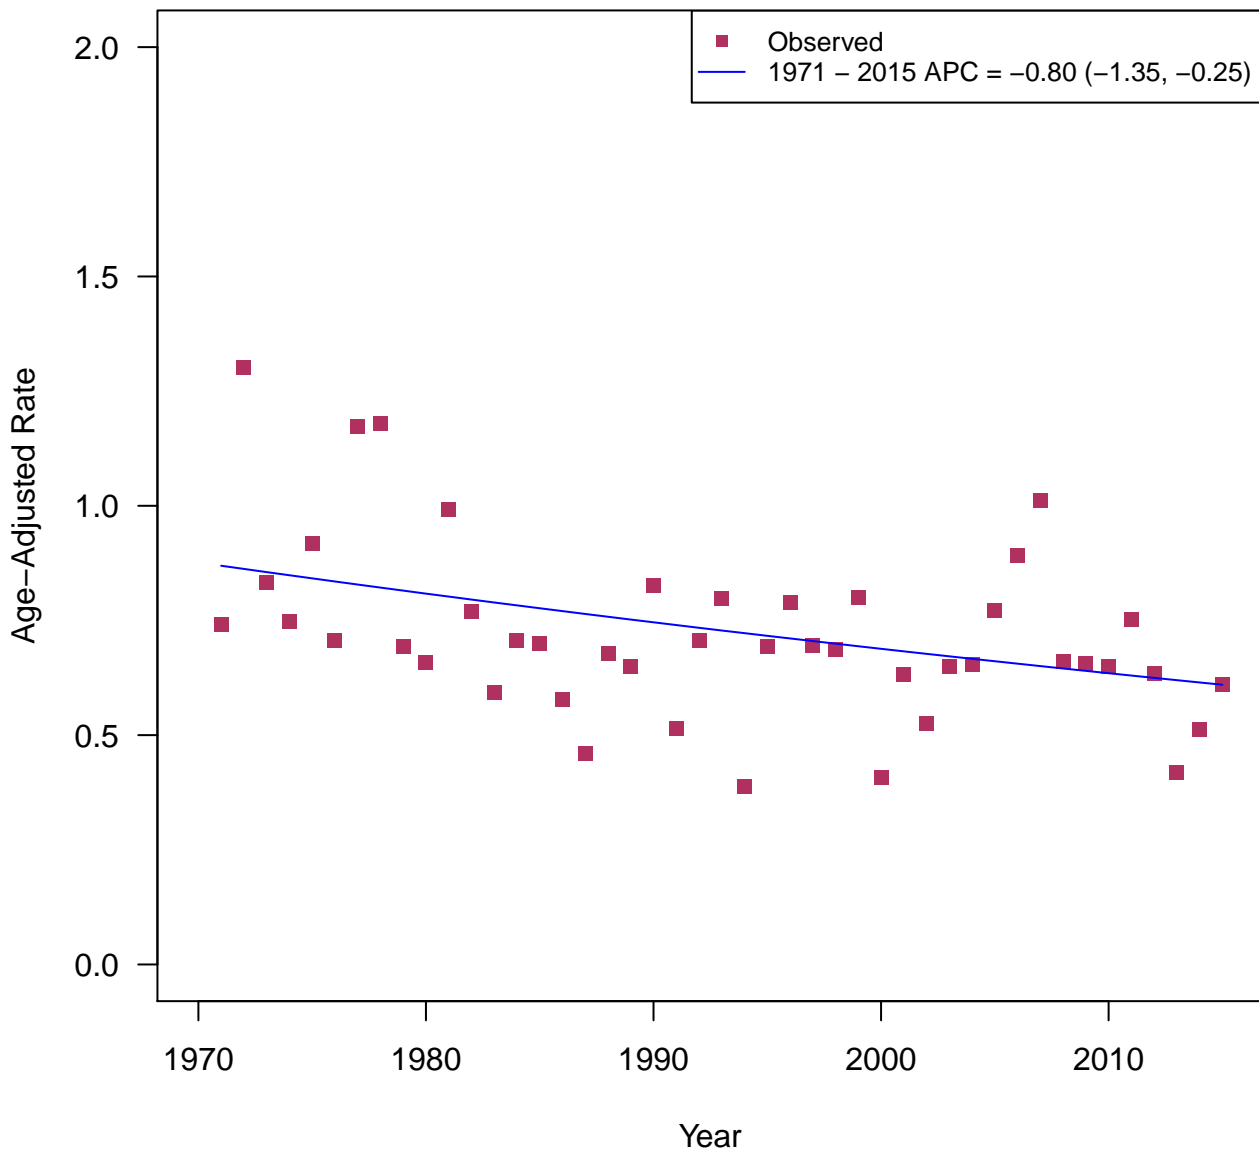

**Figure 375. Age-adjusted incidence rates of stomach cancer in females aged 30–39 years in Canada, 1971–2015**

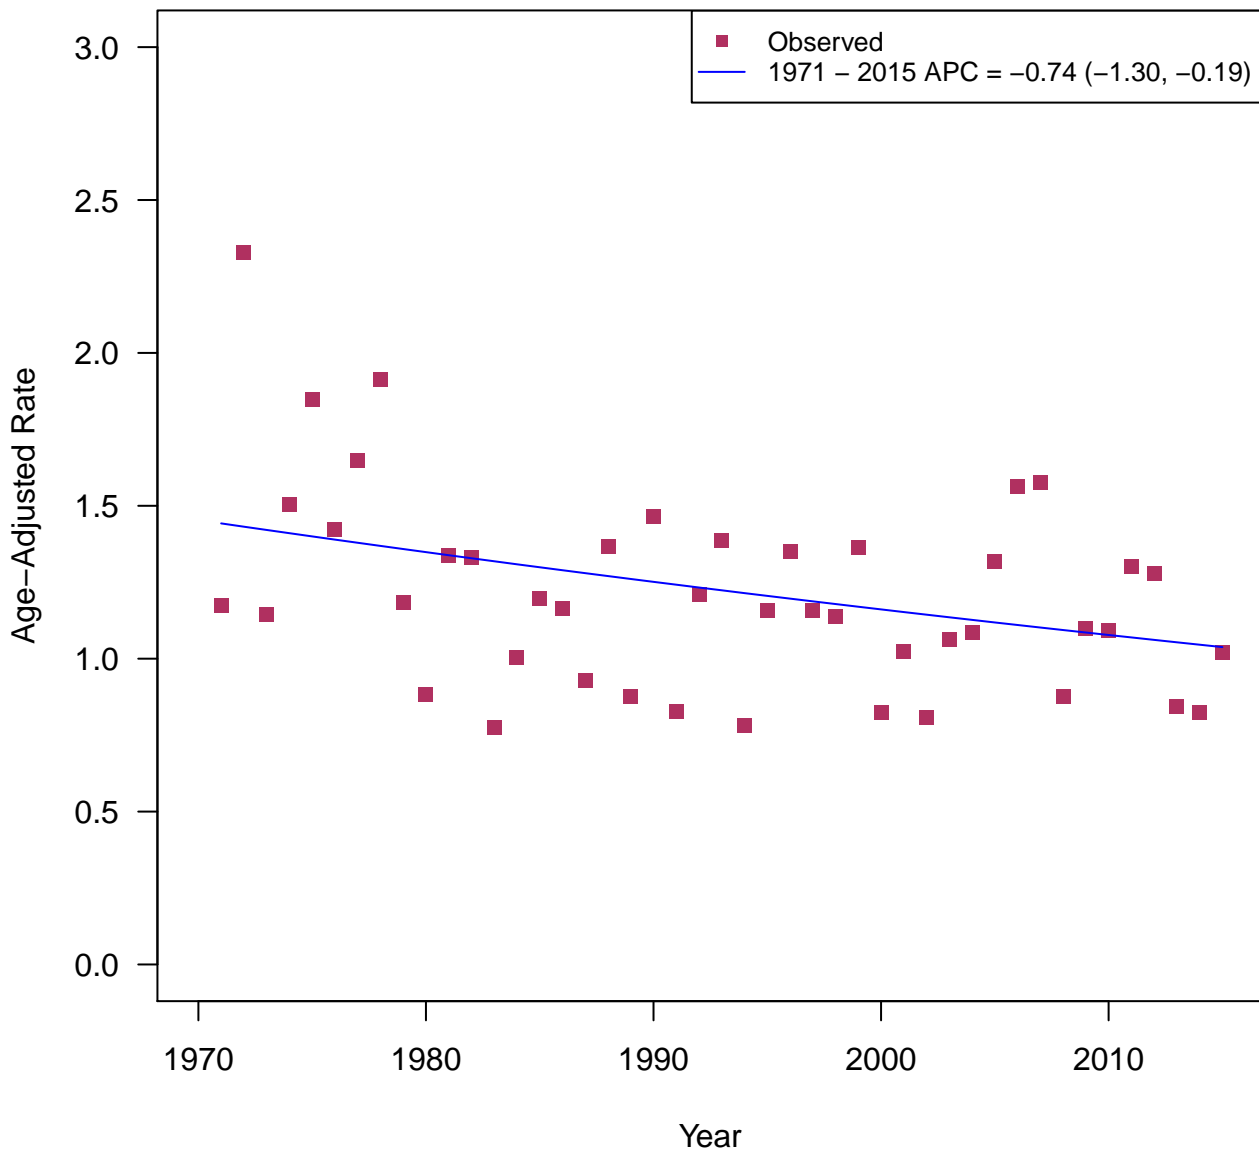

**Figure 376. Age-adjusted incidence rates of stomach cancer in females aged 40–49 years in Canada, 1971–2015**

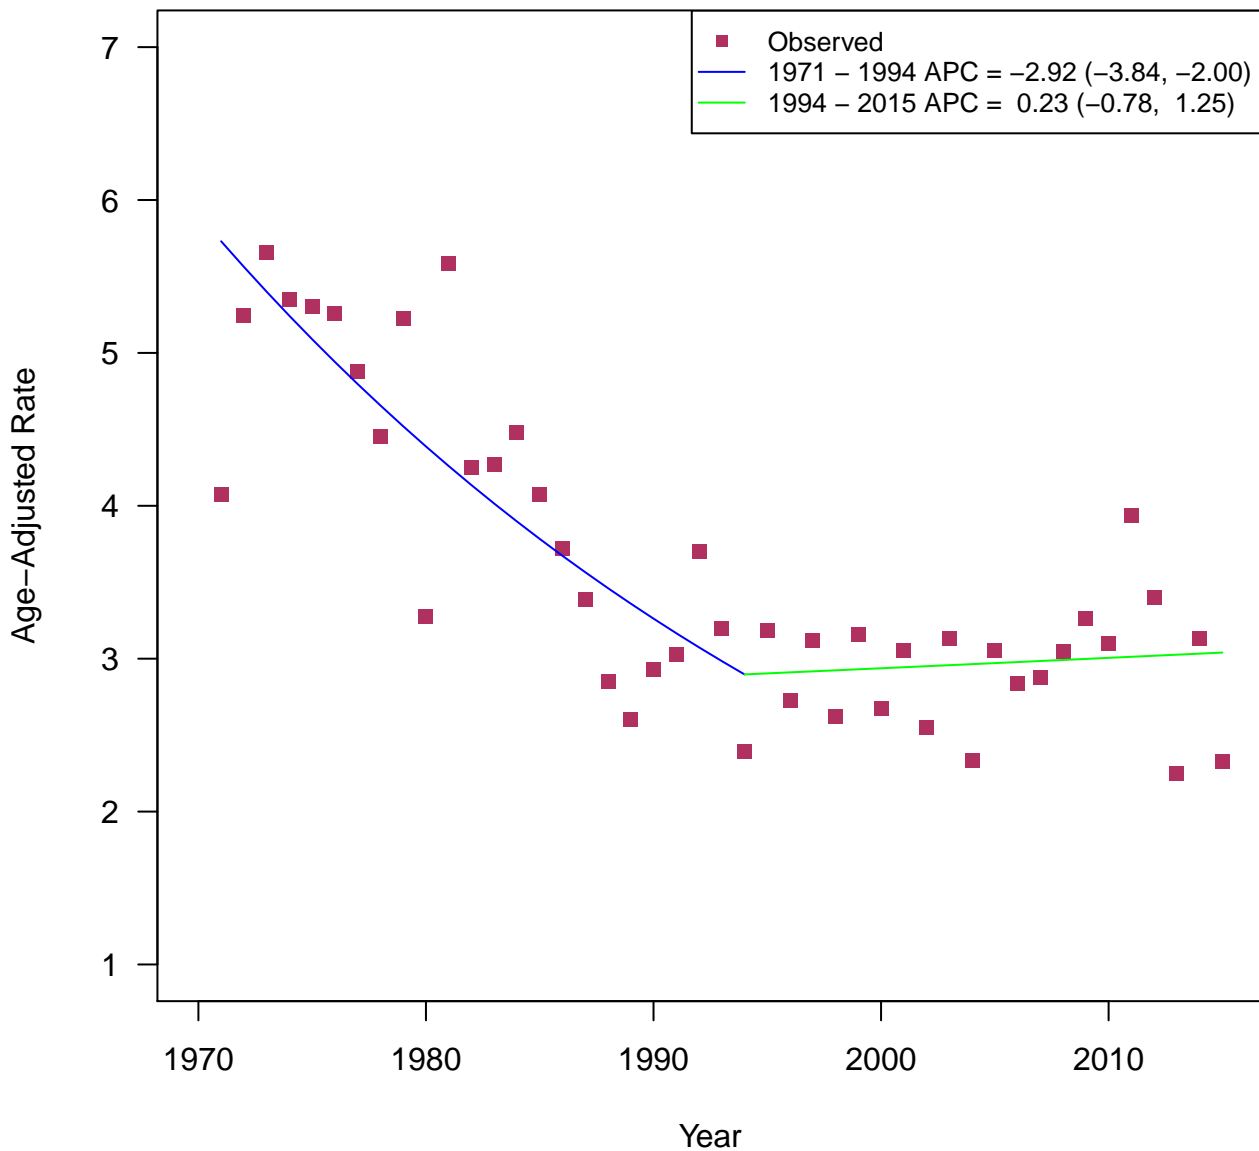

**Figure 377. Age-adjusted incidence rates of stomach cancer in females aged 50–59 years in Canada, 1971–2015**

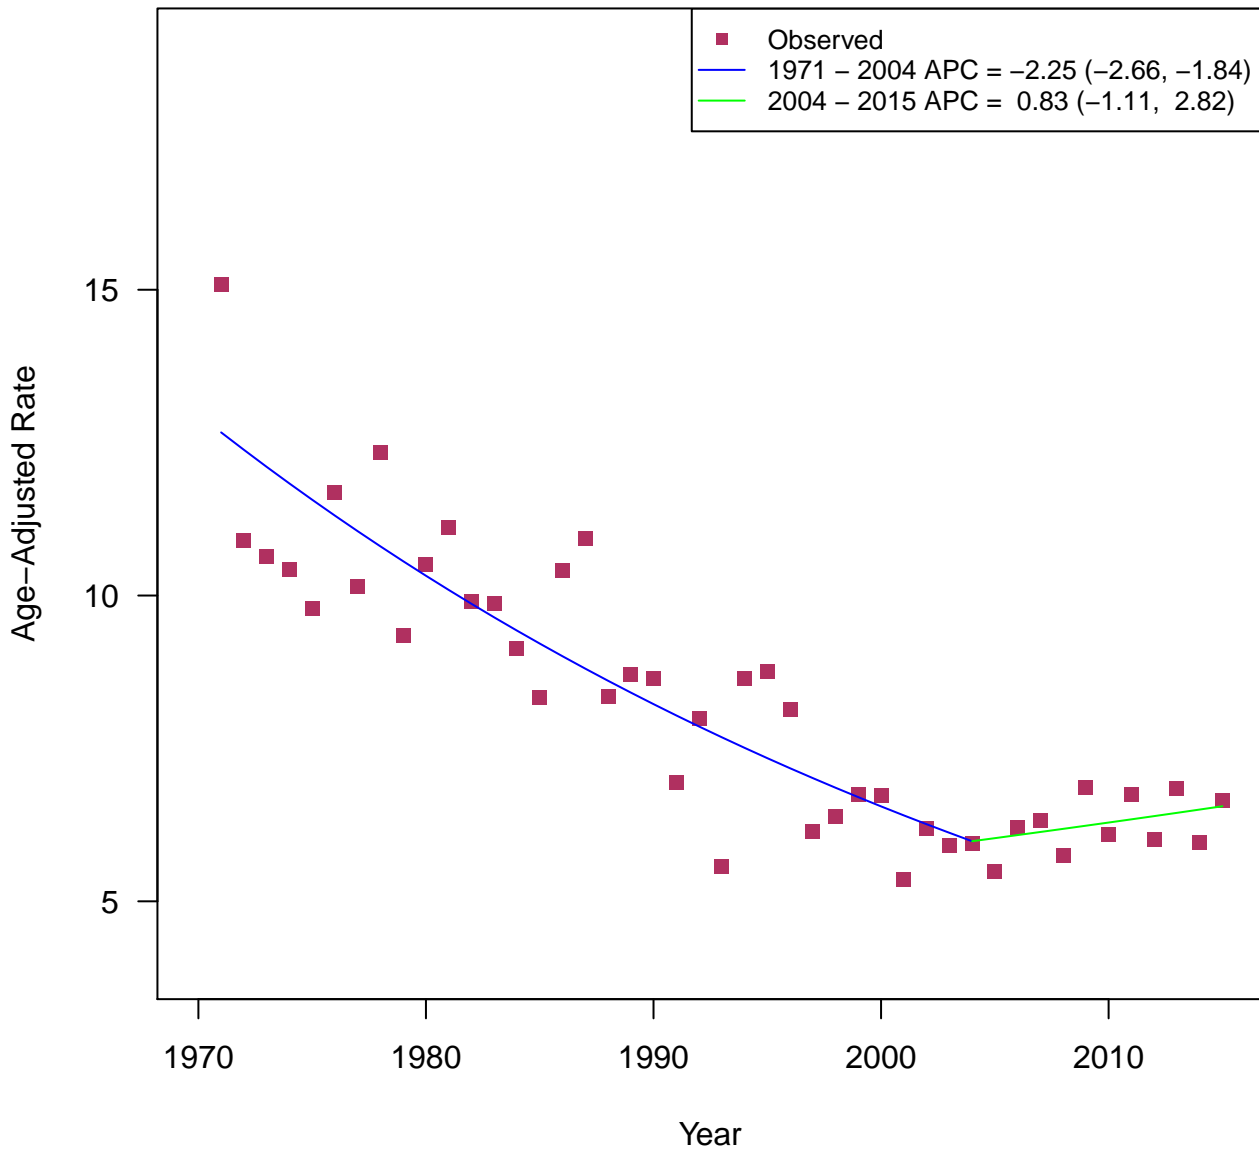

**Figure 378. Age-adjusted incidence rates of stomach cancer in females aged 60–69 years in Canada, 1971–2015**

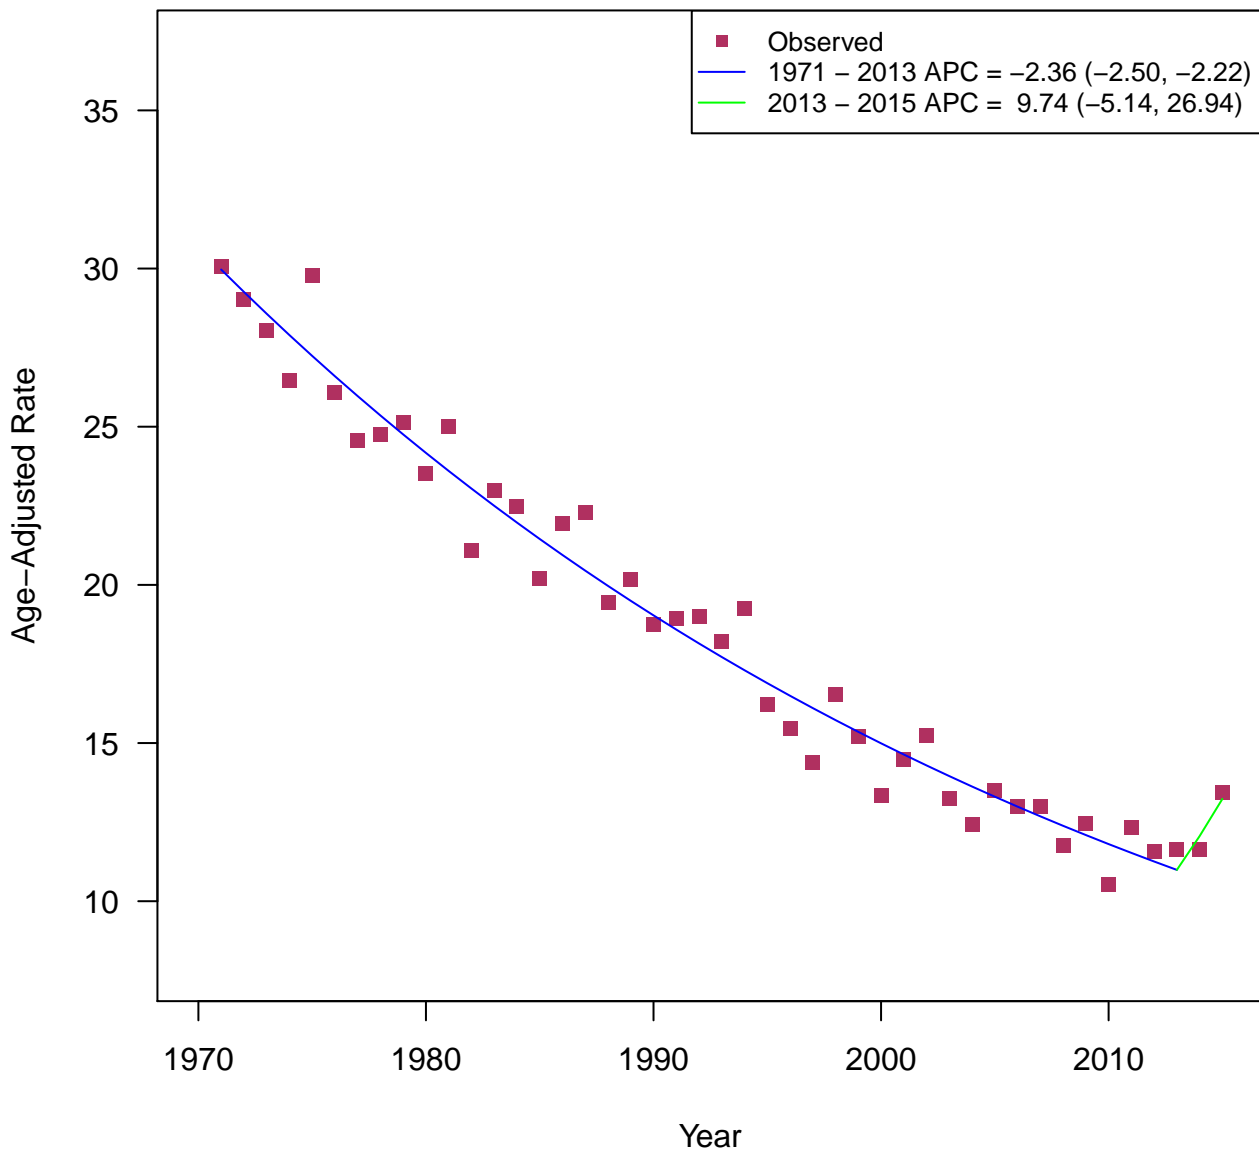

**Figure 379. Age-adjusted incidence rates of stomach cancer in females aged 70–79 years in Canada, 1971–2015**

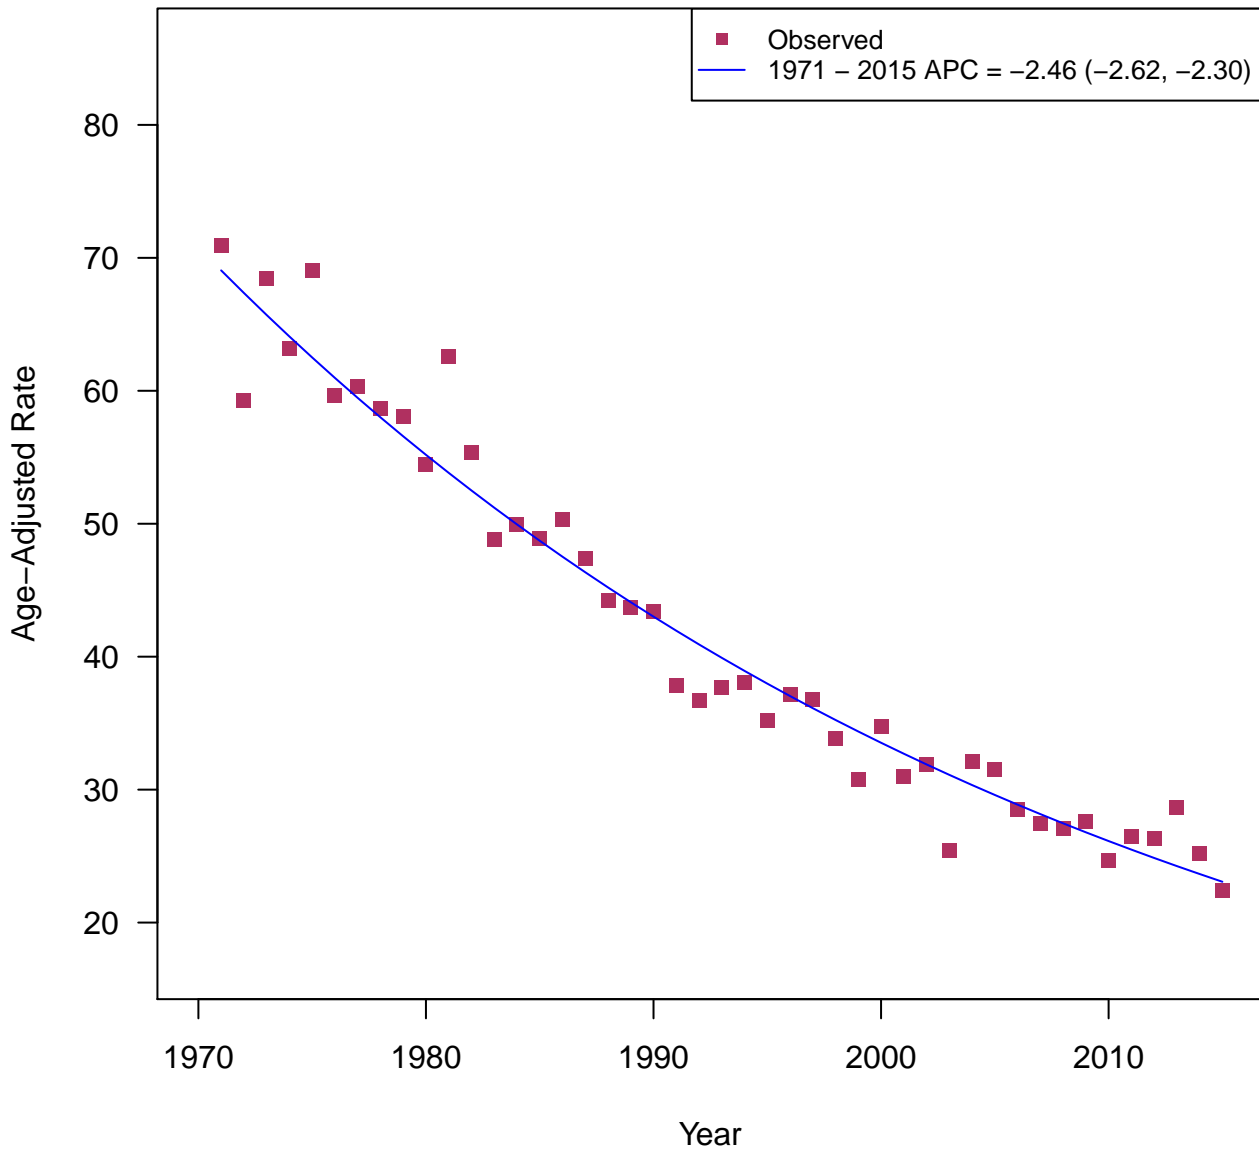



**Figure 380. Age-adjusted incidence rates of stomach cancer in females aged 80–89 years in Canada, 1971–2015**

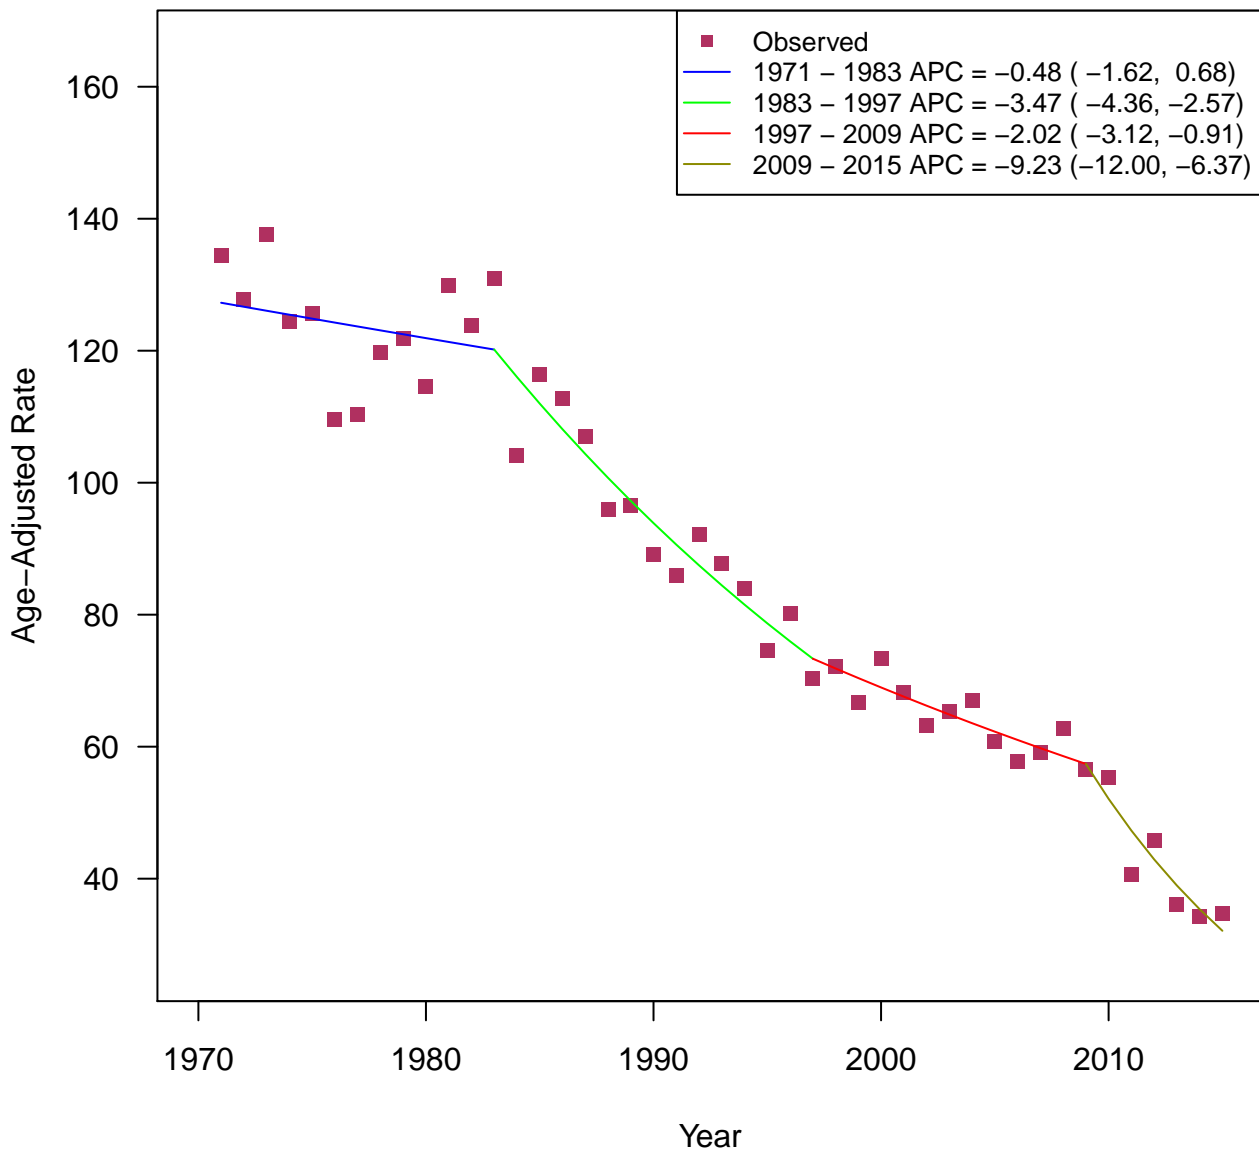

**Figure 381. Age-adjusted incidence rates of testicular cancer in males aged 20–29 years in Canada, 1971–2015**

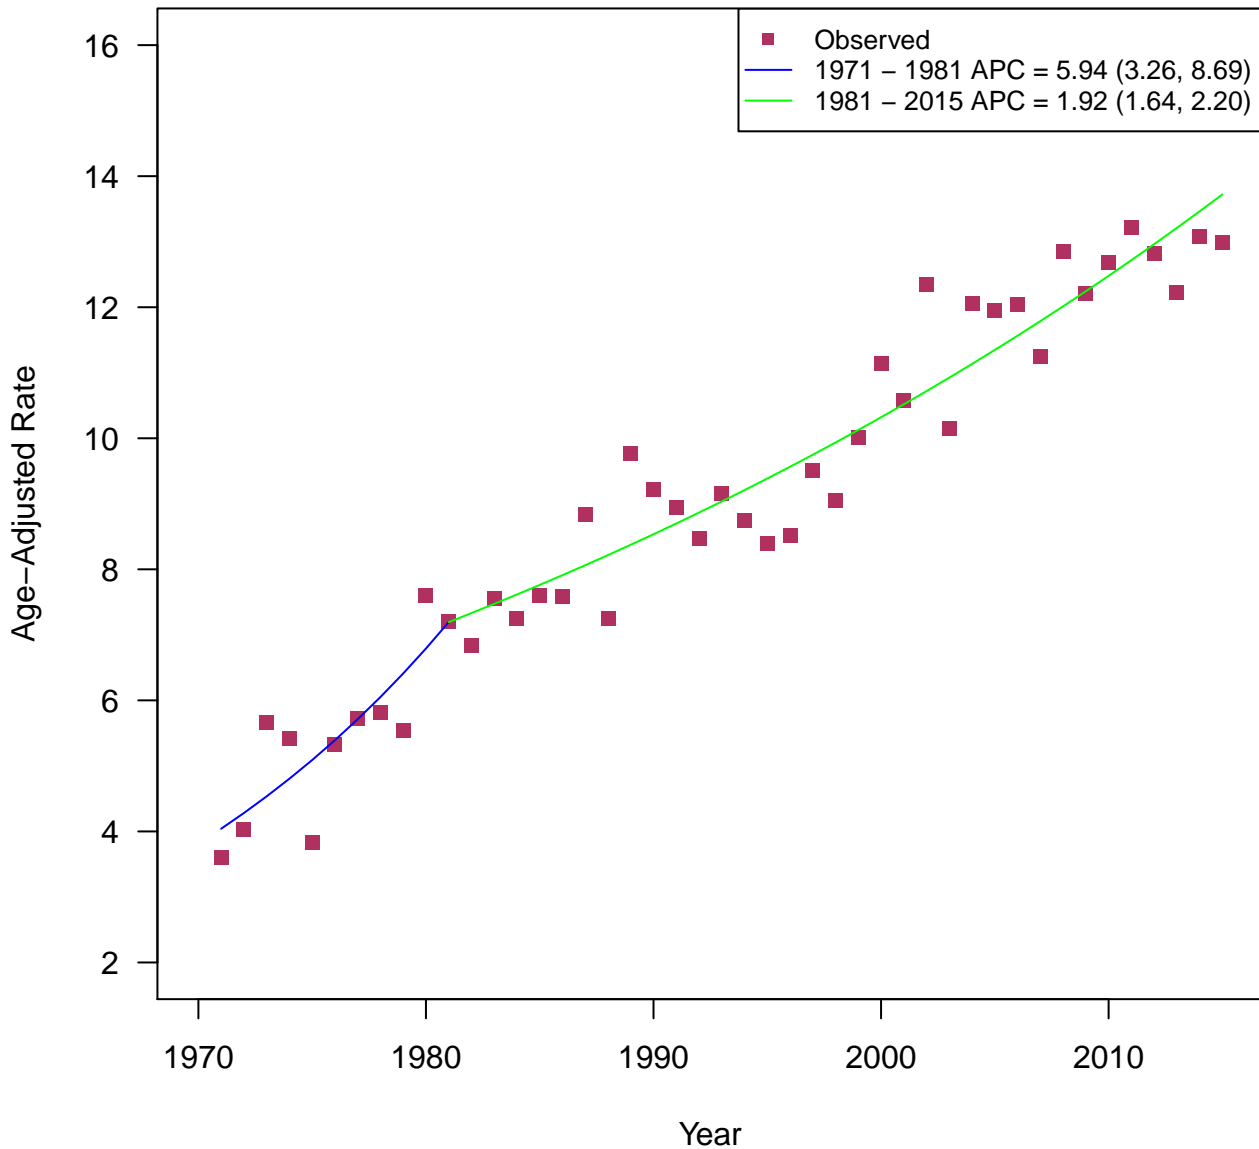

**Figure 382. Age-adjusted incidence rates of testicular cancer in males aged 20–39 years in Canada, 1971–2015**

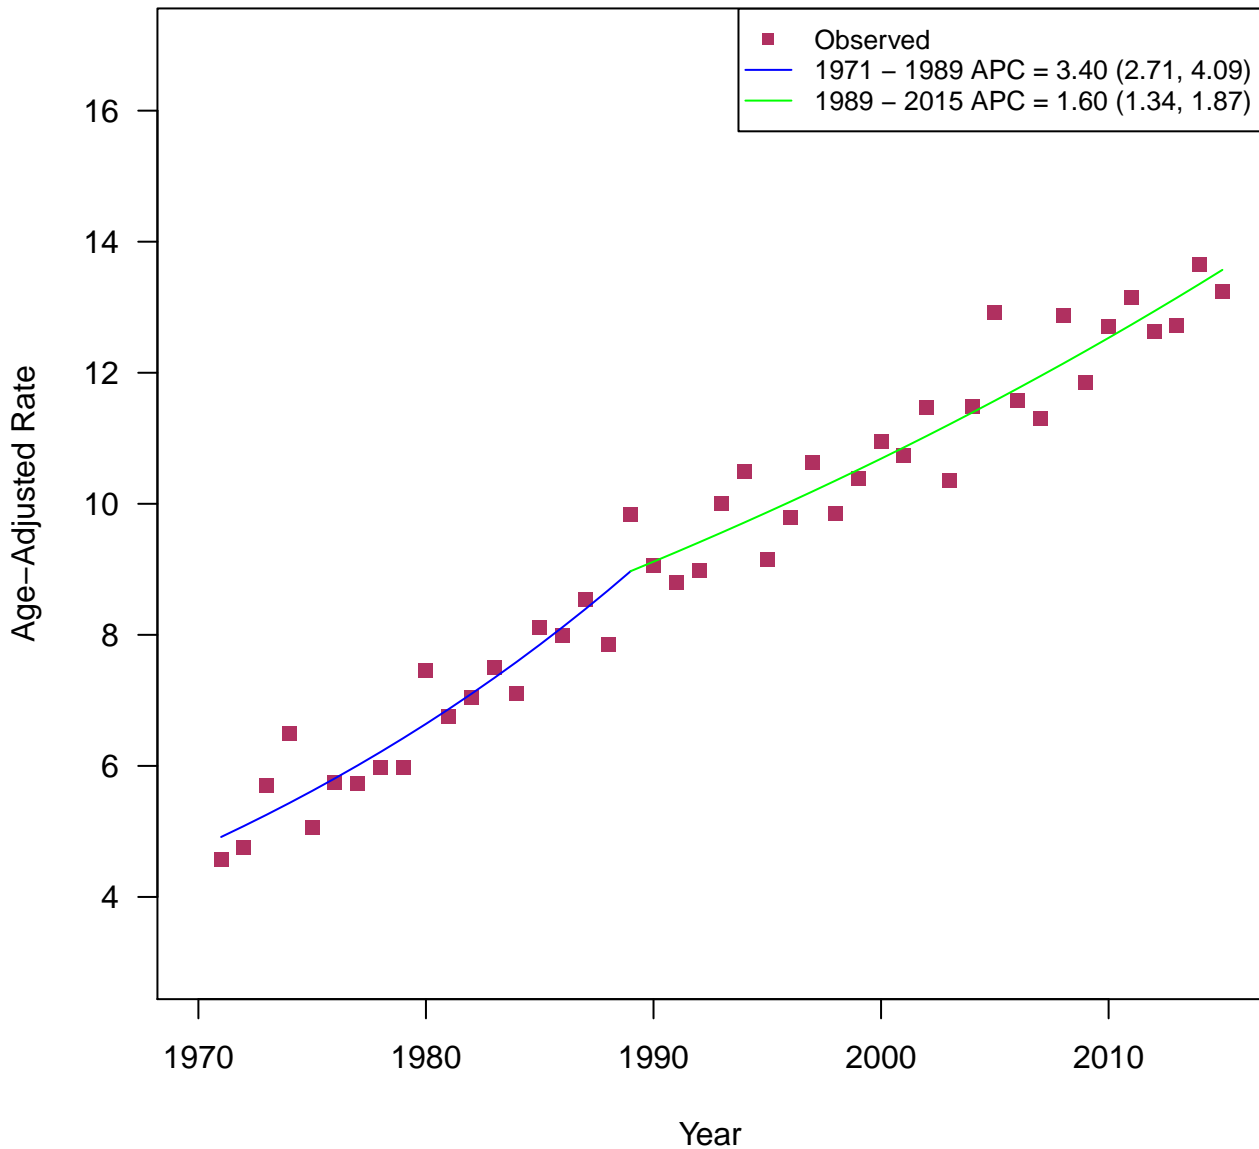

**Figure 383. Age-adjusted incidence rates of testicular cancer in males aged 20–49 years in Canada, 1971–2015**

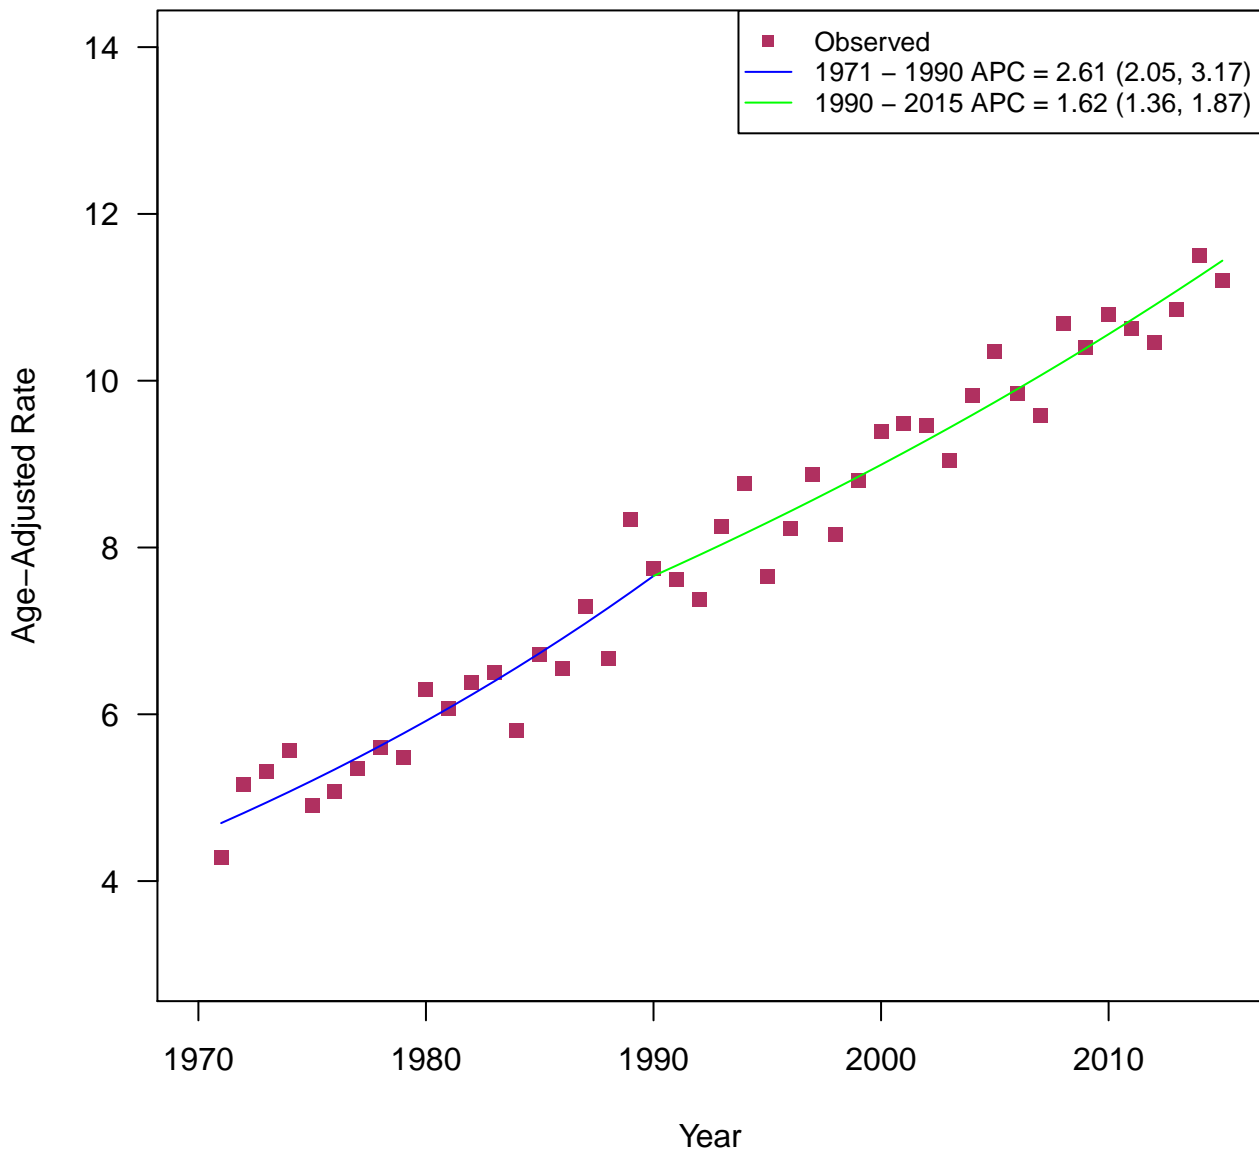

**Figure 384. Age-adjusted incidence rates of testicular cancer in males aged 30–39 years in Canada, 1971–2015**

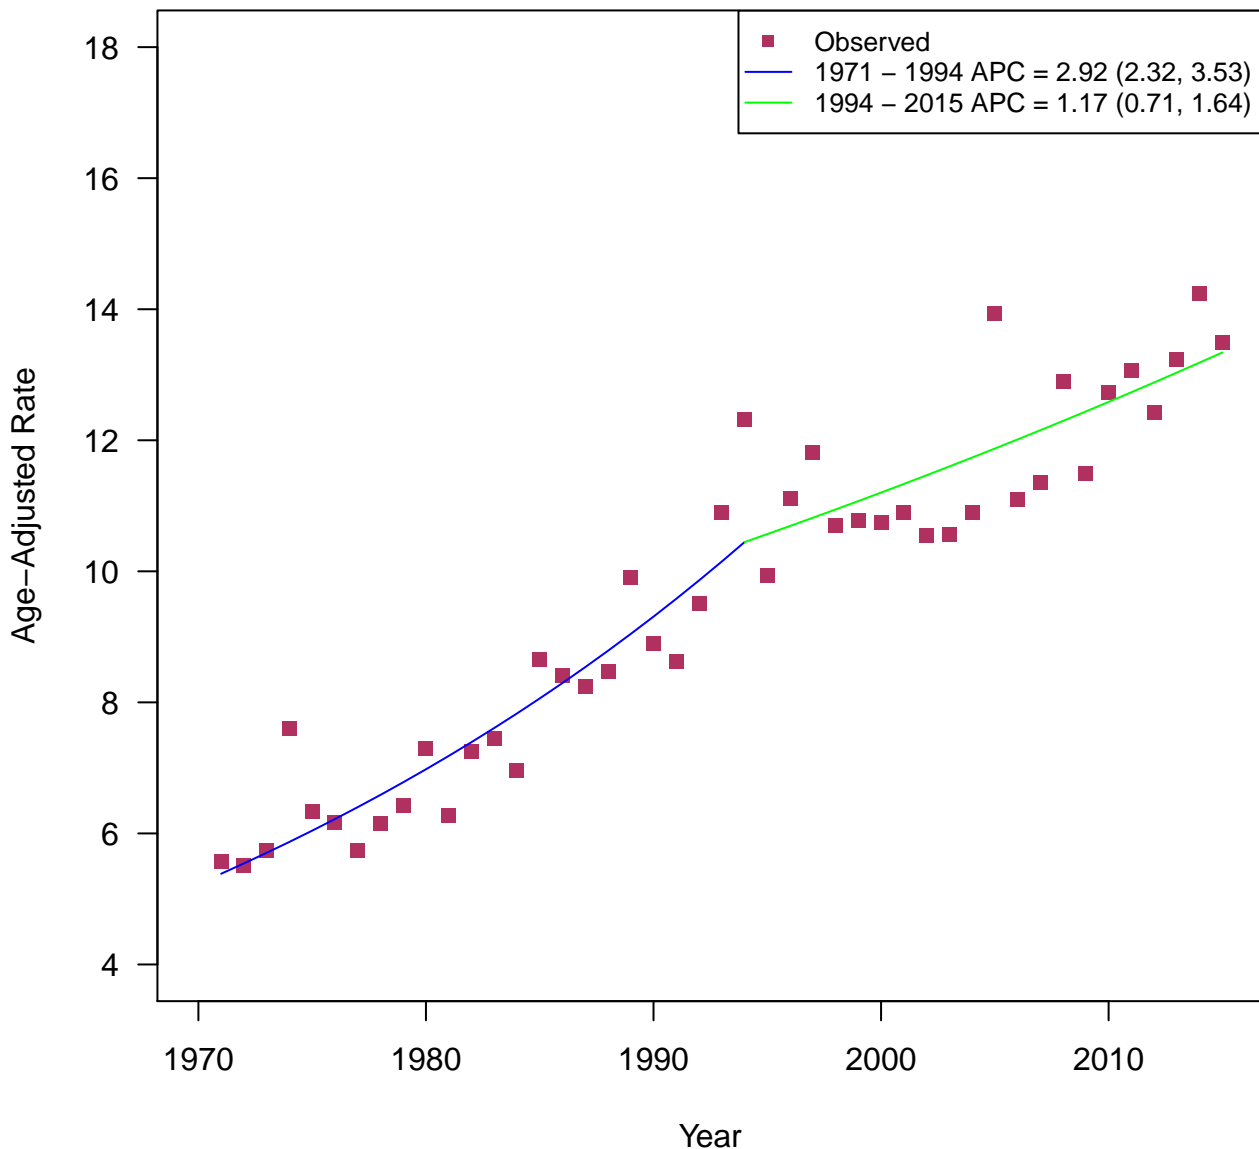

**Figure 385. Age-adjusted incidence rates of testicular cancer in males aged 40–49 years in Canada, 1971–2015**

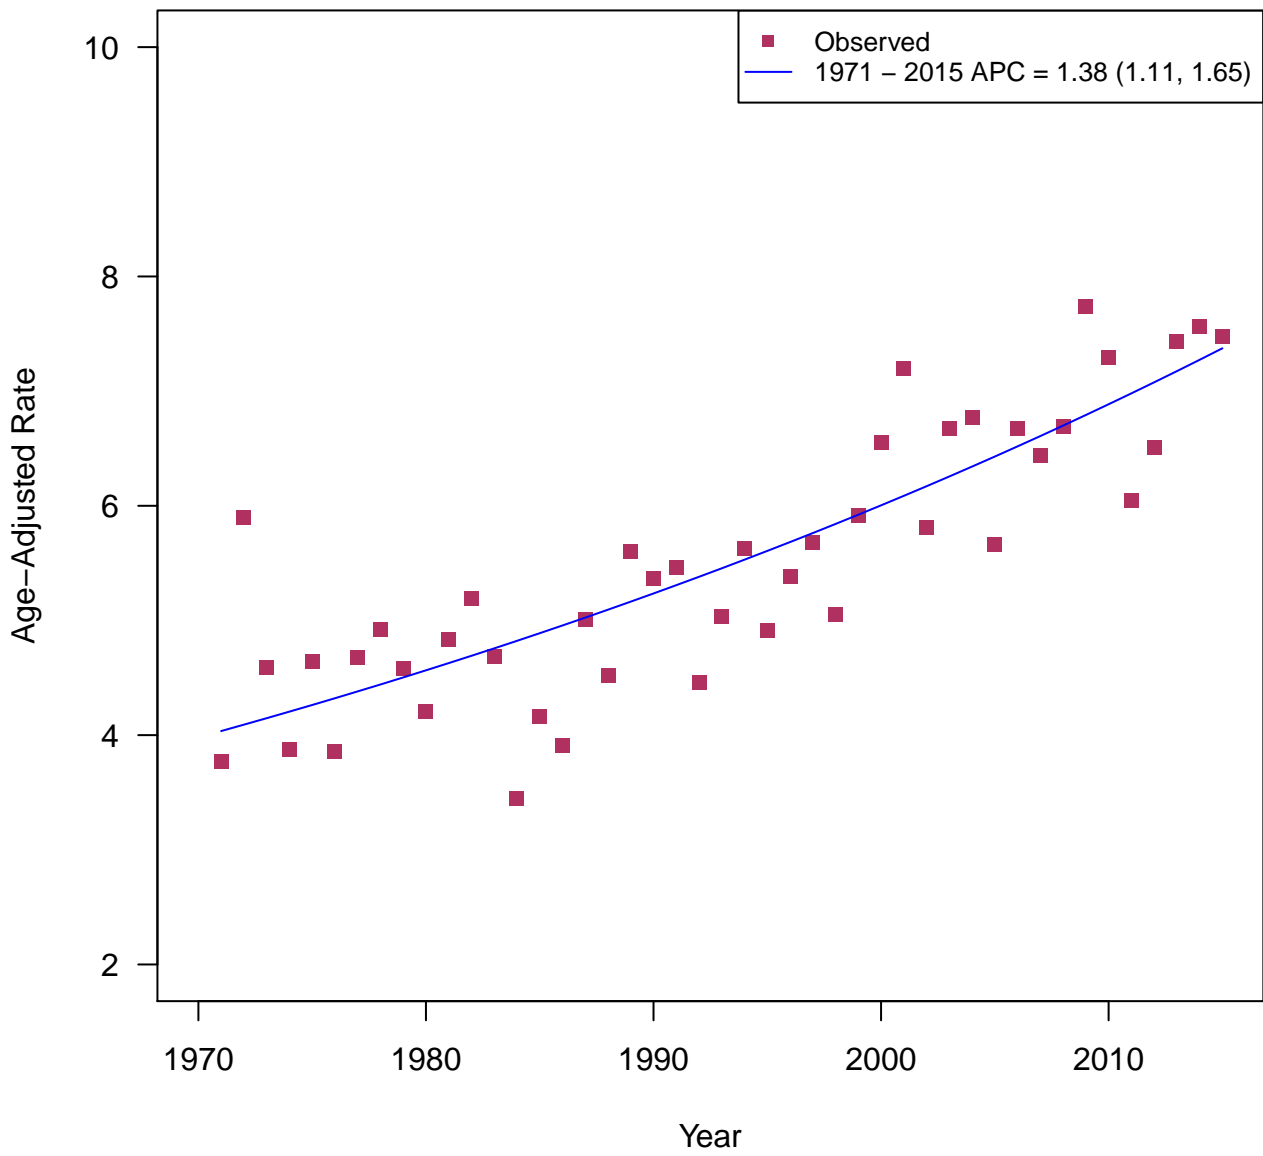

**Figure 386. Age-adjusted incidence rates of testicular cancer in males aged 50–59 years in Canada, 1971–2015**

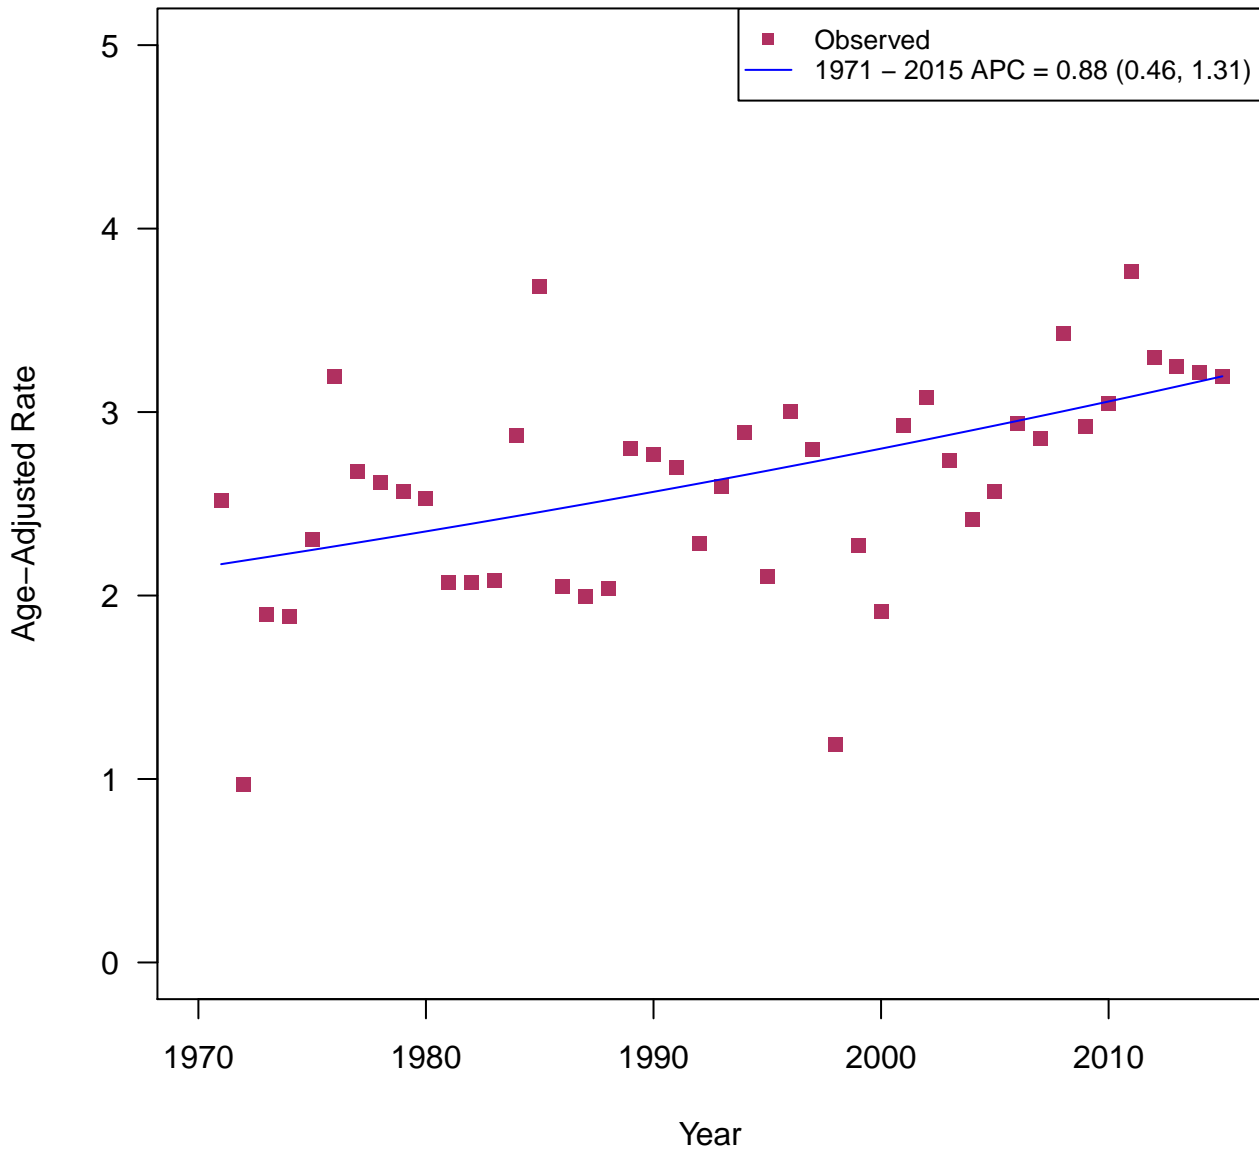

**Figure 387. Age-adjusted incidence rates of testicular cancer in males aged 60–69 years in Canada, 1971–2015**

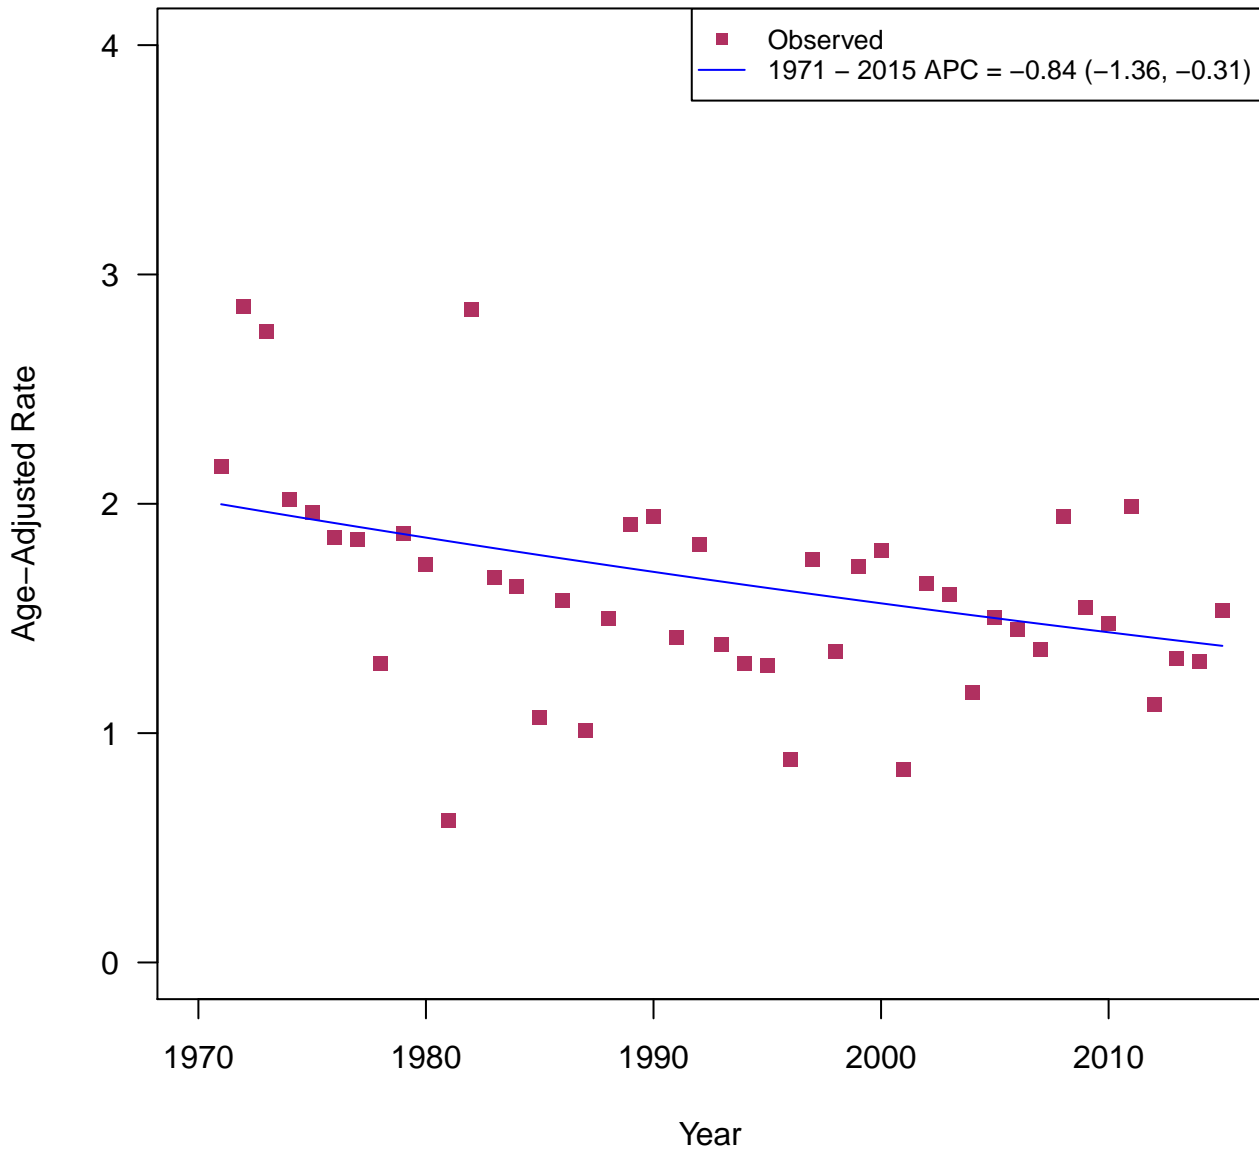



**Figure 388. Age-adjusted incidence rates of testicular cancer in males aged 70–79 years in Canada, 1971–2015**

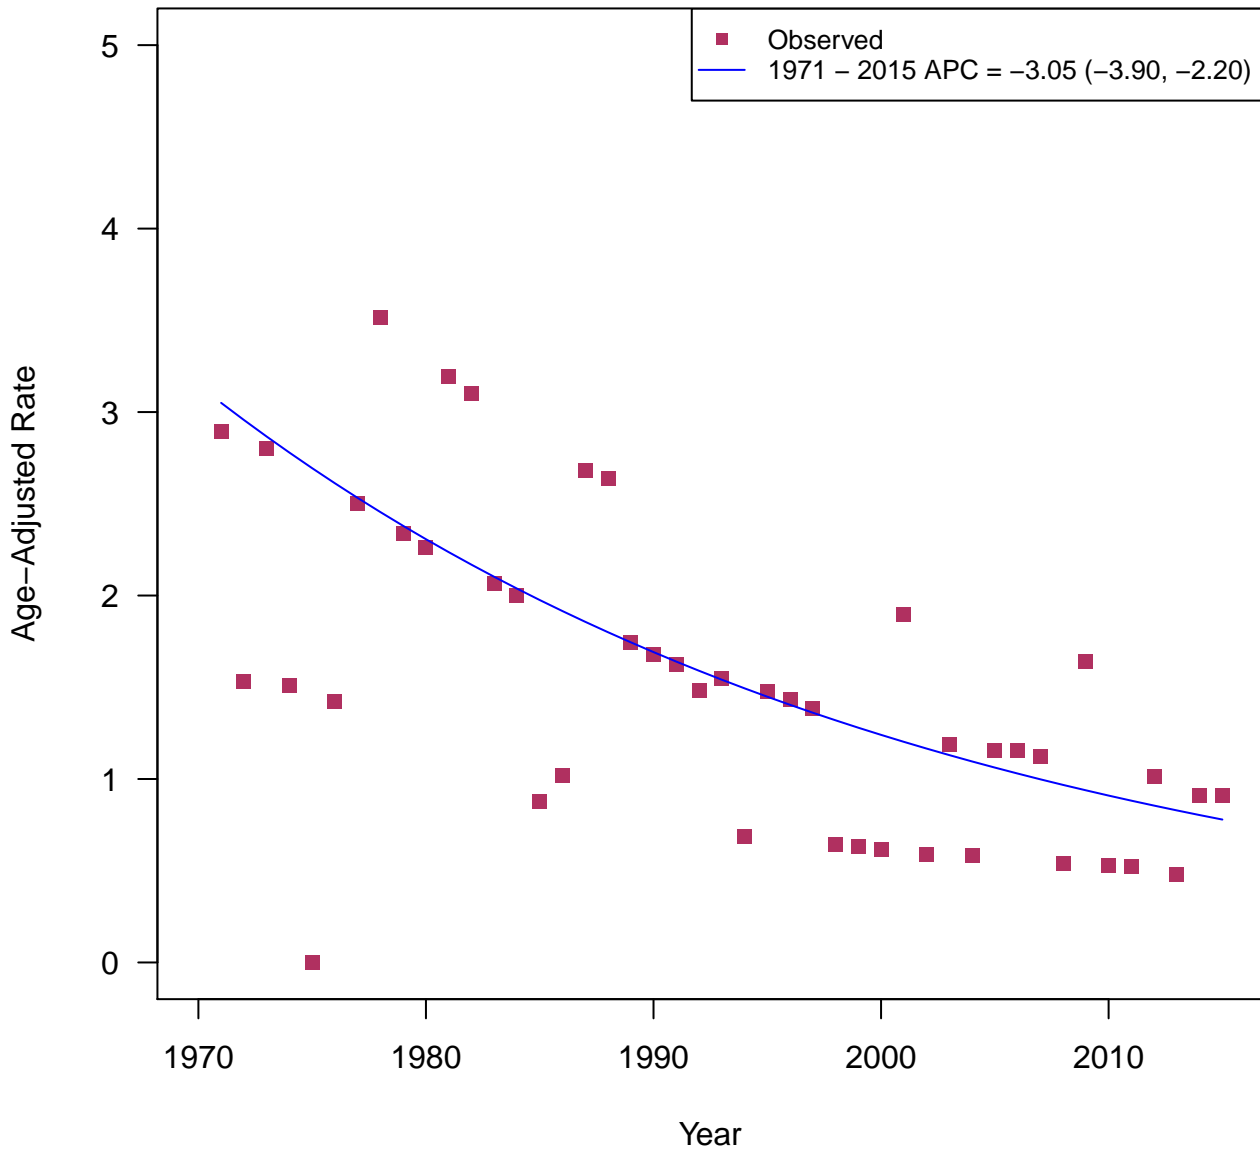

**Figure 389. Age-adjusted incidence rates of testicular cancer in males aged 80–89 years in Canada, 1971–2015**

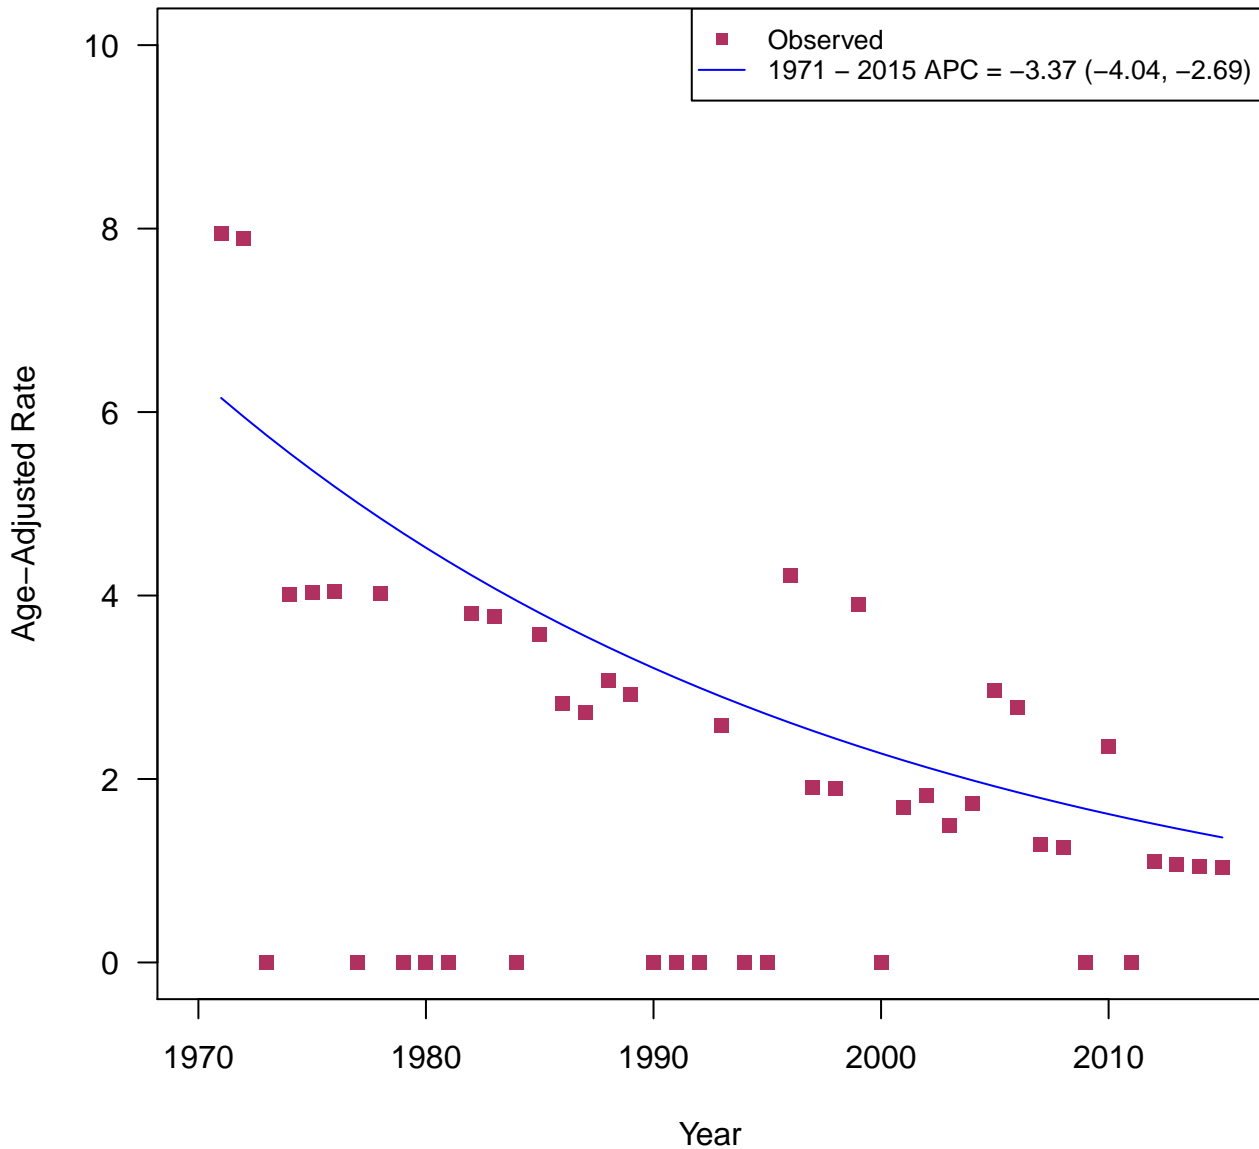

**Figure 390. Age-adjusted incidence rates of thyroid cancer in males aged 20–29 years in Canada, 1971–2015**

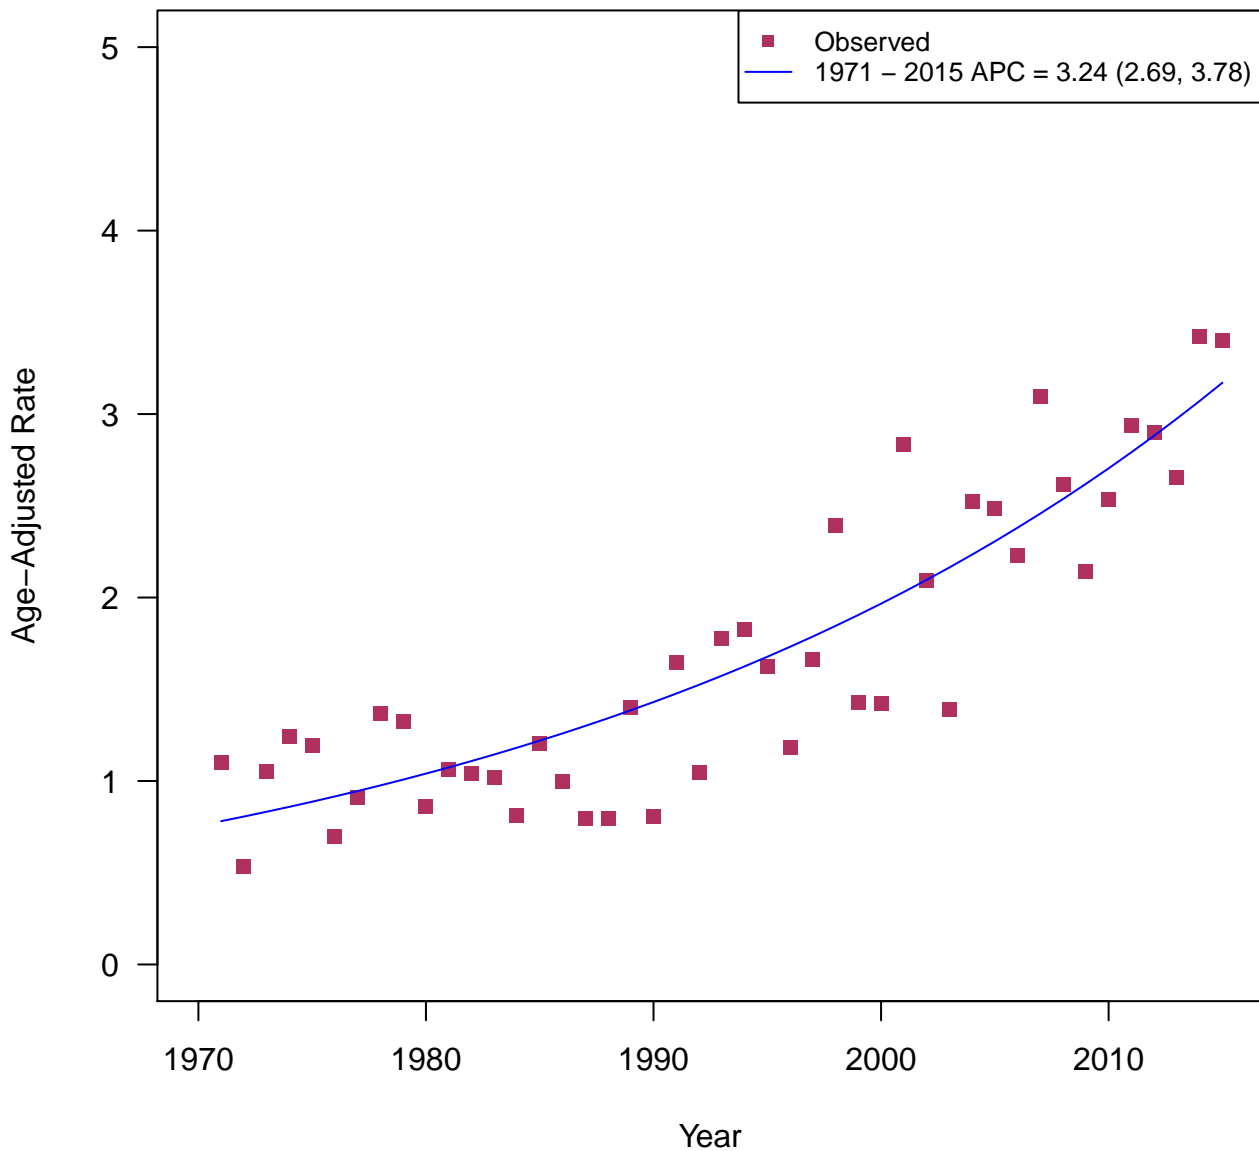

**Figure 391. Age-adjusted incidence rates of thyroid cancer in males aged 20–39 years in Canada, 1971–2015**

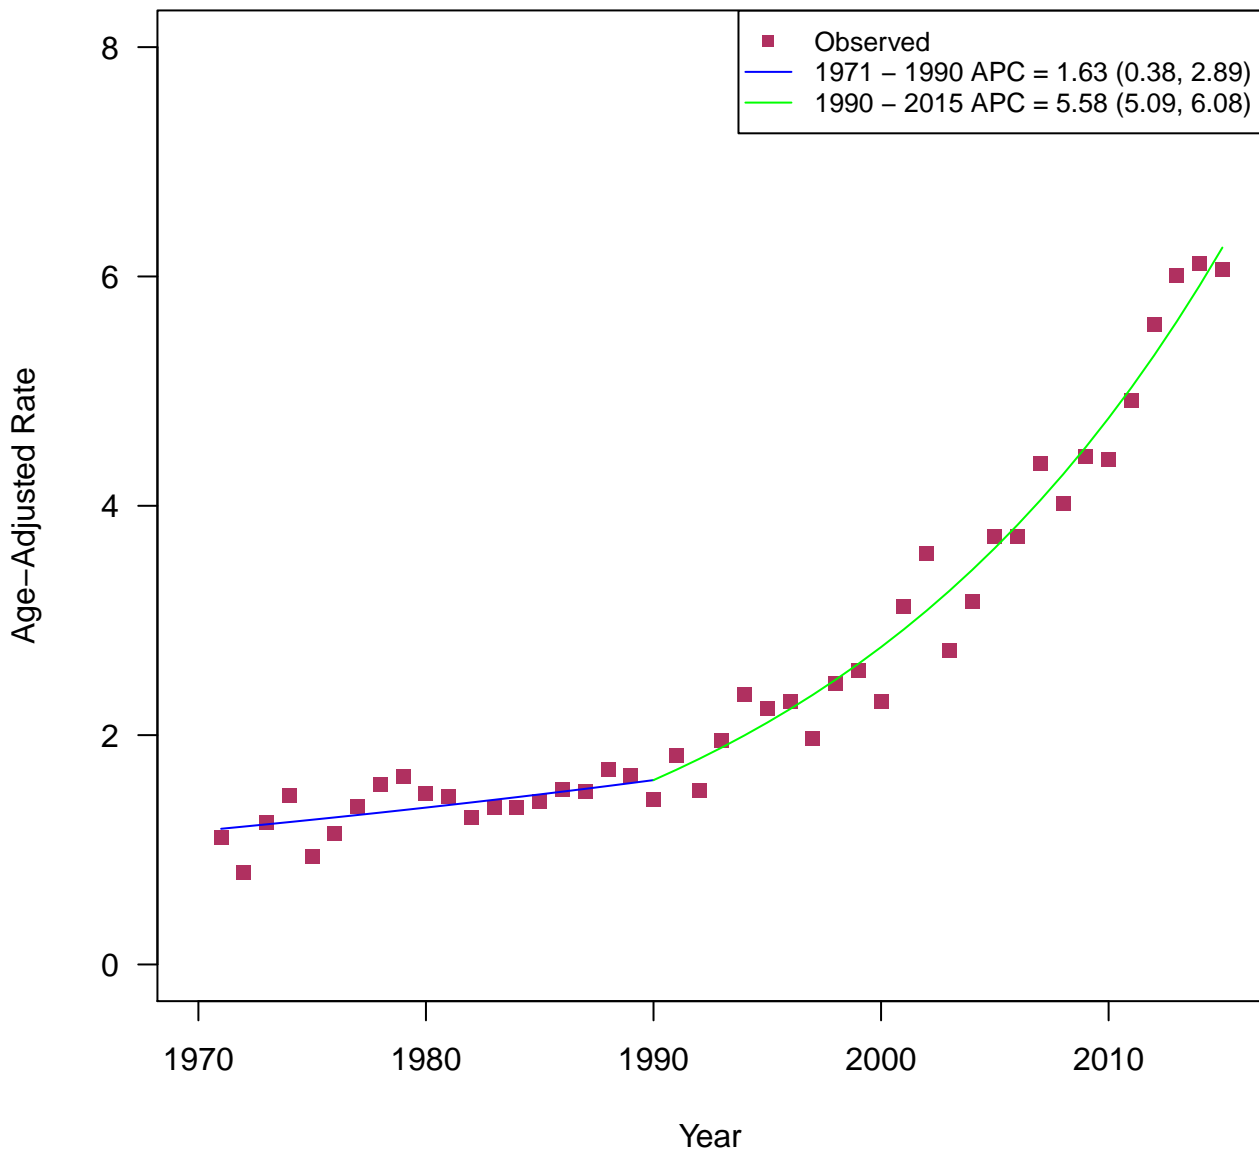

**Figure 392. Age-adjusted incidence rates of thyroid cancer in males aged 20–49 years in Canada, 1971–2015**

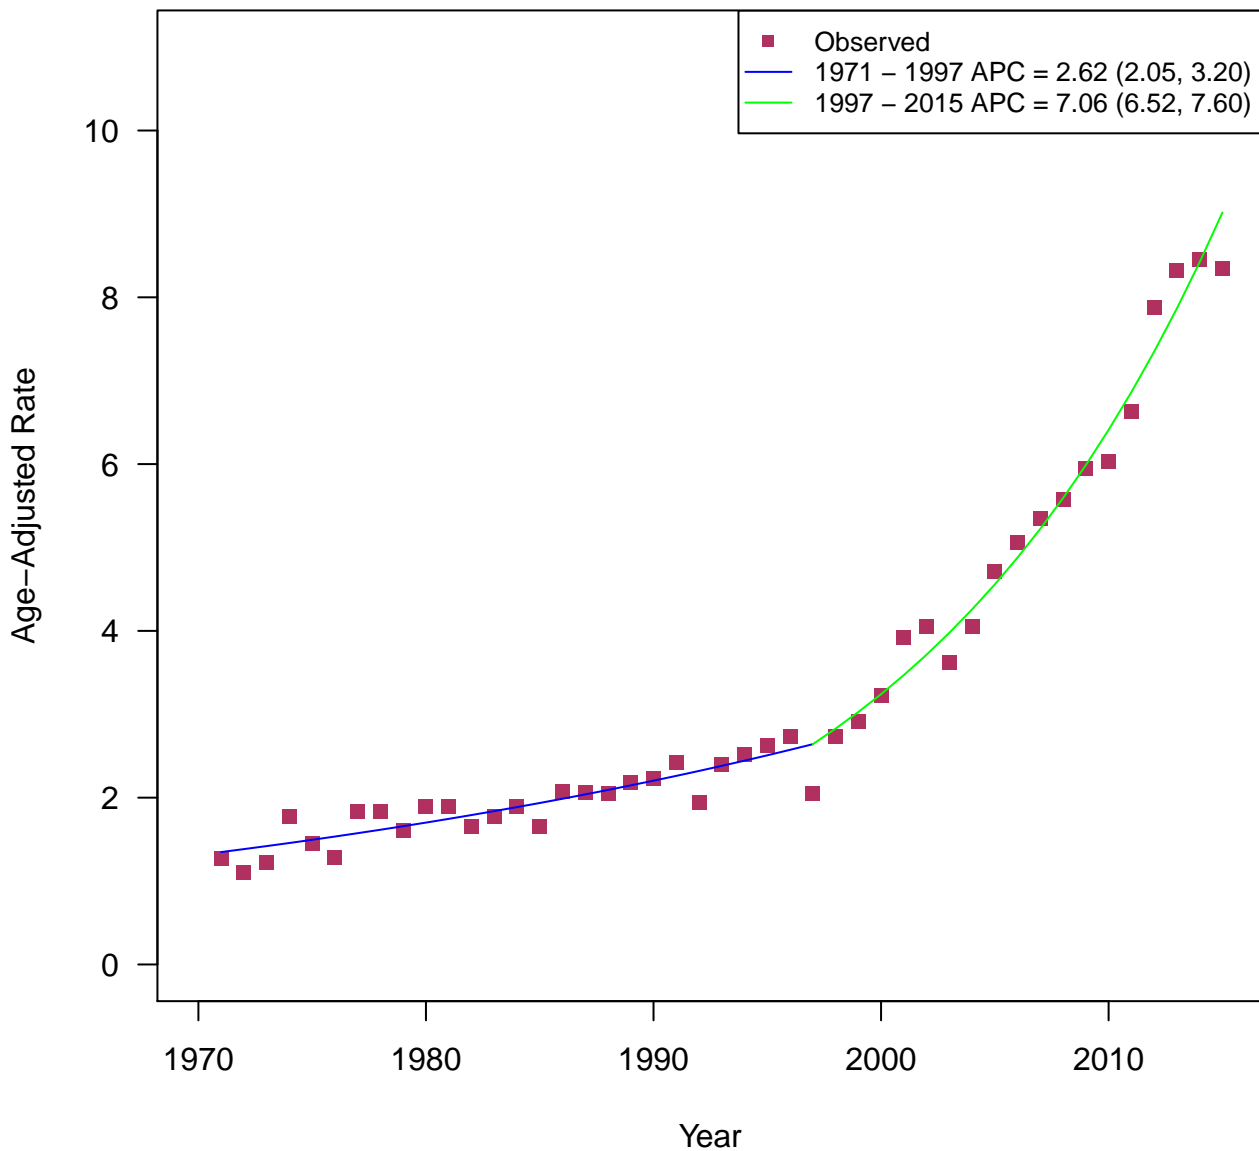

**Figure 393. Age-adjusted incidence rates of thyroid cancer in males aged 30–39 years in Canada, 1971–2015**

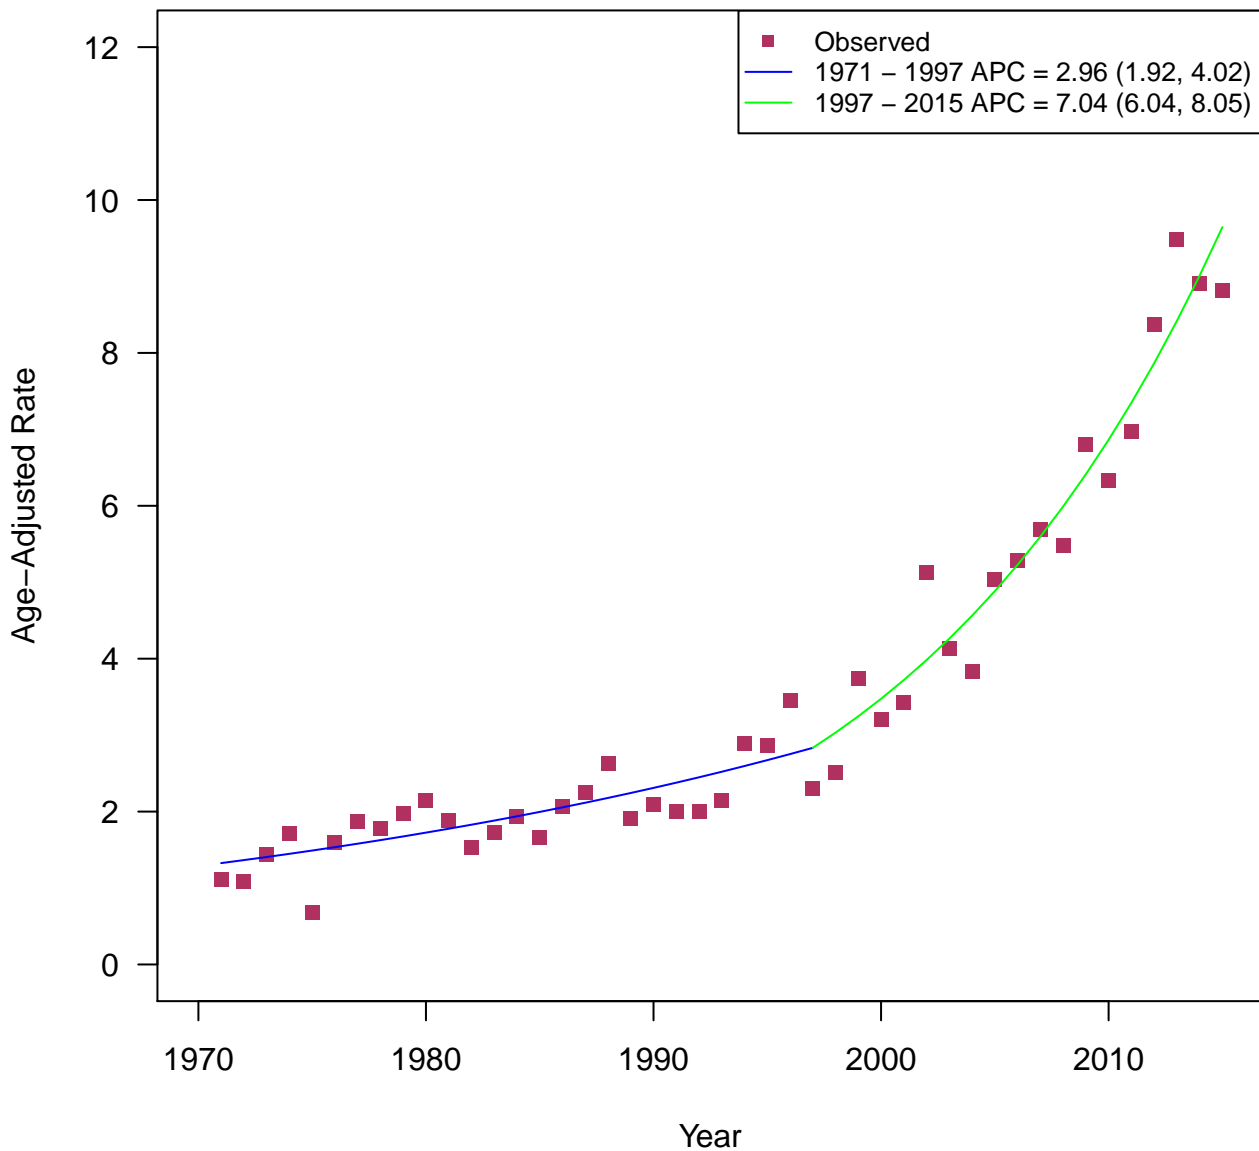

**Figure 394. Age-adjusted incidence rates of thyroid cancer in males aged 40–49 years in Canada, 1971–2015**

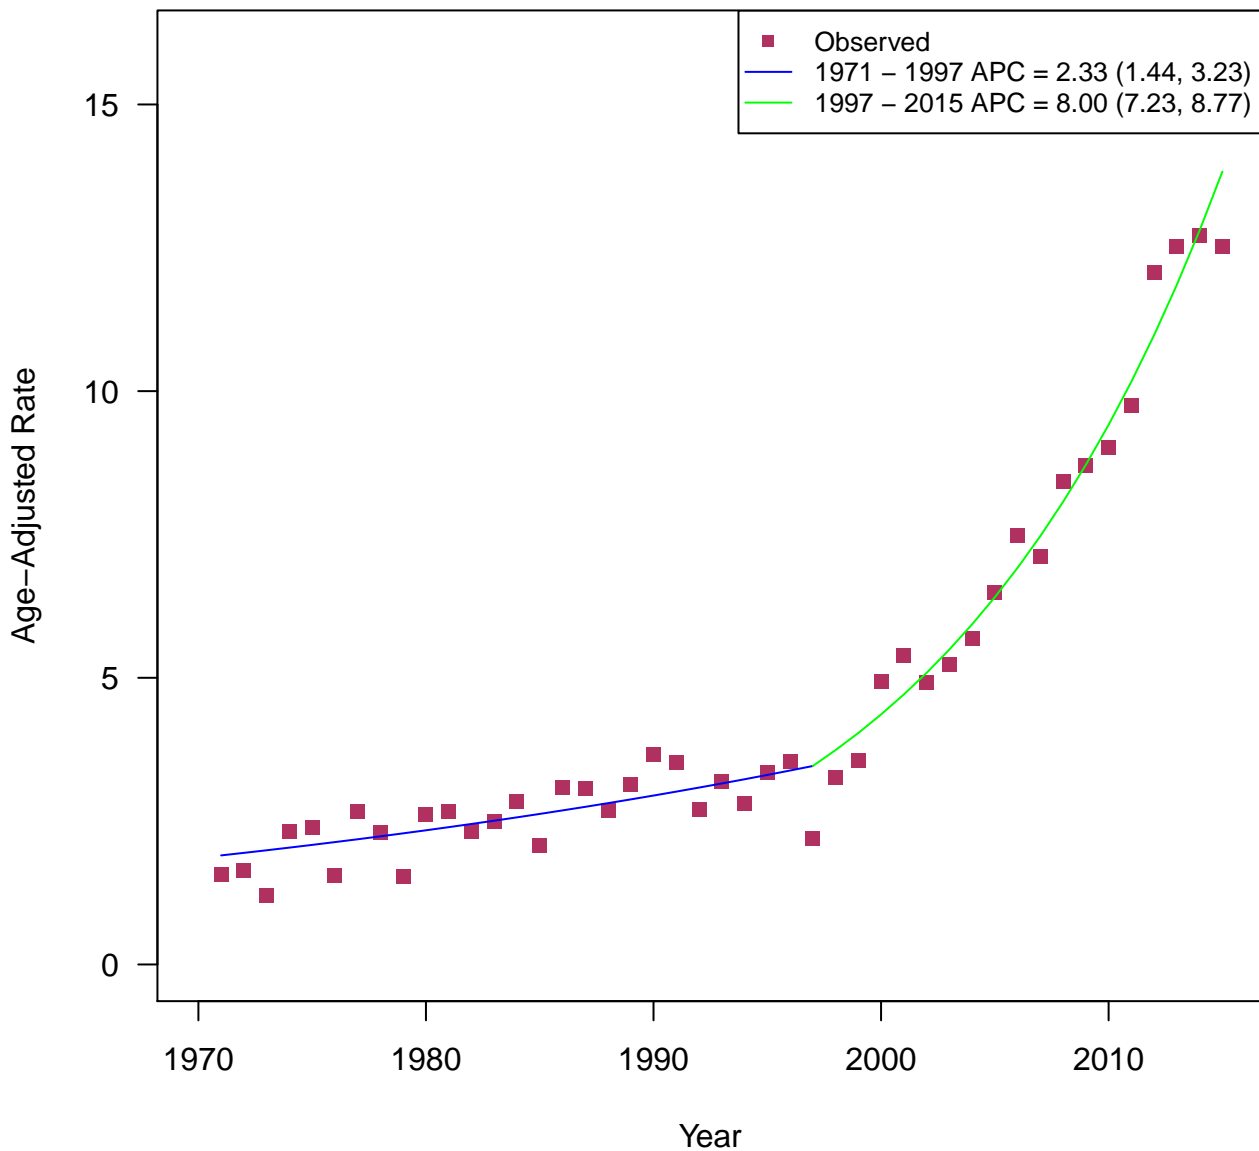

**Figure 395. Age-adjusted incidence rates of thyroid cancer in males aged 50–59 years in Canada, 1971–2015**

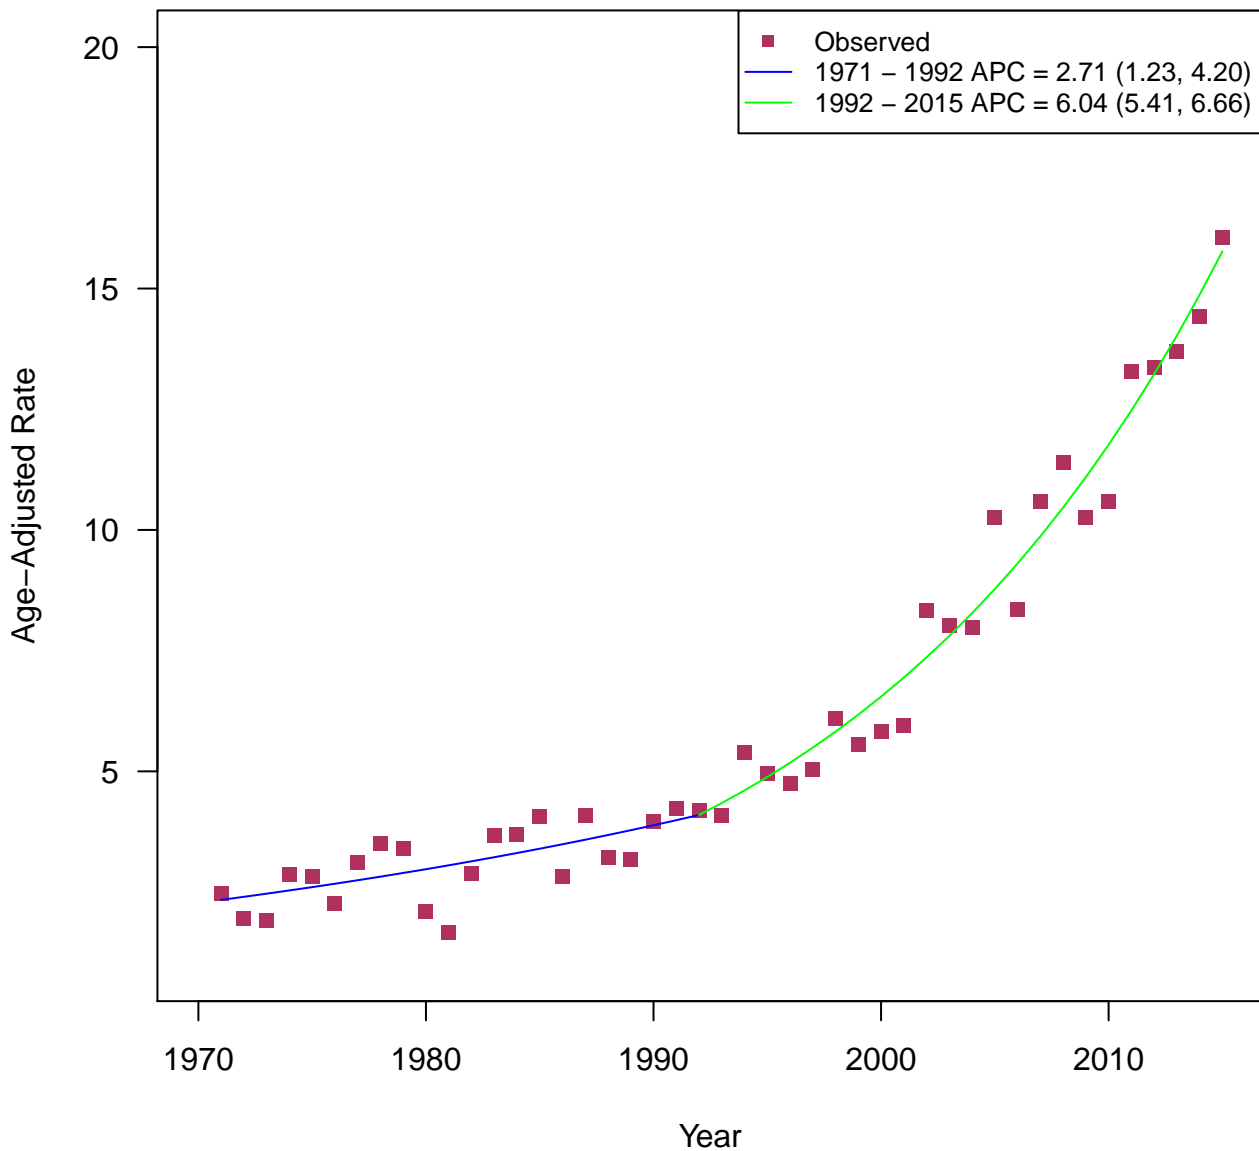



**Figure 396. Age-adjusted incidence rates of thyroid cancer in males aged 60–69 years in Canada, 1971–2015**

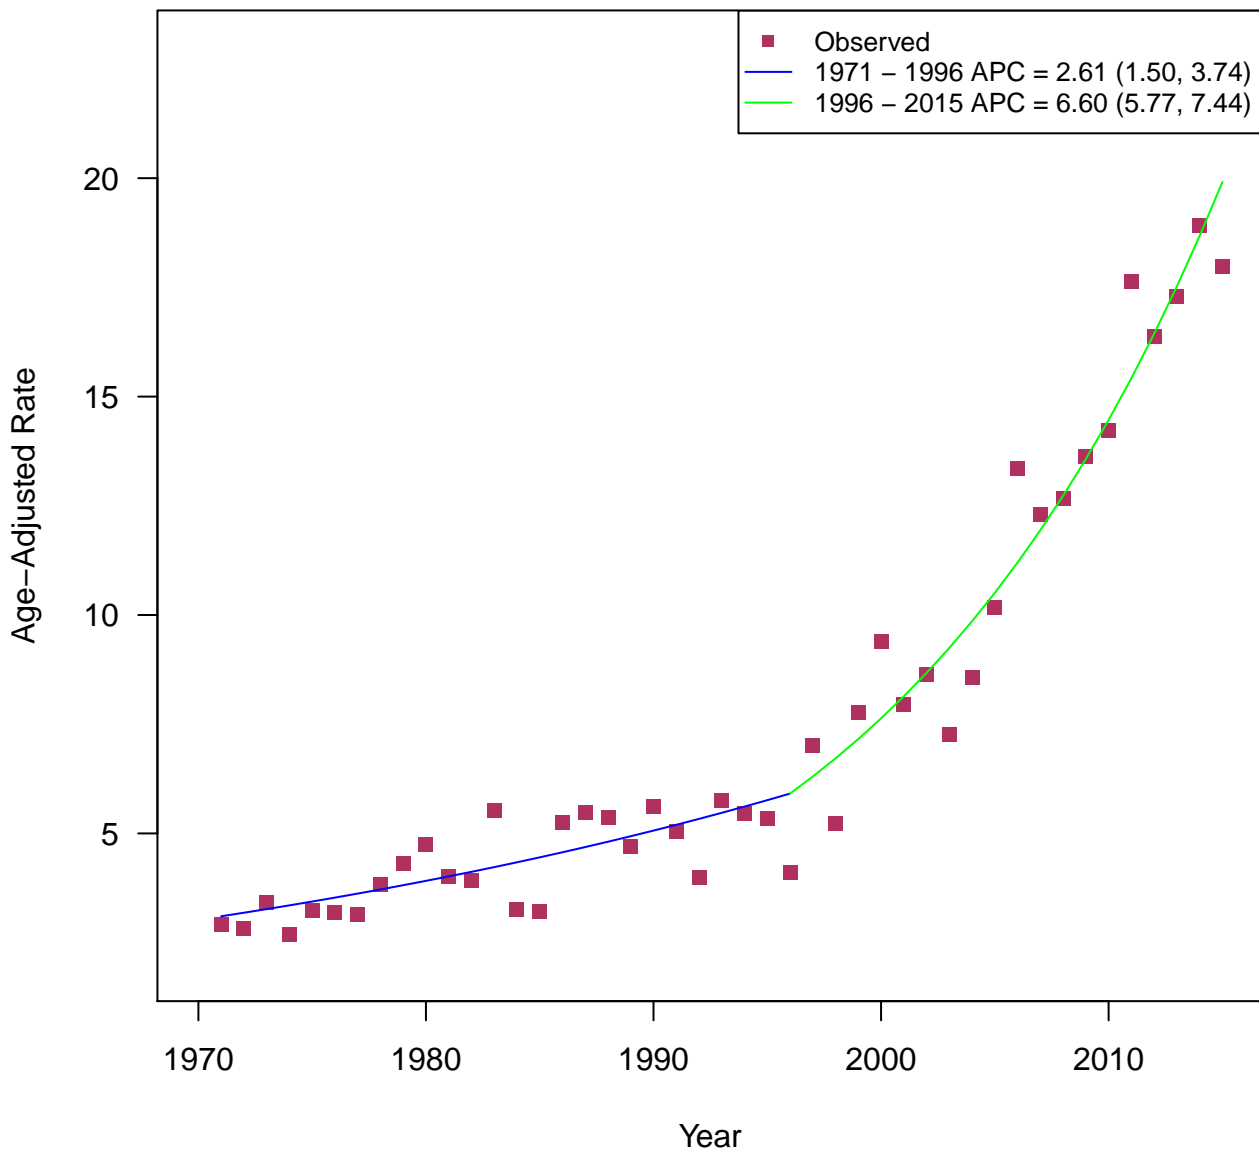

**Figure 397. Age-adjusted incidence rates of thyroid cancer in males aged 70–79 years in Canada, 1971–2015**

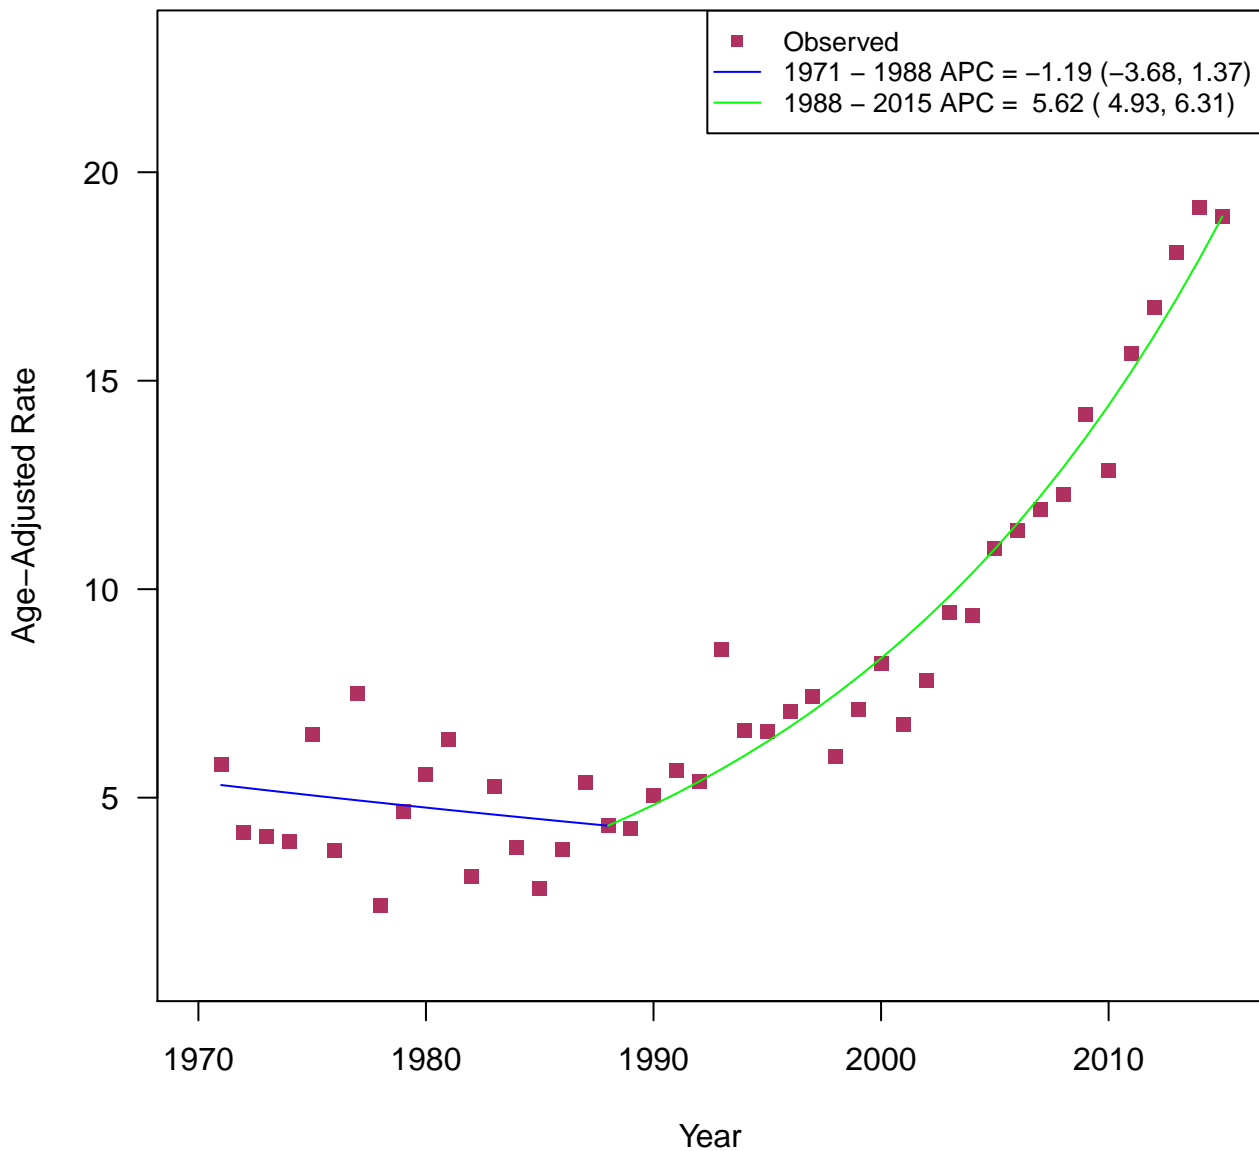

**Figure 398. Age-adjusted incidence rates of thyroid cancer in males aged 80–89 years in Canada, 1971–2015**

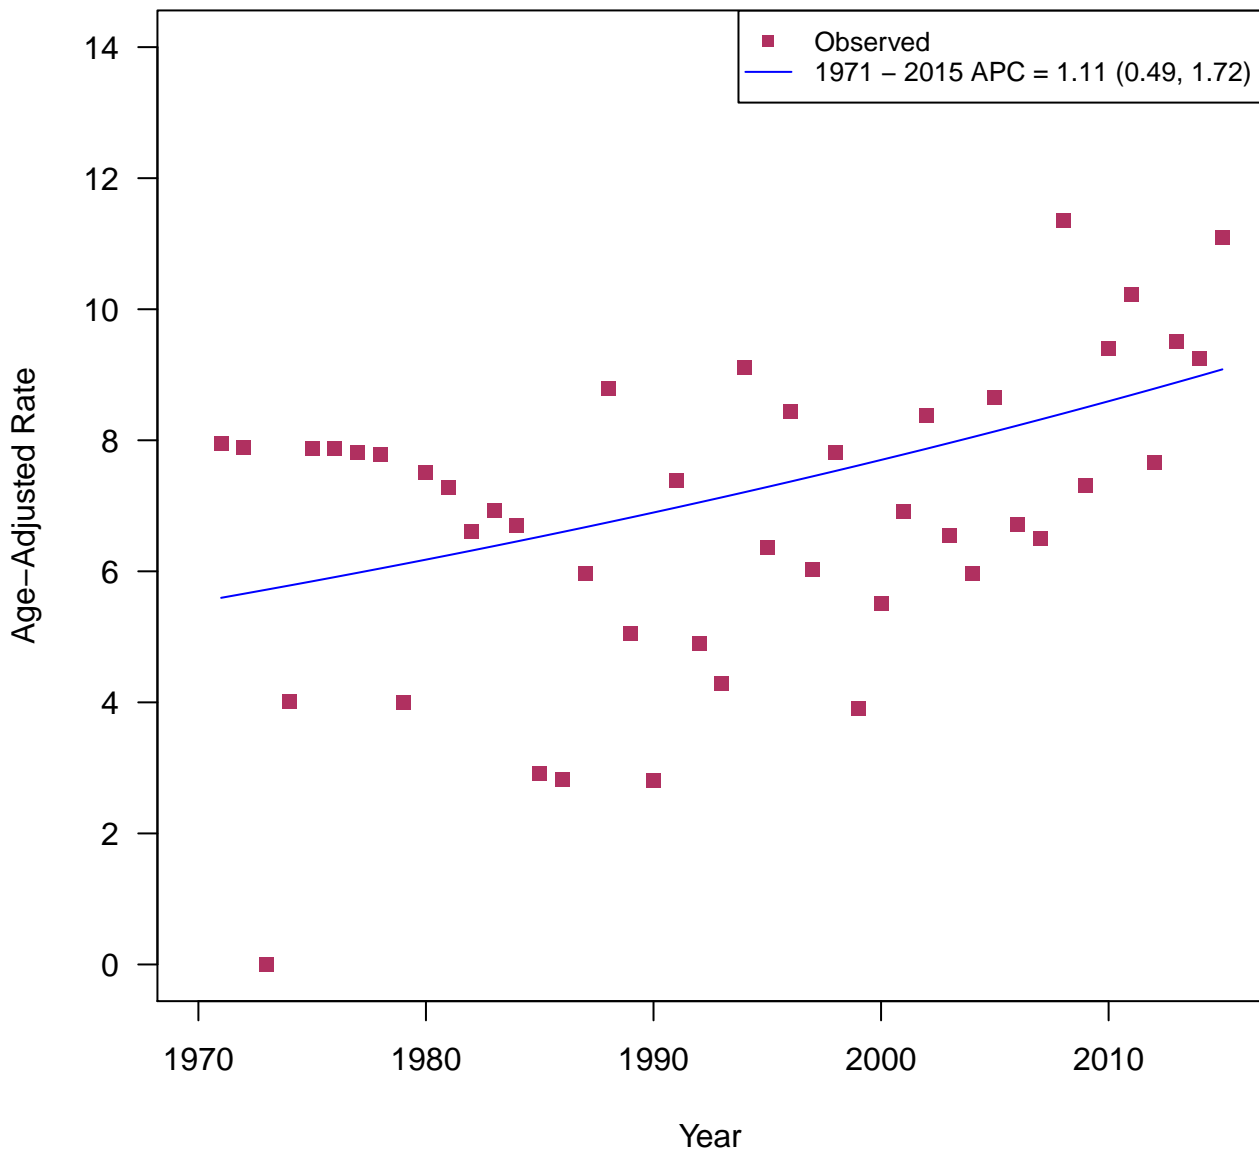

**Figure 399. Age-adjusted incidence rates of thyroid cancer in females aged 20–29 years in Canada, 1971–2015**

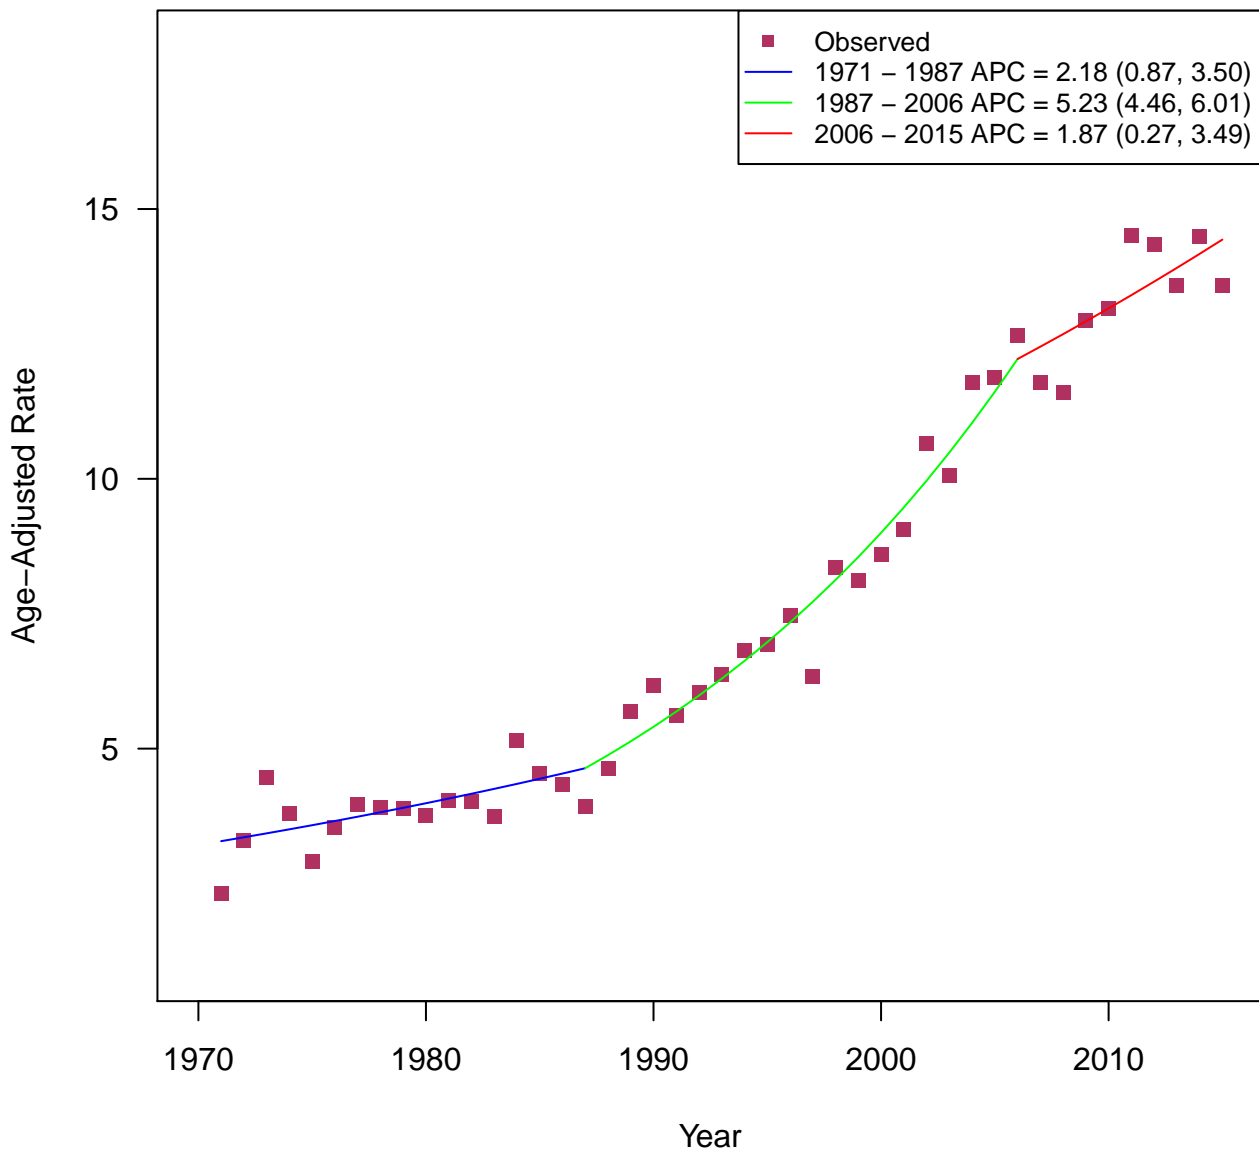

**Figure 400. Age-adjusted incidence rates of thyroid cancer in females aged 20–39 years in Canada, 1971–2015**

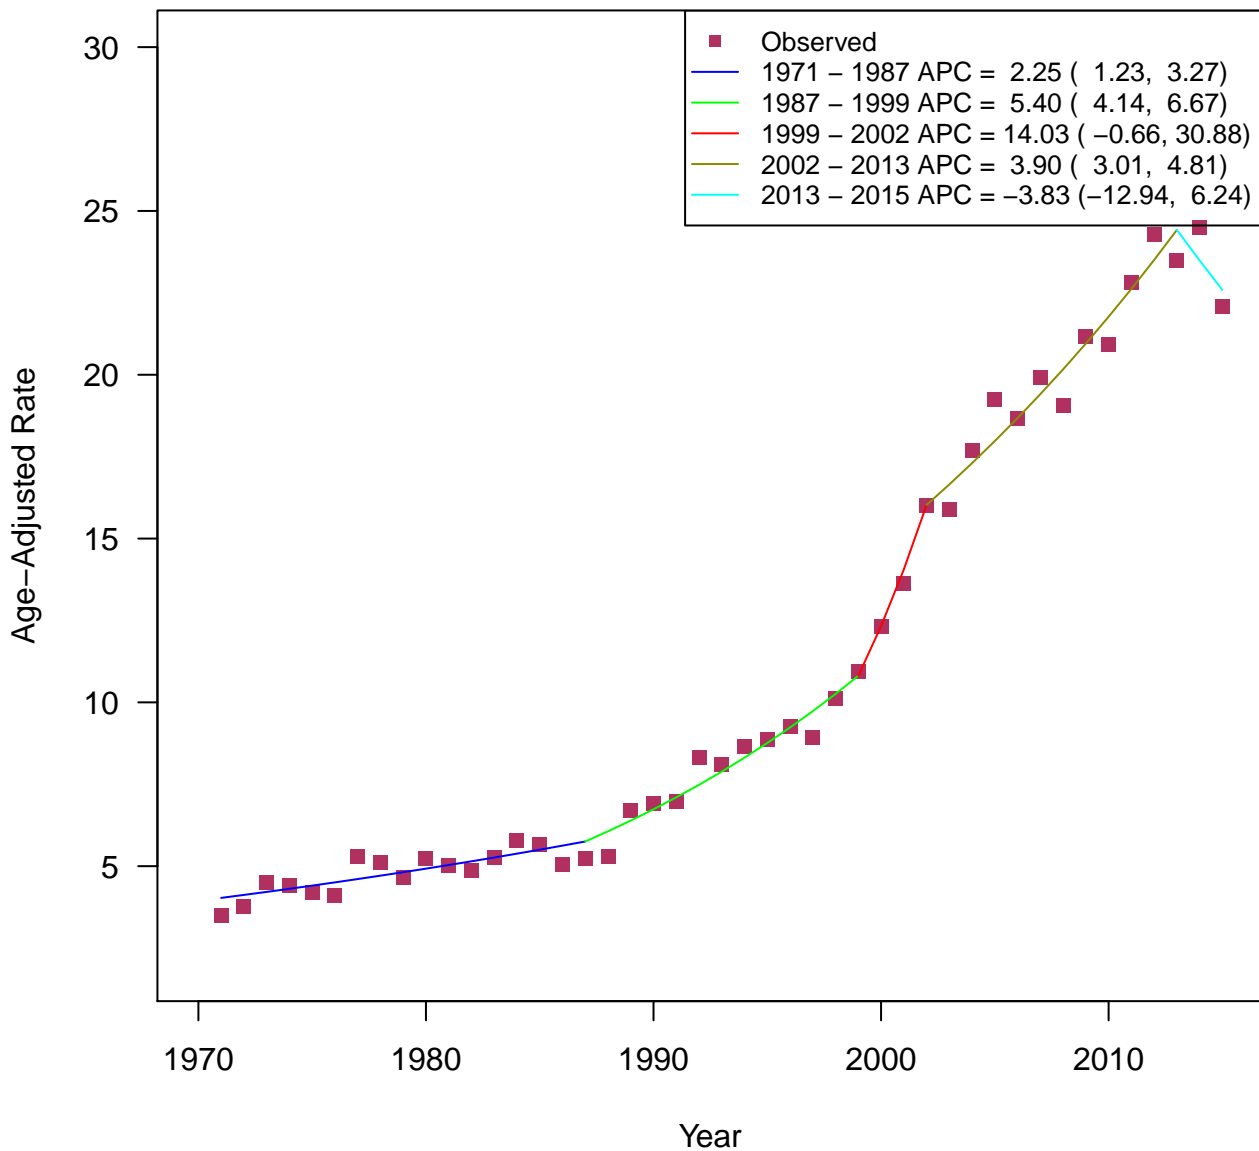

**Figure 401. Age-adjusted incidence rates of thyroid cancer in females aged 30–39 years in Canada, 1971–2015**

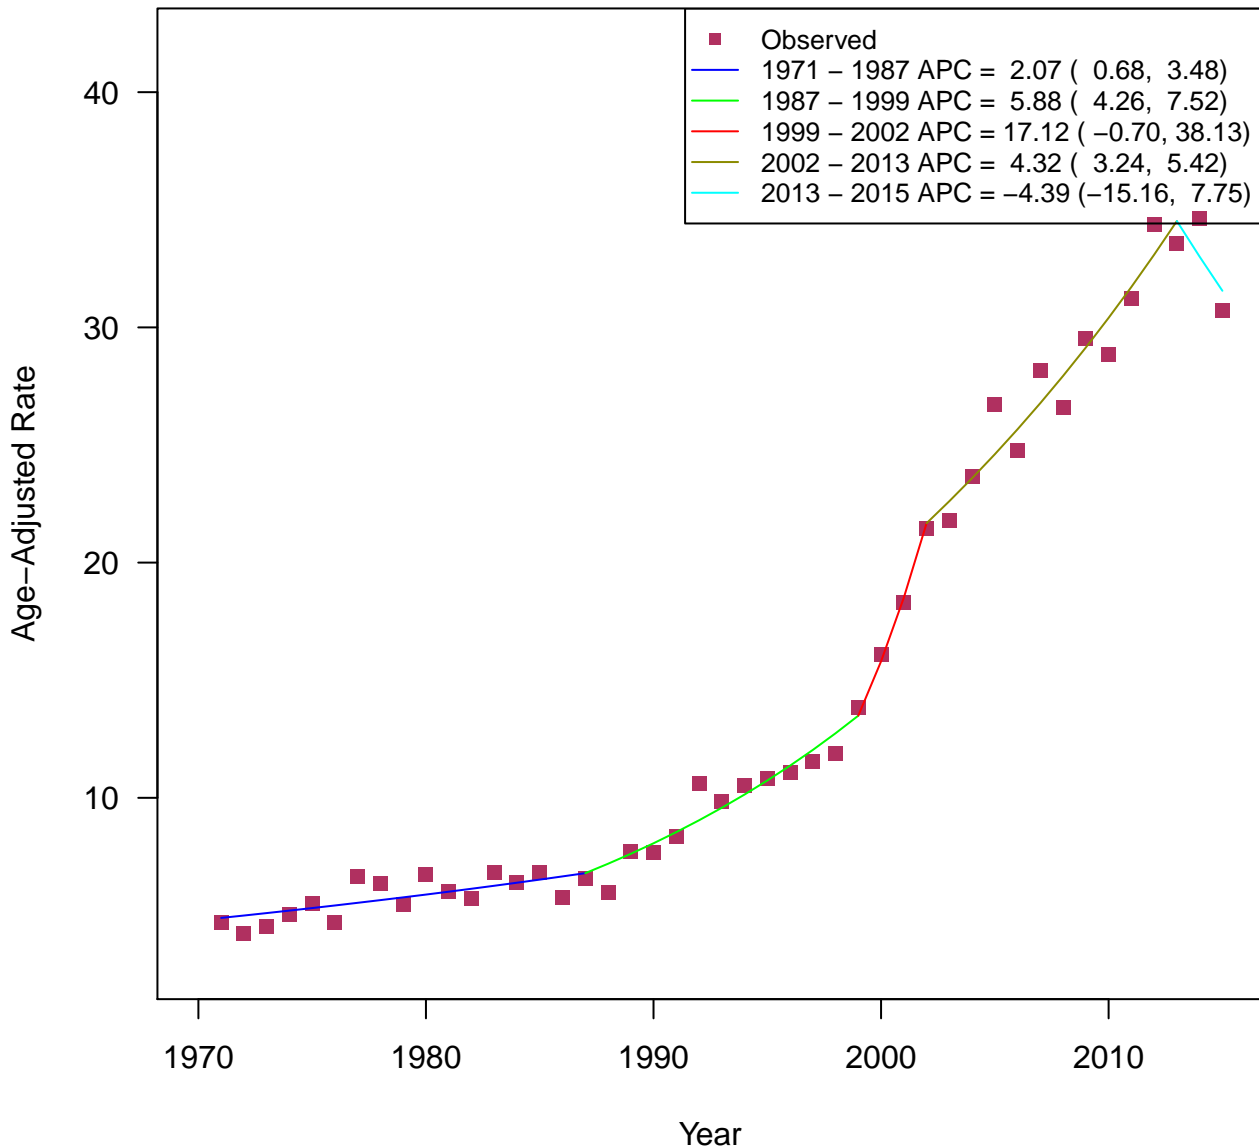

**Figure 402. Age-adjusted incidence rates of thyroid cancer in females aged 40–49 years in Canada, 1971–2015**

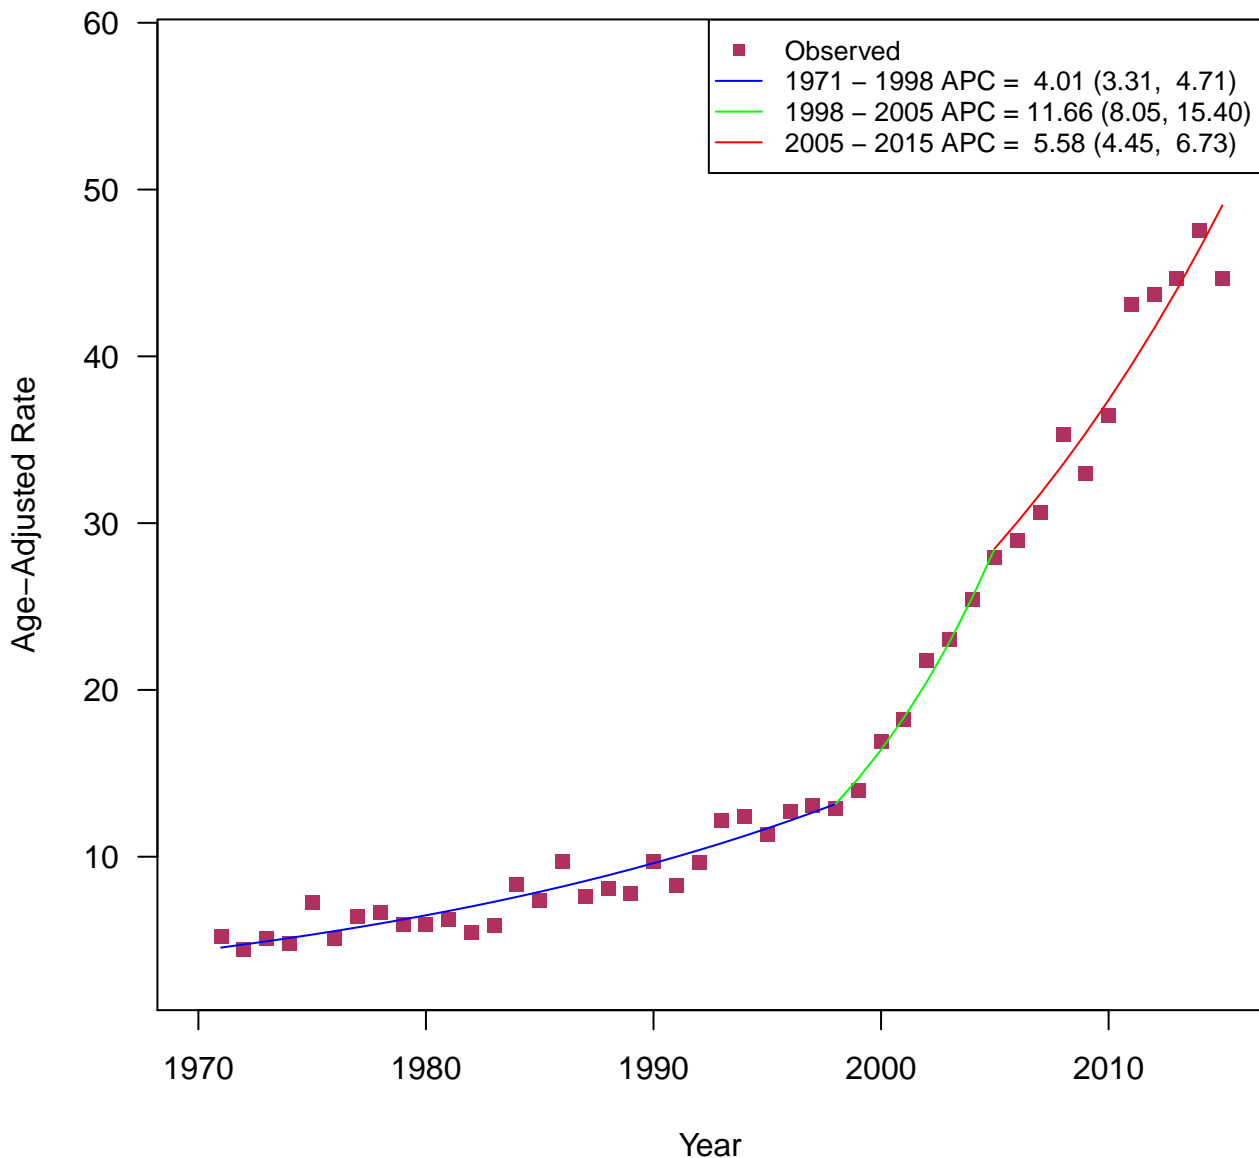

**Figure 403. Age-adjusted incidence rates of thyroid cancer in females aged 50–59 years in Canada, 1971–2015**

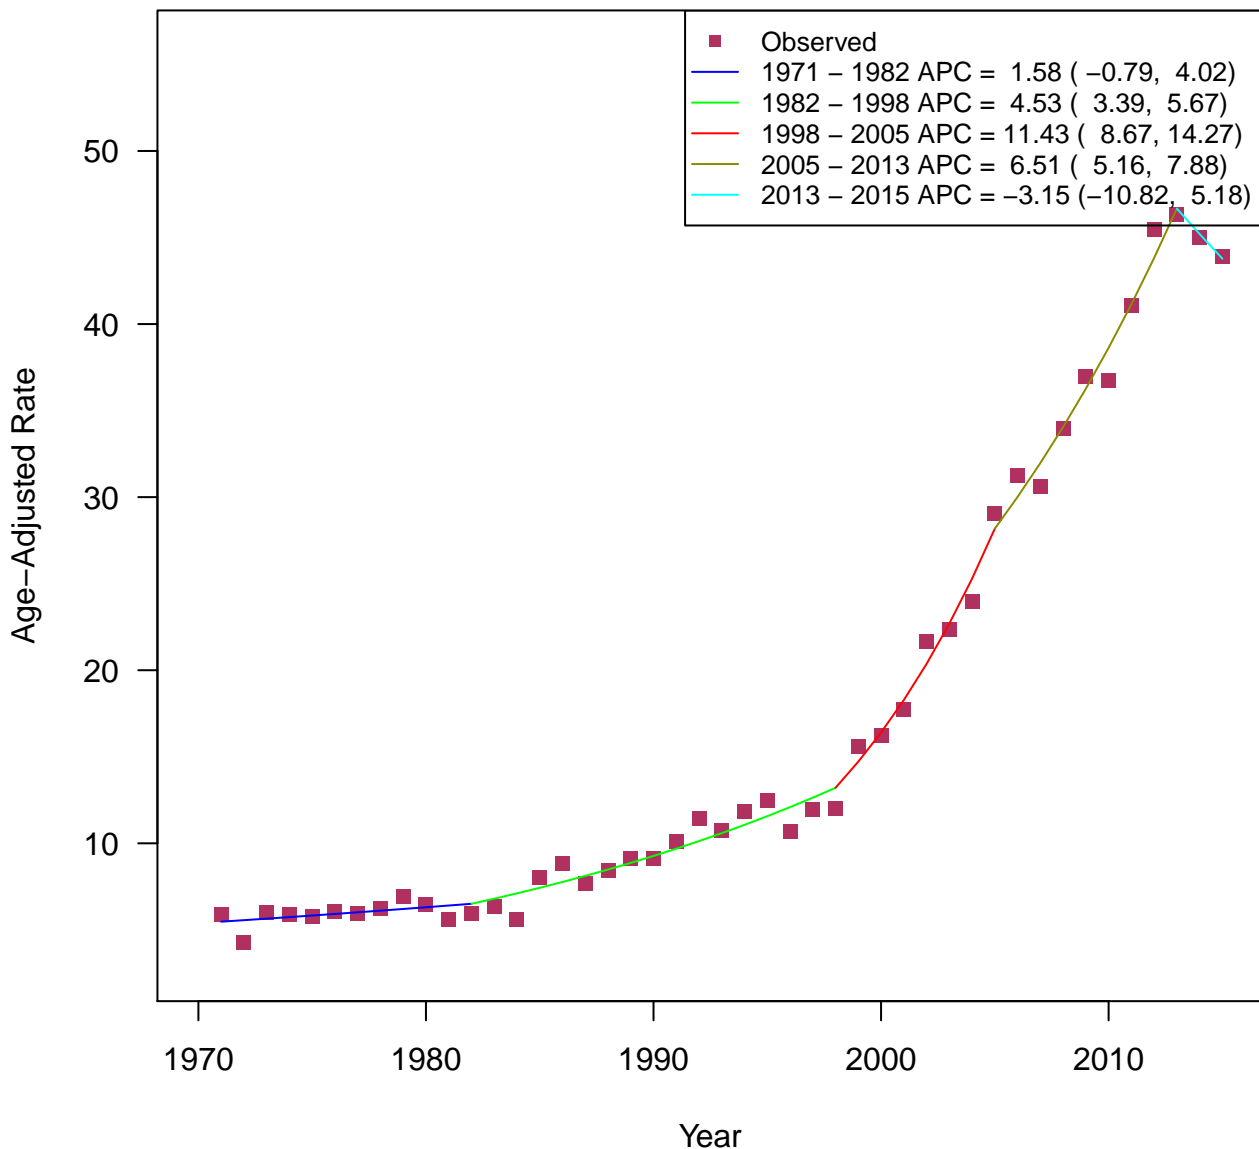



**Figure 404. Age-adjusted incidence rates of thyroid cancer in females aged 60–69 years in Canada, 1971–2015**

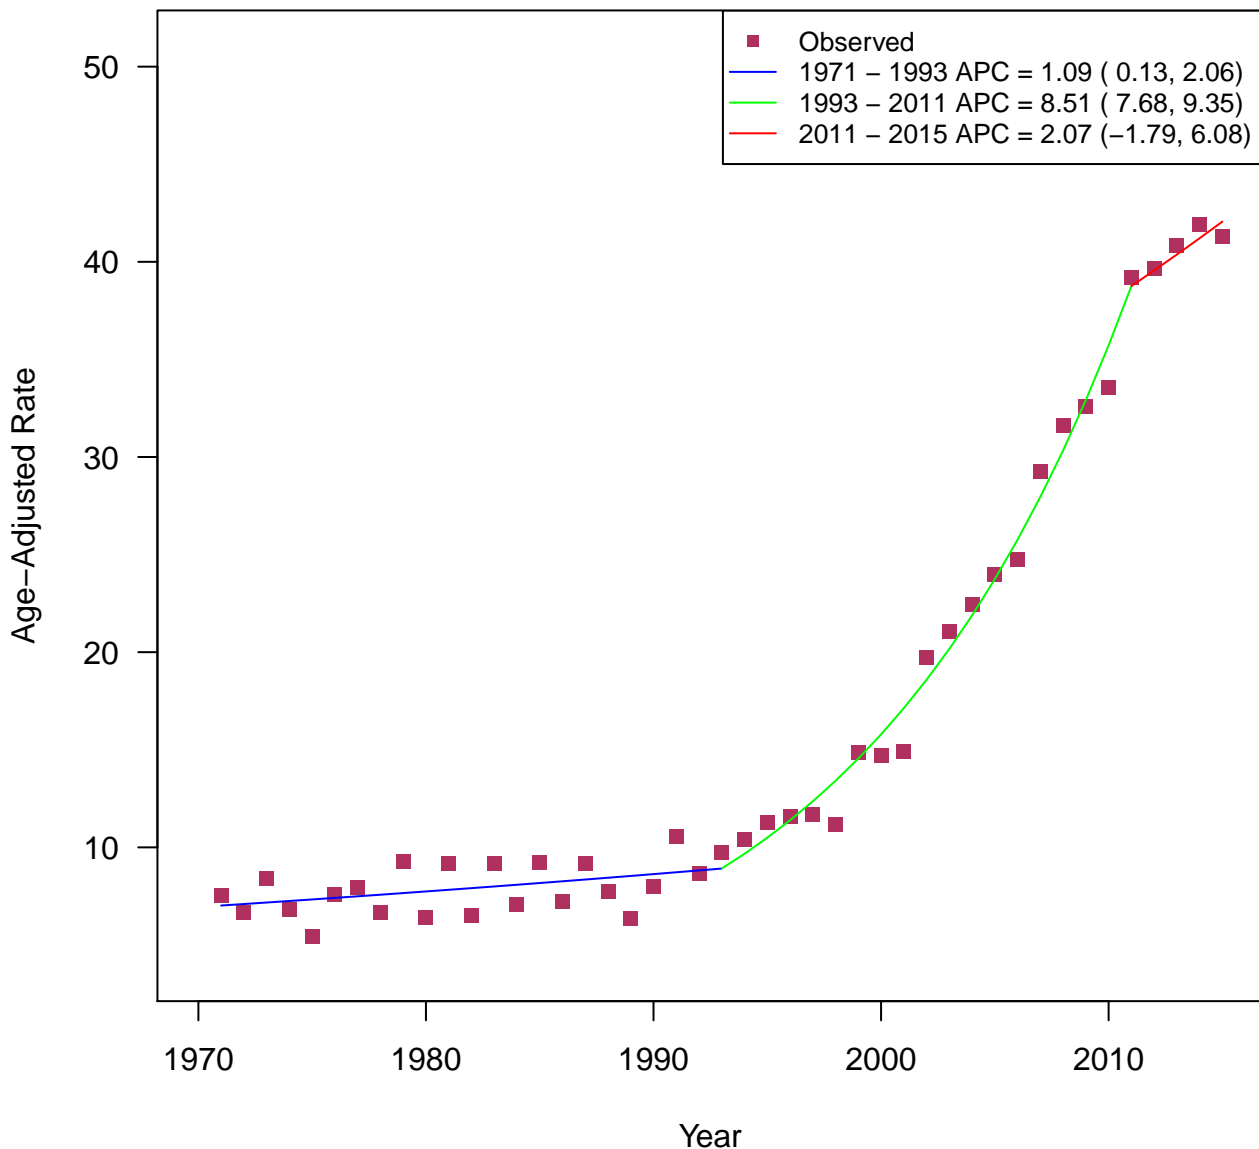

**Figure 405. Age-adjusted incidence rates of thyroid cancer in females aged 70–79 years in Canada, 1971–2015**

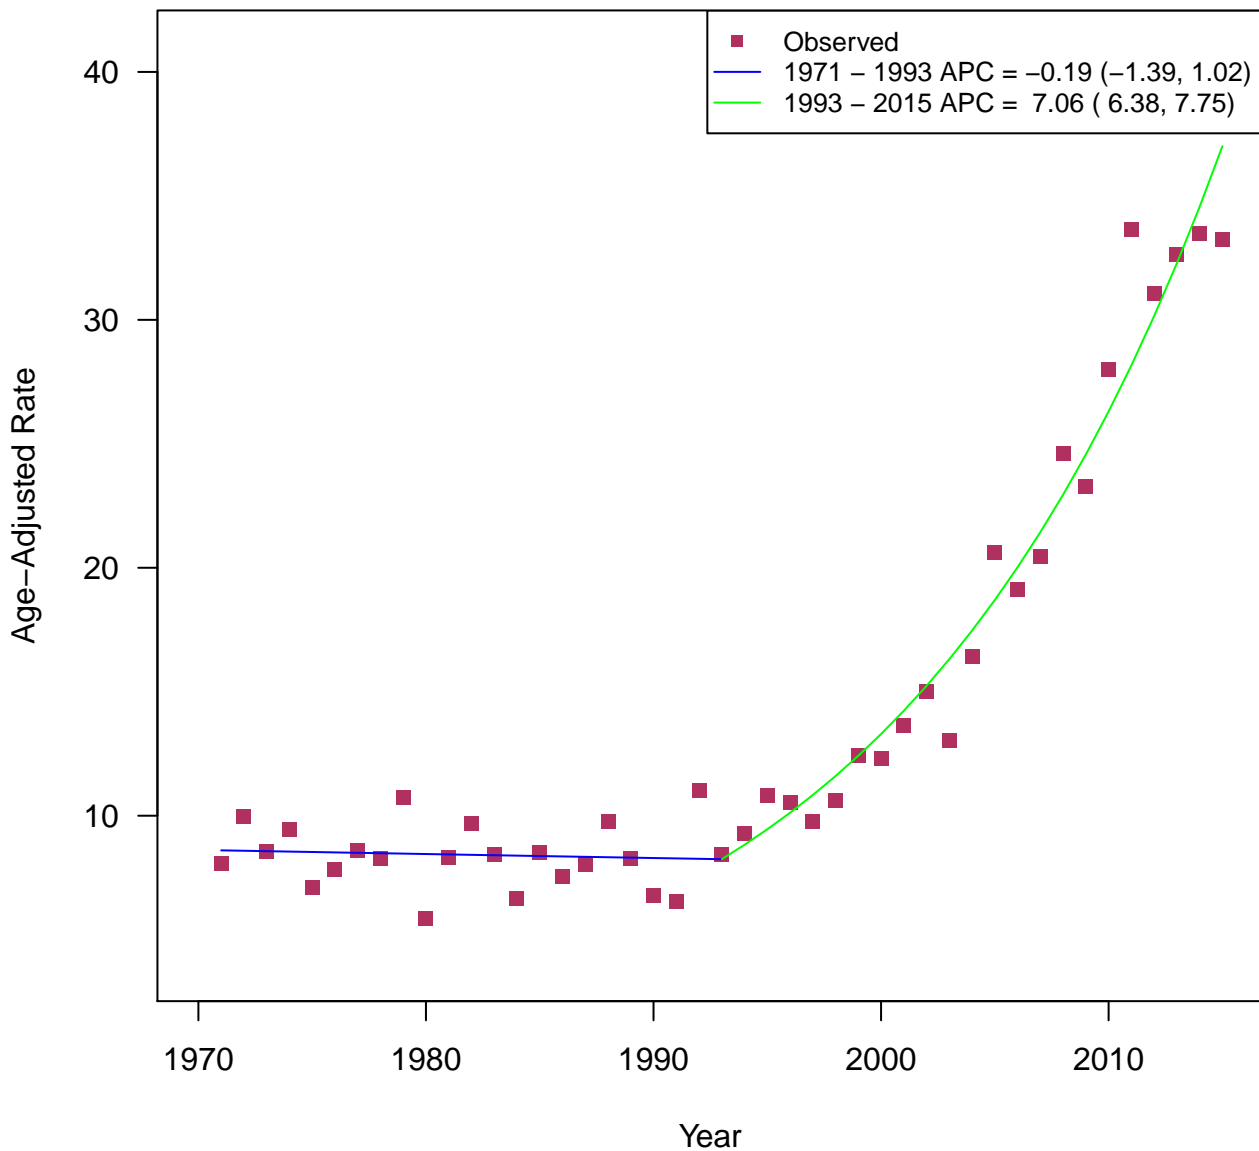

**Figure 406. Age-adjusted incidence rates of thyroid cancer in females aged 80–89 years in Canada, 1971–2015**

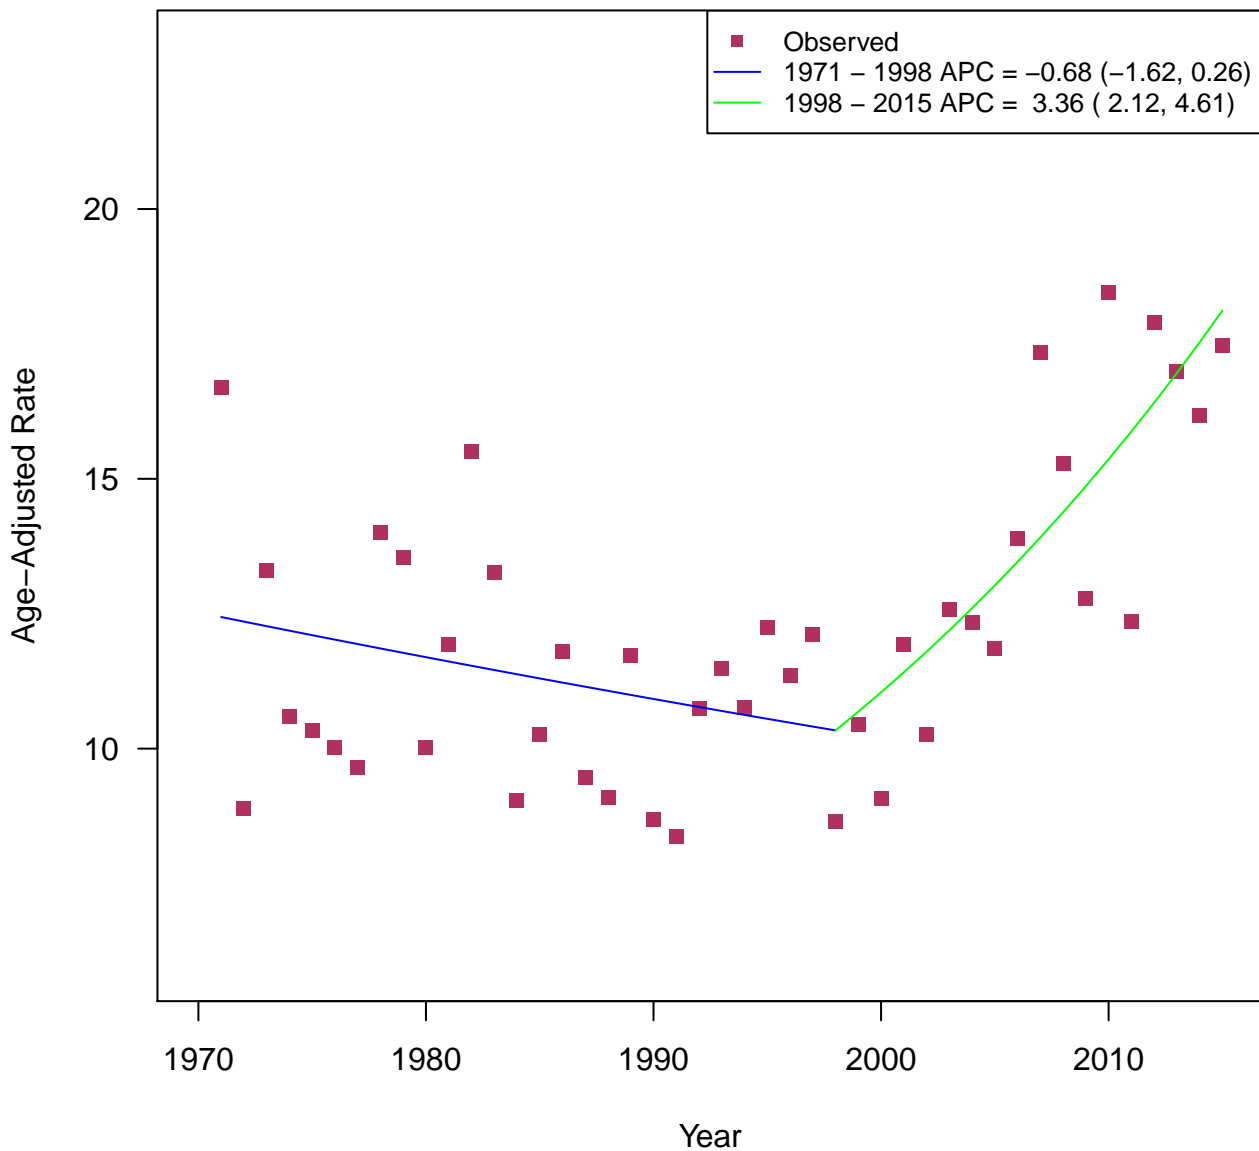

Supplement: 190355-res-3-at.pdf [file 190355-res-3-at.pdf]
